# Supplementary material
Source: MDPI journal article supplement (https://www.mdpi.com/2304-6740/5/4/73)

# checkCIF/PLATON report

Structure factors have been supplied for datablock(s) FF471\_0m\_a\_sq

THIS REPORT IS FOR GUIDANCE ONLY. IF USED AS PART OF A REVIEW PROCEDURE FOR PUBLICATION, IT SHOULD NOT REPLACE THE EXPERTISE OF AN EXPERIENCED CRYSTALLOGRAPHIC REFEREE.

No syntax errors found.      CIF dictionary      Interpreting this report

## Datablock: FF471\_0m\_a\_sq

---

|                        |                                  |                                 |
|------------------------|----------------------------------|---------------------------------|
| Bond precision:        | C-C = 0.0063 A                   | Wavelength=0.71073              |
| Cell:                  | a=14.2851(6)                     | b=18.9090(8)      c=29.8721(12) |
|                        | alpha=90                         | beta=97.011(2)      gamma=90    |
| Temperature:           | 150 K                            |                                 |
|                        | Calculated                       | Reported                        |
| Volume                 | 8008.6(6)                        | 8008.6(6)                       |
| Space group            | P 21/c                           | P 21/c                          |
| Hall group             | -P 2ybc                          | -P 2ybc                         |
| Moiety formula         | C69 H45 F18 N5 P4 Ru [+ solvent] | ?                               |
| Sum formula            | C69 H45 F18 N5 P4 Ru [+ solvent] | C69 H45 F18 N5 P4 Ru            |
| Mr                     | 1511.05                          | 1511.05                         |
| Dx, g cm <sup>-3</sup> | 1.253                            | 1.253                           |
| Z                      | 4                                | 4                               |
| Mu (mm <sup>-1</sup> ) | 0.356                            | 0.356                           |
| F000                   | 3040.0                           | 3040.0                          |
| F000'                  | 3038.45                          |                                 |
| h,k,lmax               | 17,23,37                         | 17,23,37                        |
| Nref                   | 16513                            | 16240                           |
| Tmin,Tmax              | 0.841,0.879                      | 0.720,0.880                     |
| Tmin'                  | 0.802                            |                                 |

Correction method= # Reported T Limits: Tmin=0.720 Tmax=0.880  
AbsCorr = MULTI-SCAN

Data completeness= 0.983      Theta(max)= 26.450

R(reflections)= 0.0666( 12710)      wR2(reflections)= 0.2002( 16238)

S = 1.436      Npar= 877

---

The following ALERTS were generated. Each ALERT has the format

**test-name\_ALERT\_alert-type\_alert-level.**

Click on the hyperlinks for more details of the test.

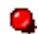

#### Alert level A

|                            |                             |            |
|----------------------------|-----------------------------|------------|
| PLAT213_ALERT_2_A Atom F2  | has ADP max/min Ratio ..... | 6.3 prolat |
| PLAT213_ALERT_2_A Atom F15 | has ADP max/min Ratio ..... | 7.7 prolat |

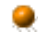

#### Alert level B

|                                                                    |         |
|--------------------------------------------------------------------|---------|
| PLAT910_ALERT_3_B Missing # of FCF Reflection(s) Below Theta(Min). | 13 Note |
|--------------------------------------------------------------------|---------|

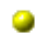

#### Alert level C

|                                                                    |                             |             |
|--------------------------------------------------------------------|-----------------------------|-------------|
| PLAT213_ALERT_2_C Atom F1                                          | has ADP max/min Ratio ..... | 3.5 prolat  |
| PLAT213_ALERT_2_C Atom F3                                          | has ADP max/min Ratio ..... | 3.8 prolat  |
| PLAT213_ALERT_2_C Atom F10                                         | has ADP max/min Ratio ..... | 3.9 prolat  |
| PLAT213_ALERT_2_C Atom F13                                         | has ADP max/min Ratio ..... | 3.2 prolat  |
| PLAT213_ALERT_2_C Atom F14                                         | has ADP max/min Ratio ..... | 3.5 prolat  |
| PLAT213_ALERT_2_C Atom F16                                         | has ADP max/min Ratio ..... | 3.4 prolat  |
| PLAT213_ALERT_2_C Atom F17                                         | has ADP max/min Ratio ..... | 3.7 prolat  |
| PLAT213_ALERT_2_C Atom F18                                         | has ADP max/min Ratio ..... | 3.5 prolat  |
| PLAT220_ALERT_2_C Non-Solvent Resd 1 C Ueq(max)/Ueq(min) Range     |                             | 3.4 Ratio   |
| PLAT220_ALERT_2_C Non-Solvent Resd 1 F Ueq(max)/Ueq(min) Range     |                             | 3.8 Ratio   |
| PLAT230_ALERT_2_C Hirshfeld Test Diff for F3 -- C34 ..             |                             | 5.2 s.u.    |
| PLAT234_ALERT_4_C Large Hirshfeld Difference F1 -- C34 ..          |                             | 0.17 Ang.   |
| PLAT234_ALERT_4_C Large Hirshfeld Difference F14 -- C60 ..         |                             | 0.19 Ang.   |
| PLAT906_ALERT_3_C Large K value in the Analysis of Variance .....  |                             | 2.129 Check |
| PLAT911_ALERT_3_C Missing # FCF Refl Between THmin & STh/L= 0.600  |                             | 47 Report   |
| PLAT913_ALERT_3_C Missing # of Very Strong Reflections in FCF .... |                             | 4 Note      |
| PLAT934_ALERT_3_C Number of (Iobs-Icalc)/SigmaW > 10 Outliers .... |                             | 1 Check     |
| PLAT978_ALERT_2_C Number C-C Bonds with Positive Residual Density. |                             | 0 Info      |

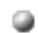

#### Alert level G

|                                                                      |           |
|----------------------------------------------------------------------|-----------|
| PLAT063_ALERT_4_G Crystal Size Likely too Large for Beam Size ....   | 0.62 mm   |
| PLAT242_ALERT_2_G Low 'MainMol' Ueq as Compared to Neighbors of      | C34 Check |
| PLAT242_ALERT_2_G Low 'MainMol' Ueq as Compared to Neighbors of      | C41 Check |
| PLAT242_ALERT_2_G Low 'MainMol' Ueq as Compared to Neighbors of      | C48 Check |
| PLAT242_ALERT_2_G Low 'MainMol' Ueq as Compared to Neighbors of      | C55 Check |
| PLAT242_ALERT_2_G Low 'MainMol' Ueq as Compared to Neighbors of      | C60 Check |
| PLAT242_ALERT_2_G Low 'MainMol' Ueq as Compared to Neighbors of      | C67 Check |
| PLAT606_ALERT_4_G VERY LARGE Solvent Accessible VOID(S) in Structure | ! Info    |
| PLAT869_ALERT_4_G ALERTS Related to the use of SQUEEZE Suppressed    | ! Info    |
| PLAT912_ALERT_4_G Missing # of FCF Reflections Above STh/L= 0.600    | 217 Note  |
| PLAT933_ALERT_2_G Number of OMIT Records in Embedded .res File ...   | 2 Note    |

- 2 **ALERT level A** = Most likely a serious problem - resolve or explain  
 1 **ALERT level B** = A potentially serious problem, consider carefully  
 18 **ALERT level C** = Check. Ensure it is not caused by an omission or oversight  
 11 **ALERT level G** = General information/check it is not something unexpected

- 0 ALERT type 1 CIF construction/syntax error, inconsistent or missing data  
 21 ALERT type 2 Indicator that the structure model may be wrong or deficient  
 5 ALERT type 3 Indicator that the structure quality may be low  
 6 ALERT type 4 Improvement, methodology, query or suggestion  
 0 ALERT type 5 Informative message, check

It is advisable to attempt to resolve as many as possible of the alerts in all categories. Often the minor alerts point to easily fixed oversights, errors and omissions in your CIF or refinement strategy, so attention to these fine details can be worthwhile. In order to resolve some of the more serious problems it may be necessary to carry out additional measurements or structure refinements. However, the purpose of your study may justify the reported deviations and the more serious of these should normally be commented upon in the discussion or experimental section of a paper or in the "special\_details" fields of the CIF. checkCIF was carefully designed to identify outliers and unusual parameters, but every test has its limitations and alerts that are not important in a particular case may appear. Conversely, the absence of alerts does not guarantee there are no aspects of the results needing attention. It is up to the individual to critically assess their own results and, if necessary, seek expert advice.

### **Publication of your CIF in IUCr journals**

A basic structural check has been run on your CIF. These basic checks will be run on all CIFs submitted for publication in IUCr journals (*Acta Crystallographica*, *Journal of Applied Crystallography*, *Journal of Synchrotron Radiation*); however, if you intend to submit to *Acta Crystallographica Section C* or *E* or *IUCrData*, you should make sure that full publication checks are run on the final version of your CIF prior to submission.

### **Publication of your CIF in other journals**

Please refer to the *Notes for Authors* of the relevant journal for any special instructions relating to CIF submission.

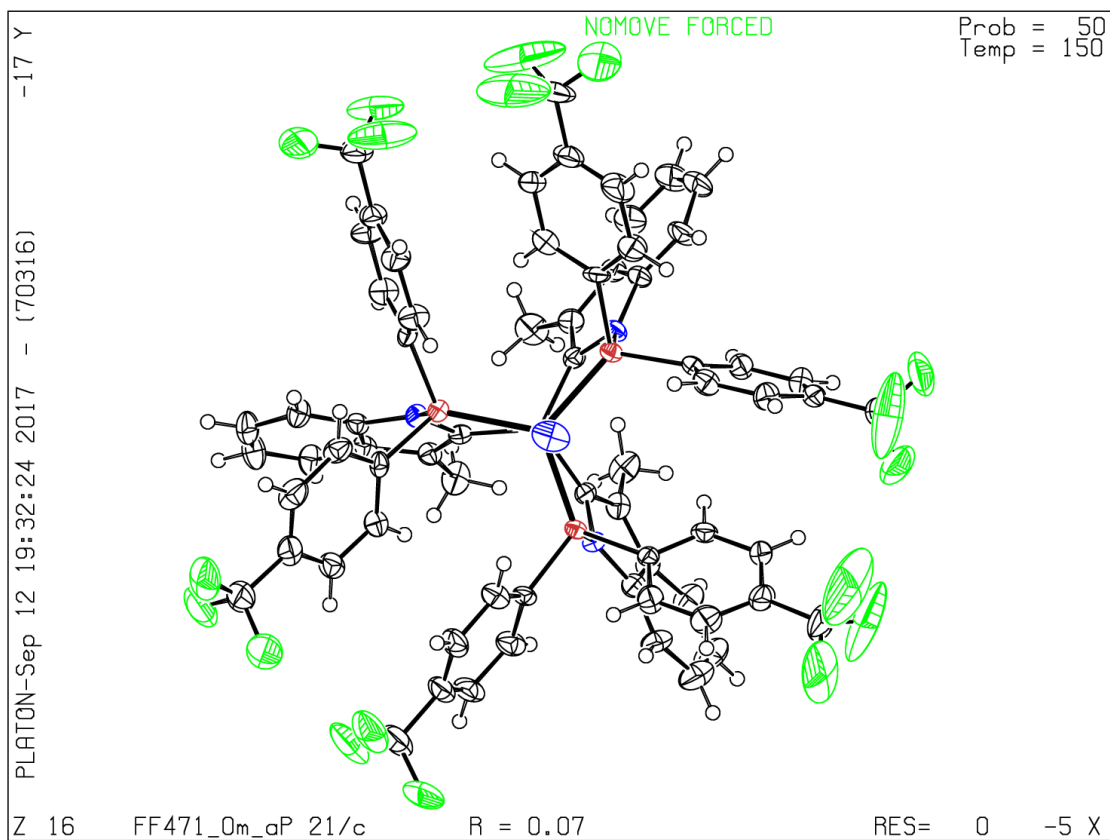

Supplement: s1 [file s1]
