# Supplementary material
Source: MDPI journal article supplement (https://www.mdpi.com/2304-6740/5/4/73)
Supplement: s1 [file s1]

# Supplementary Materials: 3-methylindole-based tripodal tetraphosphine ruthenium complexes in N<sub>2</sub> coordination and reduction and formic acid dehydrogenation

Fenna F. van de Watering, Nicol Heijtbrink, Jarl Ivar van der Vlugt, Wojciech I. Dzik, Bas de Bruin and Joost N. H. Reek

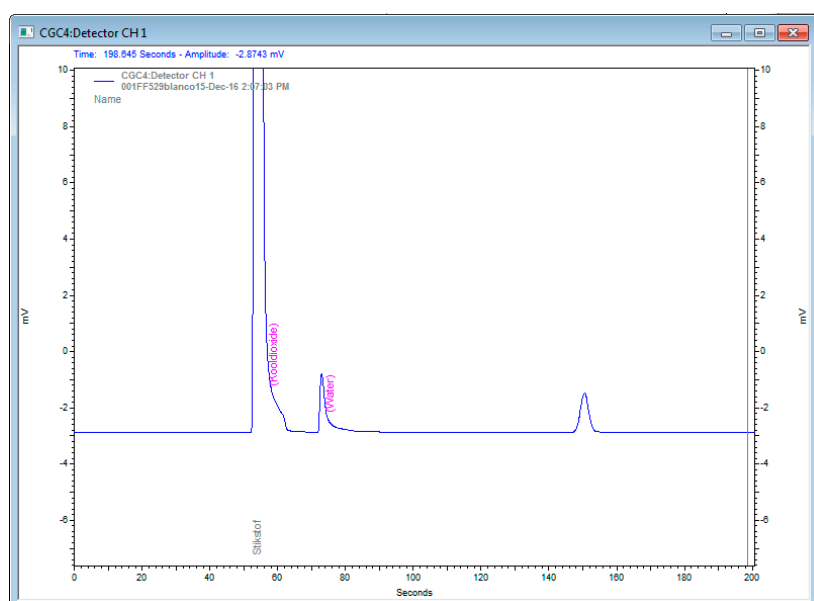

Figure S1. Blank Channel 1 GC.

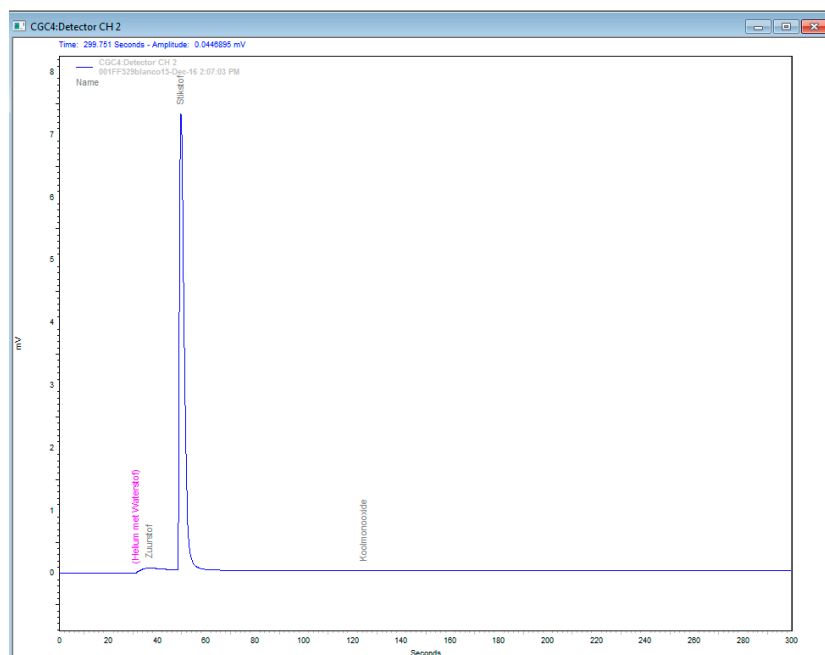

Figure S2, Blank Channel 2, GC.

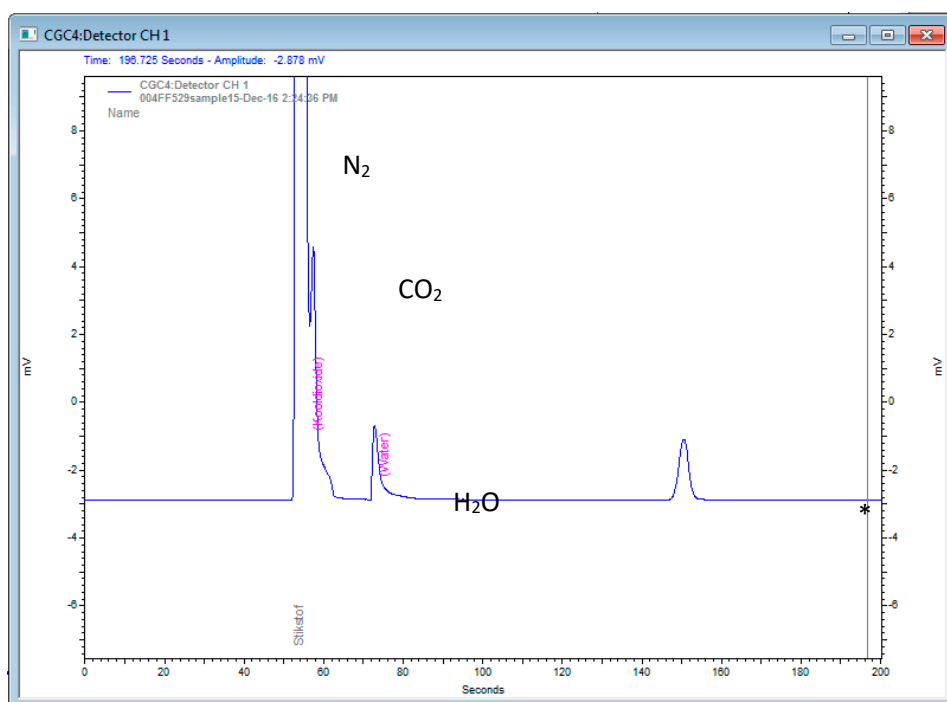

Figure S3. GC trace of the CO<sub>2</sub> channel. Visible peaks of N<sub>2</sub>, CO<sub>2</sub>, H<sub>2</sub>O and an artifact (\*). The artifact is also visible in the blank (see Figure S1).

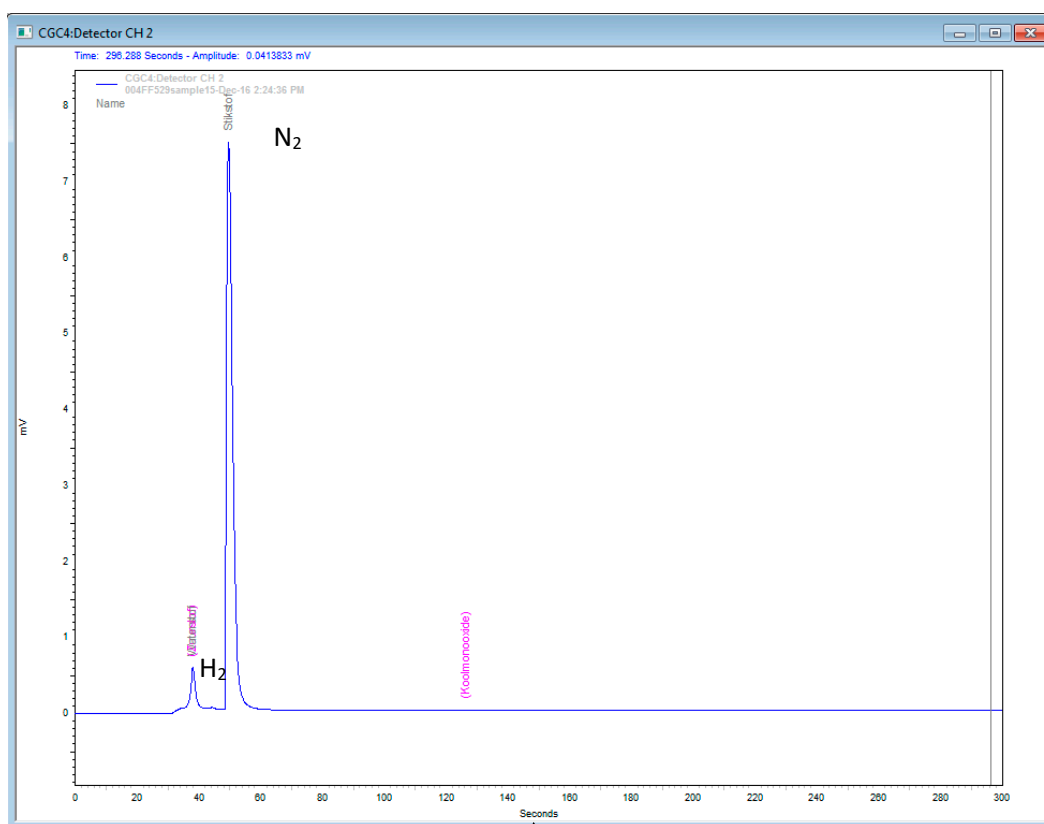

Figure S4. GC trace of the H<sub>2</sub> channel. Visible peaks of H<sub>2</sub> and N<sub>2</sub>. The retention time of CO is marked with an arrow.
