# Supplementary material
Source: MDPI journal article supplement (https://www.mdpi.com/2304-6740/5/4/73)
Supplement: s1 [file s1]

Archive with 8 entries (7 files):
- inorganics-233055-Supplementary/
- inorganics-233055-Supplementary/ff400_0m_a_sq.cif
- inorganics-233055-Supplementary/ff400_0m_a_sq_checkcif.pdf
- inorganics-233055-Supplementary/FF401_2_0m_a_sq.cif
- inorganics-233055-Supplementary/FF401_2_0m_a_sq_checkcif.pdf
- inorganics-233055-Supplementary/FF471_0m_a_sq.cif
- inorganics-233055-Supplementary/FF471_0m_a_sq_checkcif.pdf
- inorganics-233055-Supplementary/inorganics-233055-Supplementary material.pdf
