# Supplementary material
Source: MDPI journal article supplement (https://www.mdpi.com/2304-6740/5/4/73)
Supplement: s1 [file s1 › inorganics-233055-Supplementary/ff400_0m_a_sq.cif]

 
data_ff400_0m_a_sq
 
_audit_creation_method            'SHELXL-2016/3'
_shelx_SHELXL_version_number      '2016/3'
_chemical_name_systematic         ?
_chemical_name_common             ?
_chemical_melting_point           ?
_chemical_formula_moiety          ?
_chemical_formula_sum
 'C65 H55 Cl6 N3 P4 Ru' 
_chemical_formula_weight          1315.77

loop_
 _atom_type_symbol
 _atom_type_description
 _atom_type_scat_dispersion_real
 _atom_type_scat_dispersion_imag
 _atom_type_scat_source
 'C'  'C'   0.0033   0.0016
 'International Tables Vol C Tables 4.2.6.8 and 6.1.1.4'
 'H'  'H'   0.0000   0.0000
 'International Tables Vol C Tables 4.2.6.8 and 6.1.1.4'
 'N'  'N'   0.0061   0.0033
 'International Tables Vol C Tables 4.2.6.8 and 6.1.1.4'
 'P'  'P'   0.1023   0.0942
 'International Tables Vol C Tables 4.2.6.8 and 6.1.1.4'
 'Cl'  'Cl'   0.1484   0.1585
 'International Tables Vol C Tables 4.2.6.8 and 6.1.1.4'
 'Ru'  'Ru'  -1.2594   0.8363
 'International Tables Vol C Tables 4.2.6.8 and 6.1.1.4'
 
_space_group_crystal_system       monoclinic
_space_group_IT_number            14
_space_group_name_H-M_alt         'P 21/n'
_space_group_name_Hall            '-P 2yn'
 
_shelx_space_group_comment
;
The symmetry employed for this shelxl refinement is uniquely defined
by the following loop, which should always be used as a source of
symmetry information in preference to the above space-group names.
They are only intended as comments.
;
 
loop_
 _space_group_symop_operation_xyz
 'x, y, z'
 '-x+1/2, y+1/2, -z+1/2'
 '-x, -y, -z'
 'x-1/2, -y-1/2, z-1/2'
 
_cell_length_a                    19.1879(9)
_cell_length_b                    18.1604(8)
_cell_length_c                    19.7879(9)
_cell_angle_alpha                 90
_cell_angle_beta                  91.012(2)
_cell_angle_gamma                 90
_cell_volume                      6894.2(5)
_cell_formula_units_Z             4
_cell_measurement_temperature     150(2)
_cell_measurement_reflns_used     133
_cell_measurement_theta_min       4.6154
_cell_measurement_theta_max       22.3389
 
_exptl_crystal_description        block
_exptl_crystal_colour             yellow
_exptl_crystal_density_meas       ?
_exptl_crystal_density_method     ?
_exptl_crystal_density_diffrn     1.268          
_exptl_crystal_F_000              2688
_exptl_transmission_factor_min    ?
_exptl_transmission_factor_max    ?
_exptl_crystal_size_max           0.483
_exptl_crystal_size_mid           0.340
_exptl_crystal_size_min           0.253
_exptl_absorpt_coefficient_mu     0.591
_shelx_estimated_absorpt_T_min    ?
_shelx_estimated_absorpt_T_max    ?
_exptl_absorpt_correction_type    multi-scan
_exptl_absorpt_correction_T_min   0.60
_exptl_absorpt_correction_T_max   0.75
_exptl_absorpt_process_details    'SADABS V2014/5 (Bruker AXS Inc.)'
_exptl_absorpt_special_details    ?
_diffrn_ambient_temperature       150(2)
_diffrn_radiation_wavelength      0.71073
_diffrn_radiation_type            MoK\a
_diffrn_source                    'sealed tube'
_diffrn_measurement_device_type   'Bruker D8 Quest ECO Photon 50'
_diffrn_measurement_method        ?
_diffrn_detector_area_resol_mean  ?
_diffrn_reflns_number             56511
_diffrn_reflns_av_unetI/netI      0.0382
_diffrn_reflns_av_R_equivalents   0.0440
_diffrn_reflns_limit_h_min        -22
_diffrn_reflns_limit_h_max        22
_diffrn_reflns_limit_k_min        -21
_diffrn_reflns_limit_k_max        21
_diffrn_reflns_limit_l_min        -23
_diffrn_reflns_limit_l_max        23
_diffrn_reflns_theta_min          2.468
_diffrn_reflns_theta_max          25.030
_diffrn_reflns_theta_full         25.030
_diffrn_measured_fraction_theta_max   0.997
_diffrn_measured_fraction_theta_full  0.997
_diffrn_reflns_Laue_measured_fraction_max    0.997
_diffrn_reflns_Laue_measured_fraction_full   0.997
_diffrn_reflns_point_group_measured_fraction_max   0.997
_diffrn_reflns_point_group_measured_fraction_full  0.997
_reflns_number_total              12141
_reflns_number_gt                 10290
_reflns_threshold_expression      'I > 2\s(I)'
_reflns_Friedel_coverage          0.000
_reflns_Friedel_fraction_max      .
_reflns_Friedel_fraction_full     .
 
_reflns_special_details
;
 Reflections were merged by SHELXL according to the crystal
 class for the calculation of statistics and refinement.
 
 Structure factors included contributions from the .fab file.
 
 _reflns_Friedel_fraction is defined as the number of unique
 Friedel pairs measured divided by the number that would be
 possible theoretically, ignoring centric projections and
 systematic absences.
;
 
_computing_data_collection        ?
_computing_cell_refinement        ?
_computing_data_reduction         ?
_computing_structure_solution     'SHELXT 2014/4 (Sheldrick, 2014)'
_computing_structure_refinement 'SHELXL-2016/3 (Sheldrick, 2016)'
_computing_molecular_graphics     ?
_computing_publication_material   ?
_refine_special_details           ?
_refine_ls_structure_factor_coef  Fsqd
_refine_ls_matrix_type            full
_refine_ls_weighting_scheme       calc
_refine_ls_weighting_details
'w=1/[\s^2^(Fo^2^)+(0.1000P)^2^] where P=(Fo^2^+2Fc^2^)/3'
_atom_sites_solution_primary      ?
_atom_sites_solution_secondary    ?
_atom_sites_solution_hydrogens    geom
_refine_ls_hydrogen_treatment     constr
_refine_ls_extinction_method      none
_refine_ls_extinction_coef        .
_refine_ls_number_reflns          12141
_refine_ls_number_parameters      715
_refine_ls_number_restraints      0
_refine_ls_R_factor_all           0.0505
_refine_ls_R_factor_gt            0.0412
_refine_ls_wR_factor_ref          0.1435
_refine_ls_wR_factor_gt           0.1353
_refine_ls_goodness_of_fit_ref    1.134
_refine_ls_restrained_S_all       1.134
_refine_ls_shift/su_max           0.003
_refine_ls_shift/su_mean          0.000
 
loop_
 _atom_site_label
 _atom_site_type_symbol
 _atom_site_fract_x
 _atom_site_fract_y
 _atom_site_fract_z
 _atom_site_U_iso_or_equiv
 _atom_site_adp_type
 _atom_site_occupancy
 _atom_site_site_symmetry_order  
 _atom_site_calc_flag
 _atom_site_refinement_flags_posn
 _atom_site_refinement_flags_adp
 _atom_site_refinement_flags_occupancy
 _atom_site_disorder_assembly
 _atom_site_disorder_group
RU1 Ru 0.52567(2) 0.71348(2) 0.32750(2) 0.01260(9) Uani 1 1 d . . . . .
CL1 Cl 0.44279(4) 0.63148(4) 0.38627(4) 0.02010(17) Uani 1 1 d . . . . .
CL2 Cl 0.56152(4) 0.60780(4) 0.25760(4) 0.01988(17) Uani 1 1 d . . . . .
P4 P 0.59296(4) 0.78191(4) 0.26986(4) 0.01338(17) Uani 1 1 d . . . . .
P1 P 0.44340(4) 0.73204(4) 0.24120(4) 0.01704(18) Uani 1 1 d . . . . .
P3 P 0.50870(4) 0.81576(4) 0.39298(4) 0.01492(17) Uani 1 1 d . . . . .
P2 P 0.63539(4) 0.68357(4) 0.38172(4) 0.01423(17) Uani 1 1 d . . . . .
CL4 Cl 0.39487(5) 0.42894(5) 0.34513(5) 0.0401(2) Uani 1 1 d . . . . .
CL6 Cl 0.26360(5) -0.02760(6) 0.06117(5) 0.0418(2) Uani 1 1 d . . . . .
CL3 Cl 0.51732(8) 0.39663(7) 0.26552(7) 0.0748(4) Uani 1 1 d . . . . .
CL5 Cl 0.27018(8) 0.13531(7) 0.06041(7) 0.0687(4) Uani 1 1 d . . . . .
N1 N 0.55604(13) 0.81361(14) 0.19619(12) 0.0176(5) Uani 1 1 d . . . . .
N2 N 0.66951(13) 0.73774(14) 0.25441(12) 0.0167(5) Uani 1 1 d . . . . .
N3 N 0.61890(13) 0.85698(13) 0.31522(12) 0.0152(5) Uani 1 1 d . . . . .
C43 C 0.56904(15) 0.88497(16) 0.36139(15) 0.0166(6) Uani 1 1 d . . . . .
C16 C 0.36266(16) 0.78345(16) 0.25547(15) 0.0186(7) Uani 1 1 d . . . . .
C9 C 0.57505(16) 0.86218(17) 0.14460(14) 0.0182(6) Uani 1 1 d . . . . .
C52 C 0.42647(16) 0.86588(17) 0.40125(15) 0.0205(7) Uani 1 1 d . . . . .
C44 C 0.58655(16) 0.95645(17) 0.37858(15) 0.0199(6) Uani 1 1 d . . . . .
C30 C 0.72291(16) 0.74038(16) 0.20785(15) 0.0189(6) Uani 1 1 d . . . . .
C37 C 0.68155(15) 0.73065(17) 0.45222(15) 0.0171(6) Uani 1 1 d . . . . .
C23 C 0.76568(16) 0.68796(17) 0.30605(16) 0.0209(7) Uani 1 1 d . . . . .
C51 C 0.67100(16) 0.91041(16) 0.30823(14) 0.0170(6) Uani 1 1 d . . . . .
C32 C 0.67953(17) 0.53421(17) 0.37169(15) 0.0214(7) Uani 1 1 d . . . . .
H32 H 0.710185 0.549113 0.337078 0.026 Uiso 1 1 calc R U . . .
C46 C 0.65097(16) 0.97232(17) 0.34546(15) 0.0207(7) Uani 1 1 d . . . . .
C50 C 0.73572(16) 0.90647(17) 0.27801(15) 0.0202(7) Uani 1 1 d . . . . .
H50 H 0.750385 0.863169 0.255385 0.024 Uiso 1 1 calc R U . . .
C38 C 0.68153(17) 0.70299(18) 0.51826(16) 0.0226(7) Uani 1 1 d . . . . .
H38 H 0.658119 0.658164 0.527718 0.027 Uiso 1 1 calc R U . . .
C31 C 0.63877(15) 0.58629(16) 0.40431(14) 0.0156(6) Uani 1 1 d . . . . .
C21 C 0.33833(18) 0.84056(19) 0.21478(16) 0.0260(7) Uani 1 1 d . . . . .
H21 H 0.366188 0.858389 0.179103 0.031 Uiso 1 1 calc R U . . .
C63 C 0.50519(17) 0.74034(18) 0.51424(16) 0.0220(7) Uani 1 1 d . . . . .
H63 H 0.480784 0.704423 0.488161 0.026 Uiso 1 1 calc R U . . .
C8 C 0.63094(16) 0.91071(17) 0.13985(15) 0.0216(7) Uani 1 1 d . . . . .
H8 H 0.664998 0.914504 0.175114 0.026 Uiso 1 1 calc R U . . .
C1 C 0.48965(17) 0.78281(17) 0.17681(15) 0.0200(7) Uani 1 1 d . . . . .
C35 C 0.59075(16) 0.48962(18) 0.47293(16) 0.0218(7) Uani 1 1 d . . . . .
H35 H 0.560663 0.474299 0.507857 0.026 Uiso 1 1 calc R U . . .
C36 C 0.59371(16) 0.56324(17) 0.45468(15) 0.0197(6) Uani 1 1 d . . . . .
H36 H 0.564941 0.598146 0.476565 0.024 Uiso 1 1 calc R U . . .
C57 C 0.38129(17) 0.8492(2) 0.45336(17) 0.0309(8) Uani 1 1 d . . . . .
H57 H 0.391869 0.809502 0.483059 0.037 Uiso 1 1 calc R U . . .
C58 C 0.53096(16) 0.80324(17) 0.48343(15) 0.0178(6) Uani 1 1 d . . . . .
C53 C 0.40941(19) 0.92327(19) 0.35779(19) 0.0313(8) Uani 1 1 d . . . . .
H53 H 0.438464 0.934712 0.320858 0.038 Uiso 1 1 calc R U . . .
C22 C 0.69665(16) 0.70168(16) 0.31360(15) 0.0174(6) Uani 1 1 d . . . . .
C10 C 0.41060(16) 0.64971(17) 0.19734(15) 0.0207(7) Uani 1 1 d . . . . .
C42 C 0.71716(17) 0.79580(18) 0.43980(17) 0.0232(7) Uani 1 1 d . . . . .
H42 H 0.718190 0.814978 0.395164 0.028 Uiso 1 1 calc R U . . .
C25 C 0.78326(17) 0.71200(16) 0.23925(17) 0.0219(7) Uani 1 1 d . . . . .
C62 C 0.51531(18) 0.7301(2) 0.58367(16) 0.0282(8) Uani 1 1 d . . . . .
H62 H 0.497744 0.687126 0.604752 0.034 Uiso 1 1 calc R U . . .
C34 C 0.63139(17) 0.43876(17) 0.44046(16) 0.0234(7) Uani 1 1 d . . . . .
H34 H 0.629224 0.388319 0.452979 0.028 Uiso 1 1 calc R U . . .
C4 C 0.52412(17) 0.85736(19) 0.09304(16) 0.0236(7) Uani 1 1 d . . . . .
C17 C 0.32300(17) 0.76145(19) 0.31032(16) 0.0246(7) Uani 1 1 d . . . . .
H17 H 0.340711 0.725251 0.340729 0.030 Uiso 1 1 calc R U . . .
C15 C 0.35573(18) 0.60938(18) 0.22430(17) 0.0268(7) Uani 1 1 d . . . . .
H15 H 0.333242 0.626706 0.263627 0.032 Uiso 1 1 calc R U . . .
C2 C 0.47116(18) 0.8074(2) 0.11358(16) 0.0258(7) Uani 1 1 d . . . . .
C49 C 0.77786(18) 0.96801(18) 0.28217(16) 0.0253(7) Uani 1 1 d . . . . .
H49 H 0.822378 0.966711 0.261934 0.030 Uiso 1 1 calc R U . . .
C14 C 0.3340(2) 0.5449(2) 0.19448(19) 0.0358(9) Uani 1 1 d . . . . .
H14 H 0.297265 0.517378 0.213769 0.043 Uiso 1 1 calc R U . . .
C40 C 0.74998(18) 0.8061(2) 0.55696(18) 0.0303(8) Uani 1 1 d . . . . .
H40 H 0.772646 0.832137 0.592702 0.036 Uiso 1 1 calc R U . . .
C33 C 0.67532(17) 0.46069(17) 0.38976(16) 0.0242(7) Uani 1 1 d . . . . .
H33 H 0.702803 0.425172 0.367154 0.029 Uiso 1 1 calc R U . . .
C59 C 0.56830(17) 0.85492(18) 0.52164(15) 0.0223(7) Uani 1 1 d . . . . .
H59 H 0.587014 0.897504 0.500785 0.027 Uiso 1 1 calc R U . . .
C20 C 0.27392(18) 0.8715(2) 0.22592(18) 0.0300(8) Uani 1 1 d . . . . .
H20 H 0.257401 0.910192 0.197571 0.036 Uiso 1 1 calc R U . . .
C39 C 0.71567(19) 0.7410(2) 0.56993(17) 0.0306(8) Uani 1 1 d . . . . .
H39 H 0.715412 0.721938 0.614646 0.037 Uiso 1 1 calc R U . . .
C29 C 0.72170(19) 0.76189(18) 0.13977(17) 0.0262(7) Uani 1 1 d . . . . .
H29 H 0.680144 0.778917 0.118148 0.031 Uiso 1 1 calc R U . . .
C48 C 0.75720(18) 1.03163(19) 0.31497(17) 0.0294(8) Uani 1 1 d . . . . .
H48 H 0.786493 1.073798 0.314568 0.035 Uiso 1 1 calc R U . . .
C18 C 0.25811(19) 0.79200(19) 0.32067(18) 0.0300(8) Uani 1 1 d . . . . .
H18 H 0.230521 0.775507 0.357077 0.036 Uiso 1 1 calc R U . . .
C19 C 0.23347(19) 0.8466(2) 0.27791(18) 0.0316(8) Uani 1 1 d . . . . .
H19 H 0.188507 0.867047 0.284420 0.038 Uiso 1 1 calc R U . . .
C47 C 0.69451(19) 1.03449(18) 0.34825(17) 0.0286(8) Uani 1 1 d . . . . .
H47 H 0.681235 1.077334 0.372372 0.034 Uiso 1 1 calc R U . . .
C41 C 0.75122(18) 0.8331(2) 0.49197(18) 0.0298(8) Uani 1 1 d . . . . .
H41 H 0.775483 0.877538 0.482789 0.036 Uiso 1 1 calc R U . . .
C24 C 0.81537(18) 0.6542(2) 0.35567(19) 0.0333(8) Uani 1 1 d . . . . .
H24A H 0.790605 0.641326 0.396918 0.050 Uiso 1 1 calc R U . . .
H24B H 0.852594 0.689400 0.366640 0.050 Uiso 1 1 calc R U . . .
H24C H 0.835618 0.609659 0.336114 0.050 Uiso 1 1 calc R U . . .
C45 C 0.54973(19) 1.00955(18) 0.42256(18) 0.0289(8) Uani 1 1 d . . . . .
H45A H 0.506938 0.986899 0.439122 0.043 Uiso 1 1 calc R U . . .
H45B H 0.537937 1.053884 0.396546 0.043 Uiso 1 1 calc R U . . .
H45C H 0.580047 1.022878 0.461018 0.043 Uiso 1 1 calc R U . . .
C61 C 0.5504(2) 0.7817(2) 0.62153(17) 0.0317(8) Uani 1 1 d . . . . .
H61 H 0.555970 0.775227 0.668962 0.038 Uiso 1 1 calc R U . . .
C13 C 0.3655(2) 0.5199(2) 0.1363(2) 0.0402(9) Uani 1 1 d . . . . .
H13 H 0.350346 0.475303 0.115594 0.048 Uiso 1 1 calc R U . . .
C7 C 0.63521(19) 0.95326(19) 0.08197(17) 0.0281(8) Uani 1 1 d . . . . .
H7 H 0.673088 0.986471 0.077443 0.034 Uiso 1 1 calc R U . . .
C11 C 0.4414(2) 0.6240(2) 0.13919(18) 0.0344(8) Uani 1 1 d . . . . .
H11 H 0.478698 0.650693 0.119815 0.041 Uiso 1 1 calc R U . . .
C60 C 0.57776(19) 0.8433(2) 0.59057(17) 0.0311(8) Uani 1 1 d . . . . .
H60 H 0.603378 0.878128 0.616811 0.037 Uiso 1 1 calc R U . . .
C5 C 0.52995(19) 0.9013(2) 0.03462(17) 0.0302(8) Uani 1 1 d . . . . .
H5 H 0.496180 0.898161 -0.000947 0.036 Uiso 1 1 calc R U . . .
C54 C 0.3486(2) 0.9643(2) 0.3691(2) 0.0454(11) Uani 1 1 d . . . . .
H54 H 0.337095 1.004271 0.339969 0.054 Uiso 1 1 calc R U . . .
C6 C 0.58524(19) 0.9484(2) 0.03027(17) 0.0319(8) Uani 1 1 d . . . . .
H6 H 0.589631 0.978483 -0.008730 0.038 Uiso 1 1 calc R U . . .
C28 C 0.7832(2) 0.75721(19) 0.10589(18) 0.0316(8) Uani 1 1 d . . . . .
H28 H 0.784015 0.771538 0.059733 0.038 Uiso 1 1 calc R U . . .
C56 C 0.3210(2) 0.8899(3) 0.4624(2) 0.0467(12) Uani 1 1 d . . . . .
H56 H 0.290141 0.877477 0.497650 0.056 Uiso 1 1 calc R U . . .
C12 C 0.4180(2) 0.5593(2) 0.1091(2) 0.0445(10) Uani 1 1 d . . . . .
H12 H 0.439081 0.542391 0.068894 0.053 Uiso 1 1 calc R U . . .
C64 C 0.4725(2) 0.4638(2) 0.3115(2) 0.0361(9) Uani 1 1 d . . . . .
H64A H 0.461409 0.506033 0.281539 0.043 Uiso 1 1 calc R U . . .
H64B H 0.502986 0.481947 0.348841 0.043 Uiso 1 1 calc R U . . .
C27 C 0.8449(2) 0.7320(2) 0.13702(19) 0.0332(8) Uani 1 1 d . . . . .
H27 H 0.886823 0.730546 0.112146 0.040 Uiso 1 1 calc R U . . .
C3 C 0.4089(2) 0.7882(2) 0.07052(18) 0.0361(9) Uani 1 1 d . . . . .
H3A H 0.376732 0.758083 0.096707 0.054 Uiso 1 1 calc R U . . .
H3B H 0.423929 0.760448 0.030866 0.054 Uiso 1 1 calc R U . . .
H3C H 0.385341 0.833440 0.055769 0.054 Uiso 1 1 calc R U . . .
C26 C 0.84520(18) 0.70955(18) 0.20277(19) 0.0289(8) Uani 1 1 d . . . . .
H26 H 0.887057 0.692370 0.223725 0.035 Uiso 1 1 calc R U . . .
C55 C 0.3061(2) 0.9477(3) 0.4208(2) 0.0514(12) Uani 1 1 d . . . . .
H55 H 0.265669 0.976627 0.428181 0.062 Uiso 1 1 calc R U . . .
C65 C 0.2304(2) 0.0565(2) 0.0923(2) 0.0465(10) Uani 1 1 d . . . . .
H65A H 0.179903 0.058842 0.081434 0.056 Uiso 1 1 calc R U . . .
H65B H 0.235817 0.056704 0.142164 0.056 Uiso 1 1 calc R U . . .
 
loop_
 _atom_site_aniso_label
 _atom_site_aniso_U_11
 _atom_site_aniso_U_22
 _atom_site_aniso_U_33
 _atom_site_aniso_U_23
 _atom_site_aniso_U_13
 _atom_site_aniso_U_12
RU1 0.01126(15) 0.01311(15) 0.01348(14) 0.00163(8) 0.00183(10) -0.00043(8)
CL1 0.0174(4) 0.0207(4) 0.0223(4) 0.0069(3) 0.0022(3) -0.0037(3)
CL2 0.0205(4) 0.0183(4) 0.0209(4) -0.0037(3) 0.0020(3) -0.0003(3)
P4 0.0125(4) 0.0146(4) 0.0131(4) 0.0005(3) 0.0009(3) -0.0004(3)
P1 0.0134(4) 0.0202(4) 0.0174(4) 0.0029(3) -0.0004(3) -0.0033(3)
P3 0.0135(4) 0.0162(4) 0.0151(4) 0.0007(3) 0.0020(3) 0.0013(3)
P2 0.0127(4) 0.0151(4) 0.0149(4) 0.0017(3) 0.0018(3) 0.0015(3)
CL4 0.0311(5) 0.0379(5) 0.0514(6) 0.0107(4) 0.0023(4) -0.0063(4)
CL6 0.0426(6) 0.0407(5) 0.0424(5) 0.0070(4) 0.0117(4) -0.0006(4)
CL3 0.1047(11) 0.0427(6) 0.0789(9) 0.0037(6) 0.0569(8) 0.0115(7)
CL5 0.0819(10) 0.0513(7) 0.0730(8) -0.0061(6) 0.0059(7) -0.0038(6)
N1 0.0164(13) 0.0213(13) 0.0150(12) 0.0043(10) 0.0001(10) -0.0039(11)
N2 0.0137(13) 0.0177(13) 0.0189(13) 0.0009(10) 0.0035(10) 0.0008(10)
N3 0.0135(13) 0.0153(12) 0.0168(12) 0.0006(10) 0.0010(10) -0.0017(10)
C43 0.0137(15) 0.0174(15) 0.0188(14) -0.0006(12) 0.0017(12) 0.0019(12)
C16 0.0142(16) 0.0219(16) 0.0197(15) 0.0004(12) -0.0036(12) -0.0018(12)
C9 0.0191(16) 0.0199(15) 0.0156(14) 0.0051(12) 0.0025(12) 0.0007(13)
C52 0.0175(16) 0.0223(16) 0.0213(15) -0.0046(12) -0.0039(12) 0.0033(13)
C44 0.0197(16) 0.0184(15) 0.0215(15) 0.0002(12) -0.0004(12) 0.0007(13)
C30 0.0192(16) 0.0143(15) 0.0236(16) -0.0014(12) 0.0099(13) -0.0035(12)
C37 0.0112(15) 0.0195(15) 0.0204(15) -0.0013(12) -0.0015(12) 0.0045(12)
C23 0.0150(16) 0.0200(16) 0.0278(16) -0.0014(13) 0.0031(13) -0.0012(13)
C51 0.0177(16) 0.0167(15) 0.0164(14) 0.0035(11) -0.0022(12) -0.0030(12)
C32 0.0226(17) 0.0218(16) 0.0199(15) 0.0035(12) 0.0044(13) 0.0022(13)
C46 0.0211(17) 0.0179(15) 0.0229(16) 0.0031(12) -0.0023(13) -0.0033(13)
C50 0.0207(17) 0.0205(16) 0.0195(15) 0.0024(12) 0.0006(12) -0.0041(13)
C38 0.0237(18) 0.0209(16) 0.0233(16) 0.0004(13) 0.0004(13) 0.0070(13)
C31 0.0128(15) 0.0177(15) 0.0162(14) 0.0010(11) -0.0025(11) 0.0003(12)
C21 0.0270(19) 0.0278(18) 0.0231(16) 0.0043(13) -0.0028(14) -0.0019(14)
C63 0.0200(16) 0.0244(17) 0.0217(16) 0.0027(13) 0.0031(13) 0.0069(13)
C8 0.0184(16) 0.0260(17) 0.0202(15) 0.0039(13) 0.0009(13) -0.0025(13)
C1 0.0166(16) 0.0251(17) 0.0182(16) 0.0019(12) -0.0028(12) -0.0041(13)
C35 0.0150(15) 0.0258(17) 0.0246(16) 0.0077(13) 0.0008(12) -0.0030(13)
C36 0.0146(16) 0.0248(17) 0.0197(15) 0.0013(12) -0.0007(12) 0.0016(13)
C57 0.0152(17) 0.051(2) 0.0268(17) -0.0044(16) 0.0028(14) 0.0065(15)
C58 0.0149(15) 0.0226(16) 0.0160(14) -0.0002(12) 0.0035(12) 0.0088(12)
C53 0.0286(19) 0.0243(18) 0.041(2) 0.0017(15) -0.0097(16) -0.0005(15)
C22 0.0209(17) 0.0153(14) 0.0161(15) 0.0008(11) 0.0021(12) 0.0002(12)
C10 0.0169(16) 0.0212(16) 0.0236(16) 0.0028(13) -0.0077(12) -0.0029(13)
C42 0.0203(17) 0.0248(17) 0.0244(17) 0.0009(13) -0.0029(14) 0.0013(13)
C25 0.0196(17) 0.0168(16) 0.0295(18) -0.0003(12) 0.0054(14) 0.0007(12)
C62 0.0273(19) 0.0365(19) 0.0211(17) 0.0104(15) 0.0071(14) 0.0091(15)
C34 0.0259(18) 0.0146(15) 0.0296(17) 0.0053(13) -0.0027(14) 0.0003(13)
C4 0.0172(16) 0.0325(18) 0.0210(16) 0.0062(14) 0.0000(13) -0.0025(14)
C17 0.0211(17) 0.0277(18) 0.0251(17) 0.0076(14) -0.0026(13) -0.0026(14)
C15 0.0299(19) 0.0248(17) 0.0257(17) 0.0033(13) -0.0025(14) -0.0050(15)
C2 0.0231(18) 0.0341(19) 0.0202(16) 0.0062(14) -0.0012(13) -0.0047(15)
C49 0.0215(17) 0.0294(18) 0.0250(16) 0.0039(14) -0.0003(13) -0.0073(14)
C14 0.033(2) 0.030(2) 0.045(2) 0.0062(16) -0.0082(17) -0.0117(16)
C40 0.0221(18) 0.036(2) 0.0323(19) -0.0116(16) -0.0109(15) 0.0080(15)
C33 0.0272(18) 0.0185(16) 0.0269(17) -0.0038(13) 0.0030(14) 0.0051(14)
C59 0.0219(17) 0.0240(17) 0.0208(15) -0.0003(13) -0.0022(13) 0.0089(14)
C20 0.0277(19) 0.0309(19) 0.0312(18) 0.0044(15) -0.0065(15) 0.0108(15)
C39 0.0275(19) 0.041(2) 0.0235(17) 0.0001(15) -0.0065(14) 0.0130(16)
C29 0.0294(19) 0.0243(17) 0.0250(17) 0.0026(14) 0.0073(14) -0.0004(14)
C48 0.031(2) 0.0224(17) 0.0347(19) 0.0030(14) 0.0002(15) -0.0142(15)
C18 0.0228(19) 0.035(2) 0.0323(19) 0.0053(15) 0.0063(15) 0.0059(15)
C19 0.0235(18) 0.035(2) 0.0366(19) -0.0012(16) 0.0003(15) 0.0091(15)
C47 0.034(2) 0.0160(16) 0.0356(19) 0.0001(14) 0.0006(15) -0.0037(14)
C41 0.0215(18) 0.0280(18) 0.040(2) -0.0035(15) -0.0052(15) -0.0035(14)
C24 0.0203(18) 0.038(2) 0.041(2) 0.0082(17) 0.0004(15) 0.0052(16)
C45 0.0319(19) 0.0192(17) 0.0357(19) -0.0058(14) 0.0050(15) -0.0001(14)
C61 0.032(2) 0.046(2) 0.0180(16) 0.0021(15) -0.0006(15) 0.0142(16)
C13 0.039(2) 0.030(2) 0.051(2) -0.0115(18) -0.0157(19) -0.0050(17)
C7 0.0280(19) 0.0287(18) 0.0277(17) 0.0060(14) 0.0052(14) -0.0054(15)
C11 0.029(2) 0.043(2) 0.0315(19) -0.0102(16) 0.0022(15) -0.0075(17)
C60 0.0280(19) 0.036(2) 0.0292(18) -0.0076(15) -0.0069(15) 0.0124(16)
C5 0.0281(19) 0.042(2) 0.0199(16) 0.0109(15) -0.0049(14) -0.0028(16)
C54 0.035(2) 0.025(2) 0.075(3) -0.0038(19) -0.025(2) 0.0119(17)
C6 0.032(2) 0.043(2) 0.0207(16) 0.0167(15) 0.0050(14) -0.0007(16)
C28 0.041(2) 0.0263(18) 0.0280(18) 0.0019(14) 0.0200(16) -0.0014(16)
C56 0.022(2) 0.083(3) 0.035(2) -0.025(2) -0.0032(16) 0.014(2)
C12 0.043(2) 0.051(3) 0.039(2) -0.0241(19) 0.0010(18) -0.007(2)
C64 0.033(2) 0.032(2) 0.044(2) -0.0022(17) 0.0047(17) -0.0015(16)
C27 0.029(2) 0.0313(19) 0.040(2) -0.0022(16) 0.0201(16) -0.0049(16)
C3 0.026(2) 0.057(3) 0.0247(18) 0.0121(16) -0.0090(15) -0.0137(17)
C26 0.0190(18) 0.0268(18) 0.041(2) -0.0028(15) 0.0079(15) 0.0000(14)
C55 0.023(2) 0.065(3) 0.066(3) -0.035(2) -0.011(2) 0.023(2)
C65 0.042(2) 0.046(3) 0.051(2) -0.001(2) -0.004(2) 0.004(2)
 
_geom_special_details
;
 All esds (except the esd in the dihedral angle between two l.s. planes)
 are estimated using the full covariance matrix.  The cell esds are taken
 into account individually in the estimation of esds in distances, angles
 and torsion angles; correlations between esds in cell parameters are only
 used when they are defined by crystal symmetry.  An approximate (isotropic)
 treatment of cell esds is used for estimating esds involving l.s. planes.
;
 
loop_
 _geom_bond_atom_site_label_1
 _geom_bond_atom_site_label_2
 _geom_bond_distance
 _geom_bond_site_symmetry_2
 _geom_bond_publ_flag
RU1 P4 2.1363(8) . ?
RU1 P3 2.2913(8) . ?
RU1 P1 2.3295(8) . ?
RU1 P2 2.4079(8) . ?
RU1 CL2 2.4705(7) . ?
RU1 CL1 2.4829(7) . ?
P4 N3 1.702(2) . ?
P4 N2 1.706(3) . ?
P4 N1 1.709(3) . ?
P1 C1 1.817(3) . ?
P1 C16 1.835(3) . ?
P1 C10 1.835(3) . ?
P3 C43 1.827(3) . ?
P3 C52 1.831(3) . ?
P3 C58 1.847(3) . ?
P2 C31 1.823(3) . ?
P2 C22 1.834(3) . ?
P2 C37 1.849(3) . ?
CL4 C64 1.761(4) . ?
CL6 C65 1.769(4) . ?
CL3 C64 1.756(4) . ?
CL5 C65 1.746(5) . ?
N1 C9 1.402(4) . ?
N1 C1 1.437(4) . ?
N2 C30 1.391(4) . ?
N2 C22 1.432(4) . ?
N3 C51 1.402(4) . ?
N3 C43 1.428(4) . ?
C43 C44 1.382(4) . ?
C16 C21 1.389(4) . ?
C16 C17 1.395(4) . ?
C9 C8 1.393(4) . ?
C9 C4 1.403(4) . ?
C52 C53 1.387(5) . ?
C52 C57 1.392(5) . ?
C44 C46 1.439(4) . ?
C44 C45 1.486(4) . ?
C30 C29 1.402(4) . ?
C30 C25 1.402(5) . ?
C37 C42 1.390(5) . ?
C37 C38 1.400(4) . ?
C23 C22 1.359(4) . ?
C23 C25 1.438(5) . ?
C23 C24 1.488(5) . ?
C51 C50 1.389(4) . ?
C51 C46 1.402(4) . ?
C32 C33 1.385(4) . ?
C32 C31 1.393(4) . ?
C32 H32 0.9500 . ?
C46 C47 1.405(5) . ?
C50 C49 1.381(5) . ?
C50 H50 0.9500 . ?
C38 C39 1.388(5) . ?
C38 H38 0.9500 . ?
C31 C36 1.395(4) . ?
C21 C20 1.379(5) . ?
C21 H21 0.9500 . ?
C63 C58 1.390(5) . ?
C63 C62 1.396(4) . ?
C63 H63 0.9500 . ?
C8 C7 1.385(4) . ?
C8 H8 0.9500 . ?
C1 C2 1.370(4) . ?
C35 C34 1.375(5) . ?
C35 C36 1.386(4) . ?
C35 H35 0.9500 . ?
C36 H36 0.9500 . ?
C57 C56 1.387(5) . ?
C57 H57 0.9500 . ?
C58 C59 1.395(5) . ?
C53 C54 1.406(5) . ?
C53 H53 0.9500 . ?
C10 C11 1.384(5) . ?
C10 C15 1.396(5) . ?
C42 C41 1.389(5) . ?
C42 H42 0.9500 . ?
C25 C26 1.402(5) . ?
C62 C61 1.369(5) . ?
C62 H62 0.9500 . ?
C34 C33 1.380(5) . ?
C34 H34 0.9500 . ?
C4 C5 1.411(4) . ?
C4 C2 1.426(5) . ?
C17 C18 1.382(5) . ?
C17 H17 0.9500 . ?
C15 C14 1.373(5) . ?
C15 H15 0.9500 . ?
C2 C3 1.496(5) . ?
C49 C48 1.387(5) . ?
C49 H49 0.9500 . ?
C14 C13 1.387(6) . ?
C14 H14 0.9500 . ?
C40 C41 1.377(5) . ?
C40 C39 1.380(5) . ?
C40 H40 0.9500 . ?
C33 H33 0.9500 . ?
C59 C60 1.389(5) . ?
C59 H59 0.9500 . ?
C20 C19 1.376(5) . ?
C20 H20 0.9500 . ?
C39 H39 0.9500 . ?
C29 C28 1.370(5) . ?
C29 H29 0.9500 . ?
C48 C47 1.382(5) . ?
C48 H48 0.9500 . ?
C18 C19 1.382(5) . ?
C18 H18 0.9500 . ?
C19 H19 0.9500 . ?
C47 H47 0.9500 . ?
C41 H41 0.9500 . ?
C24 H24A 0.9800 . ?
C24 H24B 0.9800 . ?
C24 H24C 0.9800 . ?
C45 H45A 0.9800 . ?
C45 H45B 0.9800 . ?
C45 H45C 0.9800 . ?
C61 C60 1.383(5) . ?
C61 H61 0.9500 . ?
C13 C12 1.355(6) . ?
C13 H13 0.9500 . ?
C7 C6 1.392(5) . ?
C7 H7 0.9500 . ?
C11 C12 1.389(5) . ?
C11 H11 0.9500 . ?
C60 H60 0.9500 . ?
C5 C6 1.367(5) . ?
C5 H5 0.9500 . ?
C54 C55 1.354(7) . ?
C54 H54 0.9500 . ?
C6 H6 0.9500 . ?
C28 C27 1.403(6) . ?
C28 H28 0.9500 . ?
C56 C55 1.361(7) . ?
C56 H56 0.9500 . ?
C12 H12 0.9500 . ?
C64 H64A 0.9900 . ?
C64 H64B 0.9900 . ?
C27 C26 1.363(5) . ?
C27 H27 0.9500 . ?
C3 H3A 0.9800 . ?
C3 H3B 0.9800 . ?
C3 H3C 0.9800 . ?
C26 H26 0.9500 . ?
C55 H55 0.9500 . ?
C65 H65A 0.9900 . ?
C65 H65B 0.9900 . ?
 
loop_
 _geom_angle_atom_site_label_1
 _geom_angle_atom_site_label_2
 _geom_angle_atom_site_label_3
 _geom_angle
 _geom_angle_site_symmetry_1
 _geom_angle_site_symmetry_3
 _geom_angle_publ_flag
P4 RU1 P3 85.62(3) . . ?
P4 RU1 P1 86.13(3) . . ?
P3 RU1 P1 101.30(3) . . ?
P4 RU1 P2 80.63(3) . . ?
P3 RU1 P2 93.60(3) . . ?
P1 RU1 P2 159.24(3) . . ?
P4 RU1 CL2 88.63(3) . . ?
P3 RU1 CL2 171.95(3) . . ?
P1 RU1 CL2 83.90(3) . . ?
P2 RU1 CL2 79.88(3) . . ?
P4 RU1 CL1 175.61(3) . . ?
P3 RU1 CL1 97.05(3) . . ?
P1 RU1 CL1 89.92(3) . . ?
P2 RU1 CL1 102.60(3) . . ?
CL2 RU1 CL1 89.04(3) . . ?
N3 P4 N2 103.09(12) . . ?
N3 P4 N1 107.03(12) . . ?
N2 P4 N1 110.53(12) . . ?
N3 P4 RU1 110.99(8) . . ?
N2 P4 RU1 110.64(9) . . ?
N1 P4 RU1 113.96(9) . . ?
C1 P1 C16 105.90(15) . . ?
C1 P1 C10 104.45(14) . . ?
C16 P1 C10 101.77(14) . . ?
C1 P1 RU1 104.74(11) . . ?
C16 P1 RU1 121.59(10) . . ?
C10 P1 RU1 116.83(10) . . ?
C43 P3 C52 103.94(14) . . ?
C43 P3 C58 106.22(14) . . ?
C52 P3 C58 99.18(13) . . ?
C43 P3 RU1 105.48(10) . . ?
C52 P3 RU1 125.78(10) . . ?
C58 P3 RU1 114.55(10) . . ?
C31 P2 C22 109.48(13) . . ?
C31 P2 C37 104.39(13) . . ?
C22 P2 C37 99.60(14) . . ?
C31 P2 RU1 110.79(10) . . ?
C22 P2 RU1 101.47(10) . . ?
C37 P2 RU1 129.45(10) . . ?
C9 N1 C1 106.9(2) . . ?
C9 N1 P4 136.4(2) . . ?
C1 N1 P4 116.6(2) . . ?
C30 N2 C22 107.2(2) . . ?
C30 N2 P4 138.5(2) . . ?
C22 N2 P4 111.73(19) . . ?
C51 N3 C43 107.7(2) . . ?
C51 N3 P4 134.8(2) . . ?
C43 N3 P4 115.44(19) . . ?
C44 C43 N3 109.2(3) . . ?
C44 C43 P3 135.6(2) . . ?
N3 C43 P3 114.2(2) . . ?
C21 C16 C17 118.9(3) . . ?
C21 C16 P1 124.5(2) . . ?
C17 C16 P1 116.6(2) . . ?
C8 C9 N1 131.1(3) . . ?
C8 C9 C4 121.2(3) . . ?
N1 C9 C4 107.7(3) . . ?
C53 C52 C57 118.7(3) . . ?
C53 C52 P3 120.8(3) . . ?
C57 C52 P3 120.5(3) . . ?
C43 C44 C46 106.4(3) . . ?
C43 C44 C45 129.6(3) . . ?
C46 C44 C45 123.9(3) . . ?
N2 C30 C29 130.2(3) . . ?
N2 C30 C25 107.8(3) . . ?
C29 C30 C25 121.8(3) . . ?
C42 C37 C38 118.6(3) . . ?
C42 C37 P2 119.4(2) . . ?
C38 C37 P2 122.0(2) . . ?
C22 C23 C25 106.9(3) . . ?
C22 C23 C24 128.1(3) . . ?
C25 C23 C24 125.0(3) . . ?
C50 C51 C46 121.5(3) . . ?
C50 C51 N3 130.6(3) . . ?
C46 C51 N3 107.5(3) . . ?
C33 C32 C31 119.9(3) . . ?
C33 C32 H32 120.0 . . ?
C31 C32 H32 120.0 . . ?
C51 C46 C47 119.8(3) . . ?
C51 C46 C44 108.9(3) . . ?
C47 C46 C44 131.2(3) . . ?
C49 C50 C51 117.4(3) . . ?
C49 C50 H50 121.3 . . ?
C51 C50 H50 121.3 . . ?
C39 C38 C37 120.1(3) . . ?
C39 C38 H38 120.0 . . ?
C37 C38 H38 120.0 . . ?
C32 C31 C36 119.2(3) . . ?
C32 C31 P2 124.2(2) . . ?
C36 C31 P2 116.5(2) . . ?
C20 C21 C16 120.3(3) . . ?
C20 C21 H21 119.8 . . ?
C16 C21 H21 119.8 . . ?
C58 C63 C62 119.8(3) . . ?
C58 C63 H63 120.1 . . ?
C62 C63 H63 120.1 . . ?
C7 C8 C9 117.7(3) . . ?
C7 C8 H8 121.1 . . ?
C9 C8 H8 121.1 . . ?
C2 C1 N1 109.3(3) . . ?
C2 C1 P1 133.2(3) . . ?
N1 C1 P1 116.9(2) . . ?
C34 C35 C36 120.0(3) . . ?
C34 C35 H35 120.0 . . ?
C36 C35 H35 120.0 . . ?
C35 C36 C31 120.3(3) . . ?
C35 C36 H36 119.9 . . ?
C31 C36 H36 119.9 . . ?
C52 C57 C56 120.8(4) . . ?
C52 C57 H57 119.6 . . ?
C56 C57 H57 119.6 . . ?
C63 C58 C59 119.9(3) . . ?
C63 C58 P3 116.6(2) . . ?
C59 C58 P3 123.4(2) . . ?
C52 C53 C54 119.2(4) . . ?
C52 C53 H53 120.4 . . ?
C54 C53 H53 120.4 . . ?
C23 C22 N2 109.6(3) . . ?
C23 C22 P2 133.4(2) . . ?
N2 C22 P2 117.0(2) . . ?
C11 C10 C15 118.5(3) . . ?
C11 C10 P1 121.3(3) . . ?
C15 C10 P1 120.1(2) . . ?
C41 C42 C37 120.7(3) . . ?
C41 C42 H42 119.7 . . ?
C37 C42 H42 119.7 . . ?
C26 C25 C30 119.0(3) . . ?
C26 C25 C23 132.7(3) . . ?
C30 C25 C23 108.3(3) . . ?
C61 C62 C63 120.4(3) . . ?
C61 C62 H62 119.8 . . ?
C63 C62 H62 119.8 . . ?
C35 C34 C33 120.3(3) . . ?
C35 C34 H34 119.9 . . ?
C33 C34 H34 119.9 . . ?
C9 C4 C5 119.8(3) . . ?
C9 C4 C2 108.8(3) . . ?
C5 C4 C2 131.3(3) . . ?
C18 C17 C16 120.4(3) . . ?
C18 C17 H17 119.8 . . ?
C16 C17 H17 119.8 . . ?
C14 C15 C10 120.6(3) . . ?
C14 C15 H15 119.7 . . ?
C10 C15 H15 119.7 . . ?
C1 C2 C4 107.1(3) . . ?
C1 C2 C3 129.4(3) . . ?
C4 C2 C3 123.5(3) . . ?
C50 C49 C48 122.0(3) . . ?
C50 C49 H49 119.0 . . ?
C48 C49 H49 119.0 . . ?
C15 C14 C13 120.2(3) . . ?
C15 C14 H14 119.9 . . ?
C13 C14 H14 119.9 . . ?
C41 C40 C39 119.7(3) . . ?
C41 C40 H40 120.1 . . ?
C39 C40 H40 120.1 . . ?
C34 C33 C32 120.3(3) . . ?
C34 C33 H33 119.8 . . ?
C32 C33 H33 119.8 . . ?
C60 C59 C58 119.1(3) . . ?
C60 C59 H59 120.4 . . ?
C58 C59 H59 120.4 . . ?
C21 C20 C19 120.3(3) . . ?
C21 C20 H20 119.8 . . ?
C19 C20 H20 119.8 . . ?
C40 C39 C38 120.6(3) . . ?
C40 C39 H39 119.7 . . ?
C38 C39 H39 119.7 . . ?
C28 C29 C30 116.9(3) . . ?
C28 C29 H29 121.5 . . ?
C30 C29 H29 121.5 . . ?
C47 C48 C49 120.8(3) . . ?
C47 C48 H48 119.6 . . ?
C49 C48 H48 119.6 . . ?
C19 C18 C17 119.8(3) . . ?
C19 C18 H18 120.1 . . ?
C17 C18 H18 120.1 . . ?
C20 C19 C18 120.1(3) . . ?
C20 C19 H19 119.9 . . ?
C18 C19 H19 119.9 . . ?
C48 C47 C46 118.2(3) . . ?
C48 C47 H47 120.9 . . ?
C46 C47 H47 120.9 . . ?
C40 C41 C42 120.3(3) . . ?
C40 C41 H41 119.9 . . ?
C42 C41 H41 119.9 . . ?
C23 C24 H24A 109.5 . . ?
C23 C24 H24B 109.5 . . ?
H24A C24 H24B 109.5 . . ?
C23 C24 H24C 109.5 . . ?
H24A C24 H24C 109.5 . . ?
H24B C24 H24C 109.5 . . ?
C44 C45 H45A 109.5 . . ?
C44 C45 H45B 109.5 . . ?
H45A C45 H45B 109.5 . . ?
C44 C45 H45C 109.5 . . ?
H45A C45 H45C 109.5 . . ?
H45B C45 H45C 109.5 . . ?
C62 C61 C60 119.8(3) . . ?
C62 C61 H61 120.1 . . ?
C60 C61 H61 120.1 . . ?
C12 C13 C14 119.6(3) . . ?
C12 C13 H13 120.2 . . ?
C14 C13 H13 120.2 . . ?
C8 C7 C6 121.5(3) . . ?
C8 C7 H7 119.2 . . ?
C6 C7 H7 119.2 . . ?
C10 C11 C12 120.1(3) . . ?
C10 C11 H11 119.9 . . ?
C12 C11 H11 119.9 . . ?
C61 C60 C59 120.9(3) . . ?
C61 C60 H60 119.5 . . ?
C59 C60 H60 119.5 . . ?
C6 C5 C4 118.6(3) . . ?
C6 C5 H5 120.7 . . ?
C4 C5 H5 120.7 . . ?
C55 C54 C53 121.0(4) . . ?
C55 C54 H54 119.5 . . ?
C53 C54 H54 119.5 . . ?
C5 C6 C7 121.2(3) . . ?
C5 C6 H6 119.4 . . ?
C7 C6 H6 119.4 . . ?
C29 C28 C27 122.2(3) . . ?
C29 C28 H28 118.9 . . ?
C27 C28 H28 118.9 . . ?
C55 C56 C57 120.0(4) . . ?
C55 C56 H56 120.0 . . ?
C57 C56 H56 120.0 . . ?
C13 C12 C11 121.0(4) . . ?
C13 C12 H12 119.5 . . ?
C11 C12 H12 119.5 . . ?
CL3 C64 CL4 111.8(2) . . ?
CL3 C64 H64A 109.3 . . ?
CL4 C64 H64A 109.3 . . ?
CL3 C64 H64B 109.3 . . ?
CL4 C64 H64B 109.3 . . ?
H64A C64 H64B 107.9 . . ?
C26 C27 C28 120.4(3) . . ?
C26 C27 H27 119.8 . . ?
C28 C27 H27 119.8 . . ?
C2 C3 H3A 109.5 . . ?
C2 C3 H3B 109.5 . . ?
H3A C3 H3B 109.5 . . ?
C2 C3 H3C 109.5 . . ?
H3A C3 H3C 109.5 . . ?
H3B C3 H3C 109.5 . . ?
C27 C26 C25 119.5(3) . . ?
C27 C26 H26 120.2 . . ?
C25 C26 H26 120.2 . . ?
C54 C55 C56 120.4(4) . . ?
C54 C55 H55 119.8 . . ?
C56 C55 H55 119.8 . . ?
CL5 C65 CL6 114.8(2) . . ?
CL5 C65 H65A 108.6 . . ?
CL6 C65 H65A 108.6 . . ?
CL5 C65 H65B 108.6 . . ?
CL6 C65 H65B 108.6 . . ?
H65A C65 H65B 107.5 . . ?
 
_refine_diff_density_max    3.100
_refine_diff_density_min   -1.157
_refine_diff_density_rms    0.084

_shelx_res_file
;

TITL FF400_0m_a.res in P2(1)/n
 ff400_0m_a_sq.res created by SHELXL-2016/3 at 17:40:01 on 13-Jul-2016
CELL  0.71073  19.1879  18.1604  19.7879   90.000   91.012   90.000
ZERR    4.000   0.0009   0.0008   0.0009    0.000    0.002    0.000
LATT 1
SYMM 1/2-X, 1/2+Y, 1/2-Z
SFAC C  H  N  P  Cl Ru
UNIT 260 220 12 16 24 4
LIST 6 ! automatically inserted. Change 6 to 4 for CHECKCIF!!
LIST 6 ! automatically inserted. Change 6 to 4 for CHECKCIF!!
LIST 4 ! automatically inserted. Change 6 to 4 for CHECKCIF!!
L.S. 5 0  142
BOND $H
FMAP 2
PLAN 20
ACTA
OMIT -5   1   6
OMIT -5   2   8
OMIT -3   6   3
OMIT 4   3   4
TEMP -123.150
ABIN
WGHT    0.100000
FVAR       0.19940
RU1   6    0.525672    0.713483    0.327502    11.00000    0.01126    0.01311 =
         0.01348    0.00163    0.00183   -0.00043
CL1   5    0.442788    0.631478    0.386268    11.00000    0.01736    0.02072 =
         0.02228    0.00689    0.00223   -0.00366
CL2   5    0.561516    0.607796    0.257604    11.00000    0.02052    0.01825 =
         0.02093   -0.00367    0.00196   -0.00034
P4    4    0.592955    0.781907    0.269860    11.00000    0.01252    0.01457 =
         0.01307    0.00050    0.00089   -0.00039
P1    4    0.443396    0.732037    0.241204    11.00000    0.01342    0.02024 =
         0.01743    0.00290   -0.00044   -0.00329
P3    4    0.508697    0.815762    0.392983    11.00000    0.01352    0.01619 =
         0.01511    0.00066    0.00197    0.00132
P2    4    0.635386    0.683570    0.381717    11.00000    0.01270    0.01514 =
         0.01489    0.00168    0.00178    0.00151
CL4   5    0.394869    0.428936    0.345129    11.00000    0.03106    0.03794 =
         0.05139    0.01066    0.00225   -0.00633
CL6   5    0.263596   -0.027599    0.061173    11.00000    0.04263    0.04074 =
         0.04242    0.00699    0.01171   -0.00056
CL3   5    0.517321    0.396629    0.265516    11.00000    0.10473    0.04270 =
         0.07887    0.00374    0.05691    0.01145
CL5   5    0.270178    0.135310    0.060408    11.00000    0.08187    0.05132 =
         0.07301   -0.00615    0.00593   -0.00377
N1    3    0.556043    0.813613    0.196194    11.00000    0.01637    0.02132 =
         0.01504    0.00427    0.00013   -0.00392
N2    3    0.669508    0.737736    0.254406    11.00000    0.01366    0.01775 =
         0.01895    0.00089    0.00353    0.00080
N3    3    0.618899    0.856976    0.315216    11.00000    0.01352    0.01526 =
         0.01677    0.00059    0.00100   -0.00165
C43   1    0.569037    0.884972    0.361390    11.00000    0.01367    0.01744 =
         0.01882   -0.00062    0.00169    0.00187
C16   1    0.362657    0.783446    0.255471    11.00000    0.01418    0.02190 =
         0.01967    0.00041   -0.00361   -0.00184
C9    1    0.575046    0.862183    0.144603    11.00000    0.01911    0.01991 =
         0.01558    0.00514    0.00251    0.00068
C52   1    0.426468    0.865880    0.401254    11.00000    0.01754    0.02235 =
         0.02135   -0.00459   -0.00392    0.00334
C44   1    0.586548    0.956452    0.378581    11.00000    0.01968    0.01837 =
         0.02149    0.00016   -0.00036    0.00073
C30   1    0.722914    0.740376    0.207854    11.00000    0.01916    0.01426 =
         0.02359   -0.00136    0.00988   -0.00347
C37   1    0.681553    0.730646    0.452220    11.00000    0.01121    0.01947 =
         0.02044   -0.00132   -0.00150    0.00447
C23   1    0.765683    0.687961    0.306053    11.00000    0.01496    0.02000 =
         0.02782   -0.00142    0.00314   -0.00119
C51   1    0.671004    0.910410    0.308226    11.00000    0.01772    0.01667 =
         0.01645    0.00348   -0.00220   -0.00298
C32   1    0.679530    0.534211    0.371689    11.00000    0.02263    0.02180 =
         0.01986    0.00353    0.00442    0.00216
AFIX  43
H32   2    0.710185    0.549113    0.337078    11.00000   -1.20000
AFIX   0
C46   1    0.650973    0.972320    0.345457    11.00000    0.02109    0.01789 =
         0.02290    0.00312   -0.00225   -0.00333
C50   1    0.735715    0.906471    0.278008    11.00000    0.02074    0.02051 =
         0.01948    0.00238    0.00062   -0.00405
AFIX  43
H50   2    0.750385    0.863169    0.255385    11.00000   -1.20000
AFIX   0
C38   1    0.681533    0.702989    0.518259    11.00000    0.02367    0.02093 =
         0.02326    0.00043    0.00041    0.00703
AFIX  43
H38   2    0.658119    0.658164    0.527718    11.00000   -1.20000
AFIX   0
C31   1    0.638768    0.586292    0.404311    11.00000    0.01275    0.01766 =
         0.01616    0.00101   -0.00251    0.00031
C21   1    0.338326    0.840559    0.214783    11.00000    0.02699    0.02781 =
         0.02308    0.00431   -0.00280   -0.00193
AFIX  43
H21   2    0.366188    0.858389    0.179103    11.00000   -1.20000
AFIX   0
C63   1    0.505192    0.740339    0.514238    11.00000    0.01997    0.02439 =
         0.02175    0.00267    0.00314    0.00690
AFIX  43
H63   2    0.480784    0.704423    0.488161    11.00000   -1.20000
AFIX   0
C8    1    0.630943    0.910709    0.139852    11.00000    0.01844    0.02603 =
         0.02023    0.00386    0.00093   -0.00248
AFIX  43
H8    2    0.664998    0.914504    0.175114    11.00000   -1.20000
AFIX   0
C1    1    0.489652    0.782808    0.176806    11.00000    0.01658    0.02514 =
         0.01822    0.00192   -0.00277   -0.00411
C35   1    0.590755    0.489617    0.472931    11.00000    0.01498    0.02575 =
         0.02463    0.00773    0.00078   -0.00296
AFIX  43
H35   2    0.560663    0.474299    0.507857    11.00000   -1.20000
AFIX   0
C36   1    0.593713    0.563244    0.454681    11.00000    0.01462    0.02481 =
         0.01972    0.00127   -0.00071    0.00158
AFIX  43
H36   2    0.564941    0.598146    0.476565    11.00000   -1.20000
AFIX   0
C57   1    0.381293    0.849218    0.453362    11.00000    0.01517    0.05068 =
         0.02684   -0.00435    0.00277    0.00655
AFIX  43
H57   2    0.391869    0.809502    0.483059    11.00000   -1.20000
AFIX   0
C58   1    0.530956    0.803238    0.483434    11.00000    0.01492    0.02265 =
         0.01599   -0.00024    0.00351    0.00882
C53   1    0.409414    0.923268    0.357794    11.00000    0.02864    0.02434 =
         0.04067    0.00167   -0.00968   -0.00046
AFIX  43
H53   2    0.438464    0.934712    0.320858    11.00000   -1.20000
AFIX   0
C22   1    0.696652    0.701680    0.313604    11.00000    0.02094    0.01526 =
         0.01607    0.00083    0.00209    0.00018
C10   1    0.410601    0.649707    0.197341    11.00000    0.01691    0.02119 =
         0.02364    0.00284   -0.00770   -0.00289
C42   1    0.717155    0.795801    0.439802    11.00000    0.02033    0.02476 =
         0.02440    0.00091   -0.00293    0.00130
AFIX  43
H42   2    0.718190    0.814978    0.395164    11.00000   -1.20000
AFIX   0
C25   1    0.783256    0.711999    0.239253    11.00000    0.01963    0.01681 =
         0.02949   -0.00033    0.00538    0.00071
C62   1    0.515315    0.730125    0.583666    11.00000    0.02732    0.03650 =
         0.02114    0.01040    0.00705    0.00907
AFIX  43
H62   2    0.497744    0.687126    0.604752    11.00000   -1.20000
AFIX   0
C34   1    0.631395    0.438758    0.440460    11.00000    0.02593    0.01461 =
         0.02960    0.00526   -0.00273    0.00033
AFIX  43
H34   2    0.629224    0.388319    0.452979    11.00000   -1.20000
AFIX   0
C4    1    0.524124    0.857359    0.093042    11.00000    0.01716    0.03252 =
         0.02099    0.00624    0.00004   -0.00249
C17   1    0.323002    0.761449    0.310318    11.00000    0.02109    0.02767 =
         0.02508    0.00760   -0.00259   -0.00258
AFIX  43
H17   2    0.340711    0.725251    0.340729    11.00000   -1.20000
AFIX   0
C15   1    0.355731    0.609382    0.224304    11.00000    0.02990    0.02480 =
         0.02569    0.00328   -0.00251   -0.00504
AFIX  43
H15   2    0.333242    0.626706    0.263627    11.00000   -1.20000
AFIX   0
C2    1    0.471157    0.807449    0.113584    11.00000    0.02310    0.03407 =
         0.02016    0.00624   -0.00115   -0.00473
C49   1    0.777863    0.968011    0.282168    11.00000    0.02145    0.02943 =
         0.02505    0.00386   -0.00030   -0.00731
AFIX  43
H49   2    0.822378    0.966711    0.261934    11.00000   -1.20000
AFIX   0
C14   1    0.334008    0.544922    0.194477    11.00000    0.03258    0.02959 =
         0.04496    0.00616   -0.00816   -0.01168
AFIX  43
H14   2    0.297265    0.517378    0.213769    11.00000   -1.20000
AFIX   0
C40   1    0.749978    0.806080    0.556958    11.00000    0.02205    0.03605 =
         0.03231   -0.01158   -0.01091    0.00797
AFIX  43
H40   2    0.772646    0.832137    0.592702    11.00000   -1.20000
AFIX   0
C33   1    0.675321    0.460687    0.389762    11.00000    0.02719    0.01853 =
         0.02693   -0.00379    0.00303    0.00512
AFIX  43
H33   2    0.702803    0.425172    0.367154    11.00000   -1.20000
AFIX   0
C59   1    0.568303    0.854922    0.521642    11.00000    0.02193    0.02403 =
         0.02077   -0.00031   -0.00215    0.00886
AFIX  43
H59   2    0.587014    0.897504    0.500785    11.00000   -1.20000
AFIX   0
C20   1    0.273922    0.871508    0.225923    11.00000    0.02773    0.03089 =
         0.03122    0.00440   -0.00651    0.01082
AFIX  43
H20   2    0.257401    0.910192    0.197571    11.00000   -1.20000
AFIX   0
C39   1    0.715670    0.740961    0.569929    11.00000    0.02749    0.04051 =
         0.02353    0.00013   -0.00648    0.01303
AFIX  43
H39   2    0.715412    0.721938    0.614646    11.00000   -1.20000
AFIX   0
C29   1    0.721700    0.761886    0.139772    11.00000    0.02943    0.02426 =
         0.02504    0.00255    0.00733   -0.00040
AFIX  43
H29   2    0.680144    0.778917    0.118148    11.00000   -1.20000
AFIX   0
C48   1    0.757201    1.031632    0.314971    11.00000    0.03107    0.02243 =
         0.03466    0.00300    0.00020   -0.01416
AFIX  43
H48   2    0.786493    1.073798    0.314568    11.00000   -1.20000
AFIX   0
C18   1    0.258113    0.792003    0.320671    11.00000    0.02279    0.03512 =
         0.03227    0.00526    0.00627    0.00586
AFIX  43
H18   2    0.230521    0.775507    0.357077    11.00000   -1.20000
AFIX   0
C19   1    0.233474    0.846628    0.277909    11.00000    0.02351    0.03465 =
         0.03661   -0.00124    0.00029    0.00908
AFIX  43
H19   2    0.188507    0.867047    0.284420    11.00000   -1.20000
AFIX   0
C47   1    0.694515    1.034486    0.348254    11.00000    0.03429    0.01601 =
         0.03564    0.00008    0.00059   -0.00367
AFIX  43
H47   2    0.681235    1.077334    0.372372    11.00000   -1.20000
AFIX   0
C41   1    0.751225    0.833148    0.491969    11.00000    0.02148    0.02803 =
         0.03975   -0.00354   -0.00515   -0.00354
AFIX  43
H41   2    0.775483    0.877538    0.482789    11.00000   -1.20000
AFIX   0
C24   1    0.815368    0.654204    0.355668    11.00000    0.02028    0.03847 =
         0.04124    0.00821    0.00042    0.00518
AFIX 137
H24A  2    0.790605    0.641326    0.396918    11.00000   -1.50000
H24B  2    0.852594    0.689400    0.366640    11.00000   -1.50000
H24C  2    0.835618    0.609659    0.336114    11.00000   -1.50000
AFIX   0
C45   1    0.549734    1.009547    0.422560    11.00000    0.03190    0.01921 =
         0.03573   -0.00581    0.00499   -0.00009
AFIX 137
H45A  2    0.506938    0.986899    0.439122    11.00000   -1.50000
H45B  2    0.537937    1.053884    0.396546    11.00000   -1.50000
H45C  2    0.580047    1.022878    0.461018    11.00000   -1.50000
AFIX   0
C61   1    0.550416    0.781717    0.621534    11.00000    0.03150    0.04560 =
         0.01798    0.00207   -0.00056    0.01420
AFIX  43
H61   2    0.555970    0.775227    0.668962    11.00000   -1.20000
AFIX   0
C13   1    0.365495    0.519854    0.136285    11.00000    0.03880    0.03022 =
         0.05107   -0.01153   -0.01573   -0.00500
AFIX  43
H13   2    0.350346    0.475303    0.115594    11.00000   -1.20000
AFIX   0
C7    1    0.635207    0.953255    0.081970    11.00000    0.02800    0.02866 =
         0.02774    0.00596    0.00519   -0.00543
AFIX  43
H7    2    0.673088    0.986471    0.077443    11.00000   -1.20000
AFIX   0
C11   1    0.441440    0.624010    0.139186    11.00000    0.02858    0.04322 =
         0.03150   -0.01019    0.00220   -0.00750
AFIX  43
H11   2    0.478698    0.650693    0.119815    11.00000   -1.20000
AFIX   0
C60   1    0.577761    0.843292    0.590567    11.00000    0.02800    0.03571 =
         0.02919   -0.00762   -0.00688    0.01244
AFIX  43
H60   2    0.603378    0.878128    0.616811    11.00000   -1.20000
AFIX   0
C5    1    0.529953    0.901283    0.034624    11.00000    0.02815    0.04247 =
         0.01985    0.01088   -0.00487   -0.00276
AFIX  43
H5    2    0.496180    0.898161   -0.000947    11.00000   -1.20000
AFIX   0
C54   1    0.348570    0.964317    0.369089    11.00000    0.03452    0.02522 =
         0.07549   -0.00379   -0.02541    0.01193
AFIX  43
H54   2    0.337095    1.004271    0.339969    11.00000   -1.20000
AFIX   0
C6    1    0.585235    0.948449    0.030271    11.00000    0.03236    0.04280 =
         0.02066    0.01671    0.00499   -0.00067
AFIX  43
H6    2    0.589631    0.978483   -0.008730    11.00000   -1.20000
AFIX   0
C28   1    0.783177    0.757213    0.105886    11.00000    0.04103    0.02633 =
         0.02799    0.00195    0.01999   -0.00143
AFIX  43
H28   2    0.784015    0.771538    0.059733    11.00000   -1.20000
AFIX   0
C56   1    0.321015    0.889934    0.462427    11.00000    0.02154    0.08329 =
         0.03521   -0.02508   -0.00321    0.01420
AFIX  43
H56   2    0.290141    0.877477    0.497650    11.00000   -1.20000
AFIX   0
C12   1    0.417993    0.559276    0.109113    11.00000    0.04313    0.05103 =
         0.03931   -0.02412    0.00101   -0.00721
AFIX  43
H12   2    0.439081    0.542391    0.068894    11.00000   -1.20000
AFIX   0
C64   1    0.472537    0.463833    0.311507    11.00000    0.03273    0.03203 =
         0.04382   -0.00220    0.00469   -0.00146
AFIX  23
H64A  2    0.461409    0.506033    0.281539    11.00000   -1.20000
H64B  2    0.502986    0.481947    0.348841    11.00000   -1.20000
AFIX   0
C27   1    0.844947    0.731993    0.137017    11.00000    0.02878    0.03130 =
         0.04014   -0.00218    0.02008   -0.00490
AFIX  43
H27   2    0.886823    0.730546    0.112146    11.00000   -1.20000
AFIX   0
C3    1    0.408922    0.788194    0.070517    11.00000    0.02609    0.05721 =
         0.02467    0.01214   -0.00899   -0.01368
AFIX 137
H3A   2    0.376732    0.758083    0.096707    11.00000   -1.50000
H3B   2    0.423929    0.760448    0.030866    11.00000   -1.50000
H3C   2    0.385341    0.833440    0.055769    11.00000   -1.50000
AFIX   0
C26   1    0.845202    0.709549    0.202771    11.00000    0.01903    0.02681 =
         0.04108   -0.00280    0.00788    0.00001
AFIX  43
H26   2    0.887057    0.692370    0.223725    11.00000   -1.20000
AFIX   0
C55   1    0.306112    0.947739    0.420842    11.00000    0.02324    0.06468 =
         0.06587   -0.03508   -0.01101    0.02329
AFIX  43
H55   2    0.265669    0.976627    0.428181    11.00000   -1.20000
AFIX   0
C65   1    0.230412    0.056489    0.092317    11.00000    0.04207    0.04574 =
         0.05150   -0.00099   -0.00393    0.00366
AFIX  23
H65A  2    0.179903    0.058842    0.081434    11.00000   -1.20000
H65B  2    0.235817    0.056704    0.142164    11.00000   -1.20000
AFIX   0
HKLF 4


REM  FF400_0m_a.res in P2(1)/n
REM R1 =  0.0412 for   10290 Fo > 4sig(Fo)  and  0.0505 for all   12141 data
REM    715 parameters refined using      0 restraints

END

WGHT      0.0607     12.4291

REM Highest difference peak  3.100,  deepest hole -1.157,  1-sigma level  0.084
Q1    1   0.2820  0.0865  0.1477  11.00000  0.05    3.10
Q2    1   0.4795  0.3842  0.2612  11.00000  0.05    0.62
Q3    1   0.5731  0.7190  0.3454  11.00000  0.05    0.52
Q4    1   0.5046  0.7648  0.3576  11.00000  0.05    0.44
Q5    1   0.4809  0.7149  0.3097  11.00000  0.05    0.44
Q6    1   0.5424  0.7652  0.2986  11.00000  0.05    0.43
Q7    1   0.3015 -0.0137  0.0834  11.00000  0.05    0.38
Q8    1   0.5130  0.4216  0.2381  11.00000  0.05    0.36
Q9    1   0.3551  0.9626  0.3448  11.00000  0.05    0.35
Q10   1   0.5345  0.8016  0.1980  11.00000  0.05    0.35
Q11   1   0.2549  0.0583  0.0551  11.00000  0.05    0.34
Q12   1   0.5028  0.6607  0.3607  11.00000  0.05    0.34
Q13   1   0.5362  0.8619  0.3711  11.00000  0.05    0.34
Q14   1   0.5459  0.6605  0.2892  11.00000  0.05    0.33
Q15   1   0.5822  0.9233  0.3765  11.00000  0.05    0.32
Q16   1   0.2897  0.7615  0.2994  11.00000  0.05    0.32
Q17   1   0.5328  0.3785  0.2607  11.00000  0.05    0.31
Q18   1   0.6783  1.0037  0.3575  11.00000  0.05    0.31
Q19   1   0.3776  0.6458  0.1999  11.00000  0.05    0.31
Q20   1   0.4784  0.7878  0.1322  11.00000  0.05    0.31
;
_shelx_res_checksum   64651

_shelx_hkl_file
;
   3   0   0    1.10    1.40
  -3   0   0    0.40    1.30
   4   0   0 1025.80   52.79
   4   0   0 1096.09   52.99
  -4   0   0 1057.29   52.89
  -4   0   0 1058.39   52.89
   5   0   0    0.00    1.50
  -5   0   0   -2.40    1.30
  -6   0   0  522.85   26.80
   6   0   0  535.75   26.80
   7   0   0   -2.00    1.60
  -7   0   0    0.20    1.50
   8   0   0  445.96   23.20
  -8   0   0  450.95   23.20
  -9   0   0    0.70    2.30
   9   0   0   -3.10    2.30
  10   0   0   18.40    3.40
 -10   0   0   17.20    3.20
 -11   0   0    0.70    2.50
  11   0   0    4.10    2.70
  12   0   0  188.18   11.60
 -12   0   0  183.88   11.70
 -13   0   0   -0.90    2.90
  13   0   0    1.90    3.10
 -14   0   0    3.30    3.30
  14   0   0    3.30    3.60
 -15   0   0    0.00    3.60
  15   0   0    3.70    4.00
  16   0   0   21.00    5.10
 -16   0   0   25.60    5.20
 -17   0   0   -2.40    4.10
  17   0   0   -1.70    4.60
  18   0   0   30.00    6.30
 -18   0   0   39.00    6.50
 -19   0   0   -2.80    5.10
  19   0   0   -0.30    5.30
 -20   0   0  130.19   13.10
  20   0   0  158.18   13.60
 -21   0   0  -12.60    5.40
  21   0   0    1.10    6.20
  22   0   0    5.40    7.00
 -22   0   0    3.70    6.30
  -3  -1   0   22.40    3.40
   3  -1   0   26.70    3.00
  -3  -1   0   24.70    2.70
  -3   1   0   24.20    2.80
   3   1   0   27.20    2.90
  -4  -1   0  957.80   47.60
   4   1   0  963.30   47.50
   5  -1   0 1015.40   50.39
  -5  -1   0 1007.90   50.39
  -5   1   0 1031.30   50.39
   5   1   0 1009.00   50.39
   6  -1   0  378.56   19.30
  -6  -1   0  378.46   19.30
  -6   1   0  374.16   19.30
   6   1   0  370.16   19.30
   7  -1   0    4.20    2.00
  -7  -1   0    3.20    1.70
   7   1   0    2.30    1.80
  -7   1   0    2.00    1.80
  -8  -1   0   24.50    3.10
   8  -1   0   22.40    3.10
   8   1   0   24.70    3.10
  -8   1   0   28.50    3.20
   9  -1   0   72.49    6.90
  -9  -1   0   67.39    5.80
  -9   1   0   65.39    5.90
   9   1   0   67.09    5.90
  10  -1   0 1232.68   61.89
 -10  -1   0 1255.87   61.89
  10   1   0 1254.37   61.89
 -10   1   0 1191.08   61.79
 -11  -1   0    6.00    2.70
  11  -1   0    0.00    2.60
  11   1   0    1.80    2.80
 -11   1   0    0.40    2.50
 -12  -1   0  947.11   47.80
  12  -1   0  935.41   47.80
  12   1   0  946.31   47.80
 -12   1   0  920.41   47.70
  13  -1   0  265.67   15.40
 -13  -1   0  263.47   15.40
  13   1   0  249.38   15.30
 -13   1   0  261.67   15.30
 -14  -1   0  445.16   24.70
  14  -1   0  443.86   24.70
 -14   1   0  447.76   24.80
  14   1   0  473.45   24.90
  15  -1   0    1.80    3.90
 -15  -1   0    0.10    3.80
 -15   1   0   -2.70    3.60
  15   1   0    2.10    4.10
 -16  -1   0  275.87   18.60
  16  -1   0  280.77   17.40
  16   1   0  239.38   21.00
 -16   1   0  291.67   17.40
 -17  -1   0   -0.20    4.50
  17   1   0    8.40    5.00
  18  -1   0   62.29    7.50
 -18  -1   0   46.90    7.00
  18   1   0   61.89    7.50
 -18   1   0   60.19    7.30
 -19  -1   0   48.00    7.10
  19  -1   0   36.70    7.10
  19   1   0   45.80    7.30
 -19   1   0   35.60    6.60
  20  -1   0   11.50    6.40
 -20  -1   0    6.90    5.60
  20   1   0   17.00    6.40
 -20   1   0   22.00    6.20
 -21  -1   0   -3.50    5.40
  21  -1   0   -0.80    6.10
 -21   1   0   -0.80    5.70
  21   1   0    1.50    6.30
 -22  -1   0   54.39    8.10
  22  -1   0   59.79    9.20
  22   1   0   39.00    8.30
 -22   1   0   50.89    7.80
   1  -2   0    1.60    0.80
  -1  -2   0    0.60    0.60
  -2  -2   0 1185.08   57.99
   2  -2   0 1132.39   58.09
  -2   2   0 1162.68   58.09
   2   2   0 1209.98   58.09
  -3  -2   0  489.85   24.70
   3  -2   0  482.05   24.90
  -3  -2   0  480.95   24.70
  -3   2   0  496.65   24.80
  -3   2   0  475.05   24.90
   3   2   0  486.45   24.70
  -4  -2   0 2937.11  146.79
   4   2   0 3042.60  146.79
   5  -2   0 1546.85   77.29
  -5  -2   0 1578.54   77.19
  -5   2   0 1552.24   77.59
   5   2   0 1575.54   77.19
  -6  -2   0  664.13   33.20
   6  -2   0  667.83   33.30
  -6   2   0  652.73   33.20
   6   2   0  660.63   33.20
  -7  -2   0    0.30    1.70
   7  -2   0    2.40    2.10
   7   2   0    1.10    1.70
  -7   2   0   -0.80    1.80
  -8  -2   0    0.60    2.10
   8  -2   0   -0.60    2.20
   8   2   0    3.20    2.20
  -8   2   0    2.30    2.20
   9  -2   0   -0.10    2.60
  -9  -2   0    0.80    2.40
  -9   2   0   -4.00    4.40
   9   2   0    0.40    2.40
  -9   2   0    0.50    2.50
 -10  -2   0    4.10    2.60
  10  -2   0    1.40    3.50
  10  -2   0    1.40    2.70
 -10   2   0    8.70    3.20
  10   2   0    6.60    2.70
 -10   2   0    3.50    2.60
  11  -2   0  314.67   17.00
  11  -2   0  297.77   16.80
 -11  -2   0  293.07   16.70
 -11   2   0  302.27   16.60
 -11   2   0  296.17   16.70
  11   2   0  294.77   16.70
  12  -2   0   32.50    4.40
 -12  -2   0   37.40    4.50
  12  -2   0   32.10    4.50
 -12   2   0   33.50    4.40
  12   2   0   29.80    4.40
 -12   2   0   36.90    4.30
  13  -2   0  109.99    9.00
 -13  -2   0  110.09    8.70
  13  -2   0  108.19    8.70
  13   2   0  109.89    8.80
 -13   2   0  109.29    8.60
 -13   2   0  116.99    8.60
  14  -2   0    5.10    3.70
 -14  -2   0    0.80    3.50
  14  -2   0    7.40    3.90
 -14   2   0    5.50    3.70
 -14   2   0    4.30    3.30
  14   2   0    5.30    3.70
  15  -2   0   22.30    4.50
  15  -2   0    6.20    4.10
 -15  -2   0   17.60    4.60
  15   2   0   19.90    4.70
 -15   2   0   12.40    4.20
 -15   2   0   17.40    4.30
  16  -2   0   64.69    7.80
 -16  -2   0   52.09    6.90
  16  -2   0   53.59    6.60
 -16   2   0   47.40    6.20
 -16   2   0   69.99    8.50
  16   2   0   54.29    7.00
  17  -2   0    0.00    5.90
 -17  -2   0    1.50    4.50
  17  -2   0   -3.90    4.30
  17   2   0    0.80    4.60
 -17   2   0    6.70    4.80
 -17   2   0    0.50    4.70
  18  -2   0   12.50    5.60
 -18  -2   0    4.80    5.00
 -18   2   0    7.60    5.10
  18   2   0    8.90    5.30
  19  -2   0   10.70    6.00
 -19  -2   0   13.60    5.40
 -19   2   0   21.00    5.80
  19   2   0   11.20    5.70
 -20  -2   0   51.99    7.80
  20  -2   0   59.59    8.50
  20   2   0   88.39   11.40
 -20   2   0   71.99    8.40
  21  -2   0    5.90    6.60
 -21  -2   0   12.10    6.40
  21   2   0   20.70    6.70
 -21   2   0    5.80    5.80
 -22  -2   0   25.60    7.30
  22  -2   0   20.80    7.50
  22   2   0   23.10    7.50
 -22   2   0   34.00    7.10
   0  -3   0   -0.60    1.30
   0  -3   0   -1.90    1.30
   0   3   0   -0.50    1.30
   1  -3   0    1.40    1.40
  -1  -3   0    2.80    1.40
   1  -3   0    2.00    1.50
  -1  -3   0    1.30    1.40
   1   3   0    1.70    1.40
  -1   3   0    2.70    1.50
  -2  -3   0    4.10    1.70
   2   3   0    3.50    1.50
  -3  -3   0  722.03   35.90
   3   3   0  721.93   35.80
  -4  -3   0   21.10    2.70
   4   3   0   21.20    2.60
  -5  -3   0   47.80    3.80
   5   3   0   49.40    3.70
   6  -3   0 2710.23  131.49
   6  -3   0 2644.94  131.59
  -6  -3   0 2674.13  131.39
  -6   3   0 2625.44  131.39
  -6   3   0 2708.13  131.29
   6   3   0 2652.13  131.39
   7  -3   0   16.10    3.00
  -7  -3   0   13.60    2.40
   7  -3   0   17.50    2.70
   7   3   0   17.50    2.50
  -7   3   0   14.60    2.50
  -7   3   0   19.50    2.60
   8  -3   0  427.86   23.30
  -8  -3   0  457.75   23.30
   8  -3   0  446.66   23.30
  -8   3   0  435.36   23.20
  -8   3   0  457.95   23.10
   8   3   0  447.26   23.20
   9  -3   0  452.55   24.00
  -9  -3   0  462.75   24.00
   9  -3   0  447.16   23.90
  -9   3   0  457.55   23.70
   9   3   0  459.45   23.90
  -9   3   0  457.45   23.90
 -10  -3   0  226.88   13.00
  10  -3   0  230.58   13.20
  10  -3   0  213.18   13.00
 -10   3   0  237.48   12.90
 -10   3   0  222.58   13.00
  10   3   0  213.48   12.90
  11  -3   0  234.68   13.40
  11  -3   0  222.18   13.40
 -11  -3   0  224.58   13.30
 -11   3   0  218.58   13.10
 -11   3   0  228.28   13.30
  11   3   0  234.28   13.40
  12  -3   0  592.84   32.10
 -12  -3   0  624.64   32.20
  12  -3   0  627.84   32.10
 -12   3   0  635.54   31.90
  12   3   0  619.64   32.10
 -12   3   0  584.74   32.00
  13  -3   0  127.69    9.50
  13  -3   0  128.19    9.40
 -13  -3   0  120.19    9.60
 -13   3   0  135.19    9.10
  13   3   0  121.49    9.50
 -13   3   0  119.89    9.20
 -14  -3   0  324.37   19.00
  14  -3   0  338.07   18.70
  14  -3   0  315.37   18.70
  14   3   0  319.77   18.80
 -14   3   0  317.37   18.60
 -14   3   0  323.97   18.30
  15  -3   0   13.20    4.50
 -15  -3   0   30.50    6.10
  15  -3   0   19.40    5.00
 -15   3   0   28.40    4.90
 -15   3   0   28.40    5.00
 -16  -3   0   76.59    8.90
  16  -3   0   76.09    8.60
  16  -3   0   72.39    7.70
 -16   3   0   72.39    8.60
  16   3   0   78.39    9.20
 -16   3   0   69.69    8.70
  17  -3   0   65.49    8.70
  17  -3   0   73.39    8.00
 -17  -3   0   58.79    7.10
 -17   3   0   73.19    9.00
  17   3   0   61.99    7.50
 -17   3   0   52.09    7.00
 -18  -3   0    3.90    4.90
  18  -3   0    5.00    5.60
  18   3   0    3.80    5.20
 -18   3   0   11.10    5.40
 -18   3   0    2.10    7.00
 -19  -3   0   33.10    6.70
  19  -3   0   49.40    7.80
 -19   3   0   44.90    6.90
  19   3   0   40.80    7.00
  20  -3   0   53.49    7.90
 -20  -3   0   51.39    7.70
  20   3   0   53.89    8.20
 -20   3   0   38.50    7.30
 -21  -3   0    1.40    5.80
  21  -3   0    5.50    6.60
 -21   3   0    0.80    5.80
  21   3   0   13.60    6.80
  22  -3   0   37.50    8.60
 -22  -3   0   44.70    7.60
  22   3   0   35.80    8.00
 -22   3   0   26.00    7.40
   0  -4   0 1470.45   71.99
   0   4   0 1450.35   71.89
   1  -4   0  891.91   43.70
  -1  -4   0  885.01   43.70
   1   4   0  880.91   43.60
  -1   4   0  865.91   43.60
   2  -4   0  183.18    9.90
  -2  -4   0  181.18    9.70
  -2   4   0  178.88    9.60
   2   4   0  185.98    9.60
  -3  -4   0    9.50    1.70
   3  -4   0   12.50    1.90
   3   4   0    8.90    1.60
  -3   4   0   10.90    1.70
  -4  -4   0  624.54   31.60
   4  -4   0  611.84   31.70
  -4   4   0  642.64   31.60
   4   4   0  635.74   31.50
  -5  -4   0 1180.58   57.99
   5  -4   0 1170.38   58.19
  -5   4   0 1164.98   57.99
   5   4   0 1156.48   57.89
   6  -4   0  922.91   46.90
   6  -4   0  946.21   47.00
  -6  -4   0  932.91   46.80
   6   4   0  950.90   46.80
  -6   4   0  932.61   46.90
  -6   4   0  936.81   46.70
   7  -4   0  740.63   37.10
   7  -4   0  724.83   37.20
  -7  -4   0  729.53   37.00
   7   4   0  728.43   36.90
  -7   4   0  739.53   36.90
  -7   4   0  728.53   37.00
   8  -4   0  154.68    9.60
  -8  -4   0  160.28    9.50
   8  -4   0  145.49    9.40
  -8   4   0  143.69    9.20
   8   4   0  159.68    9.40
  -8   4   0  151.68    9.50
   9  -4   0  989.00   50.79
   9  -4   0 1004.20   50.89
  -9  -4   0 1052.89   50.89
   9   4   0 1019.10   50.69
  -9   4   0  960.40   50.69
  -9   4   0 1019.30   50.59
 -10  -4   0  265.07   15.00
  10  -4   0  269.57   15.00
  10  -4   0  262.97   15.10
 -10   4   0  265.07   14.90
  10   4   0  263.77   14.90
 -10   4   0  262.37   14.70
  11  -4   0  165.78   10.70
  11  -4   0  163.08   10.70
 -11  -4   0  168.88   10.70
 -11   4   0  162.98   10.50
  11   4   0  170.78   10.60
 -11   4   0  175.78   10.50
  12  -4   0   25.40    4.20
 -12  -4   0   24.20    4.10
  12  -4   0   34.10    4.30
  12   4   0   25.90    4.20
 -12   4   0   25.10    3.80
 -12   4   0   27.70    4.00
  13  -4   0    0.40    3.20
 -13  -4   0    0.30    3.40
  13  -4   0    3.10    3.50
 -13   4   0    6.70    3.20
 -13   4   0    2.50    3.00
  13   4   0    5.30    3.60
  14  -4   0  163.98   11.20
 -14  -4   0  170.48   11.80
  14  -4   0  160.08   11.60
 -14   4   0  153.78   10.90
  14   4   0  163.08   11.60
 -14   4   0  159.38   11.30
 -15  -4   0  240.58   16.50
  15  -4   0  248.78   15.80
  15  -4   0  254.77   15.50
  15   4   0  265.57   16.00
 -15   4   0  250.97   15.30
 -15   4   0  250.27   15.70
 -16  -4   0  505.35   27.50
  16  -4   0  475.05   26.80
  16  -4   0  474.15   27.30
 -16   4   0  496.05   26.60
 -16   4   0  489.05   27.10
  16   4   0  487.75   27.30
  17  -4   0  106.79   11.20
 -17  -4   0  111.69   11.00
  17  -4   0  121.29    9.90
  17   4   0  119.69   11.00
 -17   4   0   88.19   10.60
 -17   4   0   98.09   10.40
 -18  -4   0   66.89    7.80
 -18   4   0   74.09    7.70
  18   4   0   60.09    7.70
 -19  -4   0    1.10    5.10
  19  -4   0    9.20    5.80
 -19   4   0    6.20    5.20
  19   4   0    7.80    5.40
  20  -4   0    5.90    6.50
 -20  -4   0    8.00    5.80
  20   4   0    5.60    5.70
 -20   4   0    0.10    5.30
 -21  -4   0  387.76   24.00
  21  -4   0  367.86   24.40
  21   4   0  381.36   24.10
 -21   4   0  396.16   23.90
 -22  -4   0    8.70    6.40
  22  -4   0    3.40    7.40
  22   4   0    8.00    6.90
 -22   4   0   17.40    6.50
   0  -5   0   -0.80    1.30
   0   5   0    1.80    1.30
   1  -5   0  252.87   13.30
  -1  -5   0  250.17   13.20
   1   5   0  249.38   13.00
  -1   5   0  252.97   13.10
  -2  -5   0  306.97   16.30
   2  -5   0  323.77   16.50
  -2   5   0  315.17   16.20
   2   5   0  319.77   16.20
  -3  -5   0  406.86   20.70
   3  -5   0  410.16   20.90
  -3   5   0  409.56   20.70
   3   5   0  399.96   20.60
  -4  -5   0  314.77   16.50
   4  -5   0  324.67   16.80
  -4   5   0  323.77   16.50
   4   5   0  310.47   16.40
  -5  -5   0  145.19    8.40
   5  -5   0  147.29    8.60
  -5   5   0  140.49    8.30
   5   5   0  144.59    8.20
  -6  -5   0  110.69    7.30
   6  -5   0  113.39    7.60
   6  -5   0  109.49    7.60
  -6   5   0  116.49    7.10
   6   5   0  120.09    7.20
  -6   5   0  112.09    7.50
   7  -5   0   58.69    5.90
   7  -5   0   62.39    5.90
  -7  -5   0   65.39    5.70
  -7   5   0   72.09    5.50
   7   5   0   71.59    5.60
  -7   5   0   72.29    5.80
  -8  -5   0   21.60    3.40
   8  -5   0   23.30    3.40
   8  -5   0   23.00    3.40
   8   5   0   21.30    3.20
  -8   5   0   27.00    3.30
  -8   5   0   20.80    3.30
   9  -5   0   -2.70    2.50
   9  -5   0    1.20    2.40
  -9  -5   0    2.50    2.50
  -9   5   0   -0.30    2.20
  -9   5   0    3.10    2.50
   9   5   0   -3.70    2.30
  10  -5   0    1.90    2.60
 -10  -5   0   -0.70    2.60
  10  -5   0    0.00    2.70
  10   5   0   -2.20    2.50
 -10   5   0   -2.60    2.40
 -10   5   0    1.70    2.40
  11  -5   0   11.40    3.10
  11  -5   0   11.30    3.20
 -11  -5   0    4.20    2.90
 -11   5   0    8.10    2.80
 -11   5   0    3.00    2.70
  11   5   0    5.20    3.00
  12  -5   0  758.82   38.80
  12  -5   0  737.03   39.90
 -12  -5   0  754.82   38.90
 -12   5   0  742.43   38.50
 -12   5   0  764.22   38.80
  12   5   0  743.03   38.80
  13  -5   0  362.96   20.30
  13  -5   0  361.86   20.40
 -13  -5   0  351.46   20.40
 -13   5   0  382.46   20.20
 -13   5   0  353.26   19.90
  13   5   0  352.36   20.30
  14  -5   0   78.59    8.40
 -14  -5   0   58.59    9.90
  14  -5   0   83.49    7.90
 -14   5   0   77.09    7.60
 -14   5   0   90.89    8.20
  15  -5   0   59.99    7.00
 -15  -5   0   72.79    8.70
  15  -5   0   58.59    8.00
 -15   5   0   67.49    7.80
  15   5   0   74.69    8.70
 -15   5   0   67.09    8.00
  16  -5   0   16.00    4.60
 -16  -5   0   15.50    4.70
  16  -5   0   12.70    5.10
  16   5   0    6.20    4.70
 -16   5   0    9.40    4.30
 -16   5   0   15.00    4.60
  17  -5   0  183.38   13.00
 -17  -5   0  179.48   13.50
  17  -5   0  161.48   13.90
 -17   5   0  179.88   12.90
  17   5   0  178.28   13.60
 -17   5   0  190.58   13.60
 -18  -5   0  102.79   10.90
  18  -5   0  106.59   11.70
 -18   5   0  103.59   11.00
 -18   5   0  106.29   10.60
  18   5   0  109.39   11.00
  19  -5   0  761.02   41.80
 -19  -5   0  766.82   41.70
 -19   5   0  787.82   41.80
  19   5   0  760.12   41.60
 -20  -5   0    4.70    5.50
  20  -5   0    5.70    6.50
  20   5   0    6.50    6.10
 -20   5   0   -3.50    5.50
 -21  -5   0  354.26   22.70
  21  -5   0  368.76   23.20
  21   5   0  337.87   22.50
 -21   5   0  328.87   22.10
 -22  -5   0   -0.90    6.50
 -22   5   0    5.60    6.60
  22   5   0    5.40    7.20
   0  -6   0 1032.30   51.59
   0   6   0 1037.00   51.49
  -1  -6   0 2126.59  104.79
   1  -6   0 2149.88  104.89
  -1   6   0 2132.99  104.69
   1   6   0 2092.39  104.59
   2  -6   0  192.48   10.70
  -2  -6   0  193.58   10.50
  -2   6   0  192.68   10.40
   2   6   0  191.98   10.30
   3  -6   0  242.98   13.10
  -3  -6   0  241.28   12.90
   3   6   0  240.48   12.80
  -3   6   0  242.08   12.80
  -4  -6   0   45.00    4.10
   4  -6   0   43.80    4.30
   4   6   0   46.70    4.00
  -4   6   0   42.20    4.00
   5  -6   0  426.76   22.70
  -5  -6   0  438.46   22.60
   5   6   0  437.86   22.40
  -5   6   0  436.06   22.40
   6  -6   0  106.59    7.80
  -6  -6   0  113.49    7.40
   6  -6   0  115.49    7.50
  -6   6   0   98.59    8.40
   6   6   0  105.99    7.10
  -6   6   0  109.79    7.20
  -7  -6   0  298.57   16.70
   7  -6   0  303.47   16.80
   7  -6   0  320.97   16.70
  -7   6   0  305.27   16.70
   7   6   0  307.07   16.60
  -7   6   0  311.97   16.50
   8  -6   0   98.49    7.50
   8  -6   0  100.69    7.60
  -8  -6   0   99.09    7.30
   8   6   0   99.99    7.20
  -8   6   0   95.99    7.00
  -8   6   0  102.89    7.40
   9  -6   0 1441.66   71.79
  -9  -6   0 1463.15   71.79
   9  -6   0 1420.66   71.69
   9   6   0 1437.96   71.59
  -9   6   0 1430.46   71.69
  -9   6   0 1406.96   71.49
  10  -6   0  128.99    8.80
  10  -6   0  113.29    8.50
 -10  -6   0  120.29    8.70
 -10   6   0  121.99    8.20
 -10   6   0  129.89    8.50
  10   6   0  113.39    8.40
  11  -6   0  803.32   41.80
  11  -6   0  797.42   41.70
 -11  -6   0  840.62   41.90
  11   6   0  814.92   41.70
 -11   6   0  811.62   41.40
 -11   6   0  805.92   41.60
  12  -6   0   31.00    4.20
  12  -6   0   25.90    4.10
 -12  -6   0   28.20    4.40
  12   6   0   17.60    4.10
 -12   6   0   24.80    4.00
 -12   6   0   25.90    4.00
  13  -6   0  408.96   23.20
  13  -6   0  422.36   23.20
 -13  -6   0  423.06   23.70
  13   6   0  433.16   23.60
 -13   6   0  411.36   22.80
 -13   6   0  428.56   23.10
  14  -6   0    5.80    3.70
  14  -6   0   15.40    4.40
 -14  -6   0    8.20    4.30
 -14   6   0    6.20    3.70
 -14   6   0    4.40    3.70
  14   6   0    5.20    4.10
  15  -6   0   44.60    5.60
 -15  -6   0   36.50    5.80
  15  -6   0   34.80    5.90
 -15   6   0   35.90    5.10
 -15   6   0   35.20    5.50
  15   6   0   29.20    5.50
  16  -6   0   90.39   10.00
 -16  -6   0   98.99    9.80
  16  -6   0   76.39    9.10
 -16   6   0   71.09    9.10
  16   6   0   79.79    9.50
 -16   6   0   89.09    9.10
  17  -6   0  105.89   11.50
 -17  -6   0  104.69   10.70
  17  -6   0  120.39   10.20
  17   6   0  120.49   11.20
 -17   6   0   98.69   10.50
 -17   6   0  100.69   10.60
 -18  -6   0   57.29    7.80
  18  -6   0   52.59    7.90
  18   6   0   60.09    7.60
 -18   6   0   95.29   10.10
 -18   6   0   64.49    7.50
 -19  -6   0    8.00    5.70
  19  -6   0    4.40    6.30
  19   6   0    3.80    5.60
 -19   6   0    3.40    5.60
  20  -6   0   -3.40    6.40
 -20  -6   0   -3.30    5.40
  20   6   0    5.60    5.80
 -20   6   0    6.60    5.70
  21  -6   0    7.00    7.40
 -21  -6   0    1.60    6.10
  21   6   0    5.30    6.40
 -21   6   0    3.40    6.10
   0  -7   0   -0.20    1.80
   0   7   0   -1.40    1.40
   1  -7   0  875.71   43.50
  -1  -7   0  856.81   43.40
   1   7   0  879.71   43.20
  -1   7   0  848.12   43.20
   2  -7   0   11.60    2.40
  -2  -7   0    8.40    2.10
   2   7   0    6.10    1.80
  -2   7   0    6.40    1.90
  -3  -7   0   39.70    4.10
   3  -7   0   31.50    4.20
   3   7   0   30.90    3.70
  -3   7   0   29.90    3.70
   4  -7   0  597.14   30.60
  -4  -7   0  599.74   30.50
   4   7   0  584.34   30.30
  -4   7   0  604.64   30.30
   5  -7   0  111.49    7.80
  -5  -7   0  110.09    7.50
  -5   7   0  110.29    7.60
   5   7   0  105.69    7.20
  -6  -7   0  114.99    7.70
   6  -7   0  109.09    7.90
   6   7   0  113.29    7.40
  -6   7   0  111.89    7.50
   7  -7   0   19.60    3.40
   7  -7   0   19.20    3.40
  -7  -7   0   21.70    3.30
   7   7   0   18.60    3.00
  -7   7   0   20.50    3.40
  -7   7   0   22.30    3.10
  -8  -7   0  235.38   13.40
   8  -7   0  224.38   13.50
   8  -7   0  231.78   13.40
   8   7   0  230.38   13.10
  -8   7   0  240.78   13.40
  -8   7   0  222.78   13.10
   9  -7   0   19.60    3.70
   9  -7   0   26.60    3.90
  -9  -7   0   20.10    3.60
  -9   7   0   19.10    3.30
  -9   7   0   24.50    3.40
   9   7   0   19.40    3.50
 -10  -7   0    6.50    2.80
  10  -7   0    2.90    2.90
  10  -7   0    5.60    3.00
 -10   7   0    4.40    2.60
  10   7   0    0.80    2.70
 -10   7   0    2.10    2.60
  11  -7   0   44.00    5.20
  11  -7   0   50.49    5.40
 -11  -7   0   40.90    5.10
  11   7   0   46.70    6.00
 -11   7   0   46.70    5.50
 -11   7   0   49.99    5.80
 -12  -7   0   93.49    8.50
  12  -7   0  100.09    8.50
  12  -7   0   98.39    8.20
  12   7   0  106.59    8.50
 -12   7   0   93.69    7.80
 -12   7   0   90.99    7.90
  13  -7   0  360.86   20.70
  13  -7   0  375.36   20.70
 -13  -7   0  351.16   21.30
 -13   7   0  373.66   20.40
 -13   7   0  363.76   20.60
  13   7   0  369.26   20.90
  14  -7   0   71.29    7.70
 -14  -7   0   61.89    8.40
  14  -7   0   65.49    7.10
 -14   7   0   63.79    7.80
 -14   7   0   84.39    7.90
  14   7   0   60.59    6.90
  15  -7   0  190.38   13.00
 -15  -7   0  181.28   12.90
  15  -7   0  167.48   12.90
 -15   7   0  164.58   12.20
 -15   7   0  176.98   12.30
  15   7   0  165.28   12.60
 -16  -7   0   79.89    9.60
  16  -7   0   99.19    9.50
  16  -7   0   74.59    8.30
 -16   7   0   73.19    8.90
 -16   7   0   77.89    9.10
  16   7   0   91.69    9.50
 -17  -7   0   11.90    5.10
  17  -7   0   20.80    6.10
  17  -7   0    4.30    5.00
 -17   7   0   12.40    5.10
 -17   7   0   12.40    5.20
  17   7   0   11.90    5.10
  18  -7   0   20.90    8.20
 -18  -7   0    4.40    5.10
  18  -7   0    6.00    6.00
 -18   7   0    7.60    5.50
 -18   7   0    2.90    5.40
  18   7   0   -2.80    5.20
  19  -7   0  253.67   21.30
 -19  -7   0  277.27   18.20
  19   7   0  261.17   18.20
 -20  -7   0   11.30    6.10
  20  -7   0    1.70    7.00
 -20   7   0    0.30    5.80
  20   7   0    2.10    6.00
  21  -7   0  318.27   23.00
 -21  -7   0  344.77   22.50
  21   7   0  335.97   22.40
 -21   7   0  354.36   22.10
   0  -8   0   23.30    3.20
   0   8   0   23.60    2.80
   1  -8   0   56.99    5.30
  -1  -8   0   54.29    5.00
   1   8   0   53.49    4.50
  -1   8   0   49.30    4.60
   2  -8   0   -1.00    2.30
  -2  -8   0    0.60    2.30
   2   8   0   -0.20    2.00
  -2   8   0    1.90    2.10
   3  -8   0  683.73   34.90
  -3  -8   0  672.13   34.80
   3   8   0  696.33   34.60
  -3   8   0  682.93   34.60
   4  -8   0  187.68   10.80
  -4  -8   0  174.08   10.50
   4   8   0  173.48   10.30
  -4   8   0  177.08   10.30
  -5  -8   0   45.40    4.90
   5  -8   0   36.20    4.10
   5   8   0   35.50    4.40
  -5   8   0   32.70    3.70
   6  -8   0  134.29    8.80
  -6  -8   0  126.89    8.50
  -6   8   0  128.39    8.20
   6   8   0  121.89    8.30
   7  -8   0  219.28   13.10
  -7  -8   0  230.48   13.10
   7  -8   0  214.78   13.10
  -7   8   0  232.68   13.00
  -7   8   0  216.08   12.70
   7   8   0  224.78   12.80
   8  -8   0  977.90   49.30
   8  -8   0  976.00   49.00
  -8  -8   0  988.30   49.10
  -8   8   0  961.00   48.80
  -8   8   0  941.81   48.90
   8   8   0  958.10   48.90
   9  -8   0   24.40    3.80
  -9  -8   0   17.70    3.70
   9  -8   0   24.20    3.90
  -9   8   0   22.40    3.50
  -9   8   0   19.60    3.40
   9   8   0   17.10    3.40
  10  -8   0  348.07   19.30
 -10  -8   0  357.86   19.50
  10  -8   0  340.47   19.50
 -10   8   0  357.66   19.10
 -10   8   0  341.57   19.10
  10   8   0  345.47   19.20
  11  -8   0  111.59    8.60
 -11  -8   0   98.39    8.60
  11  -8   0  113.19    8.50
 -11   8   0  103.39    8.20
 -11   8   0  103.49    8.10
  11   8   0   99.89    8.50
  12  -8   0   -2.20    3.40
  12  -8   0    0.80    3.70
 -12  -8   0   -1.50    4.30
 -12   8   0    2.80    3.10
 -12   8   0    6.20    3.20
  12   8   0    3.90    3.60
 -13  -8   0  173.48   12.60
  13  -8   0  187.38   12.70
  13  -8   0  198.98   12.90
  13   8   0  188.98   12.90
 -13   8   0  182.48   12.30
 -13   8   0  202.78   12.50
  14  -8   0  152.68   12.20
 -14  -8   0  172.98   12.40
  14  -8   0  167.58   12.00
  14   8   0  174.08   12.30
 -14   8   0  168.68   11.80
 -14   8   0  171.58   11.80
  15  -8   0  318.27   19.20
  15  -8   0  307.17   18.90
 -15  -8   0  301.67   19.10
 -15   8   0  322.67   18.70
  15   8   0  295.97   18.80
 -15   8   0  329.97   18.90
  16  -8   0   74.09    8.50
  16  -8   0   91.59    9.60
 -16  -8   0   87.09    9.60
 -16   8   0   87.89    9.50
  16   8   0   80.99    9.70
 -16   8   0   85.29    9.30
 -17  -8   0   94.79   10.30
  17  -8   0   80.09   10.00
  17  -8   0   86.49   11.20
  17   8   0   80.39   10.20
 -17   8   0   86.89   10.10
 -17   8   0   92.39   10.10
  18  -8   0  391.96   26.80
  18  -8   0  366.46   23.00
 -18  -8   0  356.86   22.50
 -18   8   0  358.16   22.20
  18   8   0  350.36   22.50
 -18   8   0  389.66   22.60
 -19  -8   0   64.29    8.00
  19   8   0   60.49    8.00
 -19   8   0   41.30    8.70
  20  -8   0   -8.20    7.10
 -20  -8   0   10.10    6.00
 -20   8   0   -4.40    5.80
  20   8   0    6.90    6.20
  21  -8   0   15.80    8.00
 -21  -8   0   -5.80    5.90
 -21   8   0  -19.30    9.50
  21   8   0    3.30    6.60
   0  -9   0   -1.50    2.30
   0   9   0   -0.40    2.10
   1  -9   0  978.40   49.60
  -1  -9   0  989.30   49.50
  -1   9   0  977.80   49.20
   1   9   0  984.10   49.20
  -2  -9   0 1004.40   49.99
   2  -9   0  981.70   49.99
  -2   9   0  992.70   49.70
   2   9   0  988.10   49.70
   3  -9   0 1917.31   92.99
  -3  -9   0 1853.71   92.79
  -3   9   0 1873.31   92.59
   3   9   0 1832.22   92.49
  -4  -9   0   83.29    6.60
   4  -9   0   78.49    6.70
  -4   9   0   84.19    6.30
   4   9   0   83.69    6.20
   5  -9   0  692.53   35.80
  -5  -9   0  695.53   35.60
  -5   9   0  708.33   35.50
   5   9   0  683.43   35.40
   6  -9   0  138.69    9.30
  -6  -9   0  143.19    9.10
  -6   9   0  134.69    8.60
   6   9   0  128.89    8.70
   7  -9   0   14.40    3.40
  -7  -9   0   17.20    3.40
   7  -9   0   12.00    3.70
   7   9   0   11.70    3.00
  -7   9   0   12.90    3.00
  -7   9   0   17.80    3.60
   8  -9   0  128.09    8.50
  -8  -9   0  114.79    8.50
   8  -9   0  108.99    8.50
  -8   9   0  110.29    8.10
   8   9   0  107.59    8.00
  -8   9   0  113.69    8.10
  -9  -9   0  343.67   18.00
   9  -9   0  309.57   18.10
   9  -9   0  318.87   17.90
  -9   9   0  309.07   17.60
   9   9   0  307.27   17.60
  -9   9   0  310.97   17.50
 -10  -9   0    8.60    3.70
  10  -9   0   17.60    3.90
  10  -9   0    9.00    3.70
 -10   9   0   17.20    3.50
  10   9   0    8.90    3.40
 -10   9   0   11.70    3.20
  11  -9   0   37.00    4.90
  11  -9   0   29.40    4.60
 -11  -9   0   27.90    5.70
  11   9   0   33.50    5.50
 -11   9   0   35.00    4.60
 -11   9   0   32.00    4.40
  12  -9   0    4.50    4.00
  12  -9   0   -1.80    3.60
 -12  -9   0    2.00    3.60
  12   9   0    4.40    3.60
 -12   9   0    0.40    3.40
 -12   9   0    8.30    3.40
  13  -9   0  112.29   10.40
  13  -9   0  138.19   10.60
 -13  -9   0  132.79   10.60
  13   9   0  136.99   10.20
 -13   9   0  143.59   10.30
 -13   9   0  114.89    9.80
 -14  -9   0   46.20    6.20
  14  -9   0   46.60    6.00
  14  -9   0   42.90    6.00
 -14   9   0   41.40    5.70
  14   9   0   42.70    6.00
 -14   9   0   41.10    5.60
 -15  -9   0   37.20    5.70
  15  -9   0   31.30    5.90
  15  -9   0   23.90    5.30
 -15   9   0   29.30    5.60
  15   9   0   31.50    5.60
 -15   9   0   25.40    5.00
 -16  -9   0    3.00    4.60
  16  -9   0   15.30    5.30
  16  -9   0   -0.20    5.40
 -16   9   0   13.90    5.10
  16   9   0   -2.50    4.50
 -16   9   0    5.70    4.60
 -17  -9   0    3.20    4.80
  17  -9   0   -3.80    5.20
  17  -9   0    2.20    5.90
 -17   9   0   -1.90    5.30
  17   9   0    5.70    5.00
 -17   9   0   -1.60    5.00
 -18  -9   0    0.30    5.10
  18  -9   0    8.80    6.90
  18   9   0    0.90    5.60
 -18   9   0   -7.40    5.40
 -18   9   0    8.50    5.90
 -19  -9   0   20.90    6.20
  19  -9   0   19.00    8.20
 -19   9   0   13.60    6.20
  19   9   0   21.30    6.30
  20  -9   0    4.60    7.90
 -20  -9   0   -1.70    5.80
  20   9   0    3.30    6.10
   0 -10   0   82.19    6.30
   0  10   0   66.49    5.80
  -1 -10   0   13.70    3.10
   1 -10   0   17.00    3.20
   1  10   0   14.20    2.80
  -1  10   0   14.50    2.70
   2 -10   0  909.91   46.80
  -2 -10   0  922.71   46.70
   2  10   0  917.51   46.40
  -2  10   0  937.91   46.50
  -3 -10   0  623.14   32.60
   3 -10   0  612.34   32.70
  -3  10   0  659.53   32.40
   3  10   0  628.94   32.30
  -4 -10   0  307.97   16.90
   4 -10   0  303.07   17.10
  -4  10   0  304.67   16.60
   4  10   0  299.87   16.50
  -5 -10   0  150.08    9.70
   5 -10   0  147.19    9.80
   5  10   0  146.59    9.30
  -5  10   0  142.99    9.30
  -6 -10   0  247.18   14.50
   6 -10   0  247.38   14.70
   6  10   0  252.07   14.20
  -6  10   0  250.47   14.10
   7 -10   0  570.24   30.80
  -7 -10   0  583.24   30.60
   7 -10   0  605.94   33.00
   7  10   0  578.74   30.30
  -7  10   0  582.14   30.30
   8 -10   0   85.09    7.40
  -8 -10   0   82.19    7.50
   8 -10   0   72.49    7.40
   8  10   0   73.69    7.10
  -8  10   0   87.39    7.20
  -8  10   0   78.99    6.90
   9 -10   0  518.85   27.80
  -9 -10   0  522.75   27.70
   9 -10   0  522.05   27.60
   9  10   0  513.15   27.50
  -9  10   0  516.95   27.30
  -9  10   0  504.95   27.30
 -10 -10   0   41.70    5.80
  10 -10   0   47.50    5.50
  10 -10   0   54.09    6.00
 -10  10   0   58.29    6.50
  10  10   0   48.30    5.60
 -10  10   0   52.79    6.50
 -11 -10   0  184.18   12.70
  11 -10   0  197.48   12.60
  11 -10   0  194.28   13.00
 -11  10   0  190.08   12.50
 -11  10   0  190.08   12.20
  11  10   0  188.78   12.50
 -12 -10   0   61.59    8.20
  12 -10   0   77.39    8.40
  12 -10   0   69.89    8.10
  12  10   0   76.19    8.20
 -12  10   0   83.59    8.00
 -12  10   0   74.69    7.70
  13 -10   0  504.85   28.40
  13 -10   0  512.15   28.60
 -13 -10   0  517.35   28.60
 -13  10   0  526.85   28.10
  13  10   0  522.85   28.30
 -13  10   0  516.55   28.00
 -14 -10   0    6.40    4.50
  14 -10   0    4.40    4.60
  14 -10   0    9.10    4.80
  14  10   0    3.40    4.20
 -14  10   0    7.90    4.20
 -14  10   0    0.90    4.20
 -15 -10   0   53.19    6.90
  15 -10   0   56.99    7.30
  15 -10   0   52.99    7.20
  15  10   0   44.90    6.30
 -15  10   0   53.29    6.70
 -15  10   0   70.49    8.40
  16 -10   0   33.30    6.70
  16 -10   0   39.70    6.40
 -16 -10   0   31.30    6.20
 -16  10   0   34.30    6.10
  16  10   0   24.90    5.80
 -16  10   0   38.00    5.80
  17 -10   0  229.08   16.60
  17 -10   0  257.57   17.70
 -17 -10   0  223.38   16.60
 -17  10   0  252.47   16.50
  17  10   0  221.88   16.10
 -17  10   0  257.07   16.80
 -18 -10   0  202.08   15.00
  18 -10   0  180.28   16.30
  18  10   0  180.88   14.70
 -18  10   0  203.18   15.40
 -18  10   0  181.68   14.60
 -19 -10   0   45.50    7.80
  19  10   0   53.89    7.80
 -20 -10   0    1.60    6.00
  20  10   0  -11.70    5.60
   0 -11   0    5.10    2.70
   0  11   0   -1.70    2.20
  -1 -11   0   75.09    6.60
   1 -11   0   73.29    6.60
  -1  11   0   76.39    6.00
   1  11   0   73.99    6.00
  -2 -11   0   31.20    4.00
   2 -11   0   30.50    4.00
   2  11   0   35.90    4.60
  -2  11   0   29.40    3.70
   3 -11   0  455.15   23.80
  -3 -11   0  437.96   23.60
  -3  11   0  439.66   23.30
   3  11   0  433.96   23.20
  -4 -11   0  209.98   12.90
   4 -11   0  209.38   13.10
  -4  11   0  218.38   12.60
   4  11   0  218.88   12.50
   5 -11   0  552.64   29.60
  -5 -11   0  561.14   29.40
  -5  11   0  573.64   29.20
   5  11   0  550.44   29.10
   6 -11   0  162.58   11.10
  -6 -11   0  170.68   11.00
  -6  11   0  165.38   10.60
   6  11   0  170.28   10.60
  -7 -11   0    2.30    3.10
   7 -11   0    4.50    3.40
  -7  11   0   -0.50    2.70
   7  11   0    1.00    2.90
   8 -11   0  315.17   18.20
  -8 -11   0  280.27   20.40
   8 -11   0  337.07   18.20
  -8  11   0  305.67   17.50
  -8  11   0  317.97   17.70
   9 -11   0  143.29   10.00
   9 -11   0  102.79    9.80
  -9 -11   0  138.39   10.10
  -9  11   0  136.29    9.60
   9  11   0  121.39    9.50
  -9  11   0  133.09    9.60
 -10 -11   0   -0.90    3.40
  10 -11   0   -1.60    3.90
  10 -11   0    4.20    4.10
  10  11   0    4.30    3.60
 -10  11   0    5.20    3.70
 -10  11   0    0.00    3.30
  11 -11   0   11.10    4.20
 -11 -11   0    6.40    3.90
  11 -11   0    5.00    4.40
 -11  11   0    4.40    3.80
 -11  11   0    3.00    3.40
  11  11   0    4.00    3.80
  12 -11   0  171.58   12.70
  12 -11   0  167.58   12.20
 -12 -11   0  181.88   12.60
  12  11   0  175.28   12.00
 -12  11   0  163.08   12.40
 -12  11   0  160.28   12.10
 -13 -11   0   92.89    9.80
  13 -11   0  102.89   10.10
  13 -11   0   98.99   10.20
 -13  11   0  108.59    9.10
 -13  11   0   98.09    9.60
  13  11   0  103.39    9.50
 -14 -11   0   -0.20    4.40
  14 -11   0    5.90    4.90
  14 -11   0   14.80    5.00
 -14  11   0   -0.10    4.00
  14  11   0    0.90    4.30
 -14  11   0    0.90    4.30
  15 -11   0   74.09    8.40
  15 -11   0   81.89   10.20
 -15 -11   0   63.19    7.80
 -15  11   0   84.59    9.70
 -15  11   0   80.19    9.10
  15  11   0   69.79    9.40
 -16 -11   0   85.59   10.80
  16 -11   0  116.49   12.00
  16 -11   0  103.89   11.40
 -16  11   0  106.09   10.20
 -16  11   0   91.79   11.00
  16  11   0   83.29   10.10
 -17 -11   0  102.79   11.60
  17 -11   0  120.79   13.60
  17 -11   0  120.99   12.40
  17  11   0  109.39   11.30
 -17  11   0  107.19   12.40
 -18 -11   0   21.80    6.30
 -18  11   0    2.50    6.70
  18  11   0    7.50    5.70
 -19 -11   0   22.30    6.80
  19  11   0   30.90    7.20
   0 -12   0 2278.37  110.69
   0  12   0 2168.88  110.19
  -1 -12   0   17.20    3.70
   1 -12   0   13.90    3.50
  -1  12   0   15.90    3.10
   1  12   0   14.10    3.10
   2 -12   0  280.87   16.30
  -2 -12   0  280.07   16.20
   2  12   0  274.97   15.70
  -2  12   0  291.17   15.80
   3 -12   0   11.40    3.30
  -3 -12   0    8.90    3.30
   3  12   0    7.90    2.90
  -3  12   0    3.80    2.90
  -4 -12   0  295.07   17.10
   4 -12   0  295.47   17.30
   4  12   0  292.17   16.70
  -4  12   0  309.27   16.70
  -5 -12   0  122.09    9.10
   5 -12   0  109.19    9.30
   5  12   0  121.99    8.60
  -5  12   0  133.59    8.90
   6 -12   0    4.20    3.30
  -6 -12   0    2.50    3.40
   6  12   0    3.40    3.60
  -6  12   0   -3.20    3.00
  -7 -12   0  157.38   11.20
   7 -12   0  159.68   11.50
  -7  12   0  157.58   10.50
   7  12   0  152.78   10.70
   8 -12   0    9.50    4.70
  -8 -12   0    7.40    3.70
   8 -12   0    3.30    3.90
  -8  12   0    5.00    3.40
  -8  12   0   -0.60    6.50
   8  12   0   10.60    3.60
   9 -12   0   84.79    8.80
   9 -12   0   81.69    8.70
  -9 -12   0   81.99    8.40
  -9  12   0   90.59    8.30
  -9  12   0   92.09    8.10
   9  12   0   88.19    7.90
 -10 -12   0   23.40    4.60
  10 -12   0   14.40    4.70
  10 -12   0   14.10    4.80
 -10  12   0   23.20    4.60
  10  12   0   16.20    4.20
 -10  12   0    5.50    4.00
  11 -12   0  480.25   26.90
  11 -12   0  488.15   26.50
 -11 -12   0  481.35   26.60
  11  12   0  472.75   26.20
 -11  12   0  477.35   26.30
 -11  12   0  468.85   25.90
 -12 -12   0    0.10    4.00
  12 -12   0   -4.00    4.80
  12 -12   0    5.00    4.60
 -12  12   0    8.70    4.00
 -12  12   0    8.30    4.60
  12  12   0    6.40    4.10
  13 -12   0  577.54   30.80
 -13 -12   0  568.84   30.80
  13 -12   0  548.15   31.00
 -13  12   0  555.94   30.10
 -13  12   0  558.34   30.50
  13  12   0  535.75   30.50
 -14 -12   0   46.20    6.60
  14 -12   0   44.00    7.00
  14 -12   0   51.89    6.80
 -14  12   0   52.49    6.70
  14  12   0   41.10    6.30
 -14  12   0   42.30    5.90
 -15 -12   0  160.28   13.20
  15 -12   0  163.88   13.40
  15 -12   0  134.49   13.50
  15  12   0  172.18   12.80
 -15  12   0  171.38   13.50
 -16 -12   0   48.60    7.70
  16 -12   0   94.69   11.10
 -16  12   0   65.79    8.20
  16  12   0   62.09    7.80
 -17 -12   0   -6.40    5.00
  17 -12   0    5.00    6.70
  17  12   0   -1.40    5.00
 -17  12   0    6.80    7.70
 -18 -12   0  128.19   12.50
  18  12   0  125.19   12.90
   0 -13   0    5.30    3.40
   0  13   0    5.50    3.10
  -1 -13   0    3.00    3.20
   1 -13   0    4.30    3.40
   1  13   0    4.20    3.10
  -1  13   0    7.10    3.10
   2 -13   0   38.40    5.30
  -2 -13   0   41.60    5.00
   2  13   0   39.20    4.70
  -2  13   0   46.00    5.80
  -3 -13   0  146.59   10.40
   3 -13   0  145.79   10.40
  -3  13   0  138.49    9.80
   3  13   0  146.19    9.90
   4 -13   0  232.28   14.40
  -4  13   0  221.38   13.70
  -5 -13   0   61.09    7.20
   5 -13   0   59.09    7.60
  -5  13   0   76.79    7.30
   5  13   0   66.79    6.70
   6 -13   0   89.89    8.70
  -6 -13   0   85.49    8.50
  -6  13   0   98.59    8.20
   6  13   0   90.89    7.90
  -7 -13   0   15.80    4.10
   7 -13   0    9.90    4.40
   7  13   0   15.00    3.90
  -7  13   0   13.10    3.70
   8 -13   0    2.70    4.10
  -8 -13   0    0.40    3.60
   8  13   0    8.20    3.60
  -8  13   0   -4.80    3.30
  -9 -13   0   95.49    9.30
   9 -13   0  118.59   10.90
   9 -13   0  110.39   10.30
  -9  13   0  101.89    9.30
   9  13   0  111.89    9.10
  -9  13   0  111.39    9.70
  10 -13   0  210.38   14.50
  10 -13   0  220.48   14.90
 -10 -13   0  217.28   14.20
 -10  13   0  212.58   13.70
 -10  13   0  203.18   14.10
  10  13   0  217.88   13.90
 -11 -13   0    5.60    4.30
  11 -13   0    3.10    4.70
  11 -13   0    9.90    4.90
 -11  13   0    2.40    4.00
 -11  13   0    6.60    4.40
  11  13   0   -3.00    3.80
  12 -13   0  863.31   43.30
  12 -13   0  806.62   44.20
 -12 -13   0  830.92   43.50
 -12  13   0  828.12   43.00
  12  13   0  798.42   43.10
 -12  13   0  798.52   44.60
 -13 -13   0   14.00    5.00
  13 -13   0   11.10    6.10
  13  13   0   12.00    4.80
 -14 -13   0  370.16   21.60
  14  13   0  364.16   21.50
 -14  13   0  337.37   23.30
  15 -13   0   42.90    7.40
 -15 -13   0   33.60    6.50
 -15  13   0   39.60    7.00
  15  13   0   32.70    6.30
  16 -13   0    5.10    6.10
 -16 -13   0    7.70    5.40
  16  13   0    1.40    5.40
 -16  13   0    3.70    6.10
  17 -13   0   13.00    6.60
 -17 -13   0    5.10    5.70
  17  13   0   15.30    6.10
 -17  13   0   12.80    7.00
 -18 -13   0    7.10    6.40
  18  13   0   18.30    6.60
   0 -14   0   55.69   10.00
   0  14   0   73.19    8.90
  -1 -14   0    3.20    3.70
   1  14   0    4.60    3.30
   2 -14   0  297.17   21.90
  -2 -14   0  329.67   19.00
   2  14   0  341.17   18.40
  -3 -14   0   60.59    7.40
   3 -14   0   68.59    9.20
   3  14   0   60.79    6.80
  -4 -14   0    7.40    3.80
   4 -14   0    2.20    4.90
   4  14   0    2.60    3.10
  -5 -14   0    3.30    3.70
   5 -14   0   -0.90    4.60
   5  14   0    0.30    3.10
  -6 -14   0  133.29   10.30
   6  14   0  128.79    9.80
  -7 -14   0   11.90    4.10
   7  14   0    4.60    3.70
  -7  14   0    8.00    6.80
  -8 -14   0    2.60    3.70
   8  14   0    3.60    3.60
  -8  14   0    1.60    4.80
   9 -14   0   10.00    5.30
  -9 -14   0    6.20    4.20
   9 -14   0   -1.90    7.80
   9  14   0    7.30    3.60
  -9  14   0    1.80    4.30
  10 -14   0  167.18   13.30
 -10 -14   0  175.58   12.60
  10 -14   0  182.98   14.70
  10  14   0  176.38   12.30
 -10  14   0  176.58   12.90
 -11 -14   0   53.69    6.60
  11 -14   0   61.19    7.60
 -11  14   0   45.90    6.60
  11  14   0   61.19    8.00
  12 -14   0   14.50    5.70
 -12 -14   0   12.30    4.70
  12  14   0    7.20    4.40
 -12  14   0    4.70    5.00
 -13 -14   0    0.80    4.60
  13 -14   0   -5.20    5.40
 -13  14   0    2.00    5.30
  13  14   0    4.50    4.60
  14 -14   0  246.08   17.20
 -14 -14   0  242.58   16.80
 -14  14   0  269.67   17.00
  14  14   0  224.18   16.40
 -15 -14   0    2.40    5.10
  15 -14   0   -2.70    5.90
  15  14   0    7.10    5.00
 -15  14   0   -3.60    5.60
 -16 -14   0  362.06   23.20
  16 -14   0  361.96   23.60
  16  14   0  365.06   22.60
 -16  14   0  397.06   23.40
 -17 -14   0  -10.00    5.70
  17 -14   0    4.50    6.80
  17  14   0   -4.40    5.90
 -17  14   0    6.60    6.40
   0 -15   0   -0.20    3.80
   0  15   0    1.00    3.50
  -1 -15   0    3.90    4.00
   1 -15   0    4.60    4.00
  -1  15   0    5.50    3.50
   1  15   0    8.60    3.60
   2 -15   0   -3.40    3.90
  -2 -15   0   -2.90    3.50
  -2  15   0    1.90    3.30
   2  15   0    0.90    3.30
  -3 -15   0   37.60    5.40
   3 -15   0   46.60    5.70
   3  15   0   30.20    4.90
  -3  15   0   31.20    4.90
   4 -15   0    7.20    4.60
  -4 -15   0   13.80    4.10
   4  15   0    9.80    3.70
  -4  15   0    6.50    3.90
   5 -15   0   38.30    6.00
  -5 -15   0   39.20    5.70
   5  15   0   35.20    5.10
  -5  15   0   40.00    5.30
  -6 -15   0  160.58   12.30
   6 -15   0  178.98   13.00
  -6  15   0  179.98   12.20
   6  15   0  180.48   11.90
   7 -15   0   70.49    7.90
  -7 -15   0   70.09    8.20
  -7  15   0   74.29    8.00
   7  15   0   62.89    7.60
   8 -15   0   76.59    9.50
  -8 -15   0   86.19    8.90
  -8  15   0   81.59    8.70
   8  15   0   78.99    8.40
  -9 -15   0    4.50    4.20
   9 -15   0    5.20    4.80
  -9  15   0   -4.40    4.30
   9  15   0    3.90    3.90
 -10 -15   0   88.39    9.10
  10 -15   0   71.29    9.50
 -10  15   0   74.89    9.30
  10  15   0   81.19    8.80
 -11 -15   0   35.80    6.00
  11 -15   0   44.10    6.90
  11  15   0   37.00    5.80
 -11  15   0   45.20    6.70
 -12 -15   0  326.57   19.80
  12 -15   0  307.47   20.40
  12  15   0  336.47   19.80
 -12  15   0  308.97   19.70
  13 -15   0   30.70    7.20
 -13 -15   0   28.90    6.00
  13  15   0   24.20    5.70
 -13  15   0   41.00    6.60
 -14 -15   0  156.88   13.30
  14 -15   0  172.18   14.50
 -14  15   0  151.08   13.50
  14  15   0  153.58   12.90
  15 -15   0   10.10    6.80
 -15 -15   0    8.10    5.70
  15  15   0    9.90    5.30
 -15  15   0   17.70    6.30
 -16 -15   0    8.60    6.20
  16 -15   0    8.60    6.90
  16  15   0    7.70    6.00
 -16  15   0   17.00    6.70
   0 -16   0  394.06   22.70
   0  16   0  392.76   21.90
   1 -16   0   -4.00    4.10
  -1 -16   0   -2.90    3.80
  -1  16   0   -5.40    3.40
   1  16   0   -0.60    3.50
  -2 -16   0   38.40    5.70
   2 -16   0   29.70    5.70
  -2  16   0   41.00    5.40
   2  16   0   44.30    5.50
   3 -16   0    8.50    4.50
  -3 -16   0   12.90    4.30
  -3  16   0    4.90    4.00
   3  16   0    8.40    3.90
  -4 -16   0   91.59    9.00
   4 -16   0   81.89    9.40
   4  16   0   88.39    8.50
  -4  16   0   78.79    8.50
  -5 -16   0   36.00    5.50
   5 -16   0   36.40    5.90
   5  16   0   40.00    5.40
  -5  16   0   44.10    5.60
   6 -16   0   84.49    9.50
  -6 -16   0   72.19    8.80
   6  16   0   72.89    8.20
  -6  16   0   83.99    8.70
  -7 -16   0    4.50    4.30
   7 -16   0    6.60    4.80
  -7  16   0   -1.60    3.90
   7  16   0    8.80    4.10
  -8 -16   0    5.00    4.20
   8 -16   0    6.10    4.90
  -8  16   0    9.60    4.50
   8  16   0    5.70    4.20
  -9 -16   0   47.40    6.50
   9 -16   0   49.00    6.90
   9  16   0   48.10    6.30
  -9  16   0   53.69    6.70
 -10 -16   0    2.00    4.30
  10 -16   0   -3.60    5.00
 -10  16   0   -1.30    4.80
  10  16   0   -3.60    4.00
 -11 -16   0   70.59    9.20
  11 -16   0   61.89    8.20
 -11  16   0   64.69    7.60
  11  16   0   54.99    7.10
 -12 -16   0    9.10    5.30
  12 -16   0    1.70    5.40
  12  16   0    6.90    4.90
 -12  16   0    5.80    5.20
 -13 -16   0   61.89    7.90
  13 -16   0   68.29    8.60
 -13  16   0   65.79    8.20
  13  16   0   66.79    7.90
 -14 -16   0  164.18   14.20
  14 -16   0  175.38   15.30
 -14  16   0  204.68   14.80
  14  16   0  170.08   14.20
  15 -16   0   18.50    6.90
 -15 -16   0   13.00    6.30
 -15  16   0   25.60    6.70
  15  16   0   12.20    6.10
   0 -17   0    3.90    4.40
   0  17   0   -0.70    3.70
   1 -17   0   16.70    4.90
  -1 -17   0   19.20    4.90
   1  17   0   22.00    4.70
  -1  17   0   25.00    4.80
  -2 -17   0   10.30    4.60
   2 -17   0    6.30    4.60
  -2  17   0    6.50    4.10
   2  17   0    9.20    3.90
  -3 -17   0  234.18   15.70
   3 -17   0  232.18   15.90
   3  17   0  235.48   15.00
  -3  17   0  242.18   15.30
   4 -17   0  496.45   27.30
  -4 -17   0  475.05   26.90
  -4  17   0  456.05   26.20
   4  17   0  473.85   26.40
   5 -17   0  150.48   12.10
  -5 -17   0  135.89   11.50
   5  17   0  138.79   11.10
  -5  17   0  147.49   11.30
  -6 -17   0  153.18   12.30
   6 -17   0  145.49   12.40
   6  17   0  167.38   11.80
  -6  17   0  151.78   11.80
   7 -17   0   64.09    7.90
  -7 -17   0   78.69    9.20
   7  17   0   68.39    8.80
  -7  17   0   84.69    9.00
  -8 -17   0    2.10    4.50
   8 -17   0    3.30    5.10
   8  17   0   -1.40    4.20
  -8  17   0    5.00    4.50
   9 -17   0    2.80    5.20
  -9 -17   0    2.70    4.80
   9  17   0   -2.20    4.50
  -9  17   0  -10.10    4.30
 -10 -17   0    0.80    4.90
  10 -17   0   -3.00    5.30
 -10  17   0    5.30    4.90
  10  17   0    0.00    4.50
  11 -17   0   48.60    7.50
 -11 -17   0   44.10    6.90
  11  17   0   48.50    6.90
 -11  17   0   37.50    6.50
 -12 -17   0    0.30    5.00
  12 -17   0   11.70    5.90
 -12  17   0   10.40    5.40
  12  17   0   10.10    5.30
  13 -17   0   76.09    9.30
 -13 -17   0   57.59    8.20
  13  17   0   65.79    8.10
 -13  17   0   51.49    8.20
 -14 -17   0    2.40    6.10
  14 -17   0   -4.60    6.60
  14  17   0    9.00    5.80
 -14  17   0   16.40    6.40
   0 -18   0   -2.60    4.50
   0  18   0   -5.00    3.90
   1 -18   0    7.50    4.90
  -1 -18   0   -6.90    4.10
  -1  18   0    3.80    4.10
   1  18   0    5.40    4.00
  -2 -18   0  386.16   22.70
   2 -18   0  382.46   22.70
  -2  18   0  389.46   22.10
   2  18   0  363.66   21.70
   3 -18   0    0.80    4.80
  -3 -18   0    9.60    4.80
  -3  18   0    6.20    4.50
   3  18   0   -1.60    4.00
  -4 -18   0    7.00    4.80
   4 -18   0    5.80    5.00
  -4  18   0   10.70    4.50
   4  18   0    8.00    4.20
  -5 -18   0  282.27   17.90
   5 -18   0  294.57   18.40
  -5  18   0  286.77   17.30
   5  18   0  237.78   17.10
   6 -18   0    4.50    5.00
  -6 -18   0   -0.50    4.50
  -6  18   0    4.70    4.60
   6  18   0    8.60    4.50
  -7 -18   0  277.97   18.90
   7 -18   0  302.67   19.50
   7  18   0  301.47   18.40
  -7  18   0  317.77   18.60
  -8 -18   0   30.40    6.10
   8 -18   0   30.50    6.70
   8  18   0   24.90    5.60
  -8  18   0   29.80    5.80
   9 -18   0   90.29   11.60
  -9 -18   0  104.59   11.00
   9  18   0  115.29   10.40
  -9  18   0  105.59   10.90
  10 -18   0   11.20    6.10
 -10 -18   0   15.70    5.50
 -10  18   0   13.20    5.80
  10  18   0   14.80    5.50
 -11 -18   0   13.60    5.60
  11 -18   0   10.20    6.20
  11  18   0   30.20    5.90
 -11  18   0   26.20    6.30
  12 -18   0   13.40    6.50
 -12 -18   0   11.10    5.60
  12  18   0   -1.40    5.40
 -12  18   0    4.50    5.70
   0 -19   0   -2.60    4.80
   0  19   0   -9.60    4.20
  -1 -19   0   73.19    9.90
   1 -19   0   73.69    8.60
  -1  19   0   75.99    8.90
   1  19   0   80.39    8.90
  -2 -19   0   -3.90    4.70
   2 -19   0   -3.10    5.00
  -2  19   0   -2.40    4.60
   2  19   0    3.00    4.50
  -3 -19   0  294.87   19.00
   3 -19   0  284.17   19.10
   3  19   0  315.77   18.50
  -3  19   0  292.87   18.50
   4 -19   0   27.60    6.30
  -4 -19   0   28.40    6.00
   4  19   0   22.50    5.50
  -4  19   0   15.20    5.30
   5 -19   0  251.67   17.60
  -5 -19   0  240.88   17.20
   5  19   0  255.17   16.40
  -5  19   0  248.28   16.50
   6 -19   0   11.30    5.60
  -6 -19   0    7.60    5.10
   6  19   0   -1.40    4.60
  -6  19   0    6.30    5.30
  -7 -19   0   30.40    6.00
   7 -19   0   29.30    6.70
   7  19   0   38.20    6.20
  -7  19   0   27.70    5.90
   8 -19   0   -0.90    5.70
  -8 -19   0   -6.40    5.00
  -8  19   0    2.00    4.90
   8  19   0    0.20    4.70
  -9 -19   0   38.10    6.80
   9 -19   0   36.60    7.10
  -9  19   0   40.60    6.90
   9  19   0   32.80    6.40
  10 -19   0    6.10    6.10
 -10 -19   0   -4.70    5.40
 -10  19   0    1.00    5.40
  10  19   0   -2.90    5.30
   0 -20   0   23.30    6.30
   0  20   0   20.10    5.50
   1 -20   0   -0.70    5.50
  -1 -20   0   14.50    5.60
  -1  20   0    5.40    4.80
   1  20   0    2.50    4.80
   2 -20   0   16.20    5.80
  -2 -20   0    6.20    5.20
   2  20   0   20.10    5.10
  -2  20   0    2.50    4.80
   3 -20   0   85.89   11.10
  -3 -20   0   90.99   10.70
  -3  20   0   78.49   10.00
   3  20   0   81.19    9.90
  -4 -20   0  -11.80    4.90
   4 -20   0   -2.30    5.70
  -4  20   0    2.30    4.90
   4  20   0   -2.20    4.60
  -5 -20   0  386.86   24.20
   5 -20   0  423.56   24.80
  -5  20   0  391.56   23.80
   5  20   0  404.66   23.80
  -6 -20   0    4.10    5.80
   6 -20   0    5.00    5.80
   6  20   0    7.20    5.30
  -6  20   0   -3.70    5.20
   7 -20   0  276.57   18.60
  -7 -20   0  253.67   18.10
  -7  20   0  267.67   17.40
   7  20   0  228.98   17.20
  -8 -20   0   18.00    6.20
   8 -20   0   21.80    6.60
   8  20   0    6.90    5.70
  -8  20   0   16.20    6.10
   0 -21   0   -7.20    5.70
   0  21   0   -9.80    4.70
  -1 -21   0   85.69   11.20
   1 -21   0   93.09   11.80
   1  21   0   93.99   11.00
  -1  21   0  102.89   10.90
  -2 -21   0    1.20    5.90
   2 -21   0   -0.20    5.70
   2  21   0    9.20    5.40
  -2  21   0   -3.60    5.00
   3 -21   0  199.18   15.90
  -3 -21   0  186.28   15.30
  -3  21   0  200.18   14.70
   3  21   0  194.48   15.00
   4 -21   0   61.89    8.20
  -4 -21   0   45.20    7.70
  -4  21   0   51.69    7.50
   4  21   0   53.09    7.60
   5 -21   0   48.10    8.10
  -5 -21   0   54.59    8.10
  -5  21   0   59.49    7.80
   5  21   0   57.59    7.80
 -22   0   1  -14.50    5.70
  22   0  -1    8.70    6.90
 -21   0   1   23.00    6.10
  21   0  -1   22.80    6.70
  20   0  -1    0.20    5.70
 -20   0   1   -2.80    5.00
 -19   0   1   -2.40    5.10
  19   0  -1    9.60    5.50
  18   0  -1    2.80    4.90
 -18   0   1   -2.70    4.20
 -17   0   1  212.38   14.90
  17   0  -1  229.28   15.20
 -16   0   1   -0.40    6.70
 -15   0   1  132.99   10.40
  15   0  -1  123.19   10.40
 -14   0   1    4.80    3.40
  14   0  -1    3.30    3.50
 -13   0   1  812.72   41.90
  13   0  -1  813.42   42.00
  12   0  -1   -0.80    2.80
 -12   0   1   -1.10    2.50
 -11   0   1  319.87   17.70
  11   0  -1  325.87   17.80
 -10   0   1   -3.90    2.30
  10   0  -1    0.80    2.60
  -9   0   1 1114.79   56.89
   9   0  -1 1161.38   56.99
   8   0  -1    0.60    2.00
  -8   0   1   -1.40    1.90
   7   0  -1  360.06   18.70
  -7   0   1  359.26   18.70
   6   0  -1   -1.60    1.30
  -6   0   1    0.10    1.30
   5   0  -1  570.64   28.70
  -5   0   1  572.94   28.60
  -4   0   1   -0.90    1.20
   4   0  -1    0.20    1.30
   3   0  -1  150.48    8.30
  -3   0   1  136.99    8.60
  -3   0   1  150.98    8.20
  -2   0   1   -0.30    0.50
   2   0   1    0.10    0.70
   3   0   1   74.09    4.80
  -3   0  -1   64.89    4.60
   4   0   1   -2.30    1.80
  -4   0  -1    0.60    1.80
  -4   0  -1   -2.40    1.90
   4   0   1    0.10    1.80
   5   0   1 1441.96   70.79
  -5   0  -1 1416.16   70.89
  -6   0  -1    1.30    1.50
   6   0   1    1.00    1.60
   7   0   1 2058.19  101.29
  -7   0  -1 2043.20  101.29
   8   0   1    2.30    2.30
  -8   0  -1   -0.40    2.10
   9   0   1   27.10    3.90
  -9   0  -1   22.20    3.50
  10   0   1    2.20    2.70
 -10   0  -1   -2.20    2.40
  11   0   1 1308.47   65.49
 -11   0  -1 1297.07   65.49
 -12   0  -1    2.80    2.80
  12   0   1    3.40    3.00
 -13   0  -1   87.69    9.50
  13   0   1   89.79    7.90
 -13   0  -1   91.59    7.80
 -14   0  -1   -1.50    3.20
  14   0   1    3.00    3.60
  14   0   1    4.90    5.30
 -14   0  -1   11.20    4.30
  15   0   1  892.91   46.80
  15   0   1  892.61   46.70
 -15   0  -1  936.21   46.40
 -15   0  -1  868.31   46.60
  16   0   1    4.30    4.80
  16   0   1    0.60    4.50
 -16   0  -1    4.70    5.30
 -16   0  -1   -3.20    4.10
 -17   0  -1   61.29    7.80
  17   0   1   65.39    7.80
  18   0   1    3.60    5.40
 -18   0  -1   -6.20    4.80
 -19   0  -1   -7.70    4.70
  19   0   1   -4.50    5.30
 -20   0  -1    3.80    5.70
  20   0   1   -7.70    6.00
  21   0   1  193.98   16.00
 -21   0  -1  186.38   15.20
 -22   0  -1    4.10    6.30
  22   0   1   14.80    7.40
 -22  -1   1   46.60    8.10
  22  -1  -1   55.09    8.70
 -22   1   1   61.59    8.40
  22   1  -1   43.80    8.50
 -21  -1   1   47.00    7.60
  21  -1  -1   39.00    8.00
  21   1  -1   44.00    7.90
 -21   1   1   50.59    7.70
 -20  -1   1    2.70    5.50
  20  -1  -1   16.80    6.00
 -20   1   1   15.40    5.60
  20   1  -1    2.00    5.60
  19  -1  -1  168.08   14.00
 -19  -1   1  167.88   13.60
  19   1  -1  179.08   14.00
 -19   1   1  183.38   14.00
 -18  -1   1   51.19    6.90
  18  -1  -1   40.70    6.80
 -18   1   1   49.10    7.00
  18   1  -1   56.59    7.20
  17  -1  -1   51.29    7.10
 -17  -1   1   69.49    8.70
  17   1  -1   77.69    9.30
 -17   1   1   73.69    9.00
 -16  -1   1   61.99    8.10
  16  -1  -1   53.19    6.80
  16   1  -1   58.29    6.80
 -16   1   1   50.79    6.40
  15  -1  -1   45.00    6.00
 -15  -1   1   46.10    5.80
  15   1  -1   43.70    5.80
 -15   1   1   44.80    5.70
 -14  -1   1   24.10    4.30
  14  -1  -1   25.20    4.50
 -14   1   1   23.80    4.20
  14   1  -1   19.20    4.40
 -13  -1   1  175.78   11.20
  13  -1  -1  157.38   11.10
 -13   1   1  175.48   11.00
  13   1  -1  161.28   11.00
  12  -1  -1    0.40    3.00
 -12  -1   1    8.10    3.10
 -12   1   1    5.30    2.90
  12   1  -1    3.30    2.90
 -11  -1   1    9.70    2.80
  11  -1  -1   12.50    3.10
 -11   1   1   14.20    3.00
  11   1  -1    9.70    3.00
 -10  -1   1  154.88    9.50
  10  -1  -1  145.09    9.60
  10   1  -1  154.58   10.10
 -10   1   1  150.38    9.60
  -9  -1   1   22.20    3.30
   9  -1  -1   25.50    3.40
   9   1  -1   27.40    3.50
  -9   1   1   25.40    3.40
  -8  -1   1  193.88   11.40
   8  -1  -1  214.28   11.60
   8   1  -1  212.18   11.60
  -8   1   1  198.78   11.50
   7  -1  -1  129.49    7.80
  -7  -1   1  133.49    7.70
   7   1  -1  135.79    7.70
  -7   1   1  128.09    7.70
  -6  -1   1   13.40    1.90
   6  -1  -1   12.90    2.00
  -6   1   1   13.60    2.00
   6   1  -1   12.20    1.90
   5  -1  -1  151.78    8.30
  -5  -1   1  151.88    8.20
  -5   1   1  146.29    8.30
   5   1  -1  151.58    8.20
  -4  -1   1  548.25   26.60
   4  -1  -1  523.85   27.10
   4   1  -1  553.44   26.60
  -4   1   1  506.05   27.40
  -3  -1   1  148.69    9.00
   3  -1  -1  163.18    8.90
  -3  -1   1  161.58    8.70
  -3   1   1  157.28    9.10
  -3   1   1  163.48    8.80
   3   1  -1  161.08    8.70
   2  -1  -1   24.70    2.10
  -2   1   1   24.80    2.10
   2  -1   1  166.98    8.60
   2   1   1  149.19    8.50
  -3  -1  -1   16.20    2.90
  -3  -1  -1   13.90    2.20
   3  -1   1   13.10    2.60
   3  -1   1   16.60    2.80
   3   1   1   17.50    2.80
  -3   1  -1   15.10    2.60
   4  -1   1  277.47   15.00
  -4  -1  -1  277.67   14.90
  -4  -1  -1  272.37   14.80
   4  -1   1  269.87   14.80
   4   1   1  269.57   14.70
  -4   1  -1  289.17   14.90
   4   1   1  268.97   14.90
  -5  -1  -1  513.65   25.60
   5   1   1  492.45   25.50
  -6  -1  -1  235.58   12.50
   6  -1   1  238.98   12.80
  -6   1  -1  228.28   12.40
   6   1   1  222.78   12.40
  -7  -1  -1  663.33   34.50
   7  -1   1  694.63   34.60
  -7   1  -1  675.03   34.50
   7   1   1  700.93   34.60
  -8  -1  -1  170.58   10.00
   8  -1   1  172.28   10.10
   8   1   1  162.58   10.00
  -8   1  -1  165.08    9.90
  -9  -1  -1 1097.89   56.59
   9  -1   1 1139.09   57.29
   9  -1   1 1143.59   56.59
   9   1   1 1135.99   56.59
  -9   1  -1 1097.19   56.49
  -9   1  -1 1156.78   56.59
  10  -1   1   10.50    3.10
  10  -1   1    9.20    3.40
 -10  -1  -1    9.80    3.00
 -10   1  -1    8.80    3.10
  10   1   1    7.80    3.00
 -10   1  -1   13.20    3.00
  11  -1   1  377.66   20.30
 -11  -1  -1  380.66   20.40
  11  -1   1  367.76   20.40
  11   1   1  364.46   20.40
 -11   1  -1  386.26   20.20
 -11   1  -1  367.66   20.30
 -12  -1  -1   47.40    5.80
  12  -1   1   45.10    5.90
  12  -1   1   34.50    4.60
  12   1   1   41.00    4.90
 -12   1  -1   46.30    5.90
 -12   1  -1   36.20    4.50
  13  -1   1  371.46   20.30
  13  -1   1  362.86   20.50
 -13  -1  -1  363.36   20.50
  13   1   1  357.86   20.50
 -13   1  -1  383.36   20.20
 -13   1  -1  367.66   20.40
  14  -1   1   -0.90    3.40
  14  -1   1   -4.90    3.30
 -14  -1  -1   -0.90    3.40
  14   1   1   -3.50    3.30
 -14   1  -1    6.50    3.40
 -14   1  -1    1.60    3.30
 -15  -1  -1  162.38   12.00
  15  -1   1  164.58   11.80
  15  -1   1  158.98   11.70
  15   1   1  151.58   11.90
 -15   1  -1  170.88   11.40
 -15   1  -1  167.08   11.70
  16  -1   1    5.40    4.60
  16  -1   1    7.60    4.30
 -16  -1  -1    1.50    4.30
 -16   1  -1    4.10    4.20
  16   1   1    4.70    4.50
 -16   1  -1   -2.00    4.00
  17  -1   1  282.07   19.30
  17  -1   1  322.97   18.60
 -17  -1  -1  307.47   19.50
 -17   1  -1  318.57   18.60
  17   1   1  312.37   19.30
 -17   1  -1  295.17   19.00
 -18  -1  -1   -1.70    4.80
  18  -1   1   -2.70    5.30
  18   1   1    2.70    5.20
 -18   1  -1    4.30    5.00
 -18   1  -1   11.60    8.60
  19  -1   1  109.99   11.80
 -19  -1  -1   92.49   11.40
 -19   1  -1  105.59   11.30
  19   1   1  101.49   11.70
 -20  -1  -1   44.90    7.30
  20  -1   1   31.00    7.40
  20   1   1   48.70    7.80
 -20   1  -1   33.90    7.00
  21  -1   1    3.70    6.70
 -21  -1  -1    7.90    6.20
  21   1   1   19.50    6.90
 -21   1  -1   26.00    6.60
 -22  -1  -1  -11.50    6.20
  22  -1   1    4.90    7.00
 -22   1  -1    8.70    6.60
  22   1   1    0.70    6.90
 -22  -2   1   53.29    8.40
  22  -2  -1   37.00    8.40
 -22   2   1   43.70    7.80
  22   2  -1   63.59    9.10
  21  -2  -1    5.30    6.30
 -21  -2   1  -14.50    5.40
 -21   2   1   -2.10    5.50
  21   2  -1   -4.30    5.90
 -20  -2   1   75.29    8.80
  20  -2  -1   73.49    9.00
 -20   2   1   65.59    8.30
  20   2  -1   73.99    8.80
 -19  -2   1   40.70    6.70
  19  -2  -1   44.10    7.30
  19   2  -1   45.30    7.10
 -19   2   1   35.00    6.40
 -18  -2   1   29.30    6.00
  18  -2  -1   37.90    6.20
  18   2  -1   26.50    5.90
 -18   2   1   33.20    6.30
  17  -2  -1    1.80    4.90
 -17  -2   1   -5.90    4.20
  17   2  -1   -3.20    4.40
 -17   2   1   -1.50    5.40
 -16  -2   1  149.39   11.40
  16  -2  -1  134.99   11.60
  16   2  -1  147.19   11.80
 -16   2   1  132.89   11.10
  15  -2  -1  440.96   24.00
 -15  -2   1  428.46   24.30
  15   2  -1  403.36   25.70
 -15   2   1  435.16   24.00
  14  -2  -1  106.39    9.30
 -14  -2   1  115.29    9.20
 -14   2   1  115.79    9.10
  14   2  -1  110.79    9.20
 -13  -2   1  319.27   17.80
  13  -2  -1  308.07   17.80
  13   2  -1  306.67   17.70
 -13   2   1  307.77   17.70
 -12  -2   1   58.89    6.10
  12  -2  -1   58.49    6.30
  12   2  -1   55.09    6.40
 -12   2   1   59.39    6.20
  11  -2  -1 1399.86   71.09
 -11  -2   1 1439.26   70.99
  11   2  -1 1407.36   70.89
 -11   2   1 1421.06   70.99
 -10  -2   1  163.18   10.20
  10  -2  -1  162.78   10.20
 -10   2   1  169.68   10.20
  10   2  -1  161.38   10.20
  -9  -2   1    5.50    2.50
   9  -2  -1    8.60    2.80
   9   2  -1    7.00    2.60
  -9   2   1    8.20    2.70
  -8  -2   1  208.88   11.70
   8  -2  -1  206.08   11.80
  -8   2   1  218.38   11.80
   8   2  -1  201.98   11.70
   7  -2  -1  117.29    7.20
  -7  -2   1  113.89    6.90
   7   2  -1  111.89    7.00
  -7   2   1  115.49    7.10
  -6  -2   1   44.90    3.50
   6  -2  -1   41.20    3.80
  -6   2   1   46.90    3.80
   6   2  -1   46.10    3.60
   5  -2  -1  893.51   44.70
  -5  -2   1  896.71   44.50
   5   2  -1  905.41   44.50
  -5   2   1  894.31   44.60
  -4  -2   1   47.00    3.20
   4   2  -1   43.50    3.30
  -3  -2   1   71.79    4.10
   3   2  -1   67.59    4.10
   2  -2  -1  740.73   38.40
  -2  -2   1  753.02   38.10
  -2  -2   1  787.82   38.10
   2   2  -1  766.52   38.10
  -2   2   1  788.62   38.40
   1  -2  -1   11.10    1.60
  -1   2   1    9.30    1.60
   0  -2  -1   -0.70    0.60
   0   2   1    0.60    0.70
   1   2   1 1000.80   49.70
   2  -2   1  312.57   16.40
  -2  -2  -1  317.47   16.40
  -2   2  -1  322.67   16.30
   2   2   1  314.67   16.50
  -3  -2  -1   78.69    5.30
  -3  -2  -1   75.09    5.30
   3  -2   1   72.89    5.30
   3  -2   1   75.49    5.20
  -3   2  -1   72.79    5.20
   3   2   1   73.59    5.20
  -3   2  -1   82.39    5.20
   3   2   1   78.79    5.40
  -4  -2  -1   46.60    3.70
   4   2   1   44.50    3.60
  -5  -2  -1  509.55   25.80
   5   2   1  510.25   25.80
   6  -2   1   43.50    4.30
   6  -2   1   43.40    4.20
  -6  -2  -1   41.70    3.80
   6   2   1   43.20    3.80
  -6   2  -1   41.60    4.00
  -6   2  -1   40.80    3.90
   7  -2   1  212.28   11.90
  -7  -2  -1  220.48   11.90
   7   2   1  217.08   11.90
  -7   2  -1  215.48   11.80
  -7   2  -1  209.98   11.90
   8  -2   1  563.04   29.00
  -8  -2  -1  545.65   28.90
   8  -2   1  568.54   28.90
  -8   2  -1  573.04   28.70
  -8   2  -1  561.54   28.90
   8   2   1  562.84   28.90
   9  -2   1  533.35   28.10
  -9  -2  -1  545.35   28.10
   9  -2   1  544.05   28.20
  -9   2  -1  540.15   28.00
  -9   2  -1  550.44   27.90
   9   2   1  535.55   28.00
  10  -2   1  730.13   36.60
 -10  -2  -1  717.83   36.60
  10  -2   1  692.23   36.50
 -10   2  -1  726.23   36.40
  10   2   1  723.23   36.60
 -10   2  -1  687.93   36.50
  11  -2   1  191.78   11.30
 -11  -2  -1  175.78   11.10
  11  -2   1  168.68   11.00
  11   2   1  179.28   11.00
 -11   2  -1  168.18   10.90
 -11   2  -1  170.98   10.70
  12  -2   1  381.26   20.90
  12  -2   1  361.76   20.70
 -12  -2  -1  373.26   20.90
 -12   2  -1  406.66   20.70
  12   2   1  386.86   22.10
 -12   2  -1  374.36   20.80
  13  -2   1  406.56   21.70
  13  -2   1  399.46   21.60
 -13  -2  -1  383.26   21.70
 -13   2  -1  390.36   21.60
  13   2   1  380.96   21.70
 -13   2  -1  393.16   21.40
 -14  -2  -1   25.70    4.60
  14  -2   1   24.60    4.70
  14  -2   1   20.30    4.30
 -14   2  -1   23.50    4.30
 -14   2  -1   23.40    4.30
  14   2   1   24.40    4.60
  15  -2   1  446.16   24.10
 -15  -2  -1  440.66   24.60
  15  -2   1  418.16   24.40
 -15   2  -1  442.56   24.40
 -15   2  -1  437.56   23.90
  15   2   1  435.46   24.60
  16  -2   1    1.50    4.40
 -16  -2  -1    1.90    4.90
  16  -2   1   -3.40    3.90
  16   2   1    3.50    7.70
 -16   2  -1    1.30    4.10
 -16   2  -1    0.10    4.00
 -17  -2  -1    8.30    4.80
  17  -2   1    3.00    4.50
  17  -2   1    8.00    5.20
  17   2   1    9.70    5.20
 -17   2  -1   16.30    4.90
 -17   2  -1    8.10    4.70
  18  -2   1   -1.00    6.90
 -18  -2  -1    2.00    5.00
 -18   2  -1    3.80    8.90
  18   2   1   13.00    5.50
 -18   2  -1   13.80    5.30
 -19  -2  -1  138.39   13.00
  19  -2   1  143.59   13.10
 -19   2  -1  156.48   12.80
  19   2   1  134.99   13.30
 -20  -2  -1   73.59    8.60
  20  -2   1   63.69    8.60
  20   2   1   51.59    8.40
 -20   2  -1   63.39    8.30
 -21  -2  -1  116.19   13.10
  21  -2   1  121.29   13.80
  21   2   1  135.29   14.10
 -21   2  -1  154.38   13.80
 -22  -2  -1    3.10    6.60
  22  -2   1    4.60    7.10
  22   2   1    2.80    7.00
 -22   2  -1   -4.30    6.10
  22  -3  -1   75.29    9.50
 -22  -3   1   68.19    9.10
 -22   3   1   57.79    8.70
  22   3  -1   75.19    9.50
 -21  -3   1   49.10    7.90
  21  -3  -1   47.10    8.30
 -21   3   1   52.59    7.80
  21   3  -1   50.79    8.00
 -20  -3   1    2.70    5.30
  20  -3  -1   -3.80    5.90
 -20   3   1    0.10    5.30
  20   3  -1   -5.90    5.50
  19  -3  -1   26.60    6.50
 -19  -3   1   31.80    6.20
  19   3  -1   31.80    6.40
 -19   3   1   25.00    6.00
 -18  -3   1   34.50    6.10
  18  -3  -1   32.80    6.40
 -18   3   1   39.80    6.40
  18   3  -1   36.40    6.40
  17  -3  -1   -5.50    4.40
 -17  -3   1    0.60    4.30
 -17   3   1    7.60    5.20
 -17   3   1   10.30    8.00
  17   3  -1   -3.60    4.60
  16  -3  -1  307.47   19.60
 -16  -3   1  320.17   19.60
  16  -3  -1  348.27   19.50
 -16   3   1  334.67   19.70
  16   3  -1  321.67   19.70
 -16   3   1  334.77   19.40
  15  -3  -1  140.29   11.10
  15  -3  -1  142.09   11.20
 -15  -3   1  132.69   12.80
 -15   3   1  141.09   10.80
  15   3  -1  139.39   11.30
 -15   3   1  144.19   10.90
 -14  -3   1    2.20    3.60
  14  -3  -1    2.30    3.70
  14  -3  -1   10.00    4.10
  14   3  -1    6.20    3.70
 -14   3   1    1.00    3.30
 -14   3   1    7.10    3.90
 -13  -3   1  210.48   13.40
  13  -3  -1  194.48   13.20
  13  -3  -1  235.68   13.70
 -13   3   1  213.88   13.40
  13   3  -1  222.48   13.50
 -13   3   1  224.68   13.30
 -12  -3   1  860.31   43.20
  12  -3  -1  879.91   43.30
  12  -3  -1  823.12   43.20
 -12   3   1  859.41   43.00
  12   3  -1  816.12   43.20
 -12   3   1  817.32   43.10
  11  -3  -1  751.62   38.90
  11  -3  -1  767.12   39.00
 -11  -3   1  752.12   38.80
  11   3  -1  743.13   38.80
 -11   3   1  755.42   38.80
 -11   3   1  774.52   38.60
  10  -3  -1  669.83   34.80
 -10  -3   1  668.23   33.70
  10  -3  -1  638.14   33.70
 -10   3   1  647.34   33.70
 -10   3   1  650.03   33.70
  10   3  -1  660.23   33.60
   9  -3  -1 1296.77   64.29
  -9  -3   1 1300.67   64.19
   9   3  -1 1274.47   64.09
  -9   3   1 1266.57   64.19
  -8  -3   1 1474.65   73.49
   8  -3  -1 1468.55   73.69
   8   3  -1 1488.95   73.49
  -8   3   1 1490.65   73.69
   7  -3  -1 1938.71   96.59
  -7  -3   1 1951.70   96.49
  -7   3   1 1939.21   96.59
   7   3  -1 1983.50   96.49
  -6  -3   1  963.60   47.80
   6  -3  -1  961.30   47.90
   6   3  -1  961.40   47.80
  -6   3   1  954.60   47.90
  -5  -3   1 1503.75   74.49
   5  -3  -1 1513.75   74.69
   5   3  -1 1522.75   74.49
  -5   3   1 1494.15   74.59
  -4  -3   1   19.60    2.20
   4   3  -1   11.70    1.60
  -3  -3   1 1449.95   70.89
   3   3  -1 1433.66   70.89
  -2  -3   1   44.10    3.00
   2   3  -1   45.10    2.90
  -1  -3   1 2506.45  120.09
  -1  -3   1 2425.36  120.09
   1  -3  -1 2513.35  120.49
   1  -3  -1 2413.26  120.49
  -1   3   1 2460.05  121.29
   1   3  -1 2460.75  120.09
  -1   3   1 2504.15  120.49
   1   3  -1 2280.07  120.29
   0  -3  -1   20.30    3.40
   0  -3   1   20.10    3.80
   0  -3   1   20.80    2.40
   0  -3  -1   21.00    2.80
   0   3  -1   22.80    2.50
   0   3   1   23.30    2.90
  -1  -3  -1  177.88    9.70
  -1  -3  -1  170.98    9.70
   1  -3   1  179.08    9.50
   1  -3   1  173.38    9.50
   1   3   1  174.48    9.80
  -1   3  -1  184.18    9.60
  -2  -3  -1   62.89    4.60
  -2  -3  -1   63.89    4.80
   2  -3   1   63.89    4.50
   2  -3   1   60.89    4.60
  -2   3  -1   60.69    4.40
   2   3   1   66.29    4.80
   2   3   1   56.49    5.00
  -3  -3  -1 1058.79   51.69
   3  -3   1 1011.60   51.69
  -3   3  -1 1029.70   51.49
   3   3   1 1070.19   51.59
   4  -3   1   20.90    2.40
  -4  -3  -1   18.70    2.20
  -4   3  -1   20.90    2.60
   4   3   1   17.60    2.10
  -5  -3  -1  304.57   15.60
   5  -3   1  300.27   15.60
   5   3   1  297.97   15.50
  -5   3  -1  290.57   15.40
   6  -3   1  952.20   50.09
  -6  -3  -1 1007.00   49.70
   6  -3   1 1017.20   49.70
  -6   3  -1  992.80   49.50
   6   3   1 1002.30   49.60
   7  -3   1   25.80    3.00
  -7  -3  -1   24.30    3.10
   7  -3   1   20.20    3.00
   7   3   1   28.40    3.80
  -7   3  -1   28.50    3.70
  -7   3  -1   22.90    2.90
  -8  -3  -1  547.65   28.20
   8  -3   1  538.35   28.20
   8  -3   1  549.54   28.20
  -8   3  -1  540.45   28.10
   8   3   1  547.25   28.10
  -8   3  -1  552.34   28.00
   9  -3   1   26.60    3.80
   9  -3   1   26.70    3.80
  -9  -3  -1   32.50    3.90
   9   3   1   28.30    3.70
  -9   3  -1   37.10    4.80
  -9   3  -1   36.10    4.80
  10  -3   1  136.49    9.20
  10  -3   1  135.89    9.00
 -10  -3  -1  128.29    9.10
 -10   3  -1  137.69    8.80
 -10   3  -1  130.19    8.90
  10   3   1  133.09    8.90
  11  -3   1   55.49    6.30
 -11  -3  -1   63.99    6.30
  11  -3   1   67.69    6.20
  11   3   1   58.69    6.20
 -11   3  -1   53.39    5.90
 -11   3  -1   52.79    5.90
  12  -3   1   15.70    3.70
  12  -3   1   20.20    3.70
 -12  -3  -1   26.60    4.20
 -12   3  -1   13.80    3.30
 -12   3  -1   19.10    3.60
  12   3   1   18.60    3.80
 -13  -3  -1  553.44   29.80
  13  -3   1  535.45   29.50
  13  -3   1  576.24   29.60
 -13   3  -1  556.34   29.50
 -13   3  -1  554.94   29.20
  13   3   1  561.74   29.70
  14  -3   1   20.00    4.10
 -14  -3  -1   21.50    4.60
  14  -3   1   19.40    4.30
 -14   3  -1   23.50    4.30
 -14   3  -1   20.40    4.20
  14   3   1   17.00    4.40
  15  -3   1  383.06   22.50
  15  -3   1  401.56   22.20
 -15  -3  -1  396.76   22.90
 -15   3  -1  389.66   22.00
 -15   3  -1  397.06   22.50
  15   3   1  410.86   22.80
 -16  -3  -1   66.19    8.00
  16  -3   1   80.89    8.70
  16  -3   1  103.59    9.70
 -16   3  -1   75.79    8.80
  16   3   1   80.39    9.50
 -16   3  -1   68.59    8.40
 -17  -3  -1  610.74   33.50
  17  -3   1  594.14   33.40
  17  -3   1  620.24   32.70
  17   3   1  601.34   33.40
 -17   3  -1  617.14   33.30
 -17   3  -1  602.34   32.60
  18  -3   1   17.40    5.60
 -18  -3  -1    9.30    5.40
  18  -3   1   22.40    7.40
  18   3   1    8.30    5.50
 -18   3  -1   26.30    5.50
 -18   3  -1    8.20    5.40
  19  -3   1  108.59   12.20
 -19  -3  -1  113.29   11.70
  19   3   1  119.79   11.90
 -19   3  -1   96.99   11.20
 -20  -3  -1   70.39    8.70
  20  -3   1   61.49    9.00
  20   3   1   75.49    9.10
 -20   3  -1   62.39    8.40
 -21  -3  -1    3.80    5.90
  21  -3   1    0.30    6.70
 -21   3  -1   -4.10    6.00
  21   3   1   -1.30    6.00
 -22  -3  -1   52.09    8.70
  22  -3   1   72.19    9.90
 -22   3  -1   76.09    9.40
  22   3   1   76.89    9.80
 -22  -4   1  124.59   13.70
  22  -4  -1  137.09   14.50
 -22   4   1  102.79   12.80
  22   4  -1  108.29   13.50
  21  -4  -1   26.60    7.40
 -21  -4   1    6.30    6.20
 -21   4   1   24.00    6.60
  21   4  -1    5.40    6.50
 -20  -4   1  223.38   16.90
  20  -4  -1  240.18   17.20
 -20   4   1  239.88   17.00
  20   4  -1  227.08   17.00
 -19  -4   1   -7.20    4.90
  19  -4  -1    2.90    6.10
  19   4  -1    7.10    5.40
 -19   4   1  -10.00    4.70
 -18  -4   1    4.90    5.00
  18  -4  -1    4.50    5.50
 -18   4   1   10.00    5.00
  18   4  -1   11.20    5.40
 -17  -4   1    2.70    4.60
  17  -4  -1    7.90    6.10
  17  -4  -1    5.70    4.60
 -17   4   1   16.60    5.10
 -17   4   1    7.20    5.00
  17   4  -1    4.50    4.80
  16  -4  -1  165.88   11.90
  16  -4  -1  150.38   12.30
 -16  -4   1  173.88   12.30
 -16   4   1  162.18   12.30
  16   4  -1  151.88   12.10
 -16   4   1  161.48   12.00
  15  -4  -1  712.53   37.90
 -15  -4   1  714.83   38.10
  15  -4  -1  706.43   38.20
 -15   4   1  731.63   38.10
  15   4  -1  732.53   38.10
 -15   4   1  727.53   37.60
  14  -4  -1   80.29    8.30
  14  -4  -1   87.69    8.40
 -14  -4   1   79.99    9.10
 -14   4   1   80.69    8.00
 -14   4   1   79.19    7.90
  14   4  -1   70.79    8.60
  13  -4  -1  363.86   20.20
  13  -4  -1  350.46   20.00
 -13  -4   1  359.46   20.10
 -13   4   1  352.66   19.70
  13   4  -1  359.36   20.10
 -13   4   1  361.46   20.00
  12  -4  -1  271.87   16.50
 -12  -4   1  291.57   16.60
  12  -4  -1  300.47   16.70
  12   4  -1  292.87   16.50
 -12   4   1  305.97   16.40
 -12   4   1  279.27   16.50
  11  -4  -1  115.39    8.50
  11  -4  -1  108.69    8.50
 -11  -4   1  125.49    8.40
  11   4  -1  127.79    8.50
 -11   4   1  112.09    8.20
 -11   4   1  113.69    8.30
 -10  -4   1   12.00    3.00
  10  -4  -1   12.00    3.20
  10  -4  -1   17.90    3.40
 -10   4   1   17.00    3.20
  10   4  -1   20.20    3.20
 -10   4   1   17.00    3.10
   9  -4  -1    3.40    2.70
   9  -4  -1    1.50    2.80
  -9  -4   1    1.60    2.40
  -9   4   1    2.30    2.40
  -9   4   1    2.40    2.50
   9   4  -1   -0.90    2.30
   8  -4  -1  182.98   10.60
   8  -4  -1  170.78   10.90
  -8  -4   1  179.08   10.50
   8   4  -1  184.68   10.40
  -8   4   1  178.48   10.50
  -8   4   1  178.48   10.60
   7  -4  -1   77.59    6.10
  -7  -4   1   82.39    5.70
   7  -4  -1   76.09    6.30
   7   4  -1   79.69    5.70
  -7   4   1   79.89    6.00
  -7   4   1   81.89    5.90
   6  -4  -1   81.29    6.10
   6  -4  -1   82.79    5.70
  -6  -4   1   75.69    5.40
  -6   4   1   78.89    5.60
   6   4  -1   82.19    5.30
  -6   4   1   84.89    5.70
  -5  -4   1 1795.52   89.39
   5  -4  -1 1808.02   89.79
   5  -4  -1 1829.12   89.69
   5   4  -1 1811.72   89.39
  -5   4   1 1819.92   89.59
  -5   4   1 1820.72   89.49
  -4  -4   1  363.66   18.30
   4  -4  -1  353.26   19.20
  -4   4   1  360.86   18.70
   4   4  -1  361.06   18.30
  -3  -4   1  338.07   17.20
   3   4  -1  342.47   17.20
  -2  -4   1  353.06   17.70
   2   4  -1  347.27   17.60
  -1  -4   1  255.27   13.20
   1   4  -1  260.67   13.10
   0  -4  -1  413.16   21.10
   0  -4   1  425.26   20.80
   0   4   1  406.56   20.90
   0   4  -1  412.16   20.70
   1  -4   1 1089.99   55.59
  -1  -4  -1 1149.29   55.79
  -1   4  -1 1133.19   55.49
   1   4   1 1134.49   55.69
   2  -4   1  373.66   18.70
  -2  -4  -1  363.86   18.70
   2   4   1  362.06   18.60
  -2   4  -1  365.76   18.50
   3  -4   1  120.69    7.00
  -3  -4  -1  122.99    7.10
   3   4   1  119.59    6.90
  -3   4  -1  121.59    6.70
   4  -4   1  636.14   31.90
  -4  -4  -1  637.14   31.90
  -4   4  -1  620.94   31.70
   4   4   1  640.24   31.80
   5  -4   1 1392.26   69.29
  -5  -4  -1 1364.36   69.19
  -5   4  -1 1422.96   69.09
   5   4   1 1402.86   69.09
  -6  -4  -1  166.88    9.70
   6  -4   1  167.38    9.80
  -6   4  -1  168.38    9.50
   6   4   1  171.18    9.60
  -7  -4  -1   19.80    3.00
   7  -4   1   18.10    3.10
   7  -4   1   19.50    3.10
   7   4   1   19.90    2.90
  -7   4  -1   22.10    2.80
  -7   4  -1   21.80    3.10
   8  -4   1   57.99    5.70
  -8  -4  -1   47.80    5.50
   8  -4   1   53.89    5.70
  -8   4  -1   59.39    5.30
   8   4   1   51.39    5.30
  -8   4  -1   60.89    5.60
   9  -4   1    1.80    2.70
   9  -4   1    1.80    2.50
  -9  -4  -1    4.50    2.60
  -9   4  -1   -0.30    2.40
   9   4   1   -1.60    2.40
  -9   4  -1    0.40    2.50
 -10  -4  -1  316.97   17.70
  10  -4   1  328.17   17.70
  10  -4   1  318.87   17.70
 -10   4  -1  323.97   17.50
  10   4   1  327.07   17.70
 -10   4  -1  315.97   17.60
  11  -4   1  166.58   10.50
  11  -4   1  158.68   10.40
 -11  -4  -1  165.38   10.50
 -11   4  -1  155.18   10.00
 -11   4  -1  158.48   10.20
  11   4   1  157.38   10.40
  12  -4   1   34.40    4.40
  12  -4   1   28.60    4.20
 -12  -4  -1   28.90    4.30
  12   4   1   26.60    4.30
 -12   4  -1   26.30    3.90
 -12   4  -1   27.40    4.10
 -13  -4  -1   80.89    7.80
  13  -4   1   83.89    7.40
  13  -4   1   76.99    7.60
 -13   4  -1   75.09    7.30
  13   4   1   69.49    7.80
 -13   4  -1   73.99    7.20
 -14  -4  -1  135.79   10.70
  14  -4   1  144.59   10.10
  14  -4   1  129.79   10.20
 -14   4  -1  142.29   10.00
 -14   4  -1  137.89   10.20
  14   4   1  130.09   10.60
  15  -4   1   41.90    5.80
 -15  -4  -1   35.70    9.10
  15  -4   1   37.70    5.50
 -15   4  -1   54.29    6.90
 -15   4  -1   31.90    5.30
  16  -4   1   86.59    9.70
  16  -4   1   89.79   10.10
 -16  -4  -1   92.09   10.00
 -16   4  -1   87.39    9.50
 -16   4  -1  101.29    9.10
  16   4   1   97.09    9.90
  17  -4   1  468.25   25.90
 -17  -4  -1  468.55   26.60
  17  -4   1  446.86   26.50
 -17   4  -1  460.75   25.80
 -17   4  -1  477.65   26.50
  17   4   1  459.25   26.70
  18  -4   1  297.67   19.50
 -18  -4  -1  348.77   20.60
  18  -4   1  324.87   20.80
  18   4   1  330.67   20.60
 -18   4  -1  342.87   19.90
 -18   4  -1  323.47   20.30
 -19  -4  -1  122.29   11.80
  19  -4   1  116.49   12.80
  19   4   1  127.49   12.40
 -19   4  -1  113.89   12.10
 -20  -4  -1   15.30    6.10
  20  -4   1    4.80    6.60
 -20   4  -1   27.60    6.40
  20   4   1   29.10    6.80
 -21  -4  -1   76.29    9.20
  21  -4   1   63.59    9.80
 -21   4  -1   68.19    9.00
  21   4   1   74.29    9.40
  22  -4   1    6.70    7.50
 -22  -4  -1   14.50    7.00
 -22   4  -1   21.20    7.00
  22   4   1   -3.60    6.90
 -22  -5   1   51.99    8.40
  22  -5  -1   71.39   10.10
 -22   5   1   65.59    8.70
  22   5  -1   54.89    8.90
 -21  -5   1   14.70    6.00
  21  -5  -1   22.50    7.10
 -21   5   1   10.80    6.30
  21   5  -1   15.50    6.70
  20  -5  -1    1.30    6.30
 -20  -5   1   10.30    5.50
  20   5  -1    6.10    5.80
 -20   5   1    8.10    5.70
 -19  -5   1   46.70    7.30
  19  -5  -1   52.49    8.00
  19   5  -1   54.59    7.40
 -19   5   1   49.70    6.90
 -18  -5   1  307.47   18.90
  18  -5  -1  277.87   19.20
  18   5  -1  316.67   19.10
 -18   5   1  281.67   19.20
 -17  -5   1   60.79    7.20
  17  -5  -1   48.10    7.20
  17  -5  -1   56.49    6.50
 -17   5   1   55.09    7.00
  17   5  -1   55.99    7.00
 -17   5   1   60.19    6.80
  16  -5  -1   33.40    5.30
  16  -5  -1   37.40    6.20
 -16  -5   1   37.30    6.00
 -16   5   1   35.60    5.60
 -16   5   1   38.70    5.80
  16   5  -1   33.90    5.90
  15  -5  -1  169.08   12.70
 -15  -5   1  172.68   12.70
  15  -5  -1  170.48   12.20
  15   5  -1  184.68   12.80
 -15   5   1  184.38   12.50
 -15   5   1  166.58   12.00
 -14  -5   1  215.78   13.80
  14  -5  -1  195.58   13.40
  14  -5  -1  203.98   13.20
 -14   5   1  209.08   12.80
  14   5  -1  194.48   13.40
 -14   5   1  205.28   13.30
  13  -5  -1  114.19    8.70
 -13  -5   1   90.79    8.60
  13  -5  -1   98.39    8.30
 -13   5   1   97.89    7.90
 -13   5   1   93.59    8.20
  13   5  -1   96.89    8.50
 -12  -5   1  203.68   12.60
  12  -5  -1  194.78   12.60
  12  -5  -1  188.78   12.30
 -12   5   1  202.28   12.30
 -12   5   1  199.18   12.10
  12   5  -1  205.88   12.40
  11  -5  -1   16.20    3.30
 -11  -5   1   18.90    3.50
  11  -5  -1   13.60    3.30
 -11   5   1   13.90    3.20
  11   5  -1   15.60    3.20
 -11   5   1   16.90    3.30
  10  -5  -1  130.19    8.70
 -10  -5   1  123.99    8.40
  10  -5  -1  119.09    8.50
 -10   5   1  122.59    8.10
  10   5  -1  113.09    8.20
 -10   5   1  116.19    8.30
  -9  -5   1    2.90    2.40
   9  -5  -1    1.60    2.90
   9  -5  -1   -1.20    2.50
  -9   5   1   -2.30    2.30
   9   5  -1   -1.60    2.30
  -9   5   1   -1.90    2.40
   8  -5  -1  793.12   40.50
  -8  -5   1  790.92   40.30
   8  -5  -1  808.32   40.50
  -8   5   1  799.02   40.20
   8   5  -1  801.92   40.20
  -8   5   1  782.72   40.40
   7  -5  -1    8.00    2.90
   7  -5  -1    5.70    2.70
  -7  -5   1    8.90    2.50
  -7   5   1   10.20    2.70
   7   5  -1    8.10    2.40
  -7   5   1   10.40    2.70
  -6  -5   1  235.08   12.90
   6  -5  -1  242.18   13.40
   6  -5  -1  233.98   13.20
  -6   5   1  237.68   13.10
   6   5  -1  241.58   12.80
  -6   5   1  235.58   12.90
  -5  -5   1  890.31   45.60
   5  -5  -1  925.61   45.80
   5  -5  -1  903.21   45.90
  -5   5   1  934.11   45.70
   5   5  -1  907.31   45.60
  -5   5   1  931.31   45.80
   4  -5  -1  240.78   13.20
  -4  -5   1  239.78   12.80
   4   5  -1  245.58   12.80
  -4   5   1  250.27   13.00
   3  -5  -1  447.56   23.50
  -3  -5   1  458.25   23.20
   3   5  -1  459.25   23.10
  -3   5   1  468.95   23.20
  -2  -5   1   27.30    2.70
   2  -5  -1   28.20    3.30
  -2   5   1   27.10    2.80
   2   5  -1   28.60    2.60
   1  -5  -1  429.96   21.70
  -1  -5   1  416.96   21.40
   1   5  -1  425.06   21.30
  -1   5   1  419.26   21.40
   0  -5   1    5.40    1.50
   0  -5  -1    3.60    1.60
   0   5   1    4.60    1.40
   0   5  -1    4.80    1.30
   1  -5   1    6.80    1.60
  -1  -5  -1    7.70    1.70
   1   5   1    8.10    1.50
  -1   5  -1    7.40    1.40
   2  -5   1   13.80    2.00
  -2  -5  -1   13.90    2.00
  -2   5  -1   13.60    1.70
   2   5   1   14.60    1.90
  -3  -5  -1  363.66   18.50
   3  -5   1  354.46   18.50
   3   5   1  361.56   18.40
  -3   5  -1  350.86   18.30
  -4  -5  -1    2.00    1.70
   4  -5   1    0.40    1.60
  -4   5  -1    0.50    1.40
   4   5   1   -2.80    1.40
  -5  -5  -1  190.38   10.60
   5  -5   1  185.68   10.60
   5   5   1  188.88   10.40
  -5   5  -1  184.58   10.30
  -6  -5  -1  228.48   12.80
   6  -5   1  225.88   12.80
  -6   5  -1  231.68   12.50
   6   5   1  227.68   12.60
   7  -5   1  219.08   12.30
  -7  -5  -1  201.48   12.20
   7  -5   1  210.18   12.30
  -7   5  -1  216.38   12.00
  -7   5  -1  215.98   12.20
   7   5   1  215.78   12.10
  -8  -5  -1  100.49    7.40
   8  -5   1  105.29    7.40
   8  -5   1   95.69    7.40
   8   5   1   99.79    7.20
  -8   5  -1   94.99    7.20
  -8   5  -1   94.59    6.90
  -9  -5  -1  100.69    7.80
   9  -5   1  110.69    7.80
   9  -5   1  109.39    7.90
   9   5   1  107.79    7.70
  -9   5  -1  111.79    7.50
  -9   5  -1  113.49    7.80
  10  -5   1  408.76   22.30
  10  -5   1  416.26   22.50
 -10  -5  -1  432.46   22.50
 -10   5  -1  429.06   22.10
 -10   5  -1  402.96   22.30
  10   5   1  416.76   22.30
  11  -5   1    4.00    2.90
  11  -5   1    8.10    3.10
 -11  -5  -1    6.90    3.20
 -11   5  -1    4.80    2.80
  11   5   1    5.50    3.10
 -11   5  -1    3.20    2.70
 -12  -5  -1  428.56   23.10
  12  -5   1  428.16   22.90
  12  -5   1  419.16   22.80
  12   5   1  411.96   22.90
 -12   5  -1  411.76   22.50
 -12   5  -1  412.06   22.70
  13  -5   1   12.60    3.90
  13  -5   1    1.70    3.30
 -13  -5  -1    8.40    3.80
 -13   5  -1    2.70    3.10
 -13   5  -1   -0.30    3.00
  13   5   1    3.40    3.70
 -14  -5  -1   10.20    4.40
  14  -5   1   19.90    4.30
  14  -5   1   16.70    4.10
 -14   5  -1   16.50    3.90
  14   5   1   14.10    4.70
 -14   5  -1   16.60    4.00
  15  -5   1  173.88   13.20
 -15  -5  -1  198.48   13.60
  15  -5   1  185.68   12.90
  15   5   1  204.38   13.70
 -15   5  -1  189.18   12.70
 -15   5  -1  197.28   13.10
  16  -5   1    1.20    4.50
  16  -5   1   -3.60    4.10
 -16  -5  -1   -3.00    4.40
  16   5   1   -4.20    4.30
 -16   5  -1   -4.90    4.00
 -16   5  -1    2.60    4.10
  17  -5   1    1.00    5.00
  17  -5   1   -3.30    4.30
 -17  -5  -1    5.10    4.90
 -17   5  -1   -1.50    4.70
 -17   5  -1    6.10    4.80
  17   5   1   -2.80    4.80
 -18  -5  -1    5.20    5.20
  18  -5   1    9.70    5.80
  18  -5   1   -1.10    4.80
 -18   5  -1   15.00    5.50
 -18   5  -1   12.00    5.50
  18   5   1    9.40    5.70
  19  -5   1  218.38   21.20
 -19  -5  -1  251.97   17.40
  19   5   1  257.17   17.50
 -20  -5  -1  398.86   25.10
  20  -5   1  402.76   25.00
  20   5   1  393.16   24.90
 -20   5  -1  421.86   24.80
  21  -5   1    4.70    7.10
 -21  -5  -1    1.70    6.10
 -21   5  -1   -0.50    7.70
  21   5   1   -5.60    6.40
 -22  -5  -1   76.09    9.60
  22  -5   1   66.79   10.00
  22   5   1   65.69    9.70
 -22   5  -1   72.59    9.30
 -21  -6   1   20.10    6.90
  21  -6  -1   38.80    8.00
  21   6  -1   23.60    7.10
 -21   6   1   29.00    7.00
 -20  -6   1  254.57   18.30
  20  -6  -1  258.87   19.00
  20   6  -1  253.27   18.20
 -20   6   1  282.87   18.40
 -19  -6   1   12.00    5.60
  19  -6  -1   18.90    6.60
  19   6  -1   14.80    5.90
 -19   6   1   27.20    6.30
 -18  -6   1  134.09   11.70
  18  -6  -1  119.59   15.20
 -18   6   1  120.49   15.20
  18   6  -1  134.39   11.80
  17  -6  -1    4.60    4.60
  17  -6  -1    6.80    5.50
 -17  -6   1    4.30    4.60
 -17   6   1   -3.40    4.70
  17   6  -1    7.50    4.60
 -17   6   1    2.70    4.90
 -16  -6   1   -1.70    4.20
  16  -6  -1    6.10    5.10
  16  -6  -1   -2.60    4.20
 -16   6   1   -4.80    4.30
 -16   6   1   -1.30    4.10
  16   6  -1    2.80    4.30
 -15  -6   1  425.26   24.00
  15  -6  -1  412.86   24.20
  15  -6  -1  417.96   24.00
 -15   6   1  416.26   24.00
 -15   6   1  425.46   23.50
  15   6  -1  452.25   24.10
  14  -6  -1  524.65   28.30
 -14  -6   1  526.85   28.20
  14  -6  -1  522.55   28.10
 -14   6   1  503.35   27.70
  14   6  -1  524.95   28.20
 -14   6   1  509.15   28.10
  13  -6  -1   56.89    7.40
  13  -6  -1   52.19    6.70
  13   6  -1   42.20    8.50
 -13   6   1   48.30    6.70
 -13   6   1   62.89    6.60
  12  -6  -1    3.10    3.20
 -12  -6   1    4.90    3.30
  12  -6  -1    8.30    3.40
 -12   6   1    6.00    3.10
  12   6  -1    3.90    3.30
 -12   6   1    4.30    3.10
  11  -6  -1   57.49    6.00
  11  -6  -1   55.69    6.30
 -11  -6   1   52.79    6.00
 -11   6   1   47.90    5.80
  11   6  -1   41.30    4.90
 -11   6   1   55.29    5.60
  10  -6  -1   75.59    6.90
 -10  -6   1   82.89    6.80
  10  -6  -1   78.49    6.90
 -10   6   1   77.19    6.50
  10   6  -1   82.59    6.60
 -10   6   1   75.89    6.60
  -9  -6   1   -1.90    2.40
   9  -6  -1    2.90    2.70
   9  -6  -1   -1.60    2.60
  -9   6   1    1.90    2.40
  -9   6   1    1.00    2.40
   9   6  -1    3.90    2.50
  -8  -6   1 1107.69   54.69
   8  -6  -1 1069.89   54.79
   8  -6  -1 1081.49   54.99
   8   6  -1 1111.29   54.59
  -8   6   1 1099.09   54.69
  -8   6   1 1070.59   54.69
  -7  -6   1  229.58   12.80
   7  -6  -1  227.68   13.00
   7  -6  -1  227.88   13.20
  -7   6   1  216.28   12.70
   7   6  -1  233.08   12.70
  -7   6   1  228.98   13.00
  -6  -6   1 1133.49   56.99
   6  -6  -1 1151.08   57.19
   6  -6  -1 1102.59   57.29
   6   6  -1 1175.68   56.99
  -6   6   1 1182.78   57.09
  -6   6   1 1109.19   56.99
   5  -6  -1   -2.50    2.20
   5  -6  -1    1.40    2.40
  -5  -6   1    1.40    1.90
  -5   6   1    1.40    2.00
  -5   6   1   -0.30    2.40
   5   6  -1   -0.90    1.70
   4  -6  -1  934.31   47.60
  -4  -6   1  943.41   47.30
  -4   6   1  960.80   47.40
   4   6  -1  954.30   47.20
   3  -6  -1   21.40    2.80
  -3  -6   1   20.10    2.30
  -3   6   1   19.90    2.40
   3   6  -1   17.90    2.10
  -2  -6   1  270.57   14.20
   2  -6  -1  269.87   14.50
  -2   6   1  279.87   14.30
   2   6  -1  266.87   14.00
   1  -6  -1  111.39    6.90
  -1  -6   1  107.99    6.50
  -1   6   1  109.69    6.50
   1   6  -1  112.19    6.30
   0  -6   1  378.96   19.50
   0  -6  -1  377.36   19.70
   0   6   1  388.86   19.50
   0   6  -1  379.56   19.30
   1  -6   1    7.90    1.80
  -1  -6  -1   12.00    2.00
   1   6   1    7.40    1.70
  -1   6  -1   11.40    1.60
  -2  -6  -1   52.79    4.20
   2  -6   1   50.99    4.20
  -2   6  -1   52.19    3.80
   2   6   1   48.90    3.90
  -3  -6  -1  502.25   25.90
   3  -6   1  509.45   26.00
  -3   6  -1  508.85   25.70
   3   6   1  512.15   25.80
   4  -6   1 1201.68   60.39
  -4  -6  -1 1210.98   60.29
  -4   6  -1 1198.38   60.09
   4   6   1 1233.38   60.19
   5  -6   1  320.77   17.70
  -5  -6  -1  341.37   17.70
   5   6   1  338.67   17.60
  -5   6  -1  326.37   17.40
  -6  -6  -1  603.64   30.00
   6  -6   1  581.14   30.00
   6   6   1  573.54   29.70
  -6   6  -1  564.84   29.60
   7  -6   1   -0.70    2.50
  -7  -6  -1    2.70    2.60
   7  -6   1    3.70    3.00
  -7   6  -1    3.90    2.30
  -7   6  -1    2.60    3.60
   7   6   1   -1.60    2.30
   8  -6   1  122.59    8.30
   8  -6   1  108.19    8.00
  -8  -6  -1  116.39    8.10
  -8   6  -1  119.29    7.80
  -8   6  -1  107.59    8.00
   8   6   1  122.79    8.10
  -9  -6  -1  124.99    8.90
   9  -6   1  133.89    9.00
   9  -6   1  132.99    8.90
  -9   6  -1  142.09    8.80
  -9   6  -1  124.39    8.30
   9   6   1  118.99    8.70
  10  -6   1   70.69    6.60
 -10  -6  -1   67.89    6.40
  10  -6   1   73.09    6.40
 -10   6  -1   66.69    6.00
 -10   6  -1   65.79    6.20
  10   6   1   69.19    6.40
  11  -6   1    7.00    3.20
 -11  -6  -1    7.70    3.30
  11  -6   1    1.30    3.20
  11   6   1    4.00    3.10
 -11   6  -1    4.70    2.90
 -11   6  -1    4.00    2.80
  12  -6   1  200.68   12.70
 -12  -6  -1  194.58   12.90
  12  -6   1  206.48   12.60
 -12   6  -1  196.78   12.30
 -12   6  -1  210.88   12.50
  12   6   1  203.98   13.00
  13  -6   1   71.99    7.30
  13  -6   1   56.09    6.30
 -13  -6  -1   65.29    8.10
 -13   6  -1   65.49    6.90
  13   6   1   63.69    7.60
 -13   6  -1   59.19    6.90
  14  -6   1    7.00    3.90
 -14  -6  -1    5.40    5.50
  14  -6   1    0.90    3.70
  14   6   1    2.70    4.30
 -14   6  -1    3.70    3.70
 -14   6  -1    3.50    3.50
  15  -6   1   16.20    4.40
 -15  -6  -1   11.10    4.90
  15  -6   1   10.80    4.50
 -15   6  -1   18.20    4.50
  15   6   1    7.60    4.60
 -15   6  -1   13.30    4.20
 -16  -6  -1  276.67   17.30
  16  -6   1  252.37   17.00
  16  -6   1  261.67   16.90
 -16   6  -1  270.77   16.50
  16   6   1  261.37   17.10
 -16   6  -1  258.67   16.60
 -17  -6  -1    5.80    4.90
  17  -6   1    3.50    5.20
  17  -6   1    4.00    4.70
 -17   6  -1    8.20    4.60
  17   6   1    7.20    5.20
 -17   6  -1   10.80    5.20
  18  -6   1  152.78   13.70
  18  -6   1  154.58   12.50
 -18  -6  -1  150.98   13.30
 -18   6  -1  153.58   13.10
  18   6   1  174.68   13.20
 -18   6  -1  134.29   12.60
 -19  -6  -1   -2.30    5.20
  19  -6   1   -1.50    7.50
 -19   6  -1   -6.30    5.70
  19   6   1   -4.70    5.20
  20  -6   1  318.97   21.20
 -20  -6  -1  321.97   20.40
 -20   6  -1  290.37   20.10
  20   6   1  273.67   20.40
  21  -6   1   24.30    7.70
 -21  -6  -1   27.80    7.30
  21   6   1   17.60    7.20
 -21   6  -1   22.30    6.90
 -21  -7   1   -1.20    6.00
  21  -7  -1  -13.70    7.00
  21   7  -1    1.30    6.20
 -21   7   1   -6.90    6.10
  20  -7  -1   31.10    7.50
 -20  -7   1   22.90    6.40
  20   7  -1   21.80    6.50
 -20   7   1   25.60    6.40
 -19  -7   1   12.80    5.60
  19  -7  -1    3.00    6.20
 -19   7   1    4.80    5.60
  19   7  -1   -1.50    5.50
 -18  -7   1  367.86   21.70
 -18   7   1  333.37   23.20
  18   7  -1  329.97   21.20
  17  -7  -1   46.20    7.60
  17  -7  -1   64.39    7.00
 -17  -7   1   44.70    6.90
 -17   7   1   69.59    9.20
  17   7  -1   55.09    7.10
 -17   7   1   59.19    7.20
 -16  -7   1  220.68   14.80
  16  -7  -1  198.48   14.30
  16  -7  -1  213.48   15.20
  16   7  -1  205.98   14.60
 -16   7   1  219.48   14.70
 -16   7   1  212.68   14.20
  15  -7  -1    6.50    4.20
 -15  -7   1    7.00    4.60
  15  -7  -1   13.50    5.00
 -15   7   1   20.30    4.50
  15   7  -1   17.90    4.80
 -15   7   1   14.90    4.50
  14  -7  -1    1.70    3.60
 -14  -7   1    3.70    4.10
  14  -7  -1    0.30    3.90
  14   7  -1    1.00    3.80
 -14   7   1    2.40    3.60
 -14   7   1    4.00    3.70
  13  -7  -1    4.70    3.80
  13  -7  -1    7.70    4.00
 -13  -7   1    4.10    3.90
 -13   7   1    3.10    3.50
  13   7  -1    3.30    3.60
 -13   7   1   10.70    3.60
  12  -7  -1  413.66   22.40
  12  -7  -1  395.16   22.30
 -12  -7   1  399.16   23.10
  12   7  -1  388.96   23.20
 -12   7   1  421.26   22.00
 -12   7   1  399.96   22.20
  11  -7  -1    0.60    3.20
 -11  -7   1    2.50    3.20
  11  -7  -1    2.20    3.20
  11   7  -1    0.70    3.00
 -11   7   1    4.60    3.00
 -11   7   1    5.80    3.00
  10  -7  -1  121.49    9.00
  10  -7  -1  124.69    9.00
 -10  -7   1  128.19    9.00
  10   7  -1  125.69    8.80
 -10   7   1  130.39    8.70
 -10   7   1  131.89    8.90
   9  -7  -1  957.20   48.00
   9  -7  -1  930.41   47.80
  -9  -7   1  941.21   47.80
  -9   7   1  952.50   47.80
   9   7  -1  966.20   47.70
  -9   7   1  908.71   47.60
   8  -7  -1  468.75   25.20
   8  -7  -1  467.85   25.00
  -8  -7   1  480.05   24.90
  -8   7   1  470.25   24.90
   8   7  -1  488.65   24.80
  -8   7   1  479.25   24.80
   7  -7  -1  876.71   43.60
   7  -7  -1  854.41   43.70
  -7  -7   1  856.81   43.40
   7   7  -1  850.61   43.30
  -7   7   1  874.11   43.50
  -7   7   1  840.32   43.40
  -6  -7   1   19.80    3.00
   6  -7  -1   19.10    3.20
   6  -7  -1   18.60    3.30
  -6   7   1   18.60    3.10
  -6   7   1   16.80    2.90
   6   7  -1   15.20    2.70
   5  -7  -1  180.38   10.90
  -5  -7   1  180.08   10.40
   5  -7  -1  181.38   11.00
  -5   7   1  180.38   12.10
  -5   7   1  179.68   10.40
   5   7  -1  173.18   10.20
  -4  -7   1  217.48   11.60
   4  -7  -1  197.28   11.90
   4   7  -1  199.78   11.30
  -4   7   1  211.38   11.60
  -3  -7   1  318.37   16.80
   3  -7  -1  314.17   17.10
   3   7  -1  328.77   16.70
  -3   7   1  316.17   17.10
  -2  -7   1  223.68   12.10
   2  -7  -1  212.98   12.40
  -2   7   1  232.98   12.20
   2   7  -1  226.78   12.00
   1  -7  -1  142.39    8.70
  -1  -7   1  144.99    8.40
   1   7  -1  145.19    8.10
  -1   7   1  148.29    8.40
   0  -7   1  376.36   19.30
   0  -7  -1  370.26   19.50
   0   7  -1  373.76   19.10
   0   7   1  369.06   19.20
  -1  -7  -1  451.35   23.20
   1  -7   1  455.35   23.10
   1   7   1  445.26   23.00
  -1   7  -1  447.26   22.90
   2  -7   1  345.07   18.10
  -2  -7  -1  346.07   18.10
   2   7   1  341.77   17.90
  -2   7  -1  341.77   17.80
   3  -7   1  158.38    9.60
  -3  -7  -1  162.38    9.70
   3   7   1  165.58    9.40
  -3   7  -1  165.58    9.30
   4  -7   1   49.99    4.90
  -4  -7  -1   45.30    4.80
  -4   7  -1   44.10    4.40
   4   7   1   42.60    4.50
   5  -7   1   47.60    5.20
  -5  -7  -1   51.99    5.20
  -5   7  -1   48.00    4.50
   5   7   1   42.60    4.90
  -6  -7  -1 1280.57   63.39
   6  -7   1 1240.58   63.39
   6   7   1 1278.87   63.29
  -6   7  -1 1264.87   63.09
   7  -7   1  755.42   37.70
  -7  -7  -1  729.33   37.60
   7   7   1  725.13   37.40
  -7   7  -1  728.13   37.30
   8  -7   1 1800.52   88.59
  -8  -7  -1 1815.82   88.89
   8  -7   1 1717.13   88.79
  -8   7  -1 1764.72   88.49
   8   7   1 1748.53   88.59
  -8   7  -1 1843.12   88.59
   9  -7   1   23.00    3.90
   9  -7   1   26.40    3.90
  -9  -7  -1   20.70    3.60
  -9   7  -1   23.70    3.60
  -9   7  -1   19.80    3.30
   9   7   1   20.60    3.50
 -10  -7  -1  680.23   35.00
  10  -7   1  653.63   35.00
  10  -7   1  684.03   34.80
 -10   7  -1  659.63   34.60
 -10   7  -1  669.23   34.70
  10   7   1  690.13   34.90
  11  -7   1   42.00    5.00
 -11  -7  -1   39.60    5.00
  11  -7   1   44.00    5.90
 -11   7  -1   37.00    5.00
 -11   7  -1   43.70    5.50
  11   7   1   44.10    5.20
  12  -7   1   94.69    8.60
  12  -7   1  109.69    8.70
 -12  -7  -1  107.79    8.90
 -12   7  -1  101.59    8.20
  12   7   1  105.89    8.90
 -12   7  -1  104.19    8.30
  13  -7   1    8.50    3.90
  13  -7   1   14.90    4.00
 -13   7  -1    4.00    3.50
 -13   7  -1   11.00    3.50
  14  -7   1   13.30    4.40
 -14  -7  -1    2.20    4.10
  14  -7   1   14.70    4.10
  14   7   1    3.30    4.10
 -14   7  -1    4.80    3.70
 -14   7  -1    7.40    3.80
  15  -7   1   23.40    5.30
  15  -7   1   27.30    5.20
 -15  -7  -1   23.00    5.20
 -15   7  -1   31.20    5.10
 -15   7  -1   23.90    4.70
  15   7   1   26.00    5.40
 -16  -7  -1  139.99   12.60
  16  -7   1  165.78   12.70
  16  -7   1  157.88   12.20
  16   7   1  158.48   12.70
 -16   7  -1  155.18   11.80
 -16   7  -1  172.28   12.20
  17  -7   1  295.77   19.40
  17  -7   1  292.67   19.00
 -17  -7  -1  306.77   19.40
  17   7   1  306.67   19.20
 -17   7  -1  302.57   18.80
 -17   7  -1  305.27   18.80
 -18  -7  -1    2.80    5.00
  18  -7   1   -8.40    5.80
  18  -7   1    1.20    5.00
  18   7   1    6.10    5.30
 -18   7  -1   -8.50    4.90
 -18   7  -1   -7.50    5.20
 -19  -7  -1   16.50    6.00
  19  -7   1    2.30    6.70
  19   7   1   20.30    6.10
 -19   7  -1   12.40    5.80
 -20  -7  -1  170.78   14.50
  20  -7   1  152.68   15.90
  20   7   1  173.18   14.70
 -20   7  -1  144.29   14.20
  21  -7   1   49.50    9.00
 -21  -7  -1   39.70    7.80
 -21   7  -1   45.70    7.90
  21   7   1   39.40    8.00
  21  -8  -1   13.90    7.90
 -21  -8   1   14.00    6.30
  21   8  -1   19.90    7.00
 -21   8   1   16.80    6.70
  20  -8  -1  136.49   14.30
 -20  -8   1  109.29   12.70
  20   8  -1  107.89   12.90
 -20   8   1  116.89   12.70
 -19  -8   1   36.30    6.80
  19  -8  -1   30.20    8.00
 -19   8   1   28.30    6.40
  19   8  -1   27.60    6.70
  18  -8  -1   15.60    7.20
 -18  -8   1   10.70    5.50
  18   8  -1   11.80    5.50
 -18   8   1   16.40    5.90
  17  -8  -1  138.29   11.50
  17  -8  -1  117.09   12.50
 -17  -8   1  127.49   11.60
 -17   8   1  124.79   11.40
  17   8  -1  107.89   11.10
 -17   8   1  138.09   11.70
  16  -8  -1   24.30    5.30
  16  -8  -1   33.80    6.40
 -16  -8   1   32.50    5.90
 -16   8   1   22.50    5.50
  16   8  -1   32.20    5.70
 -16   8   1   32.40    5.90
  15  -8  -1   18.30    4.90
  15  -8  -1   24.70    5.20
 -15  -8   1   22.20    5.00
 -15   8   1   20.40    4.70
 -15   8   1   17.30    4.70
  15   8  -1   11.10    4.70
  14  -8  -1   74.99    8.80
 -14  -8   1   78.29    8.90
  14  -8  -1   89.79    9.50
 -14   8   1   99.19    8.60
  14   8  -1   87.79    9.00
 -14   8   1   98.09    8.70
  13  -8  -1   90.59    8.80
 -13  -8   1   98.19    8.90
  13  -8  -1   93.09    9.10
 -13   8   1   96.19    8.60
  13   8  -1  103.09    8.70
 -13   8   1   99.89    8.50
 -12  -8   1   75.29    7.70
  12  -8  -1   80.89    7.90
  12  -8  -1   72.69    7.80
  12   8  -1   71.09    7.50
 -12   8   1   77.89    7.40
 -12   8   1   74.49    7.40
  11  -8  -1   21.90    4.10
 -11  -8   1   18.00    4.00
  11  -8  -1   11.60    3.60
 -11   8   1   21.70    3.70
 -11   8   1   22.30    3.70
  11   8  -1   19.20    4.00
 -10  -8   1  210.68   13.10
  10  -8  -1  206.88   13.20
  10  -8  -1  221.98   13.50
  10   8  -1  223.78   13.00
 -10   8   1  227.28   13.00
 -10   8   1  213.08   13.00
   9  -8  -1   12.30    3.40
   9  -8  -1   13.80    3.50
  -9  -8   1   13.70    3.20
   9   8  -1   12.00    2.90
  -9   8   1   10.70    2.90
  -9   8   1   10.70    2.90
   8  -8  -1   36.20    4.40
   8  -8  -1   34.90    4.20
  -8  -8   1   30.70    4.00
  -8   8   1   31.80    3.90
   8   8  -1   34.50    4.60
  -8   8   1   35.40    4.10
  -7  -8   1    6.90    2.70
   7  -8  -1    4.70    2.80
   7  -8  -1    1.00    2.90
  -7   8   1   -1.70    2.60
   7   8  -1    3.10    2.40
  -7   8   1    0.80    2.40
  -6  -8   1  625.44   31.80
   6  -8  -1  621.04   31.90
   6  -8  -1  600.74   32.10
  -6   8   1  607.44   31.70
  -6   8   1  627.94   31.80
   6   8  -1  629.74   31.60
  -5  -8   1  110.09    7.40
   5  -8  -1  107.29    7.90
   5  -8  -1  110.19    9.60
   5   8  -1  106.39    7.10
  -5   8   1  108.69    7.40
  -4  -8   1  130.39    8.10
   4  -8  -1  127.69    8.60
   4   8  -1  127.59    7.90
  -4   8   1  126.59    8.10
  -3  -8   1   99.99    6.80
   3  -8  -1   93.99    7.20
  -3   8   1  101.39    6.90
   3   8  -1  103.19    6.60
   2  -8  -1  402.56   21.40
  -2  -8   1  405.16   21.10
  -2   8   1  408.36   21.10
   2   8  -1  400.86   20.80
   1  -8  -1   52.99    5.30
  -1  -8   1   54.89    4.90
  -1   8   1   50.79    4.80
   1   8  -1   55.99    4.50
   0  -8   1  180.58   11.00
   0  -8  -1  197.48   11.20
   0   8  -1  193.18   10.60
   0   8   1  195.98   10.80
  -1  -8  -1  102.99    7.20
   1  -8   1  103.79    7.10
   1   8   1  106.49    6.80
  -1   8  -1  102.79    6.60
   2  -8   1    2.80    2.40
  -2  -8  -1    2.60    2.50
  -2   8  -1    4.20    2.10
   2   8   1    1.50    2.10
  -3  -8  -1    5.70    2.70
   3  -8   1    5.80    2.60
  -3   8  -1    5.70    2.20
   3   8   1    7.10    2.50
   4  -8   1  121.99    8.40
  -4  -8  -1  125.19    8.40
  -4   8  -1  131.29    8.00
   4   8   1  127.09    8.00
  -5  -8  -1  302.87   16.90
   5  -8   1  313.77   16.90
  -5   8  -1  307.97   16.50
   5   8   1  307.77   16.70
   6  -8   1   20.40    3.40
  -6  -8  -1   20.40    3.30
  -6   8  -1   16.00    2.90
   6   8   1   22.40    3.20
  -7  -8  -1  517.15   26.90
   7  -8   1  500.35   26.90
   7   8   1  512.25   26.70
  -7   8  -1  511.85   26.50
   8  -8   1  213.08   12.80
  -8  -8  -1  209.68   12.70
   8  -8   1  210.78   12.70
  -8   8  -1  209.48   12.50
   8   8   1  202.48   12.40
  -8   8  -1  217.28   12.30
   9  -8   1  760.12   39.90
  -9  -8  -1  784.92   39.80
   9  -8   1  753.32   39.50
   9   8   1  787.72   39.70
  -9   8  -1  762.72   39.50
  -9   8  -1  782.62   39.50
  10  -8   1  773.82   40.00
 -10  -8  -1  780.92   40.30
  10  -8   1  769.62   40.30
 -10   8  -1  790.42   39.90
 -10   8  -1  760.12   39.80
  10   8   1  789.72   40.10
  11  -8   1   12.40    3.70
  11  -8   1   18.80    3.90
 -11  -8  -1    9.60    3.80
 -11   8  -1   20.10    3.50
 -11   8  -1   18.60    3.70
  11   8   1   13.30    3.80
 -12  -8  -1  318.27   24.00
  12  -8   1  364.56   19.80
  12  -8   1  351.66   20.00
 -12   8  -1  340.57   19.40
 -12   8  -1  354.36   19.60
  13  -8   1   47.40    5.80
  13  -8   1   38.10    5.50
 -13  -8  -1   41.10    5.80
 -13   8  -1   62.89    7.00
 -13   8  -1   65.69    7.00
  13   8   1   43.60    5.70
  14  -8   1    1.80    4.30
  14  -8   1    9.10    4.20
 -14  -8  -1    5.20    4.30
 -14   8  -1    5.00    4.00
 -14   8  -1    6.00    3.70
  14   8   1    2.50    4.20
 -15  -8  -1   -5.40    4.20
  15  -8   1   -5.90    4.40
  15  -8   1   -1.60    4.10
 -15   8  -1   -1.10    3.90
  15   8   1    6.20    4.50
 -15   8  -1    0.40    4.10
 -16  -8  -1   15.70    5.00
  16  -8   1    6.50    5.00
  16  -8   1   13.30    5.40
 -16   8  -1   15.00    4.90
  16   8   1   14.10    5.10
 -16   8  -1   10.20    4.70
  17  -8   1   18.00    5.40
 -17  -8  -1    7.70    5.10
  17  -8   1   11.50    5.80
 -17   8  -1    3.80    4.90
  17   8   1   10.50    5.20
 -17   8  -1    3.80    4.70
  18  -8   1   21.60    6.30
  18  -8   1   38.60    7.10
 -18  -8  -1   30.00    6.20
  18   8   1   29.00    6.60
 -18   8  -1   24.60    6.00
 -18   8  -1   29.70    6.70
 -19  -8  -1   55.59    7.70
  19  -8   1   59.69    8.80
 -19   8  -1   54.89    7.90
  19   8   1   67.59    8.30
 -20  -8  -1   55.29    8.20
  20  -8   1   80.99   12.50
  20   8   1   72.19    9.00
  21   8   1    0.10    6.80
  20  -9  -1   30.10    8.50
 -20  -9   1   13.60    6.40
  20   9  -1   21.70    6.70
 -20   9   1   23.20    6.70
  19  -9  -1   73.79   10.10
 -19  -9   1   99.79   11.40
 -19   9   1   96.89   12.50
  19   9  -1   84.69   10.90
 -18  -9   1  281.47   18.20
  18  -9  -1  254.97   19.20
  18   9  -1  258.57   17.70
 -18   9   1  273.77   18.10
  17  -9  -1   95.69   10.70
  17  -9  -1   98.49   12.00
 -17  -9   1  102.19   10.60
 -17   9   1  101.59   11.00
  17   9  -1   80.69   10.00
 -17   9   1   92.39   10.80
 -16  -9   1   69.19    9.00
  16  -9  -1   50.19    6.90
  16  -9  -1   59.79    7.70
 -16   9   1   52.69    6.80
  16   9  -1   59.59    7.10
 -16   9   1   67.79    9.00
  15  -9  -1    9.20    5.10
 -15  -9   1    0.30    4.10
  15  -9  -1   10.10    4.80
 -15   9   1    0.40    4.30
 -15   9   1   -0.20    4.40
  15   9  -1   10.40    4.50
 -14  -9   1  154.38   12.10
  14  -9  -1  175.38   12.40
  14  -9  -1  159.98   12.80
  14   9  -1  164.58   11.90
 -14   9   1  167.98   12.00
 -14   9   1  179.28   12.00
  13  -9  -1    3.30    4.00
 -13  -9   1    4.40    3.90
  13  -9  -1    6.30    4.20
  13   9  -1   -1.50    3.50
 -13   9   1    5.90    3.70
 -13   9   1    7.00    3.80
 -12  -9   1  193.38   12.30
  12  -9  -1  173.38   12.20
  12  -9  -1  172.48   12.20
 -12   9   1  181.68   11.80
  12   9  -1  175.18   11.70
 -12   9   1  164.78   11.60
  11  -9  -1   94.59    8.30
 -11  -9   1   89.19    8.10
  11  -9  -1   86.09    8.30
 -11   9   1   95.09    7.90
  11   9  -1   92.19    7.90
 -11   9   1   82.69    7.70
  10  -9  -1  111.79    8.80
 -10  -9   1  107.99    8.70
  10  -9  -1  105.99    8.50
  10   9  -1  103.49    8.30
 -10   9   1  108.59    8.30
 -10   9   1  105.89    8.20
   9  -9  -1  280.07   16.70
   9  -9  -1  306.27   17.10
  -9  -9   1  295.47   16.80
   9   9  -1  294.17   16.60
  -9   9   1  303.67   16.60
  -9   9   1  288.57   16.50
   8  -9  -1  187.38   12.00
   8  -9  -1  202.68   12.00
  -8  -9   1  199.88   11.80
  -8   9   1  191.58   11.70
  -8   9   1  185.78   11.60
   8   9  -1  195.58   11.60
   7  -9  -1  361.46   19.90
  -7  -9   1  374.76   19.90
   7  -9  -1  364.86   20.20
  -7   9   1  367.06   19.80
   7   9  -1  362.16   19.60
  -7   9   1  367.96   19.70
  -6  -9   1  217.18   12.30
   6  -9  -1  207.28   12.40
   6  -9  -1  211.58   12.60
  -6   9   1  208.68   12.30
   6   9  -1  200.88   11.90
  -6   9   1  202.38   12.00
  -5  -9   1  781.72   39.80
   5  -9  -1  796.62   40.20
  -5   9   1  770.42   39.70
   5   9  -1  782.12   39.60
   4  -9  -1  125.89    8.80
  -4  -9   1  132.59    8.40
   4   9  -1  126.39    8.00
  -4   9   1  128.39    8.30
   3  -9  -1  795.02   40.00
  -3  -9   1  770.02   39.70
   3   9  -1  779.22   39.50
  -3   9   1  790.32   39.70
   2  -9  -1  140.29    8.90
  -2  -9   1  128.09    8.50
  -2   9   1  129.29    8.30
   2   9  -1  131.19    8.10
  -1  -9   1  405.46   21.20
   1  -9  -1  412.76   21.50
   1   9  -1  395.36   20.90
  -1   9   1  396.06   21.00
   0  -9   1  166.78   10.20
   0  -9  -1  169.38   10.40
   0   9  -1  172.38    9.80
   0   9   1  174.38   10.10
   1  -9   1  149.88    9.10
  -1  -9  -1  137.29    9.20
  -1   9  -1  146.29    8.60
   1   9   1  139.29    8.70
   2  -9   1  262.17   14.50
  -2  -9  -1  245.78   14.40
   2   9   1  257.87   14.10
  -2   9  -1  261.07   14.00
  -3  -9  -1   43.30    5.30
   3  -9   1   39.30    5.00
  -3   9  -1   45.70    4.60
   3   9   1   44.60    4.70
   4  -9   1 1102.69   56.49
  -4  -9  -1 1123.89   56.49
  -4   9  -1 1128.19   56.19
   4   9   1 1137.89   56.29
   5  -9   1  106.09    7.70
  -5  -9  -1  100.19    7.60
   5   9   1  108.99    7.50
  -5   9  -1  105.19    7.30
   6  -9   1  766.92   39.00
  -6  -9  -1  760.42   38.90
  -6   9  -1  743.13   38.60
   6   9   1  765.12   38.70
   7  -9   1   10.90    3.10
  -7  -9  -1   11.20    3.30
   7   9   1   15.40    3.20
  -7   9  -1   10.80    2.80
   8  -9   1  385.56   21.70
  -8  -9  -1  405.56   21.60
   8  -9   1  396.06   22.50
  -8   9  -1  387.16   21.20
   8   9   1  405.46   21.50
  -9  -9  -1    0.40    3.20
   9  -9   1   -5.80    3.00
   9  -9   1    0.60    3.00
  -9   9  -1    0.50    2.70
   9   9   1    1.70    3.10
  -9   9  -1   -1.90    2.80
 -10  -9  -1  835.42   43.70
  10  -9   1  869.21   43.50
  10  -9   1  833.02   43.80
 -10   9  -1  837.52   43.30
 -10   9  -1  853.21   43.40
  10   9   1  849.02   43.60
  11  -9   1   18.90    4.30
  11  -9   1   17.40    4.10
 -11  -9  -1   16.10    7.10
 -11   9  -1   19.00    3.70
 -11   9  -1   15.30    3.60
 -12  -9  -1  517.35   29.00
  12  -9   1  531.35   29.00
  12  -9   1  557.54   28.70
  12   9   1  526.85   28.90
 -12   9  -1  531.75   28.50
 -12   9  -1  533.65   28.50
 -13  -9  -1   19.10    4.80
  13  -9   1   12.60    4.60
  13  -9   1   18.50    4.70
 -13   9  -1   16.70    4.50
  13   9   1   18.90    4.70
 -13   9  -1   14.60    4.20
 -14  -9  -1   95.49   10.00
  14  -9   1  107.39   10.10
  14  -9   1  137.69   10.80
 -14   9  -1  110.29    9.70
  14   9   1   95.99    9.70
 -14   9  -1  114.19    9.50
  15  -9   1   -1.00    4.70
 -15  -9  -1    8.00    4.80
  15  -9   1    4.00    5.00
 -15   9  -1    6.70    4.30
  15   9   1    3.10    4.40
 -15   9  -1    6.40    4.70
  16  -9   1    4.80    5.50
 -16  -9  -1   21.80    5.10
  16  -9   1    7.00    5.10
 -16   9  -1    8.00    4.50
  16   9   1    4.00    4.80
 -16   9  -1    0.70    4.70
  17  -9   1  221.28   15.40
  17  -9   1  216.38   15.60
 -17  -9  -1  182.48   15.30
 -17   9  -1  196.58   14.90
 -17   9  -1  214.18   14.70
  17   9   1  209.48   15.30
  18  -9   1   50.59    7.40
  18  -9   1   43.10    8.20
 -18  -9  -1   46.50    7.10
 -18   9  -1   57.79    7.10
 -18   9  -1   44.60    7.30
  18   9   1   53.59    7.30
  19  -9   1  157.48   15.10
 -19  -9  -1  171.68   14.00
  19   9   1  140.59   13.50
 -20  -9  -1    6.50    6.10
  20   9   1    0.00    6.00
 -20 -10   1   13.70    6.60
  20  10  -1    8.60    6.70
  19 -10  -1  143.39   18.50
 -19 -10   1  159.98   13.30
  19  10  -1  141.89   13.50
 -18 -10   1  201.38   15.10
  18 -10  -1  206.88   17.00
 -18  10   1  206.28   15.50
  18  10  -1  189.78   15.10
 -17 -10   1   54.49    7.60
  17 -10  -1   65.49    8.60
  17 -10  -1   51.69    7.10
 -17  10   1   55.69    7.60
 -17  10   1   62.39    7.80
  17  10  -1   70.89    9.00
  16 -10  -1   89.89    9.90
  16 -10  -1   72.29    8.60
 -16 -10   1   83.49    9.70
  16  10  -1   84.69    9.70
 -16  10   1   72.39    8.30
 -16  10   1   82.39    9.70
  15 -10  -1  128.79   11.30
  15 -10  -1  131.39   11.70
 -15 -10   1  111.99   10.70
 -15  10   1  139.99   10.90
 -15  10   1  105.29   10.60
  15  10  -1  116.79   10.50
  14 -10  -1   -0.60    4.80
 -14 -10   1    1.80    4.10
  14 -10  -1    1.30    4.50
  14  10  -1   -0.70    3.80
 -14  10   1    8.90    4.40
 -14  10   1    9.80    4.50
 -13 -10   1    2.50    3.90
  13 -10  -1    0.50    4.20
  13 -10  -1    4.20    4.20
  13  10  -1   10.40    4.00
 -13  10   1    1.90    4.00
 -13  10   1   -0.80    3.80
  12 -10  -1   23.10    4.70
 -12 -10   1   18.90    4.40
  12 -10  -1   16.00    4.60
 -12  10   1   11.70    3.90
  12  10  -1   13.20    4.00
 -12  10   1   12.60    4.20
 -11 -10   1    9.40    4.00
  11 -10  -1    1.70    3.80
  11 -10  -1    5.50    4.00
 -11  10   1   16.50    3.80
  11  10  -1    5.50    3.60
 -11  10   1   12.70    3.70
  10 -10  -1   29.80    4.70
 -10 -10   1   30.40    4.70
  10 -10  -1   28.60    4.40
  10  10  -1   31.20    4.40
 -10  10   1   40.20    4.70
 -10  10   1   36.30    4.60
   9 -10  -1   23.70    4.30
   9 -10  -1   17.60    3.90
  -9 -10   1   18.10    4.50
  -9  10   1   24.70    3.80
  -9  10   1   16.70    3.60
   9  10  -1   12.80    4.90
  -8 -10   1   23.70    3.90
   8 -10  -1   17.60    4.10
   8 -10  -1   21.20    4.10
   8  10  -1   22.10    3.90
  -8  10   1   27.00    3.90
  -8  10   1   25.60    3.90
   7 -10  -1  139.29    9.50
  -7 -10   1  134.99    9.30
   7 -10  -1  137.19    9.70
  -7  10   1  131.69    9.00
  -7  10   1  141.49    9.30
   7  10  -1  135.49    9.00
   6 -10  -1  786.62   40.80
   6 -10  -1  827.82   40.60
  -6 -10   1  774.52   40.50
  -6  10   1  801.62   40.60
  -6  10   1  784.02   40.40
   6  10  -1  778.02   40.30
  -5 -10   1  240.08   14.10
   5 -10  -1  251.37   14.50
  -5  10   1  259.27   14.10
   5  10  -1  240.38   13.80
  -4 -10   1   27.30    3.60
   4 -10  -1   31.30    4.10
   4  10  -1   25.30    3.40
  -4  10   1   25.80    3.50
   3 -10  -1  227.28   13.30
  -3 -10   1  219.28   12.90
   3  10  -1  225.38   12.50
  -3  10   1  221.58   12.70
  -2 -10   1  320.17   18.30
   2 -10  -1  348.17   18.60
  -2  10   1  338.77   18.20
   2  10  -1  346.67   18.00
  -1 -10   1   44.90    5.10
   1 -10  -1   47.60    5.60
   1  10  -1   44.70    4.60
  -1  10   1   43.60    4.90
   0 -10  -1  656.83   34.90
   0 -10   1  689.93   34.80
   0  10  -1  677.13   34.40
   0  10   1  690.03   34.60
  -1 -10  -1  329.67   18.80
   1 -10   1  347.67   18.70
   1  10   1  346.67   18.50
  -1  10  -1  357.16   18.30
   2 -10   1 1298.57   65.39
  -2 -10  -1 1297.47   65.39
   2  10   1 1302.37   65.09
  -2  10  -1 1314.77   64.99
  -3 -10  -1  612.24   32.30
   3 -10   1  617.44   32.30
  -3  10  -1  642.74   32.00
   3  10   1  623.94   32.00
  -4 -10  -1  588.24   31.10
   4 -10   1  595.14   31.10
  -4  10  -1  596.44   30.70
   4  10   1  608.74   30.80
   5 -10   1 1172.58   59.69
  -5 -10  -1 1161.18   59.59
  -5  10  -1 1215.58   59.29
   5  10   1 1177.58   59.39
  -6 -10  -1   25.60    3.80
   6 -10   1   19.70    3.80
   6  10   1   22.60    3.50
  -6  10  -1   27.90    3.60
   7 -10   1  480.35   26.20
  -7 -10  -1  496.15   26.10
   7  10   1  487.55   25.90
  -7  10  -1  488.95   25.70
  -8 -10  -1  679.73   35.20
   8 -10   1  663.93   35.30
  -8  10  -1  690.53   34.90
   8  10   1  658.73   35.00
   9 -10   1  171.08   11.50
   9 -10   1  174.88   11.50
  -9 -10  -1  165.38   11.40
   9  10   1  156.98   11.20
  -9  10  -1  163.38   11.10
  -9  10  -1  176.58   10.90
  10 -10   1  213.98   13.60
  10 -10   1  210.58   13.90
 -10  10  -1  217.48   13.40
 -10  10  -1  223.98   13.30
 -11 -10  -1   -3.30    3.60
  11 -10   1   -6.20    3.70
  11 -10   1    3.20    3.90
  11  10   1    2.60    3.70
 -11  10  -1   -2.30    3.30
 -11  10  -1    3.60    3.40
  12 -10   1  346.97   19.50
 -12 -10  -1  324.67   19.90
  12 -10   1  328.27   19.90
 -12  10  -1  336.07   19.20
  12  10   1  345.87   19.80
 -12  10  -1  339.47   19.40
  13 -10   1   37.50    5.90
  13 -10   1   33.60    5.70
 -13 -10  -1   35.90    6.00
 -13  10  -1   60.29    7.70
  13  10   1   36.90    5.80
 -13  10  -1   42.20    5.20
  14 -10   1  251.47   16.10
  14 -10   1  248.88   16.40
 -14 -10  -1  229.88   16.40
 -14  10  -1  257.77   15.60
  14  10   1  250.97   16.10
 -14  10  -1  251.77   15.90
 -15 -10  -1    0.90    4.50
  15 -10   1   -2.00    5.00
  15 -10   1    4.40    5.20
 -15  10  -1    4.90    4.30
 -15  10  -1    2.40    4.80
  15  10   1    7.20    4.70
 -16 -10  -1   13.30    5.10
  16 -10   1    8.40    5.60
  16 -10   1   10.00    5.60
  16  10   1    4.50    5.10
 -16  10  -1    7.70    4.80
 -16  10  -1   17.90    5.50
  17 -10   1    3.70    6.30
 -17 -10  -1    2.60    5.10
  17 -10   1    9.50    5.50
  17  10   1    7.50    5.50
 -17  10  -1    5.70    5.70
 -17  10  -1   10.90    5.00
 -18 -10  -1    6.10    5.40
  18 -10   1   23.90    6.80
 -18  10  -1   14.50    6.80
  18  10   1    9.20    5.70
 -19 -10  -1   -1.20    5.80
  19  10   1   -0.90    5.70
 -20 -10  -1    0.50    6.30
  20  10   1    2.70    6.40
 -19 -11   1   45.70    7.80
  19  11  -1   53.49    7.90
  18 -11  -1    4.30    7.50
 -18 -11   1    2.30    5.30
  18  11  -1    1.30    5.00
 -17 -11   1   10.60    5.10
  17 -11  -1   15.90    7.30
  17 -11  -1   12.40    5.80
 -17  11   1   -0.50    6.10
  17  11  -1    7.20    4.90
 -17  11   1    7.50    5.60
 -16 -11   1   11.40    5.10
  16 -11  -1   16.70    5.90
  16 -11  -1   22.70    6.20
  16  11  -1    6.70    5.10
 -16  11   1    9.90    5.10
 -16  11   1   17.60    5.70
  15 -11  -1   12.00    5.70
 -15 -11   1   10.00    4.70
  15 -11  -1    5.50    5.40
 -15  11   1    7.10    4.90
 -15  11   1    1.60    4.40
  15  11  -1    8.60    4.50
  14 -11  -1  215.88   15.10
  14 -11  -1  213.38   15.10
 -14 -11   1  205.68   14.60
 -14  11   1  236.68   14.80
  14  11  -1  217.28   14.50
 -14  11   1  198.98   14.20
  13 -11  -1    2.00    4.40
  13 -11  -1    1.50    4.60
 -13 -11   1    0.50    4.00
 -13  11   1    0.10    4.10
  13  11  -1    3.80    4.00
 -13  11   1   -1.40    4.10
  12 -11  -1   22.90    5.30
 -12 -11   1   22.10    4.80
  12 -11  -1   22.90    5.00
 -12  11   1   20.30    4.70
 -12  11   1   14.70    4.30
  12  11  -1   30.00    4.80
  11 -11  -1    1.30    4.10
 -11 -11   1   -0.10    3.60
  11 -11  -1    9.00    4.10
 -11  11   1    3.50    3.70
 -11  11   1    1.10    3.60
  11  11  -1    0.80    3.50
  10 -11  -1  105.39    9.10
 -10 -11   1  117.59    9.20
  10 -11  -1   97.79    9.50
 -10  11   1  113.39    9.00
 -10  11   1  106.69    8.70
  10  11  -1  118.39    8.90
   9 -11  -1  200.98   13.00
   9 -11  -1  203.78   12.70
  -9 -11   1  198.18   12.60
   9  11  -1  184.98   12.30
  -9  11   1  198.08   12.30
  -9  11   1  188.28   12.40
   8 -11  -1   20.30    4.30
   8 -11  -1   22.70    4.40
  -8  11   1   27.00    4.20
  -8  11   1   30.80    4.20
   8  11  -1   19.60    5.40
   7 -11  -1   32.70    4.80
  -7 -11   1   31.20    4.30
   7 -11  -1   35.20    4.70
   7  11  -1   27.30    4.00
  -7  11   1   31.40    4.30
  -7  11   1   34.20    4.30
   6 -11  -1    2.30    3.00
   6 -11  -1    3.70    4.50
  -6 -11   1   -0.60    2.80
   6  11  -1   -0.10    2.60
  -6  11   1   -2.10    2.70
  -5 -11   1   49.00    5.80
   5 -11  -1   53.39    6.30
   5  11  -1   53.29    5.60
  -5  11   1   55.09    5.90
  -4 -11   1 2485.05  123.09
   4 -11  -1 2504.95  123.49
  -4  11   1 2511.15  123.19
   4  11  -1 2432.96  122.79
  -3 -11   1   10.00    2.90
   3 -11  -1    2.50    2.90
  -3  11   1    6.60    2.70
   3  11  -1    4.40    2.40
  -2 -11   1  385.06   21.10
   2 -11  -1  407.36   21.50
   2  11  -1  385.36   20.70
  -2  11   1  394.86   21.00
   1 -11  -1  858.21   44.50
  -1 -11   1  887.21   44.40
   1  11  -1  877.11   44.00
  -1  11   1  862.61   44.10
   0 -11   1  268.27   14.60
   0 -11  -1  241.38   14.60
   0  11   1  246.48   14.10
   0  11  -1  253.97   14.00
  -1 -11  -1  240.28   13.70
   1 -11   1  224.88   13.40
  -1  11  -1  232.48   12.90
   1  11   1  226.58   13.10
  -2 -11  -1   55.19    5.80
   2 -11   1   55.29    5.90
  -2  11  -1   48.30    5.10
   2  11   1   58.19    5.40
   3 -11   1  323.67   18.10
  -3 -11  -1  334.87   18.10
   3  11   1  315.47   17.80
  -3  11  -1  326.87   17.60
  -4 -11  -1  216.38   13.10
   4 -11   1  221.18   13.10
  -4  11  -1  219.48   12.60
   4  11   1  210.78   12.60
   5 -11   1   95.19    8.10
  -5 -11  -1  111.39    8.10
  -5  11  -1  100.99    7.60
   5  11   1   99.69    7.70
  -6 -11  -1  115.39    8.80
   6 -11   1  119.49    9.00
   6  11   1  112.09    8.50
  -6  11  -1  117.59    8.20
   7 -11   1   78.89    7.60
  -7 -11  -1   75.79    7.40
  -7  11  -1   85.49    7.10
   7  11   1   77.89    7.40
   8 -11   1   71.49    7.50
  -8 -11  -1   70.49    7.20
  -8  11  -1   71.19    6.90
   8  11   1   64.69    7.30
   9 -11   1  154.78   11.20
  -9 -11  -1  131.39   11.20
   9 -11   1  150.48   10.90
  -9  11  -1  135.59   11.20
   9  11   1  143.39   10.60
  -9  11  -1  137.19   10.00
  10 -11   1  180.08   12.40
 -10 -11  -1  172.98   12.30
  10 -11   1  176.38   12.20
 -10  11  -1  179.68   11.80
  10  11   1  170.18   12.10
 -10  11  -1  184.98   11.80
  11 -11   1  146.69   11.00
 -11 -11  -1  134.19   11.00
  11 -11   1  145.39   11.30
  11  11   1  132.19   10.60
 -11  11  -1  132.79   10.60
 -11  11  -1  142.99   10.40
  12 -11   1  290.27   18.20
 -12 -11  -1  296.37   18.30
  12 -11   1  299.77   17.80
 -12  11  -1  290.47   17.70
  12  11   1  290.77   17.90
 -12  11  -1  301.57   17.50
  13 -11   1   40.10    6.00
 -13 -11  -1   31.50    5.80
  13 -11   1   40.20    6.30
  13  11   1   37.20    5.80
 -13  11  -1   63.89    7.20
 -13  11  -1   36.50    5.90
 -14 -11  -1   98.59   10.40
  14 -11   1  107.29   10.60
  14 -11   1   89.49   10.50
 -14  11  -1  100.09   10.40
  14  11   1  100.89   10.20
 -14  11  -1  103.69    9.80
  15 -11   1  127.89   12.00
 -15 -11  -1   99.19   10.90
  15 -11   1  110.79   11.90
 -15  11  -1  108.89   10.90
 -15  11  -1  124.79    9.90
  15  11   1   96.29   10.70
  16 -11   1   13.00    5.70
 -16 -11  -1   11.00    5.00
  16 -11   1   -1.10    5.80
  16  11   1    5.10    5.10
 -16  11  -1   -3.80    5.40
  17 -11   1   89.99    9.60
 -17 -11  -1   70.29    8.80
 -17  11  -1   80.29    9.00
  17  11   1   96.39   11.10
 -18 -11  -1  142.89   14.20
  18 -11   1  192.58   16.30
  18  11   1  165.58   14.00
 -18  11  -1  147.99   16.80
 -19 -11  -1  103.89   12.80
  19  11   1  103.19   12.40
 -18 -12   1   22.30    6.50
  18  12  -1   40.20    6.90
  17 -12  -1   55.99   11.00
 -17 -12   1   26.10    6.40
  17  12  -1   25.70    6.00
 -17  12   1   33.90    7.20
  16 -12  -1   26.40    6.50
 -16 -12   1    6.50    5.20
  16 -12  -1   10.60    6.20
 -16  12   1   16.90    6.20
  16  12  -1   15.40    5.40
  15 -12  -1  118.39   12.40
 -15 -12   1  126.79   11.30
  15 -12  -1  150.78   13.00
  15  12  -1  120.29   11.20
 -15  12   1  145.89   12.20
 -15  12   1  122.59   11.30
  14 -12  -1  203.88   14.70
  14 -12  -1  182.38   14.70
 -14 -12   1  189.38   14.00
  14  12  -1  170.88   13.50
 -14  12   1  221.98   14.50
 -14  12   1  206.98   13.70
  13 -12  -1  580.04   32.20
 -13 -12   1  569.04   32.20
  13 -12  -1  620.74   32.80
  13  12  -1  571.94   31.80
 -13  12   1  574.64   32.10
 -13  12   1  630.54   32.00
  12 -12  -1  192.88   13.40
 -12 -12   1  169.58   12.80
  12 -12  -1  182.08   13.70
 -12  12   1  193.78   12.50
  12  12  -1  165.98   12.70
 -12  12   1  198.78   13.30
  11 -12  -1  316.97   19.70
  11 -12  -1  325.47   19.30
 -11 -12   1  338.17   19.40
 -11  12   1  333.97   19.00
  11  12  -1  333.57   19.10
 -11  12   1  318.57   19.20
 -10 -12   1   17.80    4.40
  10 -12  -1   11.20    4.30
  10 -12  -1    9.40    4.50
 -10  12   1   14.50    4.30
  10  12  -1   18.40    4.10
 -10  12   1   17.10    4.10
   9 -12  -1  170.38   12.40
  -9 -12   1  176.58   12.10
   9 -12  -1  180.28   12.30
  -9  12   1  189.78   11.80
   9  12  -1  178.38   11.80
  -9  12   1  172.38   11.90
  -8 -12   1   86.69    7.90
   8 -12  -1   86.59    8.50
   8 -12  -1   79.69    8.40
  -8  12   1   71.99    7.50
  -8  12   1   79.49    7.60
   8  12  -1   81.59    7.40
   7 -12  -1   73.79    8.30
  -7 -12   1   81.49    7.50
   7 -12  -1   77.69    8.00
  -7  12   1   88.69    8.00
  -7  12   1   76.79    7.20
   7  12  -1   75.09    7.20
   6 -12  -1  405.86   22.90
  -6  12   1  418.16   22.40
   5 -12  -1   10.40    3.60
  -5 -12   1   11.40    3.60
  -5  12   1    8.70    3.30
   5  12  -1    7.50    3.20
  -4 -12   1  692.73   36.10
   4 -12  -1  711.13   36.50
  -4  12   1  693.83   36.00
   4  12  -1  689.23   35.80
  -3 -12   1   46.10    6.10
   3 -12  -1   52.99    6.40
  -3  12   1   46.60    5.60
   3  12  -1   48.10    5.40
  -2 -12   1  240.58   14.30
   2 -12  -1  249.97   14.60
  -2  12   1  241.78   14.00
   2  12  -1  240.18   13.80
  -1 -12   1    3.40    2.80
   1 -12  -1    2.70    3.00
  -1  12   1    3.40    2.70
   1  12  -1    6.90    2.70
   0 -12  -1   43.80    5.80
   0 -12   1   34.40    4.50
   0  12  -1   50.09    5.00
   0  12   1   50.49    5.30
  -1 -12  -1   60.89    6.70
   1 -12   1   68.49    6.50
   1  12   1   53.89    5.90
  -1  12  -1   69.09    5.70
  -2 -12  -1  252.37   15.10
   2 -12   1  264.57   15.10
  -2  12  -1  253.17   14.60
   2  12   1  257.87   14.70
  -3 -12  -1  472.75   25.40
   3 -12   1  479.25   25.40
  -3  12  -1  470.55   24.90
   3  12   1  465.15   25.00
  -4 -12  -1  595.44   31.60
   4 -12   1  614.14   31.70
   4  12   1  587.24   31.20
  -4  12  -1  599.44   31.20
   5 -12   1  427.26   23.60
  -5 -12  -1  429.96   23.50
  -5  12  -1  430.46   23.10
   5  12   1  432.56   23.20
  -6 -12  -1    8.60    3.60
   6 -12   1   17.00    4.10
  -6  12  -1    6.50    3.30
   6  12   1   12.20    3.50
   7 -12   1   20.90    4.40
  -7  12  -1   13.90    3.70
   8 -12   1    3.50    3.60
  -8 -12  -1   -0.70    3.40
  -8  12  -1    1.20    3.40
   8  12   1    5.40    3.60
   9 -12   1  197.48   13.50
  -9 -12  -1  195.08   13.10
  -9  12  -1  188.38   12.80
   9  12   1  212.18   13.10
  10 -12   1  112.29   10.30
  10 -12   1  113.59   10.40
 -10 -12  -1  110.19    9.80
 -10  12  -1  107.29    9.50
 -10  12  -1  114.99    9.30
  10  12   1  101.09    9.20
 -11 -12  -1  250.17   16.30
  11 -12   1  282.77   16.90
  11 -12   1  236.68   16.40
 -11  12  -1  272.07   15.70
  11  12   1  245.38   16.10
 -11  12  -1  253.87   16.10
  12 -12   1   75.79    8.90
 -12 -12  -1   46.70    6.30
  12 -12   1   52.69    6.90
  12  12   1   43.20    6.10
 -12  12  -1   37.90    5.40
 -12  12  -1   43.90    6.10
 -13 -12  -1   72.59    9.30
  13 -12   1   89.99   10.10
  13 -12   1   79.19    9.50
 -13  12  -1   77.99    9.40
  13  12   1   59.19    7.30
 -13  12  -1   86.19    8.40
 -14 -12  -1  397.96   23.00
  14 -12   1  400.56   23.20
  14 -12   1  383.66   25.10
 -14  12  -1  384.16   24.20
  14  12   1  368.36   22.70
 -15 -12  -1   58.89    7.70
  15  12   1   74.89    9.80
  16 -12   1   16.40    6.40
 -16 -12  -1    9.10    5.60
 -16  12  -1   20.50    6.30
  16  12   1   15.90    5.50
  17 -12   1   18.90    6.70
 -17 -12  -1   11.70    5.80
  17  12   1   -2.40    5.50
 -17  12  -1    9.40    6.40
  18 -12   1   -1.60    7.70
 -18 -12  -1    3.90    6.10
  18  12   1    0.20    6.00
 -18  12  -1   -1.30    6.60
 -18 -13   1   -6.10    5.90
  18  13  -1    1.40    6.00
 -17 -13   1  410.06   24.50
 -17  13   1  369.26   31.80
  17  13  -1  399.96   24.10
  16 -13  -1   62.19    9.80
 -16 -13   1   56.39    7.60
 -16  13   1   49.40   12.50
  16  13  -1   49.60    7.20
 -15 -13   1   31.90    6.10
  15 -13  -1   39.40    7.40
 -15  13   1   31.80    6.80
  15  13  -1   33.90    6.10
  14 -13  -1   34.80    6.60
 -14 -13   1   21.90    5.40
  14 -13  -1   29.20    6.30
  14  13  -1   32.00    5.90
 -14  13   1   21.50    6.00
  13 -13  -1   18.60    5.60
 -13 -13   1    5.80    4.50
  13 -13  -1    5.10    5.40
 -13  13   1   10.20    4.50
 -13  13   1   -1.60    4.90
  13  13  -1   -0.60    4.20
  12 -13  -1    7.50    5.20
 -12 -13   1    1.90    4.10
  12 -13  -1    7.30    5.10
 -12  13   1    6.40    4.90
 -12  13   1   -0.10    3.90
  12  13  -1   -3.20    3.60
  11 -13  -1  349.07   21.90
  11 -13  -1  371.16   21.50
 -11 -13   1  379.46   21.40
 -11  13   1  359.46   20.80
 -11  13   1  368.46   21.30
  11  13  -1  368.46   21.00
  10 -13  -1   98.79   10.20
 -10 -13   1   98.29    9.40
  10 -13  -1  128.59   10.40
 -10  13   1  107.99    9.00
  10  13  -1   99.49    9.00
 -10  13   1  105.09    9.80
  -9 -13   1    2.00    3.70
   9 -13  -1   -1.00    4.50
   9 -13  -1   -4.80    4.10
  -9  13   1   -3.20    3.70
   9  13  -1    4.30    3.50
  -9  13   1    2.60    4.00
   8 -13  -1   10.30    4.50
  -8 -13   1   20.20    4.30
   8 -13  -1    4.80    4.20
   8  13  -1    9.90    3.70
  -8  13   1   12.20    4.20
  -8  13   1   14.30    4.00
  -7 -13   1   82.19    7.70
   7 -13  -1   81.49    9.20
   7 -13  -1   65.39    8.40
   7  13  -1   74.29    7.20
  -7  13   1   70.59    8.30
  -7  13   1   74.59    7.50
   6 -13  -1   15.90    4.50
  -6 -13   1   26.10    4.40
  -6  13   1   21.10    4.20
   6  13  -1   23.50    4.00
  -5 -13   1   25.70    4.50
   5 -13  -1   21.70    4.80
  -5  13   1   25.60    4.20
   5  13  -1   26.60    4.00
   4 -13  -1  101.39    9.00
  -4 -13   1  104.39    9.30
  -4  13   1  101.79    8.30
   4  13  -1  101.39    8.00
   3 -13  -1  778.52   38.10
  -3 -13   1  621.14   39.90
  -3  13   1  758.42   37.50
  -2 -13   1  156.88   11.00
   2 -13  -1  166.28   11.30
  -2  13   1  162.78   10.60
   2  13  -1  153.88   10.50
   1 -13  -1  115.19    9.10
  -1 -13   1  121.09    9.00
   1  13  -1  114.29    8.20
  -1  13   1  109.09    8.40
   0 -13  -1   51.99    6.70
   0 -13   1   51.49    6.40
   0  13  -1   46.70    5.70
   0  13   1   54.49    6.10
  -1 -13  -1 1050.29   54.99
   1 -13   1 1088.39   54.99
   1  13   1 1085.39   54.59
  -1  13  -1 1087.89   54.49
  -2 -13  -1   33.30    4.90
   2 -13   1   34.00    4.80
  -2  13  -1   28.80    4.30
   2  13   1   32.80    4.40
  -3 -13  -1  347.07   19.70
   3 -13   1  354.66   19.80
   3  13   1  332.67   19.20
  -3  13  -1  350.86   19.20
   4 -13   1    2.30    3.70
  -4 -13  -1   -1.60    3.60
   4  13   1    0.60    3.30
  -4  13  -1   -3.00    2.90
   5 -13   1   20.70    4.50
  -5  13  -1   16.90    3.80
   5  13   1   19.20    4.80
   6 -13   1   42.30    5.70
  -6 -13  -1   49.20    5.90
  -6  13  -1   51.69    5.60
   6  13   1   50.49    6.60
  -7 -13  -1  207.78   13.50
   7 -13   1  202.98   13.90
  -7  13  -1  205.78   13.20
   7  13   1  208.98   13.20
   8 -13   1  190.88   13.60
  -8 -13  -1  202.68   13.40
   8  13   1  201.28   13.00
  -8  13  -1  201.38   12.90
  -9 -13  -1   62.39    7.80
   9 -13   1   52.29    7.80
   9  13   1   70.99    7.70
  -9  13  -1   65.09    7.70
 -10 -13  -1  163.08   11.60
  10 -13   1  144.89   16.90
  10 -13   1  168.98   13.70
  10  13   1  139.79   11.30
 -10  13  -1  133.69   14.00
 -11 -13  -1   40.90    6.20
  11 -13   1   44.90    6.80
 -11  13  -1   59.39    6.90
  11  13   1   41.40    5.90
 -11  13  -1   39.90    7.20
  12 -13   1   63.39    9.20
 -12 -13  -1   51.39    6.90
  12 -13   1   45.20    7.50
  12  13   1   61.09    8.10
 -12  13  -1   61.19    7.20
 -13 -13  -1  339.67   20.60
  13 -13   1  350.86   21.10
  13  13   1  325.47   20.30
 -13  13  -1  334.17   20.40
  14 -13   1   84.69   10.30
 -14 -13  -1   53.29    7.20
 -14  13  -1   51.09    7.20
  14  13   1   46.90    6.70
 -15 -13  -1  238.88   17.00
  15 -13   1  249.28   17.40
  15  13   1  242.08   16.70
 -15  13  -1  249.08   17.00
 -16 -13  -1    9.50    5.60
  16 -13   1   24.50    6.50
 -16  13  -1   22.30    6.10
  16  13   1    4.80    5.50
  17 -13   1  183.08   15.10
 -17 -13  -1  172.08   14.60
  17  13   1  144.19   14.60
 -17  13  -1  179.88   15.00
 -18 -13  -1    3.40    6.00
  18  13   1   14.60    7.00
 -18  13  -1   -5.70    6.90
 -17 -14   1    5.00    6.00
  17  14  -1    0.20    5.70
  16 -14  -1   27.30    7.50
 -16 -14   1   36.60    6.70
  16  14  -1   20.00    6.20
 -16  14   1   32.00    7.30
 -15 -14   1  375.46   22.70
  15 -14  -1  387.46   23.50
  15  14  -1  364.36   22.40
 -15  14   1  365.26   23.00
 -14 -14   1    4.30    4.90
  14 -14  -1    0.00    5.90
  14  14  -1   -0.40    4.60
 -14  14   1   -4.10    5.30
 -13 -14   1  463.55   26.30
  13 -14  -1  428.06   27.20
  13  14  -1  479.25   26.00
 -13  14   1  459.75   26.30
 -12 -14   1   10.40    4.70
 -12  14   1  -11.90    5.90
  12  14  -1   -0.70    3.90
  11 -14  -1  467.45   26.10
 -11 -14   1  443.16   25.70
  11  14  -1  458.25   25.40
  10 -14  -1   19.20    5.40
 -10 -14   1   24.30    5.00
  10 -14  -1   16.70    6.70
  10  14  -1   26.80    4.80
 -10  14   1   33.20    4.90
   9 -14  -1   79.69   10.20
  -9 -14   1  105.99    9.30
   9 -14  -1   90.79   10.00
   9  14  -1  100.49    8.60
  -9  14   1   86.19   10.60
  -9  14   1  101.89    9.00
   8 -14  -1   -0.60    4.50
   8 -14  -1   -1.80    4.90
  -8 -14   1   -1.60    3.60
  -8  14   1    6.30    4.30
   8  14  -1   -3.20    3.30
  -8  14   1    0.70    4.00
  -7 -14   1  304.87   18.50
   7 -14  -1  323.97   19.30
  -7  14   1  324.17   18.40
   7  14  -1  307.47   18.10
   6 -14  -1    4.80    4.40
  -6 -14   1    7.60    3.80
  -6  14   1    8.40    4.00
   6  14  -1   14.20    3.70
   5 -14  -1    8.90    4.20
  -5 -14   1   12.90    3.90
  -5  14   1    8.40    3.80
   5  14  -1    6.40    3.30
  -4 -14   1   29.80    4.70
   4 -14  -1   29.20    5.30
   4  14  -1   35.40    4.50
  -4  14   1   29.90    4.80
  -3 -14   1   31.10    4.80
   3 -14  -1   35.00    5.30
   3  14  -1   36.10    4.60
  -3  14   1   33.40    4.80
   2 -14  -1   99.59    9.60
  -2 -14   1  114.29    9.30
  -2  14   1  105.59    8.80
   2  14  -1  123.39    8.50
   1 -14  -1  333.97   19.60
  -1 -14   1  340.17   19.30
   1  14  -1  340.67   18.70
  -1  14   1  329.07   18.90
   0 -14  -1   52.09    6.30
   0 -14   1   44.10    5.50
   0  14  -1   49.20    6.00
   0  14   1   53.99    6.50
   1 -14   1    4.00    3.60
  -1 -14  -1   10.80    6.40
  -1  14  -1    1.80    3.10
   2 -14   1    3.50    3.80
  -2 -14  -1    4.90    4.70
  -2  14  -1    6.00    3.30
   2  14   1    4.20    4.10
   3 -14   1   22.70    5.20
  -3 -14  -1   26.50    4.70
  -3  14  -1   28.70    4.50
   3  14   1   21.30    4.30
  -4 -14  -1   28.30    5.00
   4 -14   1   30.60    5.40
  -4  14  -1   28.70    4.70
   4  14   1   33.10    4.60
  -5 -14  -1   89.09    8.50
   5 -14   1   81.69    8.70
   5  14   1   81.39    7.90
  -5  14  -1   77.29    7.80
   6 -14   1    4.60    4.10
  -6 -14  -1    2.80    3.60
   6  14   1    1.00    3.50
  -6  14  -1   -1.50    3.50
  -7 -14  -1   16.90    4.50
   7 -14   1   17.80    4.90
  -7  14  -1   18.90    4.30
   7  14   1   15.60    4.20
  -8 -14  -1  121.79   10.20
   8 -14   1  121.69   10.70
   8  14   1  115.79    9.60
  -8  14  -1  102.49    9.40
   9 -14   1   70.19    8.80
  -9 -14  -1   69.59    8.40
  -9  14  -1   58.29    7.80
   9  14   1   53.69    6.50
 -10 -14  -1   18.60    4.90
  10 -14   1   19.20    5.40
 -10  14  -1    4.70    4.40
  10  14   1   18.70    4.70
  11 -14   1   78.39    9.70
 -11 -14  -1   78.89    9.20
  11  14   1   67.39    8.80
 -11  14  -1   84.89    9.00
  12 -14   1   19.90    5.60
 -12 -14  -1    8.90    4.90
 -12  14  -1    9.70    5.10
  12  14   1   16.10    5.10
 -13 -14  -1   62.39    7.70
  13 -14   1   65.79    8.10
  13  14   1   55.89    7.10
 -13  14  -1   57.19    7.30
  14 -14   1   49.10    7.50
 -14 -14  -1   42.80    7.00
 -14  14  -1   44.10    6.90
  14  14   1   40.70    6.50
 -15 -14  -1    0.70    5.30
  15 -14   1    4.30    5.80
 -15  14  -1    9.30    5.80
  15  14   1    4.80    5.50
  16 -14   1   29.00    8.00
 -16 -14  -1   23.60    6.30
 -16  14  -1   31.10    6.70
  16  14   1   25.20    6.60
 -17 -14  -1   19.90    7.00
  17 -14   1   29.80    7.40
 -17  14  -1   19.30    7.00
  17  14   1   26.90    6.90
  16 -15  -1   67.19    8.90
 -16 -15   1   58.09    8.30
 -16  15   1   94.19   12.10
  16  15  -1   50.99    7.90
  15 -15  -1  267.57   18.20
 -15 -15   1  220.38   17.10
 -15  15   1  254.67   17.70
  15  15  -1  236.18   16.90
  14 -15  -1   31.30    6.90
 -14 -15   1   23.70    5.90
  14  15  -1   22.10    5.50
 -14  15   1   29.60    6.70
 -13 -15   1    2.50    4.70
  13 -15  -1   12.30    6.00
 -13  15   1    0.00    5.60
  13  15  -1    7.40    4.50
 -12 -15   1   17.50    5.10
  12 -15  -1   23.20    5.90
 -12  15   1   27.50    8.00
  12  15  -1   18.40    5.00
 -11 -15   1   33.10    5.70
  11 -15  -1   37.70    6.60
 -11  15   1   32.90    6.00
  11  15  -1   35.50    5.40
 -10 -15   1   77.79    8.80
  10 -15  -1   72.79    9.90
 -10  15   1   73.29    9.30
  10  15  -1   73.09    8.30
  -9 -15   1   64.49    7.90
   9 -15  -1   55.79    7.40
   9  15  -1   62.19    7.50
  -9  15   1   54.49    6.60
  -8 -15   1   29.50    5.10
   8 -15  -1   30.30    5.90
   8  15  -1   26.50    4.80
  -8  15   1   31.30    5.40
   7 -15  -1  181.98   14.10
  -7 -15   1  204.68   13.40
   7  15  -1  194.48   12.80
  -7  15   1  206.88   13.40
   6 -15  -1   38.90    6.00
  -6 -15   1   44.50    5.60
   6  15  -1   37.20    5.00
  -6  15   1   38.40    5.60
   5 -15  -1   66.09    8.50
  -5 -15   1   58.99    7.80
  -5  15   1   55.89    7.60
   5  15  -1   64.69    7.10
  -4 -15   1   31.60    5.00
   4 -15  -1   27.10    5.60
  -4  15   1   22.90    4.60
   4  15  -1   28.00    4.40
   3 -15  -1  118.59   10.50
  -3 -15   1  118.19    9.70
  -3  15   1  115.19    9.60
   3  15  -1  118.89    9.20
   2 -15  -1   34.80    5.70
  -2 -15   1   36.00    5.30
   2  15  -1   41.10    5.00
  -2  15   1   38.50    5.00
   1 -15  -1  175.18   12.30
  -1 -15   1  170.78   11.80
   1  15  -1  157.08   11.10
  -1  15   1  167.58   11.30
   0 -15   1   44.30    5.80
   0 -15  -1   44.30    6.00
   0  15  -1   54.59    6.30
   0  15   1   45.00    5.50
   1 -15   1   15.20    4.20
  -1 -15  -1    4.90    4.10
   1  15   1   11.20    3.70
  -1  15  -1    5.10    3.50
   2 -15   1    3.30    4.00
  -2 -15  -1    5.00    4.00
   2  15   1    1.10    3.50
  -2  15  -1    5.50    3.40
  -3 -15  -1   63.09    6.80
   3 -15   1   56.29    7.60
  -3  15  -1   53.59    5.90
   3  15   1   53.59    6.00
  -4 -15  -1   55.99    7.60
   4 -15   1   49.60    6.40
   4  15   1   46.10    5.60
  -4  15  -1   41.50    5.30
   5 -15   1    0.40    4.00
  -5 -15  -1    0.30    3.80
  -5  15  -1    1.70    3.60
   5  15   1   -4.40    3.50
  -6 -15  -1   12.40    4.50
   6 -15   1   15.70    4.70
   6  15   1   15.80    4.20
  -6  15  -1   10.10    4.00
   7 -15   1    0.70    4.60
  -7 -15  -1   13.50    4.50
   7  15   1    7.00    4.30
  -7  15  -1    4.10    3.90
   8 -15   1    5.80    4.40
  -8 -15  -1   -4.60    3.90
  -8  15  -1    1.50    3.90
   8  15   1    3.40    3.90
   9 -15   1   40.50    6.40
  -9 -15  -1   63.89    8.40
  -9  15  -1   36.60    5.70
   9  15   1   43.30    6.00
 -10 -15  -1    2.80    4.40
  10 -15   1    6.50    4.90
 -10  15  -1    0.50    4.50
  10  15   1    3.10    4.20
 -11 -15  -1   -2.70    4.40
  11 -15   1   -1.80    5.00
 -11  15  -1    6.10    4.80
  11  15   1    2.40    4.30
 -12 -15  -1   -3.60    4.40
  12 -15   1    2.90    5.20
  12  15   1   -1.60    4.50
 -12  15  -1   -5.90    4.60
 -13 -15  -1  128.69   11.70
  13 -15   1  102.09   12.40
 -13  15  -1  140.29   11.90
  13  15   1  113.79   11.40
 -14 -15  -1   -1.30    5.20
  14 -15   1    2.20    5.80
 -14  15  -1   -1.70    5.20
  14  15   1    3.90    5.30
  15 -15   1  190.78   16.40
 -15 -15  -1  206.38   15.70
  15  15   1  216.88   15.80
 -15  15  -1  223.08   16.00
 -16 -15  -1   24.80    6.90
  16 -15   1   15.20    7.10
  16  15   1   22.60    6.60
 -16  15  -1   24.40    7.00
  15 -16  -1  111.99   13.10
 -15 -16   1   82.19    9.80
  15  16  -1  101.29   11.90
 -15  16   1  134.69   13.00
  14 -16  -1   -5.00    6.60
 -14 -16   1   10.00    5.40
 -14  16   1   18.70    6.50
  14  16  -1    8.80    5.30
 -13 -16   1  293.57   18.90
  13 -16  -1  308.87   20.10
 -13  16   1  291.97   19.60
  13  16  -1  287.47   18.70
  12 -16  -1   14.90    6.00
 -12 -16   1    2.70    4.90
  12  16  -1   11.60    4.90
 -12  16   1    9.90    5.30
 -11 -16   1   79.59    9.30
  11 -16  -1   63.19    8.60
 -11  16   1   87.39   10.10
  11  16  -1   75.19    8.80
 -10 -16   1  117.09   10.40
  10 -16  -1  100.69   11.10
  10  16  -1  103.09    9.70
 -10  16   1  110.69   10.80
  -9 -16   1   57.09    6.80
   9 -16  -1   46.90    7.30
   9  16  -1   49.40    6.10
  -9  16   1   52.59    6.60
   8 -16  -1   17.80    5.50
  -8 -16   1   11.20    4.50
   8  16  -1   13.20    4.40
  -8  16   1    8.70    4.60
   7 -16  -1  111.19   10.60
  -7 -16   1   86.39    9.30
   7  16  -1   99.59    8.70
  -7  16   1   83.29    9.30
   6 -16  -1  110.69   10.90
  -6 -16   1  124.09   10.30
   6  16  -1  116.69    9.50
  -6  16   1  124.29   10.60
  -5 -16   1   51.39    6.30
   5 -16  -1   56.49    7.00
   5  16  -1   56.19    7.00
  -5  16   1   62.39    7.80
   4 -16  -1  211.68   14.80
  -4 -16   1  206.48   14.10
   4  16  -1  221.58   13.70
  -4  16   1  216.18   14.10
   3 -16  -1   48.90    6.50
  -3 -16   1   42.70    5.90
  -3  16   1   46.30    5.80
   3  16  -1   50.39    6.70
  -2 -16   1    7.30    4.10
   2 -16  -1    2.70    4.30
   2  16  -1    5.30    3.70
  -2  16   1   12.60    4.10
  -1 -16   1  125.69   10.60
   1 -16  -1  135.49   10.90
  -1  16   1  120.79   10.20
   1  16  -1  130.09    9.90
   0 -16   1    8.70    4.30
   0 -16  -1    9.60    4.60
   0  16  -1   16.90    3.90
   0  16   1   16.20    4.20
  -1 -16  -1    7.00    4.40
   1 -16   1    4.20    4.10
   1  16   1   10.00    4.00
  -1  16  -1    9.80    3.90
  -2 -16  -1   18.00    4.80
   2 -16   1   12.00    4.70
  -2  16  -1   14.80    4.00
   2  16   1    8.40    4.10
  -3 -16  -1   70.39    8.90
   3 -16   1   85.49    9.00
  -3  16  -1   88.49    8.30
   3  16   1   85.19    8.50
  -4 -16  -1   86.19    9.30
   4 -16   1   82.29    9.40
  -4  16  -1   93.99    8.50
   4  16   1   95.39    8.70
  -5 -16  -1  199.98   13.90
   5 -16   1  208.68   14.10
  -5  16  -1  202.88   13.30
   5  16   1  184.48   13.20
   6 -16   1  128.19   10.50
  -6 -16  -1  106.89   10.30
  -6  16  -1  112.79    9.70
   6  16   1   96.19    9.50
   7 -16   1   51.19    6.90
  -7 -16  -1   46.70    6.60
   7  16   1   62.99    8.00
  -7  16  -1   52.59    6.10
  -8 -16  -1   26.60    5.40
   8 -16   1   28.40    5.80
  -8  16  -1   20.80    5.00
   8  16   1   26.40    5.40
   9 -16   1   28.50    5.70
  -9 -16  -1   26.50    5.90
  -9  16  -1   35.00    5.80
   9  16   1   32.70    5.70
 -10 -16  -1    1.40    4.80
  10 -16   1    8.20    5.20
 -10  16  -1   12.70    4.90
  10  16   1    5.40    4.50
 -11 -16  -1  139.09   12.00
  11 -16   1  143.79   13.10
  11  16   1  144.59   11.90
 -11  16  -1  121.49   11.70
  12 -16   1   43.20    7.40
 -12 -16  -1   48.60    7.10
 -12  16  -1   49.90    7.10
  12  16   1   41.90    6.70
  13 -16   1   89.49   11.70
 -13 -16  -1   94.19   11.40
 -13  16  -1  113.19   11.40
  13  16   1   95.99   10.40
 -14 -16  -1   40.90    7.10
  14 -16   1   58.19    7.90
  14  16   1   47.50    7.30
 -14  16  -1   37.00    7.30
  15 -16   1    5.50    6.80
 -15 -16  -1   25.70    6.60
  15  16   1   21.90    6.50
 -15  16  -1   19.10    6.60
 -14 -17   1   68.09    8.90
  14 -17  -1   66.89    9.30
  14  17  -1   85.49   11.00
 -14  17   1   72.49    8.90
  13 -17  -1   11.20    6.90
 -13 -17   1    9.90    5.50
  13  17  -1    7.40    5.40
 -13  17   1   12.40    6.10
  12 -17  -1    2.50    6.10
 -12 -17   1   11.90    5.00
 -12  17   1   -6.50    5.30
  12  17  -1   -2.50    4.80
  11 -17  -1    0.80    5.60
 -11 -17   1  -10.70    4.50
 -11  17   1   -4.90    5.20
  11  17  -1    5.10    4.80
  10 -17  -1   69.99    8.50
 -10 -17   1   73.09    9.40
  10  17  -1   66.79    8.80
 -10  17   1   74.09    9.80
   9 -17  -1   11.80    5.70
  -9 -17   1    5.00    4.70
   9  17  -1    2.40    4.20
  -9  17   1   18.10    5.30
   8 -17  -1   87.19   10.40
  -8 -17   1   77.69    9.20
  -8  17   1   78.49    9.30
   8  17  -1   76.39    8.70
   7 -17  -1   10.60    5.50
  -7 -17   1   18.40    5.00
   7  17  -1   22.70    4.90
  -7  17   1   21.00    5.30
  -6 -17   1   65.89    7.40
   6 -17  -1   69.29    8.10
  -6  17   1   59.09    7.10
   6  17  -1   78.49    8.00
   5 -17  -1   61.79    7.50
  -5 -17   1   51.49    6.80
   5  17  -1   67.39    7.70
  -5  17   1   72.99    8.40
  -4 -17   1   -2.70    4.00
   4 -17  -1    5.40    4.90
  -4  17   1   -3.40    4.20
   4  17  -1   -4.60    3.50
   3 -17  -1   25.90    5.60
  -3 -17   1   21.40    5.00
  -3  17   1   21.70    4.80
   3  17  -1   21.30    4.70
   2 -17  -1   37.10    6.20
  -2 -17   1   33.30    5.40
  -2  17   1   25.30    5.00
   2  17  -1   32.30    4.90
   1 -17  -1   51.59    6.70
  -1 -17   1   41.50    6.30
  -1  17   1   49.50    6.30
   1  17  -1   56.19    7.00
   0 -17   1    5.30    4.30
   0 -17  -1   -2.30    4.20
   0  17   1    0.20    3.80
   0  17  -1    4.80    3.80
   1 -17   1   37.60    6.00
  -1 -17  -1   36.90    6.00
  -1  17  -1   36.40    5.40
   1  17   1   40.50    5.70
   2 -17   1    5.40    4.30
  -2 -17  -1   11.90    4.60
  -2  17  -1    9.20    4.00
   2  17   1   13.70    4.20
  -3 -17  -1    7.60    4.60
   3 -17   1   10.50    4.70
  -3  17  -1    0.50    3.80
   3  17   1    5.40    4.20
  -4 -17  -1  458.15   26.60
   4 -17   1  470.25   26.60
  -4  17  -1  463.25   25.80
   4  17   1  472.25   26.10
  -5 -17  -1  352.76   21.50
   5 -17   1  363.16   21.80
   5  17   1  358.26   20.90
  -5  17  -1  357.46   20.90
  -6 -17  -1  276.57   18.30
   6 -17   1  308.27   18.60
  -6  17  -1  299.67   17.90
   6  17   1  284.17   17.90
  -7 -17  -1   60.79    7.60
   7 -17   1   59.29    7.50
  -7  17  -1   67.39    8.20
   7  17   1   70.59    8.90
   8 -17   1   51.09    7.00
  -8 -17  -1   54.09    7.30
   8  17   1   50.39    6.50
  -8  17  -1   49.60    6.50
   9 -17   1   18.90    5.60
  -9 -17  -1    2.00    4.90
  -9  17  -1   -0.90    4.80
   9  17   1   15.90    5.20
  10 -17   1   67.99    7.80
 -10 -17  -1   49.50    7.30
 -10  17  -1   59.99    7.40
  10  17   1   59.79    7.30
 -11 -17  -1   24.00    6.30
  11 -17   1   31.50    6.60
  11  17   1   42.20    6.40
 -11  17  -1   36.40    6.40
  12 -17   1   35.90    7.20
 -12 -17  -1   33.60    6.60
 -12  17  -1   43.30    6.70
  12  17   1   34.40    6.50
  13 -17   1   14.70    6.90
 -13 -17  -1   15.80    5.90
  13  17   1   18.00    6.10
 -13  17  -1   15.50    6.20
 -14 -17  -1   -9.60    5.70
 -14  17  -1   -1.10    5.90
  14  17   1   -1.40    5.70
 -12 -18   1    8.40    5.60
  12 -18  -1    2.10    6.40
 -12  18   1   12.80    6.00
  12  18  -1    8.40    5.80
 -11 -18   1   32.20    6.50
  11 -18  -1   39.90    7.60
 -11  18   1   45.70    7.00
  11  18  -1   36.20    6.30
  10 -18  -1  205.08   15.20
 -10 -18   1  186.48   14.30
  10  18  -1  165.58   13.70
 -10  18   1  195.18   14.50
   9 -18  -1   26.80    6.40
  -9 -18   1   14.60    5.20
  -9  18   1   18.20    5.50
   9  18  -1   18.50    5.20
  -8 -18   1  116.09   10.90
   8 -18  -1   98.19   11.80
   8  18  -1   99.39   10.20
  -8  18   1  132.59   11.00
   7 -18  -1   10.00    5.70
  -7 -18   1   15.00    5.20
   7  18  -1   21.40    4.80
  -7  18   1   13.20    5.10
  -6 -18   1  218.28   14.30
   6 -18  -1  185.38   14.80
   6  18  -1  185.88   13.50
  -6  18   1  200.48   14.20
   5 -18  -1  105.09   10.60
  -5 -18   1   80.09    9.60
  -5  18   1  101.09    9.80
   5  18  -1   64.39    8.90
   4 -18  -1  197.98   14.40
  -4 -18   1  177.28   13.60
  -4  18   1  188.68   13.30
   4  18  -1  179.08   12.90
   3 -18  -1   59.99    7.50
  -3 -18   1   75.29    8.80
  -3  18   1   67.99    8.40
   3  18  -1   49.60    6.50
  -2 -18   1   21.70    5.40
   2 -18  -1   18.30    5.40
   2  18  -1   31.60    5.40
  -2  18   1   33.00    5.50
  -1 -18   1    4.00    4.60
   1 -18  -1    2.10    5.00
   1  18  -1   -2.70    3.80
  -1  18   1   -7.30    4.10
   0 -18   1    2.90    4.50
   0 -18  -1    6.50    4.90
   0  18   1   13.50    4.70
   0  18  -1    4.00    4.10
   1 -18   1    6.40    4.90
  -1 -18  -1   10.70    4.90
  -1  18  -1   11.40    4.10
   1  18   1    7.60    4.40
   2 -18   1  131.39   11.80
  -2 -18  -1  137.99   11.90
   2  18   1  131.69   11.00
  -2  18  -1  136.69   10.90
   3 -18   1  167.68   13.30
  -3 -18  -1  184.38   13.60
  -3  18  -1  172.68   12.70
   3  18   1  167.38   12.50
  -4 -18  -1   40.80    6.50
   4 -18   1   32.50    6.20
   4  18   1   45.00    6.00
  -4  18  -1   34.70    5.60
   5 -18   1  284.27   18.70
  -5 -18  -1  292.57   18.60
   5  18   1  292.97   18.00
  -5  18  -1  276.37   17.70
  -6 -18  -1   10.30    5.00
   6 -18   1   11.50    5.00
  -6  18  -1    1.60    4.50
   6  18   1   -2.70    4.10
  -7 -18  -1   -2.80    4.70
   7 -18   1    1.20    5.00
  -7  18  -1   -1.40    4.20
   7  18   1   -6.40    4.10
  -8 -18  -1   66.59    8.10
   8 -18   1   69.49    8.20
  -8  18  -1   70.19    9.30
   8  18   1   63.19    7.60
   9 -18   1    8.30    5.60
  -9 -18  -1    7.30    5.50
  -9  18  -1   17.80    5.30
   9  18   1    8.10    5.00
  10 -18   1   31.70    6.50
 -10 -18  -1   22.00    6.30
 -10  18  -1   21.40    6.00
  10  18   1   13.00    5.60
  11 -18   1    7.90    6.10
 -11 -18  -1   16.30    5.90
  11  18   1   -5.10    5.00
 -11  18  -1    5.80    5.70
 -12 -18  -1    9.20    6.30
  12 -18   1   27.90    7.00
 -12  18  -1   27.90    6.50
  12  18   1   24.50    6.50
  10 -19  -1    0.60    6.20
 -10 -19   1   -1.70    5.40
 -10  19   1  -11.50    5.50
  10  19  -1   -1.70    4.80
  -9 -19   1    5.40    5.30
   9 -19  -1    4.20    6.00
   9  19  -1    4.20    5.20
  -9  19   1    2.10    5.40
   8 -19  -1  226.38   17.30
  -8 -19   1  218.78   16.10
  -8  19   1  246.58   16.20
   8  19  -1  222.68   15.60
   7 -19  -1   15.20    6.10
  -7 -19   1    8.60    5.20
  -7  19   1   15.40    5.50
   7  19  -1   18.00    5.30
   6 -19  -1   29.30    6.50
  -6 -19   1   25.70    5.90
  -6  19   1   22.70    5.90
   6  19  -1   21.50    5.40
   5 -19  -1   18.90    5.90
  -5 -19   1   19.50    5.30
   5  19  -1   17.60    4.90
  -5  19   1   10.70    5.20
  -4 -19   1  272.77   18.00
   4 -19  -1  296.67   19.00
  -4  19   1  272.37   17.80
   4  19  -1  263.27   17.20
   3 -19  -1   89.99   11.20
  -3 -19   1   93.59   10.40
  -3  19   1  107.09   10.20
   3  19  -1   92.89    9.50
   2 -19  -1   29.90    6.10
  -2 -19   1   17.00    5.50
  -2  19   1   15.20    5.20
   2  19  -1   22.60    5.10
  -1 -19   1   52.29    7.10
   1 -19  -1   55.09    7.50
   1  19  -1   51.39    6.50
  -1  19   1   54.49    6.90
   0 -19  -1   17.70    5.70
   0 -19   1   11.00    5.30
   0  19   1    5.90    4.90
   0  19  -1   11.20    4.70
  -1 -19  -1   23.60    6.00
   1 -19   1   20.70    5.90
  -1  19  -1   21.90    5.00
   1  19   1   19.70    5.00
  -2 -19  -1  249.97   16.60
   2 -19   1  234.18   16.40
  -2  19  -1  223.88   15.50
   2  19   1  238.78   16.00
  -3 -19  -1   45.10    6.80
   3 -19   1   39.80    6.80
  -3  19  -1   35.90    6.00
   3  19   1   39.60    6.30
   4 -19   1  579.94   32.90
  -4 -19  -1  583.34   32.90
   4  19   1  607.64   32.40
  -4  19  -1  577.04   32.10
   5 -19   1    1.30    5.20
  -5 -19  -1    7.40    5.40
  -5  19  -1    5.40    4.90
   5  19   1    4.00    4.70
  -6 -19  -1  756.12   41.80
   6 -19   1  770.02   41.80
   6  19   1  770.82   41.30
  -6  19  -1  782.12   41.20
  -7 -19  -1    1.70    5.20
   7 -19   1    1.70    5.60
  -7  19  -1   10.00    4.90
   7  19   1    4.30    5.00
  -8 -19  -1  326.17   21.20
   8 -19   1  345.47   21.40
  -8  19  -1  333.57   20.70
   8  19   1  326.27   20.50
   9 -19   1   14.00    6.20
  -9 -19  -1   17.50    5.90
  -9  19  -1    7.70    5.60
   9  19   1   15.00    5.70
 -10 -19  -1  104.49   11.90
  10 -19   1   98.09   12.30
 -10  19  -1  124.79   12.20
  10  19   1  121.89   12.20
   8 -20  -1   10.80    6.80
  -8 -20   1   25.50    6.40
  -8  20   1   41.20    7.00
   8  20  -1   31.00    6.40
  -7 -20   1   37.80    7.00
   7 -20  -1   34.50    7.80
   7  20  -1   31.90    6.60
  -7  20   1   46.20    6.90
  -6 -20   1  239.58   17.20
   6 -20  -1  251.97   17.80
   6  20  -1  244.78   16.50
  -6  20   1  232.28   16.90
  -5 -20   1   16.50    5.60
   5 -20  -1   14.50    6.00
  -5  20   1    2.20    5.60
   5  20  -1    5.60    5.20
   4 -20  -1  381.36   23.40
  -4 -20   1  377.76   23.00
  -4  20   1  362.96   22.50
   4  20  -1  375.16   22.20
   3 -20  -1   25.40    6.60
  -3 -20   1   20.70    6.00
  -3  20   1   19.30    5.90
   3  20  -1   26.10    5.60
   2 -20  -1   92.29   11.10
  -2 -20   1   88.59   11.00
  -2  20   1   91.89   10.40
   2  20  -1   96.79    9.80
   1 -20  -1   62.29    8.20
  -1 -20   1   61.29    7.90
   1  20  -1   58.09    7.20
  -1  20   1   60.49    7.40
   0 -20  -1   73.59    8.70
   0 -20   1   77.79   10.60
   0  20  -1   69.89    9.00
   0  20   1   64.39    7.90
   1 -20   1    9.00    5.60
  -1 -20  -1    8.70    5.70
   1  20   1   18.40    5.40
  -1  20  -1    7.50    5.20
   2 -20   1  204.58   15.30
  -2 -20  -1  215.28   15.60
   2  20   1  198.58   14.60
  -2  20  -1  187.18   14.40
   3 -20   1    8.60    5.70
  -3 -20  -1   11.80    6.10
   3  20   1    8.90    5.40
  -3  20  -1    0.30    4.90
  -4 -20  -1   21.50    6.40
   4 -20   1    8.00    5.70
  -4  20  -1   13.10    5.30
   4  20   1   16.40    5.60
  -5 -20  -1  127.39   12.60
   5 -20   1  118.09   12.60
   5  20   1  140.79   11.80
  -5  20  -1  106.49   11.80
  -6 -20  -1    7.00    5.80
   6 -20   1    0.50    5.60
   6  20   1    5.50    5.10
  -6  20  -1    2.30    5.20
  -7 -20  -1   10.50    5.70
   7 -20   1   -4.40    5.90
   7  20   1   -2.40    5.40
  -7  20  -1    9.30    5.20
  -8 -20  -1   22.10    6.50
   8 -20   1   15.70    6.30
   8  20   1   16.50    6.00
  -8  20  -1    4.40    5.70
   5 -21  -1   92.79   11.60
  -5 -21   1   52.19    8.10
  -5  21   1   57.89    7.90
   5  21  -1   48.20    7.30
  -4 -21   1    5.00    5.90
   4 -21  -1   22.10    6.50
   4  21  -1    8.10    5.50
  -4  21   1   13.60    6.00
  -3 -21   1   -7.60    5.50
   3 -21  -1    1.00    6.20
  -3  21   1   10.40    5.70
   3  21  -1    0.60    5.20
  -2 -21   1   32.10    6.80
   2 -21  -1   44.30    7.40
   2  21  -1   34.20    6.50
  -2  21   1   31.40    6.50
   1 -21  -1   26.30    6.60
  -1 -21   1   17.30    6.20
   1  21  -1   19.10    5.70
  -1  21   1   21.40    5.90
   0 -21   1    8.70    6.00
   0 -21  -1    9.00    6.20
   0  21  -1   15.50    5.40
   0  21   1   14.90    5.70
  -1 -21  -1   54.59    7.80
   1 -21   1   37.60    7.20
  -1  21  -1   42.50    6.90
   1  21   1   35.80    6.70
  -2 -21  -1   67.69    8.80
   2 -21   1   84.89   11.50
  -2  21  -1   86.09   10.40
   2  21   1   73.79    8.60
   3 -21   1   -1.70    6.10
  -3 -21  -1   -1.70    5.90
  -3  21  -1    2.80    5.30
   3  21   1    5.40    5.40
  -4 -21  -1  166.48   14.90
   4 -21   1  174.88   15.00
   4  21   1  165.38   14.30
  -4  21  -1  188.78   14.40
   5 -21   1   -5.70    6.00
  -5 -21  -1   -7.10    5.80
  -5  21  -1   -2.20    5.50
   5  21   1    7.70    6.00
 -22   0   2  122.99   13.30
  22   0  -2  148.79   14.60
  21   0  -2    4.20    6.10
 -21   0   2    6.40    5.60
 -20   0   2   93.69   10.90
  20   0  -2  114.29   11.50
  19   0  -2    4.10    5.20
 -19   0   2   -2.00    4.60
  18   0  -2   95.19   10.50
 -18   0   2  103.59   10.30
  17   0  -2    2.90    4.50
 -17   0   2    1.30    4.30
 -16   0   2  131.49   10.50
  16   0  -2  119.69   10.70
 -15   0   2   -0.90    3.50
  15   0  -2   -0.10    4.00
 -14   0   2  637.64   34.00
  14   0  -2  654.23   34.10
  13   0  -2    0.00    3.20
 -13   0   2   -1.10    2.90
 -12   0   2   64.29    6.10
  12   0  -2   58.69    6.40
  11   0  -2   -1.40    2.50
 -11   0   2   -4.20    2.30
 -10   0   2  149.99    9.20
  10   0  -2  136.99    9.20
   9   0  -2   -1.60    2.30
  -9   0   2   -1.60    2.20
   8   0  -2  744.83   37.70
  -8   0   2  747.23   37.60
  -7   0   2   -0.10    1.50
   7   0  -2    2.90    1.70
  -6   0   2 2041.00  100.99
   6   0  -2 2057.19  100.99
  -5   0   2    0.40    1.20
   5   0  -2   -0.70    1.20
  -4   0   2   35.00    2.90
   4   0  -2   35.80    3.00
   3   0  -2    0.50    0.90
   3   0  -2    1.30    1.30
  -3   0   2    0.30    1.30
   2   0  -2 1865.71   98.69
  -2   0   2 2149.19   98.99
   1   0   2   -4.30    0.70
   2   0   2   28.60    2.80
  -2   0  -2   25.60    2.40
   3   0   2    0.30    1.70
  -3   0  -2   -3.50    1.50
  -3   0  -2    0.60    1.80
   3   0   2   -1.00    1.50
  -4   0  -2 1370.16   70.39
  -4   0  -2 1417.76   70.29
   4   0   2 1449.65   70.49
   4   0   2 1406.16   70.29
   5   0   2   -1.10    1.90
   5   0   2   -1.90    1.80
  -5   0  -2   -1.40    1.90
  -5   0  -2    0.60    2.00
   6   0   2  363.46   18.90
   7   0   2   -1.40    1.90
  -7   0  -2    0.40    2.00
  -8   0  -2 1553.64   77.99
   8   0   2 1607.24   78.19
   8   0   2 1527.35   77.99
  -8   0  -2 1587.54   77.89
  -9   0  -2   -1.10    2.60
  -9   0  -2   -1.50    2.50
   9   0   2    4.60    2.70
   9   0   2   -0.70    2.80
 -10   0  -2 2241.48  110.59
  10   0   2 2175.98  110.49
  10   0   2 2308.67  110.59
 -10   0  -2 2188.88  110.29
  11   0   2    0.30    2.70
  11   0   2   -3.70    2.80
 -11   0  -2    2.70    2.70
 -11   0  -2   -3.00    2.60
  12   0   2  238.58   13.90
 -12   0  -2  240.48   13.70
  12   0   2  220.28   13.90
 -12   0  -2  237.38   14.00
 -13   0  -2   -4.10    2.90
  13   0   2   -1.30    3.10
 -13   0  -2   -2.10    2.90
  13   0   2    0.00    3.10
  14   0   2  317.87   19.30
  14   0   2  344.37   19.20
 -14   0  -2  336.37   19.40
 -14   0  -2  345.07   19.00
 -15   0  -2    1.50    3.70
  15   0   2    3.50    3.90
  15   0   2    0.50    4.00
 -15   0  -2    2.50    4.00
  16   0   2  845.12   45.40
 -16   0  -2  896.21   44.90
  16   0   2  863.11   45.00
 -16   0  -2  856.11   45.50
 -17   0  -2    6.00    4.90
 -17   0  -2   -2.90    4.60
  17   0   2    8.60    4.80
  17   0   2    5.00    5.30
 -18   0  -2    2.80    6.40
 -18   0  -2    6.90    5.10
  18   0   2   -0.10    5.30
 -19   0  -2   -5.40    5.10
  19   0   2   -2.90    5.90
 -20   0  -2   14.70    6.20
  20   0   2   19.80    6.70
  21   0   2    1.90    6.60
 -21   0  -2   -4.30    6.30
  22   0   2   -0.50    6.90
 -22   0  -2    9.30    6.90
 -22  -1   2    8.00    6.40
  22  -1  -2    3.40    6.90
  22   1  -2   11.00    6.90
 -22   1   2   18.60    6.30
  21  -1  -2  257.57   18.00
 -21  -1   2  226.98   17.40
 -21   1   2  257.27   17.30
  21   1  -2  246.88   18.10
 -20  -1   2   24.40    6.30
  20  -1  -2   37.20    7.00
  20   1  -2   30.80    6.90
 -20   1   2   39.60    6.60
  19  -1  -2   83.39   10.20
 -19  -1   2   63.09    7.70
 -19   1   2   64.99    7.90
  19   1  -2   72.99    8.30
  18  -1  -2  132.39   11.30
 -18  -1   2  117.99   10.70
 -18   1   2  117.09   11.00
  18   1  -2  110.99   11.30
  17  -1  -2  261.57   17.00
 -17  -1   2  256.27   16.70
 -17   1   2  277.37   17.10
  17   1  -2  267.07   17.20
  16  -1  -2   16.40    6.10
 -16  -1   2   14.90    4.40
  16   1  -2    8.60    4.50
 -15  -1   2    8.10    4.60
  15  -1  -2    4.90    4.10
 -15   1   2   14.30    4.10
  15   1  -2    1.30    6.30
 -14  -1   2   48.10    6.50
  14  -1  -2   40.90    5.50
 -14   1   2   51.89    6.80
  14   1  -2   38.00    5.20
  13  -1  -2    6.90    3.30
 -13  -1   2    4.20    3.00
 -13   1   2    2.20    3.00
  13   1  -2    4.50    3.40
 -12  -1   2  150.68    9.90
  12  -1  -2  162.78   10.30
 -12   1   2  152.08   10.10
  12   1  -2  153.58   10.10
 -11  -1   2  125.09    8.10
  11  -1  -2  109.19    8.10
 -11   1   2  113.59    8.10
  11   1  -2  110.69    8.30
  10  -1  -2    4.70    2.60
 -10  -1   2    4.90    2.40
 -10   1   2    2.00    2.40
  10   1  -2    0.70    2.40
   9  -1  -2   14.70    2.90
  -9  -1   2   15.50    2.90
  -9   1   2   12.90    2.80
   9   1  -2   13.90    2.80
  -8  -1   2  126.29    7.90
   8  -1  -2  138.29    8.10
   8   1  -2  124.89    7.90
  -8   1   2  128.59    8.00
  -7  -1   2   36.50    3.60
   7  -1  -2   36.80    3.70
   7   1  -2   37.20    3.60
  -7   1   2   37.20    3.60
  -6  -1   2  349.47   17.50
   6  -1  -2  330.97   17.60
   6   1  -2  346.97   17.50
  -6   1   2  335.17   17.50
  -5  -1   2  152.08    8.30
   5  -1  -2  151.98    8.50
  -5   1   2  153.08    8.40
   5   1  -2  158.18    8.30
  -4  -1   2    2.70    1.00
  -4   1   2    1.30    1.30
   4   1  -2    0.80    1.10
  -3  -1   2  915.51   45.20
  -2  -1   2 1026.80   49.40
   2  -1  -2  976.00   49.70
  -2  -1   2  998.00   49.40
  -2   1   2 1004.40   49.70
   2   1  -2 1008.70   49.40
  -1   1   2   12.00    1.60
   1  -1   2   77.49    4.50
   1   1   2   74.79    4.70
  -2  -1  -2  327.97   17.50
   2  -1   2  334.77   17.40
  -2   1  -2  329.67   17.30
   2   1   2  335.67   17.60
  -3  -1  -2   86.89    6.00
  -3  -1  -2   89.59    6.20
   3  -1   2   93.09    5.90
   3  -1   2   91.39    6.10
  -3   1  -2   88.39    6.00
   3   1   2   88.19    6.00
  -3   1  -2   95.09    5.90
   3   1   2   92.69    6.20
  -4  -1  -2 1480.55   72.69
   4  -1   2 1477.45   72.69
  -4  -1  -2 1455.35   72.59
   4  -1   2 1435.16   72.49
   4   1   2 1423.56   72.49
   4   1   2 1434.76   72.69
  -4   1  -2 1469.45   72.49
  -4   1  -2 1476.55   72.59
   5  -1   2 3775.62  177.28
  -5  -1  -2 3598.64  176.48
   5   1   2 3487.95  176.48
  -5   1  -2 3509.55  176.78
   6  -1   2  372.66   19.30
  -6  -1  -2  369.56   19.20
   6  -1   2  363.86   19.20
  -6   1  -2  373.76   19.10
   6   1   2  372.36   19.10
  -6   1  -2  366.26   19.80
   7  -1   2 1460.05   71.89
   7  -1   2 1468.35   71.99
  -7  -1  -2 1407.46   71.89
  -7   1  -2 1428.66   71.89
   7   1   2 1441.76   71.89
  -7   1  -2 1479.25   71.79
   8  -1   2   56.99    5.30
  -8  -1  -2   51.19    5.00
   8  -1   2   43.40    5.30
  -8   1  -2   51.79    4.80
  -8   1  -2   44.50    5.10
   8   1   2   38.10    5.10
  -9  -1  -2   57.09    6.00
   9  -1   2   64.39    6.10
   9  -1   2   62.09    6.10
   9   1   2   68.19    6.10
  -9   1  -2   62.99    5.80
  -9   1  -2   68.99    6.00
  10  -1   2   10.50    3.20
  10  -1   2    7.80    2.90
 -10  -1  -2   10.40    3.10
 -10   1  -2    7.60    3.00
  10   1   2    9.70    3.10
 -10   1  -2   11.80    3.00
 -11  -1  -2   15.90    3.50
 -11  -1  -2   19.00    3.90
  11  -1   2   20.10    3.80
  11  -1   2   19.60    3.60
  11   1   2   22.60    5.00
  11   1   2   18.60    3.60
 -11   1  -2   19.00    3.50
 -11   1  -2   20.20    3.40
 -12  -1  -2  106.99    8.30
 -12  -1  -2  107.59    8.50
  12  -1   2  109.69    8.30
  12  -1   2  100.79    8.10
 -12   1  -2  107.59    8.10
  12   1   2  107.59    8.90
  12   1   2  104.39    8.30
 -12   1  -2  100.59    8.00
  13  -1   2   34.30    4.80
 -13  -1  -2   49.30    5.30
  13  -1   2   40.80    4.90
 -13  -1  -2   40.40    5.10
 -13   1  -2   31.60    4.60
  13   1   2   40.50    5.20
  13   1   2   31.60    4.80
 -13   1  -2   38.30    4.60
  14  -1   2   -4.30    3.40
 -14  -1  -2   -7.70    3.60
 -14  -1  -2    0.50    3.40
  14  -1   2   -7.00    3.50
  14   1   2   -2.30    3.60
 -14   1  -2    1.90    3.60
  14   1   2    1.90    4.00
 -14   1  -2    2.40    3.20
  15  -1   2   58.09    7.40
  15  -1   2   38.70    5.80
 -15  -1  -2   65.49    8.00
 -15  -1  -2   50.89    6.20
 -15   1  -2   49.99    6.10
  15   1   2   50.39    6.40
 -15   1  -2   39.60    5.20
  15   1   2   47.80    6.00
 -16  -1  -2   32.30    5.50
  16  -1   2   31.10    5.80
  16  -1   2   30.60    5.20
 -16  -1  -2   23.10    5.40
 -16   1  -2   20.10    5.10
  16   1   2   26.00    5.70
  16   1   2   23.50    5.20
 -16   1  -2   23.90    4.80
  17  -1   2   86.79    9.70
  17  -1   2  128.29   11.40
 -17  -1  -2  110.69   11.30
 -17  -1  -2   95.69   12.80
  17   1   2  104.59   13.90
  17   1   2  116.19   10.70
 -17   1  -2  117.49   10.40
 -17   1  -2  109.19   10.80
 -18  -1  -2  157.78   13.20
 -18   1  -2  152.68   12.30
  18   1   2  144.49   13.20
 -19  -1  -2   -1.20    5.40
  19  -1   2    1.20    5.60
 -19   1  -2    0.60    5.10
  19   1   2   -1.50    5.70
 -20  -1  -2  121.79   13.60
  20  -1   2  144.89   14.20
 -20   1  -2  143.99   12.90
  20   1   2  145.69   14.10
  21  -1   2   43.40    8.10
 -21  -1  -2   62.29    8.40
 -21   1  -2   57.79    8.30
  21   1   2   62.19    8.60
  22  -1   2   18.00    7.70
 -22  -1  -2   14.70    6.80
  22   1   2   47.90    8.50
 -22   1  -2   26.70    7.30
  22  -2  -2   -3.80    6.50
 -22  -2   2   10.00    6.10
  22   2  -2   -0.10    6.40
 -22   2   2   -2.00    5.90
  21  -2  -2   36.30    7.50
 -21  -2   2   17.00    6.40
  21   2  -2   23.30    6.90
 -21   2   2   31.60    6.40
  20  -2  -2    2.50    5.70
 -20  -2   2   -3.90    5.00
 -20   2   2    1.00    5.30
  20   2  -2   -2.80    5.50
 -19  -2   2  146.59   12.70
  19  -2  -2  165.78   13.30
 -19   2   2  154.18   13.10
  19   2  -2  151.58   13.20
  18  -2  -2   35.50    6.60
 -18  -2   2   48.00    6.70
 -18   2   2   48.80    6.60
  18   2  -2   48.40    6.90
 -17  -2   2   93.79    9.50
  17  -2  -2  103.99   10.30
 -17   2   2  101.99    9.90
  17   2  -2   91.39    9.80
 -16  -2   2   11.30    4.40
  16  -2  -2   11.60    7.30
  16   2  -2   14.20    4.60
 -16   2   2    9.50    5.20
  15  -2  -2   -4.70    4.00
 -15  -2   2   -0.80    4.50
  15   2  -2   -0.50    4.10
 -15   2   2    1.90    3.80
 -14  -2   2   56.19    7.00
  14  -2  -2   43.10    5.60
 -14   2   2   46.60    5.60
  14   2  -2   55.09    7.20
 -13  -2   2   11.40    3.50
  13  -2  -2   16.00    3.80
 -13   2   2   14.10    3.50
  13   2  -2   13.00    3.60
 -12  -2   2  519.85   27.30
  12  -2  -2  491.85   28.40
  12   2  -2  526.35   27.40
 -12   2   2  534.45   27.40
  11  -2  -2  272.07   15.60
 -11  -2   2  276.87   15.50
  11   2  -2  283.17   15.60
 -11   2   2  277.07   15.50
 -10  -2   2  397.26   21.20
  10  -2  -2  410.86   21.50
  10   2  -2  393.66   21.30
 -10   2   2  403.26   21.30
  -9  -2   2 1156.28   58.19
   9  -2  -2 1186.48   58.39
  -9   2   2 1145.79   58.29
   9   2  -2 1169.98   58.19
  -8  -2   2   77.09    5.80
   8  -2  -2   79.39    6.00
   8   2  -2   72.89    5.80
  -8   2   2   81.49    6.00
   7  -2  -2  115.29    7.40
  -7  -2   2  119.39    7.10
   7   2  -2  130.09    7.30
  -7   2   2  119.69    7.30
  -6  -2   2  470.35   23.90
   6  -2  -2  477.25   24.10
  -6   2   2  462.35   24.00
   6   2  -2  481.15   23.90
   5  -2  -2 2020.70   99.79
  -5  -2   2 2021.10   99.49
  -5   2   2 1998.60   99.69
   5   2  -2 2054.99   99.49
  -4  -2   2  100.79    5.50
   4   2  -2  101.89    5.60
  -3  -2   2 1590.34   78.79
   3   2  -2 1620.04   78.79
   2  -2  -2  415.96   22.20
  -2  -2   2  421.26   21.00
  -2  -2   2  436.56   21.00
   2  -2  -2  416.96   21.50
   2   2  -2  436.06   21.00
  -2   2   2  424.56   21.60
   2   2  -2  411.06   20.90
  -2   2   2  402.46   21.50
   1  -2  -2    1.10    1.30
  -1  -2   2    1.20    0.60
  -1   2   2    0.00    1.30
   0  -2   2  933.41   44.80
   0  -2  -2  918.71   45.20
   0  -2   2  897.41   44.80
   0   2  -2  884.51   44.90
   0   2   2  913.51   45.30
   1  -2   2  172.88    9.00
   1  -2   2  153.68    9.90
  -1   2  -2  173.38    9.00
   1   2   2  172.88    9.40
  -2  -2  -2  226.38   12.60
  -2  -2  -2  241.28   12.90
   2  -2   2  234.48   12.50
   2  -2   2  239.38   12.50
   2   2   2  235.38   12.90
   2   2   2  234.18   12.80
  -2   2  -2  238.88   12.40
   3  -2   2    0.30    1.80
  -3   2  -2    0.90    1.50
   4  -2   2 1256.37   62.29
  -4  -2  -2 1243.28   62.49
  -4   2  -2 1262.37   62.19
   4   2   2 1268.97   62.39
  -5  -2  -2 1829.72   88.39
   5  -2   2 1821.12   88.39
   5   2   2 1775.62   88.29
  -5   2  -2 1732.53   88.19
  -6  -2  -2  197.68   10.80
   6  -2   2  188.58   10.70
  -6   2  -2  192.48   10.50
   6   2   2  189.78   10.70
  -7  -2  -2   79.89    5.90
   7  -2   2   82.49    6.00
   7  -2   2   84.99    6.00
   7   2   2   80.29    5.80
  -7   2  -2   77.09    6.00
  -7   2  -2   77.99    5.70
   8  -2   2  701.93   35.00
  -8  -2  -2  666.43   34.90
   8  -2   2  684.73   34.80
  -8   2  -2  692.33   34.70
  -8   2  -2  692.83   34.90
   8   2   2  665.23   34.80
   9  -2   2  163.88   10.50
   9  -2   2  177.28   10.70
  -9  -2  -2  174.98   10.70
  -9   2  -2  166.28   10.50
  -9   2  -2  173.58   10.40
   9   2   2  173.08   10.60
  10  -2   2 1645.84   78.49
  10  -2   2 1535.25   78.39
 -10  -2  -2 1611.14   78.59
 -10   2  -2 1533.05   78.39
  10   2   2 1553.74   78.39
 -10   2  -2 1545.45   78.19
  11  -2   2  822.22   42.00
 -11  -2  -2  822.92   42.20
  11  -2   2  818.82   42.10
 -11   2  -2  824.02   42.00
  11   2   2  822.02   42.10
 -11   2  -2  820.72   41.80
  12  -2   2  661.33   34.60
 -12  -2  -2  678.93   34.80
  12  -2   2  647.84   34.60
  12   2   2  665.93   34.70
 -12   2  -2  676.73   34.30
 -12   2  -2  659.53   34.60
 -13  -2  -2   61.19    7.50
  13  -2   2   78.79    7.40
  13  -2   2   85.29    7.50
 -13   2  -2   77.39    7.00
 -13   2  -2   73.79    7.10
  13   2   2   72.09    7.60
  14  -2   2  305.27   17.60
 -14  -2  -2  295.97   18.00
  14  -2   2  303.57   17.80
 -14   2  -2  315.77   17.50
  14   2   2  296.97   17.90
 -14   2  -2  308.77   17.80
  15  -2   2   47.10    6.10
 -15  -2  -2   51.39    6.60
  15  -2   2   54.09    7.30
 -15   2  -2   54.99    7.40
 -15   2  -2   63.69    6.20
  15   2   2   50.19    6.40
  16  -2   2  480.35   27.40
 -16  -2  -2  520.45   28.20
  16  -2   2  484.05   27.90
  16   2   2  494.65   28.00
 -16   2  -2  499.15   27.80
 -16   2  -2  522.95   27.30
  17  -2   2   37.10    5.60
 -17  -2  -2   34.20    6.70
  17  -2   2   23.30    6.20
 -17   2  -2   28.60    5.80
  17   2   2   36.20    6.60
 -17   2  -2   31.10    5.40
  18  -2   2    0.30    5.60
  18  -2   2    2.50    4.50
 -18  -2  -2    6.10    5.30
 -18   2  -2    9.70    5.00
 -18   2  -2   10.80    5.40
  18   2   2   14.50    5.80
  19  -2   2   10.70    6.30
 -19  -2  -2   20.50    6.00
 -19   2  -2   13.70    5.70
  19   2   2    4.60    5.70
  20  -2   2   10.40    6.70
 -20  -2  -2   17.40    6.20
  20   2   2    3.80    6.10
 -20   2  -2    9.20    5.90
 -21  -2  -2    1.90    6.10
  21  -2   2    6.60    7.00
  21   2   2   11.10    6.80
 -21   2  -2    9.20    6.40
  22  -2   2    7.70    7.50
 -22  -2  -2    6.20    6.40
 -22   2  -2   18.90    6.70
  22   2   2   17.60    7.50
 -22  -3   2   20.60    6.60
  22  -3  -2   32.30    8.00
  22   3  -2    8.30    6.90
 -22   3   2   25.90    6.90
 -21  -3   2  254.67   18.30
  21  -3  -2  266.37   19.10
  21   3  -2  267.37   19.10
 -21   3   2  295.57   18.80
  20  -3  -2   -5.40    5.60
 -20  -3   2    2.90    5.10
 -20   3   2  -13.30    5.00
  20   3  -2   18.40    6.00
  19  -3  -2  105.99   12.10
 -19  -3   2  117.89   11.70
 -19   3   2  122.19   11.40
  19   3  -2  121.69   11.80
  18  -3  -2   25.80    6.00
 -18  -3   2   20.30    5.30
  18   3  -2   25.70    5.60
 -18   3   2   18.10    5.50
 -17  -3   2   -8.90    4.00
  17  -3  -2   -3.50    4.70
  17   3  -2   -4.50    4.30
 -17   3   2    0.50    4.40
  16  -3  -2  241.18   16.80
 -16  -3   2  266.17   16.30
  16   3  -2  260.37   16.30
 -16   3   2  256.07   16.40
  15  -3  -2    5.50    4.30
 -15  -3   2    8.60    4.00
 -15   3   2   -1.70    3.70
  15   3  -2    2.90    3.90
  14  -3  -2 1587.74   80.39
 -14  -3   2 1605.84   80.59
  14   3  -2 1544.15   81.29
 -14   3   2 1645.74   80.39
 -13  -3   2    2.40    3.10
  13  -3  -2    0.10    3.20
 -13   3   2    6.50    3.20
  13   3  -2    3.10    3.20
  12  -3  -2  580.14   30.90
 -12  -3   2  591.24   30.80
 -12   3   2  579.64   30.80
  12   3  -2  603.94   30.80
 -11  -3   2   69.39    6.20
  11  -3  -2   68.89    6.50
 -11   3   2   63.79    6.20
  11   3  -2   69.99    6.20
 -10  -3   2   10.70    2.70
  10  -3  -2    8.70    2.90
 -10   3   2    5.90    2.70
  10   3  -2   11.40    2.70
  -9  -3   2  119.09    7.70
   9  -3  -2  117.89    7.90
  -9   3   2  105.99    7.70
   9   3  -2  111.39    7.60
  -8  -3   2  448.86   23.50
   8  -3  -2  460.95   23.80
   8   3  -2  471.35   23.50
  -8   3   2  438.76   23.60
   7  -3  -2    0.90    2.30
  -7  -3   2    3.30    1.80
  -7   3   2    2.20    2.00
   7   3  -2    2.40    1.80
   6  -3  -2  330.17   17.10
  -6  -3   2  323.57   16.70
   6   3  -2  323.77   16.80
  -6   3   2  328.37   17.10
   5  -3  -2 1101.39   54.09
  -5  -3   2 1059.59   53.69
  -5   3   2 1097.19   53.99
   5   3  -2 1093.99   53.79
   4  -3  -2  177.58    9.60
  -4  -3   2  173.28    9.00
  -4   3   2  172.38    9.50
   4   3  -2  175.58    9.10
  -3  -3   2 1804.92   90.29
   3   3  -2 1871.31   90.29
  -2  -3   2 1725.53   84.69
   2   3  -2 1732.63   84.69
  -1  -3   2 1704.63   82.69
   1  -3  -2 1647.34   83.29
   1  -3  -2 1747.03   83.39
  -1  -3   2 1608.24   82.69
  -1   3   2 1720.43   83.39
  -1   3   2 1729.93   83.29
   1   3  -2 1630.94   82.69
   1   3  -2 1679.13   82.69
   0  -3  -2   38.20    3.80
   0  -3   2   38.50    2.80
   0  -3   2   37.10    2.90
   0  -3  -2   38.90    3.70
   0   3   2   38.40    3.70
   0   3  -2   39.40    2.90
   0   3  -2   36.10    2.90
   0   3   2   39.10    3.70
   1  -3   2   -0.40    1.10
  -1   3  -2    0.20    1.00
   2  -3   2  132.99    7.20
  -2   3  -2  127.79    6.90
   3  -3   2  718.63   36.10
  -3  -3  -2  721.43   36.30
   3   3   2  718.83   36.20
  -3   3  -2  738.33   36.00
  -4  -3  -2   61.99    4.60
   4  -3   2   59.99    4.40
   4   3   2   66.09    4.50
  -4   3  -2   63.69    4.20
   5  -3   2  570.24   28.70
  -5  -3  -2  551.14   28.70
   5   3   2  578.94   28.70
  -5   3  -2  564.64   28.50
  -6  -3  -2  157.38    9.30
   6  -3   2  161.38    9.30
  -6   3  -2  156.38    9.00
   6   3   2  164.58    9.20
   7  -3   2   29.80    3.50
   7  -3   2   28.90    3.40
  -7  -3  -2   25.20    3.30
  -7   3  -2   28.50    3.50
   7   3   2   34.00    4.20
  -7   3  -2   31.80    3.90
   8  -3   2  755.22   37.40
   8  -3   2  732.13   37.50
  -8  -3  -2  731.33   37.50
  -8   3  -2  715.23   37.40
   8   3   2  714.63   37.40
  -8   3  -2  765.02   37.30
   9  -3   2  155.98   10.30
  -9  -3  -2  161.88   10.40
   9  -3   2  162.48   10.40
   9   3   2  173.28   10.40
  -9   3  -2  171.78   10.40
  -9   3  -2  172.58   10.10
  10  -3   2  449.06   23.60
 -10  -3  -2  441.36   23.70
  10  -3   2  453.65   23.70
  10   3   2  446.76   23.60
 -10   3  -2  435.26   23.50
 -10   3  -2  440.76   23.40
  11  -3   2    5.20    2.90
 -11  -3  -2    7.00    3.10
  11  -3   2    4.50    3.00
  11   3   2    8.30    3.00
 -11   3  -2    5.00    2.80
 -11   3  -2    5.90    2.80
  12  -3   2  392.46   21.80
 -12  -3  -2  405.86   22.00
  12  -3   2  396.06   21.70
  12   3   2  379.06   21.80
 -12   3  -2  422.66   21.50
 -12   3  -2  396.56   21.70
 -13  -3  -2  104.19    8.90
  13  -3   2  109.59    8.60
  13  -3   2  112.99    8.80
 -13   3  -2  104.99    8.30
  13   3   2   99.29    8.80
 -13   3  -2  110.09    8.50
  14  -3   2   36.50    4.90
  14  -3   2   39.10    5.40
 -14  -3  -2   33.80    5.40
 -14   3  -2   35.50    5.00
  14   3   2   31.30    5.20
 -14   3  -2   41.90    4.90
  15  -3   2    3.80    4.00
  15  -3   2    7.20    3.90
 -15  -3  -2    3.60    4.30
 -15   3  -2    7.40    3.90
 -15   3  -2    6.40    4.00
  15   3   2    4.90    4.30
  16  -3   2   59.39    7.70
  16  -3   2   39.10    6.20
 -16   3  -2   37.20    5.60
 -16   3  -2   31.00    5.30
  17  -3   2  185.58   14.30
  17  -3   2  197.08   13.30
 -17  -3  -2  199.98   14.20
 -17   3  -2  184.88   13.70
 -17   3  -2  176.28   13.20
  17   3   2  187.38   14.10
 -18  -3  -2  670.63   35.70
  18  -3   2  652.13   34.70
  18  -3   2  605.34   35.50
 -18   3  -2  643.84   35.40
 -18   3  -2  672.13   34.80
  18   3   2  624.64   35.50
  19  -3   2   19.70    8.10
 -19  -3  -2   10.60    5.90
  19   3   2   10.60    6.20
  20  -3   2  340.27   21.70
 -20  -3  -2  310.17   21.10
  20   3   2  325.57   21.20
 -20   3  -2  318.17   21.00
 -21  -3  -2    6.30    6.30
  21  -3   2   -4.80    6.70
  21   3   2    7.70    6.90
 -21   3  -2   -6.60    5.80
  22  -3   2  246.08   19.10
 -22  -3  -2  207.08   18.20
  22   3   2  239.28   19.10
 -22   3  -2  231.08   17.90
 -22  -4   2   -4.00    5.90
  22  -4  -2    1.00    6.80
  22   4  -2   -2.50    6.30
 -22   4   2   -2.00    6.00
  21  -4  -2   74.79    9.10
 -21  -4   2   60.89    8.60
 -21   4   2   73.79    8.60
  21   4  -2   72.59    9.00
 -20  -4   2   13.20    5.50
  20  -4  -2   19.60    6.60
  20   4  -2   23.20    6.60
 -20   4   2   19.20    5.80
 -19  -4   2  122.09   11.70
  19  -4  -2  121.09   12.80
  19   4  -2  147.39   12.50
 -19   4   2  142.59   12.10
  18  -4  -2   13.90    5.50
 -18  -4   2   15.80    5.10
  18   4  -2   14.40    5.30
 -18   4   2   22.00    5.40
 -17  -4   2  479.25   27.40
  17  -4  -2  498.95   27.90
  17   4  -2  482.85   27.40
 -17   4   2  459.85   27.70
 -17   4   2  525.45   27.50
  16  -4  -2   21.50    5.40
  16  -4  -2   19.50    5.30
 -16  -4   2   32.30    5.40
 -16   4   2   32.20    5.80
  16   4  -2   27.90    5.40
 -16   4   2   23.30    5.10
  15  -4  -2  409.46   22.50
  15  -4  -2  380.16   22.50
 -15  -4   2  381.26   22.30
 -15   4   2  407.26   22.10
  15   4  -2  389.86   22.30
 -15   4   2  389.26   22.40
  14  -4  -2    0.30    4.30
 -14  -4   2    7.10    4.70
  14  -4  -2    5.40    3.80
  14   4  -2   -3.00    3.60
 -14   4   2    8.90    3.60
 -14   4   2   -2.60    4.00
 -13  -4   2  474.65   26.50
  13  -4  -2  526.95   26.80
  13  -4  -2  486.15   26.70
 -13   4   2  498.15   26.40
  13   4  -2  498.05   26.60
 -13   4   2  481.95   26.50
  12  -4  -2   52.39    7.00
 -12  -4   2   63.69    6.30
  12  -4  -2   58.19    6.40
  12   4  -2   54.89    6.20
 -12   4   2   55.09    6.80
 -12   4   2   52.19    6.30
  11  -4  -2   54.49    6.40
  11  -4  -2   49.80    6.10
 -11  -4   2   55.29    5.70
 -11   4   2   53.49    6.30
 -11   4   2   54.09    5.70
  11   4  -2   54.29    5.70
  10  -4  -2  133.89    9.60
  10  -4  -2  136.49    9.10
 -10  -4   2  132.09    8.70
  10   4  -2  145.09    8.80
 -10   4   2  128.69    9.00
 -10   4   2  134.89    8.90
   9  -4  -2 1768.52   87.29
  -9  -4   2 1749.43   86.99
  -9   4   2 1742.23   87.59
   9   4  -2 1769.72   86.99
  -9   4   2 1738.23   87.19
   8  -4  -2   12.20    3.00
  -8  -4   2   15.50    2.60
   8   4  -2   15.40    2.60
  -8   4   2    9.10    2.80
   7  -4  -2   21.80    3.10
  -7  -4   2   31.40    3.50
   7   4  -2   27.60    3.60
  -7   4   2   19.10    2.90
   6  -4  -2  478.05   24.80
  -6  -4   2  490.35   24.50
   6   4  -2  478.45   24.40
  -6   4   2  485.25   24.80
  -5  -4   2  721.83   36.00
   5   4  -2  720.03   36.00
  -5   4   2  727.23   36.30
  -4  -4   2 1441.16   73.09
   4  -4  -2 1509.75   73.59
  -4   4   2 1508.25   73.49
   4   4  -2 1484.05   73.09
  -3  -4   2 1706.63   83.49
   3   4  -2 1692.13   83.49
  -2  -4   2 1488.45   73.39
   2   4  -2 1500.15   73.39
  -1  -4   2  729.33   36.20
   1   4  -2  735.63   36.10
   0  -4   2   11.80    1.50
   0   4  -2   12.50    1.60
  -1  -4  -2 6602.24  324.47
   1  -4   2 6675.23  324.17
  -1   4  -2 6619.84  324.07
   1   4   2 6580.24  324.27
   2  -4   2  739.83   37.00
  -2  -4  -2  741.43   37.20
  -2   4  -2  752.22   36.90
   2   4   2  740.43   37.10
  -3  -4  -2 2033.40   98.99
   3  -4   2 2029.60   98.89
  -3   4  -2 1987.00   98.69
   3   4   2 1977.90   98.89
  -4  -4  -2  326.77   16.80
   4  -4   2  317.77   16.70
   4   4   2  312.27   16.60
  -4   4  -2  323.67   16.40
  -5  -4  -2  251.47   13.60
   5  -4   2  251.67   13.50
  -5   4  -2  248.98   13.30
   5   4   2  255.07   13.50
  -6  -4  -2   38.90    4.30
   6  -4   2   36.40    4.20
  -6   4  -2   43.70    3.90
   6   4   2   37.10    4.20
   7  -4   2  225.28   12.90
  -7  -4  -2  224.58   12.80
   7   4   2  228.88   12.80
  -7   4  -2  227.28   12.50
   8  -4   2  389.96   20.60
   8  -4   2  382.06   20.70
  -8  -4  -2  388.86   20.70
   8   4   2  397.56   20.70
  -8   4  -2  388.96   20.60
  -8   4  -2  377.56   20.30
   9  -4   2  258.57   15.00
  -9  -4  -2  266.87   15.10
   9  -4   2  269.37   15.00
   9   4   2  278.07   15.00
  -9   4  -2  258.57   14.70
  -9   4  -2  263.97   14.80
 -10  -4  -2    4.30    3.00
  10  -4   2   -0.40    2.70
  10  -4   2    3.60    2.70
 -10   4  -2    1.20    2.50
  10   4   2    4.30    2.80
 -10   4  -2    6.70    2.70
 -11  -4  -2    4.30    3.00
  11  -4   2   -3.00    2.70
  11  -4   2    4.50    3.00
 -11   4  -2    1.40    2.60
 -11   4  -2    0.50    2.60
  11   4   2   -1.50    2.90
  12  -4   2  249.68   14.60
  12  -4   2  241.58   14.50
 -12  -4  -2  240.28   14.80
  12   4   2  250.37   14.70
 -12   4  -2  246.78   14.30
 -12   4  -2  244.38   14.40
 -13  -4  -2   11.70    3.80
  13  -4   2   14.80    4.00
  13  -4   2   11.70    3.50
  13   4   2    6.30    3.80
 -13   4  -2    7.00    3.30
 -13   4  -2    7.60    3.30
  14  -4   2   66.79    7.50
 -14  -4  -2   70.39    8.30
  14  -4   2   63.79    7.70
 -14   4  -2   68.59    7.30
 -14   4  -2   66.79    7.40
  14   4   2   63.19    8.20
  15  -4   2    6.00    4.30
 -15  -4  -2    1.90    4.20
  15  -4   2   -2.10    3.50
 -15   4  -2    0.50    3.60
 -15   4  -2    1.60    3.80
  15   4   2    3.40    4.40
  16  -4   2  133.39   10.70
 -16  -4  -2  137.09   11.40
  16  -4   2  131.09   11.10
  16   4   2  118.89   11.20
 -16   4  -2  116.29   10.30
 -16   4  -2  119.79   10.60
  17  -4   2  182.58   13.30
 -17  -4  -2  192.88   14.10
  17  -4   2  175.68   13.90
 -17   4  -2  184.48   13.50
 -17   4  -2  190.28   13.30
  17   4   2  172.88   14.00
  18  -4   2   12.50    6.10
  18  -4   2   13.60    5.10
 -18  -4  -2   12.20    5.60
 -18   4  -2   16.20    5.80
  18   4   2   10.60    5.90
 -18   4  -2   10.60    5.20
 -19  -4  -2   24.80    6.50
  19  -4   2   20.50    8.60
 -19   4  -2   22.50    6.60
  19   4   2   28.40    6.90
 -20  -4  -2    4.70    5.80
  20  -4   2    3.80    6.50
 -20   4  -2    0.30    5.90
  20   4   2    6.90    6.40
 -21  -4  -2  135.39   14.30
  21  -4   2  140.09   14.90
  21   4   2  121.59   14.20
 -21   4  -2  145.19   14.00
  22  -4   2    9.40    7.90
 -22  -4  -2    6.20    7.00
 -22   4  -2    6.80    7.00
  22   4   2    8.80    7.50
 -22  -5   2   -6.30    6.00
  22  -5  -2    3.40    7.10
 -22   5   2  -12.80    6.00
  22   5  -2   -9.20    6.20
  21  -5  -2  163.98   14.60
 -21  -5   2  141.59   13.60
  21   5  -2  138.59   14.00
 -21   5   2  132.89   13.40
  20  -5  -2    2.70    6.10
 -20  -5   2    8.20    5.70
  20   5  -2    7.40    5.70
 -20   5   2   10.60    5.60
 -19  -5   2   72.79    9.70
  19  -5  -2   60.69    8.40
 -19   5   2   75.19   10.00
  19   5  -2   67.79    8.20
 -18  -5   2  113.19   11.60
  18  -5  -2  127.79   12.70
  18   5  -2  156.18   11.90
 -18   5   2  137.89   12.10
  17  -5  -2   10.50    6.50
  17  -5  -2    8.50    7.70
 -17  -5   2    3.30    4.30
 -17   5   2    7.30    5.20
  17   5  -2    1.80    4.70
  16  -5  -2  178.18   12.90
  16  -5  -2  150.88   13.40
 -16  -5   2  188.58   13.00
  16   5  -2  196.88   13.30
 -16   5   2  186.58   13.00
 -16   5   2  176.98   13.30
  15  -5  -2  204.08   14.10
 -15  -5   2  200.88   13.70
  15  -5  -2  219.58   13.90
  15   5  -2  218.28   14.00
 -15   5   2  199.88   13.80
 -15   5   2  199.38   13.60
  14  -5  -2  560.34   30.40
  14  -5  -2  560.54   30.10
 -14  -5   2  563.84   30.10
  14   5  -2  571.34   30.10
 -14   5   2  564.24   29.80
 -14   5   2  550.14   30.10
 -13  -5   2   82.39    8.20
  13  -5  -2   77.89    7.70
  13  -5  -2   78.89    7.90
 -13   5   2   81.29    7.60
  13   5  -2   75.29    8.60
 -13   5   2   71.39    7.50
 -12  -5   2   53.59    6.20
  12  -5  -2   47.00    5.30
  12  -5  -2   57.39    6.60
 -12   5   2   50.89    5.20
  12   5  -2   46.30    6.20
 -12   5   2   49.00    6.10
 -11  -5   2   94.69    7.40
  11  -5  -2   84.09    7.60
  11  -5  -2   99.59    7.70
  11   5  -2   92.49    7.30
 -11   5   2  101.39    7.40
 -11   5   2   90.09    7.40
  10  -5  -2    9.60    2.90
  10  -5  -2   10.60    3.10
 -10  -5   2   11.30    2.90
 -10   5   2    9.60    2.90
 -10   5   2   12.50    3.00
  10   5  -2   13.00    2.90
  -9  -5   2  163.58    9.60
   9  -5  -2  154.98   10.00
   9  -5  -2  171.58   10.20
   9   5  -2  153.98    9.60
  -9   5   2  152.68    9.70
  -9   5   2  151.98    9.70
   8  -5  -2   60.59    6.20
   8  -5  -2   63.19    6.00
  -8  -5   2   64.89    5.40
   8   5  -2   67.69    5.40
  -8   5   2   70.29    5.90
  -8   5   2   67.29    5.70
  -7  -5   2  133.39    8.20
   7  -5  -2  132.39    8.90
   7  -5  -2  133.09    8.60
  -7   5   2  136.89    8.60
  -7   5   2  135.59    8.40
   7   5  -2  133.29    8.10
   6  -5  -2   45.60    5.30
   6  -5  -2   51.49    5.00
  -6  -5   2   53.09    4.30
   6   5  -2   49.20    4.20
  -6   5   2   49.00    4.90
  -6   5   2   52.39    4.80
   5  -5  -2  568.04   28.40
  -5  -5   2  545.35   27.80
   5   5  -2  543.25   27.80
  -5   5   2  562.94   28.10
  -5   5   2  547.55   28.20
  -4  -5   2  193.88   10.10
   4  -5  -2  191.18   10.70
   4  -5  -2  183.78   10.80
   4   5  -2  191.88   10.10
  -4   5   2  191.48   10.50
  -4   5   2  194.78   10.60
  -3  -5   2  179.88    9.70
   3  -5  -2  188.88   10.40
   3   5  -2  184.78    9.60
   2  -5  -2  713.63   35.90
  -2  -5   2  710.53   35.40
  -2   5   2  699.03   35.60
   2   5  -2  728.73   35.30
   1  -5  -2    3.10    1.70
  -1  -5   2    3.50    1.20
   1   5  -2    3.50    1.10
  -1   5   2    3.10    1.50
   0  -5  -2 1225.08   60.79
   0  -5   2 1233.58   60.49
   0   5   2 1213.88   60.69
   0   5  -2 1229.58   60.39
  -1  -5  -2 1004.10   50.29
   1  -5   2 1019.40   49.99
  -1   5  -2 1007.10   49.90
   1   5   2 1009.90   50.09
  -2  -5  -2  186.28   10.40
   2  -5   2  192.88   10.20
   2   5   2  190.58   10.30
  -2   5  -2  191.28   10.00
  -3  -5  -2    9.90    2.10
   3  -5   2   10.70    1.90
  -3   5  -2    9.30    1.60
   3   5   2   10.30    1.90
  -4  -5  -2    1.50    1.90
   4  -5   2    4.20    1.80
   4   5   2    5.30    1.80
  -4   5  -2    1.50    1.50
  -5  -5  -2   19.60    2.80
   5  -5   2   17.40    2.60
   5   5   2   14.40    2.50
  -5   5  -2   14.30    2.20
  -6  -5  -2  445.96   23.10
   6  -5   2  441.66   23.00
   6   5   2  449.06   23.00
  -6   5  -2  427.16   22.70
   7  -5   2   49.00    5.10
  -7  -5  -2   47.50    5.30
  -7   5  -2   42.70    4.70
   7   5   2   43.20    5.00
   8  -5   2  190.78   11.40
  -8  -5  -2  178.08   11.30
   8  -5   2  200.18   11.50
  -8   5  -2  185.48   11.30
  -8   5  -2  187.08   10.90
   8   5   2  186.88   11.20
   9  -5   2  150.88   10.10
  -9  -5  -2  167.18   10.10
   9  -5   2  156.78   10.10
  -9   5  -2  163.28   10.00
  -9   5  -2  159.18    9.70
   9   5   2  150.98   10.00
 -10  -5  -2   94.09    7.70
  10  -5   2   92.59    7.40
  10  -5   2   96.19    7.60
 -10   5  -2  107.89    7.50
 -10   5  -2   94.69    7.20
  10   5   2   98.89    7.70
  11  -5   2  503.15   27.20
 -11  -5  -2  517.95   27.50
  11  -5   2  523.65   27.40
 -11   5  -2  527.65   27.20
  11   5   2  507.05   27.40
 -11   5  -2  510.85   27.00
  12  -5   2  142.99   10.00
  12  -5   2  146.59   10.10
 -12  -5  -2  139.19   10.40
 -12   5  -2  150.88    9.70
 -12   5  -2  132.39    9.70
  12   5   2  140.59   10.20
  13  -5   2   37.90    4.80
 -13  -5  -2   35.50    5.20
  13  -5   2   29.30    4.80
 -13   5  -2   36.10    4.50
 -13   5  -2   32.80    4.40
  13   5   2   32.50    5.10
  14  -5   2  124.99   10.50
  14  -5   2  138.29   10.50
 -14  -5  -2  155.88   11.30
  14   5   2  134.49   11.10
 -14   5  -2  151.48   10.30
 -14   5  -2  130.09   10.20
 -15  -5  -2    8.50    8.10
  15  -5   2    3.30    3.80
  15  -5   2    5.00    4.10
 -15   5  -2    1.80    3.70
 -15   5  -2   -5.50    3.80
  15   5   2   14.60    5.90
  16  -5   2  129.79   11.20
 -16  -5  -2  153.58   12.10
  16  -5   2  138.29   11.70
 -16   5  -2  131.09   11.00
 -16   5  -2  119.09   10.80
  16   5   2  148.79   12.10
  17  -5   2   23.00    5.90
  17  -5   2   20.10    5.30
 -17  -5  -2   31.80    6.00
  17   5   2   25.70    6.00
 -17   5  -2   26.60    5.50
 -17   5  -2   12.40    5.00
  18  -5   2  212.48   16.30
  18  -5   2  225.78   15.20
 -18  -5  -2  250.57   16.30
 -18   5  -2  208.38   15.30
 -18   5  -2  231.08   15.80
  18   5   2  206.68   16.00
 -19  -5  -2   67.79    8.60
  19  -5   2   68.59    8.80
  19   5   2   59.39    8.30
 -19   5  -2   69.59    8.40
 -19   5  -2   70.99    9.20
 -20  -5  -2  146.49   13.50
  20  -5   2  115.09   14.40
 -20   5  -2  126.79   13.00
  20   5   2  133.59   13.70
  21  -5   2   20.50    7.90
 -21  -5  -2   13.60    6.50
 -21   5  -2   30.20    7.30
  21   5   2   26.50    7.60
 -22  -5  -2   62.49    9.00
  22  -5   2   51.09    9.70
 -22   5  -2   52.39    8.30
  22   5   2   49.10    9.10
 -21  -6   2   19.30    6.60
  21  -6  -2   15.60    7.40
 -21   6   2   26.00    6.40
  21   6  -2   30.30    7.10
 -20  -6   2   -6.30    5.10
  20  -6  -2   10.80    6.60
 -20   6   2   -2.20    5.40
  20   6  -2   -0.80    5.30
  19  -6  -2  333.57   21.60
 -19  -6   2  346.17   20.70
  19   6  -2  324.47   20.70
 -19   6   2  318.77   20.70
  18  -6  -2   18.00    6.10
 -18  -6   2   25.10    5.70
 -18   6   2   16.50    5.80
  18   6  -2   14.20    5.10
  17  -6  -2  671.13   35.00
 -17  -6   2  592.14   32.50
  17  -6  -2  490.55   36.40
  17   6  -2  580.34   32.30
 -17   6   2  546.95   33.90
 -17   6   2  647.44   32.20
 -16  -6   2   31.40    5.50
  16  -6  -2   39.10    6.40
  16  -6  -2   33.70    5.30
  16   6  -2   31.00    5.60
 -16   6   2   34.40    5.60
 -16   6   2   27.30    5.70
 -15  -6   2  546.65   29.30
  15  -6  -2  547.65   29.30
  15  -6  -2  537.35   29.60
 -15   6   2  523.05   29.30
  15   6  -2  531.05   29.20
 -15   6   2  533.45   28.70
 -14  -6   2    3.30    3.80
  14  -6  -2    2.10    4.20
  14  -6  -2    3.80    3.80
  14   6  -2    7.30    3.90
 -14   6   2   10.30    4.00
 -14   6   2   13.00    4.00
  13  -6  -2  488.65   26.30
 -13  -6   2  489.05   26.50
  13  -6  -2  490.45   26.50
 -13   6   2  490.25   26.00
 -13   6   2  484.95   26.40
  13   6  -2  473.45   26.20
  12  -6  -2    1.20    3.50
 -12  -6   2    2.20    3.00
  12  -6  -2   -5.10    3.00
 -12   6   2   -1.20    2.90
 -12   6   2   -3.40    2.80
  12   6  -2    2.30    3.10
 -11  -6   2 1260.57   62.19
  11  -6  -2 1182.78   62.19
  11  -6  -2 1223.28   62.29
 -11   6   2 1233.98   61.89
 -11   6   2 1236.58   62.19
  11   6  -2 1261.97   62.09
 -10  -6   2  668.23   34.60
  10  -6  -2  681.43   34.90
  10  -6  -2  681.33   34.80
 -10   6   2  664.93   34.50
 -10   6   2  664.53   34.80
  10   6  -2  678.93   34.60
   9  -6  -2 1071.79   54.69
  -9  -6   2 1075.29   54.49
   9  -6  -2 1093.99   54.79
  -9   6   2 1080.09   54.59
  -9   6   2 1087.49   54.39
   9   6  -2 1097.99   54.39
   8  -6  -2    8.90    3.00
  -8  -6   2   10.70    2.70
   8  -6  -2    9.10    3.10
  -8   6   2   13.80    2.80
  -8   6   2   10.80    2.80
   8   6  -2   14.00    2.70
   7  -6  -2  378.66   20.40
   7  -6  -2  390.46   20.70
  -7  -6   2  379.66   20.10
  -7   6   2  385.46   20.20
   7   6  -2  380.16   20.00
  -7   6   2  387.96   20.40
   6  -6  -2    1.40    2.50
  -6  -6   2   -0.30    2.00
   6  -6  -2    0.30    2.70
   6   6  -2   -0.70    1.90
  -6   6   2    1.60    2.40
  -6   6   2   -0.50    2.40
   5  -6  -2  601.94   30.90
  -5  -6   2  594.84   30.40
  -5   6   2  608.34   30.60
   5   6  -2  602.34   30.30
   4  -6  -2  154.78    9.10
  -4  -6   2  149.19    8.40
   4  -6  -2  150.18    9.20
  -4   6   2  151.98    9.00
  -4   6   2  145.49    8.80
   4   6  -2  145.59    8.30
   3  -6  -2   77.49    5.90
  -3  -6   2   86.19    5.20
  -3   6   2   82.89    5.50
   3   6  -2   78.79    5.00
  -2  -6   2    2.80    1.30
   2  -6  -2    0.40    1.90
  -2   6   2   -0.30    1.60
   2   6  -2    4.40    1.30
  -1  -6   2   93.49    5.80
   1  -6  -2   99.79    6.40
  -1   6   2  100.29    6.00
   1   6  -2  100.89    5.60
   0  -6   2 1354.06   67.29
   0  -6  -2 1369.06   67.59
   0   6   2 1376.96   67.39
   0   6  -2 1348.17   67.19
  -1  -6  -2   10.50    2.10
   1  -6   2   11.30    1.90
  -1   6  -2   11.80    1.60
   1   6   2   10.30    2.00
   2  -6   2  302.57   16.10
  -2  -6  -2  315.87   16.40
   2   6   2  309.67   16.10
  -2   6  -2  307.67   15.90
  -3  -6  -2   80.09    5.70
   3  -6   2   82.19    5.50
   3   6   2   79.69    5.40
  -3   6  -2   77.59    5.10
  -4  -6  -2   -1.30    2.00
   4  -6   2    0.10    2.00
   4   6   2    2.70    2.00
  -4   6  -2    0.10    1.60
   5  -6   2   31.00    3.50
  -5  -6  -2   37.80    4.60
  -5   6  -2   37.60    3.90
   5   6   2   30.20    3.50
   6  -6   2  282.67   15.70
  -6  -6  -2  291.37   15.80
   6   6   2  288.37   15.60
  -6   6  -2  275.57   15.30
  -7  -6  -2  408.56   22.10
   7  -6   2  415.76   22.10
   7   6   2  419.96   22.00
  -7   6  -2  416.56   21.70
   8  -6   2   31.40    4.30
  -8  -6  -2   28.00    3.90
   8  -6   2   23.20    3.60
  -8   6  -2   25.50    4.90
   8   6   2   25.10    3.50
  -8   6  -2   27.30    3.40
   9  -6   2  858.21   43.20
   9  -6   2  834.42   43.40
  -9  -6  -2  843.72   43.40
  -9   6  -2  907.71   43.30
   9   6   2  831.52   43.20
  -9   6  -2  822.72   43.00
  10  -6   2   69.49    6.70
  10  -6   2   72.19    6.50
 -10  -6  -2   61.29    6.60
 -10   6  -2   63.89    5.90
 -10   6  -2   62.59    6.20
  10   6   2   60.19    6.50
 -11  -6  -2   30.60    4.30
  11  -6   2   31.40    4.30
  11  -6   2   18.60    3.90
 -11   6  -2   23.90    3.70
  11   6   2   25.70    4.20
 -11   6  -2   26.00    3.70
 -12  -6  -2   67.29    7.20
  12  -6   2   56.69    6.40
  12  -6   2   71.49    7.00
 -12   6  -2   51.89    6.40
 -12   6  -2   61.09    6.50
  12   6   2   47.10    5.70
 -13  -6  -2    0.20    3.70
  13  -6   2   -2.40    3.30
  13  -6   2   -3.40    3.50
 -13   6  -2    6.50    3.30
 -13   6  -2   -2.40    3.20
  13   6   2    0.90    3.70
 -14  -6  -2    3.00    6.80
  14  -6   2    1.20    3.80
 -14   6  -2    6.00    3.70
 -14   6  -2   -0.10    3.40
 -15  -6  -2    8.40    4.80
  15  -6   2    8.10    4.20
  15  -6   2   10.10    4.50
 -15   6  -2    6.90    3.80
  15   6   2    6.20    4.90
 -15   6  -2   14.80    4.40
 -16  -6  -2    5.10    4.70
  16  -6   2   11.80    4.90
  16  -6   2    2.90    4.60
  16   6   2    2.70    5.00
 -16   6  -2    3.80    4.60
 -16   6  -2   -2.70    4.20
  17  -6   2   -1.10    5.20
  17  -6   2   -6.30    4.70
 -17  -6  -2    2.90    5.00
 -17   6  -2   11.00    4.80
 -17   6  -2   -1.50    4.50
  17   6   2    4.70    5.00
  18  -6   2   16.20    6.40
  18  -6   2    2.70    5.10
 -18  -6  -2   13.60    5.50
  18   6   2    9.00    5.80
 -18   6  -2   12.90    5.60
 -18   6  -2   20.70    5.60
 -19  -6  -2  493.55   28.70
  19  -6   2  493.05   28.90
 -19   6  -2  501.05   28.40
  19   6   2  461.55   28.50
 -19   6  -2  498.85   28.60
 -20  -6  -2   -1.10    5.90
  20   6   2    5.40    6.40
 -21  -6  -2  211.08   17.10
  21  -6   2  218.28   18.90
 -21   6  -2  234.08   17.40
  21   6   2  235.48   17.90
 -21  -7   2  242.18   17.80
  21  -7  -2  256.87   18.80
 -21   7   2  236.28   17.70
  21   7  -2  229.18   17.70
  20  -7  -2   -5.00    6.50
 -20  -7   2    3.00    5.60
  20   7  -2    8.70    6.00
 -20   7   2    9.80    6.00
  19  -7  -2   -9.00    6.00
 -19  -7   2   -3.00    5.00
  19   7  -2    0.60    5.20
 -19   7   2    8.50    5.60
  18  -7  -2   13.20    6.10
 -18  -7   2    2.00    4.80
  18   7  -2   14.90    5.60
 -18   7   2    3.50    5.20
  17  -7  -2   -4.50    5.70
  17  -7  -2   -0.10    5.60
 -17  -7   2   -0.50    4.50
 -17   7   2    7.10    5.00
 -17   7   2   -5.50    4.50
  17   7  -2   -0.70    4.70
  16  -7  -2   23.20    5.90
  16  -7  -2   17.10    5.00
 -16  -7   2   30.10    5.30
  16   7  -2   22.00    5.00
 -16   7   2   27.60    5.20
 -16   7   2   19.20    5.30
  15  -7  -2   13.10    4.40
  15  -7  -2    7.70    5.00
 -15  -7   2    9.60    4.20
 -15   7   2   16.30    4.40
  15   7  -2    4.70    4.10
 -15   7   2    6.30    4.30
  14  -7  -2  158.98   11.50
  14  -7  -2  152.48   11.80
 -14  -7   2  174.08   11.60
 -14   7   2  161.88   11.50
  14   7  -2  163.68   11.50
 -14   7   2  144.19   11.10
  13  -7  -2  316.47   18.30
 -13  -7   2  318.57   18.00
  13  -7  -2  312.17   18.10
 -13   7   2  296.27   18.00
 -13   7   2  312.57   17.80
  13   7  -2  301.37   17.80
  12  -7  -2   28.80    4.70
  12  -7  -2   34.60    5.00
 -12   7   2   33.60    4.50
 -12   7   2   31.10    4.50
  12   7  -2   36.40    5.70
 -11  -7   2    8.00    3.20
  11  -7  -2    4.50    3.30
  11  -7  -2    6.80    3.20
 -11   7   2    3.50    2.90
 -11   7   2    4.80    2.90
  11   7  -2    1.50    2.90
  10  -7  -2   -3.50    2.80
  10  -7  -2   -1.50    2.80
 -10  -7   2    1.20    2.70
 -10   7   2    3.50    2.80
  10   7  -2   -0.10    2.60
 -10   7   2    4.10    2.80
   9  -7  -2  155.78    9.90
  -9  -7   2  152.68    9.60
   9  -7  -2  144.89   10.00
  -9   7   2  155.98    9.80
   9   7  -2  150.78    9.50
  -9   7   2  152.68    9.70
  -8  -7   2   81.59    6.60
   8  -7  -2   91.59    7.00
   8  -7  -2   89.79    7.30
   8   7  -2   91.19    6.50
  -8   7   2   88.59    6.70
  -8   7   2   89.29    6.90
   7  -7  -2  730.63   38.10
  -7  -7   2  742.03   37.80
   7  -7  -2  746.03   38.30
  -7   7   2  758.82   37.90
   7   7  -2  749.62   37.70
  -7   7   2  751.52   38.10
   6  -7  -2   76.09    6.80
   6  -7  -2   87.19    7.00
  -6  -7   2   80.69    6.20
  -6   7   2   88.29    6.70
   6   7  -2   87.89    6.00
  -6   7   2   90.29    6.40
  -5  -7   2 1047.90   51.89
   5  -7  -2 1033.80   52.29
   5   7  -2 1046.50   51.79
  -5   7   2 1024.60   51.99
   4  -7  -2    4.30    2.70
   4  -7  -2    3.30    2.60
  -4  -7   2    2.80    2.10
  -4   7   2    3.40    2.70
  -4   7   2    1.10    2.20
   4   7  -2    2.20    1.90
   3  -7  -2  787.32   38.90
  -3  -7   2  767.32   38.40
   3   7  -2  755.82   38.20
  -3   7   2  751.52   38.60
  -2  -7   2  221.68   11.80
   2  -7  -2  222.68   12.40
  -2   7   2  219.18   12.00
   2   7  -2  215.88   11.60
   1  -7  -2   38.50    4.40
  -1  -7   2   42.20    3.80
   1   7  -2   40.50    3.40
  -1   7   2   39.20    4.00
   0  -7  -2   14.70    2.60
   0  -7   2   16.20    2.20
   0   7  -2   11.40    1.90
   0   7   2   13.70    2.20
   1  -7   2  235.78   12.70
  -1  -7  -2  238.38   13.00
  -1   7  -2  232.68   12.40
   1   7   2  231.98   12.70
  -2  -7  -2  241.48   13.50
   2  -7   2  248.98   13.30
  -2   7  -2  237.68   13.00
   2   7   2  249.68   13.30
  -3  -7  -2  399.86   21.00
   3  -7   2  404.26   20.80
   3   7   2  393.36   20.80
  -3   7  -2  397.26   20.50
   4  -7   2   47.30    5.10
  -4  -7  -2   50.79    5.10
  -4   7  -2   46.70    4.50
   4   7   2   46.60    4.80
  -5  -7  -2   80.09    6.30
   5  -7   2   68.39    6.00
   5   7   2   70.49    5.90
  -5   7  -2   65.79    5.40
  -6  -7  -2  603.74   31.10
   6  -7   2  610.84   31.10
  -6   7  -2  601.54   30.70
   6   7   2  588.64   30.90
  -7  -7  -2   90.89    7.30
   7  -7   2   95.69    7.10
   7   7   2   85.59    7.20
  -7   7  -2   94.89    6.60
  -8  -7  -2  469.95   25.10
   8  -7   2  479.65   25.20
  -8   7  -2  482.95   24.70
   8   7   2  457.35   24.90
  -9  -7  -2 1421.36   71.99
   9  -7   2 1438.46   71.69
   9  -7   2 1415.76   71.89
  -9   7  -2 1396.76   71.49
   9   7   2 1457.15   71.79
  -9   7  -2 1462.35   71.69
  10  -7   2  326.57   18.00
  10  -7   2  319.97   18.10
 -10  -7  -2  322.37   18.20
  10   7   2  310.97   18.00
 -10   7  -2  335.87   17.90
 -10   7  -2  306.77   17.60
  11  -7   2   79.29    7.30
  11  -7   2   82.99    7.40
 -11  -7  -2   73.29    7.60
 -11   7  -2   77.99    6.80
  11   7   2   71.59    7.40
 -11   7  -2   75.79    6.80
 -12  -7  -2    3.10    3.60
  12  -7   2    1.20    3.50
  12  -7   2    7.10    3.60
  12   7   2    5.60    3.80
 -12   7  -2    4.50    3.10
 -12   7  -2    4.60    3.30
  13  -7   2  119.19    9.30
  13  -7   2  100.29    9.20
 -13  -7  -2  116.79   10.00
 -13   7  -2  104.79    8.90
 -13   7  -2  115.29    8.80
  13   7   2  101.19   11.10
 -14  -7  -2  147.39   12.10
  14  -7   2  160.18   11.70
  14  -7   2  159.98   11.50
 -14   7  -2  154.28   11.30
  14   7   2  140.89   11.70
 -14   7  -2  170.88   11.30
 -15  -7  -2    6.20    4.60
  15  -7   2    3.00    4.40
  15  -7   2    1.20    4.50
  15   7   2   -2.60    4.40
 -15   7  -2    3.60    4.20
 -15   7  -2    4.90    4.00
 -16  -7  -2    2.80    4.70
  16  -7   2    0.30    4.50
  16  -7   2   13.80    5.00
 -16   7  -2   15.00    4.90
 -16   7  -2    8.90    4.20
  16   7   2    0.50    4.90
 -17  -7  -2  187.68   13.80
  17  -7   2  173.58   13.60
  17  -7   2  180.68   13.90
 -17   7  -2  162.78   13.20
 -17   7  -2  168.78   13.30
  17   7   2  188.68   14.00
  18  -7   2    1.60    6.10
  18  -7   2    9.10    5.50
 -18  -7  -2    7.50    5.30
 -18   7  -2    3.90    5.50
 -18   7  -2    7.10    5.00
  18   7   2   12.50    5.40
 -19  -7  -2    0.70    5.60
  19  -7   2   -2.30    6.50
 -19   7  -2   -7.40    5.40
 -19   7  -2   -8.10    5.40
  19   7   2    5.90    6.20
 -20  -7  -2   14.20    6.10
  20  -7   2   20.30    8.80
 -20   7  -2   12.60    6.10
  20   7   2    9.30    6.40
 -21  -7  -2   81.39    9.80
  21   7   2   69.99    9.60
  21  -8  -2  129.69   14.40
 -21  -8   2   84.39   10.30
 -21   8   2  124.09   12.90
  21   8  -2   75.39   10.20
  20  -8  -2  -17.00    6.60
 -20  -8   2   -6.50    5.40
 -20   8   2   -1.90    6.40
  20   8  -2    0.20    5.60
 -19  -8   2  258.07   17.70
  19  -8  -2  250.77   18.90
 -19   8   2  262.77   18.00
  19   8  -2  262.07   17.80
  18  -8  -2   15.50    7.00
 -18  -8   2   22.70    5.80
  18   8  -2   33.70    6.00
 -18   8   2   18.00    6.20
  17  -8  -2  211.88   16.20
 -17  -8   2  220.98   15.20
 -17   8   2  231.98   15.20
 -17   8   2  209.28   15.50
  17   8  -2  218.48   15.30
  16  -8  -2   73.09    9.50
  16  -8  -2   89.09   10.50
 -16  -8   2   86.19    9.40
 -16   8   2   93.99    9.60
  16   8  -2   82.29    9.10
 -16   8   2   78.79    9.60
  15  -8  -2  146.19   12.50
  15  -8  -2  153.28   11.60
 -15  -8   2  140.19   11.50
  15   8  -2  147.09   11.20
 -15   8   2  156.18   11.40
 -15   8   2  163.08   11.70
  14  -8  -2   -0.40    4.00
 -14  -8   2    5.60    4.10
  14  -8  -2    6.40    4.40
 -14   8   2    7.50    4.20
  14   8  -2    4.80    3.80
 -14   8   2    3.00    4.10
 -13  -8   2   71.39    7.80
  13  -8  -2   57.09    7.70
  13  -8  -2   65.69    8.20
 -13   8   2   75.79    7.60
 -13   8   2   78.79    7.90
  13   8  -2   73.29    7.70
 -12  -8   2    8.70    3.70
  12  -8  -2   10.60    3.90
  12  -8  -2    3.30    3.70
  12   8  -2    5.80    3.40
 -12   8   2    0.40    3.20
 -12   8   2   11.90    3.50
  11  -8  -2  237.38   14.40
  11  -8  -2  231.68   14.40
 -11   8   2  235.48   14.00
 -11   8   2  246.68   14.30
  10  -8  -2   77.19    7.30
  10  -8  -2   91.39    7.70
 -10  -8   2   89.89    7.30
 -10   8   2   89.39    7.30
  10   8  -2   83.39    7.00
 -10   8   2   85.39    7.20
   9  -8  -2  301.47   16.90
   9  -8  -2  282.27   16.60
  -9  -8   2  295.57   16.40
   9   8  -2  302.47   16.30
  -9   8   2  296.77   16.60
  -9   8   2  291.27   16.30
   8  -8  -2  395.86   21.70
  -8  -8   2  399.06   21.40
   8  -8  -2  408.46   21.90
  -8   8   2  395.46   21.50
  -8   8   2  419.56   21.50
   8   8  -2  400.76   21.30
  -7  -8   2  262.37   14.30
   7  -8  -2  249.28   14.70
   7  -8  -2  254.97   14.50
   7   8  -2  259.57   14.10
  -7   8   2  254.57   14.30
  -7   8   2  253.17   14.50
   6  -8  -2  236.88   13.50
  -6  -8   2  242.98   13.10
   6  -8  -2  231.28   13.70
  -6   8   2  224.28   13.10
   6   8  -2  230.68   12.90
  -6   8   2  236.08   13.40
  -5  -8   2   10.30    2.50
   5  -8  -2    5.80    2.80
   5   8  -2    7.70    2.30
  -5   8   2    4.50    2.50
   4  -8  -2  275.77   15.30
   4  -8  -2  276.77   15.50
  -4  -8   2  274.17   14.90
   4   8  -2  265.67   14.60
  -4   8   2  284.97   15.30
  -4   8   2  273.07   15.00
  -3  -8   2  209.58   11.40
   3  -8  -2  201.18   11.90
   3   8  -2  195.88   11.00
  -3   8   2  198.98   11.50
   2  -8  -2   16.00    3.20
  -2  -8   2   22.60    2.80
   2   8  -2   23.20    2.60
  -2   8   2   19.50    3.10
  -1  -8   2  737.13   37.20
   1  -8  -2  754.32   37.70
  -1   8   2  728.13   37.30
   1   8  -2  734.03   37.00
   0  -8   2  189.48   10.80
   0  -8  -2  200.38   11.30
   0   8  -2  183.78   10.50
   0   8   2  189.28   10.90
   1  -8   2  642.14   32.40
  -1  -8  -2  631.64   32.60
  -1   8  -2  634.44   32.10
   1   8   2  640.14   32.40
   2  -8   2   76.09    6.00
  -2  -8  -2   79.69    6.40
   2   8   2   80.49    5.90
  -2   8  -2   74.09    5.40
  -3  -8  -2   58.09    5.60
   3  -8   2   57.09    5.50
   3   8   2   58.49    5.20
  -3   8  -2   54.59    4.90
  -4  -8  -2   47.30    5.30
   4  -8   2   39.70    5.00
  -4   8  -2   53.09    4.80
   4   8   2   46.40    5.00
   5  -8   2  128.79    8.50
  -5  -8  -2  120.69    8.50
  -5   8  -2  127.79    7.90
   5   8   2  129.49    8.50
  -6  -8  -2   62.09    6.00
   6  -8   2   52.79    5.50
   6   8   2   48.00    5.40
  -6   8  -2   55.29    5.10
  -7  -8  -2  922.51   46.10
   7  -8   2  890.21   46.10
  -7   8  -2  901.41   45.70
   7   8   2  907.41   45.90
   8  -8   2  266.17   15.30
  -8  -8  -2  278.67   15.40
  -8   8  -2  247.78   14.70
   8   8   2  265.77   15.10
   9  -8   2  113.89    9.00
   9  -8   2  125.39    9.20
  -9  -8  -2  130.79    9.20
  -9   8  -2  115.19    8.30
   9   8   2  122.09    8.90
  -9   8  -2  123.19    9.00
  10  -8   2    0.90    3.30
 -10  -8  -2   -2.80    3.10
  10  -8   2    2.40    3.00
  10   8   2   -3.70    3.00
 -10   8  -2    6.20    2.80
 -10   8  -2    6.50    3.10
  11  -8   2   54.69    6.60
 -11  -8  -2   41.20    5.60
  11  -8   2   39.50    5.20
 -11   8  -2   59.69    6.30
 -11   8  -2   43.70    5.10
  11   8   2   45.80    5.50
  12  -8   2   19.10    4.30
 -12  -8  -2   12.90    4.60
  12  -8   2   20.60    4.40
 -12   8  -2   22.80    3.90
 -12   8  -2   17.60    3.80
  12   8   2   18.10    4.70
  13  -8   2  175.88   12.30
  13  -8   2  177.68   12.60
 -13  -8  -2  183.48   13.00
  13   8   2  169.18   12.60
 -13   8  -2  184.38   12.00
 -13   8  -2  179.38   12.10
  14  -8   2   16.20    4.80
 -14  -8  -2   26.70    5.30
  14  -8   2   27.80    5.00
 -14   8  -2   15.50    4.40
  14   8   2   18.80    4.80
 -14   8  -2   17.40    4.30
  15  -8   2   23.40    5.40
 -15  -8  -2   15.20    5.30
  15  -8   2   24.70    5.10
 -15   8  -2   29.30    5.40
 -15   8  -2   31.20    5.20
  15   8   2   25.50    5.40
  16  -8   2  416.36   23.40
  16  -8   2  388.56   23.60
 -16  -8  -2  400.86   23.70
  16   8   2  388.16   23.30
 -16   8  -2  406.06   22.90
 -16   8  -2  388.66   23.00
  17  -8   2  177.88   13.40
  17  -8   2  149.39   13.60
 -17  -8  -2  170.98   13.70
 -17   8  -2  189.18   13.30
  17   8   2  171.28   13.40
 -17   8  -2  144.39   12.60
 -18  -8  -2  106.19   11.00
  18  -8   2   71.79    8.70
  18  -8   2   74.59    9.30
  18   8   2   92.79   11.30
 -18   8  -2  106.19   10.70
 -18   8  -2   90.39   11.30
  19  -8   2   12.10    7.10
 -19  -8  -2   24.00    6.50
  19   8   2    6.60    6.10
 -19   8  -2   12.10    6.20
 -19   8  -2    6.60    6.40
 -20  -8  -2   16.30    6.40
  20   8   2    8.50    6.60
 -21  -8  -2   76.19    9.70
  21   8   2   68.29    9.50
 -20  -9   2  103.69   12.00
  20  -9  -2   94.79   11.40
 -20   9   2  113.39   13.00
  20   9  -2   95.79   12.00
  19  -9  -2   -8.50    6.70
 -19  -9   2   -3.30    5.20
  19   9  -2   13.30    5.60
 -19   9   2    8.30    5.60
  18  -9  -2  115.89   13.80
 -18  -9   2  126.69   11.60
  18   9  -2  120.89   11.60
 -18   9   2  112.89   13.00
  17  -9  -2   29.40    6.70
 -17  -9   2   22.80    5.40
 -17   9   2    9.00    5.50
 -17   9   2   26.20    5.80
  17   9  -2   19.20    5.50
  16  -9  -2   48.50    6.80
 -16  -9   2   55.19    6.90
  16  -9  -2   56.29    7.50
 -16   9   2   57.59    7.00
  16   9  -2   61.39    6.90
 -16   9   2   59.79    7.20
  15  -9  -2   14.70    5.80
 -15  -9   2   20.90    4.70
  15  -9  -2   23.80    5.10
  15   9  -2   16.60    4.70
 -15   9   2   26.30    5.20
 -15   9   2   20.10    5.00
  14  -9  -2   64.09    7.30
 -14  -9   2   64.29    7.90
  14  -9  -2   63.29    7.20
 -14   9   2   83.49    8.30
 -14   9   2   61.89    8.20
  14   9  -2   65.19    7.90
 -13  -9   2  106.59    9.00
  13  -9  -2  113.69    9.60
  13  -9  -2   91.49    9.70
  13   9  -2  101.19    8.90
 -13   9   2  109.49    9.10
 -13   9   2  105.09    9.20
  12  -9  -2   15.00    4.10
  12  -9  -2   20.40    4.60
 -12  -9   2   11.40    3.80
 -12   9   2   19.80    4.10
  12   9  -2   11.80    3.80
 -12   9   2   16.80    4.00
 -11  -9   2   41.30    5.00
  11  -9  -2   43.90    5.40
  11  -9  -2   46.10    5.30
 -11   9   2   53.69    6.40
  11   9  -2   38.60    4.80
 -11   9   2   38.90    5.00
  10  -9  -2   24.50    4.30
  10  -9  -2   24.60    4.10
 -10  -9   2   25.00    6.20
 -10   9   2   26.80    3.80
 -10   9   2   20.10    3.80
   9  -9  -2   -0.80    3.10
  -9  -9   2    1.10    2.90
   9  -9  -2    2.10    3.00
  -9   9   2    3.40    3.00
   9   9  -2    2.20    2.60
  -9   9   2    2.60    2.90
   8  -9  -2  137.89    9.30
   8  -9  -2  135.89    9.30
  -8  -9   2  143.49    9.00
   8   9  -2  128.69    8.70
  -8   9   2  121.39    8.80
  -8   9   2  129.29    8.90
  -7  -9   2  157.38    9.80
   7  -9  -2  153.58   10.30
   7  -9  -2  149.49    9.90
   7   9  -2  162.18    9.60
  -7   9   2  151.18    9.80
  -7   9   2  158.88   10.00
   6  -9  -2   -0.30    2.70
  -6  -9   2   -0.20    2.30
   6  -9  -2   -1.20    2.90
  -6   9   2   -2.20    2.30
   6   9  -2    1.60    2.30
  -6   9   2   -1.70    2.50
  -5  -9   2  816.12   40.60
   5  -9  -2  792.22   41.10
  -5   9   2  801.22   40.70
   5   9  -2  788.52   40.40
  -5   9   2  809.72   40.70
  -4  -9   2   98.99    7.00
   4  -9  -2  106.39    7.90
   4  -9  -2  100.49    7.80
   4   9  -2  101.39    6.80
  -4   9   2  102.39    8.80
  -4   9   2  102.49    7.30
  -3  -9   2  794.42   39.70
   3  -9  -2  770.72   40.10
  -3   9   2  786.42   39.80
   3   9  -2  788.02   39.50
   2  -9  -2   70.49    6.20
  -2  -9   2   69.89    5.50
  -2   9   2   59.69    5.60
   2   9  -2   66.09    5.10
   1  -9  -2  252.87   14.50
  -1  -9   2  249.68   13.90
  -1   9   2  255.97   14.00
   1   9  -2  251.87   13.60
   0  -9  -2  573.54   29.20
   0  -9   2  556.24   28.90
   0   9  -2  560.24   28.60
   0   9   2  559.34   28.90
   1  -9   2  564.44   28.90
  -1  -9  -2  560.94   29.10
  -1   9  -2  553.24   28.50
   1   9   2  564.64   28.80
   2  -9   2   27.40    3.50
  -2  -9  -2   18.80    3.40
   2   9   2   24.30    3.30
  -2   9  -2   23.60    3.00
   3  -9   2  544.85   27.70
  -3  -9  -2  528.75   27.80
   3   9   2  532.35   27.80
  -3   9  -2  519.75   27.20
  -4  -9  -2  614.04   31.30
   4  -9   2  605.44   31.20
  -4   9  -2  594.34   30.80
   4   9   2  595.24   31.00
  -5  -9  -2    0.90    2.70
   5  -9   2    7.00    2.80
  -5   9  -2    4.40    2.30
   5   9   2    4.70    2.60
  -6  -9  -2  232.48   13.70
   6  -9   2  237.28   13.60
   6   9   2  222.98   13.30
  -6   9  -2  238.18   13.20
  -7  -9  -2   59.89    6.30
   7  -9   2   59.89    6.10
   7   9   2   57.19    5.90
  -7   9  -2   62.09    5.60
   8  -9   2  291.97   16.60
  -8  -9  -2  284.27   16.50
  -8   9  -2  276.67   15.90
   8   9   2  291.07   16.30
   9  -9   2  866.11   45.40
  -9  -9  -2  877.41   45.40
  -9   9  -2  893.31   45.00
   9   9   2  891.41   45.30
  10  -9   2    0.00    3.30
  10  -9   2    4.90    3.70
 -10  -9  -2    2.20    3.70
 -10   9  -2    0.70    3.00
 -10   9  -2    4.10    3.20
  10   9   2    3.80    3.60
  11  -9   2 1058.19   53.49
 -11  -9  -2 1044.90   53.99
  11  -9   2 1035.20   53.79
 -11   9  -2 1055.29   53.39
  11   9   2 1037.30   53.89
 -11   9  -2 1061.79   53.39
 -12  -9  -2   -1.10    4.00
  12  -9   2   -3.40    3.80
  12  -9   2    4.00    4.00
  12   9   2   -1.30    3.90
 -12   9  -2   -4.30    3.40
 -13  -9  -2  549.05   31.00
  13  -9   2  556.74   30.40
  13  -9   2  554.74   30.80
 -13   9  -2  554.24   30.30
 -13   9  -2  590.54   30.30
  13   9   2  589.04   30.80
  14  -9   2   13.10    4.80
 -14  -9  -2   16.80    4.90
  14  -9   2    9.90    4.70
  14   9   2   14.10    4.90
 -14   9  -2   20.50    5.00
 -14   9  -2   12.90    4.20
 -15  -9  -2   -5.50    4.50
  15  -9   2   14.30    5.10
  15  -9   2    0.00    4.70
  15   9   2   -0.30    4.80
 -15   9  -2    4.50    4.70
 -15   9  -2    3.40    4.00
 -16  -9  -2   10.40    5.40
  16  -9   2   14.30    5.80
  16  -9   2   15.70    5.60
 -16   9  -2   15.70    4.80
 -16   9  -2   16.50    5.50
  16   9   2   14.30    5.10
  17  -9   2    4.10    5.80
  17  -9   2    0.50    5.70
 -17  -9  -2    2.20    5.00
  17   9   2    5.30    5.00
 -17   9  -2    3.00    5.30
 -17   9  -2   -0.90    4.60
  18  -9   2  147.29   13.10
  18  -9   2  134.49   13.10
 -18  -9  -2  119.99   12.60
 -18   9  -2  124.29   13.00
  18   9   2  129.39   12.70
 -19  -9  -2   27.60    6.70
  19   9   2   22.40    6.70
 -19   9  -2   11.70    7.00
 -20  -9  -2    9.00    6.70
  20   9   2   21.20    6.90
  20 -10  -2   10.20    8.10
 -20 -10   2   10.80    6.30
 -20  10   2   -8.20   10.00
  20  10  -2   -0.90    6.10
  19 -10  -2    5.10    7.40
 -19 -10   2    5.90    5.60
  19  10  -2    6.90    5.60
 -19  10   2   12.10    6.10
 -18 -10   2   -3.10    4.80
  18  10  -2    9.10    5.20
 -17 -10   2    6.50    4.80
  17 -10  -2    6.50    6.30
 -17  10   2   19.10    5.80
  17  10  -2    7.30    4.90
 -17  10   2    9.00    5.90
 -16 -10   2  163.28   13.00
  16 -10  -2  181.38   14.60
  16 -10  -2  192.08   13.40
 -16  10   2  171.88   13.60
  16  10  -2  169.78   12.80
 -16  10   2  157.48   13.30
  15 -10  -2  389.16   21.90
 -15 -10   2  358.46   21.50
  15 -10  -2  347.27   22.00
 -15  10   2  372.26   21.60
 -15  10   2  367.56   21.30
  15  10  -2  352.76   21.20
 -14 -10   2  116.09   10.30
  14 -10  -2  116.49   11.00
  14 -10  -2  117.69   11.00
 -14  10   2  118.39   10.40
  14  10  -2  128.99   10.10
 -14  10   2  134.79   10.60
 -13 -10   2   47.60    6.10
  13 -10  -2   44.90    6.40
  13 -10  -2   59.59    6.70
  13  10  -2   44.90    5.70
 -13  10   2   55.49    6.20
 -13  10   2   44.00    5.80
 -12 -10   2   47.80    5.90
  12 -10  -2   42.80    5.90
  12 -10  -2   54.79    6.20
 -12  10   2   54.19    7.00
 -12  10   2   49.99    5.70
  12  10  -2   53.59    6.70
  11 -10  -2    8.00    4.10
 -11 -10   2    2.30    3.40
  11 -10  -2   -4.80    3.50
 -11  10   2   -6.20    3.20
  11  10  -2   -0.70    3.10
 -11  10   2   -2.00    3.40
 -10 -10   2  219.08   13.70
  10 -10  -2  224.98   13.80
  10 -10  -2  216.58   14.00
 -10  10   2  214.18   13.30
 -10  10   2  226.68   13.40
  10  10  -2  221.28   13.30
   9 -10  -2   36.30    4.80
   9 -10  -2   36.50    4.80
  -9  10   2   42.30    5.60
  -9  10   2   45.20    5.90
  -8 -10   2  317.07   17.80
   8 -10  -2  325.97   18.30
   8 -10  -2  339.17   18.10
  -8  10   2  310.27   17.70
   8  10  -2  312.27   17.60
  -8  10   2  311.47   17.80
   7 -10  -2  489.25   25.40
   7 -10  -2  474.55   25.70
  -7 -10   2  472.25   25.20
  -7  10   2  472.95   25.30
  -7  10   2  474.15   25.10
   7  10  -2  480.05   25.00
   6 -10  -2   80.69    7.10
   6 -10  -2   81.39    7.10
  -6 -10   2   86.09    6.60
  -6  10   2   71.29    6.50
  -6  10   2   72.79    6.60
   6  10  -2   82.89    6.30
  -5 -10   2  122.19    8.10
   5 -10  -2  120.79    8.60
   5 -10  -2  112.99    8.60
   5  10  -2  116.59    7.80
  -5  10   2  117.09    8.20
  -5  10   2  122.09    8.30
   4 -10  -2  319.07   19.20
   4 -10  -2  293.17   16.90
  -4 -10   2  300.27   16.40
   4  10  -2  295.27   16.10
  -4  10   2  296.07   16.50
   3 -10  -2  548.55   29.10
  -3 -10   2  558.24   28.60
  -3  10   2  551.24   28.70
   3  10  -2  556.64   28.30
   2 -10  -2  700.93   36.50
  -2 -10   2  707.63   36.10
   2  10  -2  711.43   35.80
  -2  10   2  709.33   36.10
  -1 -10   2  457.95   23.90
   1 -10  -2  460.55   24.30
  -1  10   2  451.35   23.80
   1  10  -2  453.15   23.60
   0 -10  -2  441.66   23.50
   0 -10   2  433.66   23.20
   0  10  -2  446.66   22.80
   0  10   2  438.36   23.10
   1 -10   2  146.39    9.20
  -1 -10  -2  156.38    9.70
   1  10   2  140.79    9.20
  -1  10  -2  147.89    8.80
  -2 -10  -2   33.40    4.20
   2 -10   2   37.70    5.00
   2  10   2   40.40    4.60
  -2  10  -2   32.30    4.10
   3 -10   2  230.38   13.10
  -3 -10  -2  221.78   13.10
   3  10   2  212.98   12.70
  -3  10  -2  225.88   12.50
  -4 -10  -2   48.80    5.70
   4 -10   2   48.80    5.50
   4  10   2   51.29    5.30
  -4  10  -2   48.00    5.10
  -5 -10  -2  226.18   13.20
   5 -10   2  218.78   13.00
   5  10   2  216.68   12.80
  -5  10  -2  221.28   12.70
   6 -10   2  312.97   17.40
  -6 -10  -2  306.07   17.30
  -6  10  -2  309.57   16.80
   6  10   2  298.57   17.10
   7 -10   2   65.99    6.70
  -7 -10  -2   63.49    6.60
   7  10   2   66.59    6.40
  -7  10  -2   57.99    5.90
   8 -10   2   46.10    6.30
  -8 -10  -2   46.10    5.40
   8  10   2   40.10    5.00
  -8  10  -2   45.90    4.90
   9 -10   2  153.38   11.10
  -9 -10  -2  158.08   11.30
   9  10   2  174.08   11.10
  -9  10  -2  156.88   10.50
  10 -10   2  310.87   17.70
  10 -10   2  302.57   17.90
 -10 -10  -2  284.67   18.70
 -10  10  -2  307.17   17.50
 -10  10  -2  310.97   17.30
  10  10   2  277.97   18.60
  11 -10   2  206.58   13.60
 -11 -10  -2  198.38   13.90
  11 -10   2  193.08   13.50
  11  10   2  208.88   13.70
 -11  10  -2  210.48   13.20
 -11  10  -2  208.88   13.10
 -12 -10  -2   85.49    9.20
  12 -10   2   95.09    8.90
  12 -10   2   86.09    9.10
  12  10   2   79.79    8.70
 -12  10  -2   89.39    8.30
 -12  10  -2   76.39    8.40
 -13 -10  -2   64.49    8.80
  13 -10   2   67.39    8.90
  13 -10   2   59.79    7.00
 -13  10  -2   69.09    7.70
  13  10   2   71.79    8.70
 -13  10  -2   75.59    8.40
 -14 -10  -2    2.00    4.60
  14 -10   2   -6.80    4.40
  14 -10   2    1.00    4.60
 -14  10  -2   -0.30    3.80
 -14  10  -2    4.90    4.40
  14  10   2    6.60    4.70
 -15 -10  -2   26.40    6.10
  15 -10   2   41.80    6.70
  15 -10   2   39.90    6.40
 -15  10  -2   39.60    5.70
 -15  10  -2   34.90    6.20
  15  10   2   43.40    6.30
  16 -10   2  131.99   12.50
  16 -10   2  132.39   12.50
 -16 -10  -2  124.49   12.30
 -16  10  -2  138.99   11.00
  16  10   2  146.89   12.20
 -16  10  -2  138.39   12.20
  17 -10   2   14.60    6.20
 -17 -10  -2   12.60    5.60
  17  10   2   14.40    6.00
 -17  10  -2   10.30    5.90
  18 -10   2   98.49   12.70
 -18 -10  -2  100.39   11.70
 -18  10  -2  108.99   12.50
  18  10   2  102.49   12.10
 -19 -10  -2   15.30    6.30
  19  10   2   21.20    6.70
 -20 -10  -2   28.60    7.40
  20  10   2   13.20    7.40
 -19 -11   2   -2.90    5.70
  19 -11  -2   -1.90    9.30
  19  11  -2   -7.10    5.50
 -18 -11   2   10.70    5.60
  18 -11  -2   23.30   13.10
 -18  11   2   25.70    7.40
  18  11  -2   10.30    5.50
 -17 -11   2   18.50    5.50
  17 -11  -2   20.30    7.30
 -17  11   2   31.70    6.50
  17  11  -2   19.60    5.50
 -17  11   2   20.10    8.10
  16 -11  -2  175.88   14.00
  16 -11  -2  186.98   15.10
 -16 -11   2  166.58   13.30
 -16  11   2  178.38   14.00
  16  11  -2  158.58   12.90
 -16  11   2  195.58   13.80
  15 -11  -2    5.90    5.30
 -15 -11   2   -1.30    4.20
  15 -11  -2  -11.50    5.00
  15  11  -2    3.50    4.10
 -15  11   2    5.80    5.10
 -15  11   2    1.20    4.70
  14 -11  -2    9.90    5.40
 -14 -11   2   10.40    4.50
  14 -11  -2    2.80    5.00
 -14  11   2    8.50    4.70
  14  11  -2    9.80    4.30
 -14  11   2   10.00    4.70
  13 -11  -2  457.65   25.70
 -13 -11   2  442.16   25.40
  13 -11  -2  449.86   25.70
 -13  11   2  470.05   25.40
 -13  11   2  457.25   25.30
  13  11  -2  451.35   25.20
  12 -11  -2   63.69    8.10
 -12 -11   2   45.60    5.90
  12 -11  -2   42.50    6.10
 -12  11   2   43.00    5.60
 -12  11   2   38.20    5.50
  12  11  -2   32.90    5.20
  11 -11  -2   14.80    4.30
 -11 -11   2   11.80    3.90
  11 -11  -2    3.20    4.10
  11  11  -2    0.80    3.30
 -11  11   2    1.40    3.90
 -11  11   2    2.50    3.70
  10 -11  -2  210.48   14.00
 -10 -11   2  211.98   13.50
  10 -11  -2  224.18   13.70
 -10  11   2  214.88   13.20
 -10  11   2  208.88   13.40
  10  11  -2  209.78   13.10
   9 -11  -2  146.99   10.90
   9 -11  -2  150.18   11.20
  -9 -11   2  158.38   10.80
  -9  11   2  169.28   10.80
   9  11  -2  162.08   10.50
  -9  11   2  149.88   10.70
   8 -11  -2    8.20    3.60
   8 -11  -2    8.60    3.50
  -8 -11   2   10.60    3.50
   8  11  -2    5.90    3.10
  -8  11   2    9.30    3.40
  -8  11   2    3.90    3.10
   7 -11  -2  135.09    9.80
   7 -11  -2  137.79    9.50
  -7 -11   2  122.19   10.10
   7  11  -2  129.99    9.80
  -7  11   2  136.29    9.40
  -7  11   2  138.79    9.30
  -6 -11   2   72.09    6.50
   6 -11  -2   70.39    7.10
   6 -11  -2   69.29    7.00
  -6  11   2   83.19    6.70
  -6  11   2   70.29    6.60
   6  11  -2   63.69    6.10
   5 -11  -2  129.49    9.50
  -5 -11   2  135.99    8.90
   5 -11  -2  124.99    9.40
  -5  11   2  124.19    8.70
   5  11  -2  131.49    8.50
  -5  11   2  122.59    9.00
  -4 -11   2  367.46   19.70
   4 -11  -2  355.46   20.20
  -4  11   2  373.46   19.80
   4  11  -2  360.06   19.40
   3 -11  -2    4.00    3.10
  -3 -11   2    5.80    2.70
   3  11  -2    5.30    2.40
  -3  11   2    3.10    2.60
  -2 -11   2   85.59    6.80
   2 -11  -2   85.79    7.30
  -2  11   2   91.09    6.90
   2  11  -2   94.09    6.40
   1 -11  -2   56.99    6.10
  -1 -11   2   45.80    5.50
  -1  11   2   57.19    5.50
   1  11  -2   45.70    4.80
   0 -11  -2  498.05   26.50
   0 -11   2  501.45   26.10
   0  11  -2  497.15   25.70
   0  11   2  492.85   26.00
   1 -11   2    9.00    3.00
  -1 -11  -2   13.00    3.30
   1  11   2   11.20    3.00
  -1  11  -2   10.30    2.50
  -2 -11  -2  509.05   26.40
   2 -11   2  504.15   26.20
   2  11   2  495.25   26.00
  -2  11  -2  476.45   25.70
  -3 -11  -2   46.50    5.80
   3 -11   2   44.70    4.80
  -3  11  -2   43.90    4.90
   3  11   2   38.00    5.20
   4 -11   2  655.43   33.60
  -4 -11  -2  652.83   33.80
   4  11   2  631.24   33.40
  -4  11  -2  645.54   33.20
   5 -11   2   30.50    4.10
  -5 -11  -2   22.10    4.00
  -5  11  -2   24.20    3.60
   5  11   2   21.80    3.70
  -6 -11  -2  221.88   13.60
   6 -11   2  231.08   13.80
   6  11   2  215.58   13.30
  -6  11  -2  222.08   13.00
   7 -11   2  910.51   46.70
  -7 -11  -2  922.81   46.70
   7  11   2  892.21   46.40
  -7  11  -2  902.01   46.20
   8 -11   2   30.20    4.60
  -8 -11  -2   19.70    4.40
  -8  11  -2   25.30    4.20
   8  11   2   22.00    4.40
   9 -11   2   36.80    5.40
   9  11   2   35.80    8.30
  -9  11  -2   35.70    4.80
  10 -11   2   33.00    5.40
 -10 -11  -2   43.30    5.90
  10  11   2   36.50    5.20
 -10  11  -2   37.40    5.10
  11 -11   2  478.35   26.80
  11 -11   2  479.65   27.20
 -11 -11  -2  480.45   27.00
 -11  11  -2  487.45   26.60
 -11  11  -2  499.55   26.40
  11  11   2  497.65   26.80
  12 -11   2    6.50    4.70
  12 -11   2    0.40    4.70
 -12 -11  -2    8.40    4.60
  12  11   2    1.50    4.20
 -12  11  -2    1.20    3.90
 -12  11  -2   -2.00    4.00
  13 -11   2  253.87   16.50
  13 -11   2  248.48   16.90
 -13 -11  -2  260.27   16.80
 -13  11  -2  259.97   15.60
 -13  11  -2  270.77   16.40
  13  11   2  245.28   16.50
  14 -11   2   21.30    5.80
  14 -11   2   22.90    5.90
 -14 -11  -2   12.00    5.40
 -14  11  -2   19.40    4.50
  14  11   2   18.50    5.30
 -14  11  -2   14.60    5.00
 -15 -11  -2  106.49   11.30
  15 -11   2  123.49   12.20
  15 -11   2  117.69   13.40
 -15  11  -2  116.39   12.90
  15  11   2   76.19   10.80
 -16 -11  -2   52.69    7.70
  16  11   2   41.70    7.00
 -17 -11  -2    2.10    5.40
  17 -11   2   11.40    6.30
  17  11   2  -12.70    4.90
 -17  11  -2    6.60    6.00
  18 -11   2    5.50    6.50
 -18 -11  -2   -0.60    5.60
  18  11   2    3.30    5.60
 -18  11  -2   -2.10    6.50
 -19 -11  -2   91.09   12.80
  19  11   2  133.69   12.90
 -19  11  -2   97.29   12.50
 -18 -12   2   86.69   11.10
  18  12  -2   72.79    8.90
  17 -12  -2   24.10    7.60
 -17 -12   2   24.40    6.00
  17  12  -2   14.80    5.70
  16 -12  -2    1.00    7.00
  16 -12  -2   16.60    6.20
 -16 -12   2   17.00    5.40
 -16  12   2   17.30    5.40
 -16  12   2   16.50    6.30
  16  12  -2   13.10    5.10
 -15 -12   2   72.99    9.30
  15 -12  -2   87.69   10.60
  15 -12  -2   74.49    8.50
 -15  12   2   88.59   10.60
  15  12  -2   76.89    9.00
 -15  12   2   81.39    9.80
  14 -12  -2  298.37   18.80
 -14 -12   2  275.27   17.90
  14 -12  -2  273.87   18.60
 -14  12   2  309.27   18.30
  14  12  -2  292.47   17.80
 -14  12   2  295.27   17.90
 -13 -12   2    4.10    4.30
  13 -12  -2    7.70    5.30
  13 -12  -2    4.10    5.00
  13  12  -2   11.10    4.30
 -13  12   2    8.90    4.50
 -13  12   2    7.00    4.70
 -12 -12   2  264.47   17.20
  12 -12  -2  288.67   17.90
  12 -12  -2  279.87   17.50
  12  12  -2  283.67   16.90
 -12  12   2  284.17   17.10
 -12  12   2  284.97   17.40
  11 -12  -2   -2.90    3.90
 -11 -12   2   -0.10    3.70
  11 -12  -2    5.70    4.40
 -11  12   2   -4.80    3.50
  11  12  -2    1.90    3.70
 -11  12   2    6.20    4.00
  10 -12  -2   91.79    9.20
  10 -12  -2   99.29    9.20
 -10 -12   2   90.89    8.70
 -10  12   2   91.99    8.40
  10  12  -2   91.99    8.20
 -10  12   2   97.99    8.90
  -9 -12   2  487.35   26.30
   9 -12  -2  478.05   26.70
   9 -12  -2  466.85   26.30
  -9  12   2  484.55   26.20
  -9  12   2  509.25   26.30
   9  12  -2  476.65   26.00
  -8 -12   2   40.80    5.10
   8 -12  -2   43.80    5.30
   8 -12  -2   56.79    7.30
  -8  12   2   34.30    4.80
   8  12  -2   51.69    6.00
  -8  12   2   34.40    4.70
   7 -12  -2    9.00    4.00
   7 -12  -2   20.40    4.20
  -7 -12   2    7.70    3.50
   7  12  -2   12.80    3.40
  -7  12   2   18.70    3.60
  -7  12   2   15.00    3.70
  -6 -12   2  317.97   18.90
   6 -12  -2  338.97   18.80
   6 -12  -2  312.17   19.00
   6  12  -2  320.47   18.40
  -6  12   2  355.46   18.60
  -6  12   2  345.67   18.60
   5 -12  -2  467.35   25.50
   5 -12  -2  499.35   25.40
  -5 -12   2  451.25   25.90
  -5  12   2  454.55   24.90
  -5  12   2  486.85   25.40
   5  12  -2  442.36   25.50
  -4 -12   2  210.88   12.90
   4 -12  -2  214.78   13.50
   4  12  -2  213.48   12.60
  -4  12   2  222.08   13.00
   3 -12  -2 1001.20   51.09
  -3 -12   2  979.10   50.59
  -3  12   2 1009.70   50.59
   3  12  -2  997.10   50.29
  -2 -12   2  654.93   33.70
   2 -12  -2  651.63   34.10
  -2  12   2  659.33   33.60
   2  12  -2  629.84   33.20
   1 -12  -2    8.70    3.40
  -1 -12   2    5.40    3.00
   1  12  -2    4.40    2.60
  -1  12   2    9.10    3.00
   0 -12  -2  145.09   10.10
   0 -12   2  143.19    9.80
   0  12   2  149.09    9.50
   0  12  -2  145.89    9.20
  -1 -12  -2   83.49    7.70
   1 -12   2   90.29    7.20
   1  12   2   87.59    7.10
  -1  12  -2   90.49    6.80
   2 -12   2   61.59    6.70
  -2 -12  -2   67.79    6.90
  -2  12  -2   70.89    6.00
   2  12   2   60.49    6.30
  -3 -12  -2    1.50    3.20
   3 -12   2    2.20    2.90
   3  12   2   -1.10    2.80
  -3  12  -2    0.90    2.50
   4 -12   2   51.79    6.40
  -4 -12  -2   49.40    6.80
  -4  12  -2   45.70    5.60
   4  12   2   53.79    6.00
   5 -12   2   32.80    4.80
  -5 -12  -2   26.80    4.60
   5  12   2   28.80    4.40
  -5  12  -2   34.00    4.30
   6 -12   2   26.00    4.60
  -6 -12  -2   23.90    4.60
   6  12   2   23.20    4.30
  -6  12  -2   23.40    3.80
   7 -12   2   95.09    8.60
  -7 -12  -2   94.69   10.00
  -7  12  -2   89.89    7.80
   7  12   2   80.19    9.30
  -8 -12  -2    0.20    3.70
   8 -12   2    6.30    3.90
   8  12   2    6.40    3.70
  -8  12  -2    3.90    3.50
  -9 -12  -2   95.19    9.00
   9 -12   2   85.19    9.20
  -9  12  -2   98.79    8.70
   9  12   2  110.69    9.00
  10 -12   2   79.09    9.00
 -10 -12  -2   80.19    8.80
  10  12   2   85.29    8.50
 -10  12  -2   90.79    8.30
  11 -12   2   35.80    6.50
 -11 -12  -2   29.20    5.50
  11 -12   2   26.70    5.90
 -11  12  -2   28.50    6.20
 -11  12  -2   25.90    5.40
  11  12   2   31.40    5.30
 -12 -12  -2  379.16   22.90
  12 -12   2  409.16   22.80
 -12  12  -2  331.97   26.30
 -12  12  -2  397.86   22.20
  12  12   2  415.26   22.80
 -13 -12  -2  111.09   10.60
  13 -12   2  125.69   12.80
  13 -12   2   95.19   11.60
 -13  12  -2  110.09   10.30
  13  12   2  122.89   10.50
  14 -12   2  197.38   14.70
 -14 -12  -2  189.08   14.30
  14  12   2  190.48   14.10
 -14  12  -2  190.58   14.10
  15 -12   2    7.40    5.70
 -15 -12  -2   17.90    5.40
 -15  12  -2   13.10    5.40
  15  12   2   11.20    5.70
  16 -12   2  117.19   12.40
 -16 -12  -2  123.09   11.90
  16  12   2  106.09   11.70
 -16  12  -2  120.69   12.10
  17 -12   2  -11.40    5.80
 -17 -12  -2  -14.20    5.30
 -17  12  -2   -2.60    5.90
  17  12   2    7.90    5.90
 -18 -12  -2   99.69   12.90
  18 -12   2  103.89   12.80
 -18  12  -2  121.09   13.10
  18  12   2  110.09   12.80
 -18 -13   2    4.00    6.00
  18  13  -2    6.70    6.20
 -17 -13   2   51.89    7.60
  17  13  -2   42.60    7.20
  16 -13  -2  369.16   22.50
 -16 -13   2  346.67   21.40
  16  13  -2  324.17   21.10
 -16  13   2  344.47   22.10
  15 -13  -2   15.90    6.70
 -15 -13   2   23.30    5.70
  15 -13  -2   21.40    6.40
  15  13  -2   22.80    5.10
 -15  13   2   17.00    6.50
  14 -13  -2  134.89   12.60
 -14 -13   2  125.99   11.50
  14 -13  -2  138.19   12.90
  14  13  -2  116.39   10.90
 -14  13   2  144.29   12.30
 -14  13   2  156.48   11.20
  13 -13  -2  -10.00    5.30
  13 -13  -2   -4.70    5.20
 -13 -13   2    1.70    4.20
  13  13  -2   -5.20    4.00
 -13  13   2   -0.40    5.00
 -13  13   2   -3.10    4.50
  12 -13  -2  771.62   40.30
 -12 -13   2  735.33   40.00
  12 -13  -2  784.02   40.80
 -12  13   2  739.33   40.10
  12  13  -2  729.63   39.70
 -12  13   2  781.32   39.90
 -11 -13   2    9.00    4.20
  11 -13  -2   21.00    5.30
  11 -13  -2   13.80    4.80
 -11  13   2   12.90    4.20
  11  13  -2   12.30    4.10
 -11  13   2    6.60    4.50
 -10 -13   2  125.19   10.30
  10 -13  -2  138.69   10.90
  10 -13  -2  116.39   10.90
 -10  13   2  133.19    9.90
  10  13  -2  123.39    9.70
 -10  13   2  124.99   10.40
   9 -13  -2   33.70    5.80
  -9 -13   2   28.90    4.80
   9 -13  -2   26.10    5.10
   9  13  -2   30.30    4.70
  -9  13   2   30.70    4.60
  -9  13   2   29.20    5.20
  -8 -13   2  201.08   12.60
   8 -13  -2  192.88   13.10
   8 -13  -2  190.98   13.50
   8  13  -2  181.78   12.30
  -8  13   2  205.58   12.90
  -8  13   2  185.78   12.60
  -7 -13   2    1.20    3.30
   7 -13  -2   -2.00    4.00
   7 -13  -2   -0.40    3.90
  -7  13   2    1.70    3.60
  -7  13   2   -1.50    3.40
   7  13  -2    4.30    3.20
  -6 -13   2   27.40    4.50
   6 -13  -2   28.60    5.20
   6 -13  -2   36.00    5.10
  -6  13   2   30.00    4.70
   6  13  -2   43.30    5.60
  -6  13   2   27.40    4.60
  -5 -13   2   81.69    7.70
   5 -13  -2   89.49    8.50
   5  13  -2   77.29    7.00
  -5  13   2   83.49    7.60
  -4 -13   2  178.38   11.10
   4 -13  -2  153.78   11.50
  -4  13   2  162.68   10.90
   4  13  -2  157.98   10.40
   3 -13  -2    6.80    3.70
  -3 -13   2    8.40    4.20
  -3  13   2    6.40    3.30
   3  13  -2    4.20    3.10
   2 -13  -2   49.30    5.70
  -2  13   2   49.50    6.20
  -1 -13   2   28.40    4.90
   1 -13  -2   23.40    4.40
  -1  13   2   25.80    4.00
   1  13  -2   25.30    4.40
   0 -13  -2  276.37   15.80
   0 -13   2  260.57   15.50
   0  13  -2  252.47   14.90
   0  13   2  246.98   15.00
  -1 -13  -2   10.00    3.70
   1 -13   2   16.00    3.70
  -1  13  -2    9.60    3.10
   1  13   2   10.50    3.50
  -2 -13  -2   10.10    3.80
   2 -13   2   10.40    3.60
   2  13   2    6.10    3.50
  -2  13  -2    6.00    2.90
  -3 -13  -2    5.80    3.60
   3 -13   2    0.90    3.40
  -3  13  -2    4.50    3.00
   3  13   2    6.10    3.40
  -4 -13  -2 1164.48   57.69
   4 -13   2 1113.79   57.59
   4  13   2 1127.69   57.29
  -4  13  -2 1106.09   57.09
  -5 -13  -2  388.06   22.70
   5 -13   2  374.76   21.60
  -5  13  -2  365.06   21.10
   6 -13   2   18.80    5.50
  -6 -13  -2   14.20    4.50
   6  13   2   15.50    4.20
  -7 -13  -2   35.30    5.30
   7  13   2   35.40    5.10
   8 -13   2   98.99   11.60
  -8 -13  -2   96.19    9.20
   8  13   2  113.69    9.30
  -8  13  -2   84.69    9.80
  -9 -13  -2    0.80    4.10
   9 -13   2    1.30    4.30
  -9  13  -2    4.80    4.00
   9  13   2    4.70    3.80
  10 -13   2   15.00    4.90
 -10 -13  -2    9.90    4.40
  10  13   2   11.60    4.30
 -10  13  -2    3.70    4.10
  11 -13   2  101.59   10.30
 -11 -13  -2   91.99    9.80
  11  13   2   99.59    9.40
 -11  13  -2   86.19    9.40
  12 -13   2   84.09   10.10
 -12 -13  -2   86.39    9.90
 -12  13  -2   81.69    9.50
  12  13   2   87.89    9.20
  13 -13   2   58.89    7.70
 -13 -13  -2   54.49    7.30
 -13  13  -2   64.49    7.30
  13  13   2   73.79    9.00
 -14 -13  -2   26.60    5.70
  14 -13   2   31.80    6.40
  14  13   2   32.30    6.00
 -14  13  -2   24.60    5.90
  15 -13   2   37.10    7.00
 -15 -13  -2   35.30    6.60
 -15  13  -2   22.00    6.00
  15  13   2   25.10    6.10
 -16 -13  -2    3.60    5.60
  16 -13   2   11.30    6.30
  16  13   2    2.30    5.60
 -16  13  -2    6.70    5.70
 -17 -13  -2    2.40    5.80
  17 -13   2    8.00    6.30
  17  13   2   -4.60    5.70
 -17  13  -2    1.70    6.30
  18 -13   2   56.69    8.20
 -18 -13  -2   44.70    8.00
 -18  13  -2   55.09    8.50
  18  13   2   28.00    7.80
 -17 -14   2    4.40    5.90
  17  14  -2    9.80    6.20
 -16 -14   2   74.29    8.50
 -16  14   2   80.19   10.90
  16  14  -2   66.79    8.30
 -15 -14   2    4.80    4.90
  15  14  -2    7.30    5.00
 -14 -14   2    1.70    4.60
  14 -14  -2   -2.10    7.20
  14  14  -2    2.10    4.30
  13 -14  -2   -2.40    5.80
 -13 -14   2    3.20    4.30
 -13  14   2   -0.90    5.60
  13  14  -2    4.50    4.10
 -12 -14   2  112.49   10.00
  12 -14  -2  112.29   11.50
  12 -14  -2  109.69   11.20
 -12  14   2   99.49   10.70
  12  14  -2   93.59    9.40
  11 -14  -2   12.30    5.30
 -11 -14   2   20.70    4.80
  11 -14  -2    7.20    5.50
  11  14  -2   13.10    4.30
 -11  14   2   17.40    4.50
 -11  14   2   17.00    5.30
 -10 -14   2  489.75   27.60
  10 -14  -2  495.35   28.40
  10 -14  -2  515.65   28.00
 -10  14   2  504.05   27.70
  10  14  -2  476.65   27.20
 -10  14   2  528.95   27.40
   9 -14  -2   72.89    9.80
   9 -14  -2   82.99    9.40
  -9 -14   2   86.69    8.40
  -9  14   2   88.89    8.50
   9  14  -2   88.69    8.20
  -9  14   2   70.49    8.90
   8 -14  -2  379.06   22.40
   8 -14  -2  387.26   21.90
  -8 -14   2  386.76   21.50
  -8  14   2  385.06   21.60
  -8  14   2  356.56   21.20
   8  14  -2  366.96   20.90
   7 -14  -2    5.40    4.70
   7 -14  -2   -4.40    4.30
  -7 -14   2    3.50    3.60
  -7  14   2    2.80    3.90
  -7  14   2    3.40    3.80
   7  14  -2    2.70    3.20
   6 -14  -2  149.59   12.40
   6 -14  -2  146.39   11.50
  -6 -14   2  149.19   10.50
  -6  14   2  130.69   10.60
   6  14  -2  146.99    9.90
  -6  14   2  134.49   10.90
   5 -14  -2  119.49   10.50
  -5 -14   2  120.29    9.50
  -5  14   2  126.59    9.70
   5  14  -2  122.19    8.90
  -4 -14   2   17.80    4.20
   4 -14  -2   24.30    5.00
  -4  14   2   21.60    4.30
   4  14  -2   26.90    4.00
  -3 -14   2    4.00    3.50
   3 -14  -2    9.40    4.20
  -3  14   2   10.30    3.80
   3  14  -2    6.60    3.20
   2 -14  -2    8.40    4.10
  -2 -14   2    1.30    3.50
   2  14  -2    4.40    3.00
  -2  14   2    3.40    3.60
  -1 -14   2   36.10    5.00
   1 -14  -2   40.30    5.70
  -1  14   2   42.70    5.20
   1  14  -2   41.50    4.70
   0 -14   2   12.70    3.90
   0 -14  -2   14.80    4.30
   0  14  -2   12.80    3.30
   0  14   2   12.00    3.80
   1 -14   2   53.29    6.90
  -1 -14  -2   57.89    7.70
  -1  14  -2   57.59    6.30
   1  14   2   52.89    7.10
  -2 -14  -2   67.49    9.80
   2 -14   2   59.59    7.40
   2  14   2   62.29    9.20
  -2  14  -2   60.59    6.40
   3 -14   2    0.60    3.50
  -3 -14  -2    3.50    4.50
   3  14   2    2.50    4.20
  -3  14  -2   -0.40    3.00
   4 -14   2   13.00    4.20
  -4 -14  -2    4.90    4.00
  -4  14  -2   10.00    3.60
   4  14   2   11.40    3.90
  -5 -14  -2  161.18   11.40
   5 -14   2  137.49   10.90
   5  14   2  135.59   10.50
  -5  14  -2  146.59   10.40
  -6 -14  -2   66.49    8.10
   6 -14   2   74.29    8.10
  -6  14  -2   48.90    5.80
   6  14   2   59.69    7.40
  -7 -14  -2    3.60    4.30
   7 -14   2   -0.70    4.00
   7  14   2    5.70    3.80
  -7  14  -2    8.90    3.80
  -8 -14  -2   13.00    4.60
   8 -14   2   18.70    4.90
   8  14   2   13.80    4.40
  -8  14  -2    4.90    3.80
  -9 -14  -2    6.80    4.30
   9 -14   2    9.90    4.80
  -9  14  -2    5.50    4.20
   9  14   2   11.50    4.40
 -10 -14  -2   33.80    6.00
  10 -14   2   33.40    6.20
 -10  14  -2   38.50    5.60
  10  14   2   35.30    5.50
  11 -14   2    5.30    4.80
 -11 -14  -2    2.70    4.30
  11  14   2   -1.20    4.30
 -11  14  -2   -0.10    4.60
  12 -14   2   85.29   10.60
 -12 -14  -2   98.69   10.00
 -12  14  -2   90.59   10.00
  12  14   2   93.89    9.90
 -13 -14  -2   91.49   10.40
  13 -14   2  112.19   11.10
  13  14   2   95.59   10.50
 -13  14  -2   92.79   10.40
  14 -14   2  363.66   22.20
 -14 -14  -2  335.17   22.00
  14  14   2  370.66   22.00
 -14  14  -2  353.56   21.60
 -15 -14  -2    8.40    5.70
  15 -14   2   19.90    6.20
 -15  14  -2    8.20    5.50
  15  14   2   -5.90    5.10
  16 -14   2  108.09   13.20
 -16 -14  -2  118.99   12.70
 -16  14  -2  144.89   12.90
  16  14   2  145.49   13.10
  17 -14   2    4.70    6.80
 -17 -14  -2   -4.40    6.00
  17  14   2   15.50    6.60
 -17  14  -2   12.90    6.60
 -16 -15   2  195.88   15.10
  16  15  -2  161.38   14.60
 -16  15   2  208.78   20.70
  15 -15  -2   44.30    7.60
 -15 -15   2   29.30    6.20
 -15  15   2   32.20    7.30
  15  15  -2   32.10    6.30
  14 -15  -2  671.83   37.10
 -14 -15   2  645.04   36.30
  14  15  -2  625.54   35.70
 -14  15   2  711.23   36.70
  13 -15  -2    7.10    6.00
 -13 -15   2    3.90    4.80
  13  15  -2    6.80    4.80
 -13  15   2   -2.60    5.50
  12 -15  -2  439.86   24.90
 -12 -15   2  385.86   23.50
  12  15  -2  403.16   23.30
 -12  15   2  408.36   23.90
 -11 -15   2   48.40    6.40
  11 -15  -2   49.20    7.60
 -11  15   2   49.99    7.10
  11  15  -2   62.39    8.00
 -10 -15   2  121.69   10.30
  10 -15  -2   98.19   11.50
 -10  15   2   97.99   10.60
  10  15  -2  125.79    9.80
   9 -15  -2   74.99    9.40
  -9 -15   2   91.29    8.70
   9 -15  -2   92.29   11.30
   9  15  -2   83.49    8.30
  -9  15   2   67.79    9.30
   8 -15  -2   -8.10    5.80
  -8 -15   2    1.30    3.80
   8 -15  -2   -3.10    5.00
  -8  15   2   -2.50    4.40
   8  15  -2    0.00    3.60
  -7 -15   2   27.10    4.80
   7 -15  -2   30.00    6.10
  -7  15   2   20.10    6.10
  -7  15   2   28.70    5.10
   7  15  -2   28.30    4.50
   6 -15  -2    0.80    8.20
  -6 -15   2    8.90    4.00
   6  15  -2   16.10    3.90
  -6  15   2   20.00    5.80
  -5 -15   2   67.89    7.90
  -5  15   2   66.69    8.20
   5  15  -2   76.39    7.50
  -4 -15   2    5.60    3.70
  -4  15   2    1.60    4.80
   4  15  -2   -2.00    3.10
  -3 -15   2   13.60    4.20
   3 -15  -2   20.50    6.10
   3  15  -2   14.70    3.90
  -3  15   2   17.60    5.30
   2 -15  -2   -0.90    5.30
  -2 -15   2   -1.40    3.40
   2  15  -2   -0.80    3.20
  -2  15   2    5.40    3.90
   1 -15  -2   46.00    6.20
  -1 -15   2   47.70    5.80
   1  15  -2   46.70    5.20
  -1  15   2   54.89    7.10
   0 -15   2   21.20    4.50
   0 -15  -2   20.40    5.00
   0  15  -2   24.90    3.90
   0  15   2   22.30    4.30
  -1 -15  -2   15.40    4.60
   1 -15   2   16.80    4.40
   1  15   2   23.60    4.40
  -1  15  -2   15.70    3.90
  -2 -15  -2   91.19    9.30
   2 -15   2   94.09    8.90
   2  15   2  112.29    9.00
  -2  15  -2   95.89    8.30
  -3 -15  -2    3.00    4.10
   3 -15   2    3.10    3.80
  -3  15  -2    0.60    3.30
   3  15   2   -1.90    3.50
  -4 -15  -2  245.78   15.50
   4 -15   2  234.18   15.30
   4  15   2  237.38   14.90
  -4  15  -2  240.38   14.70
   5 -15   2   -4.40    4.00
  -5 -15  -2    2.70    4.20
   5  15   2    2.00    3.60
  -5  15  -2    1.70    3.50
  -6 -15  -2   19.20    4.90
   6 -15   2   19.00    4.90
   6  15   2    8.60    4.10
  -6  15  -2   11.10    4.10
   7 -15   2   77.29    9.10
  -7 -15  -2   70.69    9.20
   7  15   2   87.79    8.70
  -7  15  -2   85.19    8.20
  -8 -15  -2   -2.60    4.30
   8 -15   2   -5.30    4.00
   8  15   2    0.40    4.00
  -8  15  -2    0.70    3.80
  -9 -15  -2   12.80    4.80
   9 -15   2   -1.30    4.40
   9  15   2   13.30    4.80
  -9  15  -2    8.60    4.10
  10 -15   2  126.19   11.40
 -10 -15  -2  122.79   10.80
 -10  15  -2  107.19   10.30
  10  15   2  122.89   10.70
 -11 -15  -2   21.60    5.80
  11 -15   2   26.20    6.10
 -11  15  -2   33.70    5.70
  11  15   2   30.60    5.60
  12 -15   2   75.09    8.60
 -12 -15  -2   68.39    8.00
  12  15   2   56.19    7.40
 -12  15  -2   68.89    7.80
  13 -15   2   97.09   11.20
 -13 -15  -2   83.39   10.50
 -13  15  -2   91.79   10.50
  13  15   2   96.69   10.60
  14 -15   2    2.60    5.60
 -14 -15  -2    7.20    5.40
 -14  15  -2    9.00    5.60
  14  15   2    2.20    5.40
  15 -15   2  124.89   12.90
 -15 -15  -2  125.99   12.90
  15  15   2  128.59   12.50
 -15  15  -2  110.89   12.50
  16 -15   2  123.59   13.80
 -16 -15  -2  120.99   12.60
 -16  15  -2  122.59   13.00
  16  15   2   97.69   12.20
  15 -16  -2   17.60    7.00
 -15 -16   2   12.20    6.10
  15  16  -2    7.40    5.80
 -15  16   2   36.50    7.40
 -14 -16   2   43.50    6.90
  14 -16  -2   56.69    8.40
  14  16  -2   37.60    6.50
 -14  16   2   58.99    8.10
 -13 -16   2    4.30    4.80
  13 -16  -2   13.50    6.60
 -13  16   2    3.70    6.00
  13  16  -2   21.20    5.30
 -12 -16   2   84.29    9.70
  12 -16  -2   75.79    9.10
 -12  16   2   81.79   10.50
  12  16  -2   65.59    8.90
  11 -16  -2   47.90    7.20
 -11 -16   2   43.20    6.30
 -11  16   2   49.00    7.00
  11  16  -2   36.80    5.70
  10 -16  -2   40.40    6.50
 -10 -16   2   19.50    4.90
 -10  16   2   21.00    5.70
  10  16  -2   21.10    4.80
   9 -16  -2  141.59   12.30
  -9 -16   2  125.59   11.00
  -9  16   2  131.89   11.40
   9  16  -2  131.29   10.50
  -8 -16   2   52.09    6.40
   8 -16  -2   49.10    7.30
  -8  16   2   67.19    8.70
   8  16  -2   66.99    7.60
  -7 -16   2    5.30    4.10
   7 -16  -2    2.80    5.00
  -7  16   2   10.00    4.50
   7  16  -2    8.10    3.80
  -6 -16   2  270.27   16.90
   6 -16  -2  264.87   17.60
  -6  16   2  274.07   17.00
   6  16  -2  278.37   16.30
   5 -16  -2   15.00    5.10
  -5 -16   2   21.60    4.70
   5  16  -2   17.20    4.00
  -5  16   2   23.90    4.90
   4 -16  -2   91.19   10.40
  -4 -16   2   88.49    8.90
   4  16  -2   95.99    8.50
  -4  16   2  116.59    9.60
   3 -16  -2  163.78   12.80
  -3 -16   2  173.68   12.30
   3  16  -2  170.08   11.50
  -3  16   2  176.78   12.30
   2 -16  -2  300.67   18.20
  -2 -16   2  286.67   17.40
  -2  16   2  274.77   17.10
   2  16  -2  288.77   16.80
  -1 -16   2   66.79    8.20
   1 -16  -2   70.99    8.80
   1  16  -2   60.39    7.30
  -1  16   2   73.29    8.00
   0 -16   2  548.65   29.80
   0 -16  -2  555.54   30.10
   0  16   2  542.65   29.40
   0  16  -2  534.85   29.10
  -1 -16  -2  179.38   13.30
   1 -16   2  191.98   13.20
   1  16   2  192.08   12.90
  -1  16  -2  187.58   12.40
   2 -16   2   26.10    5.10
  -2 -16  -2   35.00    5.60
   2  16   2   31.20    5.20
  -2  16  -2   31.50    4.90
   3 -16   2  232.38   15.10
  -3 -16  -2  225.98   15.20
   3  16   2  225.98   14.40
  -3  16  -2  219.18   14.10
  -4 -16  -2    2.70    4.40
   4 -16   2    7.30    4.10
   4  16   2    7.70    4.30
  -4  16  -2    0.60    3.70
   5 -16   2  284.67   17.80
  -5 -16  -2  283.47   17.70
  -5  16  -2  286.37   17.00
   5  16   2  276.67   17.10
  -6 -16  -2   68.79    9.10
   6 -16   2   54.49    7.00
   6  16   2   62.99    8.10
  -6  16  -2   70.39    8.10
   7 -16   2   37.30    6.00
  -7 -16  -2   44.00    6.60
   7  16   2   29.20    5.40
  -7  16  -2   44.10    5.70
   8 -16   2    9.60    4.80
  -8 -16  -2    2.70    4.50
  -8  16  -2    1.30    4.20
   8  16   2   -0.60    4.30
   9 -16   2    2.20    4.60
  -9 -16  -2   -3.20    4.50
  -9  16  -2    0.10    4.20
   9  16   2    1.80    4.40
 -10 -16  -2   -4.30    4.60
  10 -16   2   -7.40    4.70
  10  16   2    5.00    4.80
 -10  16  -2   -2.50    4.40
 -11 -16  -2   45.30    6.90
  11 -16   2   54.99    7.40
 -11  16  -2   67.39    8.80
  11  16   2   47.10    6.80
 -12 -16  -2   37.30    6.30
  12 -16   2   38.30    6.80
  12  16   2   20.40    6.10
 -12  16  -2   33.60    6.30
  13 -16   2  -15.10    5.50
 -13 -16  -2   -0.90    5.40
  13  16   2   10.50    5.60
 -13  16  -2    7.60    5.40
  14 -16   2   67.19    8.70
 -14 -16  -2   83.29   11.30
  14  16   2   73.39    8.80
 -14  16  -2   87.69   10.70
  15 -16   2   13.50    6.80
 -15 -16  -2   23.20    6.70
 -15  16  -2   20.10    6.60
  15  16   2   10.20    6.40
 -13 -17   2   51.19    7.40
  13 -17  -2   66.29    8.70
 -13  17   2   59.49    8.40
  13  17  -2   50.99    7.00
 -12 -17   2   16.70    5.30
  12 -17  -2   24.70    7.10
  12  17  -2    9.70    5.00
 -12  17   2   14.40    6.20
  11 -17  -2   54.89    7.80
 -11 -17   2   52.99    7.10
  11  17  -2   66.99    8.40
 -11  17   2   50.39    7.60
 -10 -17   2    7.10    4.70
  10 -17  -2    7.50    5.70
  10  17  -2    5.70    4.30
 -10  17   2    1.50    5.10
  -9 -17   2  216.58   15.30
   9 -17  -2  246.38   16.60
   9  17  -2  226.28   14.80
  -9  17   2  234.18   15.80
  -8 -17   2    5.00    4.50
   8 -17  -2   -7.40    5.20
  -8  17   2    4.30    4.80
   8  17  -2    6.20    4.10
   7 -17  -2   84.89   10.70
  -7 -17   2  101.39    9.70
   7  17  -2  108.19    9.20
  -7  17   2   95.89   10.10
  -6 -17   2   64.79    8.40
   6 -17  -2   67.79    8.00
  -6  17   2   70.89    9.00
   6  17  -2   65.09    7.60
  -5 -17   2  133.09   11.10
   5 -17  -2  151.98   12.30
  -5  17   2  143.09   11.30
   5  17  -2  138.09   10.60
   4 -17  -2   -5.10    4.80
  -4 -17   2    0.30    4.10
   4  17  -2   -6.60    3.40
  -4  17   2    3.60    4.40
   3 -17  -2  177.28   13.80
  -3 -17   2  200.58   13.30
  -3  17   2  193.18   13.40
   3  17  -2  182.58   12.50
  -2 -17   2   12.40    4.50
   2 -17  -2   14.30    5.10
  -2  17   2   18.70    4.80
   2  17  -2   11.10    3.90
   1 -17  -2   14.00    4.90
  -1 -17   2    5.30    4.20
  -1  17   2    5.80    4.20
   1  17  -2   11.60    3.90
   0 -17  -2    4.70    4.70
   0 -17   2   10.00    4.30
   0  17  -2    3.60    3.70
   0  17   2    8.10    4.30
  -1 -17  -2   15.50    5.20
   1 -17   2   14.20    4.90
  -1  17  -2   18.00    4.30
   1  17   2   11.50    4.50
   2 -17   2   14.10    4.80
  -2 -17  -2   16.10    5.10
   2  17   2   22.80    4.90
  -2  17  -2   21.80    4.50
   3 -17   2    8.10    4.50
  -3 -17  -2    0.30    4.40
   3  17   2    6.00    4.40
  -3  17  -2    2.10    3.90
  -4 -17  -2   87.19   10.30
   4 -17   2   92.09   10.10
   4  17   2  120.09    9.80
  -4  17  -2   98.59    9.00
  -5 -17  -2    2.00    4.30
   5 -17   2   -6.90    4.30
  -5  17  -2    0.50    4.10
   5  17   2    7.40    4.50
  -6 -17  -2   23.10    5.50
   6 -17   2   27.60    5.70
  -6  17  -2   16.80    4.80
   6  17   2   20.80    5.00
  -7 -17  -2   73.99    8.50
   7 -17   2   79.69    9.80
  -7  17  -2   80.49    8.70
   7  17   2   68.49    7.80
   8 -17   2    7.50    5.00
  -8 -17  -2   -7.30    4.60
   8  17   2   -3.40    4.50
  -8  17  -2    1.70    4.20
  -9 -17  -2   26.50    6.00
   9 -17   2   21.60    5.70
   9  17   2   17.90    5.30
  -9  17  -2   23.40    5.20
  10 -17   2   55.49    7.40
 -10 -17  -2   52.19    7.40
 -10  17  -2   58.89    7.30
  10  17   2   53.19    7.20
  11 -17   2   56.49    7.90
 -11 -17  -2   53.29    7.70
  11  17   2   59.09    7.60
 -11  17  -2   54.19    7.20
  12 -17   2   -0.60    5.90
 -12 -17  -2    7.10    5.80
  12  17   2   -6.40    5.30
 -12  17  -2   -1.10    5.40
 -13 -17  -2  101.69   11.60
  13 -17   2   77.49    9.50
 -13  17  -2   99.69   11.40
  13  17   2   76.49    9.10
  12 -18  -2    7.60    6.70
 -12 -18   2    4.10    5.60
  12  18  -2    5.90    5.40
 -12  18   2    2.50    6.20
 -11 -18   2   10.00    5.50
  11 -18  -2   13.20    6.30
  11  18  -2   11.20    4.90
 -11  18   2   14.00    6.40
 -10 -18   2   26.40    6.10
  10 -18  -2   43.40    7.20
  10  18  -2   36.00    5.90
 -10  18   2   39.70    6.60
   9 -18  -2    0.10    5.50
  -9 -18   2   14.70    5.30
   9  18  -2    8.70    4.40
  -9  18   2   11.80    5.40
   8 -18  -2   15.30    6.00
  -8 -18   2    9.00    4.90
  -8  18   2    5.70    5.10
   8  18  -2    4.40    4.30
  -7 -18   2   72.19    8.90
   7 -18  -2   91.09   10.70
  -7  18   2   56.09    7.50
   7  18  -2   63.29    8.10
   6 -18  -2   21.20    5.80
  -6 -18   2   27.90    5.30
  -6  18   2   22.00    5.60
   6  18  -2   28.10    5.20
   5 -18  -2    7.50    5.10
  -5 -18   2   -0.90    4.20
   5  18  -2   -4.50    3.80
  -5  18   2    1.40    4.70
   4 -18  -2  437.66   26.10
  -4 -18   2  451.95   25.40
   4  18  -2  423.36   24.60
  -4  18   2  462.15   25.40
   3 -18  -2   69.99    9.10
  -3 -18   2   49.90    6.50
   3  18  -2   50.09    6.00
  -3  18   2   41.30    6.30
   2 -18  -2  242.18   16.50
  -2 -18   2  236.08   15.80
   2  18  -2  222.08   14.90
  -2  18   2  251.57   15.70
   1 -18  -2  114.79   11.70
  -1 -18   2  131.99   11.10
  -1  18   2  135.79   11.10
   1  18  -2  138.79   10.40
   0 -18   2  200.58   14.10
   0 -18  -2  199.68   14.40
   0  18  -2  203.98   13.40
   0  18   2  183.08   13.60
  -1 -18  -2  106.49   11.00
   1 -18   2  121.99   10.80
   1  18   2  121.99   10.50
  -1  18  -2  124.49    9.90
  -2 -18  -2   47.60    6.90
   2 -18   2   48.30    6.70
   2  18   2   52.99    6.60
  -2  18  -2   47.60    6.20
  -3 -18  -2  336.47   21.30
   3 -18   2  349.47   21.10
  -3  18  -2  341.87   20.30
   3  18   2  356.06   20.70
  -4 -18  -2   84.99   10.10
   4 -18   2   95.59   10.20
   4  18   2   84.59    9.80
  -4  18  -2   76.49    8.80
   5 -18   2  397.96   24.10
  -5 -18  -2  408.76   24.20
  -5  18  -2  423.36   23.40
   5  18   2  390.26   23.70
   6 -18   2   49.30    7.20
  -6 -18  -2   56.89    7.40
  -6  18  -2   57.29    7.00
   6  18   2   48.80    6.90
   7 -18   2  245.18   17.90
  -7 -18  -2  280.47   17.90
  -7  18  -2  270.17   17.00
   7  18   2  263.97   17.30
  -8 -18  -2   31.50    6.30
   8 -18   2   26.60    6.20
   8  18   2   21.40    5.80
  -8  18  -2   19.80    5.30
  -9 -18  -2  262.07   17.70
   9 -18   2  258.77   17.90
   9  18   2  239.28   17.30
  -9  18  -2  265.97   17.10
 -10 -18  -2    2.00    5.60
  10 -18   2    3.30    5.20
 -10  18  -2   15.40    5.50
  10  18   2    5.50    5.40
 -11 -18  -2    7.10    5.90
  11 -18   2   32.20    6.80
 -11  18  -2   14.50    5.70
  11  18   2   18.80    6.10
 -12 -18  -2    7.40    6.00
  12 -18   2   12.50    6.50
  12  18   2    6.90    5.70
 -12  18  -2    0.20    5.80
  10 -19  -2    4.80    6.50
 -10 -19   2    0.00    5.30
  10  19  -2   -9.00    4.70
 -10  19   2    5.70    6.00
  -9 -19   2   45.60    7.00
   9 -19  -2   47.80    7.70
   9  19  -2   43.90    6.40
  -9  19   2   51.89    7.30
  -8 -19   2   -3.90    4.70
   8 -19  -2    7.70    6.10
   8  19  -2    3.20    4.40
  -8  19   2   -6.90    5.00
  -7 -19   2  221.38   16.00
   7 -19  -2  232.98   17.30
   7  19  -2  243.28   15.70
  -7  19   2  260.27   17.00
  -6 -19   2   -1.60    4.60
   6 -19  -2   -2.00    5.30
  -6  19   2    0.90    5.20
   6  19  -2   -9.10    4.10
   5 -19  -2  465.55   27.50
  -5 -19   2  474.55   26.90
   5  19  -2  458.65   26.10
  -5  19   2  467.85   26.70
  -4 -19   2    4.90    4.90
   4 -19  -2    1.50    5.40
   4  19  -2    8.80    4.40
  -4  19   2   -6.10    4.60
  -3 -19   2  138.19   11.90
   3 -19  -2  145.29   13.10
  -3  19   2  153.78   12.10
   3  19  -2  127.79   11.00
   2 -19  -2    1.80    5.30
  -2 -19   2   -1.30    4.40
   2  19  -2    2.40    4.00
  -2  19   2   -1.90    4.80
  -1 -19   2  141.29   11.50
   1 -19  -2  121.49   12.30
   1  19  -2  122.99   10.60
  -1  19   2  138.49   11.40
   0 -19   2   -7.10    4.70
   0 -19  -2    8.70    5.30
   0  19  -2   -7.00    3.90
   0  19   2    2.40    4.70
   1 -19   2   24.80    5.90
  -1 -19  -2   22.00    5.80
  -1  19  -2   23.00    5.00
   1  19   2   27.30    5.60
  -2 -19  -2   78.09   10.30
   2 -19   2   83.69   10.00
   2  19   2   72.09    9.80
  -2  19  -2   76.59    8.60
   3 -19   2   59.29    7.80
  -3 -19  -2   64.39    8.00
  -3  19  -2   65.69    7.20
   3  19   2   71.39    9.10
  -4 -19  -2  123.39   11.90
   4 -19   2  132.39   12.20
   4  19   2  126.29   11.40
  -4  19  -2  123.29   10.90
  -5 -19  -2   84.59   10.70
   5 -19   2   76.99   10.40
   5  19   2   62.99    7.60
  -5  19  -2   62.79    7.50
   6 -19   2    5.60    5.40
  -6 -19  -2   12.10    5.60
  -6  19  -2   -4.50    4.70
   6  19   2    4.50    5.30
  -7 -19  -2   35.80    6.90
   7 -19   2   32.10    7.00
  -7  19  -2   39.70    6.10
   7  19   2   35.80    6.50
  -8 -19  -2    8.70    5.80
   8 -19   2    5.80    5.80
  -8  19  -2    8.90    5.20
   8  19   2    8.70    5.30
  -9 -19  -2  184.68   14.80
   9 -19   2  164.78   14.00
  -9  19  -2  135.49   13.40
   9  19   2  162.18   13.60
 -10 -19  -2   -2.20    5.70
  10 -19   2   -3.90    6.00
 -10  19  -2   12.70    6.00
  10  19   2    2.00    5.60
   8 -20  -2   -3.90    6.20
  -8 -20   2   -3.20    5.40
  -8  20   2    7.30    5.90
   8  20  -2    2.60    5.30
   7 -20  -2   19.50    6.70
  -7 -20   2   11.10    5.60
  -7  20   2   12.60    5.80
   7  20  -2   14.60    5.40
   6 -20  -2   12.50    6.30
  -6 -20   2   14.60    5.80
  -6  20   2   14.00    5.90
   6  20  -2   17.00    5.30
   5 -20  -2   61.59    8.30
  -5 -20   2   61.19    7.70
  -5  20   2   66.59    8.00
   5  20  -2   53.69    7.20
   4 -20  -2   63.89    8.50
  -4 -20   2   65.19    8.00
  -4  20   2   67.49    8.10
   4  20  -2   74.89    9.10
   3 -20  -2   66.59    8.70
  -3 -20   2   58.89    7.60
  -3  20   2   65.09    7.90
   3  20  -2   60.59    7.40
  -2 -20   2   19.50    6.00
   2 -20  -2   21.80    6.20
  -2  20   2   20.90    5.80
   2  20  -2   21.60    5.10
   1 -20  -2    8.10    6.00
  -1 -20   2   21.60    5.80
  -1  20   2   25.00    5.80
   1  20  -2   19.80    5.20
   0 -20   2   -1.50    5.20
   0 -20  -2    7.40    6.00
   0  20   2   -1.10    4.80
   0  20  -2    4.40    4.40
  -1 -20  -2   97.09   12.00
   1 -20   2  127.09   11.70
   1  20   2  136.29   11.50
  -1  20  -2  120.69   10.80
  -2 -20  -2    6.40    5.50
   2 -20   2    9.20    5.70
  -2  20  -2   10.90    4.90
   2  20   2   15.50    5.50
   3 -20   2  381.36   23.70
  -3 -20  -2  367.16   23.50
   3  20   2  402.96   23.00
  -3  20  -2  373.96   22.50
  -4 -20  -2   -3.00    5.30
   4 -20   2   -1.10    5.40
   4  20   2    9.80    5.40
  -4  20  -2   -4.40    4.70
  -5 -20  -2  401.46   24.90
   5 -20   2  411.06   24.90
   5  20   2  416.16   24.50
  -5  20  -2  401.46   24.10
   6 -20   2   -6.20    5.50
  -6 -20  -2   -3.80    5.60
   6  20   2   10.80    5.50
  -6  20  -2    4.60    5.10
   7 -20   2  114.49   12.70
  -7 -20  -2  102.69   12.70
  -7  20  -2  120.49   11.60
   7  20   2  140.89   12.50
   8 -20   2   15.30    6.40
  -8 -20  -2   20.10    6.20
   8  20   2   14.00    6.30
  -8  20  -2   11.30    5.80
   5  21  -2  196.58   15.20
  -5  21   2  214.08   16.00
  -4 -21   2    2.70    5.80
   4 -21  -2    0.90    6.40
   4  21  -2    8.80    5.50
  -4  21   2   -2.50    5.80
  -3 -21   2   41.20    7.30
   3 -21  -2   47.90    8.00
   3  21  -2   46.40    6.80
  -3  21   2   52.99    7.80
   2 -21  -2   18.50    6.70
  -2 -21   2   38.00    6.80
  -2  21   2   37.20    6.80
   2  21  -2   32.40    6.20
   1 -21  -2   20.60    6.80
  -1 -21   2   18.60    6.40
  -1  21   2   16.80    6.30
   1  21  -2   16.80    5.50
   0 -21   2   68.49    9.10
   0 -21  -2   94.39   12.40
   0  21  -2   83.39   10.10
   0  21   2   95.19   11.20
   1 -21   2   10.20    5.90
  -1 -21  -2   10.20    6.40
   1  21   2   18.60    6.00
  -1  21  -2   18.00    5.70
  -2 -21  -2   11.70    5.90
   2 -21   2    5.20    5.90
   2  21   2    9.00    5.60
  -2  21  -2   15.40    5.50
  -3 -21  -2   -2.10    6.10
   3 -21   2   -3.70    5.70
   3  21   2    6.80    5.80
  -3  21  -2    7.20    5.30
   4 -21   2   44.10    7.50
  -4 -21  -2   49.10    7.80
  -4  21  -2   33.00    6.70
   4  21   2   42.00    7.00
   5  21   2    7.70    5.90
 -22   0   3    0.10    5.50
  22   0  -3    1.50    6.30
 -21   0   3  213.28   15.70
  21   0  -3  206.88   16.20
 -20   0   3    3.30    4.90
  20   0  -3    4.20    5.60
 -19   0   3  237.88   16.50
  19   0  -3  248.48   16.50
  18   0  -3   -5.80    4.40
 -18   0   3    4.50    4.50
 -17   0   3   71.49    8.60
  17   0  -3   60.99    7.30
 -16   0   3    3.20    4.00
  16   0  -3    4.80    4.40
  15   0  -3  349.07   21.70
 -15   0   3  372.16   22.50
 -14   0   3   -0.90    3.20
  14   0  -3   -5.20    3.30
 -13   0   3  765.92   39.50
  13   0  -3  761.12   39.50
 -12   0   3   -4.30    2.40
  12   0  -3   -0.10    2.70
  11   0  -3   35.20    4.30
 -11   0   3   39.90    5.00
  10   0  -3   -2.20    2.20
 -10   0   3    1.10    2.30
  -9   0   3  171.08   10.10
   9   0  -3  171.08   10.10
  -8   0   3    1.10    2.00
   8   0  -3    2.60    2.10
   7   0  -3  466.95   23.60
  -7   0   3  451.15   23.50
  -6   0   3    0.00    1.30
   6   0  -3    0.40    1.40
  -5   0   3 5581.94  273.47
   4   0  -3    0.60    1.10
  -4   0   3   -0.80    1.10
  -3   0   3  624.34   31.60
   3   0  -3  653.93   31.70
  -2   0   3   -0.40    1.10
   2   0  -3    0.00    1.20
  -2   0   3   -0.60    1.10
   2   0  -3    0.60    1.10
   1   0  -3  372.66   19.20
  -1   0   3  391.06   19.20
  -1   0   3  386.16   19.20
   0   0   3   -2.10    1.20
   0   0   3   -1.00    1.10
   0   0  -3   -0.60    0.90
   1   0   3 2020.90  100.19
  -1   0  -3 1974.60  100.09
   1   0   3 2101.59  100.19
   2   0   3    2.20    1.60
  -2   0  -3    0.60    1.50
   2   0   3    0.10    1.50
   3   0   3  544.55   28.10
  -3   0  -3  546.35   28.10
   3   0   3  552.14   28.30
  -3   0  -3  559.64   28.30
   4   0   3    1.30    1.70
  -4   0  -3    0.10    1.50
  -5   0  -3 3183.98  158.18
   5   0   3 3253.57  158.28
   6   0   3   -0.80    1.80
   6   0   3   -2.00    2.10
  -6   0  -3    1.00    1.70
  -6   0  -3   -1.20    2.60
   7   0   3   39.00    4.60
  -7   0  -3   43.10    4.40
  -7   0  -3   46.90    4.70
   7   0   3   48.90    4.70
   8   0   3   -0.90    2.60
   8   0   3   -1.10    2.60
  -8   0  -3   -3.00    2.30
  -8   0  -3    0.20    2.70
  -9   0  -3   83.39    6.60
  -9   0  -3   82.59    6.40
   9   0   3   76.99    6.80
   9   0   3   73.89    6.90
  10   0   3    1.20    3.00
  10   0   3   -2.00    2.70
 -10   0  -3   -0.40    2.60
 -10   0  -3    2.70    2.70
  11   0   3  144.09    9.70
 -11   0  -3  144.79    9.60
 -11   0  -3  126.49    9.10
  11   0   3  152.88    9.80
 -12   0  -3   -2.70    2.80
  12   0   3   -2.90    3.10
 -12   0  -3   -0.40    2.80
  12   0   3    3.90    3.00
  13   0   3   27.60    4.40
  13   0   3   24.80    4.30
 -13   0  -3   29.90    4.40
 -13   0  -3   27.40    4.00
  14   0   3   -0.70    3.30
 -14   0  -3    3.80    3.30
  14   0   3    2.80    3.90
 -14   0  -3   -3.40    3.20
  15   0   3  527.75   28.10
 -15   0  -3  497.45   28.00
  15   0   3  498.15   27.50
 -15   0  -3  514.85   27.50
  16   0   3    5.00    4.80
 -16   0  -3    6.70    4.50
 -16   0  -3   -7.30    3.80
  16   0   3    3.80    4.10
  17   0   3  629.24   33.00
  17   0   3  611.14   33.80
 -17   0  -3  604.34   33.00
 -17   0  -3  608.44   33.80
 -18   0  -3    0.60    5.00
 -18   0  -3   -4.40    6.40
  19   0   3   20.10    6.60
 -19   0  -3   12.40    6.10
  20   0   3    3.30    6.50
 -20   0  -3  -14.50    5.40
 -21   0  -3   -4.10    6.20
  21   0   3    0.40    6.70
 -22   0  -3   -4.20    6.60
  22   0   3   12.50    7.40
 -22  -1   3   55.49    8.30
  22  -1  -3   61.09    8.70
 -22   1   3   48.70    7.70
  22   1  -3   46.40    8.30
 -21  -1   3    5.60    5.40
  21  -1  -3    2.00    6.50
 -21   1   3    3.40    5.40
  21   1  -3   -5.30    5.60
 -20  -1   3  230.98   16.70
  20  -1  -3  252.17   17.30
 -20   1   3  247.18   16.80
  20   1  -3  235.38   16.80
  19  -1  -3   78.99   10.00
 -19  -1   3   75.49    9.30
  19   1  -3   51.89    7.60
 -19   1   3   74.09    9.20
 -18  -1   3    2.80    4.50
  18  -1  -3   -0.10    4.90
 -18   1   3    3.00    4.30
  18   1  -3   -8.50    4.40
 -17  -1   3  105.79   10.40
  17  -1  -3  130.69   10.70
 -17   1   3  107.19   10.20
  17   1  -3  115.29   10.30
  16  -1  -3    6.70    4.60
 -16  -1   3    5.40    4.20
  16   1  -3    7.20    4.20
 -16   1   3   12.50    4.50
  15  -1  -3   14.90    5.30
 -15  -1   3   23.60    4.60
 -15   1   3   19.80    4.60
  15   1  -3   20.40    4.60
 -14  -1   3   -0.60    3.20
  14  -1  -3   -3.50    3.50
  14   1  -3    3.00    3.60
 -13  -1   3  523.15   27.10
  13  -1  -3  509.55   27.20
 -13   1   3  503.65   27.10
  13   1  -3  499.05   27.10
 -12  -1   3   90.69    7.30
  12  -1  -3   95.99    7.70
 -12   1   3   99.59    7.50
  12   1  -3   97.59    7.70
 -11  -1   3 1351.26   66.79
  11  -1  -3 1281.37   66.79
 -11   1   3 1342.57   66.79
  11   1  -3 1357.16   66.79
  10  -1  -3   81.49    6.70
 -10  -1   3   88.89    6.50
  10   1  -3   90.79    6.80
 -10   1   3   90.79    6.60
   9  -1  -3   39.30    4.60
  -9  -1   3   39.70    4.50
  -9   1   3   39.30    4.60
   9   1  -3   34.70    4.50
   8  -1  -3  127.29    7.90
  -8  -1   3  119.49    7.60
  -8   1   3  123.89    7.80
   8   1  -3  126.09    7.70
  -7  -1   3  283.87   15.00
   7  -1  -3  292.57   15.20
  -7   1   3  287.67   15.20
   7   1  -3  285.37   15.00
   6  -1  -3    7.30    1.70
  -6  -1   3    7.00    1.50
   6   1  -3    7.20    1.60
  -6   1   3    7.00    1.70
  -5  -1   3   29.10    2.50
   5  -1  -3   28.90    2.90
   5   1  -3   32.20    2.60
   4  -1  -3  206.98   10.80
  -4   1   3  203.58   10.70
   4   1  -3  205.78   10.50
  -3  -1   3 1194.38   59.49
   3  -1  -3 1219.68   59.79
  -3   1   3 1216.38   59.69
   3   1  -3 1217.18   59.49
  -2  -1   3 1982.50   96.69
  -2  -1   3 1927.01   96.69
   2   1  -3 1938.11   96.69
   2   1  -3 2023.50   96.79
  -2   1   3 1981.10   97.19
  -2   1   3 1973.60   97.19
   1  -1  -3  159.08    8.60
  -1  -1   3  163.58    8.10
  -1  -1   3  161.18    8.10
   1   1  -3  159.98    8.40
   1   1  -3  155.88    8.10
  -1   1   3  163.18    8.70
  -1   1   3  159.78    8.70
   0  -1   3  160.98    8.10
   0  -1   3  159.88    8.10
   0  -1  -3  149.49    8.40
   0   1  -3  153.98    8.00
   0   1   3  151.28    8.80
   0   1   3  157.48    8.50
  -1  -1  -3   75.59    4.90
   1  -1   3   74.69    4.60
   1  -1   3   70.59    5.00
  -1   1  -3   71.99    4.50
   1   1   3   76.49    5.10
   1   1   3   76.59    5.10
   2  -1   3  173.58    9.30
   2  -1   3  165.68    9.40
  -2  -1  -3  164.68    9.40
  -2  -1  -3  173.88    9.70
   2   1   3  164.88    9.50
   2   1   3  151.08    9.50
  -2   1  -3  163.28    9.20
   3  -1   3 2542.35  124.89
  -3   1  -3 2536.55  124.79
   4  -1   3  998.10   49.99
  -4   1  -3 1014.60   49.90
   5  -1   3   58.49    4.60
  -5   1  -3   61.19    4.30
  -6  -1  -3  837.42   43.50
  -6  -1  -3  881.71   43.40
   6  -1   3  893.01   43.50
   6   1   3  854.01   43.50
  -6   1  -3  890.11   43.40
   6   1   3  847.62   43.60
  -7  -1  -3 1207.68   61.29
  -7  -1  -3 1260.87   61.19
   7  -1   3 1196.68   61.29
   7  -1   3 1227.68   61.19
   7   1   3 1211.68   61.29
  -7   1  -3 1234.78   61.09
   7   1   3 1252.67   61.29
  -7   1  -3 1231.28   61.29
   8  -1   3  406.66   21.30
  -8  -1  -3  413.46   21.40
   8  -1   3  384.16   21.20
  -8  -1  -3  405.76   21.10
  -8   1  -3  396.26   21.20
  -8   1  -3  406.76   21.10
   8   1   3  414.66   21.30
   8   1   3  382.96   21.20
   9  -1   3 1212.88   61.59
  -9  -1  -3 1190.58   61.59
  -9  -1  -3 1259.87   61.39
   9  -1   3 1204.68   61.49
  -9   1  -3 1248.08   61.39
  -9   1  -3 1251.47   61.59
   9   1   3 1244.98   61.49
   9   1   3 1198.78   61.49
 -10  -1  -3   28.80    3.80
 -10  -1  -3   26.10    3.80
  10  -1   3   26.80    3.80
  10  -1   3   29.80    3.90
  10   1   3   31.00    4.10
 -10   1  -3   25.90    3.50
  10   1   3   22.60    3.80
 -10   1  -3   26.40    3.80
 -11  -1  -3  974.30   50.49
 -11  -1  -3 1053.29   50.29
  11  -1   3 1009.00   50.39
  11  -1   3  967.00   50.39
  11   1   3  981.80   50.29
 -11   1  -3  971.00   50.39
  11   1   3 1008.00   50.49
 -11   1  -3  982.10   50.19
 -12  -1  -3  398.56   21.70
  12  -1   3  401.36   21.90
 -12  -1  -3  394.06   22.00
  12  -1   3  401.86   21.90
 -12   1  -3  387.96   21.90
 -12   1  -3  408.06   21.70
  12   1   3  408.86   22.00
  12   1   3  411.66   21.90
  13  -1   3  317.87   18.30
 -13  -1  -3  316.87   18.40
  13  -1   3  311.17   18.10
 -13  -1  -3  322.57   18.00
  13   1   3  318.17   18.10
 -13   1  -3  325.27   18.30
 -13   1  -3  315.07   17.90
  13   1   3  326.47   18.30
  14  -1   3  329.77   19.00
 -14  -1  -3  310.17   18.80
 -14  -1  -3  327.47   19.30
  14  -1   3  324.97   19.00
  14   1   3  343.87   19.30
 -14   1  -3  343.67   18.70
  14   1   3  343.07   19.10
 -14   1  -3  321.47   19.10
 -15  -1  -3  376.86   20.60
  15  -1   3  346.27   21.00
  15  -1   3  386.56   20.80
 -15  -1  -3  353.46   21.20
  15   1   3  333.47   21.00
 -15   1  -3  353.56   20.40
 -15   1  -3  363.76   21.00
  15   1   3  378.36   20.70
  16  -1   3   83.49    8.90
 -16  -1  -3   87.19    9.60
 -16  -1  -3  100.19    9.20
  16  -1   3   77.49    9.60
 -16   1  -3   76.19    9.30
  16   1   3   88.89    9.70
  16   1   3   82.89    9.00
 -16   1  -3   81.49    8.90
 -17  -1  -3    8.70    4.90
  17  -1   3    7.40    5.40
  17  -1   3   -6.00    4.30
 -17  -1  -3    1.10    4.90
  17   1   3   12.00    5.60
  17   1   3    5.60    4.80
 -17   1  -3   12.20    4.60
 -17   1  -3    8.00    4.80
  18  -1   3   15.00    4.70
  18  -1   3    5.30    5.90
 -18  -1  -3   14.90    6.10
 -18   1  -3    5.80    5.00
 -18   1  -3   11.00    5.40
  18   1   3    9.00    5.80
  19  -1   3   64.49    8.70
 -19  -1  -3   64.89    8.20
 -19   1  -3   64.49    8.30
  19   1   3   68.79    8.50
 -20  -1  -3   72.79    8.80
  20  -1   3   56.99    8.60
  20   1   3   71.79    9.10
 -20   1  -3   74.79    9.30
  21  -1   3   18.30    7.50
 -21  -1  -3   13.40    6.40
  21   1   3   20.80    7.40
 -21   1  -3   12.50    6.50
 -22  -1  -3    3.50    6.70
  22  -1   3   17.70    7.80
 -22   1  -3  -13.90    6.50
  22   1   3    9.60    7.90
 -22  -2   3   82.59    9.40
  22  -2  -3  105.99   13.00
  22   2  -3   69.19    9.40
 -22   2   3   89.19   11.90
  21  -2  -3    5.70    6.30
 -21  -2   3   19.80    6.10
  21   2  -3   21.60    6.50
 -21   2   3   16.40    5.90
  20  -2  -3   25.90    6.60
 -20  -2   3   14.50    5.40
  20   2  -3    6.90    5.80
 -20   2   3   19.20    5.70
 -19  -2   3   19.20    5.50
  19  -2  -3   21.40    6.20
 -19   2   3   42.10    6.20
  19   2  -3   38.40    6.30
  18  -2  -3   37.40    6.20
 -18  -2   3   25.50    5.50
 -18   2   3   31.70    5.70
  18   2  -3   36.40    5.80
  17  -2  -3  142.19   12.10
 -17  -2   3  144.49   11.70
  17   2  -3  164.88   12.10
 -17   2   3  156.88   11.90
  16  -2  -3  168.98   12.50
 -16  -2   3  165.18   12.10
 -16   2   3  167.58   12.40
  16   2  -3  171.08   12.20
 -15  -2   3  102.29    9.10
  15  -2  -3  109.49    9.60
 -15   2   3   94.49    9.30
  15   2  -3  109.69    9.40
  14  -2  -3   21.90    4.50
 -14  -2   3   14.00    4.10
  14   2  -3   16.20    4.90
 -14   2   3   19.80    4.10
 -13  -2   3  394.96   21.40
  13  -2  -3  391.16   21.70
  13   2  -3  377.46   21.40
 -13   2   3  399.66   21.50
  12  -2  -3   83.89    7.00
 -12  -2   3   78.89    6.70
  12   2  -3   77.49    6.70
 -12   2   3   76.39    6.70
 -11  -2   3  212.98   12.70
  11  -2  -3  216.68   13.00
 -11   2   3  226.78   12.90
  11   2  -3  223.58   12.80
 -10  -2   3  317.77   17.00
  10  -2  -3  311.57   17.20
 -10   2   3  317.97   17.10
  10   2  -3  309.47   17.00
  -9  -2   3  181.28   10.30
   9  -2  -3  178.28   10.60
   9   2  -3  174.28   10.30
  -9   2   3  172.28   10.40
   8  -2  -3    9.80    2.70
  -8  -2   3   12.50    2.40
   8   2  -3   10.90    2.50
  -8   2   3   13.20    2.60
   7  -2  -3  438.76   22.70
  -7  -2   3  437.46   22.40
  -7   2   3  444.46   22.70
   7   2  -3  438.16   22.40
   6  -2  -3    8.10    1.90
  -6  -2   3    4.90    1.40
  -6   2   3    6.90    1.70
   6   2  -3    2.70    1.40
   5  -2  -3   26.20    2.80
  -5  -2   3   23.50    2.20
   5   2  -3   22.40    2.30
  -5   2   3   17.50    2.20
   4  -2  -3  229.18   11.70
  -4  -2   3  220.18   11.20
   4   2  -3  217.28   11.20
  -4   2   3  222.38   11.70
   3  -2  -3 1104.69   54.39
  -3   2   3 1093.69   54.39
   2  -2  -3 3390.56  160.88
  -2   2   3 3164.48  161.08
   1  -2  -3   37.40    3.60
   1  -2  -3   39.20    4.40
  -1   2   3   40.90    3.80
  -1   2   3   38.90    3.70
   0  -2  -3  216.68   11.90
   0  -2   3  218.78   11.00
   0  -2  -3  216.68   11.70
   0  -2   3  218.58   11.10
   0   2   3  218.28   11.80
   0   2   3  211.98   11.70
   0   2  -3  218.48   11.10
   0   2  -3  214.18   11.00
   1  -2   3  351.86   17.60
  -1   2  -3  349.87   17.60
   2  -2   3    8.00    1.50
  -2   2  -3    6.80    1.30
   3  -2   3 2915.01  143.29
  -3   2  -3 2918.81  143.19
   4  -2   3 1129.69   55.99
  -4   2  -3 1126.69   55.79
  -5  -2  -3  149.29    8.70
   5  -2   3  149.29    8.60
  -5   2  -3  146.19    8.30
   5   2   3  153.18    8.80
  -6  -2  -3  496.35   26.30
   6  -2   3  530.95   26.30
  -6   2  -3  508.25   26.00
   6   2   3  514.45   26.20
  -7  -2  -3   87.19    6.30
   7  -2   3   77.49    7.30
   7  -2   3   79.59    6.20
   7   2   3   82.29    6.20
  -7   2  -3   81.69    5.80
   8  -2   3   65.29    6.20
  -8  -2  -3   68.09    6.30
  -8  -2  -3   73.59    6.40
   8  -2   3   71.29    6.20
  -8   2  -3   67.59    5.80
   8   2   3   69.29    7.80
   8   2   3   64.89    5.90
  -8   2  -3   67.29    6.10
   9  -2   3  207.98   12.60
   9  -2   3  210.78   12.60
  -9  -2  -3  210.78   12.70
  -9  -2  -3  214.28   12.50
  -9   2  -3  219.58   12.60
   9   2   3  217.88   12.90
   9   2   3  213.48   12.50
  -9   2  -3  218.38   12.30
 -10  -2  -3   14.40    3.40
  10  -2   3   19.50    3.50
  10  -2   3   12.60    3.30
 -10  -2  -3   21.40    3.60
  10   2   3   18.30    3.40
 -10   2  -3   13.70    3.00
  10   2   3   23.30    3.90
 -10   2  -3   16.40    3.20
  11  -2   3    5.60    2.90
  11  -2   3   -2.00    2.90
 -11  -2  -3    7.60    3.10
 -11  -2  -3    6.60    3.00
  11   2   3    1.20    2.90
  11   2   3    7.20    3.40
 -11   2  -3    1.30    2.60
 -11   2  -3    5.40    2.70
  12  -2   3   47.80    6.20
 -12  -2  -3   45.00    6.20
 -12  -2  -3   47.50    6.10
  12  -2   3   49.90    6.00
  12   2   3   50.39    6.40
 -12   2  -3   41.40    5.60
 -12   2  -3   56.99    6.10
  12   2   3   48.10    6.30
  13  -2   3   34.60    4.90
 -13  -2  -3   37.20    4.60
  13  -2   3   31.60    4.50
 -13  -2  -3   35.40    5.00
 -13   2  -3   37.10    4.90
  13   2   3   35.30    4.90
 -13   2  -3   30.70    4.30
  13   2   3   35.10    5.00
  14  -2   3   -4.30    3.20
  14  -2   3    4.00    3.70
 -14  -2  -3    7.40    3.80
 -14  -2  -3   -2.30    3.50
 -14   2  -3    4.90    3.40
  14   2   3   -0.60    3.70
  14   2   3    2.50    3.90
 -14   2  -3    5.70    3.60
 -15  -2  -3    2.10    4.30
  15  -2   3   -0.10    3.60
  15  -2   3    5.10    4.10
 -15  -2  -3   10.90    4.40
  15   2   3   11.50    4.20
 -15   2  -3    5.00    4.00
  15   2   3    5.50    4.30
 -15   2  -3    0.20    3.80
  16  -2   3   80.79    9.20
 -16  -2  -3  102.69   10.40
 -16  -2  -3  103.09   10.10
  16  -2   3  100.89   10.20
 -16   2  -3   90.39    9.40
 -16   2  -3   99.19    9.20
  16   2   3  110.49    9.60
  16   2   3   88.39    9.80
  17  -2   3  630.34   34.30
 -17  -2  -3  556.54   39.70
  17  -2   3  661.13   34.90
 -17  -2  -3  659.83   34.50
 -17   2  -3  652.63   34.80
 -17   2  -3  624.14   34.00
  17   2   3  655.73   34.10
 -18  -2  -3   17.70    5.60
  18  -2   3   13.90    5.10
  18  -2   3   17.40    6.50
  18   2   3   16.80    6.20
 -18   2  -3   20.80    5.80
 -18   2  -3   20.20    5.40
  19  -2   3  360.96   30.40
 -19  -2  -3  411.16   24.80
  19   2   3  435.66   24.90
 -19   2  -3  385.56   29.10
  20  -2   3    1.50    6.80
 -20  -2  -3    5.80    5.90
  20   2   3   12.10    6.50
 -20   2  -3    2.70    5.60
  21  -2   3  176.88   16.50
 -21  -2  -3  178.78   15.40
  21   2   3  196.78   16.30
 -21   2  -3  178.38   15.60
 -22  -2  -3   15.60    7.40
  22  -2   3   23.10    8.50
  22   2   3   23.20    8.10
 -22   2  -3   16.00    7.40
  22  -3  -3  160.08   15.20
 -22  -3   3  141.59   14.20
 -22   3   3  191.18   14.70
  22   3  -3  160.18   14.80
  21  -3  -3   10.90    6.70
 -21  -3   3    8.30    5.70
 -21   3   3    7.90    6.10
  21   3  -3   23.10    6.40
  20  -3  -3  331.97   21.50
 -20  -3   3  336.77   21.20
  20   3  -3  319.17   21.20
 -20   3   3  350.06   21.00
 -19  -3   3   26.40    5.70
  19  -3  -3   31.00    6.40
  19   3  -3   26.80    6.20
 -19   3   3   22.30    5.90
  18  -3  -3  542.55   30.10
 -18  -3   3  509.85   29.60
  18   3  -3  536.85   29.80
 -18   3   3  548.95   29.90
  17  -3  -3   74.59    9.50
 -17  -3   3   69.69    8.50
  17   3  -3   84.29    9.00
 -17   3   3   78.79    9.10
 -16  -3   3   31.80    5.30
  16  -3  -3   33.30    6.00
 -16   3   3   26.50    6.70
  16   3  -3   30.10    5.40
 -15  -3   3   80.69    8.20
  15  -3  -3   93.39    8.90
 -15   3   3   86.79    8.50
  15   3  -3   59.59    8.40
  14  -3  -3   34.70    5.30
 -14  -3   3   34.90    6.40
 -14   3   3   34.90    4.90
  14   3  -3   23.80    5.40
 -13  -3   3   50.19    6.20
  13  -3  -3   57.69    6.80
  13   3  -3   51.89    6.50
 -13   3   3   55.89    6.40
 -12  -3   3  295.47   16.40
  12  -3  -3  289.97   16.80
 -12   3   3  303.77   16.70
  12   3  -3  285.37   16.50
 -11  -3   3  415.56   21.70
  11  -3  -3  407.56   21.90
 -11   3   3  404.86   21.80
  11   3  -3  399.46   21.60
  10  -3  -3  261.07   14.80
 -10  -3   3  258.47   14.50
 -10   3   3  259.37   14.70
  10   3  -3  272.07   14.60
   9  -3  -3  623.24   31.90
  -9  -3   3  618.14   31.60
  -9   3   3  609.84   31.80
   9   3  -3  628.54   31.60
   8  -3  -3  240.28   13.80
  -8  -3   3  242.78   13.40
  -8   3   3  256.77   13.80
   8   3  -3  253.17   13.50
   7  -3  -3  478.95   25.00
  -7  -3   3  484.45   24.60
   7   3  -3  483.35   24.60
  -7   3   3  489.25   24.90
  -6  -3   3  234.68   12.10
   6   3  -3  231.38   12.10
  -6   3   3  230.38   12.50
   5  -3  -3  858.61   42.30
  -5  -3   3  851.51   41.80
  -5   3   3  839.92   42.20
   5   3  -3  832.12   41.80
  -4  -3   3  399.06   20.00
   4  -3  -3  412.56   20.60
  -4   3   3  399.96   20.50
   4   3  -3  400.06   20.00
   3  -3  -3  532.15   27.00
  -3   3   3  541.85   27.00
   2  -3  -3  157.28    8.50
  -2   3   3  148.79    8.50
  -1  -3   3  939.11   47.40
   1  -3  -3  977.30   48.40
   1  -3  -3  966.20   48.30
  -1  -3   3  961.60   47.50
   1   3  -3  971.30   47.40
   1   3  -3  962.00   47.40
  -1   3   3  970.60   48.40
  -1   3   3  970.70   48.30
   0  -3   3 2949.41  141.39
   0   3  -3 2825.62  141.29
   1  -3   3 7118.39  348.37
   2  -3   3   24.70    2.50
  -2   3  -3   25.00    2.20
   3  -3   3   12.40    1.80
  -3   3  -3   13.60    1.60
   4  -3   3   27.90    3.20
  -4  -3  -3   34.00    3.70
   4   3   3   26.40    3.40
  -4   3  -3   29.60    2.80
  -5  -3  -3  581.54   29.60
   5  -3   3  577.84   29.50
   5   3   3  571.74   29.50
  -5   3  -3  591.94   29.30
   6  -3   3  537.05   27.70
  -6  -3  -3  546.65   27.80
   6   3   3  543.05   27.70
  -6   3  -3  542.55   27.50
   7  -3   3  194.88   11.50
  -7  -3  -3  203.48   11.70
  -7   3  -3  199.48   11.30
   7   3   3  204.48   11.60
   8  -3   3  515.05   26.40
  -8  -3  -3  490.45   26.30
   8  -3   3  502.05   26.20
  -8   3  -3  515.35   26.00
   8   3   3  479.95   26.20
  -8   3  -3  519.05   26.30
   9  -3   3  187.58   11.60
  -9  -3  -3  197.18   11.90
   9  -3   3  183.58   11.70
   9   3   3  191.78   11.70
  -9   3  -3  203.68   11.70
  -9   3  -3  202.18   11.30
 -10  -3  -3  129.69    9.20
  10  -3   3  128.39    8.90
  10  -3   3  130.79    8.70
 -10   3  -3  131.19    8.60
  10   3   3  123.59    8.90
 -10   3  -3  130.79    8.70
  11  -3   3  166.38   10.80
 -11  -3  -3  166.88   11.00
 -11  -3  -3  166.58   13.10
  11  -3   3  160.48   10.70
 -11   3  -3  174.08   10.60
  11   3   3  179.88   11.00
 -11   3  -3  164.08   10.60
 -12  -3  -3   13.60    4.30
  12  -3   3   14.10    3.50
  12  -3   3   15.60    3.50
 -12  -3  -3   10.50    3.60
  12   3   3   10.90    3.70
  12   3   3   18.10    5.70
 -12   3  -3   16.20    3.40
 -12   3  -3   14.00    3.30
 -13  -3  -3   18.90    4.50
 -13  -3  -3   23.00    4.30
  13  -3   3   15.40    3.90
  13  -3   3   17.40    3.70
  13   3   3   11.80    4.10
  13   3   3   22.80    5.80
 -13   3  -3   16.10    3.60
 -13   3  -3   15.70    3.80
 -14  -3  -3    6.00    4.50
  14  -3   3    1.60    3.50
  14  -3   3   -2.90    3.60
 -14  -3  -3   -1.90    3.70
 -14   3  -3    1.30    3.50
  14   3   3   -2.20    4.40
  14   3   3    0.30    4.00
 -14   3  -3    2.30    3.50
 -15  -3  -3  139.89   11.30
 -15  -3  -3  125.09   10.90
  15  -3   3  130.09   10.20
  15  -3   3  115.79   10.60
 -15   3  -3  121.89   10.00
  15   3   3  115.09   10.80
  15   3   3  134.59   11.40
 -15   3  -3  128.19   10.30
  16  -3   3   47.90    6.10
 -16  -3  -3   40.30    6.80
  16  -3   3   29.70    5.90
 -16  -3  -3   43.50    6.50
  16   3   3   31.80    6.60
 -16   3  -3   38.50    5.70
 -16   3  -3   47.00    6.30
  16   3   3   32.40    6.40
  17  -3   3  199.58   15.10
  17  -3   3  209.78   14.40
 -17  -3  -3  246.68   16.60
 -17  -3  -3  214.68   15.50
 -17   3  -3  195.08   14.30
  17   3   3  210.78   15.60
 -17   3  -3  227.98   15.00
  18  -3   3   84.59    9.80
 -18  -3  -3   61.79    8.30
  18  -3   3   76.89    8.80
  18   3   3   71.29    8.60
 -18   3  -3   76.69    9.80
 -18   3  -3   91.29   10.50
 -19  -3  -3   -0.60    5.60
  19  -3   3    9.70    6.60
 -19   3  -3   22.70    6.30
 -19   3  -3   10.20    6.00
  19   3   3    9.20    6.40
  20  -3   3   18.40    7.30
 -20  -3  -3   17.50    6.50
 -20   3  -3   31.60    6.80
  20   3   3    8.20    6.70
  21  -3   3   -2.20    7.40
 -21  -3  -3   10.40    6.70
 -21   3  -3    4.10    6.20
  21   3   3    4.20    6.90
  22  -3   3   -2.60    7.70
 -22  -3  -3    2.10    6.90
 -22   3  -3   12.50    7.00
  22   3   3   -2.10    7.40
 -22  -4   3  174.58   15.60
  22  -4  -3  180.58   16.10
 -22   4   3  168.08   15.50
  22   4  -3  191.18   16.20
  21  -4  -3   -0.60    6.40
 -21  -4   3   19.10    6.10
  21   4  -3    2.70    6.00
 -21   4   3   16.20    5.80
 -20  -4   3   59.19    8.20
  20  -4  -3   67.49    8.70
  20   4  -3   85.69   11.10
 -20   4   3   98.19   10.80
  19  -4  -3    1.50    5.70
 -19  -4   3    2.90    4.80
 -19   4   3    0.70    4.90
  19   4  -3    0.80    4.90
 -18  -4   3   73.99    9.00
  18  -4  -3   58.09    7.70
 -18   4   3   47.10    6.80
  18   4  -3   52.69    7.00
 -17  -4   3  214.58   14.40
  17  -4  -3  204.28   14.90
 -17   4   3  211.68   14.60
  17   4  -3  194.88   14.30
 -16  -4   3   21.80    5.10
  16   4  -3   24.80    5.00
  15  -4  -3  742.03   40.20
 -15  -4   3  767.72   39.90
 -15   4   3  780.72   40.10
  15   4  -3  757.72   40.00
  14  -4  -3   54.79    6.30
 -14  -4   3   63.69    7.20
  14   4  -3   61.29    7.00
 -14   4   3   57.09    7.30
  13  -4  -3  601.74   31.50
 -13  -4   3  592.64   31.30
 -13   4   3  595.34   31.40
  13   4  -3  583.24   31.40
  12  -4  -3   10.40    3.60
 -12  -4   3    6.70    3.10
 -12   4   3    5.60    3.10
  12   4  -3    8.30    3.20
  11  -4  -3  125.09    8.70
 -11  -4   3  119.79    8.30
 -11   4   3  126.79    8.60
  11   4  -3  120.89    8.40
  10  -4  -3  736.03   38.30
 -10  -4   3  756.82   37.90
 -10   4   3  739.23   38.10
  10   4  -3  742.83   37.80
  -9  -4   3  488.55   24.90
   9  -4  -3  469.35   25.30
  -9   4   3  489.85   25.30
   9   4  -3  478.35   24.90
   8  -4  -3  587.24   30.10
  -8  -4   3  588.04   29.60
  -8   4   3  576.54   30.00
   8   4  -3  582.74   29.60
   7  -4  -3  701.93   35.90
  -7  -4   3  712.93   35.40
   7   4  -3  712.83   35.40
  -7   4   3  696.03   35.80
  -6  -4   3  891.31   44.60
  -6   4   3  898.81   45.00
   6   4  -3  904.91   44.60
  -5  -4   3  589.44   30.10
   5  -4  -3  617.64   30.70
   5   4  -3  602.44   30.10
  -5   4   3  611.74   30.60
   4  -4  -3 2081.99   99.19
  -4  -4   3 1963.20   98.59
   4   4  -3 1986.50   98.59
  -4   4   3 2003.80   99.09
  -3  -4   3   36.70    2.30
   3  -4  -3   39.80    3.50
   3   4  -3   37.40    2.30
  -3   4   3   34.60    3.40
   2  -4  -3   12.60    2.10
  -2   4   3   10.80    2.00
  -1  -4   3   54.79    3.10
   1   4  -3   51.59    2.90
   0  -4   3   49.00    3.10
   0   4  -3   46.70    2.90
   1  -4   3  243.18   12.40
  -1   4  -3  242.38   12.30
   2  -4   3  401.66   20.60
  -2  -4  -3  402.86   21.00
   2   4   3  415.06   20.80
  -2   4  -3  415.56   20.50
   3  -4   3 1560.44   78.09
  -3  -4  -3 1575.24   78.29
   3   4   3 1610.94   78.19
  -3   4  -3 1582.74   77.99
  -4  -4  -3   50.29    4.50
   4  -4   3   49.60    4.00
  -4   4  -3   53.79    3.70
   4   4   3   48.30    4.20
  -5  -4  -3  298.77   15.50
   5  -4   3  280.67   15.30
   5   4   3  285.27   15.30
  -5   4  -3  284.37   15.00
   6  -4   3  323.07   16.80
  -6  -4  -3  317.37   17.00
   6   4   3  317.57   16.80
  -6   4  -3  299.47   16.50
  -7  -4  -3   55.49    5.60
   7  -4   3   50.29    5.20
  -7   4  -3   47.80    4.60
   7   4   3   50.49    5.10
   8  -4   3  663.73   35.00
  -8  -4  -3  669.33   34.70
   8  -4   3  662.13   34.60
  -8   4  -3  684.93   34.40
   8   4   3  694.23   34.70
  -9  -4  -3   11.80    3.20
   9  -4   3   13.90    3.20
   9  -4   3   14.80    3.20
  -9   4  -3   12.10    3.20
  -9   4  -3   17.60    3.00
   9   4   3   12.20    3.10
 -10  -4  -3   44.40    6.00
  10  -4   3   56.89    6.00
  10  -4   3   54.59    6.00
 -10   4  -3   52.19    5.90
 -10   4  -3   50.99    5.40
  10   4   3   59.59    6.50
  11  -4   3  194.98   12.30
  11  -4   3  201.68   12.30
 -11  -4  -3  196.28   12.50
 -11   4  -3  198.88   12.10
  11   4   3  205.68   12.40
 -11   4  -3  205.38   12.00
 -12  -4  -3   37.10    4.80
  12  -4   3   28.00    4.50
  12  -4   3   26.50    4.30
 -12   4  -3   35.60    4.50
  12   4   3   32.00    4.60
 -12   4  -3   30.40    4.30
  13  -4   3   88.09    7.90
 -13  -4  -3   86.39    8.60
  13  -4   3   87.59    8.10
 -13   4  -3   77.89    7.40
 -13   4  -3   84.69    7.60
  13   4   3   95.39    8.20
  14  -4   3   88.59    8.70
 -14  -4  -3   92.19    9.30
  14  -4   3   87.19    8.60
 -14   4  -3   96.29    8.30
 -14   4  -3   81.69    8.20
  14   4   3  102.69    9.30
  15  -4   3   37.90    5.50
 -15  -4  -3   29.20    5.70
  15  -4   3   28.80    5.10
 -15   4  -3   32.30    4.90
 -15   4  -3   36.00    5.20
  15   4   3   36.40    5.90
  16  -4   3  359.46   21.10
  16  -4   3  356.86   21.40
 -16   4  -3  361.96   21.00
  16   4   3  338.67   23.40
 -16   4  -3  376.36   20.90
 -17  -4  -3  268.97   18.10
  17  -4   3  274.97   17.90
  17  -4   3  261.67   17.30
 -17   4  -3  277.27   17.50
 -17   4  -3  252.07   16.90
  17   4   3  290.77   18.20
 -18  -4  -3   73.89    8.80
  18  -4   3   84.49   11.00
  18  -4   3   82.09    9.60
 -18   4  -3   83.39    9.80
  18   4   3   75.69    8.90
 -18   4  -3   79.79   10.40
 -19  -4  -3  545.25   30.80
  19  -4   3  502.05   30.70
 -19   4  -3  523.95   30.50
 -19   4  -3  549.65   30.10
  19   4   3  546.55   30.80
 -20  -4  -3    1.10    6.00
  20  -4   3    8.30    8.80
  20   4   3    7.00    6.40
 -21  -4  -3  211.28   17.20
  21  -4   3  215.48   18.20
  21   4   3  230.08   17.80
 -21   4  -3  210.78   17.40
  22  -4   3   11.70    8.20
 -22  -4  -3   14.30    7.20
 -22   4  -3   -0.10    6.60
  22   4   3   24.20    7.90
 -22  -5   3   43.60    7.80
  22  -5  -3   50.79    8.80
  22   5  -3   34.50    8.00
 -22   5   3   44.20    7.70
  21  -5  -3    7.00    6.40
 -21  -5   3    0.80    5.70
 -21   5   3    9.90    5.70
  21   5  -3   10.30    6.00
  20  -5  -3  339.87   21.00
 -20  -5   3  284.57   20.30
 -20   5   3  335.67   20.50
  20   5  -3  314.57   20.60
  19  -5  -3   59.29    8.10
 -19  -5   3   57.59    7.50
  19   5  -3   48.70    7.20
 -19   5   3   52.89    7.20
 -18  -5   3  283.07   18.30
  18  -5  -3  281.17   18.90
  18   5  -3  292.97   18.30
 -18   5   3  299.57   18.50
 -17  -5   3   37.90    6.00
  17  -5  -3   34.90    6.60
  17   5  -3   31.20    5.70
 -17   5   3   36.90    6.20
  16  -5  -3  233.18   15.20
 -16  -5   3  220.68   14.70
 -16   5   3  221.08   15.70
 -16   5   3  228.08   15.40
  16   5  -3  216.88   14.60
 -15  -5   3  107.09    9.80
  15  -5  -3  154.48   10.80
  15  -5  -3   97.49   10.60
  15   5  -3  119.19    9.80
 -15   5   3  117.69   10.80
 -15   5   3  119.49   10.20
  14  -5  -3  282.27   17.20
 -14  -5   3  281.37   16.70
  14  -5  -3  285.17   17.20
 -14   5   3  260.07   16.90
  14   5  -3  273.47   16.60
 -14   5   3  309.17   16.90
  13  -5  -3    7.20    4.10
 -13  -5   3   12.60    4.60
  13  -5  -3    6.30    3.80
  13   5  -3    8.80    4.30
 -13   5   3    2.70    3.90
 -13   5   3    8.40    3.50
 -12  -5   3  463.45   24.60
  12  -5  -3  476.05   24.90
  12  -5  -3  423.86   24.70
 -12   5   3  457.85   24.80
  12   5  -3  472.05   24.60
 -12   5   3  464.95   24.50
 -11  -5   3    4.70    2.70
  11  -5  -3    6.30    3.70
  11  -5  -3    5.30    3.20
 -11   5   3    5.90    3.00
 -11   5   3    2.30    3.20
  11   5  -3    6.30    2.90
  10  -5  -3   63.29    6.40
 -10  -5   3   71.39    5.70
  10  -5  -3   56.99    6.80
 -10   5   3   67.39    6.00
 -10   5   3   66.59    6.40
  10   5  -3   61.79    5.80
   9  -5  -3   70.09    7.10
  -9  -5   3   72.39    5.60
   9  -5  -3   64.99    6.30
  -9   5   3   68.99    6.10
  -9   5   3   67.49    6.20
   9   5  -3   65.99    5.60
   8  -5  -3   16.30    4.30
  -8  -5   3   18.00    2.70
   8  -5  -3   24.00    3.40
  -8   5   3   16.80    3.40
   8   5  -3   17.30    2.70
  -8   5   3   18.60    3.30
   7  -5  -3  218.18   12.60
   7  -5  -3  213.68   13.90
  -7  -5   3  230.58   12.00
  -7   5   3  200.98   12.90
  -7   5   3  222.18   12.50
   7   5  -3  221.78   11.90
  -6  -5   3  615.14   31.10
   6   5  -3  626.24   31.10
  -6   5   3  616.44   32.20
   5  -5  -3  517.35   26.40
  -5  -5   3  517.25   25.80
  -5   5   3  507.25   26.30
   5   5  -3  513.95   25.80
  -4  -5   3 3921.61  199.78
   4  -5  -3 4225.08  200.38
  -4   5   3 4212.08  200.28
   4   5  -3 3950.40  199.78
   3  -5  -3 2923.11  140.89
  -3  -5   3 2810.32  140.29
  -3   5   3 2907.91  140.89
   3   5  -3 2808.32  140.29
   2  -5  -3 2679.23  127.69
  -2  -5   3 2618.84  127.19
   2  -5  -3 2509.05  128.19
   2   5  -3 2585.04  127.09
  -2   5   3 2580.34  127.69
  -2   5   3 2583.74  127.69
  -1  -5   3    5.30    1.10
   1  -5  -3    2.40    2.00
   1   5  -3    2.90    0.90
  -1   5   3    3.00    1.70
   0  -5   3  266.67   13.90
   0  -5  -3  276.17   14.50
   0   5  -3  274.37   13.80
   0   5   3  273.57   14.30
  -1  -5  -3  717.03   36.60
   1  -5   3  736.73   36.30
  -1   5  -3  729.93   36.10
   1   5   3  730.33   36.50
   2  -5   3  304.27   15.90
  -2  -5  -3  315.87   16.30
   2   5   3  309.57   16.10
  -2   5  -3  306.97   15.70
   3  -5   3  296.97   15.70
  -3  -5  -3  314.47   16.10
   3   5   3  298.67   15.90
  -3   5  -3  299.07   15.50
  -4  -5  -3    6.30    2.10
   4  -5   3    6.40    1.90
  -4   5  -3    5.90    1.60
   4   5   3    4.70    1.90
   5  -5   3  118.79    7.70
  -5  -5  -3  121.99    7.90
   5   5   3  123.39    8.60
  -5   5  -3  121.79    7.20
  -6  -5  -3   59.79    5.70
   6  -5   3   54.89    5.30
  -6   5  -3   55.89    4.80
   6   5   3   53.19    5.40
  -7  -5  -3    0.20    2.60
   7  -5   3    0.30    2.50
  -7   5  -3    0.40    2.20
   7   5   3    2.90    2.70
  -8  -5  -3  221.08   12.50
   8  -5   3  184.78   12.10
   8   5   3  224.88   12.30
  -8   5  -3  196.68   11.80
  -9  -5  -3  305.17   17.60
   9  -5   3  311.07   17.60
   9  -5   3  315.77   17.50
  -9   5  -3  324.07   17.50
  -9   5  -3  315.57   17.20
   9   5   3  328.37   17.60
  10  -5   3   45.60    5.70
  10  -5   3   43.50    5.50
 -10  -5  -3   34.40    4.50
 -10   5  -3   39.20    5.10
 -10   5  -3   40.80    5.30
  10   5   3   40.20    4.60
 -11  -5  -3   84.69    7.50
  11  -5   3   80.39    7.20
  11  -5   3   82.89    7.10
 -11   5  -3   82.99    6.80
 -11   5  -3   79.59    6.90
  11   5   3   66.99    7.30
 -12  -5  -3    0.30    3.20
  12  -5   3    1.50    3.10
  12  -5   3    0.80    3.30
 -12   5  -3    1.40    3.00
 -12   5  -3   -2.20    2.90
  12   5   3   -4.10    3.30
 -13  -5  -3  189.78   13.20
  13  -5   3  203.98   12.80
  13  -5   3  195.28   12.80
  13   5   3  186.98   13.00
 -13   5  -3  195.18   12.40
 -13   5  -3  197.68   12.50
  14  -5   3    8.00    4.10
 -14  -5  -3    8.70    4.50
  14  -5   3   11.60    4.10
 -14   5  -3    9.40    3.60
 -14   5  -3   14.20    4.20
  14   5   3    9.40    4.60
  15  -5   3   28.80    5.30
  15  -5   3   28.40    5.20
 -15  -5  -3   29.20    6.30
 -15   5  -3   24.30    4.70
  15   5   3   25.60    6.70
 -15   5  -3   24.40    4.60
  16  -5   3   52.39    6.70
  16  -5   3   52.89    6.60
 -16  -5  -3   58.09    7.10
 -16   5  -3   53.19    6.30
 -16   5  -3   46.00    6.40
  16   5   3   38.90    6.70
 -17  -5  -3   30.60    6.40
  17  -5   3   42.30    6.10
  17  -5   3   28.20    6.30
  17   5   3   41.50    6.80
 -17   5  -3   43.10    6.20
 -17   5  -3   38.10    6.00
  18  -5   3  216.58   16.70
 -18  -5  -3  229.48   16.90
  18  -5   3  256.37   16.20
  18   5   3  238.38   17.00
 -18   5  -3  233.98   16.10
 -18   5  -3  217.98   16.30
 -19  -5  -3   65.89    8.80
  19  -5   3   87.29   10.40
  19  -5   3   65.49    9.20
  19   5   3   73.29    9.30
 -19   5  -3   95.49   11.20
 -19   5  -3   73.69    8.50
 -20  -5  -3  203.98   16.50
  20  -5   3  204.48   20.30
 -20   5  -3  224.08   17.00
  20   5   3  220.68   17.10
 -21  -5  -3   29.10    7.70
  21  -5   3   39.10    9.10
 -21   5  -3   46.10    7.40
  21   5   3   28.70    8.00
  21  -6  -3   21.30    7.30
 -21  -6   3    4.80    5.70
 -21   6   3   21.00    6.70
  21   6  -3    9.50    6.50
  20  -6  -3    6.40    6.60
 -20  -6   3   -1.20    5.20
 -20   6   3    1.00    5.40
  20   6  -3    4.00    5.80
  19  -6  -3   18.30    6.60
 -19  -6   3   15.80    5.50
  19   6  -3   23.50    5.90
 -19   6   3   11.30    5.40
 -18  -6   3  146.39   12.20
  18  -6  -3  162.08   14.00
 -18   6   3  142.49   12.80
  18   6  -3  159.78   12.70
  17  -6  -3   43.70    6.90
 -17  -6   3   38.30    6.10
 -17   6   3   34.10    6.20
  17   6  -3   44.40    6.10
  16  -6  -3    9.40    5.60
 -16  -6   3    6.80    4.20
  16  -6  -3    2.60    4.60
 -16   6   3    2.00    4.50
  16   6  -3   -1.00    4.00
 -16   6   3    0.50    4.70
 -15  -6   3  744.93   38.80
  15  -6  -3  707.83   39.00
  15  -6  -3  728.03   38.80
  15   6  -3  750.02   38.70
 -15   6   3  740.93   38.50
 -15   6   3  741.23   39.00
 -14  -6   3   53.29    7.20
  14  -6  -3   63.79    8.40
  14  -6  -3   68.69    8.10
 -14   6   3   66.99    7.90
  14   6  -3   56.99    7.40
 -14   6   3   56.39    6.40
  13  -6  -3  323.17   19.50
  13  -6  -3  354.76   19.50
 -13  -6   3  334.57   19.20
 -13   6   3  333.57   19.10
 -13   6   3  341.87   19.50
  13   6  -3  353.16   19.30
  12  -6  -3  221.78   13.20
  12  -6  -3  210.28   13.20
 -12  -6   3  188.18   13.40
 -12   6   3  202.88   12.50
 -12   6   3  215.78   13.00
  12   6  -3  195.48   13.80
 -11  -6   3   -0.20    2.60
  11  -6  -3   -0.10    3.40
  11  -6  -3   -3.10    3.00
 -11   6   3    0.50    2.80
  11   6  -3    1.00    2.70
 -11   6   3    3.50    2.90
  10  -6  -3  921.51   48.10
 -10  -6   3  952.80   47.80
  10  -6  -3  951.60   48.20
  10   6  -3  957.70   47.80
 -10   6   3  951.60   47.80
 -10   6   3  938.81   48.10
   9  -6  -3    4.60    3.00
   9  -6  -3    6.60    3.00
  -9  -6   3    5.20    2.40
  -9   6   3    8.00    2.70
  -9   6   3    3.70    2.80
   9   6  -3    7.00    2.40
  -8  -6   3  752.02   37.80
   8  -6  -3  752.12   38.30
   8  -6  -3  726.93   38.10
  -8   6   3  738.53   38.10
  -8   6   3  753.92   37.90
   8   6  -3  756.12   37.70
   7  -6  -3  455.15   24.00
   7  -6  -3  444.76   23.90
  -7  -6   3  468.75   23.40
  -7   6   3  442.26   23.80
  -7   6   3  453.15   23.60
   7   6  -3  457.95   23.30
  -6  -6   3  867.61   43.80
   6  -6  -3  886.61   44.40
   6  -6  -3  886.21   44.30
   6   6  -3  867.61   43.70
  -6   6   3  876.21   44.10
  -5  -6   3  215.18   11.80
   5  -6  -3  232.08   12.80
   5  -6  -3  219.88   12.60
  -5   6   3  211.28   12.20
   5   6  -3  221.98   11.70
  -5   6   3  222.08   12.50
  -4  -6   3 1822.12   91.99
   4  -6  -3 1925.81   92.59
   4  -6  -3 1874.71   92.69
   4   6  -3 1847.32   91.99
  -4   6   3 1860.21   92.39
  -4   6   3 1886.41   92.49
   3  -6  -3   14.50    2.80
   3  -6  -3   15.00    2.70
  -3  -6   3   18.90    2.50
  -3   6   3   14.70    2.40
  -3   6   3   14.90    2.50
   3   6  -3   14.40    1.70
   2  -6  -3  730.93   35.80
   2  -6  -3  704.83   35.90
  -2  -6   3  690.33   35.20
   2   6  -3  703.83   35.20
  -2   6   3  703.43   35.70
  -2   6   3  720.83   35.80
   1  -6  -3  495.55   25.30
  -1  -6   3  491.45   24.70
   1   6  -3  489.25   24.50
  -1   6   3  488.45   25.00
   0  -6  -3 1239.58   60.49
   0  -6   3 1176.88   59.99
   0   6   3 1240.08   60.29
   0   6  -3 1201.68   59.89
   1  -6   3  402.06   20.70
  -1  -6  -3  407.96   21.10
  -1   6  -3  402.96   20.50
   1   6   3  409.06   20.90
   2  -6   3 2172.48  106.69
  -2  -6  -3 2179.48  106.99
  -2   6  -3 2138.59  106.49
   3  -6   3   28.20    3.40
  -3  -6  -3   19.90    2.90
  -3   6  -3   23.80    2.90
   3   6   3   21.00    2.80
   4  -6   3 1275.17   63.79
  -4  -6  -3 1293.97   63.99
  -4   6  -3 1289.87   63.59
   4   6   3 1269.77   63.89
   5  -6   3   86.29    6.40
  -5  -6  -3   84.99    6.80
  -5   6  -3   88.49    6.10
   5   6   3   90.89    6.60
  -6  -6  -3  161.08   10.00
   6  -6   3  150.68    9.60
  -6   6  -3  156.88    9.20
   6   6   3  152.08    9.70
  -7  -6  -3   17.30    3.40
   7  -6   3   11.90    3.10
   7   6   3   10.20    3.00
  -7   6  -3   11.70    2.60
   8  -6   3  175.58   10.80
  -8  -6  -3  172.38   11.00
  -8   6  -3  172.28   10.30
   8   6   3  176.78   10.80
  -9  -6  -3  169.28   11.00
   9  -6   3  171.58   10.90
   9  -6   3  175.48   11.30
   9   6   3  165.98   10.90
  -9   6  -3  169.38   10.50
  -9   6  -3  194.08   12.10
  10  -6   3 1010.30   51.29
  10  -6   3 1011.40   51.09
 -10  -6  -3 1002.10   51.39
  10   6   3 1015.00   51.59
 -10   6  -3 1029.80   51.09
 -10   6  -3  979.80   50.89
  11  -6   3  212.18   13.00
 -11  -6  -3  213.08   13.20
  11  -6   3  191.98   12.80
  11   6   3  208.88   13.00
 -11   6  -3  218.38   12.80
 -11   6  -3  208.58   12.60
  12  -6   3  266.77   15.70
 -12  -6  -3  261.27   16.10
  12  -6   3  264.57   15.90
 -12   6  -3  275.57   15.60
 -12   6  -3  261.57   15.60
  12   6   3  279.47   16.20
  13  -6   3   62.59    8.00
 -13  -6  -3   76.89    8.70
  13  -6   3   76.99    7.60
 -13   6  -3   79.09    7.40
 -13   6  -3   82.99    7.60
  13   6   3   65.79    8.40
 -14  -6  -3   22.80    5.20
  14  -6   3   23.80    4.80
  14  -6   3   25.90    4.90
 -14   6  -3   29.50    4.80
 -14   6  -3   22.00    4.20
  14   6   3   30.30    5.50
  15  -6   3   39.00    6.00
  15  -6   3   30.50    5.60
 -15  -6  -3   48.30    6.50
 -15   6  -3   34.00    5.50
  15   6   3   35.30    6.20
 -15   6  -3   42.60    5.70
 -16  -6  -3   -1.90    4.50
  16  -6   3   -3.30    4.40
  16  -6   3    1.20    4.70
  16   6   3   -0.40    4.80
 -16   6  -3   -6.10    4.30
 -16   6  -3    5.30    4.30
 -17  -6  -3   19.50    5.50
  17  -6   3   21.80    5.80
  17  -6   3   24.00    5.90
 -17   6  -3    5.70    5.00
  17   6   3   11.30    5.70
 -17   6  -3   18.40    5.10
 -18  -6  -3   41.70    6.60
  18  -6   3   15.60    6.70
  18  -6   3   14.20    5.60
 -18   6  -3   29.50    6.10
  18   6   3   23.80    6.50
 -18   6  -3   29.20    6.00
 -19  -6  -3    8.30    5.70
  19  -6   3    6.20    6.80
  19  -6   3    6.60    5.60
 -19   6  -3   -6.40    5.70
  19   6   3   -1.20    6.20
 -19   6  -3    7.60    5.60
 -20  -6  -3    9.10    6.20
  20  -6   3   10.20    7.40
  20   6   3    1.90    6.50
 -20   6  -3   -0.60    5.90
 -21  -6  -3   11.30    6.60
  21  -6   3   39.80   11.80
  21   6   3   15.30    7.40
  21  -7  -3   82.89   10.00
 -21  -7   3   90.39   11.90
 -21   7   3   97.99   12.10
  21   7  -3   82.89    9.80
 -20  -7   3  107.09   11.60
  20  -7  -3   92.29   10.80
 -20   7   3  111.29   12.00
  20   7  -3  110.99   11.90
  19  -7  -3    2.20    6.30
 -19  -7   3  -11.10    4.60
  19   7  -3    3.30    5.00
 -19   7   3    8.10    5.40
 -18  -7   3  454.15   26.30
  18  -7  -3  445.66   27.10
  18   7  -3  465.55   26.50
 -18   7   3  473.75   26.70
  17  -7  -3   34.30    6.80
 -17  -7   3   38.90    5.90
 -17   7   3   29.00    6.20
  17   7  -3   26.30    5.60
  16  -7  -3  407.26   22.80
 -16  -7   3  400.06   22.90
  16  -7  -3  394.96   23.70
  16   7  -3  385.36   22.80
 -16   7   3  394.06   22.70
 -16   7   3  409.26   23.30
 -15  -7   3  107.89    9.70
  15  -7  -3  119.19   10.80
  15  -7  -3  109.79    9.70
 -15   7   3  129.79   10.00
 -15   7   3   97.99   10.10
  15   7  -3  112.19    9.70
 -14  -7   3  484.55   26.20
  14  -7  -3  480.35   26.20
  14  -7  -3  463.85   26.60
 -14   7   3  489.45   25.90
  14   7  -3  481.95   26.10
 -14   7   3  461.45   26.30
  13  -7  -3  243.78   14.80
  13  -7  -3  237.68   15.10
 -13  -7   3  231.88   14.50
  13   7  -3  249.38   14.60
 -13   7   3  241.18   14.80
 -13   7   3  227.68   14.30
 -12  -7   3  385.06   21.70
  12  -7  -3  380.26   22.00
  12  -7  -3  391.16   21.90
  12   7  -3  405.26   21.70
 -12   7   3  401.86   21.50
 -12   7   3  409.46   21.90
 -11  -7   3  553.54   29.10
  11  -7  -3  545.35   29.50
  11  -7  -3  567.54   29.50
 -11   7   3  540.65   29.20
  11   7  -3  562.04   29.10
 -11   7   3  560.64   29.00
  10  -7  -3    4.60    3.10
 -10  -7   3    4.20    2.60
  10  -7  -3    2.10    3.00
  10   7  -3    6.60    2.70
 -10   7   3    4.30    2.90
 -10   7   3    1.90    2.70
   9  -7  -3  302.37   16.50
   9  -7  -3  275.87   16.20
  -9  -7   3  300.17   15.80
  -9   7   3  277.47   15.90
   9   7  -3  290.87   15.70
  -9   7   3  280.87   16.10
   8  -7  -3 1193.88   60.39
   8  -7  -3 1165.48   60.19
  -8  -7   3 1183.98   59.79
  -8   7   3 1216.18   59.99
   8   7  -3 1209.38   59.69
  -8   7   3 1212.48   60.19
   7  -7  -3   79.99    6.70
  -7  -7   3   76.99    5.90
   7  -7  -3   75.39    6.80
  -7   7   3   87.49    6.40
   7   7  -3   78.89    5.80
  -7   7   3   77.09    6.40
  -6  -7   3  225.08   12.40
   6  -7  -3  225.98   13.40
  -6   7   3  221.88   12.80
   6   7  -3  235.88   12.40
   5  -7  -3  657.03   34.00
   5  -7  -3  672.83   33.90
  -5  -7   3  654.73   33.30
   5   7  -3  664.43   33.20
  -5   7   3  662.43   33.70
  -5   7   3  661.33   33.80
   4  -7  -3  996.80   48.30
   4  -7  -3  931.71   48.30
  -4  -7   3  955.10   47.70
  -4   7   3  965.20   48.10
  -4   7   3  962.30   48.00
   4   7  -3  933.81   47.50
   3  -7  -3  631.04   33.60
   3  -7  -3  654.13   33.50
  -3  -7   3  646.84   33.00
  -3   7   3  666.73   33.40
   3   7  -3  662.23   32.90
  -3   7   3  682.63   33.50
   2  -7  -3 1002.20   50.69
  -2  -7   3  997.70   50.19
   2  -7  -3 1007.70   50.89
   2   7  -3 1012.80   50.09
  -2   7   3 1020.30   50.59
  -2   7   3 1031.80   50.79
   1  -7  -3  359.46   19.10
  -1  -7   3  360.36   18.40
   1   7  -3  357.16   18.20
  -1   7   3  355.96   18.70
   0  -7   3  876.01   44.00
   0  -7  -3  872.51   44.50
   0   7   3  894.21   44.30
   0   7  -3  885.41   43.80
  -1  -7  -3 1755.92   86.99
   1  -7   3 1752.12   86.59
   1   7   3 1743.83   86.69
  -1   7  -3 1744.33   86.39
   2  -7   3  197.78   11.30
  -2  -7  -3  199.38   11.80
   2   7   3  203.68   11.50
  -2   7  -3  214.08   11.00
  -3  -7  -3   49.30    5.30
   3  -7   3   49.99    4.80
  -3   7  -3   47.30    4.30
   3   7   3   56.89    5.10
  -4  -7  -3    4.20    2.70
   4  -7   3    2.50    2.40
   4   7   3    3.00    2.20
  -4   7  -3    3.60    2.00
   5  -7   3   17.10    3.10
  -5  -7  -3   19.30    3.30
   5   7   3   20.60    3.20
  -5   7  -3   20.40    2.90
   6  -7   3    3.40    2.70
  -6  -7  -3    5.60    2.80
   6   7   3    6.70    2.70
  -6   7  -3    6.10    2.30
  -7  -7  -3   51.39    5.70
   7  -7   3   48.10    5.50
  -7   7  -3   51.69    5.00
   7   7   3   46.80    5.50
  -8  -7  -3  358.46   20.00
   8  -7   3  357.36   19.90
   8   7   3  371.16   19.80
  -8   7  -3  367.46   19.50
  -9  -7  -3  283.57   16.20
   9  -7   3  284.07   16.00
   9   7   3  269.07   15.90
  -9   7  -3  278.97   15.50
  10  -7   3  532.45   27.80
  10  -7   3  521.15   27.50
 -10  -7  -3  498.85   27.80
  10   7   3  516.65   27.60
 -10   7  -3  507.05   27.20
 -10   7  -3  538.45   27.40
 -11  -7  -3    7.40    3.70
  11  -7   3    2.00    3.20
  11  -7   3    4.40    3.50
  11   7   3    5.50    3.60
 -11   7  -3    3.30    2.80
 -11   7  -3    5.00    3.10
  12  -7   3  124.79    9.80
 -12  -7  -3  119.19   10.00
  12  -7   3  126.79    9.60
 -12   7  -3  126.59    9.20
 -12   7  -3  128.39    9.40
  12   7   3  116.49    9.80
  13  -7   3  122.49    9.50
 -13  -7  -3  106.69   10.20
  13  -7   3  100.99    9.10
 -13   7  -3  107.49    8.80
 -13   7  -3  101.99    8.90
  13   7   3  104.19    9.70
  14  -7   3    1.20    4.10
  14  -7   3    0.30    3.90
 -14  -7  -3    2.30    5.10
 -14   7  -3    8.90    3.60
 -14   7  -3    3.40    3.80
  14   7   3    3.00    4.40
 -15  -7  -3   83.79    9.80
  15  -7   3   94.39    9.60
  15  -7   3   98.29   10.40
 -15   7  -3   78.39    8.90
 -15   7  -3   89.19    8.90
  15   7   3   99.39   10.00
  16  -7   3  105.89   10.80
 -16  -7  -3  117.79   11.30
  16  -7   3   87.09   10.60
  16   7   3  109.69   11.00
 -16   7  -3  107.19   10.10
 -16   7  -3  130.29   10.70
  17  -7   3   58.09    7.40
 -17  -7  -3   59.79    7.80
  17  -7   3   55.79    7.50
 -17   7  -3   73.79    8.70
  17   7   3   57.69    7.70
 -17   7  -3   48.10    7.00
  18  -7   3    4.00    5.70
 -18  -7  -3   15.30    5.70
  18  -7   3   24.40    6.20
 -18   7  -3    7.90    5.20
  18   7   3    6.00    5.80
 -18   7  -3    9.60    5.60
 -19  -7  -3    2.00    5.40
  19  -7   3    5.80    6.90
  19  -7   3    2.90    5.80
 -19   7  -3   16.10    6.60
  19   7   3    1.20    6.00
 -19   7  -3    2.00    5.20
 -20  -7  -3  127.39   13.40
  20   7   3  142.59   14.40
 -21  -7  -3   -0.30    6.70
  21   7   3   -1.30    7.00
  21  -8  -3    5.70    7.50
 -21  -8   3    7.90    6.20
 -21   8   3   -4.20    6.20
  21   8  -3   12.20    6.90
  20  -8  -3   -9.60    6.70
 -20  -8   3   -1.10    5.60
 -20   8   3    9.30    6.20
  20   8  -3  -11.70    5.30
  19  -8  -3   23.60    7.20
 -19  -8   3   17.80    5.80
  19   8  -3   27.10    6.20
 -19   8   3   19.20    6.10
  18  -8  -3  136.49   13.40
 -18  -8   3  123.09   12.00
  18   8  -3  142.99   12.30
 -18   8   3  157.58   12.80
 -17  -8   3   -2.40    4.10
  17  -8  -3   -9.80    6.00
  17   8  -3    1.60    4.40
 -17   8   3    0.90    6.00
 -16  -8   3   80.19    9.00
  16  -8  -3   84.69    8.90
  16  -8  -3   84.49    9.30
  16   8  -3   71.49    8.80
 -16   8   3   80.99    9.60
 -16   8   3   86.29    9.40
  15  -8  -3   -3.00    4.90
  15  -8  -3    7.40    4.30
 -15  -8   3    1.50    4.10
 -15   8   3   -6.00    4.30
  15   8  -3    4.20    4.00
 -15   8   3    3.50    4.40
  14  -8  -3  211.38   17.10
  14  -8  -3  230.28   14.80
 -14  -8   3  218.98   14.10
 -14   8   3  203.08   14.20
 -14   8   3  216.28   13.80
  14   8  -3  213.08   13.80
  13  -8  -3   20.20    4.90
 -13  -8   3   23.40    4.40
  13  -8  -3   19.80    4.60
 -13   8   3   18.60    4.50
  13   8  -3   28.00    4.50
 -13   8   3   22.20    4.20
  12  -8  -3   33.90    5.00
  12  -8  -3   39.40    5.20
 -12  -8   3   43.70    5.20
  12   8  -3   31.40    4.70
 -12   8   3   35.40    4.60
 -12   8   3   44.60    5.30
 -11  -8   3   43.90    5.30
  11  -8  -3   50.19    6.50
  11  -8  -3   48.90    5.50
 -11   8   3   45.90    5.10
 -11   8   3   53.09    6.20
  11   8  -3   44.80    5.10
  10  -8  -3  114.79    8.90
  10  -8  -3  107.99    8.70
 -10  -8   3  115.89    8.30
 -10   8   3  116.59    8.60
 -10   8   3  112.49    8.40
  10   8  -3  112.09    8.10
  -9  -8   3  529.15   27.80
   9  -8  -3  543.25   28.40
   9  -8  -3  524.35   28.20
  -9   8   3  545.65   28.20
  -9   8   3  526.95   27.90
   9   8  -3  543.05   27.80
   8  -8  -3   19.50    3.60
   8  -8  -3   27.60    3.80
  -8  -8   3   29.50    3.40
  -8   8   3   23.00    3.60
   8   8  -3   24.70    3.30
  -8   8   3   29.20    3.80
  -7  -8   3    8.50    2.40
   7  -8  -3   13.00    3.20
   7  -8  -3   10.90    3.00
  -7   8   3    9.80    2.80
   7   8  -3    7.70    2.30
  -7   8   3    8.40    2.70
   6  -8  -3   25.90    4.00
  -6  -8   3   29.90    4.10
  -6   8   3   26.60    3.40
   6   8  -3   29.00    3.80
   5  -8  -3   59.29    6.30
   5  -8  -3   62.59    6.00
  -5  -8   3   68.99    5.30
  -5   8   3   61.59    5.70
   5   8  -3   65.19    4.90
  -5   8   3   61.49    5.90
  -4  -8   3   25.10    3.00
   4  -8  -3   27.80    3.70
   4  -8  -3   31.60    3.90
  -4   8   3   20.80    3.30
  -4   8   3   27.50    3.50
   4   8  -3   22.70    2.70
   3  -8  -3   59.59    6.10
  -3  -8   3   62.79    5.00
   3  -8  -3   69.79    6.00
  -3   8   3   56.19    5.80
  -3   8   3   63.39    5.60
   3   8  -3   59.99    4.70
   2  -8  -3  111.19    7.90
  -2  -8   3  113.99    7.00
   2  -8  -3  110.99    7.80
   2   8  -3  106.29    6.60
  -2   8   3  115.49    8.70
  -2   8   3  105.69    7.30
   1  -8  -3  579.64   30.30
  -1  -8   3  580.24   29.70
  -1   8   3  590.34   30.00
   1   8  -3  593.84   29.50
   0  -8   3  131.89    8.10
   0  -8  -3  134.09    8.80
   0   8  -3  131.39    7.80
   0   8   3  140.89    9.30
  -1  -8  -3  116.09    8.00
   1  -8   3  115.49    7.30
  -1   8  -3  113.69    6.80
   1   8   3  107.69    7.50
   2  -8   3   67.99    5.60
  -2  -8  -3   79.09    6.40
  -2   8  -3   74.19    5.30
   2   8   3   72.19    6.00
   3  -8   3  216.98   12.30
  -3  -8  -3  211.68   12.70
   3   8   3  217.58   12.40
  -3   8  -3  221.48   12.00
   4  -8   3   66.09    5.70
  -4  -8  -3   64.99    6.00
  -4   8  -3   63.99    5.20
   4   8   3   64.49    5.70
  -5  -8  -3    8.60    2.90
   5  -8   3    4.10    2.60
   5   8   3    3.40    2.60
  -5   8  -3    6.30    2.40
   6  -8   3  132.69    8.70
  -6  -8  -3  124.39    9.00
   6   8   3  130.59    8.70
  -6   8  -3  127.49    8.10
   7  -8   3   77.09    6.70
  -7  -8  -3   75.49    6.90
  -7   8  -3   71.29    6.00
   7   8   3   73.59    6.70
  -8  -8  -3 1068.79   55.99
   8  -8   3 1143.19   55.99
  -8   8  -3 1118.69   55.59
   8   8   3 1085.79   55.79
  -9  -8  -3  103.09    8.30
   9  -8   3   92.89    7.90
  -9   8  -3   97.49    7.50
   9   8   3   94.19    7.90
  10  -8   3  957.80   48.90
 -10  -8  -3  948.01   49.30
  10  -8   3  981.40   49.20
 -10   8  -3  938.61   48.70
 -10   8  -3  968.90   49.10
  10   8   3  959.00   49.10
 -11  -8  -3   72.69    8.20
  11  -8   3   68.99    7.80
  11  -8   3   76.19    7.90
 -11   8  -3   79.29    7.30
  11   8   3   84.29    8.10
 -11   8  -3   82.99    7.30
 -12  -8  -3  730.33   39.10
  12  -8   3  733.03   38.90
  12  -8   3  759.12   38.50
 -12   8  -3  732.43   38.40
  12   8   3  733.33   38.90
 -12   8  -3  742.13   38.30
 -13  -8  -3   39.00    7.40
  13  -8   3   34.50    5.70
  13  -8   3   33.10    5.40
  13   8   3   30.80    6.90
 -13   8  -3   49.60    6.60
 -13   8  -3   41.50    5.40
  14  -8   3    3.70    4.20
  14  -8   3    3.00    4.10
 -14  -8  -3    2.10    4.50
 -14   8  -3    8.70    4.60
 -14   8  -3    1.70    4.10
  14   8   3    2.30    4.50
  15  -8   3   17.40    5.30
  15  -8   3   23.60    5.20
 -15  -8  -3   13.00    5.20
  15   8   3   16.50    5.20
 -15   8  -3   11.50    4.80
 -15   8  -3   18.60    4.50
  16  -8   3   -1.40    5.00
 -16  -8  -3   -8.00    4.70
  16  -8   3    6.30    5.10
  16   8   3    0.20    4.80
 -16   8  -3   10.10    4.40
 -16   8  -3    7.50    5.00
  17  -8   3  193.58   14.30
  17  -8   3  174.08   14.10
 -17  -8  -3  188.58   14.10
 -17   8  -3  160.28   13.60
  17   8   3  177.48   13.90
 -17   8  -3  152.38   12.80
  18  -8   3  155.88   14.00
  18  -8   3  144.79   13.40
 -18  -8  -3  153.68   13.40
  18   8   3  149.69   13.40
 -18   8  -3  158.58   12.90
 -18   8  -3  150.78   13.80
  19  -8   3   96.19   11.90
 -19  -8  -3  105.49   11.90
  19   8   3   93.09   12.00
 -19   8  -3   79.19    9.70
 -20  -8  -3   18.90    6.80
  20   8   3   27.50    7.10
 -20  -9   3  205.88   16.60
  20  -9  -3  212.68   18.50
 -20   9   3  230.08   16.70
  20   9  -3  229.68   17.00
  19  -9  -3   14.10    7.30
 -19  -9   3   -0.40    5.30
  19   9  -3   -1.20    5.20
 -19   9   3   -5.00    5.90
 -18  -9   3  332.87   20.50
  18  -9  -3  354.46   21.50
 -18   9   3  305.17   20.60
  18   9  -3  317.07   20.30
  17  -9  -3   95.19   11.60
 -17  -9   3   73.89    9.70
  17   9  -3   91.89    9.80
 -16  -9   3  193.28   13.60
  16  -9  -3  194.88   14.90
  16  -9  -3  187.58   13.70
 -16   9   3  213.58   14.30
 -16   9   3  166.48   13.70
  16   9  -3  184.28   13.40
 -15  -9   3    8.50    4.40
  15  -9  -3    3.60    5.20
  15  -9  -3   11.60    4.90
 -15   9   3   -5.60    4.20
 -15   9   3    6.30    4.60
  15   9  -3   -4.00    4.00
  14  -9  -3   23.90    5.20
 -14  -9   3   27.10    5.00
  14  -9  -3   16.80    5.20
 -14   9   3   24.20    4.90
 -14   9   3   34.10    5.40
  14   9  -3   17.30    4.60
  13  -9  -3    1.20    4.10
 -13  -9   3    2.00    3.50
  13  -9  -3    3.30    4.40
  13   9  -3    3.70    3.60
 -13   9   3   -2.90    3.80
 -13   9   3    2.20    3.70
  12  -9  -3    7.80    3.80
 -12  -9   3    4.70    3.40
  12  -9  -3    0.70    3.80
 -12   9   3    1.50    3.60
 -12   9   3    4.20    3.60
  12   9  -3    6.20    3.40
  11  -9  -3   26.70    4.70
  11  -9  -3   23.60    4.70
 -11  -9   3   29.90    4.30
 -11   9   3   32.00    4.50
  11   9  -3   29.60    4.30
 -11   9   3   33.20    4.40
  10  -9  -3    4.30    3.40
  10  -9  -3    7.70    3.50
 -10  -9   3    5.40    3.80
 -10   9   3    4.30    3.20
 -10   9   3    6.80    3.20
  10   9  -3   -0.80    3.20
  -9  -9   3    3.30    2.70
   9  -9  -3    6.90    3.40
   9  -9  -3    5.10    3.20
   9   9  -3    3.90    2.70
  -9   9   3    2.40    2.80
  -9   9   3    0.80    2.80
   8  -9  -3   56.99    6.30
   8  -9  -3   61.69    6.40
  -8  -9   3   64.49    5.80
  -8   9   3   54.29    5.90
  -8   9   3   58.39    6.10
   8   9  -3   65.89    5.60
  -7  -9   3    6.30    2.70
   7  -9  -3    9.80    3.20
   7  -9  -3    7.70    3.20
   7   9  -3    6.70    2.40
  -7   9   3   11.80    3.00
  -7   9   3    3.10    2.60
  -6  -9   3  102.89    7.00
   6  -9  -3   94.59    7.70
  -6   9   3   94.49    7.30
   6   9  -3  102.49    6.70
  -5  -9   3    0.00    2.10
   5  -9  -3    1.90    2.90
   5  -9  -3    1.80    2.80
  -5   9   3    5.60    2.60
  -5   9   3    1.30    2.70
   5   9  -3    4.20    2.00
   4  -9  -3  367.56   19.60
  -4  -9   3  343.77   19.00
   4  -9  -3  361.76   19.80
  -4   9   3  361.46   19.40
  -4   9   3  375.56   19.50
   4   9  -3  362.16   18.90
  -3  -9   3   24.40    3.10
   3  -9  -3   27.90    3.90
   3  -9  -3   20.70    3.60
  -3   9   3   24.30    3.50
  -3   9   3   26.20    3.60
   3   9  -3   28.20    3.60
  -2  -9   3  221.18   12.00
   2  -9  -3  218.48   12.80
   2  -9  -3  217.28   13.00
   2   9  -3  215.98   11.70
  -2   9   3  203.48   12.30
   1  -9  -3    9.30    3.10
  -1  -9   3   10.90    2.40
   1   9  -3    9.60    2.10
  -1   9   3   12.20    2.80
   0  -9   3   25.10    3.10
   0  -9  -3   26.20    3.70
   0   9  -3   21.30    2.70
   0   9   3   20.40    3.20
   1  -9   3   67.39    5.60
  -1  -9  -3   64.79    6.30
   1   9   3   73.79    6.00
  -1   9  -3   68.99    5.10
  -2  -9  -3  984.00   51.59
   2  -9   3 1050.39   51.39
  -2   9  -3 1022.30   51.09
   2   9   3 1032.50   51.39
  -3  -9  -3   25.40    3.70
   3  -9   3   25.80    3.50
   3   9   3   22.50    3.40
  -3   9  -3   30.30    3.90
  -4  -9  -3  661.03   34.00
   4  -9   3  648.24   33.70
   4   9   3  658.53   33.70
  -4   9  -3  655.83   33.40
  -5  -9  -3  465.65   25.10
   5  -9   3  490.05   25.10
   5   9   3  478.25   24.90
  -5   9  -3  459.05   24.50
  -6  -9  -3  318.17   17.70
   6  -9   3  317.37   17.60
   6   9   3  317.67   17.50
  -6   9  -3  313.37   17.10
  -7  -9  -3  277.57   16.30
   7  -9   3  282.87   16.10
  -7   9  -3  295.67   15.70
   7   9   3  271.17   15.90
   8  -9   3  282.57   16.20
  -8  -9  -3  277.97   16.40
  -8   9  -3  279.17   15.60
   8   9   3  279.67   16.10
   9  -9   3  326.07   18.70
  -9  -9  -3  331.57   18.80
  -9   9  -3  318.27   18.10
   9   9   3  332.07   18.50
  10  -9   3  145.19   11.30
 -10  -9  -3  181.58   12.00
  10   9   3  178.08   11.80
 -10   9  -3  171.88   11.00
 -11  -9  -3   69.99    8.50
  11  -9   3   74.89    7.10
  11  -9   3   75.79    8.00
 -11   9  -3   67.79    7.50
 -11   9  -3   61.89    7.30
  11   9   3   81.59    8.30
  12  -9   3   46.20    6.00
  12  -9   3   49.80    5.90
 -12  -9  -3   47.50   10.10
  12   9   3   39.40    7.00
 -12   9  -3   52.09    5.80
 -12   9  -3   41.60    5.40
  13  -9   3  181.88   12.90
 -13  -9  -3  180.58   13.10
  13  -9   3  168.38   12.30
  13   9   3  182.58   12.90
 -13   9  -3  165.48   12.00
 -13   9  -3  169.38   11.80
  14  -9   3   90.49    9.30
  14  -9   3   76.89    9.50
 -14  -9  -3   73.89    9.50
 -14   9  -3   80.69    8.10
  14   9   3   77.39    9.50
 -14   9  -3   80.69    9.00
  15  -9   3   35.20    6.20
 -15  -9  -3   35.50    6.40
  15  -9   3   45.50    6.20
 -15   9  -3   34.90    6.00
  15   9   3   56.89    7.00
 -15   9  -3   31.90    5.30
 -16  -9  -3   80.89    9.90
  16  -9   3   79.09   10.00
  16  -9   3   68.59    8.10
 -16   9  -3   57.39    7.00
  16   9   3   67.69    8.00
 -16   9  -3   55.69    7.30
 -17  -9  -3   -5.70    5.20
  17  -9   3    2.40    5.80
  17  -9   3   -6.70    5.60
 -17   9  -3    5.70    5.50
  17   9   3    1.80    5.30
  18  -9   3    0.90    6.00
 -18  -9  -3    4.80    5.60
 -18   9  -3   -3.50    6.00
  18   9   3   18.60    6.50
  19  -9   3   21.90    7.80
 -19  -9  -3   32.70    7.10
  19   9   3   16.50    6.70
 -20  -9  -3   36.80    7.80
  20   9   3   43.50    8.30
 -20 -10   3   20.10    6.60
  20 -10  -3   19.80    8.20
 -20  10   3   25.10    7.10
  20  10  -3   10.40    6.40
 -19 -10   3   47.10    7.30
  19 -10  -3   54.09    9.40
 -19  10   3   64.49    8.40
  19  10  -3   39.80    7.30
 -18 -10   3    2.60    4.80
  18 -10  -3   20.60    7.10
 -18  10   3    1.40    5.50
  18  10  -3    2.30    5.00
 -17 -10   3   24.60    5.50
 -17  10   3   31.80   11.00
  17  10  -3   22.50    5.60
  16 -10  -3   43.70    6.40
  16 -10  -3   46.50    7.30
 -16 -10   3   42.90    6.10
 -16  10   3   36.80    6.60
  16  10  -3   43.70    6.10
 -16  10   3   45.40    6.60
 -15 -10   3   -4.00    3.80
  15 -10  -3    5.70    4.90
  15 -10  -3   -5.50    5.20
 -15  10   3    8.40    4.70
 -15  10   3    8.30    5.10
  14 -10  -3  310.57   19.70
  14 -10  -3  321.57   19.30
 -14 -10   3  309.17   18.70
 -14  10   3  310.97   18.80
  14  10  -3  310.77   18.60
 -14  10   3  332.97   19.30
  13 -10  -3   57.19    6.70
 -13 -10   3   54.89    7.30
  13 -10  -3   60.79    6.90
 -13  10   3   52.59    6.30
  13  10  -3   57.59    7.20
 -13  10   3   73.89    8.00
 -12 -10   3   71.79    7.60
  12 -10  -3   71.99    8.50
  12 -10  -3   62.09    8.20
 -12  10   3   63.69    7.80
  12  10  -3   76.89    7.40
 -12  10   3   67.09    7.90
  11 -10  -3    7.30    4.00
  11 -10  -3    5.80    3.90
 -11 -10   3    7.40    3.30
 -11  10   3    5.40    3.50
 -11  10   3    0.40    3.50
  11  10  -3   -0.40    3.10
  10 -10  -3    4.40    3.80
 -10 -10   3    8.50    3.40
  10 -10  -3   14.30    4.10
  10  10  -3    8.10    3.10
 -10  10   3    3.60    3.40
 -10  10   3    3.70    3.30
   9 -10  -3  117.99    9.10
  -9 -10   3  113.09    8.60
   9 -10  -3  120.09    9.20
  -9  10   3  117.59    8.60
  -9  10   3  115.19    8.80
   9  10  -3  108.49    8.30
   8 -10  -3  175.88   11.50
   8 -10  -3  183.08   11.80
  -8 -10   3  182.18   11.20
   8  10  -3  172.18   10.90
  -8  10   3  175.08   11.20
  -8  10   3  182.38   11.30
  -7 -10   3    4.30    2.60
   7 -10  -3    2.90    3.10
   7 -10  -3    2.80    3.00
  -7  10   3    3.20    2.70
   7  10  -3    2.00    2.50
  -7  10   3    0.90    2.70
  -6 -10   3  229.68   13.50
   6 -10  -3  240.08   14.20
   6  10  -3  237.78   13.30
  -6  10   3  233.98   13.70
  -6  10   3  246.28   13.80
   5 -10  -3   64.99    6.70
   5 -10  -3   80.09    6.70
  -5 -10   3   68.49    5.90
  -5  10   3   63.99    6.30
   5  10  -3   75.99    5.70
  -5  10   3   75.59    6.50
   4 -10  -3    5.80    3.10
   4 -10  -3    7.30    3.00
  -4 -10   3    8.50    2.60
   4  10  -3    7.00    2.30
  -4  10   3   13.30    3.00
  -4  10   3    8.90    2.80
   3 -10  -3   96.89    7.70
  -3 -10   3   95.59    6.80
   3 -10  -3   97.99    7.70
   3  10  -3   90.89    6.40
  -3  10   3   96.29    7.10
  -3  10   3   93.29    7.40
   2 -10  -3  126.89    8.80
  -2 -10   3  131.39    8.10
  -2  10   3  120.99    8.30
   2  10  -3  119.99    7.60
   1 -10  -3  146.99    9.90
  -1 -10   3  149.88    9.20
  -1  10   3  151.38    9.40
   1  10  -3  153.78    8.90
   0 -10   3   84.49    6.30
   0 -10  -3   83.59    7.00
   0  10  -3   80.89    5.80
   0  10   3   91.19    6.60
   1 -10   3  431.76   23.40
  -1 -10  -3  451.85   23.80
   1  10   3  445.66   23.50
  -1  10  -3  453.95   23.00
  -2 -10  -3   33.70    4.10
   2 -10   3   31.90    3.80
   2  10   3   26.90    3.60
  -2  10  -3   29.60    3.30
  -3 -10  -3  529.25   28.00
   3 -10   3  541.05   27.80
  -3  10  -3  525.85   27.40
   3  10   3  530.15   27.70
  -4 -10  -3    0.90    2.80
   4 -10   3    2.10    2.60
   4  10   3    0.90    2.50
  -4  10  -3    1.50    2.20
   5 -10   3  370.96   20.20
  -5 -10  -3  371.86   20.40
  -5  10  -3  369.46   19.60
   5  10   3  364.46   20.00
   6 -10   3  435.86   23.70
  -6 -10  -3  455.95   23.90
   6  10   3  435.76   23.60
  -6  10  -3  434.96   23.30
  -7 -10  -3   84.99    7.60
   7 -10   3   82.99    7.30
   7  10   3   75.29    7.20
  -7  10  -3   82.09    6.70
  -8 -10  -3  492.85   27.40
   8 -10   3  526.35   27.40
  -8  10  -3  520.65   26.90
   8  10   3  491.65   27.10
  -9 -10  -3   19.80    4.60
   9 -10   3   25.50    4.50
  -9  10  -3   23.80    4.10
   9  10   3   29.00    4.80
  10 -10   3  526.85   29.20
 -10 -10  -3  540.75   29.30
  10  10   3  547.25   29.10
 -10  10  -3  539.45   28.70
 -11 -10  -3    9.30    5.30
  11 -10   3   10.70    5.20
  11 -10   3   13.30    4.30
 -11  10  -3    7.80    3.70
 -11  10  -3   11.60    4.60
  11  10   3    7.20    4.40
  12 -10   3   84.59    9.30
  12 -10   3   70.69    9.10
 -12 -10  -3   93.59    9.40
  12  10   3   91.09    9.60
 -12  10  -3   78.39    8.50
 -12  10  -3   94.69    8.40
  13 -10   3   97.29   10.30
  13 -10   3  104.39   10.10
 -13 -10  -3   98.09   10.10
  13  10   3   92.19   10.30
 -13  10  -3   93.39    9.60
 -13  10  -3  107.59    9.30
 -14 -10  -3   73.99    8.50
  14 -10   3   88.49    9.80
  14 -10   3   82.19   10.00
 -14  10  -3   95.09    9.40
 -14  10  -3   79.49    8.60
  14  10   3   72.59    9.40
 -15 -10  -3   59.69    7.60
  15 -10   3   58.49    7.70
  15 -10   3   66.59    7.40
 -15  10  -3   81.59    9.50
 -15  10  -3   67.29    7.70
  15  10   3   62.79    7.80
 -16 -10  -3   35.80    6.70
  16  10   3   41.90    6.60
 -17 -10  -3   97.39   11.40
  17 -10   3   91.89   11.80
  17  10   3  114.89   11.50
 -17  10  -3  103.39   13.80
 -18 -10  -3   57.29    8.00
  18 -10   3   42.90    7.60
 -18  10  -3   60.39    8.10
  18  10   3   53.79    7.90
 -19 -10  -3   56.69    8.60
  19 -10   3   61.09    8.80
 -19  10  -3   62.39    9.10
  19  10   3   71.49    9.00
 -19 -11   3    4.10    5.70
  19 -11  -3   -4.30    7.50
 -19  11   3   10.80    6.60
  19  11  -3    2.30    5.70
  18 -11  -3   -0.40    7.10
 -18 -11   3    2.40    5.00
  18  11  -3   -1.20    4.80
 -18  11   3    7.80    5.90
 -17 -11   3    4.50    4.80
  17 -11  -3   10.70    8.70
 -17  11   3   18.50    6.20
  17  11  -3    5.90    4.80
 -16 -11   3   51.49    6.90
  16 -11  -3   59.99    8.00
 -16  11   3   57.59    7.30
 -16  11   3   40.80    7.20
  16  11  -3   64.69    8.20
  15 -11  -3  222.48   16.60
 -15 -11   3  255.97   16.30
  15 -11  -3  251.57   17.40
 -15  11   3  272.07   16.60
 -15  11   3  250.17   16.70
  15  11  -3  252.17   15.90
  14 -11  -3   -9.20    4.70
  14 -11  -3    9.50    5.50
 -14 -11   3    0.60    4.10
 -14  11   3    4.10    4.70
 -14  11   3   -1.90    4.40
  14  11  -3   -2.80    3.70
 -13 -11   3    1.50    3.70
  13 -11  -3    2.70    4.70
  13 -11  -3    6.70    4.60
 -13  11   3    8.30    4.50
 -13  11   3   -0.80    4.20
  13  11  -3    5.70    3.50
  12 -11  -3   85.19    9.50
 -12 -11   3   87.49    8.50
  12 -11  -3   72.99    9.30
 -12  11   3   86.09    8.50
  12  11  -3   89.39    8.00
 -12  11   3   85.89    8.70
  11 -11  -3  233.38   15.50
  11 -11  -3  235.08   15.50
 -11 -11   3  252.17   15.00
 -11  11   3  263.77   15.10
 -11  11   3  255.97   15.10
  11  11  -3  223.48   14.60
  10 -11  -3   24.80    4.90
 -10 -11   3   25.40    4.40
  10 -11  -3   33.00    5.10
 -10  11   3   27.00    4.60
 -10  11   3   25.60    4.60
  10  11  -3   23.40    4.00
   9 -11  -3   66.89    7.30
   9 -11  -3   65.29    7.60
  -9 -11   3   63.69    6.80
   9  11  -3   55.79    6.40
  -9  11   3   55.69    6.70
  -9  11   3   65.09    7.00
   8 -11  -3   20.00    4.20
  -8 -11   3   19.00    3.60
   8 -11  -3   22.40    4.10
  -8  11   3   19.10    3.80
   8  11  -3   16.80    3.50
  -8  11   3   17.70    3.60
   7 -11  -3  167.18   11.30
   7 -11  -3  172.98   11.10
  -7  11   3  158.98   10.50
  -7  11   3  156.28   10.50
   6 -11  -3  380.86   21.90
  -6 -11   3  397.86   21.30
   6 -11  -3  390.16   21.50
  -6  11   3  404.46   21.50
   6  11  -3  389.86   21.00
  -6  11   3  410.56   21.40
  -5 -11   3    2.40    2.70
   5 -11  -3    7.60    3.10
   5 -11  -3   -6.90    2.80
   5  11  -3    0.50    2.30
  -5  11   3    4.70    2.80
   4 -11  -3  554.64   28.10
  -4 -11   3  531.95   27.80
   4 -11  -3  532.25   28.40
  -4  11   3  529.95   27.90
  -4  11   3  534.45   27.90
   4  11  -3  516.55   27.50
  -3 -11   3  137.29    8.90
   3 -11  -3  140.99    9.80
   3 -11  -3  134.29    9.70
  -3  11   3  143.99    9.70
  -3  11   3  134.39    9.00
   3  11  -3  135.49    8.50
   2 -11  -3  531.45   27.80
  -2 -11   3  515.75   27.10
  -2  11   3  533.75   27.40
   2  11  -3  511.75   26.90
   1 -11  -3   -2.70    2.80
  -1 -11   3    1.10    2.40
   1  11  -3   -0.30    2.00
  -1  11   3    1.30    2.50
   0 -11   3   19.30    3.10
   0 -11  -3   16.70    3.60
   0  11  -3   16.10    2.70
   0  11   3   16.20    3.20
   1 -11   3   65.09    5.90
  -1 -11  -3   57.49    6.40
   1  11   3   63.29    5.90
  -1  11  -3   63.09    5.30
   2 -11   3  421.86   22.20
  -2 -11  -3  398.96   22.40
  -2  11  -3  409.96   21.60
   2  11   3  418.56   22.10
  -3 -11  -3   26.20    4.10
   3 -11   3   21.40    3.70
  -3  11  -3   25.60    3.30
   3  11   3   26.30    3.90
   4 -11   3  130.09    9.00
  -4 -11  -3  123.19    9.20
  -4  11  -3  128.69    8.40
   4  11   3  127.69    8.90
  -5 -11  -3  787.22   40.90
   5 -11   3  807.52   40.80
  -5  11  -3  792.42   40.30
   5  11   3  772.42   40.50
  -6 -11  -3   40.30    5.00
   6 -11   3   35.20    4.80
  -6  11  -3   44.50    5.30
   6  11   3   32.80    4.60
   7 -11   3  480.65   26.30
  -7 -11  -3  501.25   26.50
  -7  11  -3  477.85   25.70
   7  11   3  481.95   26.10
   8 -11   3   14.10    4.30
  -8 -11  -3   15.20    4.20
   8  11   3   13.00    4.00
  -8  11  -3    9.00    3.50
  -9 -11  -3  241.18   15.60
   9 -11   3  222.68   14.60
  -9  11  -3  232.28   14.00
   9  11   3  220.28   15.70
 -10 -11  -3  133.79   11.10
  10 -11   3  135.79   10.90
 -10  11  -3  128.29   10.10
  10  11   3  130.09   10.50
  11 -11   3   47.10    6.30
 -11 -11  -3   50.49    6.40
 -11  11  -3   47.60    5.80
  11  11   3   46.80    6.20
  12 -11   3   69.69    7.60
  12 -11   3   70.29    7.90
 -12 -11  -3   59.49    7.10
  12  11   3   58.39    7.00
 -12  11  -3   44.30    7.10
 -12  11  -3   80.89    8.50
  13 -11   3  135.49   11.70
 -13 -11  -3  104.59   11.00
  13  11   3  112.19   11.00
 -13  11  -3  136.09   10.50
 -14 -11  -3   72.29    9.10
  14 -11   3   49.40    9.80
  14 -11   3   45.50    8.50
  14  11   3   49.70    7.00
 -14  11  -3   53.49    6.90
 -15 -11  -3  131.89   12.80
  15 -11   3  165.08   13.30
 -15  11  -3  152.18   12.90
  15  11   3  179.18   13.10
  16 -11   3    8.50    5.80
 -16 -11  -3   -1.20    5.20
  16  11   3    3.10    5.40
 -16  11  -3    1.80    5.10
  17 -11   3   93.29   11.20
 -17 -11  -3   56.59    8.40
  17  11   3   72.69    8.70
 -17  11  -3   83.79   10.90
  18 -11   3    3.60    6.80
 -18 -11  -3   -0.60    6.00
  18  11   3   -2.60    6.10
 -18  11  -3    7.90    6.40
  19 -11   3    0.90    8.30
 -19 -11  -3   -6.10    6.30
 -19  11  -3   18.60    7.00
  19  11   3    0.10    6.60
 -18 -12   3   -4.50    5.20
  18 -12  -3   17.20    8.30
  18  12  -3    7.50    5.50
 -17 -12   3  109.29   11.20
  17 -12  -3  102.39   11.90
  17  12  -3  112.49   10.70
  16 -12  -3   -1.60    6.30
 -16 -12   3   -0.70    4.50
 -16  12   3   -1.70    5.50
  16  12  -3   -9.70    4.40
 -16  12   3   -1.00    5.80
  15 -12  -3   32.10    7.20
  15 -12  -3   55.79    7.20
 -15 -12   3   40.40    6.20
 -15  12   3   50.19    6.80
 -15  12   3   43.60    6.60
  15  12  -3   37.40    6.00
  14 -12  -3  130.39   12.40
 -14 -12   3  113.29   10.60
  14 -12  -3  141.19   11.90
 -14  12   3  141.39   11.50
 -14  12   3  125.49   11.20
  14  12  -3  115.69   10.30
  13 -12  -3   10.60    5.20
 -13 -12   3    2.90    3.90
  13 -12  -3    5.10    5.10
 -13  12   3    4.70    4.40
  13  12  -3   -2.90    3.70
 -13  12   3   13.80    5.00
 -12 -12   3   10.80    4.30
  12 -12  -3    1.30    4.70
  12 -12  -3   12.40    4.90
 -12  12   3    7.60    4.50
 -12  12   3    2.00    4.40
  12  12  -3    9.60    3.80
 -11 -12   3    7.70    4.10
  11 -12  -3   17.30    4.80
  11 -12  -3    1.30    4.40
 -11  12   3   17.30    4.30
 -11  12   3    8.10    4.30
  11  12  -3    5.40    3.70
 -10 -12   3    0.70    3.50
  10 -12  -3   -0.80    4.10
  10 -12  -3    3.10    4.10
 -10  12   3   -0.50    3.60
 -10  12   3   -4.90    3.90
  10  12  -3   -3.10    3.30
  -9 -12   3   -1.10    3.30
   9 -12  -3    7.10    4.20
   9 -12  -3    1.90    3.80
  -9  12   3   -0.70    3.60
  -9  12   3    2.10    3.30
   9  12  -3   -0.60    3.10
  -8 -12   3   68.49    7.10
   8 -12  -3   77.49    8.30
   8 -12  -3   68.19    7.50
   8  12  -3   64.49    6.60
  -8  12   3   68.29    7.20
  -8  12   3   61.09    7.30
   7 -12  -3    2.50    3.60
   7 -12  -3    9.20    4.00
  -7 -12   3    5.50    3.10
   7  12  -3    7.60    3.10
  -7  12   3    7.50    3.30
  -7  12   3    6.70    3.20
  -6 -12   3  232.78   14.00
   6 -12  -3  238.98   14.40
   6 -12  -3  243.08   14.90
   6  12  -3  238.18   13.80
  -6  12   3  237.38   14.10
  -6  12   3  241.18   14.30
   5 -12  -3   72.39    7.50
  -5 -12   3   59.99    8.30
  -5  12   3   62.79    6.70
   4 -12  -3   11.30    3.80
   4 -12  -3   13.60    3.60
  -4 -12   3   11.40    3.30
   4  12  -3   11.00    3.00
  -4  12   3    6.40    3.30
  -4  12   3   11.30    3.30
  -3 -12   3    6.80    2.90
   3 -12  -3    5.20    4.00
   3 -12  -3    8.10    3.60
  -3  12   3    2.00    2.80
   3  12  -3    1.50    2.50
   2 -12  -3    1.20    3.20
  -2 -12   3    5.30    2.80
   2  12  -3    1.10    2.30
  -2  12   3    0.30    2.80
   1 -12  -3  147.99   10.40
  -1 -12   3  157.98    9.90
   1  12  -3  149.69    9.40
  -1  12   3  148.29    9.90
   0 -12   3  117.39    8.00
   0 -12  -3   86.89    8.30
   0  12  -3  101.89    7.20
   0  12   3   99.29    7.70
  -1 -12  -3 1084.39   55.79
   1 -12   3 1099.49   55.39
  -1  12  -3 1099.49   54.99
   1  12   3 1095.69   55.39
   2 -12   3    7.00    3.30
  -2 -12  -3    2.70    3.30
  -2  12  -3    6.90    2.70
   2  12   3    6.10    3.20
  -3 -12  -3  290.47   16.80
   3 -12   3  289.27   16.50
  -3  12  -3  285.47   15.90
   3  12   3  275.47   16.20
  -4 -12  -3  179.78   12.10
   4 -12   3  183.98   11.70
   4  12   3  173.68   11.60
  -4  12  -3  188.38   11.20
  -5 -12  -3  612.94   32.50
   5 -12   3  600.44   32.30
  -5  12  -3  626.24   31.90
   5  12   3  606.74   32.20
   6 -12   3    6.00    3.70
  -6 -12  -3    6.90    3.90
  -6  12  -3    9.30    3.10
   6  12   3   12.50    3.80
   7 -12   3    5.70    3.80
  -7 -12  -3   -2.10    3.50
   7  12   3    0.10    3.50
  -7  12  -3    0.90    3.00
   8 -12   3   23.30    4.80
   8  12   3   21.00    5.50
  -8  12  -3   24.70    4.50
  -9 -12  -3   11.90    4.40
   9  12   3    9.30    4.20
 -10 -12  -3    2.60    4.10
  10 -12   3    0.20    5.60
  10  12   3   -1.20    4.00
 -10  12  -3   -2.50    4.40
 -11 -12  -3   86.59    9.40
  11 -12   3   82.89    9.50
 -11  12  -3   85.29    8.90
  11  12   3   82.99    9.10
  12 -12   3  494.85   27.80
 -12 -12  -3  493.35   27.90
 -12  12  -3  507.45   27.20
  12  12   3  473.75   27.50
  13 -12   3   56.89    7.40
 -13 -12  -3   75.79    9.50
 -13  12  -3   57.19    7.00
  13  12   3   72.19    9.20
 -14 -12  -3  118.99   11.40
  14 -12   3  102.39   11.40
  14  12   3  118.09   11.00
 -14  12  -3  109.19   11.00
  15 -12   3   70.29    8.30
 -15 -12  -3   61.39    8.10
  15  12   3   65.39    8.10
 -15  12  -3   64.69    7.80
 -16 -12  -3   -0.20    5.10
  16 -12   3   -2.00    5.60
 -16  12  -3    5.10    5.60
  16  12   3   -8.40    5.20
 -17 -12  -3  122.09   12.40
  17 -12   3  131.59   13.00
  17  12   3  110.69   12.70
 -17  12  -3  123.79   12.60
  18 -12   3   14.40    6.80
 -18 -12  -3   24.40    6.70
  18  12   3   11.90    6.90
 -18  12  -3    7.30    7.00
 -18 -13   3    0.60    5.90
  18  13  -3   -1.30    5.90
 -17 -13   3    8.70    5.40
  17  13  -3    6.10    5.10
  16 -13  -3   -0.40    7.10
 -16 -13   3   -1.20    4.80
  16  13  -3   -2.50    4.50
 -15 -13   3    8.90    5.00
  15 -13  -3   -9.80    5.90
  15 -13  -3   -3.50    6.50
 -15  13   3   14.50    6.30
 -15  13   3   17.80    5.30
  15  13  -3   12.80    4.70
  14 -13  -3   -6.00    5.30
  14 -13  -3    8.80    6.20
 -14 -13   3    8.90    4.70
 -14  13   3    2.50    5.00
 -14  13   3   -1.50    5.30
  14  13  -3   -0.50    4.20
  13 -13  -3  261.27   17.20
  13 -13  -3  251.07   16.80
 -13 -13   3  242.38   15.90
 -13  13   3  257.67   16.60
 -13  13   3  241.68   16.00
  13  13  -3  233.18   15.60
  12 -13  -3    5.80    5.10
  12 -13  -3   17.70    5.30
 -12 -13   3   -0.20    4.00
 -12  13   3    2.40    4.70
  12  13  -3    3.80    4.00
 -12  13   3   -3.40    4.30
 -11 -13   3  525.15   29.30
  11 -13  -3  543.25   30.20
  11 -13  -3  541.55   29.70
 -11  13   3  564.34   29.40
 -11  13   3  542.35   29.60
  11  13  -3  527.25   29.00
 -10 -13   3   14.60    4.30
  10 -13  -3   16.10    4.70
  10 -13  -3   11.60    4.80
 -10  13   3    9.00    4.30
 -10  13   3   16.60    4.70
  10  13  -3   18.80    4.20
   9 -13  -3  951.40   49.90
   9 -13  -3 1001.40   49.50
  -9 -13   3  941.71   49.20
  -9  13   3  961.50   49.30
  -9  13   3  946.21   49.90
   9  13  -3  941.61   48.90
   8 -13  -3   12.00    4.20
  -8 -13   3   18.20    3.90
   8 -13  -3   12.40    4.70
   8  13  -3   16.70    3.80
  -8  13   3   10.90    3.70
  -8  13   3   10.30    4.20
   7 -13  -3  710.63   37.80
   7 -13  -3  721.13   37.20
  -7 -13   3  714.83   37.10
  -7  13   3  706.33   37.20
   7  13  -3  701.03   36.70
  -7  13   3  709.23   37.00
   6 -13  -3  105.69    9.50
  -6 -13   3  107.29    8.50
   6 -13  -3  112.19    9.80
   6  13  -3  109.29    8.20
  -6  13   3  111.59    8.80
  -6  13   3  108.09    9.00
  -5 -13   3  409.46   22.70
   5 -13  -3  425.06   23.60
   5  13  -3  406.36   22.40
  -5  13   3  432.86   22.90
   4 -13  -3  498.95   27.70
  -4 -13   3  509.25   27.00
   4 -13  -3  508.35   27.30
  -4  13   3  502.75   27.10
  -4  13   3  540.45   27.30
   4  13  -3  485.95   26.50
   3 -13  -3   20.10    4.40
  -3 -13   3   16.50    3.70
  -3  13   3   17.60    3.80
   3  13  -3   17.10    3.30
   2 -13  -3   11.20    3.90
  -2 -13   3   10.50    3.60
   2  13  -3   13.20    3.30
  -2  13   3   15.30    3.70
  -1 -13   3   15.40    5.90
   1 -13  -3   25.60    4.40
   1  13  -3   21.70    5.40
  -1  13   3   27.00    4.00
   0 -13  -3   -0.30    3.40
   0  13   3   -2.50    3.00
  -1 -13  -3   39.70    5.20
   1  13   3   43.50    5.00
  -2 -13  -3   18.40    4.40
   2  13   3   22.00    4.10
  -3 -13  -3   34.50    5.10
   3  13   3   30.00    4.60
  -4 -13  -3  254.07   16.10
   4  13   3  261.37   15.50
  -4  13  -3  257.17   16.80
   5 -13   3   92.49    9.70
  -5 -13  -3   87.19    8.80
   5  13   3   83.09    7.90
  -5  13  -3   73.09    7.50
   6 -13   3   83.89    8.10
  -6 -13  -3   61.69   10.60
  -6  13  -3   55.19    6.80
  -7 -13  -3  196.58   13.60
   7 -13   3  197.78   13.30
   7  13   3  198.88   13.10
  -7  13  -3  190.18   12.40
   8 -13   3  164.58   12.00
  -8 -13  -3  168.08   12.20
  -8  13  -3  150.68   11.10
   8  13   3  164.98   11.90
  -9 -13  -3    9.40    4.60
   9 -13   3   14.80    4.80
   9  13   3   17.90    4.60
  -9  13  -3   13.70    4.20
  10 -13   3   73.19    9.00
 -10 -13  -3   84.49    9.10
  10  13   3   78.59    8.70
 -10  13  -3   70.49    8.10
 -11 -13  -3  490.25   27.20
  11 -13   3  446.56   27.20
 -11  13  -3  473.35   26.50
  11  13   3  499.15   27.00
  12 -13   3   69.69    8.10
 -12 -13  -3   77.79    9.50
 -12  13  -3   70.79    8.90
  12  13   3   64.99    7.60
 -13 -13  -3  230.18   15.80
  13 -13   3  207.58   15.60
 -13  13  -3  226.08   15.00
  13  13   3  211.88   15.20
 -14 -13  -3   27.10    6.30
  14 -13   3   29.60    6.40
 -14  13  -3   35.20    6.10
  14  13   3   31.90    6.20
 -15 -13  -3   82.49   10.70
  15 -13   3   89.59   11.00
  15  13   3   96.59   11.00
 -15  13  -3  102.09   10.90
  16 -13   3    2.40    6.10
 -16 -13  -3    7.60    5.80
 -16  13  -3   13.00    6.00
  16  13   3    8.70    6.00
  17 -13   3   21.00    7.30
 -17 -13  -3   34.40    7.10
  17  13   3   27.40    6.80
 -17  13  -3   38.40    7.20
 -17 -14   3   90.89   12.00
  17  14  -3   92.79   11.60
 -16 -14   3    7.40    5.30
  16  14  -3    5.80    5.40
  15 -14  -3  536.95   29.70
 -15 -14   3  491.95   28.60
  15  14  -3  471.15   28.20
 -15  14   3  528.05   29.40
 -14 -14   3   -3.30    4.40
  14 -14  -3   -5.60    5.90
  14  14  -3    1.50    4.40
 -14  14   3    5.70    6.00
  13 -14  -3  166.88   14.30
 -13 -14   3  149.29   12.50
  13 -14  -3  190.18   14.30
  13  14  -3  164.18   12.20
 -13  14   3  170.28   13.90
  12 -14  -3   71.89    8.30
 -12 -14   3   64.69    8.50
  12 -14  -3   75.09    8.20
  12  14  -3   57.99    6.70
 -12  14   3   66.99    8.70
 -12  14   3   61.39    7.40
 -11 -14   3  133.39   10.60
  11 -14  -3  124.49   11.70
  11 -14  -3  114.99   12.00
 -11  14   3  103.49   11.20
 -11  14   3  119.69   10.50
  11  14  -3  143.59   10.20
  10 -14  -3  109.89   11.10
 -10 -14   3  111.29    9.80
  10 -14  -3  123.49   11.00
 -10  14   3  119.49   10.00
  10  14  -3  115.79    9.40
 -10  14   3  115.19   10.60
   9 -14  -3   95.79   10.60
  -9 -14   3   99.69    9.00
   9 -14  -3   95.39   10.10
  -9  14   3  117.29    9.20
   9  14  -3   99.39    8.80
  -9  14   3  107.89    9.90
   8 -14  -3   58.49    7.30
   8 -14  -3   65.09    8.60
  -8 -14   3   60.69    7.40
  -8  14   3   60.59    7.50
  -8  14   3   65.49    8.10
   8  14  -3   58.19    6.80
   7 -14  -3   37.70    5.50
  -7 -14   3   40.60    5.10
   7 -14  -3   32.40    5.80
   7  14  -3   32.90    4.70
  -7  14   3   36.70    5.10
  -7  14   3   34.40    5.50
   6 -14  -3  226.98   14.50
  -6 -14   3  208.38   13.70
   6 -14  -3  218.88   14.80
  -6  14   3  215.78   13.80
  -6  14   3  225.68   14.10
   6  14  -3  230.68   13.40
   5 -14  -3  136.19   10.30
  -5 -14   3  116.69    9.40
   5 -14  -3  127.19   10.70
  -5  14   3  119.69    9.80
  -5  14   3  130.79    9.50
   5  14  -3  114.09    8.80
  -4 -14   3   48.00    6.60
   4 -14  -3   58.69    7.90
  -4  14   3   54.59    7.20
   4  14  -3   46.40    5.10
  -3 -14   3   -3.70    3.20
   3 -14  -3    0.60    4.00
   3  14  -3   -0.30    2.80
  -3  14   3    2.50    3.60
  -2 -14   3    3.80    3.40
   2 -14  -3    0.90    3.90
   2  14  -3    2.60    2.90
  -2  14   3    3.30    3.50
  -1 -14   3   37.00    4.90
   1 -14  -3   38.30    5.60
  -1  14   3   40.10    5.10
   1  14  -3   36.90    4.40
   0 -14  -3   30.70    5.20
   0 -14   3   24.00    4.40
   0  14  -3   25.10    3.90
   0  14   3   30.10    4.70
   1 -14   3  330.17   18.90
  -1 -14  -3  334.07   19.40
  -1  14  -3  321.17   18.20
   1  14   3  329.47   18.80
  -2 -14  -3   -1.30    3.80
   2 -14   3   -1.00    3.50
  -2  14  -3   -4.70    2.80
   2  14   3   -3.10    3.40
   3 -14   3  593.84   30.30
   3  14   3  510.25   32.60
  -3  14  -3  568.54   29.60
   4 -14   3    7.20    3.80
  -4 -14  -3    8.50    4.50
  -4  14  -3    8.60    3.40
   4  14   3    6.20    3.90
  -5 -14  -3   15.10    4.70
   5 -14   3   15.60    4.20
   5  14   3   21.40    4.50
  -5  14  -3   15.80    3.90
   6 -14   3  205.28   13.80
  -6 -14  -3  223.18   14.20
  -6  14  -3  193.48   12.80
   6  14   3  205.08   13.50
  -7 -14  -3   29.50    5.20
   7 -14   3   13.50    4.50
   7  14   3   12.30    4.50
  -7  14  -3   15.70    4.10
  -8 -14  -3   -0.40    4.40
   8 -14   3    6.20    4.20
   8  14   3    9.60    4.30
  -8  14  -3    1.80    3.70
  -9 -14  -3    4.60    4.40
   9 -14   3    4.10    4.30
   9  14   3    3.00    4.20
  -9  14  -3   -2.70    3.90
  10 -14   3   35.90    5.90
 -10 -14  -3   27.60    5.50
 -10  14  -3   34.90    5.30
  10  14   3   28.60    5.50
 -11 -14  -3    0.50    4.50
  11 -14   3   -7.80    4.50
  11  14   3    1.70    4.50
 -11  14  -3   -3.30    4.10
 -12 -14  -3    4.80    5.00
  12 -14   3   -1.90    4.90
  12  14   3   -4.20    4.70
 -12  14  -3   -2.90    4.60
 -13 -14  -3   11.80    5.50
  13 -14   3   25.40    5.90
 -13  14  -3   22.90    5.40
  13  14   3   14.90    5.40
 -14 -14  -3    0.70    5.10
  14 -14   3    2.70    5.40
  14  14   3   -1.60    5.00
 -14  14  -3    2.70    5.20
 -15 -14  -3   92.29   11.40
  15 -14   3  115.39   11.90
 -15  14  -3   92.89   11.20
  15  14   3   87.09   11.20
 -16 -14  -3    4.40    6.10
  16 -14   3   26.80    6.80
  16  14   3   17.50    6.20
 -16  14  -3   13.20    5.90
  17 -14   3   43.40    7.80
 -17 -14  -3   48.90    8.30
  17  14   3   48.30    7.90
 -17  14  -3   39.20    7.90
 -16 -15   3    4.20    6.00
  16  15  -3    9.80    5.60
 -15 -15   3   25.30    6.10
  15  15  -3   29.70    6.10
 -15  15   3   41.00    7.70
 -14 -15   3   20.80    5.60
  14 -15  -3   19.70    8.60
 -14  15   3   19.20    7.20
  14  15  -3   13.60    5.10
 -13 -15   3  179.58   13.70
  13  15  -3  200.98   13.50
 -13  15   3  177.18   17.30
 -12 -15   3   -4.30    4.10
  12  15  -3    3.40    4.10
 -12  15   3   -2.30    9.60
 -11 -15   3  584.44   31.80
  11  15  -3  583.74   31.50
 -10 -15   3    1.00    4.00
  10 -15  -3    9.30    5.40
  10 -15  -3    2.10    6.20
  10  15  -3    0.00    3.70
  -9 -15   3  248.58   15.50
   9 -15  -3  259.27   17.30
   9 -15  -3  216.68   16.10
   9  15  -3  242.58   15.00
  -9  15   3  243.18   16.40
  -9  15   3  258.77   17.60
   8 -15  -3   15.20    5.20
   8 -15  -3    8.60    5.30
  -8 -15   3    5.90    4.00
  -8  15   3    5.50    3.90
  -8  15   3   10.40    4.70
   8  15  -3    4.10    3.40
  -7 -15   3  335.67   19.40
   7 -15  -3  316.97   20.30
   7 -15  -3  354.86   20.00
  -7  15   3  344.97   19.40
  -7  15   3  330.07   20.10
   7  15  -3  323.77   18.90
  -6 -15   3   41.80    5.60
   6 -15  -3   49.99    6.40
   6 -15  -3   49.20    6.70
   6  15  -3   51.99    6.30
  -6  15   3   41.90    6.20
  -6  15   3   55.69    7.40
   5 -15  -3   43.70    6.30
  -5 -15   3   35.50    5.20
   5 -15  -3   46.50    6.40
  -5  15   3   48.70    5.70
   5  15  -3   33.40    4.80
  -5  15   3   38.90    5.80
   4 -15  -3    5.00    4.70
  -4 -15   3    0.50    3.40
  -4  15   3    5.70    4.20
   4  15  -3    5.50    3.20
   3 -15  -3  196.38   14.20
  -3 -15   3  198.78   12.70
   3  15  -3  184.48   12.00
  -3  15   3  182.28   14.30
   2 -15  -3    3.70    5.50
  -2 -15   3    2.70    3.60
  -2  15   3   -0.20    6.30
   2  15  -3   -1.30    3.10
  -1 -15   3  310.87   18.00
   1  15  -3  312.07   17.30
  -1  15   3  280.97   21.50
   0 -15  -3  208.58   16.30
   0 -15   3  213.78   13.80
   0  15   3  218.78   14.00
   0  15  -3  217.88   13.10
   1 -15   3  243.18   15.30
  -1 -15  -3  241.88   15.80
   1  15   3  252.17   15.10
  -1  15  -3  232.78   14.30
  -2 -15  -3   23.90    5.30
   2 -15   3   36.70    5.20
  -2  15  -3   27.90    4.40
   2  15   3   24.30    4.80
   3 -15   3    2.00    3.80
  -3 -15  -3    2.20    4.40
   3  15   3   -0.10    4.00
  -3  15  -3    3.10    3.50
   4 -15   3   58.29    7.60
  -4 -15  -3   64.39    8.20
  -4  15  -3   53.69    6.70
   4  15   3   57.89    7.70
   5 -15   3  213.48   13.70
  -5 -15  -3  196.98   13.80
  -5  15  -3  196.18   12.70
   5  15   3  181.98   13.20
   6 -15   3   24.40    5.20
  -6 -15  -3   24.70    5.40
  -6  15  -3   22.10    4.40
   6  15   3   19.80    4.80
   7 -15   3   42.30    6.10
  -7 -15  -3   53.79    6.70
  -7  15  -3   48.30    5.70
   7  15   3   40.30    5.80
   8 -15   3    3.70    4.40
  -8 -15  -3    5.40    4.40
  -8  15  -3   -2.60    3.70
   8  15   3   -4.50    4.00
  -9 -15  -3    4.00    4.70
   9 -15   3    7.00    4.50
   9  15   3   -0.10    4.40
  -9  15  -3   -2.80    4.10
 -10 -15  -3   23.80    5.70
  10 -15   3   23.50    5.50
  10  15   3   23.10    5.30
 -10  15  -3   18.90    5.00
 -11 -15  -3   33.90    6.40
  11 -15   3   41.30    6.60
 -11  15  -3   48.30    6.40
  11  15   3   38.70    6.40
  12 -15   3   24.20    6.30
 -12 -15  -3   11.90    5.70
  12  15   3   31.10    5.90
 -12  15  -3   27.70    5.90
  13 -15   3  221.08   14.90
 -13 -15  -3  157.58   14.30
  13  15   3  194.68   14.50
 -13  15  -3  176.38   14.00
 -14 -15  -3   50.99    7.80
  14 -15   3   63.39    8.00
  14  15   3   50.09    7.70
 -14  15  -3   53.49    7.50
  15 -15   3   27.00    6.90
 -15 -15  -3   16.50    6.30
  15  15   3   23.30    6.50
 -15  15  -3   22.90    6.20
 -16 -15  -3  101.89   13.20
  16 -15   3  105.29   13.10
 -16  15  -3  154.48   13.20
  16  15   3  110.39   13.00
 -15 -16   3  499.75   29.30
  15  16  -3  499.45   28.70
 -14 -16   3   12.20    5.50
  14 -16  -3    3.60    6.80
 -14  16   3    6.70    6.60
  14  16  -3   15.80    5.40
  13 -16  -3  165.28   14.70
 -13 -16   3  140.89   12.20
 -13  16   3  153.88   13.90
  13  16  -3  141.49   12.00
  12 -16  -3  122.39   13.00
 -12 -16   3  108.69   10.70
  12  16  -3  121.89   10.60
 -12  16   3  143.39   12.50
  11 -16  -3  106.89   11.30
 -11 -16   3   70.59    9.30
 -11  16   3   75.19    8.80
  11  16  -3   85.89    8.60
 -10 -16   3  285.67   18.50
  10 -16  -3  314.97   20.00
 -10  16   3  322.37   19.40
  10  16  -3  308.57   18.20
  -9 -16   3   27.60    5.10
   9 -16  -3   24.00    5.90
   9  16  -3   21.70    4.70
  -9  16   3   35.80    6.00
  -8 -16   3   94.79    9.00
   8 -16  -3   77.79   10.50
   8  16  -3   85.59    8.30
  -8  16   3   81.09    9.60
   7 -16  -3   52.09    7.30
  -7 -16   3   49.80    6.20
  -7  16   3   52.09    6.80
   7  16  -3   53.29    5.90
   6 -16  -3  196.98   14.40
  -6 -16   3  186.58   13.00
  -6  16   3  196.98   13.80
   6  16  -3  192.98   12.50
   5 -16  -3   85.39    9.90
  -5 -16   3   87.19    8.40
  -5  16   3   90.69    9.30
   5  16  -3   83.89    7.70
  -4 -16   3   75.29    8.20
   4 -16  -3   83.09   10.20
  -4  16   3   87.49    9.10
   4  16  -3   86.79    7.80
   3 -16  -3   54.29    6.70
  -3 -16   3   38.60    5.50
  -3  16   3   40.40    5.80
   3  16  -3   37.40    4.90
   2 -16  -3    5.60    4.90
  -2 -16   3    0.50    3.60
  -2  16   3    7.70    4.00
   2  16  -3    0.80    3.20
  -1 -16   3   59.79    7.60
   1 -16  -3   73.39    9.10
   1  16  -3   50.89    6.60
  -1  16   3   49.40    6.20
   0 -16   3  175.68   12.50
   0 -16  -3  202.28   13.50
   0  16  -3  170.68   11.80
   0  16   3  183.78   12.50
   1 -16   3  244.18   15.30
  -1 -16  -3  221.58   15.60
  -1  16  -3  238.98   14.40
   1  16   3  239.08   15.10
   2 -16   3   50.09    6.30
  -2 -16  -3   53.49    7.00
  -2  16  -3   60.29    7.10
   2  16   3   63.79    6.70
   3 -16   3  170.68   12.20
  -3 -16  -3  169.48   13.10
   3  16   3  169.98   12.20
  -3  16  -3  162.38   11.50
   4 -16   3  102.99   10.10
  -4 -16  -3  127.59   11.00
   4  16   3  107.79   10.30
  -4  16  -3  118.29    9.40
  -5 -16  -3  119.89   10.60
   5 -16   3  102.49   10.10
  -5  16  -3  108.29    9.40
   5  16   3  108.69   10.00
   6 -16   3    2.50    4.30
  -6 -16  -3   -2.60    4.30
  -6  16  -3   -4.70    3.50
   6  16   3   11.50    4.40
  -7 -16  -3   36.60    6.10
   7 -16   3   35.60    5.70
  -7  16  -3   31.60    5.20
   7  16   3   40.20    6.20
  -8 -16  -3   86.59   10.00
   8 -16   3   92.39   10.10
   8  16   3   90.89    9.70
  -8  16  -3   85.49    9.00
  -9 -16  -3   -7.20    4.50
   9 -16   3   -3.50    4.50
   9  16   3   -4.80    4.60
  -9  16  -3    0.90    4.10
 -10 -16  -3   27.00    6.20
  10 -16   3   24.10    5.80
 -10  16  -3   22.00    5.30
  10  16   3   18.20    5.50
 -11 -16  -3    3.30    5.20
  11 -16   3    2.50    4.80
  11  16   3   -2.10    5.00
 -11  16  -3    0.60    4.80
 -12 -16  -3   80.39   10.30
  12 -16   3   85.89   11.00
 -12  16  -3   76.29   10.30
  12  16   3   90.49   10.60
 -13 -16  -3   -1.10    5.50
  13 -16   3    0.30    6.00
 -13  16  -3    1.40    5.50
  13  16   3   -5.20    5.30
 -14 -16  -3  250.67   18.20
  14 -16   3  271.37   18.10
  14  16   3  248.68   17.70
 -14  16  -3  241.28   17.50
 -15  16  -3   26.30    6.80
  15  16   3   22.00    7.00
  13 -17  -3  117.59   13.10
 -13 -17   3  111.29   11.40
  13  17  -3  108.99   10.80
 -13  17   3   97.69   10.60
  12 -17  -3   19.40    7.90
 -12 -17   3   10.30    5.10
  12  17  -3   14.60    5.10
 -12  17   3   24.50    6.50
 -11 -17   3   27.70    5.70
  11 -17  -3   40.20    7.00
  11  17  -3   32.10    5.70
 -11  17   3   28.40    6.60
 -10 -17   3    4.60    4.50
  10 -17  -3   15.90    6.10
  10  17  -3    9.50    4.50
 -10  17   3   13.90    5.90
  -9 -17   3   21.20    5.10
   9 -17  -3   20.20    6.00
  -9  17   3   22.10    5.80
   9  17  -3   20.20    4.70
   8 -17  -3   66.99    8.10
  -8 -17   3   61.99    8.40
   8  17  -3   52.99    6.30
  -8  17   3   66.69    7.60
   7 -17  -3  170.58   13.60
  -7 -17   3  178.18   12.50
  -7  17   3  164.68   13.10
   7  17  -3  159.28   11.70
  -6 -17   3  177.98   13.00
   6 -17  -3  171.18   14.10
  -6  17   3  198.78   13.70
   6  17  -3  182.48   12.30
   5 -17  -3   29.60    6.20
  -5 -17   3   19.70    4.90
  -5  17   3   27.90    5.60
   5  17  -3   27.80    4.60
  -4 -17   3   63.29    8.50
   4 -17  -3   71.69    8.20
   4  17  -3   75.59    7.80
  -4  17   3   73.59    9.10
  -3 -17   3  219.38   15.20
   3 -17  -3  262.27   16.50
  -3  17   3  240.68   15.60
   3  17  -3  230.88   14.60
   2 -17  -3  417.06   25.10
  -2 -17   3  435.16   24.30
   2  17  -3  427.96   23.60
  -2  17   3  432.16   24.30
  -1 -17   3  241.68   15.20
   1 -17  -3  224.88   15.80
  -1  17   3  232.68   15.20
   1  17  -3  230.98   14.30
   0 -17   3   46.80    6.30
   0 -17  -3   59.59    7.30
   0  17   3   50.89    6.40
   0  17  -3   61.39    7.00
  -1 -17  -3  215.58   14.90
   1 -17   3  201.48   14.00
  -1  17  -3  196.48   13.00
   1  17   3  198.08   13.80
   2 -17   3  261.67   16.30
  -2 -17  -3  256.47   17.20
   2  17   3  253.37   16.40
  -2  17  -3  259.07   15.60
  -3 -17  -3   29.00    5.80
   3 -17   3   30.20    5.60
  -3  17  -3   23.90    4.70
   3  17   3   18.30    5.10
  -4 -17  -3   73.69    9.70
   4 -17   3   76.69    9.10
  -4  17  -3   83.79    8.20
   4  17   3   87.19    9.20
  -5 -17  -3  445.06   26.10
   5 -17   3  437.26   25.80
  -5  17  -3  463.35   25.10
   5  17   3  453.85   25.70
   6 -17   3   27.40    5.80
  -6 -17  -3   41.60    6.80
   6  17   3   38.80    6.00
  -6  17  -3   29.70    5.30
   7 -17   3  238.88   16.30
  -7 -17  -3  241.58   16.70
  -7  17  -3  246.28   15.50
   7  17   3  234.48   16.00
   8 -17   3    3.30    4.80
  -8 -17  -3    3.10    5.10
   8  17   3   -0.70    4.80
  -8  17  -3    5.30    4.30
  -9 -17  -3   83.59   11.00
   9 -17   3   93.49   10.90
   9  17   3  102.09   10.70
  -9  17  -3  101.59    9.70
 -10 -17  -3   16.00    5.90
  10 -17   3   20.20    6.20
 -10  17  -3   31.20    5.80
  10  17   3   32.10    6.40
  11 -17   3   19.50    5.90
 -11 -17  -3   17.30    5.80
 -11  17  -3   31.00    5.90
  11  17   3   16.80    5.70
  12 -17   3   10.30    5.90
 -12 -17  -3   -3.10    5.30
  12  17   3   -0.40    5.30
 -12  17  -3    3.60    5.50
  13 -17   3    8.30    6.30
 -13 -17  -3    2.30    5.80
 -13  17  -3   15.70    6.00
  13  17   3   10.40    6.00
 -12 -18   3   -5.90    5.20
  12 -18  -3   -2.60    6.60
 -12  18   3    1.10    6.30
  12  18  -3   -9.90    4.90
  11 -18  -3   99.09   12.30
 -11 -18   3   66.99    8.40
 -11  18   3   91.49   11.60
  11  18  -3   84.39    9.60
 -10 -18   3   11.00    5.20
  10 -18  -3   15.70    6.40
 -10  18   3   19.50    6.30
  10  18  -3   18.30    5.10
   9 -18  -3   19.90    6.30
  -9 -18   3   23.70    5.40
   9  18  -3   22.30    5.10
  -9  18   3   21.60    5.90
  -8 -18   3   46.10    6.50
   8 -18  -3   47.00    7.40
   8  18  -3   49.10    6.30
  -8  18   3   49.10    7.00
  -7 -18   3   16.30    5.10
   7 -18  -3   17.20    6.00
   7  18  -3   24.50    4.80
  -7  18   3   17.00    5.70
   6 -18  -3  246.68   16.70
  -6 -18   3  221.68   15.10
   6  18  -3  210.58   14.50
  -6  18   3  225.08   15.70
  -5 -18   3    9.70    4.60
   5 -18  -3   16.40    5.40
  -5  18   3   14.20    5.00
   5  18  -3   11.20    4.40
  -4 -18   3    0.70    4.20
   4 -18  -3    9.80    5.60
  -4  18   3   10.80    5.20
   4  18  -3    4.40    4.00
  -3 -18   3   25.90    5.10
   3 -18  -3   21.30    5.80
   3  18  -3   23.60    4.50
  -3  18   3   18.70    5.50
  -2 -18   3   21.70    4.90
   2 -18  -3   23.60    5.80
  -2  18   3   11.10    4.90
   2  18  -3   17.00    4.30
  -1 -18   3  111.69   10.40
   1 -18  -3  123.49   11.40
  -1  18   3  117.79   10.90
   1  18  -3  119.29    9.60
   0 -18  -3   -6.10    4.70
   0 -18   3    0.60    4.40
   0  18   3    4.00    4.50
   0  18  -3   -3.50    3.50
  -1 -18  -3   -0.20    4.90
   1 -18   3   11.60    4.60
   1  18   3    7.40    4.50
  -1  18  -3    0.20    3.60
  -2 -18  -3    1.00    4.70
   2 -18   3   -0.80    4.40
   2  18   3    0.70    4.40
  -2  18  -3    0.90    3.80
  -3 -18  -3  329.77   20.90
   3 -18   3  341.67   20.70
  -3  18  -3  332.77   19.70
   3  18   3  336.07   20.30
  -4 -18  -3  105.19   11.10
   4 -18   3  112.09   11.00
  -4  18  -3  122.59    9.90
   4  18   3  116.59   10.70
   5 -18   3    4.30    4.80
  -5 -18  -3    0.90    5.00
   5  18   3    7.30    5.20
  -5  18  -3   -1.20    4.20
   6 -18   3  238.78   16.80
  -6 -18  -3  257.57   17.30
  -6  18  -3  251.37   16.00
   6  18   3  254.37   16.90
   7 -18   3   -5.30    4.70
  -7 -18  -3   -2.00    4.90
  -7  18  -3   12.00    4.80
   7  18   3    2.80    5.10
   8 -18   3  188.48   13.80
  -8 -18  -3  149.59   13.50
  -8  18  -3  147.89   12.40
   8  18   3  153.78   13.00
   9 -18   3   10.90    5.40
  -9 -18  -3    0.20    5.40
  -9  18  -3   14.80    5.10
   9  18   3    8.40    5.60
 -10 -18  -3  283.27   19.70
  10 -18   3  284.47   19.60
  10  18   3  317.27   19.50
 -10  18  -3  285.77   18.90
 -11 -18  -3   16.90    6.00
  11 -18   3   13.50    6.10
 -11  18  -3   15.60    5.50
  11  18   3    8.10    6.00
 -12 -18  -3  148.69   14.10
  12 -18   3  141.09   14.20
 -12  18  -3  136.79   13.70
[truncated: 1,878,574 more chars]
