# Supplementary material
Source: MDPI journal article supplement (https://www.mdpi.com/2304-6740/5/4/73)
Supplement: s1 [file s1 › inorganics-233055-Supplementary/FF401_2_0m_a_sq.cif]

 
data_FF401_2_0m_a_sq
 
_audit_creation_method            'SHELXL-2014/7'
_shelx_SHELXL_version_number      '2014/7'
_chemical_name_systematic         ?
_chemical_name_common             ?
_chemical_melting_point           ?
_chemical_formula_moiety          ?
_chemical_formula_sum
 'C69 H45 Cl2 F18 N3 P4 Ru' 
_chemical_formula_weight          1553.93

loop_
 _atom_type_symbol
 _atom_type_description
 _atom_type_scat_dispersion_real
 _atom_type_scat_dispersion_imag
 _atom_type_scat_source
 'C'  'C'   0.0033   0.0016
 'International Tables Vol C Tables 4.2.6.8 and 6.1.1.4'
 'H'  'H'   0.0000   0.0000
 'International Tables Vol C Tables 4.2.6.8 and 6.1.1.4'
 'N'  'N'   0.0061   0.0033
 'International Tables Vol C Tables 4.2.6.8 and 6.1.1.4'
 'F'  'F'   0.0171   0.0103
 'International Tables Vol C Tables 4.2.6.8 and 6.1.1.4'
 'P'  'P'   0.1023   0.0942
 'International Tables Vol C Tables 4.2.6.8 and 6.1.1.4'
 'Cl'  'Cl'   0.1484   0.1585
 'International Tables Vol C Tables 4.2.6.8 and 6.1.1.4'
 'Ru'  'Ru'  -1.2594   0.8363
 'International Tables Vol C Tables 4.2.6.8 and 6.1.1.4'
 
_space_group_crystal_system       monoclinic
_space_group_IT_number            15
_space_group_name_H-M_alt         'C 2/c'
_space_group_name_Hall            '-C 2yc'
 
_shelx_space_group_comment
;
The symmetry employed for this shelxl refinement is uniquely defined
by the following loop, which should always be used as a source of
symmetry information in preference to the above space-group names.
They are only intended as comments.
;
 
loop_
 _space_group_symop_operation_xyz
 'x, y, z'
 '-x, y, -z+1/2'
 'x+1/2, y+1/2, z'
 '-x+1/2, y+1/2, -z+1/2'
 '-x, -y, -z'
 'x, -y, z-1/2'
 '-x+1/2, -y+1/2, -z'
 'x+1/2, -y+1/2, z-1/2'
 
_cell_length_a                    21.594(3)
_cell_length_b                    27.753(4)
_cell_length_c                    23.938(3)
_cell_angle_alpha                 90
_cell_angle_beta                  93.631(3)
_cell_angle_gamma                 90
_cell_volume                      14317(3)
_cell_formula_units_Z             8
_cell_measurement_temperature     150(2)
_cell_measurement_reflns_used     5093
_cell_measurement_theta_min       2.5632
_cell_measurement_theta_max       25.0081
 
_exptl_crystal_description        plate
_exptl_crystal_colour             'pale yellow'
_exptl_crystal_density_meas       ?
_exptl_crystal_density_method     ?
_exptl_crystal_density_diffrn     1.442          
_exptl_crystal_F_000              6240
_exptl_transmission_factor_min    ?
_exptl_transmission_factor_max    ?
_exptl_crystal_size_max           0.191
_exptl_crystal_size_mid           0.094
_exptl_crystal_size_min           0.047
_exptl_absorpt_coefficient_mu     0.472
_shelx_estimated_absorpt_T_min    0.854
_shelx_estimated_absorpt_T_max    0.927
_exptl_absorpt_correction_type    multi-scan
_exptl_absorpt_correction_T_min   0.65
_exptl_absorpt_correction_T_max   0.93
_exptl_absorpt_process_details    'SADABS V2014/5 (Bruker AXS Inc.)'
_exptl_absorpt_special_details    ?
_diffrn_ambient_temperature       150(2)
_diffrn_radiation_wavelength      0.71073
_diffrn_radiation_type            MoK\a
_diffrn_source                    'sealed tube'
_diffrn_measurement_device_type   'Bruker D8 Quest ECO PHOTON 50'
_diffrn_measurement_method        ?
_diffrn_detector_area_resol_mean  ?
_diffrn_reflns_number             27253
_diffrn_reflns_av_unetI/netI      0.1337
_diffrn_reflns_av_R_equivalents   0.0965
_diffrn_reflns_limit_h_min        -25
_diffrn_reflns_limit_h_max        18
_diffrn_reflns_limit_k_min        -27
_diffrn_reflns_limit_k_max        33
_diffrn_reflns_limit_l_min        -28
_diffrn_reflns_limit_l_max        28
_diffrn_reflns_theta_min          2.396
_diffrn_reflns_theta_max          25.135
_diffrn_reflns_theta_full         25.135
_diffrn_measured_fraction_theta_max   0.964
_diffrn_measured_fraction_theta_full  0.964
_diffrn_reflns_Laue_measured_fraction_max    0.964
_diffrn_reflns_Laue_measured_fraction_full   0.964
_diffrn_reflns_point_group_measured_fraction_max   0.964
_diffrn_reflns_point_group_measured_fraction_full  0.964
_reflns_number_total              12332
_reflns_number_gt                 7365
_reflns_threshold_expression      'I > 2\s(I)'
_reflns_Friedel_coverage          0.000
_reflns_Friedel_fraction_max      .
_reflns_Friedel_fraction_full     . 
_reflns_special_details
;
 Reflections were merged by SHELXL according to the crystal
 class for the calculation of statistics and refinement.
 
 Structure factors included contributions from the .fab file.
 
 _reflns_Friedel_fraction is defined as the number of unique
 Friedel pairs measured divided by the number that would be
 possible theoretically, ignoring centric projections and
 systematic absences.
;
 
_computing_data_collection        ?
_computing_cell_refinement        ?
_computing_data_reduction         ?
_computing_structure_solution     ?
_computing_structure_refinement 'SHELXL-2014/7 (Sheldrick, 2014)'
_computing_molecular_graphics     ?
_computing_publication_material   ?
_refine_special_details           ?
_refine_ls_structure_factor_coef  Fsqd
_refine_ls_matrix_type            full
_refine_ls_weighting_scheme       calc
_refine_ls_weighting_details
'w=1/[\s^2^(Fo^2^)+(0.1000P)^2^] where P=(Fo^2^+2Fc^2^)/3'
_atom_sites_solution_primary      ?
_atom_sites_solution_secondary    ?
_atom_sites_solution_hydrogens    geom
_refine_ls_hydrogen_treatment     constr
_refine_ls_extinction_method      none
_refine_ls_extinction_coef        .
_refine_ls_number_reflns          12329
_refine_ls_number_parameters      877
_refine_ls_number_restraints      0
_refine_ls_R_factor_all           0.1275
_refine_ls_R_factor_gt            0.0715
_refine_ls_wR_factor_ref          0.1975
_refine_ls_wR_factor_gt           0.1777
_refine_ls_goodness_of_fit_ref    1.053
_refine_ls_restrained_S_all       1.053
_refine_ls_shift/su_max           0.015
_refine_ls_shift/su_mean          0.000
 
loop_
 _atom_site_label
 _atom_site_type_symbol
 _atom_site_fract_x
 _atom_site_fract_y
 _atom_site_fract_z
 _atom_site_U_iso_or_equiv
 _atom_site_adp_type
 _atom_site_occupancy
 _atom_site_site_symmetry_order  
 _atom_site_calc_flag
 _atom_site_refinement_flags_posn
 _atom_site_refinement_flags_adp
 _atom_site_refinement_flags_occupancy
 _atom_site_disorder_assembly
 _atom_site_disorder_group
Ru1 Ru 0.25164(2) 0.48774(2) 0.48732(2) 0.01510(16) Uani 1 1 d . . . . .
Cl2 Cl 0.17845(7) 0.47370(6) 0.55967(7) 0.0211(4) Uani 1 1 d . . . . .
Cl1 Cl 0.34406(7) 0.48855(7) 0.55482(7) 0.0248(4) Uani 1 1 d . . . . .
P4 P 0.17236(7) 0.47957(7) 0.42552(7) 0.0160(4) Uani 1 1 d . . . . .
P1 P 0.25568(8) 0.40457(6) 0.48853(7) 0.0177(4) Uani 1 1 d . . . . .
P2 P 0.20984(8) 0.56491(6) 0.49816(7) 0.0174(4) Uani 1 1 d . . . . .
P3 P 0.30900(7) 0.50470(7) 0.41518(7) 0.0184(4) Uani 1 1 d . . . . .
N3 N 0.2610(2) 0.5019(2) 0.3547(2) 0.0203(13) Uani 1 1 d . . . . .
F2 F 0.2153(3) 0.5941(2) 0.77855(19) 0.0636(16) Uani 1 1 d . . . . .
N1 N 0.1873(2) 0.3856(2) 0.4563(2) 0.0175(12) Uani 1 1 d . . . . .
F13 F 0.5752(2) 0.3835(3) 0.3847(2) 0.0702(19) Uani 1 1 d . . . . .
N2 N 0.1334(2) 0.5591(2) 0.4740(2) 0.0182(12) Uani 1 1 d . . . . .
F3 F 0.1958(3) 0.6647(2) 0.7522(2) 0.078(2) Uani 1 1 d . . . . .
F14 F 0.5259(3) 0.3621(3) 0.3086(3) 0.082(2) Uani 1 1 d . . . . .
F15 F 0.5700(3) 0.4292(3) 0.3132(3) 0.089(2) Uani 1 1 d . . . . .
C33 C 0.2769(3) 0.6052(3) 0.6539(3) 0.0256(17) Uani 1 1 d . . . . .
H33 H 0.3168 0.6117 0.6713 0.031 Uiso 1 1 calc R U . . .
C23 C 0.2110(4) 0.5294(3) 0.2119(3) 0.0283(18) Uani 1 1 d . . . . .
H23 H 0.1722 0.5340 0.1916 0.034 Uiso 1 1 calc R U . . .
F1 F 0.2879(3) 0.6409(3) 0.7592(2) 0.090(3) Uani 1 1 d . . . . .
C27 C 0.2715(3) 0.5130(3) 0.2993(3) 0.0194(14) Uani 1 1 d . . . . .
C24 C 0.2643(4) 0.5316(3) 0.1857(3) 0.0336(19) Uani 1 1 d . . . . .
H24 H 0.2629 0.5384 0.1468 0.040 Uiso 1 1 calc R U . . .
C34 C 0.2700(3) 0.5901(3) 0.5976(3) 0.0245(16) Uani 1 1 d . . . . .
H34 H 0.3057 0.5847 0.5772 0.029 Uiso 1 1 calc R U . . .
C11 C 0.1123(3) 0.3889(3) 0.3844(3) 0.0226(16) Uani 1 1 d . . . . .
C20 C 0.1659(3) 0.5139(3) 0.3088(3) 0.0227(15) Uani 1 1 d . . . . .
C22 C 0.2138(3) 0.5201(3) 0.2705(3) 0.0221(16) Uani 1 1 d . . . . .
C28 C 0.2116(3) 0.5831(3) 0.5720(3) 0.0218(15) Uani 1 1 d . . . . .
C19 C 0.1950(3) 0.5022(2) 0.3590(3) 0.0168(15) Uani 1 1 d . . . . .
C49 C 0.3133(3) 0.3691(3) 0.4541(3) 0.0203(15) Uani 1 1 d . . . . .
C18 C 0.1668(3) 0.3380(3) 0.4457(3) 0.0214(16) Uani 1 1 d . . . . .
C10 C 0.1517(3) 0.4167(3) 0.4179(3) 0.0210(15) Uani 1 1 d . . . . .
F11 F 0.5048(3) 0.2836(3) 0.4052(3) 0.106(3) Uani 1 1 d . . . . .
C42 C 0.2551(3) 0.3762(3) 0.5575(3) 0.0252(17) Uani 1 1 d . . . . .
C21 C 0.0990(3) 0.5224(3) 0.2937(3) 0.035(2) Uani 1 1 d . . . . .
H21A H 0.0836 0.4978 0.2670 0.053 Uiso 1 1 calc R U . . .
H21B H 0.0936 0.5543 0.2767 0.053 Uiso 1 1 calc R U . . .
H21C H 0.0757 0.5207 0.3275 0.053 Uiso 1 1 calc R U . . .
C57 C 0.3706(3) 0.4345(3) 0.3552(3) 0.0259(17) Uani 1 1 d . . . . .
H57 H 0.3309 0.4270 0.3383 0.031 Uiso 1 1 calc R U . . .
C31 C 0.2244(3) 0.6105(3) 0.6830(3) 0.0270(17) Uani 1 1 d . . . . .
C29 C 0.1595(3) 0.5872(3) 0.6031(3) 0.0272(17) Uani 1 1 d . . . . .
H29 H 0.1193 0.5807 0.5863 0.033 Uiso 1 1 calc R U . . .
C35 C 0.2252(3) 0.6215(3) 0.4623(3) 0.0256(17) Uani 1 1 d . . . . .
C58 C 0.4228(3) 0.4104(3) 0.3382(3) 0.0288(17) Uani 1 1 d . . . . .
H58 H 0.4188 0.3861 0.3103 0.035 Uiso 1 1 calc R U . . .
C9 C 0.0842(3) 0.5903(3) 0.4808(3) 0.0219(16) Uani 1 1 d . . . . .
C13 C 0.1200(3) 0.3400(3) 0.4005(3) 0.0238(16) Uani 1 1 d . . . . .
C4 C 0.0299(3) 0.5666(3) 0.4610(3) 0.0253(16) Uani 1 1 d . . . . .
C2 C 0.0467(3) 0.5214(3) 0.4386(3) 0.0207(15) Uani 1 1 d . . . . .
C64 C 0.3778(3) 0.5794(3) 0.4641(3) 0.0284(17) Uani 1 1 d . . . . .
H64 H 0.3816 0.5583 0.4954 0.034 Uiso 1 1 calc R U . . .
C30 C 0.1666(3) 0.6007(3) 0.6581(3) 0.0294(18) Uani 1 1 d . . . . .
H30 H 0.1311 0.6035 0.6794 0.035 Uiso 1 1 calc R U . . .
C16 C 0.1566(3) 0.2538(3) 0.4509(3) 0.0323(19) Uani 1 1 d . . . . .
H16 H 0.1681 0.2239 0.4678 0.039 Uiso 1 1 calc R U . . .
C36 C 0.2606(4) 0.6585(3) 0.4854(4) 0.041(2) Uani 1 1 d . . . . .
H36 H 0.2822 0.6538 0.5207 0.049 Uiso 1 1 calc R U . . .
C26 C 0.3266(3) 0.5156(3) 0.2720(3) 0.0273(17) Uani 1 1 d . . . . .
H26 H 0.3657 0.5117 0.2920 0.033 Uiso 1 1 calc R U . . .
C50 C 0.2980(4) 0.3399(3) 0.4083(3) 0.0316(18) Uani 1 1 d . . . . .
H50 H 0.2571 0.3408 0.3912 0.038 Uiso 1 1 calc R U . . .
C25 C 0.3223(3) 0.5239(3) 0.2150(3) 0.0291(18) Uani 1 1 d . . . . .
H25 H 0.3591 0.5244 0.1952 0.035 Uiso 1 1 calc R U . . .
C1 C 0.1095(3) 0.5170(3) 0.4455(3) 0.0208(15) Uani 1 1 d . . . . .
C56 C 0.3761(3) 0.4692(3) 0.3962(3) 0.0222(16) Uani 1 1 d . . . . .
C17 C 0.1849(3) 0.2955(3) 0.4698(3) 0.0268(17) Uani 1 1 d . . . . .
H17 H 0.2166 0.2947 0.4992 0.032 Uiso 1 1 calc R U . . .
C54 C 0.3755(3) 0.3711(3) 0.4756(3) 0.0289(18) Uani 1 1 d . . . . .
H54 H 0.3881 0.3932 0.5044 0.035 Uiso 1 1 calc R U . . .
C47 C 0.3052(4) 0.3512(3) 0.6445(3) 0.042(2) Uani 1 1 d . . . . .
H47 H 0.3422 0.3475 0.6678 0.050 Uiso 1 1 calc R U . . .
C41 C 0.1952(4) 0.6295(3) 0.4082(3) 0.0332(19) Uani 1 1 d . . . . .
H41 H 0.1714 0.6045 0.3902 0.040 Uiso 1 1 calc R U . . .
C63 C 0.3433(3) 0.5652(3) 0.4161(3) 0.0219(16) Uani 1 1 d . . . . .
C59 C 0.4802(3) 0.4225(3) 0.3625(3) 0.0341(19) Uani 1 1 d . . . . .
C12 C 0.0699(3) 0.4042(3) 0.3354(3) 0.0328(19) Uani 1 1 d . . . . .
H12A H 0.0700 0.4395 0.3325 0.049 Uiso 1 1 calc R U . . .
H12B H 0.0277 0.3930 0.3407 0.049 Uiso 1 1 calc R U . . .
H12C H 0.0844 0.3903 0.3009 0.049 Uiso 1 1 calc R U . . .
C8 C 0.0826(3) 0.6368(3) 0.5024(3) 0.0304(18) Uani 1 1 d . . . . .
H8 H 0.1197 0.6526 0.5155 0.036 Uiso 1 1 calc R U . . .
C43 C 0.1984(3) 0.3626(3) 0.5783(3) 0.0317(18) Uani 1 1 d . . . . .
H43 H 0.1609 0.3676 0.5560 0.038 Uiso 1 1 calc R U . . .
C7 C 0.0264(3) 0.6591(3) 0.5044(3) 0.0346(19) Uani 1 1 d . . . . .
H7 H 0.0244 0.6908 0.5191 0.041 Uiso 1 1 calc R U . . .
C48 C 0.3088(3) 0.3713(3) 0.5915(3) 0.0289(18) Uani 1 1 d . . . . .
H48 H 0.3476 0.3814 0.5790 0.035 Uiso 1 1 calc R U . . .
C15 C 0.1109(4) 0.2552(3) 0.4071(4) 0.041(2) Uani 1 1 d . . . . .
H15 H 0.0920 0.2259 0.3943 0.049 Uiso 1 1 calc R U . . .
C14 C 0.0928(3) 0.2972(3) 0.3821(3) 0.0346(19) Uani 1 1 d . . . . .
H14 H 0.0617 0.2973 0.3522 0.042 Uiso 1 1 calc R U . . .
C44 C 0.1963(4) 0.3422(3) 0.6307(3) 0.044(2) Uani 1 1 d . . . . .
H44 H 0.1580 0.3318 0.6440 0.053 Uiso 1 1 calc R U . . .
C69 C 0.3353(3) 0.5979(3) 0.3716(3) 0.0314(19) Uani 1 1 d . . . . .
H69 H 0.3093 0.5897 0.3395 0.038 Uiso 1 1 calc R U . . .
C45 C 0.2512(4) 0.3370(3) 0.6639(3) 0.040(2) Uani 1 1 d . . . . .
C62 C 0.4349(3) 0.4789(3) 0.4215(3) 0.0326(19) Uani 1 1 d . . . . .
H62 H 0.4393 0.5019 0.4509 0.039 Uiso 1 1 calc R U . . .
F12 F 0.4443(4) 0.2707(3) 0.3356(4) 0.121(3) Uani 1 1 d . . . . .
C5 C -0.0274(3) 0.5896(3) 0.4633(3) 0.0302(18) Uani 1 1 d . . . . .
H5 H -0.0648 0.5740 0.4503 0.036 Uiso 1 1 calc R U . . .
F10 F 0.4369(4) 0.2300(3) 0.4077(5) 0.137(4) Uani 1 1 d . . . . .
C53 C 0.4178(3) 0.3398(4) 0.4538(4) 0.043(2) Uani 1 1 d . . . . .
H53 H 0.4595 0.3396 0.4690 0.052 Uiso 1 1 calc R U . . .
C51 C 0.3417(4) 0.3091(3) 0.3869(4) 0.041(2) Uani 1 1 d . . . . .
H51 H 0.3303 0.2886 0.3561 0.050 Uiso 1 1 calc R U . . .
C6 C -0.0284(4) 0.6358(3) 0.4848(4) 0.042(2) Uani 1 1 d . . . . .
H6 H -0.0670 0.6521 0.4864 0.051 Uiso 1 1 calc R U . . .
C61 C 0.4857(3) 0.4560(3) 0.4045(3) 0.036(2) Uani 1 1 d . . . . .
H61 H 0.5255 0.4631 0.4219 0.043 Uiso 1 1 calc R U . . .
C3 C 0.0002(3) 0.4857(3) 0.4138(3) 0.0297(17) Uani 1 1 d . . . . .
H3A H -0.0063 0.4914 0.3734 0.045 Uiso 1 1 calc R U . . .
H3B H -0.0392 0.4897 0.4314 0.045 Uiso 1 1 calc R U . . .
H3C H 0.0158 0.4530 0.4203 0.045 Uiso 1 1 calc R U . . .
C65 C 0.4070(4) 0.6243(4) 0.4671(4) 0.045(2) Uani 1 1 d . . . . .
H65 H 0.4301 0.6338 0.5003 0.054 Uiso 1 1 calc R U . . .
C52 C 0.4003(4) 0.3086(3) 0.4099(4) 0.044(2) Uani 1 1 d . . . . .
C32 C 0.2317(4) 0.6272(3) 0.7432(3) 0.0335(19) Uani 1 1 d . . . . .
C60 C 0.5373(4) 0.3988(4) 0.3419(4) 0.050(3) Uani 1 1 d . . . . .
F17 F 0.4834(5) 0.7044(4) 0.4486(6) 0.204(7) Uani 1 1 d . . . . .
C68 C 0.3649(4) 0.6417(3) 0.3744(3) 0.038(2) Uani 1 1 d . . . . .
H68 H 0.3602 0.6637 0.3440 0.045 Uiso 1 1 calc R U . . .
F4 F 0.1927(5) 0.7842(3) 0.3919(5) 0.139(4) Uani 1 1 d . . . . .
C40 C 0.2006(4) 0.6730(4) 0.3823(4) 0.050(3) Uani 1 1 d . . . . .
H40 H 0.1800 0.6782 0.3466 0.060 Uiso 1 1 calc R U . . .
C66 C 0.4022(4) 0.6537(3) 0.4227(4) 0.043(2) Uani 1 1 d . . . . .
C37 C 0.2657(5) 0.7020(4) 0.4590(4) 0.057(3) Uani 1 1 d . . . . .
H37 H 0.2901 0.7270 0.4764 0.068 Uiso 1 1 calc R U . . .
F6 F 0.2832(5) 0.7868(3) 0.4064(4) 0.127(3) Uani 1 1 d . . . . .
C38 C 0.2361(6) 0.7097(3) 0.4080(4) 0.067(3) Uani 1 1 d . . . . .
F9 F 0.2782(7) 0.3330(5) 0.7566(3) 0.210(7) Uani 1 1 d . . . . .
C55 C 0.4465(5) 0.2730(5) 0.3899(6) 0.077(4) Uani 1 1 d . . . . .
F5 F 0.2488(10) 0.7571(3) 0.3326(3) 0.288(11) Uani 1 1 d . . . . .
F8 F 0.2627(9) 0.2712(4) 0.7210(4) 0.227(8) Uani 1 1 d . . . . .
F18 F 0.4319(9) 0.7253(5) 0.3834(5) 0.276(11) Uani 1 1 d . . . . .
F7 F 0.1943(5) 0.3122(6) 0.7375(4) 0.206(7) Uani 1 1 d . . . . .
C46 C 0.2489(7) 0.3153(5) 0.7189(4) 0.071(3) Uani 1 1 d . . . . .
C67 C 0.4351(9) 0.7021(5) 0.4224(6) 0.101(6) Uani 1 1 d . . . . .
C39 C 0.2406(10) 0.7574(5) 0.3786(6) 0.102(5) Uani 1 1 d . . . . .
F16 F 0.4114(9) 0.7295(5) 0.4621(11) 0.283(11) Uani 1 1 d . . . . .
 
loop_
 _atom_site_aniso_label
 _atom_site_aniso_U_11
 _atom_site_aniso_U_22
 _atom_site_aniso_U_33
 _atom_site_aniso_U_23
 _atom_site_aniso_U_13
 _atom_site_aniso_U_12
Ru1 0.0148(3) 0.0151(3) 0.0153(3) 0.0000(2) 0.00020(19) -0.0020(2)
Cl2 0.0198(8) 0.0232(10) 0.0203(8) 0.0001(7) 0.0014(7) -0.0042(7)
Cl1 0.0220(8) 0.0299(10) 0.0220(8) -0.0013(8) -0.0028(7) -0.0037(8)
P4 0.0142(8) 0.0180(10) 0.0160(8) 0.0001(7) 0.0006(6) -0.0001(7)
P1 0.0181(8) 0.0160(9) 0.0189(8) 0.0009(8) 0.0000(7) -0.0006(8)
P2 0.0184(9) 0.0142(10) 0.0196(9) -0.0012(7) 0.0014(7) -0.0033(7)
P3 0.0144(8) 0.0246(11) 0.0160(8) -0.0001(8) -0.0007(7) -0.0035(7)
N3 0.017(3) 0.028(4) 0.015(3) 0.003(2) -0.005(2) -0.002(2)
F2 0.125(5) 0.042(3) 0.025(2) 0.004(2) 0.016(3) -0.012(3)
N1 0.018(3) 0.016(3) 0.017(3) 0.003(2) -0.001(2) 0.005(2)
F13 0.027(3) 0.117(6) 0.066(4) -0.002(4) 0.001(2) 0.037(3)
N2 0.012(3) 0.019(3) 0.024(3) -0.002(3) 0.006(2) -0.004(2)
F3 0.141(6) 0.051(4) 0.039(3) -0.020(3) -0.012(3) 0.041(4)
F14 0.049(3) 0.112(6) 0.086(4) -0.043(4) 0.007(3) 0.037(4)
F15 0.051(3) 0.101(6) 0.122(5) 0.045(5) 0.054(4) 0.024(3)
C33 0.028(4) 0.030(5) 0.019(4) -0.007(3) -0.003(3) -0.003(3)
C23 0.040(4) 0.027(4) 0.018(4) 0.004(3) -0.004(3) 0.005(3)
F1 0.071(4) 0.160(8) 0.038(3) -0.045(4) 0.003(3) -0.037(4)
C27 0.027(3) 0.016(4) 0.015(3) -0.003(3) -0.003(3) 0.000(3)
C24 0.045(5) 0.036(5) 0.020(4) 0.004(4) -0.001(3) 0.001(4)
C34 0.028(4) 0.025(4) 0.021(4) -0.003(3) 0.009(3) -0.002(3)
C11 0.018(3) 0.030(4) 0.020(4) 0.000(3) 0.000(3) -0.001(3)
C20 0.024(3) 0.020(4) 0.024(4) -0.003(3) 0.001(3) -0.003(3)
C22 0.030(4) 0.016(4) 0.020(4) -0.001(3) 0.001(3) -0.003(3)
C28 0.025(4) 0.017(4) 0.023(4) -0.005(3) -0.002(3) -0.002(3)
C19 0.014(3) 0.014(4) 0.023(3) -0.006(3) 0.003(3) 0.000(3)
C49 0.018(3) 0.018(4) 0.025(4) 0.003(3) 0.003(3) -0.002(3)
C18 0.017(3) 0.027(4) 0.020(3) 0.001(3) -0.001(3) -0.001(3)
C10 0.026(4) 0.018(4) 0.019(3) -0.001(3) 0.007(3) 0.002(3)
F11 0.048(4) 0.119(7) 0.153(7) -0.008(5) 0.037(4) 0.038(4)
C42 0.043(4) 0.013(4) 0.021(4) -0.002(3) 0.004(3) 0.006(3)
C21 0.032(4) 0.035(5) 0.038(4) 0.013(4) -0.006(3) 0.003(4)
C57 0.024(4) 0.028(5) 0.025(4) -0.003(3) -0.002(3) -0.002(3)
C31 0.043(4) 0.014(4) 0.024(4) -0.007(3) 0.003(3) -0.003(3)
C29 0.026(4) 0.030(5) 0.026(4) 0.001(3) 0.007(3) -0.003(3)
C35 0.030(4) 0.021(4) 0.026(4) 0.000(3) 0.004(3) 0.002(3)
C58 0.028(4) 0.028(5) 0.031(4) -0.001(4) 0.009(3) 0.003(3)
C9 0.017(3) 0.018(4) 0.031(4) 0.005(3) 0.005(3) 0.004(3)
C13 0.019(3) 0.021(4) 0.031(4) -0.005(3) 0.004(3) -0.004(3)
C4 0.022(4) 0.024(4) 0.030(4) 0.001(3) 0.006(3) 0.002(3)
C2 0.015(3) 0.021(4) 0.026(4) 0.005(3) 0.003(3) -0.002(3)
C64 0.033(4) 0.029(5) 0.022(4) -0.005(3) -0.006(3) -0.008(3)
C30 0.033(4) 0.029(5) 0.027(4) -0.003(4) 0.007(3) 0.002(3)
C16 0.037(4) 0.015(4) 0.045(5) -0.001(4) 0.006(4) 0.000(3)
C36 0.055(5) 0.027(5) 0.042(5) -0.014(4) 0.028(4) -0.022(4)
C26 0.027(4) 0.027(4) 0.029(4) -0.001(4) 0.005(3) -0.009(3)
C50 0.035(4) 0.027(5) 0.035(4) -0.002(4) 0.015(3) -0.005(4)
C25 0.029(4) 0.039(5) 0.020(4) -0.002(3) 0.005(3) -0.006(3)
C1 0.015(3) 0.016(4) 0.032(4) 0.000(3) 0.008(3) -0.001(3)
C56 0.011(3) 0.031(4) 0.024(4) 0.001(3) -0.003(3) -0.001(3)
C17 0.025(4) 0.025(4) 0.032(4) 0.004(3) 0.004(3) 0.004(3)
C54 0.019(4) 0.038(5) 0.031(4) 0.007(4) 0.011(3) 0.004(3)
C47 0.055(5) 0.041(6) 0.026(4) 0.001(4) -0.014(4) 0.016(4)
C41 0.040(4) 0.022(4) 0.039(5) 0.000(4) 0.012(4) 0.003(4)
C63 0.020(3) 0.021(4) 0.025(4) 0.003(3) 0.001(3) -0.003(3)
C59 0.026(4) 0.039(5) 0.037(4) 0.006(4) 0.005(3) 0.011(4)
C12 0.031(4) 0.032(5) 0.034(4) -0.002(4) -0.011(3) -0.007(4)
C8 0.020(4) 0.027(5) 0.044(5) -0.007(4) -0.002(3) 0.000(3)
C43 0.034(4) 0.031(5) 0.030(4) 0.002(4) 0.007(3) -0.006(4)
C7 0.036(4) 0.021(4) 0.048(5) -0.007(4) 0.010(4) 0.006(4)
C48 0.034(4) 0.030(5) 0.023(4) 0.007(3) 0.000(3) 0.009(4)
C15 0.039(5) 0.017(4) 0.066(6) -0.016(4) -0.009(4) -0.003(4)
C14 0.020(4) 0.037(5) 0.046(5) -0.002(4) -0.005(3) -0.012(4)
C44 0.065(6) 0.039(6) 0.028(4) 0.001(4) 0.004(4) -0.010(5)
C69 0.031(4) 0.037(5) 0.025(4) 0.005(4) -0.004(3) -0.014(4)
C45 0.068(6) 0.026(5) 0.026(4) 0.001(4) 0.004(4) 0.001(4)
C62 0.020(4) 0.045(6) 0.032(4) -0.004(4) -0.005(3) -0.009(4)
F12 0.124(6) 0.138(8) 0.106(6) -0.034(6) 0.042(5) 0.077(6)
C5 0.020(4) 0.029(5) 0.042(5) -0.002(4) 0.007(3) 0.000(3)
F10 0.131(7) 0.052(5) 0.241(10) 0.046(6) 0.114(7) 0.060(5)
C53 0.018(4) 0.057(6) 0.054(5) 0.031(5) 0.002(4) 0.007(4)
C51 0.036(5) 0.032(5) 0.058(6) -0.004(4) 0.019(4) -0.001(4)
C6 0.023(4) 0.038(5) 0.066(6) -0.009(5) 0.005(4) 0.013(4)
C61 0.013(3) 0.053(6) 0.042(5) -0.001(4) 0.003(3) 0.000(4)
C3 0.022(3) 0.025(4) 0.042(4) -0.004(4) 0.005(3) -0.006(3)
C65 0.042(5) 0.055(6) 0.036(5) 0.005(5) -0.012(4) -0.024(5)
C52 0.035(5) 0.036(5) 0.063(6) 0.001(5) 0.022(4) 0.011(4)
C32 0.043(5) 0.030(5) 0.028(4) 0.002(4) 0.003(4) -0.009(4)
C60 0.031(5) 0.076(8) 0.047(5) 0.000(6) 0.021(4) 0.015(5)
F17 0.171(9) 0.136(9) 0.283(13) 0.117(9) -0.153(11) -0.141(9)
C68 0.048(5) 0.029(5) 0.036(4) 0.009(4) 0.000(4) -0.012(4)
F4 0.177(9) 0.048(5) 0.185(9) 0.052(6) -0.036(7) -0.009(6)
C40 0.070(6) 0.050(7) 0.031(5) 0.018(5) 0.020(4) 0.014(5)
C66 0.048(5) 0.036(5) 0.046(5) 0.010(4) -0.004(4) -0.027(4)
C37 0.093(8) 0.041(6) 0.040(5) 0.001(5) 0.031(5) -0.022(6)
F6 0.225(11) 0.044(5) 0.115(6) 0.019(5) 0.049(7) -0.040(6)
C38 0.139(10) 0.014(5) 0.050(6) 0.004(5) 0.038(7) -0.007(6)
F9 0.362(16) 0.228(13) 0.029(4) 0.055(5) -0.063(6) -0.212(13)
C55 0.060(7) 0.068(9) 0.107(10) 0.025(8) 0.048(7) 0.036(6)
F5 0.80(4) 0.032(5) 0.043(5) 0.005(4) 0.092(10) -0.066(10)
F8 0.50(2) 0.119(9) 0.068(5) 0.072(6) 0.073(10) 0.136(13)
F18 0.51(2) 0.156(10) 0.141(9) 0.109(9) -0.181(13) -0.270(15)
F7 0.169(10) 0.38(2) 0.075(6) 0.129(9) 0.019(6) -0.017(12)
C46 0.119(10) 0.065(9) 0.027(5) 0.020(6) -0.004(6) 0.007(7)
C67 0.161(15) 0.056(9) 0.080(9) 0.003(8) -0.036(9) -0.079(10)
C39 0.208(18) 0.030(8) 0.067(9) -0.015(6) 0.008(10) 0.014(10)
F16 0.257(18) 0.133(12) 0.47(3) -0.128(17) 0.095(19) -0.153(13)
 
_geom_special_details
;
 All esds (except the esd in the dihedral angle between two l.s. planes)
 are estimated using the full covariance matrix.  The cell esds are taken
 into account individually in the estimation of esds in distances, angles
 and torsion angles; correlations between esds in cell parameters are only
 used when they are defined by crystal symmetry.  An approximate (isotropic)
 treatment of cell esds is used for estimating esds involving l.s. planes.
;
 
loop_
 _geom_bond_atom_site_label_1
 _geom_bond_atom_site_label_2
 _geom_bond_distance
 _geom_bond_site_symmetry_2
 _geom_bond_publ_flag
Ru1 P4 2.2023(17) . ?
Ru1 P3 2.2380(17) . ?
Ru1 P1 2.3099(19) . ?
Ru1 P2 2.3450(19) . ?
Ru1 Cl2 2.4485(16) . ?
Ru1 Cl1 2.4869(16) . ?
P4 C1 1.798(7) . ?
P4 C10 1.807(7) . ?
P4 C19 1.809(7) . ?
P1 N1 1.706(5) . ?
P1 C49 1.824(7) . ?
P1 C42 1.830(7) . ?
P2 N2 1.721(5) . ?
P2 C35 1.830(8) . ?
P2 C28 1.835(7) . ?
P3 N3 1.728(5) . ?
P3 C63 1.834(7) . ?
P3 C56 1.834(7) . ?
N3 C27 1.395(8) . ?
N3 C19 1.434(8) . ?
F2 C32 1.310(9) . ?
N1 C18 1.410(9) . ?
N1 C10 1.446(8) . ?
F13 C60 1.339(10) . ?
N2 C9 1.388(8) . ?
N2 C1 1.434(9) . ?
F3 C32 1.324(10) . ?
F14 C60 1.306(12) . ?
F15 C60 1.321(11) . ?
C33 C31 1.374(10) . ?
C33 C34 1.411(9) . ?
C33 H33 0.9500 . ?
C23 C24 1.347(10) . ?
C23 C22 1.425(9) . ?
C23 H23 0.9500 . ?
F1 C32 1.306(9) . ?
C27 C26 1.394(9) . ?
C27 C22 1.400(9) . ?
C24 C25 1.412(10) . ?
C24 H24 0.9500 . ?
C34 C28 1.381(10) . ?
C34 H34 0.9500 . ?
C11 C10 1.370(10) . ?
C11 C13 1.418(10) . ?
C11 C12 1.503(9) . ?
C20 C19 1.359(9) . ?
C20 C22 1.434(9) . ?
C20 C21 1.486(9) . ?
C28 C29 1.393(9) . ?
C49 C50 1.388(10) . ?
C49 C54 1.408(9) . ?
C18 C17 1.360(10) . ?
C18 C13 1.433(9) . ?
F11 C55 1.321(14) . ?
C42 C48 1.381(10) . ?
C42 C43 1.402(10) . ?
C21 H21A 0.9800 . ?
C21 H21B 0.9800 . ?
C21 H21C 0.9800 . ?
C57 C56 1.373(10) . ?
C57 C58 1.393(10) . ?
C57 H57 0.9500 . ?
C31 C30 1.376(10) . ?
C31 C32 1.513(10) . ?
C29 C30 1.367(10) . ?
C29 H29 0.9500 . ?
C35 C36 1.376(11) . ?
C35 C41 1.427(10) . ?
C58 C59 1.377(10) . ?
C58 H58 0.9500 . ?
C9 C8 1.392(10) . ?
C9 C4 1.401(10) . ?
C13 C14 1.386(10) . ?
C4 C5 1.397(10) . ?
C4 C2 1.420(10) . ?
C2 C1 1.361(9) . ?
C2 C3 1.505(10) . ?
C64 C63 1.387(10) . ?
C64 C65 1.396(12) . ?
C64 H64 0.9500 . ?
C30 H30 0.9500 . ?
C16 C17 1.372(11) . ?
C16 C15 1.394(11) . ?
C16 H16 0.9500 . ?
C36 C37 1.371(13) . ?
C36 H36 0.9500 . ?
C26 C25 1.381(10) . ?
C26 H26 0.9500 . ?
C50 C51 1.394(11) . ?
C50 H50 0.9500 . ?
C25 H25 0.9500 . ?
C56 C62 1.398(9) . ?
C17 H17 0.9500 . ?
C54 C53 1.386(11) . ?
C54 H54 0.9500 . ?
C47 C45 1.341(12) . ?
C47 C48 1.392(10) . ?
C47 H47 0.9500 . ?
C41 C40 1.364(12) . ?
C41 H41 0.9500 . ?
C63 C69 1.401(10) . ?
C59 C61 1.370(11) . ?
C59 C60 1.507(11) . ?
C12 H12A 0.9800 . ?
C12 H12B 0.9800 . ?
C12 H12C 0.9800 . ?
C8 C7 1.366(10) . ?
C8 H8 0.9500 . ?
C43 C44 1.381(11) . ?
C43 H43 0.9500 . ?
C7 C6 1.403(11) . ?
C7 H7 0.9500 . ?
C48 H48 0.9500 . ?
C15 C14 1.357(12) . ?
C15 H15 0.9500 . ?
C14 H14 0.9500 . ?
C44 C45 1.391(12) . ?
C44 H44 0.9500 . ?
C69 C68 1.374(11) . ?
C69 H69 0.9500 . ?
C45 C46 1.454(12) . ?
C62 C61 1.353(10) . ?
C62 H62 0.9500 . ?
F12 C55 1.300(14) . ?
C5 C6 1.383(11) . ?
C5 H5 0.9500 . ?
F10 C55 1.288(14) . ?
C53 C52 1.394(13) . ?
C53 H53 0.9500 . ?
C51 C52 1.349(12) . ?
C51 H51 0.9500 . ?
C6 H6 0.9500 . ?
C61 H61 0.9500 . ?
C3 H3A 0.9800 . ?
C3 H3B 0.9800 . ?
C3 H3C 0.9800 . ?
C65 C66 1.340(12) . ?
C65 H65 0.9500 . ?
C52 C55 1.504(13) . ?
F17 C67 1.185(16) . ?
F17 F16 1.75(2) . ?
C68 C66 1.407(11) . ?
C68 H68 0.9500 . ?
F4 C39 1.330(18) . ?
C40 C38 1.395(14) . ?
C40 H40 0.9500 . ?
C66 C67 1.520(13) . ?
C37 C38 1.357(15) . ?
C37 H37 0.9500 . ?
F6 C39 1.371(18) . ?
C38 C39 1.505(16) . ?
F9 C46 1.176(13) . ?
F5 C39 1.128(14) . ?
F8 C46 1.259(15) . ?
F18 C67 1.132(14) . ?
F7 C46 1.289(15) . ?
C67 F16 1.34(2) . ?
 
loop_
 _geom_angle_atom_site_label_1
 _geom_angle_atom_site_label_2
 _geom_angle_atom_site_label_3
 _geom_angle
 _geom_angle_site_symmetry_1
 _geom_angle_site_symmetry_3
 _geom_angle_publ_flag
P4 Ru1 P3 87.02(6) . . ?
P4 Ru1 P1 86.14(7) . . ?
P3 Ru1 P1 101.39(7) . . ?
P4 Ru1 P2 83.12(6) . . ?
P3 Ru1 P2 97.41(7) . . ?
P1 Ru1 P2 157.79(6) . . ?
P4 Ru1 Cl2 87.11(6) . . ?
P3 Ru1 Cl2 173.10(6) . . ?
P1 Ru1 Cl2 81.82(6) . . ?
P2 Ru1 Cl2 78.28(6) . . ?
P4 Ru1 Cl1 174.27(7) . . ?
P3 Ru1 Cl1 92.23(6) . . ?
P1 Ru1 Cl1 88.44(6) . . ?
P2 Ru1 Cl1 102.62(6) . . ?
Cl2 Ru1 Cl1 93.97(6) . . ?
C1 P4 C10 113.5(3) . . ?
C1 P4 C19 106.6(3) . . ?
C10 P4 C19 109.0(3) . . ?
C1 P4 Ru1 109.2(2) . . ?
C10 P4 Ru1 110.1(2) . . ?
C19 P4 Ru1 108.3(2) . . ?
N1 P1 C49 103.0(3) . . ?
N1 P1 C42 102.7(3) . . ?
C49 P1 C42 102.6(3) . . ?
N1 P1 Ru1 105.8(2) . . ?
C49 P1 Ru1 124.1(2) . . ?
C42 P1 Ru1 116.0(2) . . ?
N2 P2 C35 96.9(3) . . ?
N2 P2 C28 108.0(3) . . ?
C35 P2 C28 102.9(3) . . ?
N2 P2 Ru1 104.2(2) . . ?
C35 P2 Ru1 130.5(2) . . ?
C28 P2 Ru1 111.9(2) . . ?
N3 P3 C63 105.8(3) . . ?
N3 P3 C56 102.1(3) . . ?
C63 P3 C56 99.8(3) . . ?
N3 P3 Ru1 107.76(19) . . ?
C63 P3 Ru1 115.2(2) . . ?
C56 P3 Ru1 124.2(2) . . ?
C27 N3 C19 106.8(5) . . ?
C27 N3 P3 131.4(4) . . ?
C19 N3 P3 119.0(4) . . ?
C18 N1 C10 107.3(5) . . ?
C18 N1 P1 128.5(5) . . ?
C10 N1 P1 120.8(5) . . ?
C9 N2 C1 107.9(5) . . ?
C9 N2 P2 128.9(5) . . ?
C1 N2 P2 123.1(4) . . ?
C31 C33 C34 118.3(6) . . ?
C31 C33 H33 120.8 . . ?
C34 C33 H33 120.8 . . ?
C24 C23 C22 118.9(7) . . ?
C24 C23 H23 120.6 . . ?
C22 C23 H23 120.6 . . ?
C26 C27 N3 130.7(6) . . ?
C26 C27 C22 121.5(6) . . ?
N3 C27 C22 107.7(5) . . ?
C23 C24 C25 121.3(7) . . ?
C23 C24 H24 119.3 . . ?
C25 C24 H24 119.3 . . ?
C28 C34 C33 120.3(6) . . ?
C28 C34 H34 119.9 . . ?
C33 C34 H34 119.9 . . ?
C10 C11 C13 108.7(6) . . ?
C10 C11 C12 128.6(7) . . ?
C13 C11 C12 122.6(7) . . ?
C19 C20 C22 106.4(6) . . ?
C19 C20 C21 129.8(6) . . ?
C22 C20 C21 123.7(6) . . ?
C27 C22 C23 119.3(6) . . ?
C27 C22 C20 108.9(6) . . ?
C23 C22 C20 131.6(6) . . ?
C34 C28 C29 119.8(6) . . ?
C34 C28 P2 115.4(5) . . ?
C29 C28 P2 124.8(5) . . ?
C20 C19 N3 110.1(6) . . ?
C20 C19 P4 136.5(5) . . ?
N3 C19 P4 112.7(4) . . ?
C50 C49 C54 119.1(7) . . ?
C50 C49 P1 122.5(5) . . ?
C54 C49 P1 118.4(5) . . ?
C17 C18 N1 131.2(6) . . ?
C17 C18 C13 121.6(7) . . ?
N1 C18 C13 107.3(6) . . ?
C11 C10 N1 108.8(6) . . ?
C11 C10 P4 137.9(6) . . ?
N1 C10 P4 113.3(5) . . ?
C48 C42 C43 119.0(6) . . ?
C48 C42 P1 121.4(6) . . ?
C43 C42 P1 119.4(6) . . ?
C20 C21 H21A 109.5 . . ?
C20 C21 H21B 109.5 . . ?
H21A C21 H21B 109.5 . . ?
C20 C21 H21C 109.5 . . ?
H21A C21 H21C 109.5 . . ?
H21B C21 H21C 109.5 . . ?
C56 C57 C58 120.7(7) . . ?
C56 C57 H57 119.6 . . ?
C58 C57 H57 119.6 . . ?
C33 C31 C30 121.0(6) . . ?
C33 C31 C32 118.4(7) . . ?
C30 C31 C32 120.6(6) . . ?
C30 C29 C28 119.5(7) . . ?
C30 C29 H29 120.3 . . ?
C28 C29 H29 120.3 . . ?
C36 C35 C41 117.1(8) . . ?
C36 C35 P2 124.4(6) . . ?
C41 C35 P2 118.3(6) . . ?
C59 C58 C57 118.9(7) . . ?
C59 C58 H58 120.6 . . ?
C57 C58 H58 120.6 . . ?
N2 C9 C8 131.2(6) . . ?
N2 C9 C4 107.4(6) . . ?
C8 C9 C4 121.4(6) . . ?
C14 C13 C11 133.9(7) . . ?
C14 C13 C18 118.1(7) . . ?
C11 C13 C18 108.0(6) . . ?
C5 C4 C9 119.8(7) . . ?
C5 C4 C2 131.9(7) . . ?
C9 C4 C2 108.2(6) . . ?
C1 C2 C4 108.1(6) . . ?
C1 C2 C3 128.5(7) . . ?
C4 C2 C3 123.3(6) . . ?
C63 C64 C65 120.9(7) . . ?
C63 C64 H64 119.5 . . ?
C65 C64 H64 119.5 . . ?
C29 C30 C31 121.0(7) . . ?
C29 C30 H30 119.5 . . ?
C31 C30 H30 119.5 . . ?
C17 C16 C15 120.3(8) . . ?
C17 C16 H16 119.8 . . ?
C15 C16 H16 119.8 . . ?
C37 C36 C35 122.2(9) . . ?
C37 C36 H36 118.9 . . ?
C35 C36 H36 118.9 . . ?
C25 C26 C27 117.8(6) . . ?
C25 C26 H26 121.1 . . ?
C27 C26 H26 121.1 . . ?
C49 C50 C51 121.0(8) . . ?
C49 C50 H50 119.5 . . ?
C51 C50 H50 119.5 . . ?
C26 C25 C24 121.2(6) . . ?
C26 C25 H25 119.4 . . ?
C24 C25 H25 119.4 . . ?
C2 C1 N2 108.1(6) . . ?
C2 C1 P4 141.5(6) . . ?
N2 C1 P4 110.0(4) . . ?
C57 C56 C62 118.6(6) . . ?
C57 C56 P3 121.3(5) . . ?
C62 C56 P3 119.9(6) . . ?
C18 C17 C16 118.8(7) . . ?
C18 C17 H17 120.6 . . ?
C16 C17 H17 120.6 . . ?
C53 C54 C49 118.2(8) . . ?
C53 C54 H54 120.9 . . ?
C49 C54 H54 120.9 . . ?
C45 C47 C48 122.2(8) . . ?
C45 C47 H47 118.9 . . ?
C48 C47 H47 118.9 . . ?
C40 C41 C35 120.3(8) . . ?
C40 C41 H41 119.9 . . ?
C35 C41 H41 119.9 . . ?
C64 C63 C69 118.6(7) . . ?
C64 C63 P3 117.8(5) . . ?
C69 C63 P3 123.6(5) . . ?
C61 C59 C58 120.6(7) . . ?
C61 C59 C60 120.1(7) . . ?
C58 C59 C60 119.3(8) . . ?
C11 C12 H12A 109.5 . . ?
C11 C12 H12B 109.5 . . ?
H12A C12 H12B 109.5 . . ?
C11 C12 H12C 109.5 . . ?
H12A C12 H12C 109.5 . . ?
H12B C12 H12C 109.5 . . ?
C7 C8 C9 118.5(7) . . ?
C7 C8 H8 120.7 . . ?
C9 C8 H8 120.7 . . ?
C44 C43 C42 120.8(8) . . ?
C44 C43 H43 119.6 . . ?
C42 C43 H43 119.6 . . ?
C8 C7 C6 120.7(8) . . ?
C8 C7 H7 119.6 . . ?
C6 C7 H7 119.6 . . ?
C42 C48 C47 118.9(7) . . ?
C42 C48 H48 120.6 . . ?
C47 C48 H48 120.6 . . ?
C14 C15 C16 121.7(8) . . ?
C14 C15 H15 119.2 . . ?
C16 C15 H15 119.2 . . ?
C15 C14 C13 119.5(7) . . ?
C15 C14 H14 120.3 . . ?
C13 C14 H14 120.3 . . ?
C43 C44 C45 119.1(8) . . ?
C43 C44 H44 120.5 . . ?
C45 C44 H44 120.5 . . ?
C68 C69 C63 120.1(7) . . ?
C68 C69 H69 119.9 . . ?
C63 C69 H69 119.9 . . ?
C47 C45 C44 120.0(7) . . ?
C47 C45 C46 121.0(9) . . ?
C44 C45 C46 119.0(9) . . ?
C61 C62 C56 120.7(7) . . ?
C61 C62 H62 119.6 . . ?
C56 C62 H62 119.6 . . ?
C6 C5 C4 118.3(7) . . ?
C6 C5 H5 120.9 . . ?
C4 C5 H5 120.9 . . ?
C54 C53 C52 121.3(7) . . ?
C54 C53 H53 119.3 . . ?
C52 C53 H53 119.3 . . ?
C52 C51 C50 119.8(8) . . ?
C52 C51 H51 120.1 . . ?
C50 C51 H51 120.1 . . ?
C5 C6 C7 121.3(7) . . ?
C5 C6 H6 119.3 . . ?
C7 C6 H6 119.4 . . ?
C62 C61 C59 120.3(7) . . ?
C62 C61 H61 119.8 . . ?
C59 C61 H61 119.8 . . ?
C2 C3 H3A 109.5 . . ?
C2 C3 H3B 109.5 . . ?
H3A C3 H3B 109.5 . . ?
C2 C3 H3C 109.5 . . ?
H3A C3 H3C 109.5 . . ?
H3B C3 H3C 109.5 . . ?
C66 C65 C64 119.5(7) . . ?
C66 C65 H65 120.3 . . ?
C64 C65 H65 120.3 . . ?
C51 C52 C53 120.2(8) . . ?
C51 C52 C55 120.1(10) . . ?
C53 C52 C55 119.7(9) . . ?
F1 C32 F2 107.4(7) . . ?
F1 C32 F3 105.4(8) . . ?
F2 C32 F3 105.2(7) . . ?
F1 C32 C31 114.0(6) . . ?
F2 C32 C31 112.7(7) . . ?
F3 C32 C31 111.6(7) . . ?
F14 C60 F15 105.5(8) . . ?
F14 C60 F13 107.6(9) . . ?
F15 C60 F13 106.1(8) . . ?
F14 C60 C59 114.4(8) . . ?
F15 C60 C59 111.6(9) . . ?
F13 C60 C59 111.1(7) . . ?
C67 F17 F16 50.0(11) . . ?
C69 C68 C66 119.4(8) . . ?
C69 C68 H68 120.3 . . ?
C66 C68 H68 120.3 . . ?
C41 C40 C38 120.3(9) . . ?
C41 C40 H40 119.8 . . ?
C38 C40 H40 119.8 . . ?
C65 C66 C68 121.2(8) . . ?
C65 C66 C67 122.0(9) . . ?
C68 C66 C67 116.7(9) . . ?
C38 C37 C36 120.3(10) . . ?
C38 C37 H37 119.9 . . ?
C36 C37 H37 119.9 . . ?
C37 C38 C40 119.8(9) . . ?
C37 C38 C39 121.2(11) . . ?
C40 C38 C39 119.1(11) . . ?
F10 C55 F12 106.9(13) . . ?
F10 C55 F11 106.6(10) . . ?
F12 C55 F11 105.2(9) . . ?
F10 C55 C52 112.3(9) . . ?
F12 C55 C52 111.5(10) . . ?
F11 C55 C52 113.8(12) . . ?
F9 C46 F8 105.2(13) . . ?
F9 C46 F7 102.9(12) . . ?
F8 C46 F7 98.2(14) . . ?
F9 C46 C45 118.4(12) . . ?
F8 C46 C45 114.6(10) . . ?
F7 C46 C45 115.1(10) . . ?
F18 C67 F17 114.4(15) . . ?
F18 C67 F16 105(2) . . ?
F17 C67 F16 87.5(13) . . ?
F18 C67 C66 120.0(11) . . ?
F17 C67 C66 116.2(14) . . ?
F16 C67 C66 107.4(13) . . ?
F5 C39 F4 114.3(18) . . ?
F5 C39 F6 109.6(17) . . ?
F4 C39 F6 93.4(10) . . ?
F5 C39 C38 118.0(11) . . ?
F4 C39 C38 107.9(13) . . ?
F6 C39 C38 111.0(13) . . ?
C67 F16 F17 42.5(9) . . ?
 
_refine_diff_density_max    0.878
_refine_diff_density_min   -0.947
_refine_diff_density_rms    0.117

_shelx_res_file
;

    FF401_2_0m_a_sq.res created by SHELXL-2014/7


TITL FF401_2_0m_a.res in C2/c
CELL  0.71073  21.5935  27.7533  23.9377   90.000   93.631   90.000
ZERR    8.000   0.0028   0.0037   0.0030    0.000    0.003    0.000
LATT 7
SYMM -X, Y, 1/2-Z
SFAC C  H  N  F  P  Cl Ru
UNIT 552  360  24  144  32  16  8
L.S. 5 0   95
BOND $H
FMAP 2
PLAN 20
SIZE 0.162 0.302 0.345
ABIN
OMIT 8   2   9
OMIT 1   3   0
OMIT -6  12   3
OMIT -7  13   6
ACTA
TEMP -123.150
WGHT    0.100000
FVAR       0.11983
RU1   7    0.251642    0.487741    0.487322    11.00000    0.01478    0.01512 =
         0.01530    0.00003    0.00020   -0.00199
CL2   6    0.178453    0.473705    0.559668    11.00000    0.01983    0.02321 =
         0.02029    0.00007    0.00138   -0.00421
CL1   6    0.344056    0.488553    0.554818    11.00000    0.02199    0.02993 =
         0.02196   -0.00133   -0.00281   -0.00370
P4    5    0.172362    0.479568    0.425521    11.00000    0.01415    0.01797 =
         0.01596    0.00009    0.00058   -0.00012
P1    5    0.255684    0.404574    0.488525    11.00000    0.01813    0.01596 =
         0.01892    0.00094    0.00003   -0.00060
P2    5    0.209845    0.564914    0.498164    11.00000    0.01838    0.01421 =
         0.01958   -0.00117    0.00139   -0.00327
P3    5    0.308998    0.504702    0.415180    11.00000    0.01442    0.02459 =
         0.01600   -0.00007   -0.00068   -0.00351
N3    3    0.260991    0.501863    0.354687    11.00000    0.01735    0.02778 =
         0.01512    0.00275   -0.00475   -0.00184
F2    4    0.215306    0.594136    0.778547    11.00000    0.12548    0.04231 =
         0.02458    0.00392    0.01621   -0.01175
N1    3    0.187267    0.385585    0.456299    11.00000    0.01832    0.01645 =
         0.01742    0.00297   -0.00090    0.00540
F13   4    0.575229    0.383533    0.384693    11.00000    0.02713    0.11727 =
         0.06605   -0.00238    0.00087    0.03655
N2    3    0.133431    0.559096    0.474026    11.00000    0.01230    0.01875 =
         0.02411   -0.00172    0.00617   -0.00357
F3    4    0.195786    0.664716    0.752156    11.00000    0.14143    0.05133 =
         0.03922   -0.02042   -0.01181    0.04107
F14   4    0.525905    0.362091    0.308632    11.00000    0.04938    0.11164 =
         0.08586   -0.04307    0.00678    0.03742
F15   4    0.570040    0.429165    0.313179    11.00000    0.05092    0.10093 =
         0.12214    0.04492    0.05410    0.02369
C33   1    0.276896    0.605245    0.653922    11.00000    0.02772    0.02958 =
         0.01907   -0.00655   -0.00288   -0.00315
AFIX  43
H33   2    0.316809    0.611682    0.671306    11.00000   -1.20000
AFIX   0
C23   1    0.211000    0.529395    0.211888    11.00000    0.03989    0.02682 =
         0.01754    0.00409   -0.00360    0.00506
AFIX  43
H23   2    0.172201    0.533965    0.191590    11.00000   -1.20000
AFIX   0
F1    4    0.287869    0.640882    0.759219    11.00000    0.07055    0.15993 =
         0.03845   -0.04510    0.00319   -0.03666
C27   1    0.271531    0.513028    0.299268    11.00000    0.02678    0.01566 =
         0.01509   -0.00253   -0.00330    0.00034
C24   1    0.264344    0.531551    0.185715    11.00000    0.04469    0.03559 =
         0.02009    0.00440   -0.00127    0.00132
AFIX  43
H24   2    0.262929    0.538372    0.146765    11.00000   -1.20000
AFIX   0
C34   1    0.269986    0.590070    0.597594    11.00000    0.02832    0.02481 =
         0.02124   -0.00282    0.00866   -0.00187
AFIX  43
H34   2    0.305682    0.584658    0.577208    11.00000   -1.20000
AFIX   0
C11   1    0.112324    0.388929    0.384372    11.00000    0.01755    0.03027 =
         0.01991   -0.00038    0.00047   -0.00106
C20   1    0.165932    0.513880    0.308787    11.00000    0.02354    0.02033 =
         0.02422   -0.00276    0.00057   -0.00304
C22   1    0.213765    0.520144    0.270536    11.00000    0.02970    0.01604 =
         0.02039   -0.00071    0.00128   -0.00267
C28   1    0.211558    0.583054    0.571982    11.00000    0.02534    0.01660 =
         0.02291   -0.00542   -0.00165   -0.00169
C19   1    0.195043    0.502236    0.358982    11.00000    0.01417    0.01356 =
         0.02292   -0.00581    0.00278    0.00038
C49   1    0.313338    0.369067    0.454147    11.00000    0.01811    0.01808 =
         0.02488    0.00330    0.00284   -0.00243
C18   1    0.166786    0.338021    0.445742    11.00000    0.01655    0.02739 =
         0.01994    0.00067   -0.00146   -0.00129
C10   1    0.151749    0.416695    0.417892    11.00000    0.02614    0.01842 =
         0.01911   -0.00079    0.00747    0.00230
F11   4    0.504767    0.283596    0.405239    11.00000    0.04847    0.11869 =
         0.15337   -0.00793    0.03683    0.03833
C42   1    0.255080    0.376224    0.557526    11.00000    0.04261    0.01271 =
         0.02053   -0.00250    0.00441    0.00590
C21   1    0.099012    0.522390    0.293717    11.00000    0.03163    0.03542 =
         0.03808    0.01275   -0.00608    0.00340
AFIX 137
H21A  2    0.083551    0.497753    0.267018    11.00000   -1.50000
H21B  2    0.093600    0.554345    0.276683    11.00000   -1.50000
H21C  2    0.075750    0.520683    0.327510    11.00000   -1.50000
AFIX   0
C57   1    0.370639    0.434543    0.355205    11.00000    0.02416    0.02820 =
         0.02480   -0.00292   -0.00181   -0.00204
AFIX  43
H57   2    0.330861    0.426964    0.338257    11.00000   -1.20000
AFIX   0
C31   1    0.224429    0.610471    0.682977    11.00000    0.04308    0.01372 =
         0.02431   -0.00706    0.00340   -0.00319
C29   1    0.159457    0.587203    0.603128    11.00000    0.02576    0.03023 =
         0.02620    0.00075    0.00685   -0.00256
AFIX  43
H29   2    0.119296    0.580676    0.586324    11.00000   -1.20000
AFIX   0
C35   1    0.225152    0.621489    0.462302    11.00000    0.03043    0.02064 =
         0.02593   -0.00043    0.00375    0.00216
C58   1    0.422778    0.410420    0.338201    11.00000    0.02787    0.02846 =
         0.03109   -0.00109    0.00937    0.00348
AFIX  43
H58   2    0.418796    0.386069    0.310313    11.00000   -1.20000
AFIX   0
C9    1    0.084201    0.590251    0.480818    11.00000    0.01717    0.01792 =
         0.03120    0.00452    0.00542    0.00357
C13   1    0.120038    0.340040    0.400549    11.00000    0.01938    0.02105 =
         0.03138   -0.00510    0.00404   -0.00438
C4    1    0.029853    0.566556    0.461036    11.00000    0.02207    0.02380 =
         0.03041    0.00081    0.00552    0.00195
C2    1    0.046700    0.521429    0.438554    11.00000    0.01491    0.02095 =
         0.02637    0.00482    0.00349   -0.00229
C64   1    0.377801    0.579399    0.464082    11.00000    0.03284    0.02927 =
         0.02220   -0.00502   -0.00554   -0.00784
AFIX  43
H64   2    0.381589    0.558318    0.495380    11.00000   -1.20000
AFIX   0
C30   1    0.166597    0.600744    0.658069    11.00000    0.03271    0.02940 =
         0.02666   -0.00272    0.00681    0.00209
AFIX  43
H30   2    0.131106    0.603478    0.679367    11.00000   -1.20000
AFIX   0
C16   1    0.156575    0.253819    0.450902    11.00000    0.03718    0.01548 =
         0.04466   -0.00140    0.00570   -0.00041
AFIX  43
H16   2    0.168113    0.223890    0.467779    11.00000   -1.20000
AFIX   0
C36   1    0.260576    0.658511    0.485360    11.00000    0.05545    0.02728 =
         0.04224   -0.01434    0.02784   -0.02180
AFIX  43
H36   2    0.282192    0.653760    0.520742    11.00000   -1.20000
AFIX   0
C26   1    0.326576    0.515581    0.272010    11.00000    0.02655    0.02713 =
         0.02852   -0.00071    0.00495   -0.00864
AFIX  43
H26   2    0.365710    0.511745    0.291967    11.00000   -1.20000
AFIX   0
C50   1    0.297987    0.339853    0.408289    11.00000    0.03506    0.02655 =
         0.03473   -0.00213    0.01513   -0.00542
AFIX  43
H50   2    0.257064    0.340814    0.391240    11.00000   -1.20000
AFIX   0
C25   1    0.322332    0.523873    0.215025    11.00000    0.02918    0.03873 =
         0.01994   -0.00176    0.00547   -0.00640
AFIX  43
H25   2    0.359062    0.524422    0.195186    11.00000   -1.20000
AFIX   0
C1    1    0.109484    0.516961    0.445546    11.00000    0.01529    0.01565 =
         0.03233    0.00033    0.00752   -0.00124
C56   1    0.376101    0.469153    0.396186    11.00000    0.01127    0.03096 =
         0.02384    0.00052   -0.00263   -0.00087
C17   1    0.184906    0.295494    0.469794    11.00000    0.02451    0.02455 =
         0.03158    0.00369    0.00407    0.00417
AFIX  43
H17   2    0.216619    0.294661    0.499155    11.00000   -1.20000
AFIX   0
C54   1    0.375487    0.371059    0.475644    11.00000    0.01872    0.03837 =
         0.03068    0.00705    0.01108    0.00429
AFIX  43
H54   2    0.388110    0.393241    0.504373    11.00000   -1.20000
AFIX   0
C47   1    0.305159    0.351226    0.644517    11.00000    0.05520    0.04139 =
         0.02583    0.00128   -0.01449    0.01564
AFIX  43
H47   2    0.342165    0.347476    0.667755    11.00000   -1.20000
AFIX   0
C41   1    0.195198    0.629533    0.408233    11.00000    0.03967    0.02240 =
         0.03871   -0.00050    0.01163    0.00284
AFIX  43
H41   2    0.171420    0.604539    0.390230    11.00000   -1.20000
AFIX   0
C63   1    0.343335    0.565152    0.416076    11.00000    0.01985    0.02068 =
         0.02512    0.00325    0.00119   -0.00281
C59   1    0.480195    0.422462    0.362498    11.00000    0.02639    0.03943 =
         0.03695    0.00595    0.00456    0.01103
C12   1    0.069930    0.404240    0.335375    11.00000    0.03133    0.03185 =
         0.03361   -0.00249   -0.01106   -0.00718
AFIX 137
H12A  2    0.070011    0.439463    0.332491    11.00000   -1.50000
H12B  2    0.027706    0.392974    0.340740    11.00000   -1.50000
H12C  2    0.084426    0.390269    0.300942    11.00000   -1.50000
AFIX   0
C8    1    0.082574    0.636762    0.502390    11.00000    0.01951    0.02690 =
         0.04414   -0.00660   -0.00231    0.00027
AFIX  43
H8    2    0.119711    0.652607    0.515455    11.00000   -1.20000
AFIX   0
C43   1    0.198367    0.362643    0.578262    11.00000    0.03391    0.03146 =
         0.03049    0.00166    0.00707   -0.00619
AFIX  43
H43   2    0.160915    0.367563    0.555982    11.00000   -1.20000
AFIX   0
C7    1    0.026406    0.659140    0.504368    11.00000    0.03553    0.02101 =
         0.04810   -0.00720    0.01017    0.00647
AFIX  43
H7    2    0.024443    0.690837    0.519134    11.00000   -1.20000
AFIX   0
C48   1    0.308812    0.371283    0.591543    11.00000    0.03359    0.03013 =
         0.02265    0.00722    0.00013    0.00871
AFIX  43
H48   2    0.347596    0.381404    0.578987    11.00000   -1.20000
AFIX   0
C15   1    0.110924    0.255172    0.407051    11.00000    0.03871    0.01741 =
         0.06567   -0.01552   -0.00940   -0.00342
AFIX  43
H15   2    0.092023    0.225925    0.394325    11.00000   -1.20000
AFIX   0
C14   1    0.092801    0.297221    0.382079    11.00000    0.02000    0.03732 =
         0.04553   -0.00232   -0.00549   -0.01207
AFIX  43
H14   2    0.061695    0.297295    0.352181    11.00000   -1.20000
AFIX   0
C44   1    0.196319    0.342194    0.630709    11.00000    0.06487    0.03876 =
         0.02842    0.00131    0.00394   -0.00962
AFIX  43
H44   2    0.157974    0.331808    0.643958    11.00000   -1.20000
AFIX   0
C69   1    0.335263    0.597868    0.371626    11.00000    0.03144    0.03661 =
         0.02542    0.00476   -0.00406   -0.01414
AFIX  43
H69   2    0.309273    0.589729    0.339507    11.00000   -1.20000
AFIX   0
C45   1    0.251165    0.337018    0.663855    11.00000    0.06838    0.02560 =
         0.02587    0.00126    0.00445    0.00081
C62   1    0.434926    0.478902    0.421469    11.00000    0.01986    0.04467 =
         0.03230   -0.00390   -0.00486   -0.00866
AFIX  43
H62   2    0.439251    0.501898    0.450854    11.00000   -1.20000
AFIX   0
F12   4    0.444343    0.270747    0.335620    11.00000    0.12398    0.13828 =
         0.10603   -0.03399    0.04229    0.07740
C5    1   -0.027438    0.589613    0.463268    11.00000    0.01997    0.02903 =
         0.04240   -0.00187    0.00715   -0.00038
AFIX  43
H5    2   -0.064756    0.573963    0.450315    11.00000   -1.20000
AFIX   0
F10   4    0.436899    0.229963    0.407709    11.00000    0.13101    0.05229 =
         0.24066    0.04578    0.11424    0.06038
C53   1    0.417782    0.339791    0.453779    11.00000    0.01837    0.05695 =
         0.05384    0.03062    0.00232    0.00668
AFIX  43
H53   2    0.459501    0.339625    0.468983    11.00000   -1.20000
AFIX   0
C51   1    0.341718    0.309118    0.386869    11.00000    0.03596    0.03177 =
         0.05828   -0.00366    0.01940   -0.00115
AFIX  43
H51   2    0.330265    0.288629    0.356142    11.00000   -1.20000
AFIX   0
C6    1   -0.028417    0.635823    0.484830    11.00000    0.02296    0.03840 =
         0.06633   -0.00896    0.00450    0.01309
AFIX  43
H6    2   -0.066967    0.652097    0.486443    11.00000   -1.20000
AFIX   0
C61   1    0.485742    0.455951    0.404549    11.00000    0.01254    0.05340 =
         0.04192   -0.00123    0.00262   -0.00021
AFIX  43
H61   2    0.525460    0.463094    0.421915    11.00000   -1.20000
AFIX   0
C3    1    0.000198    0.485750    0.413753    11.00000    0.02190    0.02541 =
         0.04220   -0.00423    0.00538   -0.00604
AFIX 137
H3A   2   -0.006282    0.491413    0.373396    11.00000   -1.50000
H3B   2   -0.039228    0.489654    0.431394    11.00000   -1.50000
H3C   2    0.015830    0.452954    0.420321    11.00000   -1.50000
AFIX   0
C65   1    0.407009    0.624268    0.467077    11.00000    0.04239    0.05520 =
         0.03577    0.00471   -0.01200   -0.02436
AFIX  43
H65   2    0.430111    0.633839    0.500324    11.00000   -1.20000
AFIX   0
C52   1    0.400338    0.308581    0.409925    11.00000    0.03535    0.03552 =
         0.06345    0.00087    0.02228    0.01058
C32   1    0.231651    0.627153    0.743231    11.00000    0.04264    0.02956 =
         0.02836    0.00241    0.00326   -0.00878
C60   1    0.537289    0.398790    0.341889    11.00000    0.03069    0.07551 =
         0.04673   -0.00045    0.02140    0.01498
F17   4    0.483383    0.704419    0.448644    11.00000    0.17074    0.13613 =
         0.28263    0.11722   -0.15309   -0.14105
C68   1    0.364867    0.641686    0.374418    11.00000    0.04775    0.02911 =
         0.03649    0.00891   -0.00018   -0.01213
AFIX  43
H68   2    0.360171    0.663664    0.344019    11.00000   -1.20000
AFIX   0
F4    4    0.192696    0.784221    0.391926    11.00000    0.17741    0.04803 =
         0.18463    0.05243   -0.03629   -0.00942
C40   1    0.200577    0.672962    0.382310    11.00000    0.06984    0.05046 =
         0.03090    0.01839    0.02012    0.01449
AFIX  43
H40   2    0.180009    0.678234    0.346569    11.00000   -1.20000
AFIX   0
C66   1    0.402197    0.653728    0.422683    11.00000    0.04782    0.03579 =
         0.04582    0.01004   -0.00409   -0.02707
C37   1    0.265725    0.702044    0.458975    11.00000    0.09347    0.04061 =
         0.04032    0.00107    0.03075   -0.02159
AFIX  43
H37   2    0.290109    0.726967    0.476435    11.00000   -1.20000
AFIX   0
F6    4    0.283248    0.786779    0.406358    11.00000    0.22513    0.04399 =
         0.11537    0.01855    0.04948   -0.04013
C38   1    0.236135    0.709688    0.408013    11.00000    0.13922    0.01449 =
         0.05022    0.00429    0.03767   -0.00736
F9    4    0.278195    0.332998    0.756626    11.00000    0.36199    0.22800 =
         0.02905    0.05516   -0.06305   -0.21198
C55   1    0.446516    0.272965    0.389936    11.00000    0.06002    0.06790 =
         0.10741    0.02493    0.04769    0.03608
F5    4    0.248817    0.757102    0.332551    11.00000    0.79828    0.03227 =
         0.04319    0.00491    0.09184   -0.06576
F8    4    0.262720    0.271223    0.720998    11.00000    0.50139    0.11867 =
         0.06805    0.07156    0.07267    0.13598
F18   4    0.431852    0.725266    0.383383    11.00000    0.50671    0.15609 =
         0.14077    0.10929   -0.18146   -0.27005
F7    4    0.194298    0.312205    0.737478    11.00000    0.16897    0.37657 =
         0.07453    0.12934    0.01915   -0.01716
C46   1    0.248912    0.315279    0.718949    11.00000    0.11922    0.06496 =
         0.02732    0.01957   -0.00376    0.00682
C67   1    0.435078    0.702141    0.422407    11.00000    0.16064    0.05552 =
         0.08041    0.00340   -0.03631   -0.07929
C39   1    0.240588    0.757370    0.378602    11.00000    0.20846    0.02991 =
         0.06672   -0.01491    0.00791    0.01434
F16   4    0.411443    0.729516    0.462081    11.00000    0.25676    0.13250 =
         0.46986   -0.12782    0.09465   -0.15347
HKLF 4

REM  FF401_2_0m_a.res in C2/c
REM R1 =  0.0715 for    7363 Fo > 4sig(Fo)  and  0.1275 for all   12329 data
REM    877 parameters refined using      0 restraints

END

WGHT      0.0909     39.7956

REM Highest difference peak  0.878,  deepest hole -0.947,  1-sigma level  0.117
Q1    1   0.3178  0.3020  0.7336  11.00000  0.05    0.88
Q2    1   0.3002  0.4902  0.4791  11.00000  0.05    0.84
Q3    1   0.3972  0.7410  0.4122  11.00000  0.05    0.82
Q4    1   0.1862  0.7621  0.3439  11.00000  0.05    0.80
Q5    1   0.2208  0.2796  0.7222  11.00000  0.05    0.74
Q6    1   0.4832  0.7001  0.3878  11.00000  0.05    0.73
Q7    1   0.2150  0.4885  0.5039  11.00000  0.05    0.71
Q8    1   0.2570  0.2602  0.7168  11.00000  0.05    0.67
Q9    1   0.2798  0.7529  0.3306  11.00000  0.05    0.65
Q10   1   0.2768  0.5111  0.4448  11.00000  0.05    0.64
Q11   1   0.2183  0.4612  0.5323  11.00000  0.05    0.59
Q12   1   0.2208  0.4960  0.4530  11.00000  0.05    0.59
Q13   1   0.1103  0.4863  0.4848  11.00000  0.05    0.58
Q14   1   0.2829  0.7692  0.3549  11.00000  0.05    0.54
Q15   1   0.5200  0.6716  0.4321  11.00000  0.05    0.54
Q16   1   0.2807  0.4722  0.3773  11.00000  0.05    0.51
Q17   1   0.3954  0.4888  0.4860  11.00000  0.05    0.51
Q18   1   0.2244  0.5121  0.5278  11.00000  0.05    0.50
Q19   1   0.4003  0.7332  0.4779  11.00000  0.05    0.48
Q20   1   0.2284  0.3433  0.7577  11.00000  0.05    0.47
;
_shelx_res_checksum   35537

_shelx_hkl_file
;
  -6   0   0  655.93   31.50
  -8   0   0  327.27   20.50
 -10   0   0  102.89   14.50
 -12   0   0 1774.52   80.19
 -14   0   0 1405.36   65.59
 -16   0   0  712.23   39.50
 -18   0   0  403.66   31.40
 -20   0   0   52.39   23.00
 -22   0   0  468.95   38.20
 -24   0   0  373.26   34.60
  -3  -1   0  579.34   26.30
  -3   1   0  591.84   26.90
  -5  -1   0  696.33   33.00
  -5   1   0  738.93   33.80
  -7  -1   0  255.57   16.80
  -7   1   0  255.87   18.00
  -9  -1   0   67.39   12.10
  -9   1   0   33.80   13.20
 -11  -1   0  269.17   20.90
 -11   1   0  260.67   21.50
 -13  -1   0  666.13   35.70
 -13   1   0  686.03   36.40
 -15  -1   0   45.60   19.60
 -15   1   0   35.50   21.00
 -17  -1   0   62.69   21.20
 -17   1   0   70.29   19.90
 -19  -1   0  311.97   30.00
 -19   1   0  325.17   28.40
 -21  -1   0  273.97   28.40
 -21   1   0  307.17   29.50
 -23  -1   0  656.33   62.49
 -23  -1   0  534.35   43.50
 -23   1   0  608.84   48.40
 -25  -1   0  168.88   32.60
 -25   1   0  213.88   32.40
  -4  -2   0   42.30   10.10
  -4  -2   0   57.99    7.10
  -4   2   0   49.50    9.60
  -6  -2   0  946.61   43.60
  -6   2   0  977.30   44.40
  -8  -2   0  692.13   34.00
  -8   2   0  676.03   34.30
 -10  -2   0  895.81   43.40
 -10   2   0  882.31   43.60
 -12  -2   0 1335.57   61.29
 -12   2   0 1326.77   62.19
 -14  -2   0  848.52   42.40
 -14   2   0  832.42   45.40
 -16  -2   0  405.66   31.90
 -16   2   0  427.66   30.20
 -18  -2   0  179.88   22.70
 -18   2   0  201.98   23.90
 -20  -2   0   16.40   24.70
 -20   2   0   26.00   23.60
 -22  -2   0  227.28   28.90
 -22  -2   0  320.07   52.39
 -22   2   0  247.68   33.10
 -24  -2   0  294.07   33.60
 -24  -2   0  360.46   56.79
 -24   2   0  300.27   34.20
  -1  -3   0   -8.50    3.20
  -3  -3   0  119.79    9.60
  -3  -3   0  159.48   22.60
  -3   3   0  119.29   10.80
  -5   3   0  126.19   12.90
  -7  -3   0   23.00   10.70
  -7  -3   0   26.40   13.50
  -7   3   0   27.90   12.30
  -9  -3   0   29.50   12.90
  -9   3   0   20.90   13.90
 -11  -3   0  278.37   20.40
 -11   3   0  266.87   23.10
 -13  -3   0   28.40   14.40
 -13   3   0   16.70   18.70
 -15  -3   0    2.90   15.80
 -15   3   0   -7.40   17.70
 -17  -3   0   -4.20   25.40
 -17  -3   0   14.60   18.30
 -17   3   0  -22.20   19.60
 -19  -3   0   83.29   22.00
 -19  -3   0   83.99   29.10
 -19   3   0   87.69   23.30
 -21  -3   0   75.09   27.00
 -21   3   0   72.09   28.60
 -23  -3   0  369.06   34.40
 -23  -3   0  446.06   57.59
 -23   3   0  357.16   35.70
 -25  -3   0  140.39   31.30
 -25   3   0   54.89   35.20
  -2  -4   0 1610.44   71.49
  -2   4   0 1684.63   72.29
  -4  -4   0   39.00   10.60
  -4  -4   0   19.50    6.70
  -4   4   0   12.40   10.80
  -8  -4   0  143.09   12.60
  -8  -4   0  134.59   24.80
  -8   4   0  141.79   15.70
 -10  -4   0 1083.39   56.29
 -10  -4   0 1119.79   51.39
 -10   4   0 1063.79   51.99
 -12  -4   0 1739.13   78.89
 -12  -4   0 1769.22   84.89
 -12   4   0 1755.92   80.19
 -14  -4   0  832.62   44.60
 -14  -4   0  881.91   53.09
 -16  -4   0  721.53   40.20
 -16  -4   0  811.82   52.59
 -16   4   0  716.73   42.60
 -18  -4   0   61.89   27.90
 -18  -4   0   64.29   21.00
 -18   4   0   60.49   22.20
 -20  -4   0  508.35   36.00
 -20  -4   0  505.85   53.39
 -20   4   0  441.26   37.20
 -22  -4   0    7.40   28.50
 -22  -4   0   22.30   34.00
 -22   4   0   33.80   27.70
 -24  -4   0   49.20   28.30
 -24   4   0   40.50   29.60
  -5  -5   0  252.37   15.30
  -5  -5   0  210.58   20.90
  -5   5   0  226.78   18.00
  -7  -5   0   -0.10    8.90
  -7  -5   0    2.60   13.50
  -7   5   0   -0.40   13.10
  -9  -5   0   23.70   16.70
  -9  -5   0   30.80   12.90
  -9   5   0    9.50   15.40
 -11  -5   0  196.98   31.60
 -11  -5   0  234.68   18.90
 -11   5   0  210.58   20.60
 -13  -5   0  196.08   19.90
 -13  -5   0  189.88   34.30
 -13   5   0  202.88   20.80
 -15  -5   0   15.20   16.20
 -15  -5   0   14.20   22.50
 -15   5   0   -1.40   19.60
 -17  -5   0  124.69   22.30
 -17  -5   0   98.99   26.90
 -17   5   0   98.49   23.20
 -19  -5   0   52.89   29.70
 -19  -5   0   33.10   21.30
 -19   5   0   35.80   23.80
 -21  -5   0   21.40   24.20
 -21  -5   0   64.99   32.50
 -21   5   0   32.30   25.50
 -23  -5   0  258.27   33.30
 -23  -5   0  236.38   39.60
 -23   5   0  265.47   32.80
 -25  -5   0   47.30   29.70
 -25   5   0   22.10   36.20
   0   6   0 2978.90  129.49
  -2  -6   0 5233.08  227.78
  -2  -6   0 5323.77  229.88
  -2   6   0 5277.77  228.28
  -4  -6   0  904.11   44.60
  -4  -6   0  824.52   39.00
  -4   6   0  843.72   40.60
  -6  -6   0  359.66   27.10
  -6  -6   0  402.86   19.90
  -6   6   0  348.87   23.30
  -8  -6   0    3.80    9.90
  -8  -6   0    9.50   16.00
  -8   6   0  -16.80   15.10
 -10  -6   0   34.40   18.20
 -10  -6   0   25.60   11.60
 -10   6   0   15.20   16.50
 -12  -6   0  786.92   48.30
 -12  -6   0  758.52   39.70
 -12   6   0  745.63   40.80
 -14  -6   0 1619.74   79.59
 -14  -6   0 1530.55   72.29
 -14   6   0 1505.05   72.99
 -16  -6   0  846.82   55.09
 -16  -6   0  797.12   41.90
 -16   6   0  734.23   45.30
 -18  -6   0  257.47   26.50
 -18  -6   0  251.97   44.90
 -18   6   0  233.88   27.90
 -20  -6   0  283.87   27.30
 -20  -6   0  259.57   36.60
 -20   6   0  268.87   30.30
 -22  -6   0  -11.50   35.20
 -22  -6   0   14.50   25.20
 -22   6   0   13.70   27.90
 -24  -6   0   38.20   27.70
 -24   6   0   14.90   31.10
  -1   7   0 1788.42   78.29
   1   7   0 1758.02   77.99
  -3  -7   0 2499.75  104.79
  -3  -7   0 2137.49  107.59
  -3   7   0 2587.74  105.59
  -5   7   0    9.30   10.30
  -7  -7   0  415.56   23.90
  -7  -7   0  454.25   32.40
  -7   7   0  428.46   26.70
  -9  -7   0  210.68   29.90
  -9  -7   0  141.59   15.00
  -9   7   0  118.99   18.50
 -11  -7   0  333.47   24.00
 -11  -7   0  329.37   34.30
 -11   7   0  319.77   26.40
 -13  -7   0    8.10   21.30
 -13  -7   0   -3.40   16.00
 -13   7   0   15.50   19.10
 -15  -7   0   27.70   18.50
 -15  -7   0   -4.10   23.90
 -15   7   0  -13.90   19.40
 -17  -7   0  333.07   28.60
 -17  -7   0  391.36   46.90
 -17   7   0  366.36   34.00
 -19  -7   0    7.10   23.20
 -19  -7   0  -23.20   30.20
 -19   7   0   -8.40   25.10
 -21  -7   0   27.20   23.20
 -21  -7   0   30.90   35.40
 -21   7   0   43.40   28.60
 -23  -7   0   25.00   42.20
 -23  -7   0   62.19   26.70
 -23   7   0   92.59   31.10
 -25  -7   0   35.70   30.40
 -25   7   0   54.69   34.10
   0   8   0 9999.00  431.36
  -2   8   0 4431.36  196.28
   2   8   0 4618.84  196.18
  -4  -8   0  495.35   34.70
  -4  -8   0  438.36   23.70
  -4   8   0  456.55   26.50
  -6  -8   0  687.33   33.70
  -6   8   0  715.23   34.50
 -10  -8   0  337.67   35.10
 -10  -8   0  286.17   22.40
 -10   8   0  254.47   23.30
 -12  -8   0 1199.48   54.89
 -12  -8   0 1140.79   63.79
 -12   8   0 1101.19   58.99
 -14  -8   0 1434.86   67.39
 -14  -8   0 1425.66   74.89
 -14   8   0 1439.46   68.89
 -16  -8   0  589.34   51.79
 -16  -8   0  597.74   37.70
 -16   8   0  595.54   38.90
 -18  -8   0  148.19   22.50
 -18  -8   0  154.68   32.00
 -18   8   0  167.68   27.40
 -20  -8   0  121.29   24.10
 -20  -8   0   94.29   34.90
 -20   8   0  112.69   28.60
 -22  -8   0   51.29   29.10
 -22   8   0   43.20   30.00
 -24  -8   0    0.20   33.30
 -24   8   0   -8.10   32.50
  -1   9   0  742.63   36.30
   1   9   0  751.22   35.80
  -5  -9   0  369.56   21.20
  -5   9   0  372.26   24.50
  -9  -9   0  205.98   16.70
  -9   9   0  186.48   17.60
 -11  -9   0  116.19   23.50
 -11  -9   0  148.29   15.20
 -11   9   0  144.99   20.20
 -13  -9   0    4.40   23.30
 -13  -9   0    8.20   14.60
 -13   9   0   36.80   20.40
 -15  -9   0   43.20   17.30
 -15  -9   0    6.30   25.40
 -15   9   0   10.40   22.10
 -17  -9   0   -7.40   18.80
 -17  -9   0  -44.90   29.30
 -17   9   0  -27.20   23.60
 -19  -9   0   17.90   24.70
 -19   9   0   18.20   27.00
 -21  -9   0   11.30   24.40
 -21   9   0   55.39   28.90
 -23  -9   0   79.69   32.00
 -23   9   0   69.99   32.00
   0  10   0 4998.40  216.78
  -2  10   0 1475.15   66.79
   2  10   0 1433.06   65.29
  -4 -10   0 1373.56   61.59
  -4  10   0 1373.16   63.09
 -10 -10   0 1040.90   63.49
 -10 -10   0 1086.49   50.29
 -10  10   0 1112.79   51.69
 -12 -10   0 1430.36   83.29
 -12 -10   0 1670.83   72.29
 -12  10   0 1679.23   74.99
 -14 -10   0  637.64   33.80
 -14 -10   0  528.65   52.29
 -14  10   0  599.44   38.50
 -16 -10   0  264.57   25.40
 -16  10   0  233.38   27.30
 -18 -10   0  -37.60   33.50
 -18 -10   0   74.29   24.30
 -18  10   0   34.30   26.20
 -20 -10   0  253.07   30.10
 -20  10   0  206.08   31.60
 -22 -10   0   72.19   31.70
 -22  10   0   25.80   31.60
 -24 -10   0   34.60   31.20
 -24  10   0   58.69   34.90
   1  11   0  432.06   25.00
  -1  11   0  419.06   25.90
   3  11   0   92.29   13.80
  -3  11   0   75.29   15.90
 -11 -11   0   63.19   28.40
 -11 -11   0   35.50   15.30
 -11  11   0   35.90   19.30
 -13 -11   0  148.29   17.10
 -13 -11   0   95.29   30.10
 -13  11   0  137.99   23.30
 -15 -11   0   73.89   30.30
 -15 -11   0  118.29   35.40
 -15  11   0  117.39   24.40
 -17 -11   0   17.40   20.10
 -17  11   0   37.80   26.30
 -19 -11   0  -73.29   37.40
 -19 -11   0   61.99   23.40
 -19  11   0   90.19   28.80
 -21 -11   0   45.90   26.30
 -21  11   0   48.90   31.90
 -23 -11   0   77.49   30.40
 -23  11   0  111.69   36.20
   0  12   0 2759.02  121.49
  -2  12   0 2015.60   90.69
   2  12   0 2030.30   90.69
  -8 -12   0  376.36   23.80
  -8  12   0  381.16   25.00
 -10 -12   0  589.54   33.50
 -10 -12   0  664.33   54.59
 -12 -12   0  316.57   49.80
 -12 -12   0  378.46   24.40
 -12  12   0  371.66   31.00
 -14 -12   0  123.69   34.10
 -14 -12   0  154.88   18.30
 -14  12   0  151.68   26.40
 -16 -12   0  -44.00   33.90
 -16 -12   0   -4.80   21.50
 -16  12   0    2.20   25.30
 -18 -12   0  158.28   26.50
 -18  12   0  121.49   29.50
 -20 -12   0  344.57   33.50
 -20  12   0  286.57   36.40
 -22 -12   0  480.15   41.30
 -22  12   0  517.35   48.10
   1  13   0   43.80   15.50
  -1  13   0   60.49   16.60
   3  13   0  299.77   23.00
  -3  13   0  329.27   25.10
  -9 -13   0   53.09   12.90
  -9  13   0   85.69   32.00
 -11 -13   0   64.79   34.00
 -11 -13   0   19.50   15.50
 -11  13   0   32.40   20.50
 -13 -13   0   10.70   35.90
 -13 -13   0   15.30   18.10
 -13  13   0   14.30   23.20
 -15 -13   0   20.20   20.50
 -15 -13   0   -4.10   39.60
 -15  13   0   23.00   26.00
 -17 -13   0  107.59   25.20
 -17  13   0  120.39   28.80
 -19 -13   0   49.70   28.10
 -19  13   0   61.69   28.90
 -21 -13   0  179.78   29.80
 -21  13   0  180.38   35.40
 -23 -13   0   25.60   34.60
 -23  13   0   67.59   37.50
   0  14   0 2199.68   98.59
   2  14   0   -0.70   15.10
  -2  14   0   -5.00   16.90
   4  14   0  466.15   27.80
  -4  14   0  440.26   30.20
  -8  14   0    0.40   22.80
 -10 -14   0  -13.40   14.90
 -10 -14   0   96.39   41.50
 -10  14   0  -11.30   20.50
 -12 -14   0   91.39   41.40
 -12 -14   0   31.70   17.10
 -12  14   0   17.50   22.70
 -14 -14   0   79.29   41.80
 -14  14   0   36.10   24.70
 -16 -14   0   54.69   23.10
 -16 -14   0   -8.20   44.70
 -16  14   0   90.09   27.50
 -18 -14   0  395.16   34.40
 -18  14   0  407.66   40.70
 -20 -14   0  167.08   30.90
 -20  14   0  153.78   34.20
 -22 -14   0  165.58   34.80
 -22  14   0  142.89   36.20
   1  15   0  289.97   27.40
  -1  15   0  278.87   25.10
   3  15   0  537.15   31.50
  -3  15   0  550.64   33.10
   5  15   0   66.19   15.90
  -5  15   0   41.30   19.20
  -9 -15   0  407.86   28.10
  -9 -15   0  561.34   58.29
  -9  15   0  430.06   33.10
 -11 -15   0  186.58   18.20
 -11  15   0  204.38   25.10
 -13 -15   0  153.58   48.10
 -13 -15   0   26.90   21.80
 -13  15   0   47.40   25.20
 -15 -15   0    3.20   21.10
 -15 -15   0  -55.79   49.50
 -15  15   0  -24.80   26.00
 -17 -15   0   87.29   25.70
 -17  15   0  112.29   30.80
 -19 -15   0   18.70   24.80
 -19  15   0   22.60   30.40
 -21 -15   0   26.70   28.70
 -21  15   0   13.90   35.90
   0  16   0  293.57   28.70
   2  16   0   90.29   20.00
  -2  16   0   86.39   19.40
   4  16   0   23.50   16.50
  -4  16   0    9.20   18.70
  -6  16   0   -0.60   23.60
   6  16   0   24.80   18.10
 -12 -16   0  206.98   49.30
 -12 -16   0   81.69   19.30
 -12  16   0   54.39   25.40
 -14 -16   0   85.39   52.09
 -14 -16   0   29.00   18.30
 -14  16   0   18.90   26.30
 -16 -16   0  -14.00   23.20
 -16  16   0    4.00   28.50
 -18 -16   0  112.69   28.20
 -18  16   0  127.89   33.10
 -20 -16   0  187.98   29.90
 -20  16   0  215.08   36.00
 -22 -16   0   32.20   35.40
 -22  16   0   18.80   37.50
   1  17   0   30.50   20.20
  -1  17   0   29.60   18.90
   3  17   0  256.97   24.90
  -3  17   0  289.07   26.40
   5  17   0   13.50   17.40
  -5  17   0  -10.80   33.10
  -7  17   0   -9.20   20.80
   7  17   0   -5.40   18.80
  -9 -17   0  243.18   21.60
  -9  17   0  278.77   26.90
 -11 -17   0  435.96   30.50
 -11  17   0  457.25   36.20
 -13 -17   0  -11.60   20.10
 -13 -17   0  203.58   60.99
 -13  17   0   17.20   25.70
 -15 -17   0  -43.50   58.89
 -15 -17   0   67.19   23.10
 -15  17   0   56.59   28.90
 -17 -17   0    7.60   22.30
 -17  17   0   28.60   31.10
 -19 -17   0  -28.30   28.40
 -19  17   0  -14.30   35.00
 -21 -17   0  -27.00   29.10
 -21  17   0   18.80   41.60
   0  18   0   53.99   19.80
  -2  18   0  129.69   21.30
   2  18   0  116.19   20.30
   4  18   0  154.98   22.10
   6  18   0  192.48   22.80
  -6  18   0  166.58   23.80
  -8  18   0   20.10   22.70
 -10 -18   0   21.50   15.70
 -10  18   0   18.60   19.50
 -14 -18   0   28.00   21.90
 -14 -18   0   93.69   67.09
 -14  18   0   38.90   29.00
 -16 -18   0   49.80   25.30
 -16  18   0   19.80   31.00
 -18 -18   0   62.09   29.20
 -18  18   0   59.49   33.00
 -20 -18   0   87.99   32.20
 -20  18   0  120.09   37.60
  -1  19   0   58.09   21.20
   1  19   0   45.00   22.70
   3  19   0    8.50   19.20
  -3  19   0   -2.00   21.20
   5  19   0  308.67   27.40
  -5  19   0  316.27   28.10
  -7  19   0   58.09   24.20
   7  19   0   90.89   21.90
  -9  19   0  174.78   27.90
 -11 -19   0   30.30   17.90
 -11  19   0   76.39   26.70
 -13 -19   0   31.90   19.00
 -13  19   0  -10.80   27.10
 -15 -19   0   94.89   25.20
 -15  19   0   78.49   25.70
 -17 -19   0    3.00   26.50
 -17  19   0  -21.30   33.10
 -19 -19   0    7.20   31.10
 -19  19   0   30.30   37.00
 -21 -19   0  -15.40   34.60
 -21  19   0   10.00   38.90
   0  20   0   13.30   38.40
  -2  20   0   41.40   24.50
   2  20   0   -5.70   24.00
   4  20   0   88.99   23.80
  -4  20   0   93.79   24.50
   6  20   0   81.09   23.60
  -6  20   0   45.70   24.50
  -8  20   0  270.57   29.60
 -10  20   0   26.70   27.10
 -12  20   0   10.10   28.70
 -14 -20   0   -5.50   24.00
 -14  20   0   -2.50   30.00
 -16 -20   0    7.00   23.20
 -16  20   0  -10.30   34.10
 -18 -20   0  127.09   31.40
 -18  20   0  148.49   36.30
 -20 -20   0  110.09   34.00
 -20  20   0   44.00   39.80
   1  21   0    6.10   24.90
  -1  21   0    0.00   22.90
   3  21   0  755.62   44.50
  -3  21   0  798.62   46.10
  -5  21   0  593.64   40.20
   5  21   0  497.15   40.70
   7  21   0   69.39   24.00
  -7  21   0   45.00   26.50
   9  21   0   13.10   24.20
  -9  21   0   58.39   26.90
 -11  21   0   62.59   29.00
 -13  21   0  -10.60   31.40
 -15 -21   0   80.89   27.00
 -15  21   0   66.69   32.60
 -17 -21   0   79.29   29.50
 -17  21   0  117.69   36.90
 -19 -21   0  -29.20   32.60
 -19  21   0   41.40   38.60
   0  22   0  669.93   42.80
  -2  22   0  207.28   30.40
   2  22   0  207.88   26.60
  -4  22   0   42.00   25.00
   4  22   0   50.49   26.40
   6  22   0   64.39   22.50
  -6  22   0   81.89   26.90
  -8  22   0   -1.60   28.00
   8  22   0   33.40   22.90
  10  22   0   31.10   26.40
 -10  22   0   19.30   28.50
 -12  22   0   21.60   31.10
 -14  22   0   79.99   34.00
 -16 -22   0   32.40   28.70
 -16  22   0   38.50   36.20
 -18 -22   0  187.88   34.10
 -18  22   0  160.48   41.00
   1  23   0  157.28   30.50
  -1  23   0  176.28   30.80
  -3  23   0   83.89   30.80
   3  23   0   72.09   28.00
   5  23   0  236.78   27.00
  -5  23   0  199.98   30.00
   7  23   0    3.60   26.20
  -7  23   0  -18.40   28.30
   9  23   0   60.29   27.50
  -9  23   0   75.49   29.80
  11  23   0   62.89   28.50
 -11  23   0   87.19   31.70
 -13  23   0  316.97   38.00
  13  23   0  203.38   28.90
 -15  23   0   24.80   37.20
 -17 -23   0   81.49   31.10
 -17  23   0  141.29   38.40
   0  24   0  128.29   28.70
  -2  24   0   -2.60   26.10
   2  24   0   -5.40   26.50
   4  24   0    5.40   25.90
  -4  24   0   36.20   27.80
   6  24   0   20.10   28.20
  -6  24   0   11.50   29.80
   8  24   0  -34.00   27.50
  -8  24   0   -9.30   31.00
  10  24   0   59.39   29.90
 -10  24   0  110.49   33.20
 -12  24   0   31.10   33.60
  12  24   0   29.60   29.00
  14  24   0  -21.80   30.70
 -14  24   0   13.60   38.20
 -16  24   0   43.40   39.60
   1  25   0   50.49   31.80
  -1  25   0   91.59   28.80
  -3  25   0   -8.10   32.50
   3  25   0   23.20   29.90
  -5  25   0   -6.90   30.80
  -7  25   0   59.49   31.40
   7  25   0   58.49   29.80
   9  25   0   14.40   29.80
  -9  25   0   51.19   32.60
  11  25   0  112.89   32.00
 -11  25   0  137.99   35.20
  13  25   0   37.50   31.50
 -13  25   0   47.60   37.80
  15  25   0   18.30   33.10
 -15  25   0   16.60   39.10
   0  26   0  950.30   60.99
  -2  26   0  358.86   36.30
   2  26   0  330.57   35.20
  -4  26   0   49.20   32.00
   4  26   0   96.29   32.40
  -6  26   0  -48.50   31.20
   6  26   0  -10.70   31.50
   8  26   0   16.70   31.00
  -8  26   0   28.60   38.20
  10  26   0  155.68   33.20
 -10  26   0  129.29   36.00
  12  26   0  166.58   30.20
 -12  26   0  162.48   38.80
  14  26   0   96.79   33.50
 -14  26   0   97.19   40.90
  -1  27   0  144.59   37.10
   1  27   0  122.89   32.70
   3  27   0   46.20   30.60
  -3  27   0   35.40   31.60
  -5  27   0    6.10   33.40
   5  27   0   31.90   29.30
  -7  27   0   -9.20   34.60
   7  27   0   -1.30   32.20
   9  27   0   17.50   29.10
  -9  27   0   12.00   34.70
  11  27   0   48.70   32.90
 -11  27   0   91.49   37.90
  13  27   0  -37.20   33.70
 -13  27   0  -16.30   41.00
   0  28   0  647.54   49.70
   2  28   0  106.49   32.90
  -2  28   0  113.59   35.10
  -4  28   0    0.40   34.20
   4  28   0   10.30   31.10
   6  28   0  114.79   31.50
  -6  28   0  113.09   36.90
   8  28   0   54.79   35.10
  -8  28   0   63.49   38.50
 -10  28   0  254.87   40.90
  10  28   0  166.98   32.10
 -12  28   0  376.76   45.90
  12  28   0  369.46   40.40
   1  29   0  -20.30   33.20
  -1  29   0   -3.50   34.30
   3  29   0   73.99   33.30
  -3  29   0  -27.70   35.40
   5  29   0  -45.20   36.90
  -5  29   0   23.10   35.80
  -7  29   0   61.09   37.00
   7  29   0   59.69   35.90
   9  29   0   16.30   35.20
  -9  29   0   55.09   40.80
 -11  29   0    2.80   40.40
  11  29   0   -4.80   31.70
   0  30   0   28.60   35.70
  -2  30   0   11.60   40.90
   2  30   0  -16.20   34.80
  -4  30   0  -22.40   37.40
   4  30   0   41.00   38.90
   6  30   0   12.70   33.50
  -6  30   0  -35.50   39.60
   8  30   0  125.09   39.10
  -8  30   0   51.69   47.20
 -10  30   0  187.08   46.10
  10  30   0  167.18   39.70
  -1  31   0    5.00   42.60
   1  31   0  -10.20   36.80
  -3  31   0   23.60   39.70
   3  31   0  -52.39   41.00
   5  31   0   -4.10   35.50
  -5  31   0   -6.50   39.40
   7  31   0   -1.50   39.20
  -7  31   0   45.30   42.30
  -9  31   0   52.39   43.80
   9  31   0   -2.60   39.30
   0  32   0  -21.70   44.40
  -2  32   0   21.70   40.00
   2  32   0    1.40   37.30
   4  32   0   13.00   36.00
  -4  32   0   22.50   47.80
   6  32   0   47.10   42.10
  -6  32   0   36.80   43.80
  -1  33   0  -26.00   40.90
   1  33   0  -15.10   40.70
 -24   0   1    0.30   31.40
 -22   0   1   46.90   24.60
 -20   0   1   -4.50   22.00
 -18   0   1   18.60   19.50
 -16   0   1   -1.20   19.10
 -14   0   1    7.70   15.00
 -12   0   1  -27.50   13.60
 -10   0   1  -14.10   14.20
  -8   0   1   16.00   10.40
  -6   0   1   10.10   10.40
  -4   0   1  -18.70    7.60
  -4   0  -1  -25.20    7.60
  -6   0  -1   -1.00    9.40
  -8   0  -1  135.79   13.60
 -10   0  -1  -16.30   12.80
 -12   0  -1   -5.40   14.80
 -14   0  -1    8.70   16.50
 -16   0  -1    5.20   17.30
 -18   0  -1   11.30   20.60
 -20   0  -1  -19.80   22.70
 -22   0  -1   16.70   25.50
 -24   0  -1   43.50   32.00
 -24   0  -1   35.80   29.30
 -25  -1   1   10.40   33.20
 -25   1   1    1.60   29.10
 -23  -1   1   37.50   26.30
 -23   1   1   53.59   30.00
 -21  -1   1   82.59   23.60
 -21   1   1   76.49   24.50
 -19  -1   1   -8.00   20.00
 -19   1   1    5.00   20.50
 -17  -1   1  151.28   20.20
 -17   1   1  163.08   20.60
 -15  -1   1  841.82   41.80
 -15   1   1  748.53   51.39
 -13  -1   1  158.08   18.00
 -13   1   1  144.99   17.80
 -11  -1   1  217.28   18.20
 -11   1   1  198.08   18.10
  -9  -1   1   30.70   11.30
  -9   1   1   55.39   12.80
  -7  -1   1  462.75   23.50
  -7   1   1  447.96   24.40
  -5  -1   1 1802.02   78.99
  -5   1   1 1812.52   79.39
  -3  -1   1  216.98   11.10
  -3   1   1  225.68   12.50
  -3  -1  -1 1086.09   49.60
  -3   1  -1 1175.28   49.99
  -5  -1  -1  159.88   13.00
  -5   1  -1  155.48   14.10
  -7  -1  -1   57.69   10.90
  -7   1  -1   57.39   11.90
  -9  -1  -1    4.40   12.00
  -9   1  -1    9.00   13.20
 -11  -1  -1   81.39   15.20
 -11   1  -1   86.49   15.70
 -13  -1  -1  100.89   16.70
 -13   1  -1   87.99   17.00
 -15  -1  -1  169.68   23.10
 -15   1  -1  193.98   20.70
 -17  -1  -1   11.60   19.40
 -17   1  -1    3.80   19.90
 -19  -1  -1   68.19   25.20
 -19   1  -1   80.09   22.40
 -21  -1  -1   18.50   24.00
 -21   1  -1   18.20   24.70
 -23  -1  -1   66.59   27.80
 -23  -1  -1   38.40   32.20
 -23   1  -1   22.60   30.80
 -25  -1  -1   19.70   31.20
 -25   1  -1   15.60   34.00
 -24  -2   1   37.50   36.20
 -24  -2   1   30.70   27.60
 -24   2   1   29.30   28.60
 -22  -2   1   50.39   32.60
 -22  -2   1   35.90   27.40
 -22   2   1   14.80   27.90
 -20   2   1   65.99   23.70
 -18  -2   1   87.09   20.10
 -18   2   1  124.19   21.60
 -16  -2   1  186.88   24.60
 -16   2   1  252.47   24.20
 -14  -2   1  140.29   18.40
 -14   2   1  134.69   18.30
 -12  -2   1   11.10   13.20
 -12   2   1    9.40   15.00
 -10  -2   1  206.78   17.40
 -10   2   1  195.18   17.60
  -8  -2   1  127.79   12.20
  -8   2   1  150.28   14.20
  -6  -2   1  966.30   43.80
  -6   2   1  960.30   45.20
  -4  -2   1  -10.60    6.20
  -4   2   1   -1.40    8.80
  -2  -2   1   -0.60    2.70
  -2  -2  -1   -0.10    4.60
  -4  -2  -1  711.03   34.40
  -4  -2  -1  740.63   33.70
  -4   2  -1  766.22   34.60
  -6  -2  -1   81.69   10.20
  -6   2  -1   69.09   11.80
  -8  -2  -1  507.05   27.10
  -8   2  -1  548.55   28.60
 -10  -2  -1  272.67   20.80
 -10   2  -1  303.17   20.10
 -12  -2  -1  105.49   15.90
 -12   2  -1   97.29   17.10
 -14  -2  -1   70.79   16.00
 -14   2  -1   76.39   20.50
 -16  -2  -1   12.40   17.40
 -16   2  -1    5.90   18.90
 -18  -2  -1   11.40   20.20
 -18   2  -1  -11.90   21.40
 -20  -2  -1   96.29   29.80
 -20  -2  -1  122.49   26.70
 -20   2  -1  121.29   25.10
 -22  -2  -1   17.40   26.00
 -22  -2  -1   36.20   32.00
 -22   2  -1   29.30   28.70
 -24  -2  -1   10.20   29.30
 -24   2  -1   -1.30   28.30
 -25  -3   1   20.60   28.80
 -25   3   1   24.70   33.70
 -23  -3   1   45.00   30.30
 -23  -3   1   67.19   35.20
 -23   3   1   31.00   28.00
 -21  -3   1   30.20   25.90
 -21  -3   1   68.79   33.70
 -21   3   1   60.79   25.10
 -19  -3   1    3.40   20.60
 -19  -3   1   17.40   29.50
 -19   3   1  -17.60   23.70
 -17  -3   1  868.81   46.70
 -17   3   1  846.32   46.40
 -15  -3   1  661.93   37.30
 -15   3   1  632.34   36.80
 -13  -3   1 1546.95   70.19
 -13   3   1 1503.45   70.59
 -11  -3   1   12.60   12.40
 -11   3   1    3.90   14.60
  -9  -3   1  365.46   21.00
  -9   3   1  355.56   23.80
  -7  -3   1  237.28   26.50
  -7  -3   1  248.58   15.40
  -7   3   1  248.48   18.50
  -5  -3   1 1842.22   85.89
  -5  -3   1 1882.71   82.19
  -5   3   1 1922.51   82.99
  -3  -3   1 3704.63  159.48
  -3  -3   1 3509.25  161.68
  -3   3   1 3880.51  160.08
   1  -3   1  778.82   39.20
  -5  -3  -1    6.10    8.80
  -5   3  -1    2.90   11.20
  -7  -3  -1  409.36   23.10
  -7  -3  -1  439.56   27.00
  -7   3  -1  436.06   25.00
  -9  -3  -1 1001.40   47.20
  -9  -3  -1  991.60   49.80
  -9   3  -1  981.60   47.50
 -11  -3  -1  135.09   16.90
 -11   3  -1  123.79   17.70
 -13  -3  -1  519.75   32.30
 -13   3  -1  538.35   32.10
 -15  -3  -1  488.75   39.60
 -15   3  -1  444.16   31.80
 -17  -3  -1  235.68   38.50
 -17  -3  -1  216.68   22.90
 -17   3  -1  239.68   24.80
 -19  -3  -1  103.39   28.50
 -19  -3  -1  120.69   23.10
 -19   3  -1  133.69   24.30
 -21  -3  -1   33.10   27.10
 -21  -3  -1   42.50   30.20
 -21   3  -1   44.70   25.60
 -23  -3  -1    4.70   32.20
 -23  -3  -1   -2.20   27.30
 -23   3  -1   18.90   28.70
 -25  -3  -1   -0.60   34.60
 -25   3  -1   53.09   30.80
 -24  -4   1   -2.60   36.00
 -24  -4   1   -0.30   30.40
 -24   4   1   -5.20   29.10
 -22  -4   1   64.79   34.80
 -22  -4   1   52.89   24.90
 -22   4   1   38.30   26.90
 -20  -4   1   76.19   32.00
 -20  -4   1   31.30   24.60
 -20   4   1   36.70   24.10
 -18  -4   1   28.10   27.60
 -18  -4   1   12.30   19.40
 -18   4   1    3.90   21.30
 -16  -4   1   14.00   24.90
 -16   4   1   -9.80   19.60
 -14  -4   1   44.90   23.20
 -14  -4   1   51.69   16.90
 -14   4   1   34.70   21.00
 -12  -4   1   53.39   20.70
 -12  -4   1   55.49   13.30
 -12   4   1   50.99   16.80
 -10  -4   1 1076.89   56.59
 -10  -4   1 1084.09   49.80
 -10   4   1 1084.69   51.69
  -8  -4   1   91.69   17.80
  -8  -4   1  119.49   11.30
  -8   4   1  112.49   15.30
  -6  -4   1  835.52   38.30
  -6  -4   1  837.82   44.30
  -6   4   1  872.41   40.50
  -4  -4   1    9.90   12.50
  -4  -4   1   10.00    6.40
  -4   4   1    8.50    8.40
  -2  -4   1  607.04   27.40
  -2   4   1  620.54   29.10
   0  -4   1 1235.98   56.79
  -2  -4  -1  118.59    8.80
  -2   4  -1   77.09    9.90
  -4  -4  -1  439.66   21.00
  -4   4  -1  398.36   21.50
  -6  -4  -1  544.65   29.20
  -6  -4  -1  550.04   25.70
  -6   4  -1  436.16   27.80
  -8  -4  -1  120.19   21.70
  -8  -4  -1  165.28   14.50
  -8   4  -1  140.09   15.80
 -10  -4  -1  228.48   26.40
 -10  -4  -1  219.58   19.20
 -10   4  -1  221.68   22.00
 -12  -4  -1   35.60   14.30
 -12  -4  -1   15.80   17.40
 -12   4  -1   26.40   16.20
 -14  -4  -1  131.39   21.60
 -14   4  -1  120.79   19.70
 -16  -4  -1  273.47   26.30
 -16  -4  -1  286.27   39.10
 -16   4  -1  274.07   25.00
 -18  -4  -1   18.30   21.00
 -18  -4  -1   21.60   25.30
 -18   4  -1   17.00   22.40
 -20  -4  -1   -0.50   22.60
 -20  -4  -1    6.20   29.00
 -20   4  -1  -45.00   23.70
 -22  -4  -1   -4.10   25.00
 -22  -4  -1   -5.20   31.70
 -22   4  -1   22.10   27.70
 -24  -4  -1    3.70   28.00
 -24   4  -1   18.60   30.20
 -25  -5   1   38.80   32.30
 -25   5   1   57.19   36.40
 -23  -5   1  -18.50   24.80
 -23  -5   1    4.70   37.00
 -23   5   1   -5.10   27.60
 -21  -5   1   19.30   33.60
 -21  -5   1    2.20   25.60
 -21   5   1   28.10   24.90
 -19  -5   1   37.70   22.70
 -19  -5   1   31.80   30.80
 -19   5   1   14.90   23.70
 -17  -5   1   14.00   26.10
 -17  -5   1    7.50   20.70
 -17   5   1    0.40   20.50
 -15  -5   1  239.38   22.60
 -15  -5   1  238.78   38.70
 -15   5   1  230.88   23.00
 -13  -5   1  725.73   48.10
 -13  -5   1  709.43   36.50
 -13   5   1  700.43   38.70
 -11  -5   1  798.72   48.60
 -11  -5   1  785.82   38.20
 -11   5   1  759.32   40.70
  -9  -5   1  462.05   36.50
  -9  -5   1  465.05   24.40
  -9   5   1  449.76   28.50
  -7  -5   1    1.90    8.10
  -7  -5   1   -4.80   14.70
  -7   5   1  -12.10   12.60
  -5  -5   1 1059.09   47.20
  -5  -5   1 1032.80   52.39
  -5   5   1 1083.69   49.00
  -3  -5   1  268.17   14.40
  -3   5   1  297.27   18.00
  -1   5  -1  189.88   13.30
  -5   5  -1   30.80   12.20
  -7  -5  -1   77.49   11.00
  -7   5  -1   99.89   14.60
  -9  -5  -1  401.46   30.60
  -9  -5  -1  403.36   23.50
  -9   5  -1  407.46   26.50
 -11  -5  -1 1324.07   62.19
 -11  -5  -1 1348.77   65.79
 -11   5  -1 1334.87   62.79
 -13  -5  -1  447.76   27.90
 -13  -5  -1  495.85   36.90
 -13   5  -1  417.76   31.20
 -15  -5  -1   14.30   21.70
 -15   5  -1    9.60   20.20
 -17  -5  -1  110.49   20.30
 -17  -5  -1  113.39   26.10
 -17   5  -1  126.79   23.50
 -19  -5  -1   -3.10   28.20
 -19  -5  -1    4.40   21.20
 -19   5  -1    0.20   23.10
 -21  -5  -1   -6.60   31.50
 -21  -5  -1   -9.60   23.50
 -21   5  -1   19.30   26.20
 -23  -5  -1   26.60   27.30
 -23   5  -1   34.90   30.20
 -25  -5  -1  -19.90   33.50
 -25   5  -1   65.49   38.00
 -24  -6   1   47.30   30.70
 -24  -6   1   39.70   57.29
 -24   6   1   81.49   30.70
 -22  -6   1   12.60   27.60
 -22  -6   1   -6.20   35.40
 -22   6   1   -6.20   27.00
 -20  -6   1  -11.60   24.40
 -20  -6   1   -1.20   31.70
 -20   6   1    1.20   25.40
 -18  -6   1  108.49   22.80
 -18  -6   1  101.59   30.70
 -18   6   1  106.39   26.90
 -16  -6   1    3.10   25.90
 -16   6   1  -10.60   20.70
 -14  -6   1   -4.20   16.60
 -14  -6   1   -6.20   22.40
 -14   6   1    9.00   18.40
 -12  -6   1  172.58   24.30
 -12  -6   1  211.68   18.10
 -12   6   1  167.08   20.20
 -10  -6   1  735.53   44.50
 -10  -6   1  723.53   36.30
 -10   6   1  722.03   38.70
  -8  -6   1   60.89   10.00
  -8  -6   1   59.89   17.30
  -8   6   1   59.79   15.60
  -6  -6   1  639.34   29.40
  -6  -6   1  608.14   37.70
  -6   6   1  649.64   32.80
  -4  -6   1 1085.19   58.39
  -4  -6   1 1202.58   52.59
  -4   6   1 1292.37   54.29
   2   6  -1 1197.28   52.19
  -2   6   1 1166.98   53.39
   0   6   1 1714.63   76.09
   0   6  -1 1743.73   75.99
  -2  -6  -1 1153.98   51.29
  -2   6  -1 1161.48   52.09
  -4  -6  -1   90.99    9.70
  -4   6  -1  112.69   13.20
  -6  -6  -1   10.90    9.20
  -6   6  -1    8.90   10.60
  -8  -6  -1  124.39   14.20
  -8   6  -1  106.69   16.50
 -10  -6  -1  731.43   43.40
 -10  -6  -1  734.83   36.20
 -10   6  -1  722.63   39.10
 -12  -6  -1  116.49   17.10
 -12  -6  -1   97.99   19.10
 -12   6  -1  116.49   19.10
 -14  -6  -1   -1.10   17.30
 -14  -6  -1    0.30   19.80
 -14   6  -1    8.20   18.60
 -16  -6  -1  159.58   20.80
 -16  -6  -1  172.78   26.10
 -16   6  -1  174.68   23.50
 -18  -6  -1  300.17   44.70
 -18  -6  -1  291.77   29.20
 -18   6  -1  308.97   29.20
 -20  -6  -1  173.78   32.90
 -20  -6  -1  183.18   24.80
 -20   6  -1  173.78   27.80
 -22  -6  -1    0.70   28.10
 -22  -6  -1  -53.89   32.50
 -22   6  -1  -20.60   28.10
 -24  -6  -1    7.50   28.10
 -24   6  -1   35.00   32.00
 -25  -7   1  151.08   34.70
 -25   7   1  143.59   34.10
 -23  -7   1  -62.09   39.00
 -23  -7   1    4.90   29.50
 -23   7   1   34.70   29.90
 -21  -7   1    7.20   25.90
 -21  -7   1    1.70   34.50
 -21   7   1   -7.80   26.30
 -19  -7   1    5.10   32.00
 -19  -7   1    7.20   22.50
 -19   7   1    9.90   23.60
 -17  -7   1    3.40   20.40
 -17  -7   1   15.50   28.60
 -17   7   1   -9.80   23.00
 -15  -7   1   -3.90   15.10
 -15  -7   1   -6.90   25.00
 -15   7   1  -22.00   19.70
 -13  -7   1  568.14   30.80
 -13  -7   1  565.94   45.60
 -11  -7   1  850.31   40.60
 -11  -7   1  857.91   52.09
 -11   7   1  830.02   44.10
  -9  -7   1  594.94   30.00
  -9  -7   1  640.64   43.40
  -9   7   1  575.44   34.10
  -7  -7   1  176.08   27.00
  -7  -7   1  146.89   12.30
  -7   7   1  135.69   14.00
  -5  -7   1   63.59    8.60
  -5  -7   1   64.59   17.50
  -5   7   1   68.29   13.70
  -1   7   1 1412.06   63.89
   1   7  -1 1444.36   63.39
  -1   7  -1 1933.21   86.39
   1   7   1 2001.90   86.59
  -3  -7  -1 1616.74   72.79
  -3   7  -1 1700.23   73.79
  -5  -7  -1  444.26   31.30
  -5  -7  -1  362.86   22.20
  -5   7  -1  395.46   24.30
  -9  -7  -1   29.40   12.00
  -9   7  -1  -16.30   16.10
 -11  -7  -1  471.05   28.40
 -11  -7  -1  449.16   35.70
 -11   7  -1  440.86   30.10
 -13  -7  -1  351.46   35.10
 -13  -7  -1  323.97   23.90
 -13   7  -1  301.17   28.30
 -15  -7  -1  -10.80   22.60
 -15   7  -1   -0.70   20.70
 -17  -7  -1   -2.20   19.00
 -17  -7  -1  -10.10   25.50
 -17   7  -1  -12.20   22.40
 -19  -7  -1   68.29   30.00
 -19  -7  -1   98.19   22.00
 -19   7  -1  125.99   26.10
 -21  -7  -1   41.00   27.80
 -21   7  -1   72.49   28.00
 -23  -7  -1   37.40   30.60
 -23   7  -1   56.89   31.20
 -25  -7  -1   95.09   36.30
 -25   7  -1  160.18   36.50
 -24  -8   1  149.88   29.90
 -24   8   1  144.59   34.20
 -22  -8   1  116.89   28.70
 -22  -8   1   65.49   38.20
 -22   8   1   73.79   30.70
 -20  -8   1   -9.20   24.50
 -20  -8   1    6.00   34.60
 -20   8   1   18.90   26.10
 -18  -8   1   -2.30   30.80
 -18  -8   1   -3.70   21.80
 -18   8   1  -24.90   24.00
 -16  -8   1   46.50   28.30
 -16   8   1   65.19   22.60
 -14  -8   1    2.90   14.50
 -14  -8   1   -6.40   24.90
 -14   8   1  -22.80   19.10
 -12  -8   1   -3.60   12.80
 -12  -8   1   10.00   21.90
 -12   8   1    8.20   18.30
 -10  -8   1  235.98   36.00
 -10  -8   1  212.88   19.50
 -10   8   1  213.08   21.50
  -8  -8   1  118.89   12.70
  -8   8   1  128.39   17.70
  -6  -8   1   61.99    9.70
  -6   8   1   37.40   14.70
  -4  -8   1 1450.75   61.89
  -4  -8   1 1241.18   68.89
  -4   8   1 1514.85   63.59
  -2   8   1  293.47   21.70
   2   8  -1  409.36   20.80
   0   8  -1 5176.08  221.98
   0   8   1 5082.99  222.18
  -2   8  -1 3176.68  138.39
  -4  -8  -1  815.72   41.00
  -4  -8  -1 1048.30   49.50
  -4   8  -1  831.12   42.70
 -10  -8  -1   32.60   13.00
 -10   8  -1    7.10   17.00
 -12  -8  -1   60.79   14.80
 -12  -8  -1   31.70   20.20
 -14  -8  -1  -15.80   21.70
 -14  -8  -1   25.70   16.10
 -14   8  -1    0.40   20.20
 -16  -8  -1  228.28   29.10
 -16  -8  -1  271.67   26.00
 -16   8  -1  298.27   27.50
 -18  -8  -1   13.60   28.30
 -18  -8  -1   73.69   24.30
 -18   8  -1   66.19   25.10
 -20  -8  -1   25.80   26.40
 -20   8  -1   15.60   26.30
 -22  -8  -1   11.10   26.30
 -22   8  -1   53.39   29.30
 -24  -8  -1   21.90   29.80
 -24   8  -1   27.90   33.90
 -23  -9   1  171.98   28.70
 -23  -9   1  -28.30   40.20
 -21  -9   1  132.79   29.00
 -21  -9   1   50.39   38.70
 -21   9   1  117.79   29.80
 -19  -9   1  -27.70   34.50
 -19  -9   1    4.70   24.10
 -19   9   1    2.00   25.50
 -17  -9   1  228.48   24.40
 -17  -9   1  159.68   33.10
 -17   9   1  217.68   27.70
 -15  -9   1  469.55   49.00
 -15  -9   1  472.15   32.40
 -15   9   1  508.25   35.40
 -13  -9   1  201.88   28.70
 -13  -9   1  256.27   23.20
 -13   9   1  249.48   24.30
 -11  -9   1  130.79   15.30
 -11  -9   1  109.39   24.40
 -11   9   1  118.29   20.10
  -9  -9   1  153.98   14.00
  -9   9   1  122.69   18.80
  -7  -9   1 1030.60   48.10
  -7   9   1 1081.29   51.19
  -5  -9   1  391.46   21.10
  -5   9   1  405.36   25.60
   3   9  -1 1970.80   86.09
  -3   9   1 1947.51   87.19
  -1  -9   1 1982.30   97.79
  -1   9   1 2142.49   91.09
   1   9  -1 2046.00   90.29
  -1   9  -1 6509.85  277.27
   1   9   1 6308.97  277.27
  -3  -9  -1  481.45   24.20
  -3   9  -1  402.16   25.40
 -11  -9  -1  474.95   42.20
 -11  -9  -1  455.55   27.00
 -11   9  -1  412.16   31.10
 -13  -9  -1   36.80   15.50
 -13  -9  -1  -14.70   22.90
 -13   9  -1   22.90   20.00
 -15  -9  -1   52.29   21.00
 -15  -9  -1   -8.30   25.10
 -15   9  -1   60.09   23.30
 -17  -9  -1   24.70   22.60
 -17   9  -1  -24.30   23.70
 -19  -9  -1  181.38   25.20
 -19   9  -1  202.08   29.40
 -21  -9  -1    8.30   25.60
 -21   9  -1   -0.80   28.90
 -23  -9  -1  146.59   33.20
 -23   9  -1  127.89   37.50
 -24 -10   1  148.79   35.00
 -24  10   1  131.99   34.60
 -22 -10   1  171.38   31.60
 -22  10   1  182.68   32.80
 -20 -10   1    8.80   23.40
 -20  10   1    9.00   28.70
 -18 -10   1    6.30   23.20
 -18 -10   1  -46.20   32.70
 -18  10   1   -6.30   24.90
 -16 -10   1  155.98   38.00
 -16 -10   1  106.79   31.90
 -16  10   1  107.89   24.80
 -14 -10   1  -17.30   27.30
 -14 -10   1   -2.20   15.40
 -14  10   1   -4.40   21.60
 -12 -10   1  488.55   48.00
 -12 -10   1  579.44   29.70
 -12  10   1  563.54   35.20
 -10 -10   1  276.57   38.00
 -10 -10   1  247.18   20.20
 -10  10   1  226.58   22.90
  -6 -10   1  695.53   33.90
  -6  10   1  717.53   37.80
  -2  10   1  786.52   39.00
   2  10  -1  789.32   37.30
   0  10   1  597.34   31.70
   0  10  -1  628.54   32.20
  -2  10  -1   63.19   13.40
   2  10   1   48.40   13.00
  -4 -10  -1  324.17   19.20
  -4  10  -1  307.77   22.70
 -10 -10  -1  223.78   19.10
 -10  10  -1  197.28   21.90
 -12 -10  -1  602.74   31.70
 -12 -10  -1  496.45   47.70
 -12  10  -1  588.94   35.90
 -14 -10  -1    3.70   19.40
 -14 -10  -1  -42.80   26.00
 -14  10  -1    2.20   20.80
 -16 -10  -1   25.40   19.40
 -16  10  -1    8.30   23.60
 -18 -10  -1   22.20   21.90
 -18  10  -1   19.00   26.90
 -20 -10  -1   19.20   27.30
 -20  10  -1   12.40   28.70
 -22 -10  -1  118.99   29.20
 -22  10  -1  132.69   33.90
 -24 -10  -1   86.99   35.00
 -24  10  -1   72.59   35.20
 -23 -11   1  215.28   30.90
 -23  11   1  149.49   35.90
 -21 -11   1   92.39   28.90
 -21  11   1   95.29   31.70
 -19 -11   1  227.28   25.90
 -19  11   1  208.68   31.30
 -17 -11   1  204.38   39.10
 -17 -11   1  275.57   27.00
 -17  11   1  310.47   29.40
 -15 -11   1  456.35   31.50
 -15 -11   1  306.27   52.59
 -15  11   1  481.95   30.90
 -13 -11   1  859.61   63.09
 -13 -11   1  981.80   45.40
 -13  11   1  956.10   49.99
 -11 -11   1  448.26   24.90
 -11 -11   1  402.86   48.90
 -11  11   1  413.16   31.20
  -9 -11   1   43.20   12.40
  -9  11   1   22.40   17.90
  -1  11   1 3517.05  153.58
   1  11  -1 3502.25  152.98
   1  11   1 1997.10   87.79
  -1  11  -1 1944.61   87.59
   3  11   1 1442.16   65.09
  -3  11  -1 1420.46   65.49
  -5 -11  -1  164.28   15.00
  -5  11  -1  110.89   18.50
  -9 -11  -1  696.33   35.00
  -9  11  -1  696.53   38.80
 -11 -11  -1  346.67   46.60
 -11 -11  -1  294.87   22.70
 -11  11  -1  331.77   28.70
 -13 -11  -1  270.57   47.40
 -13 -11  -1  357.56   25.00
 -13  11  -1  316.17   30.10
 -15 -11  -1  467.85   32.90
 -15 -11  -1  342.27   53.69
 -15  11  -1  425.36   35.70
 -17 -11  -1   15.90   21.10
 -17  11  -1   28.80   25.60
 -19 -11  -1    0.50   26.90
 -19  11  -1   -8.20   29.40
 -21 -11  -1   81.19   27.70
 -21  11  -1   56.99   31.10
 -23 -11  -1  120.89   34.90
 -23  11  -1  127.99   35.90
 -24 -12   1  270.87   39.30
 -24  12   1  272.87   44.60
 -22 -12   1  285.27   35.40
 -22  12   1  294.57   37.60
 -20 -12   1  -30.90   27.10
 -20  12   1   -6.70   29.40
 -18 -12   1   12.50   23.90
 -18  12   1   -1.60   27.40
 -16 -12   1  -22.80   35.30
 -16 -12   1   68.59   21.20
 -16  12   1   57.69   25.10
 -14 -12   1   71.99   32.90
 -14 -12   1  115.69   17.20
 -14  12   1  111.19   24.30
 -12 -12   1  406.56   27.30
 -12 -12   1  374.76   53.39
 -12  12   1  450.55   32.90
 -10 -12   1  149.49   31.70
 -10 -12   1  141.79   15.50
   0  12  -1   15.50   13.80
   0  12   1   32.20   15.20
  -2  12  -1  197.88   18.30
   2  12   1  200.78   20.00
  -4  12  -1  491.45   30.00
  -6 -12  -1 1267.37   58.59
  -6  12  -1 1317.67   61.29
 -10 -12  -1  139.29   34.30
 -10 -12  -1   23.40   13.70
 -10  12  -1   20.60   18.60
 -12 -12  -1  301.57   50.59
 -12 -12  -1  268.97   25.60
 -12  12  -1  270.17   26.40
 -14 -12  -1  231.98   38.30
 -14  12  -1  221.28   27.10
 -16 -12  -1  -19.20   36.20
 -16 -12  -1   46.80   22.50
 -16  12  -1   48.00   25.80
 -18 -12  -1   62.59   26.20
 -18  12  -1   29.20   27.50
 -20 -12  -1   18.80   28.50
 -20  12  -1    6.50   29.90
 -22 -12  -1  239.18   36.20
 -22  12  -1  210.28   36.80
 -23 -13   1  407.96   39.50
 -23  13   1  364.86   42.70
 -21 -13   1  125.59   28.30
 -21  13   1  169.58   38.20
 -19 -13   1   36.50   26.20
 -19  13   1   27.10   30.50
 -17 -13   1  322.17   29.20
 -17  13   1  306.07   32.60
 -15 -13   1   73.49   38.60
 -15 -13   1   88.99   31.00
 -15  13   1  118.99   26.00
 -13 -13   1  711.33   37.70
 -13 -13   1  642.64   59.89
 -13  13   1  680.33   42.80
 -11 -13   1  873.81   42.40
 -11 -13   1  833.02   61.89
 -11  13   1  848.12   46.70
  -9 -13   1  864.01   60.69
  -9 -13   1  796.32   40.30
   5  13  -1 1582.04   71.89
  -5  13   1 1574.04   73.19
   1  13  -1 4452.85  191.98
  -1  13   1 4359.66  192.48
   1  13   1 2476.15  108.89
  -1  13  -1 2425.66  109.39
  -3  13  -1   88.29   17.80
   3  13   1  142.19   18.90
  -5  13  -1   -0.50   17.00
  -7 -13  -1  565.64   30.80
  -7  13  -1  549.65   33.90
  -9 -13  -1  717.33   38.30
  -9 -13  -1  847.22   57.19
 -11 -13  -1 1402.46   62.79
 -11 -13  -1 1211.08   78.99
 -11  13  -1 1459.85   66.19
 -13 -13  -1  554.84   32.70
 -13 -13  -1  558.94   61.79
 -13  13  -1  519.75   38.40
 -15 -13  -1   51.99   41.90
 -15 -13  -1   79.69   22.40
 -15  13  -1   82.09   25.70
 -17 -13  -1  151.28   26.40
 -17  13  -1  144.79   24.40
 -19 -13  -1   67.09   28.60
 -19  13  -1   43.70   30.20
 -21 -13  -1  350.86   34.80
 -21  13  -1  352.06   39.30
 -23 -13  -1  310.67   36.40
 -23  13  -1  291.47   41.00
 -22 -14   1  227.88   36.30
 -22  14   1  228.38   38.40
 -20 -14   1    7.50   25.40
 -20  14   1   27.70   32.10
 -18 -14   1   17.40   24.80
 -18  14   1   29.80   28.90
 -16 -14   1   -6.70   18.80
 -16 -14   1  -59.39   42.80
 -16  14   1    7.40   27.10
 -14 -14   1   17.30   40.00
 -14 -14   1   -2.10   18.20
 -14  14   1   12.00   24.10
 -12 -14   1  106.49   17.80
 -12 -14   1  155.88   41.60
 -12  14   1  119.49   24.50
 -10 -14   1  102.09   39.80
 -10 -14   1   -3.20   14.00
 -10  14   1   -4.20   19.70
  -8  14   1  -25.00   33.20
  -2  14   1  145.29   20.10
   2  14  -1  177.38   17.40
   0  14  -1  102.99   16.80
   0  14   1  108.79   18.60
  -2  14  -1  131.19   18.00
   2  14   1  133.49   18.00
  -4  14  -1 1003.90   50.29
   4  14   1 1033.20   49.20
  -6 -14  -1   12.10   12.40
  -6  14  -1   27.20   18.10
  -8 -14  -1   18.60   13.10
  -8  14  -1   -8.40   22.10
 -10 -14  -1   -2.20   16.10
 -10  14  -1    0.10   20.00
 -12 -14  -1   75.79   16.80
 -12  14  -1   59.49   23.30
 -14 -14  -1  229.08   46.90
 -14 -14  -1  210.68   23.60
 -14  14  -1  164.18   28.10
 -16 -14  -1  115.09   24.40
 -16  14  -1  145.29   28.10
 -18 -14  -1   -9.80   26.40
 -18  14  -1  -14.60   28.60
 -20 -14  -1  -13.20   30.20
 -20  14  -1   -8.70   31.30
 -22 -14  -1   71.39   34.40
 -22  14  -1   55.09   36.20
 -21 -15   1   87.39   31.80
 -21  15   1   58.79   34.70
 -19 -15   1  101.59   28.20
 -19  15   1  116.69   32.10
 -17 -15   1  180.28   23.40
 -17  15   1  160.78   30.50
 -15 -15   1  150.08   49.90
 -15 -15   1  197.68   22.80
 -15  15   1  197.28   29.00
 -13 -15   1  660.03   71.69
 -13 -15   1  548.55   34.50
 -13  15   1  528.25   40.50
 -11 -15   1  971.20   71.59
 -11 -15   1  923.21   46.70
 -11  15   1  945.61   48.60
  -9 -15   1  184.38   44.20
  -9 -15   1   63.69   13.30
  -9  15   1  107.89   21.90
  -7 -15   1  468.45   58.69
  -3  15   1 1591.34   74.19
   3  15  -1 1595.44   72.59
   1  15  -1  792.22   41.20
  -1  15   1  825.32   42.60
   1  15   1  989.10   49.40
  -1  15  -1 1007.70   49.30
   3  15   1  253.87   22.80
  -3  15  -1  261.27   24.30
  -5  15  -1   96.19   19.70
   5  15   1  120.09   19.50
  -7 -15  -1  288.17   21.50
  -7  15  -1  314.87   27.90
  -9 -15  -1  704.03   36.50
  -9  15  -1  717.93   41.50
 -11 -15  -1 1344.77   64.69
 -11 -15  -1 1448.56   83.59
 -11  15  -1 1396.26   68.49
 -13 -15  -1  296.57   24.60
 -13  15  -1  269.97   30.20
 -15 -15  -1  147.69   23.80
 -15 -15  -1  156.28   52.29
 -15  15  -1  142.29   28.70
 -17 -15  -1  141.99   24.70
 -17  15  -1  150.98   30.10
 -19 -15  -1   79.79   30.10
 -19  15  -1   41.50   32.70
 -21 -15  -1   82.69   29.80
 -21  15  -1  102.79   36.50
 -22 -16   1   14.60   34.60
 -22  16   1    3.50   35.90
 -20 -16   1   26.50   30.20
 -20  16   1  -10.80   34.40
 -18 -16   1   13.10   25.00
 -18  16   1   39.70   30.70
 -16 -16   1   -8.20   19.50
 -16  16   1    6.20   27.80
 -14 -16   1   39.90   52.19
 -14  16   1  -11.80   24.90
 -12 -16   1  186.18   18.40
 -12  16   1  174.98   26.50
 -10 -16   1   39.60   13.80
 -10  16   1   24.50   22.50
  -8  16   1  257.27   25.90
   4  16  -1   27.80   17.50
  -4  16   1   36.20   19.90
   2  16  -1    3.60   18.50
  -2  16   1  -16.00   18.60
   0  16  -1  404.26   30.90
   0  16   1  410.86   29.50
  -2  16  -1  266.77   25.10
   2  16   1  284.47   24.80
   4  16   1  164.58   21.60
  -4  16  -1  139.79   20.20
  -6  16  -1  158.68   22.20
  -8 -16  -1   15.20   16.40
  -8  16  -1   20.80   21.30
 -10 -16  -1    7.40   15.20
 -10  16  -1   -9.00   21.70
 -12 -16  -1   64.29   21.60
 -12  16  -1   56.89   24.40
 -14 -16  -1   97.59   56.59
 -14 -16  -1   18.00   21.80
 -14  16  -1   -5.80   26.70
 -16 -16  -1  -15.40   24.20
 -16  16  -1  -21.10   28.70
 -18 -16  -1  203.68   27.40
 -18  16  -1  172.58   33.20
 -20 -16  -1    2.90   32.10
 -20  16  -1   27.40   34.60
 -22 -16  -1   12.40   32.40
 -22  16  -1   -1.30   37.90
 -21 -17   1  166.98   33.80
 -21  17   1  170.88   39.10
 -19 -17   1   54.69   28.20
 -19  17   1   67.59   33.60
 -17 -17   1   82.39   26.00
 -17  17   1  129.69   33.00
 -15 -17   1  204.68   24.20
 -15 -17   1  104.79   62.19
 -15  17   1  191.08   30.60
 -13 -17   1 1026.40   82.49
 -13  17   1  962.10   56.49
 -11 -17   1  985.00   79.39
 -11 -17   1  855.21   45.80
 -11  17   1  893.51   50.89
  -9  17   1  487.35   36.60
   5  17  -1   15.80   18.50
  -5  17   1   54.69   36.20
   3  17  -1  236.68   21.50
  -3  17   1  280.97   24.90
   1  17  -1  512.45   35.00
  -1  17   1  539.15   34.30
   1  17   1  664.43   37.10
  -1  17  -1  593.94   36.30
   3  17   1  476.45   31.50
  -3  17  -1  495.55   32.30
   5  17   1   11.60   18.10
  -5  17  -1   20.70   23.40
  -7  17  -1  100.89   22.50
  -9 -17  -1  635.34   36.90
  -9  17  -1  665.33   40.80
 -11 -17  -1  644.04   54.99
 -11  17  -1  792.92   45.70
 -13 -17  -1  583.54   36.90
 -13  17  -1  501.25   35.60
 -15 -17  -1  128.59   24.90
 -15  17  -1  137.89   29.80
 -17 -17  -1    8.00   27.10
 -17  17  -1   19.80   31.40
 -19 -17  -1   59.89   30.80
 -19  17  -1   57.49   33.30
 -21 -17  -1    0.40   34.40
 -21  17  -1   61.89   37.30
 -20 -18   1    1.50   31.20
 -20  18   1   20.00   36.30
 -18 -18   1    6.50   27.40
 -18  18   1   -3.70   33.50
 -16 -18   1    5.10   23.80
 -16  18   1   82.09   29.80
 -14 -18   1  -22.00   98.89
 -14 -18   1    6.80   20.50
 -14  18   1   26.20   27.90
 -12 -18   1  279.97   69.29
 -12 -18   1   42.50   22.20
 -12  18   1   16.90   26.90
 -10  18   1  386.16   31.00
  -6  18   1  220.48   26.20
   6  18  -1  217.48   21.20
  -4  18   1   91.49   22.80
   4  18  -1   67.19   17.90
   2  18  -1   25.60   18.30
  -2  18   1   39.00   21.10
   0  18  -1  104.79   19.90
   2  18   1  545.75   34.80
  -2  18  -1  573.84   34.80
   4  18   1   48.40   19.30
  -6  18  -1   22.10   21.50
   6  18   1    5.70   17.70
  -8  18  -1   -3.00   23.20
 -10 -18  -1   27.20   23.90
 -10  18  -1   35.00   24.30
 -12 -18  -1   28.60   20.50
 -12  18  -1   32.00   26.90
 -14 -18  -1   -1.80   23.10
 -14  18  -1    1.20   28.40
 -16 -18  -1  111.39   24.70
 -16  18  -1   91.69   31.40
 -18 -18  -1   57.59   26.50
 -18  18  -1   80.29   34.70
 -20 -18  -1    1.00   33.30
 -20  18  -1  -13.80   39.80
 -21 -19   1   67.69   35.10
 -21  19   1   85.19   39.30
 -19 -19   1   33.00   29.00
 -19  19   1   68.29   35.80
 -17 -19   1   83.19   26.80
 -17  19   1  173.08   34.80
 -15 -19   1  366.56   32.40
 -15 -19   1  184.58   74.99
 -15  19   1  341.17   36.10
 -13 -19   1  399.16   32.80
 -13 -19   1  491.85   83.79
 -13  19   1  400.56   40.20
 -11  19   1  800.42   49.40
  -9  19   1  625.14   43.60
   9  19  -1  641.84   39.10
   7  19  -1  172.48   20.80
  -7  19   1  136.09   26.30
  -5  19   1  288.57   28.20
   5  19  -1  307.27   29.40
   3  19  -1  264.17   26.30
  -3  19   1  293.67   26.60
   1  19  -1   72.19   20.00
  -1  19  -1  233.08   26.00
   1  19   1  224.88   24.20
   3  19   1  152.58   22.20
   5  19   1   35.10   19.60
  -5  19  -1    4.20   21.90
  -7  19  -1  326.47   29.70
   7  19   1  332.27   28.50
  -9  19  -1  344.77   31.70
 -11 -19  -1 1068.99   55.39
 -11  19  -1 1098.99   59.29
 -13 -19  -1  385.66   30.40
 -13  19  -1  341.67   34.50
 -15 -19  -1   88.69   23.70
 -15  19  -1   96.39   31.30
 -17 -19  -1   47.30   29.10
 -17  19  -1   81.79   33.90
 -19 -19  -1  -23.60   32.30
 -19  19  -1   10.40   36.70
 -21 -19  -1   31.10   37.60
 -21  19  -1   92.49   43.60
 -20 -20   1   16.70   32.30
 -20  20   1   45.70   39.60
 -18 -20   1   43.80   29.00
 -18  20   1   52.69   36.80
 -16 -20   1  -30.70   24.40
 -16  20   1   51.79   32.80
 -14 -20   1 -128.79   79.29
 -14 -20   1   18.30   22.20
 -14  20   1  -11.60   29.60
 -12 -20   1  544.25   88.29
 -10  20   1   97.59   29.20
  -8  20   1   12.80   26.10
   8  20  -1   11.50   21.60
  -6  20   1  -19.80   24.40
   6  20  -1   24.20   19.10
   4  20  -1    2.40   19.70
  -4  20   1    2.70   23.70
   2  20  -1   -1.70   20.00
  -2  20   1    2.30   22.90
   0  20  -1   58.49   22.10
   0  20   1  116.39   23.10
  -2  20  -1   17.50   21.50
  -4  20  -1   -6.50   24.60
   6  20   1  -10.70   27.90
  -6  20  -1    2.70   23.00
  -8  20  -1   47.70   24.80
   8  20   1   45.40   23.80
 -10  20  -1  590.34   43.10
 -12 -20  -1   99.19   21.20
 -12  20  -1   88.09   30.80
 -14 -20  -1   -3.20   24.30
 -14  20  -1   -2.30   30.30
 -16 -20  -1  106.59   25.30
 -16  20  -1   90.49   32.70
 -18 -20  -1  176.38   30.10
 -18  20  -1  178.18   38.80
 -20 -20  -1  -49.50   35.70
 -20  20  -1  -23.80   37.60
 -19 -21   1  128.39   32.40
 -19  21   1  123.49   44.60
 -17 -21   1  106.09   28.60
 -17  21   1  122.29   38.10
 -15 -21   1  137.49   26.30
 -15  21   1  185.58   34.70
 -13  21   1  267.27   34.70
 -11  21   1  433.96   41.50
  11  21  -1  408.46   32.10
  -9  21   1  103.09   28.00
   9  21  -1   45.10   29.10
  -7  21   1  417.26   37.40
   7  21  -1  368.66   36.40
   5  21  -1  123.79   25.60
  -5  21   1  125.99   26.70
   3  21  -1  342.87   32.80
  -3  21   1  362.26   33.60
  -1  21   1  512.65   37.70
   1  21  -1  484.15   40.30
  -1  21  -1   76.89   22.30
   1  21   1   70.39   23.40
   3  21   1   57.69   22.30
  -3  21  -1   75.89   23.50
  -5  21  -1   15.40   24.60
   5  21   1   28.10   21.90
   7  21   1  466.55   34.80
  -7  21  -1  475.55   39.00
  -9  21  -1  193.48   29.80
   9  21   1  180.98   25.00
 -11  21  -1 1003.00   57.99
 -13 -21  -1  346.57   30.70
 -13  21  -1  352.36   34.80
 -15 -21  -1  130.99   28.80
 -15  21  -1  162.88   34.20
 -17 -21  -1   -7.60   30.30
 -17  21  -1   30.70   36.20
 -19 -21  -1  122.69   35.90
 -19  21  -1  148.09   39.70
 -18 -22   1   -8.80   30.90
 -18  22   1   30.60   38.00
 -16  22   1   28.40   35.30
 -14  22   1   52.69   33.90
  12  22  -1   47.90   25.40
 -12  22   1   76.79   31.90
  10  22  -1   -3.00   25.10
 -10  22   1  -20.30   28.40
  -8  22   1   30.40   29.20
   8  22  -1   41.30   24.00
   6  22  -1   -0.40   24.40
  -6  22   1   30.60   26.60
   4  22  -1   33.20   25.30
  -4  22   1   39.50   26.10
   2  22  -1   26.60   23.00
  -2  22   1   14.60   25.00
   0  22   1   -2.80   25.30
   0  22  -1   23.00   26.30
   2  22   1   23.10   23.90
  -2  22  -1    3.70   23.90
   4  22   1   47.40   26.70
  -4  22  -1    5.20   24.70
  -6  22  -1  226.08   29.10
   6  22   1  181.38   26.00
   8  22   1   86.99   27.10
  -8  22  -1   68.69   28.60
 -10  22  -1   -1.90   28.10
  10  22   1   11.00   23.90
 -12  22  -1   23.60   31.30
 -14  22  -1   50.39   34.60
 -16 -22  -1   -0.20   29.90
 -16  22  -1   -3.40   35.50
 -18 -22  -1  -36.80   33.20
 -18  22  -1   13.40   38.40
 -17  23   1  117.59   39.90
 -15  23   1   61.19   34.80
  13  23  -1  248.88   31.50
 -13  23   1  251.47   37.50
  11  23  -1  398.76   38.80
 -11  23   1  453.85   44.80
  -9  23   1  596.64   47.00
   9  23  -1  627.54   43.40
   7  23  -1  401.56   37.70
  -7  23   1  414.36   37.40
   5  23  -1 1209.78   65.09
  -5  23   1 1272.87   66.29
   3  23  -1  731.13   48.40
  -3  23   1  787.92   52.19
   1  23  -1  302.77   30.00
  -1  23   1  317.77   35.20
   1  23   1  331.57   34.50
  -1  23  -1  331.87   30.40
   3  23   1  375.66   34.90
  -3  23  -1  369.36   32.90
   5  23   1  832.82   47.90
  -5  23  -1  796.32   50.09
   7  23   1  476.85   41.20
  -7  23  -1  478.05   41.80
   9  23   1  988.90   54.79
  -9  23  -1 1044.00   59.49
  11  23   1  611.84   41.50
 -11  23  -1  591.94   47.60
 -13  23  -1  236.98   37.50
 -15  23  -1  109.39   36.30
 -17 -23  -1   66.39   33.50
 -17  23  -1  151.88   41.80
 -16  24   1   76.69   39.50
 -14  24   1   69.99   36.20
  14  24  -1   76.79   29.80
  12  24  -1   31.60   29.10
 -12  24   1   29.00   32.80
 -10  24   1   62.29   32.40
  10  24  -1   26.40   28.00
  -8  24   1   17.20   30.30
   8  24  -1    6.10   26.70
  -6  24   1    6.10   30.60
   6  24  -1   -5.40   27.60
   4  24  -1  172.38   30.30
  -4  24   1  216.68   31.30
   2  24  -1  217.88   28.60
  -2  24   1  232.68   31.30
   0  24  -1    8.90   26.20
   0  24   1   30.60   27.80
   2  24   1  211.78   29.80
  -2  24  -1  203.08   29.80
  -4  24  -1  -24.60   31.20
   4  24   1  -14.10   26.20
   6  24   1  143.29   30.80
  -6  24  -1  146.09   31.00
  -8  24  -1  -23.10   30.10
   8  24   1   33.50   25.50
  10  24   1   61.99   26.70
 -10  24  -1   77.69   31.90
 -12  24  -1    5.50   34.30
  12  24   1   25.60   30.50
 -14  24  -1   62.19   35.70
 -16  24  -1   77.29   41.20
 -15  25   1   17.30   39.90
  15  25  -1  -16.20   30.90
 -13  25   1  218.78   39.50
  13  25  -1  186.98   32.40
 -11  25   1  348.37   40.50
  11  25  -1  386.66   35.90
   9  25  -1  552.64   44.30
  -9  25   1  567.34   49.30
   7  25  -1  396.96   36.10
  -7  25   1  384.96   38.50
   5  25  -1  337.57   35.00
  -5  25   1  410.26   38.30
   3  25  -1  417.16   37.80
  -3  25   1  408.86   37.50
  -1  25   1  415.46   41.60
   1  25  -1  438.46   44.50
  -1  25  -1   75.69   28.40
   1  25   1   65.29   32.40
  -3  25  -1  123.09   33.70
   3  25   1  109.39   29.20
  -5  25  -1  175.78   32.10
   5  25   1  141.29   28.50
  -7  25  -1  243.58   35.10
   7  25   1  220.88   30.10
  -9  25  -1  684.03   49.99
   9  25   1  609.94   44.00
 -11  25  -1  213.38   37.10
  11  25   1  234.38   30.90
 -13  25  -1  145.29   37.40
  13  25   1  135.59   30.20
  15  25   1   14.90   33.50
 -15  25  -1   92.39   40.50
  16  26  -1   27.40   34.70
 -14  26   1   47.60   39.90
  14  26  -1   22.60   33.10
 -12  26   1   47.50   37.10
  12  26  -1   26.00   31.00
 -10  26   1  133.79   37.80
  10  26  -1  134.59   31.10
  -8  26   1   33.50   34.30
   8  26  -1   27.30   29.90
  -6  26   1  -12.10   32.70
   6  26  -1  -41.30   31.10
  -4  26   1   39.90   32.50
   4  26  -1   32.10   31.00
   2  26  -1   19.90   28.20
  -2  26   1   64.99   30.90
   0  26  -1   30.70   31.70
   0  26   1   -0.80   33.30
  -2  26  -1   29.40   29.90
   2  26   1  -14.10   29.70
   4  26   1   18.70   28.50
  -4  26  -1    7.60   30.30
   6  26   1   14.20   32.70
  -6  26  -1  -12.50   31.20
  -8  26  -1   35.60   33.20
   8  26   1   53.59   32.00
  10  26   1   49.30   32.30
 -10  26  -1   58.39   35.50
 -12  26  -1  -18.90   35.90
  12  26   1  -26.30   33.70
 -14  26  -1   66.09   39.90
  14  26   1   74.39   35.70
 -13  27   1   19.10   45.20
  13  27  -1  -11.50   34.80
 -11  27   1  181.68   40.20
  11  27  -1  108.59   32.70
  -9  27   1  427.46   44.70
   9  27  -1  348.27   37.30
  -7  27   1   90.59   37.00
   7  27  -1   89.49   32.60
  -5  27   1  318.77   40.10
   5  27  -1  313.07   34.00
  -3  27   1  194.98   35.50
   3  27  -1  190.68   31.70
   1  27  -1  292.07   34.00
  -1  27   1  350.56   40.40
   1  27   1  154.38   37.00
  -1  27  -1  172.08   36.70
   3  27   1   45.90   30.80
  -3  27  -1   37.50   35.90
  -5  27  -1  158.18   32.80
   5  27   1   24.60   30.80
  -7  27  -1  102.69   39.40
   7  27   1  125.39   30.80
  -9  27  -1  117.09   36.20
   9  27   1  115.79   33.80
  11  27   1   96.89   31.20
 -11  27  -1  138.59   39.20
 -13  27  -1   76.99   45.00
  13  27   1   64.09   35.20
  12  28  -1  -41.10   34.10
 -12  28   1   62.39   41.50
  10  28  -1   28.90   33.10
 -10  28   1   96.29   41.50
   8  28  -1  176.88   35.50
  -8  28   1  113.09   39.20
   6  28  -1  -15.00   29.50
  -6  28   1   20.60   36.00
   4  28  -1    8.90   30.70
  -4  28   1   22.50   39.70
  -2  28   1    6.30   37.20
   2  28  -1  -21.70   30.90
   0  28  -1   46.10   31.70
   0  28   1   32.90   38.30
   2  28   1   43.00   32.60
  -2  28  -1   39.90   32.50
   4  28   1    1.90   34.80
  -4  28  -1  -31.00   33.80
   6  28   1  -32.50   35.20
  -6  28  -1   -3.80   34.30
   8  28   1  188.98   36.60
  -8  28  -1  185.18   39.00
  10  28   1   15.70   34.60
 -10  28  -1   31.90   37.30
 -12  28  -1    2.80   39.60
 -11  29   1   91.39   43.30
  11  29  -1   87.19   35.70
   9  29  -1  160.18   36.00
  -9  29   1  203.88   48.80
   7  29  -1  228.58   38.40
  -7  29   1  215.58   42.20
  -5  29   1   11.00   38.90
   5  29  -1   33.00   36.00
   3  29  -1   41.40   32.30
  -3  29   1   82.99   36.90
  -1  29   1   11.00   35.80
   1  29  -1   54.49   32.50
   1  29   1  -10.40   33.70
  -1  29  -1   11.90   33.90
  -3  29  -1  -13.30   33.60
   3  29   1    6.20   38.70
   5  29   1  -25.90   36.90
  -5  29  -1   30.80   41.00
  -7  29  -1  137.19   38.90
   7  29   1   72.09   33.10
  -9  29  -1  129.79   40.40
   9  29   1  142.89   38.30
 -11  29  -1   35.80   41.30
  11  29   1   39.40   37.70
 -10  30   1   98.49   43.90
  10  30  -1   80.39   36.40
  -8  30   1  -28.80   42.50
   8  30  -1   21.40   37.20
   6  30  -1  -14.40   36.30
  -6  30   1  -19.00   39.20
  -4  30   1   10.70   38.10
   4  30  -1    5.50   38.00
   2  30  -1   -4.70   33.40
  -2  30   1    8.90   38.10
   0  30  -1  -18.60   34.50
   0  30   1   -4.40   35.80
  -2  30  -1    0.00   40.60
   2  30   1  -13.30   40.70
  -4  30  -1   -3.60   37.10
   4  30   1    6.70   33.70
  -6  30  -1   40.10   38.90
   6  30   1  -11.60   34.20
   8  30   1  141.09   38.80
  -8  30  -1  103.39   40.40
 -10  30  -1   77.29   41.50
  10  30   1    1.40   39.30
  -9  31   1  184.38   47.70
   9  31  -1  237.88   41.30
  -7  31   1  215.28   44.60
  -5  31   1   81.19   41.50
   5  31  -1  105.89   39.90
  -3  31   1   25.80   45.70
   3  31  -1   11.60   38.20
   1  31  -1   -3.00   35.90
  -1  31   1   45.80   38.60
   1  31   1  -36.60   36.70
  -1  31  -1   26.00   41.40
  -3  31  -1    9.80   38.00
   3  31   1  -13.50   40.50
  -5  31  -1   95.19   39.30
   5  31   1   86.49   37.20
  -7  31  -1   96.19   42.40
   7  31   1   71.69   36.30
   9  31   1   68.09   41.00
  -9  31  -1   91.39   42.60
   6  32  -1  -10.80   41.50
  -6  32   1    1.20   42.60
   4  32  -1   52.59   41.70
  -4  32   1   17.50   42.90
   2  32  -1  -32.20   35.90
  -2  32   1   33.40   45.90
   0  32   1  -19.10   39.50
   0  32  -1   15.20   42.90
  -2  32  -1  119.69   39.70
   2  32   1  115.09   45.20
   4  32   1   48.80   37.90
  -4  32  -1   79.79   41.60
  -6  32  -1   20.40   47.70
   6  32   1  -13.50   36.60
  -1  33   1  -28.80   47.70
   1  33  -1   51.19   44.80
  -1  33  -1  -20.60   40.20
   1  33   1  -21.50   40.70
 -24   0   2  481.75   45.70
 -22   0   2  261.67   28.10
 -20   0   2  216.78   25.20
 -18   0   2  567.44   39.00
 -16   0   2  699.13   41.20
 -14   0   2 2285.67  102.49
 -12   0   2 1331.07   61.29
 -10   0   2  480.65   26.50
  -8   0   2 1550.14   68.99
  -6   0   2   46.10    9.20
  -4   0   2   16.30    7.40
   2   0   2 1430.46   62.29
  -4   0  -2  580.84   27.90
  -6   0  -2  138.49   11.70
  -8   0  -2 1832.42   81.09
 -10   0  -2  690.43   35.80
 -12   0  -2 1908.81   86.19
 -14   0  -2  848.22   46.90
 -16   0  -2  382.76   29.80
 -18   0  -2 1146.59   57.99
 -20   0  -2  509.45   37.10
 -22   0  -2  626.44   44.00
 -24   0  -2  228.28   32.70
 -25  -1   2  276.07   44.30
 -25  -1   2  263.57   35.30
 -25   1   2  254.77   33.50
 -23  -1   2  324.17   35.20
 -23   1   2  379.46   35.20
 -21  -1   2  334.47   31.80
 -21   1   2  330.47   33.30
 -19  -1   2    7.90   20.30
 -19   1   2   12.00   23.20
 -17  -1   2  193.58   21.40
 -17   1   2  208.48   21.60
 -15  -1   2  231.48   22.20
 -13  -1   2  408.26   26.90
 -13   1   2  367.46   25.50
 -11  -1   2   10.40   12.10
 -11   1   2  -16.20   15.20
  -9  -1   2   64.59   11.50
  -9   1   2   59.59   14.20
  -7  -1   2  384.76   21.90
  -7   1   2  411.56   22.00
  -5  -1   2 1863.81   81.69
  -5   1   2 1873.81   81.89
  -3  -1   2  389.06   18.30
  -3   1   2  407.16   19.70
  -3  -1  -2 1426.26   63.49
  -3   1  -2 1461.95   63.59
  -5  -1  -2  239.08   15.50
  -5   1  -2  218.78   16.10
  -7  -1  -2  277.27   17.70
  -7   1  -2  235.38   16.00
  -9  -1  -2  163.48   15.50
  -9   1  -2  141.59   15.90
 -11  -1  -2  197.98   18.20
 -11   1  -2  218.28   18.50
 -13  -1  -2   37.80   15.60
 -13   1  -2   47.70   17.00
 -15  -1  -2  265.57   25.30
 -15   1  -2  269.67   26.10
 -17  -1  -2   91.49   20.90
 -17   1  -2   87.09   20.80
 -19  -1  -2    5.50   21.40
 -19   1  -2    9.50   25.10
 -21  -1  -2   80.09   25.10
 -21   1  -2  115.49   25.80
 -23  -1  -2  297.47   33.90
 -23  -1  -2  375.16   50.99
 -23   1  -2  336.87   37.30
 -25  -1  -2   63.09   31.30
 -25   1  -2  108.49   37.00
 -24  -2   2  229.68   32.90
 -24  -2   2  195.68   46.50
 -24   2   2  207.08   31.30
 -22  -2   2  204.48   29.40
 -22  -2   2  164.68   36.80
 -22   2   2  200.38   30.30
 -20  -2   2  143.79   25.50
 -20   2   2  158.38   23.90
 -18  -2   2   10.10   20.40
 -18   2   2   16.00   19.80
 -16  -2   2  813.12   44.80
 -16   2   2  839.62   43.70
 -14  -2   2 1188.98   55.39
 -14   2   2 1164.98   56.19
 -12  -2   2 1075.69   51.29
 -12   2   2 1076.39   51.39
 -10  -2   2  872.21   40.40
 -10   2   2  833.72   41.70
  -8  -2   2  219.58   16.80
  -8   2   2  241.28   20.10
  -6  -2   2  607.14   29.20
  -6   2   2  635.94   30.40
  -4  -2   2   16.50    5.90
  -4   2   2   31.40   10.00
  -2   2   2 4496.85  194.08
   2  -2   2 1749.22   69.99
  -2  -2  -2 1402.96   68.59
  -4  -2  -2 4638.14  208.18
  -4   2  -2 4992.90  208.28
  -6  -2  -2   71.99   10.70
  -6   2  -2   58.89   12.20
  -8  -2  -2  588.84   30.60
  -8   2  -2  617.44   31.60
 -10  -2  -2 2173.98   99.29
 -10   2  -2 2305.37   99.89
 -12  -2  -2    6.20   14.20
 -12   2  -2    6.20   15.50
 -14  -2  -2  414.06   27.60
 -14   2  -2  415.86   32.50
 -16  -2  -2  416.36   30.40
 -16   2  -2  443.56   31.60
 -18  -2  -2  975.70   51.79
 -18   2  -2  987.20   55.19
 -20  -2  -2  640.64   46.60
 -20  -2  -2  740.73   54.49
 -20   2  -2  603.34   43.20
 -22  -2  -2  416.56   39.00
 -22  -2  -2  462.65   52.49
 -22   2  -2  412.86   39.10
 -24  -2  -2  220.88   31.50
 -24   2  -2  206.28   33.00
 -25  -3   2   54.49   39.30
 -25  -3   2   39.40   32.80
 -25   3   2   48.90   33.20
 -23  -3   2  199.58   40.00
 -23  -3   2  216.78   31.40
 -23   3   2  224.08   29.60
 -21  -3   2  -19.00   21.70
 -21  -3   2   10.10   33.40
 -21   3   2   19.70   24.00
 -19  -3   2   30.50   29.00
 -19  -3   2  -26.50   19.60
 -19   3   2  -11.00   21.10
 -17  -3   2    0.90   19.50
 -17   3   2   10.10   19.60
 -15  -3   2   77.69   15.80
 -15   3   2   81.49   22.70
 -13  -3   2   91.49   14.40
 -13   3   2   81.89   17.00
 -11  -3   2   39.20   12.10
 -11   3   2   17.40   15.30
  -9  -3   2   27.70   10.00
  -9   3   2   -0.40   13.30
  -7  -3   2  152.58   12.10
  -7   3   2  161.18   14.60
  -5  -3   2  533.25   32.70
  -5  -3   2  573.74   25.80
  -5   3   2  546.25   27.80
  -3  -3   2 1327.37   63.49
  -3  -3   2 1362.96   59.39
  -3   3   2 1417.66   60.59
  -1  -3   2   38.00   11.90
  -1   3   2    7.00    6.20
   1  -3   2 1209.28   55.09
  -1  -3  -2 1223.88   53.19
  -3  -3  -2 1311.47   59.39
  -3   3  -2 1384.96   59.49
  -5  -3  -2  736.63   32.70
  -5  -3  -2  667.33   32.80
  -5   3  -2  679.13   33.90
  -7  -3  -2   51.19    9.50
  -7  -3  -2   50.99   11.20
  -7   3  -2   45.30   13.10
  -9  -3  -2   17.30   12.30
  -9  -3  -2   43.00   12.70
  -9   3  -2   20.60   14.60
 -11  -3  -2  142.39   24.90
 -11  -3  -2  167.48   16.80
 -11   3  -2  198.78   18.80
 -13  -3  -2    2.80   15.50
 -13  -3  -2    8.60   16.80
 -13   3  -2  -16.00   16.30
 -15  -3  -2  244.28   21.70
 -15  -3  -2  263.67   33.50
 -15   3  -2  214.68   22.90
 -17  -3  -2  938.21   55.69
 -17  -3  -2  877.71   48.00
 -17   3  -2  876.11   48.70
 -19  -3  -2  -10.90   22.20
 -19  -3  -2   41.10   26.10
 -19   3  -2   44.40   23.10
 -21  -3  -2   12.40   29.00
 -21  -3  -2   -2.60   24.30
 -21   3  -2   -9.20   26.30
 -23  -3  -2  191.58   29.60
 -23   3  -2  166.28   31.20
 -25  -3  -2   23.70   30.80
 -25   3  -2   36.70   31.40
 -24  -4   2   32.90   30.10
 -24   4   2   44.80   28.90
 -22  -4   2   56.49   35.90
 -22  -4   2   50.39   24.50
 -22   4   2   41.20   25.50
 -20  -4   2   44.00   24.50
 -20  -4   2   46.30   31.90
 -20   4   2   22.30   23.60
 -18  -4   2  120.29   20.20
 -18  -4   2  111.69   30.80
 -18   4   2  102.79   22.80
 -16  -4   2  418.36   46.20
 -16  -4   2  414.26   28.00
 -16   4   2  413.86   30.70
 -14  -4   2  933.01   57.69
 -14  -4   2  907.11   44.60
 -14   4   2  909.21   46.30
 -12  -4   2  405.56   25.60
 -12  -4   2  432.86   40.50
 -12   4   2  357.76   26.80
 -10  -4   2  518.35   27.40
 -10  -4   2  551.64   41.90
 -10   4   2  539.85   32.80
  -8  -4   2   -1.40   17.80
  -8  -4   2    2.30    8.60
  -8   4   2  -16.50   12.60
  -6  -4   2 2203.38   96.19
  -6  -4   2 2195.18  101.29
  -6   4   2 2220.88   97.29
  -4  -4   2 3812.22  163.28
  -4  -4   2 3620.94  166.98
  -4   4   2 3907.21  164.18
  -2  -4   2   43.80   12.40
  -2   4   2   34.10    9.20
  -4  -4  -2    6.80    8.30
  -4   4  -2  -19.60   10.80
  -6  -4  -2  996.30   50.99
  -6  -4  -2 1152.38   50.49
  -6   4  -2 1220.68   51.59
  -8  -4  -2  986.80   46.60
  -8  -4  -2  999.20   48.00
  -8   4  -2 1029.40   48.00
 -10  -4  -2  960.50   47.60
 -10  -4  -2  921.31   45.00
 -10   4  -2  932.71   46.80
 -12  -4  -2  489.65   33.50
 -12  -4  -2  449.16   30.20
 -12   4  -2  445.06   30.20
 -14  -4  -2   72.09   18.50
 -14  -4  -2   95.29   17.40
 -14   4  -2   47.50   18.50
 -16  -4  -2  136.99   22.80
 -16  -4  -2  145.09   20.20
 -16   4  -2  132.29   22.60
 -18  -4  -2  433.56   43.20
 -18  -4  -2  388.26   32.70
 -18   4  -2  368.26   33.90
 -20  -4  -2  541.75   39.40
 -20  -4  -2  603.94   52.39
 -20   4  -2  548.45   42.00
 -22  -4  -2  307.47   49.00
 -22  -4  -2  286.87   30.90
 -22   4  -2  283.87   32.10
 -24  -4  -2  138.19   34.10
 -24   4  -2   66.19   31.80
 -25  -5   2   45.20   31.80
 -25   5   2   63.49   35.60
 -23  -5   2   76.39   39.40
 -23  -5   2   61.89   25.70
 -23   5   2   84.99   28.30
 -21  -5   2    1.40   25.00
 -21  -5   2   12.20   33.50
 -21   5   2   10.80   24.30
 -19  -5   2   17.20   30.30
 -19  -5   2   25.10   23.00
 -19   5   2   20.90   26.00
 -17  -5   2  622.74   36.70
 -17  -5   2  577.64   52.19
 -17   5   2  532.95   37.60
 -15  -5   2   -7.00   24.40
 -15  -5   2    7.90   15.00
 -15   5   2  -21.70   18.40
 -13  -5   2   69.49   23.80
 -13  -5   2   88.69   14.20
 -13   5   2   65.99   17.70
 -11  -5   2    3.80   12.90
 -11  -5   2  -11.70   21.20
 -11   5   2   -3.40   15.40
  -9  -5   2    1.70   11.10
  -9  -5   2    0.10   19.80
  -9   5   2   -4.70   15.00
  -7  -5   2    8.30   16.50
  -7  -5   2    7.30    8.40
  -7   5   2    1.90   12.40
  -5  -5   2 1923.41   91.29
  -5  -5   2 2012.40   86.79
  -5   5   2 2053.19   88.19
  -3  -5   2  426.36   19.70
  -3  -5   2  420.36   28.70
  -3   5   2  416.56   23.00
  -1  -5   2 4203.78  199.68
   1   5  -2 4935.71  197.38
  -1   5   2 4573.84  197.78
  -3  -5  -2   86.19    9.20
  -3   5  -2   75.09   11.50
  -5  -5  -2  730.43   39.40
  -5  -5  -2  822.72   37.10
  -5   5  -2  861.41   38.60
  -7  -5  -2  218.08   16.40
  -7   5  -2  197.08   16.40
  -9  -5  -2   15.80   12.40
  -9   5  -2    6.10   12.30
 -11  -5  -2    5.20   14.40
 -11  -5  -2    2.50   13.50
 -11   5  -2  -14.70   16.70
 -13  -5  -2   49.99   17.60
 -13  -5  -2   55.09   17.40
 -15  -5  -2  296.77   26.50
 -15  -5  -2  364.46   35.30
 -15   5  -2  292.87   29.10
 -17  -5  -2  556.74   36.80
 -17  -5  -2  614.24   45.40
 -17   5  -2  593.64   39.30
 -19  -5  -2   98.89   42.40
 -19  -5  -2  104.89   23.10
 -19   5  -2  122.19   25.90
 -21  -5  -2   -2.80   24.00
 -21  -5  -2  -15.60   28.40
 -21   5  -2   16.20   25.60
 -23  -5  -2   28.50   27.30
 -23   5  -2   76.69   31.80
 -25  -5  -2   -3.80   31.20
 -25   5  -2   46.30   38.50
 -24  -6   2  -15.70   40.50
 -24  -6   2    6.00   29.70
 -24   6   2   30.80   28.80
 -22  -6   2    0.90   23.90
 -22  -6   2   -2.20   35.60
 -22   6   2    7.40   30.80
 -20  -6   2   26.70   23.90
 -20  -6   2   35.50   33.10
 -20   6   2   20.20   23.60
 -18  -6   2   33.00   18.90
 -18  -6   2   23.60   30.70
 -18   6   2   -4.20   23.00
 -16  -6   2  564.04   35.30
 -16  -6   2  632.34   51.79
 -16   6   2  538.85   36.80
 -14  -6   2  915.81   57.69
 -14  -6   2  871.21   43.70
 -14   6   2  789.12   45.10
 -12  -6   2 1127.39   63.89
 -12  -6   2 1159.78   52.79
 -12   6   2 1067.39   54.49
 -10  -6   2  271.57   34.30
 -10  -6   2  303.07   20.00
 -10   6   2  266.07   23.60
  -8  -6   2  254.17   31.30
  -8  -6   2  219.08   16.40
  -8   6   2  229.68   21.50
  -6  -6   2   24.60   16.50
  -6  -6   2   39.30    7.80
  -6   6   2   37.90   13.20
  -4  -6   2   82.49   16.00
  -4  -6   2   89.19    7.70
  -4   6   2   92.19   12.90
  -2  -6  -2  150.38   12.50
  -2   6  -2  163.18   14.30
  -4  -6  -2  180.18   13.70
  -4   6  -2  171.68   14.80
  -6  -6  -2  591.24   29.30
  -6   6  -2  595.54   31.60
  -8  -6  -2 1379.06   63.59
  -8   6  -2 1409.26   64.49
 -10  -6  -2  915.51   46.00
 -10  -6  -2  848.52   42.30
 -10   6  -2  841.72   44.40
 -12  -6  -2 1047.90   50.59
 -12  -6  -2 1040.10   53.19
 -12   6  -2 1005.90   51.59
 -14  -6  -2  207.18   31.70
 -14   6  -2  245.28   23.20
 -16  -6  -2  220.88   36.40
 -16  -6  -2  234.28   22.90
 -16   6  -2  240.08   25.70
 -18  -6  -2  285.97   43.00
 -18  -6  -2  358.26   30.40
 -18   6  -2  304.07   29.90
 -20  -6  -2  428.86   49.80
 -20  -6  -2  501.25   40.30
 -20   6  -2  436.46   38.90
 -22  -6  -2  206.18   29.00
 -22   6  -2  239.98   31.60
 -24  -6  -2   48.80   33.40
 -24   6  -2   69.19   33.80
 -25  -7   2   21.20   31.80
 -25   7   2   45.40   32.20
 -23  -7   2    6.30   40.00
 -23  -7   2   26.70   25.30
 -23   7   2   37.60   29.10
 -21  -7   2   16.30   22.10
 -21  -7   2  -11.50   36.90
 -21   7   2   -6.80   29.30
 -19  -7   2   27.10   33.00
 -19  -7   2   18.30   21.90
 -19   7   2   28.10   24.80
 -17  -7   2   66.79   30.20
 -17  -7   2   33.60   18.10
 -17   7   2   30.00   24.90
 -15  -7   2    1.10   25.40
 -15  -7   2    2.30   14.90
 -15   7   2   -6.20   19.50
 -13  -7   2    2.00   23.80
 -13  -7   2    5.30   13.90
 -13   7   2    0.60   31.80
 -11  -7   2   -4.10   20.90
 -11  -7   2    5.60   12.60
 -11   7   2  -12.80   17.40
  -9  -7   2  480.15   39.80
  -9  -7   2  499.55   25.90
  -9   7   2  468.35   29.80
  -7  -7   2  632.14   29.90
  -7  -7   2  610.14   41.90
  -7   7   2  650.63   33.80
  -5  -7   2   30.30   17.60
  -5  -7   2   29.70    7.10
  -5   7   2   29.00   13.10
  -3  -7   2 1765.62   90.99
  -3   7   2 2195.78   87.59
   1   7  -2 1441.26   62.39
  -1   7   2 1379.96   63.19
  -3  -7  -2  274.77   16.00
  -3   7  -2  207.98   18.10
  -5  -7  -2   30.60    9.90
  -5   7  -2    7.90   13.20
 -11  -7  -2  160.48   28.00
 -11  -7  -2  139.69   16.30
 -11   7  -2  142.59   19.30
 -13  -7  -2   36.20   15.30
 -13  -7  -2   -4.80   17.70
 -13   7  -2   38.60   19.60
 -15  -7  -2  700.23   37.30
 -15  -7  -2  601.54   44.80
 -15   7  -2  702.93   40.90
 -17  -7  -2  170.58   26.70
 -17  -7  -2  266.37   25.80
 -17   7  -2  235.38   27.20
 -19  -7  -2   28.30   21.30
 -19   7  -2   19.80   26.30
 -21  -7  -2   28.50   24.90
 -21   7  -2   37.30   27.40
 -23  -7  -2   41.90   28.20
 -23   7  -2   60.99   31.50
 -24  -8   2  -10.90   41.70
 -24  -8   2   71.69   31.40
 -24   8   2   67.59   32.60
 -22  -8   2   35.20   24.60
 -22  -8   2  -10.30   39.60
 -22   8   2   24.10   28.30
 -20  -8   2   29.90   24.10
 -20  -8   2   24.00   36.70
 -20   8   2   14.70   26.40
 -18  -8   2   84.29   33.70
 -18  -8   2   86.09   19.80
 -18   8   2   94.89   25.20
 -16  -8   2 1004.80   65.89
 -16  -8   2  989.60   50.49
 -16   8   2  976.80   52.89
 -14  -8   2 1548.65   80.49
 -14  -8   2 1445.76   67.89
 -14   8   2 1395.56   69.69
 -12  -8   2  938.51   45.90
 -12  -8   2  973.00   57.59
 -12   8   2  941.81   48.70
 -10  -8   2  756.02   49.70
 -10  -8   2  752.22   37.30
 -10   8   2  788.92   38.70
  -8  -8   2  162.48   14.60
  -8   8   2  146.89   18.90
  -6  -8   2  133.69   12.40
  -6  -8   2  193.18   27.20
  -6   8   2  145.79   17.20
  -4  -8   2  212.48   28.20
  -4  -8   2  202.78   13.10
  -4   8   2  200.78   18.60
  -2  -8   2  993.80   56.89
  -2   8   2 1178.78   51.69
   2   8  -2 1188.58   50.19
   0  -8   2 1382.76   65.99
   0   8   2 1288.67   59.99
   0   8  -2 1314.27   59.09
  -2  -8  -2   54.49    9.80
  -2   8  -2   37.30   11.40
  -4  -8  -2   86.39   10.80
  -4   8  -2   93.49   13.60
  -6  -8  -2  833.22   39.50
  -6   8  -2  844.12   40.30
 -10  -8  -2  790.42   43.50
 -10  -8  -2  587.74   36.10
 -10   8  -2  603.84   37.10
 -12  -8  -2 1087.59   60.39
 -12  -8  -2 1293.07   55.89
 -12   8  -2 1034.10   67.79
 -14  -8  -2  437.06   39.90
 -14  -8  -2  321.97   38.20
 -14   8  -2  454.85   31.80
 -16  -8  -2  693.83   41.90
 -16   8  -2  676.73   43.40
 -18  -8  -2  316.77   32.90
 -18   8  -2  501.85   37.00
 -20  -8  -2  757.52   45.30
 -20   8  -2  711.73   49.00
 -22  -8  -2  188.28   32.00
 -22   8  -2  164.48   32.00
 -24  -8  -2   12.40   34.40
 -24   8  -2   41.40   33.20
 -23  -9   2   25.20   30.00
 -23   9   2   45.70   32.40
 -21  -9   2  -26.10   37.40
 -21  -9   2  -11.40   25.90
 -21   9   2    6.80   27.80
 -19  -9   2    2.40   35.20
 -19  -9   2   41.00   20.50
 -19   9   2   27.70   25.90
 -17  -9   2   15.80   21.30
 -17  -9   2   20.30   32.20
 -17   9   2    1.60   23.30
 -15  -9   2  313.07   48.40
 -15  -9   2  332.37   27.30
 -15   9   2  319.27   30.40
 -13  -9   2  242.68   44.10
 -13  -9   2  280.87   23.10
 -13   9   2  261.47   24.70
 -11  -9   2  134.39   25.50
 -11  -9   2  157.38   15.10
 -11   9   2  149.69   20.30
  -9  -9   2   40.30   23.10
  -9  -9   2    5.80   11.20
  -9   9   2    3.40   16.70
  -7  -9   2    8.00    9.00
  -7   9   2    8.50   16.10
  -5  -9   2  349.47   18.90
  -5   9   2  361.86   24.20
  -3  -9   2  403.16   33.60
  -3   9   2  328.67   23.50
   3   9  -2  322.17   20.20
   1   9  -2  121.09   11.60
  -1   9   2  130.29   14.80
  -1   9  -2   32.10   10.80
   1   9   2   25.40   12.80
  -3  -9  -2   77.99   11.10
  -3   9  -2   63.69   13.20
  -5   9  -2  101.79   15.60
  -9  -9  -2  831.92   41.20
  -9   9  -2  802.62   42.70
 -11  -9  -2   42.80   14.50
 -11  -9  -2  100.49   23.70
 -11   9  -2   30.60   19.00
 -13  -9  -2  -27.50   22.20
 -13  -9  -2    7.10   17.80
 -13   9  -2    5.10   19.80
 -15  -9  -2  419.56   30.10
 -15   9  -2  396.16   34.00
 -17  -9  -2  211.78   24.60
 -17   9  -2  178.78   28.10
 -19  -9  -2   93.99   26.30
 -19   9  -2   34.70   28.00
 -21  -9  -2   25.30   26.10
 -21   9  -2   61.89   31.30
 -23  -9  -2   71.09   30.20
 -23   9  -2   95.59   33.80
 -24 -10   2    8.70   33.50
 -24  10   2   31.50   38.40
 -22 -10   2  -13.30   42.80
 -22 -10   2   82.49   29.20
 -22  10   2  165.68   32.90
 -20 -10   2  258.47   25.90
 -20 -10   2  158.68   42.30
 -20  10   2  228.28   30.50
 -18 -10   2  137.69   37.30
 -18 -10   2  152.78   24.00
 -18  10   2  181.68   28.60
 -16 -10   2  288.87   28.20
 -16 -10   2  249.08   36.30
 -16  10   2  299.97   29.00
 -14 -10   2  466.95   51.99
 -14 -10   2  501.15   30.70
 -14  10   2  464.35   34.40
 -12 -10   2 1081.69   64.39
 -12 -10   2 1108.39   51.29
 -12  10   2 1063.59   54.69
 -10 -10   2  347.57   44.10
 -10 -10   2  284.17   20.40
 -10  10   2  288.27   22.40
  -8 -10   2 1296.97   62.59
  -8 -10   2 1528.15   75.89
  -8  10   2 1392.86   65.79
  -4  10   2 1111.29   52.39
   4  10  -2 1091.79   50.29
  -2 -10   2 1992.40   97.49
  -2  10   2 2090.79   92.09
   2  10  -2 2123.99   91.19
   0  10  -2  719.43   34.20
   0  10   2  690.53   35.70
  -2  10  -2  817.12   39.20
   2  10   2  801.12   39.50
  -4 -10  -2 1611.14   71.79
  -4  10  -2 1611.44   72.99
  -6 -10  -2  680.83   33.80
  -6  10  -2  687.43   36.80
 -10 -10  -2  530.95   29.40
 -10  10  -2  506.65   33.30
 -12 -10  -2  711.43   52.59
 -12 -10  -2  858.21   41.10
 -12  10  -2  849.22   44.30
 -14 -10  -2  379.86   47.30
 -14 -10  -2  488.55   30.80
 -14  10  -2  526.85   35.00
 -16 -10  -2  707.13   41.40
 -16  10  -2  716.63   44.70
 -18 -10  -2  472.25   38.60
 -18  10  -2  429.86   39.80
 -20 -10  -2  363.56   36.30
 -20  10  -2  373.76   36.40
 -22 -10  -2  165.48   30.30
 -22  10  -2  154.28   34.30
 -24 -10  -2   94.39   37.30
 -24  10  -2   71.79   36.90
 -23 -11   2   79.99   32.00
 -23  11   2   92.79   34.50
 -21 -11   2   56.99   28.00
 -21  11   2   58.99   30.60
 -19 -11   2   58.49   22.50
 -19 -11   2  -17.90   39.00
 -19  11   2   77.89   27.80
 -17 -11   2  174.28   37.50
 -17 -11   2  246.28   23.90
 -17  11   2  194.28   28.50
 -15 -11   2  100.49   19.30
 -15 -11   2   43.00   30.70
 -15  11   2   85.29   23.50
 -13 -11   2   98.19   16.60
 -13 -11   2   69.39   28.80
 -13  11   2   93.99   22.40
 -11 -11   2  169.28   15.50
 -11 -11   2  123.19   28.80
 -11  11   2  139.59   22.50
  -9 -11   2  633.94   50.29
  -9 -11   2  529.55   28.60
  -9  11   2  522.15   33.90
   3  11  -2 1488.85   67.29
  -3  11   2 1504.65   68.79
  -1  11   2 1447.96   67.39
   1  11  -2 1493.15   66.09
  -1  11  -2  615.64   32.30
   1  11   2  658.83   33.90
  -3  11  -2   92.59   15.10
  -5 -11  -2  263.07   20.00
  -5  11  -2  194.28   20.10
  -7 -11  -2  245.48   18.50
  -7  11  -2  202.68   21.40
  -9 -11  -2  223.68   22.10
  -9  11  -2  226.18   22.20
 -11 -11  -2   81.29   15.70
 -11  11  -2   67.39   16.30
 -13 -11  -2   97.09   18.30
 -13 -11  -2   85.29   32.00
 -13  11  -2   75.79   17.80
 -15 -11  -2   47.00   34.50
 -15 -11  -2   90.09   19.70
 -15  11  -2  105.89   25.50
 -17 -11  -2  187.18   26.70
 -17  11  -2  153.08   27.30
 -19 -11  -2   27.00   28.00
 -19  11  -2   47.10   28.50
 -21 -11  -2   -6.60   30.70
 -21  11  -2   33.00   30.50
 -23 -11  -2   28.80   35.10
 -23  11  -2   56.69   39.20
 -24 -12   2  106.69   35.70
 -24  12   2   59.79   35.70
 -22 -12   2  201.68   32.90
 -22  12   2  167.78   35.60
 -20 -12   2   52.19   27.40
 -20  12   2  154.48   31.20
 -18 -12   2   25.30   23.40
 -18 -12   2  -51.89   37.90
 -18  12   2   21.90   26.70
 -16 -12   2  -32.80   34.50
 -16 -12   2   32.70   20.60
 -16  12   2   23.10   24.90
 -14 -12   2  113.89   34.90
 -14 -12   2  215.48   20.30
 -14  12   2  190.48   25.30
 -12 -12   2  298.57   48.20
 -12 -12   2  393.76   24.70
 -12  12   2  353.76   30.90
 -10 -12   2  735.53   55.79
 -10 -12   2  728.23   36.20
   0  12   2  100.39   16.80
   0  12  -2   84.19   14.40
   2  12   2   79.79   16.40
  -2  12  -2   91.49   15.30
  -4  12  -2  151.78   18.40
  -6 -12  -2  554.24   30.30
  -6  12  -2  534.35   32.40
  -8 -12  -2 1246.78   58.59
  -8  12  -2 1308.87   61.19
 -10 -12  -2  325.57   25.90
 -10  12  -2  357.76   29.10
 -12 -12  -2  105.69   34.70
 -12 -12  -2   34.80   18.10
 -12  12  -2   22.20   21.90
 -14 -12  -2  138.69   22.10
 -14 -12  -2  157.58   37.20
 -14  12  -2  127.89   24.80
 -16 -12  -2   42.80   21.10
 -16  12  -2   -8.00   25.30
 -18 -12  -2  193.18   28.80
 -18  12  -2  167.68   30.80
 -20 -12  -2  552.84   41.70
 -20  12  -2  545.55   46.80
 -22 -12  -2  508.05   49.20
 -22  12  -2  485.25   49.50
 -23 -13   2   49.00   32.40
 -23  13   2   94.89   35.70
 -21 -13   2   42.20   28.80
 -21  13   2   39.90   32.20
 -19 -13   2  108.09   26.20
 -19  13   2   75.09   29.20
 -17 -13   2  270.47   26.60
 -17  13   2  270.67   31.30
 -15 -13   2   27.40   37.50
 -15 -13   2  103.39   19.80
 -15  13   2  116.09   25.80
 -13 -13   2   10.50   15.70
 -13 -13   2   -3.90   34.20
 -13  13   2  -14.30   22.90
 -11 -13   2  129.69   15.30
 -11 -13   2  120.79   34.20
 -11  13   2  113.99   22.90
  -9 -13   2  161.48   33.90
  -9 -13   2   69.49   13.00
  -1  13   2   57.09   17.00
   1  13  -2   46.10   14.10
  -1  13  -2  642.44   36.30
   1  13   2  674.43   36.00
  -3  13  -2  386.16   26.10
   3  13   2  374.16   26.20
  -5 -13  -2   36.30   12.70
  -5  13  -2   38.00   17.20
  -7 -13  -2   19.50   13.00
  -7  13  -2   11.60   17.50
  -9 -13  -2   74.79   14.80
 -11 -13  -2  244.28   21.80
 -11  13  -2  219.58   25.30
 -13 -13  -2   52.29   18.80
 -13 -13  -2  166.28   41.80
 -13  13  -2   51.79   24.50
 -15 -13  -2   59.09   41.60
 -15 -13  -2   44.90   23.00
 -15  13  -2   42.00   25.00
 -17 -13  -2  -24.70   25.20
 -17  13  -2   -1.60   28.10
 -19 -13  -2   10.40   28.30
 -19  13  -2   28.70   29.80
 -21 -13  -2  158.38   31.60
 -21  13  -2  159.28   39.80
 -23 -13  -2   42.30   32.60
 -23  13  -2   73.29   41.60
 -22 -14   2   40.70   31.80
 -22  14   2   75.89   35.90
 -20 -14   2   38.60   28.00
 -20  14   2   14.40   30.60
 -18 -14   2   47.50   24.40
 -18  14   2   60.59   29.60
 -16 -14   2   -3.30   21.60
 -16  14   2  -30.60   26.30
 -14 -14   2   18.70   17.60
 -14 -14   2    8.80   41.30
 -14  14   2    7.60   24.60
 -12 -14   2   58.39   37.80
 -12 -14   2   30.20   15.40
 -12  14   2   30.30   23.10
 -10 -14   2   49.20   13.70
 -10 -14   2  106.39   37.00
 -10  14   2   44.40   17.10
   0  14  -2 1680.43   77.59
   0  14   2 1754.02   78.89
  -2  14  -2 1051.49   52.69
   2  14   2 1085.29   53.49
   4  14   2  249.38   23.40
  -4  14  -2  278.17   23.60
  -6 -14  -2  242.88   20.00
  -6  14  -2  256.17   22.40
  -8 -14  -2  194.68   19.70
  -8  14  -2  233.48   26.90
 -10 -14  -2  101.29   18.30
 -10  14  -2   88.09   22.00
 -12  14  -2  -10.90   22.60
 -14 -14  -2   53.29   22.20
 -14  14  -2   27.00   25.30
 -16 -14  -2   26.10   21.90
 -16  14  -2   -3.50   26.90
 -18 -14  -2  151.78   29.40
 -18  14  -2  159.28   31.50
 -20 -14  -2  188.48   33.20
 -20  14  -2  184.88   36.10
 -22 -14  -2  102.49   36.10
 -22  14  -2  167.48   38.60
 -21 -15   2  -13.20   29.40
 -21  15   2  -13.60   38.20
 -19 -15   2  110.49   27.40
 -19  15   2   91.69   33.00
 -17 -15   2  287.67   27.50
 -17  15   2  260.37   34.20
 -15 -15   2  126.59   23.50
 -15 -15   2   56.49   44.50
 -15  15   2  146.09   28.80
 -13 -15   2    8.00   16.70
 -13 -15   2   65.59   42.00
 -13  15   2   10.80   24.00
 -11 -15   2  168.58   17.20
 -11  15   2  145.29   20.70
  -9 -15   2  212.48   19.90
  -9  15   2  248.98   25.50
  -7 -15   2  693.73   57.79
   3  15  -2  655.73   35.60
  -3  15   2  621.84   37.50
   1  15  -2  446.86   30.40
  -1  15   2  462.45   31.30
  -1  15  -2  553.64   33.60
   1  15   2  534.55   33.10
  -3  15  -2  462.35   30.40
   3  15   2  511.65   31.00
  -5  15  -2   50.49   18.50
  -7 -15  -2  276.47   24.40
  -7  15  -2  303.67   25.60
  -9 -15  -2  546.55   31.40
  -9  15  -2  566.54   36.30
 -11 -15  -2   69.79   19.80
 -11  15  -2   67.29   23.50
 -13 -15  -2   70.89   21.20
 -13  15  -2   63.39   25.20
 -15 -15  -2   24.00   21.00
 -15  15  -2  -12.00   26.50
 -17 -15  -2   41.20   24.30
 -17  15  -2   34.20   29.80
 -19 -15  -2    4.40   29.80
 -19  15  -2   26.20   31.10
 -21 -15  -2   92.79   34.00
 -21  15  -2   92.89   36.10
 -22 -16   2   -9.00   31.80
 -22  16   2   -4.30   41.20
 -20 -16   2   33.80   29.70
 -20  16   2   53.69   34.50
 -18 -16   2   -2.40   25.00
 -18  16   2  -17.80   31.60
 -16 -16   2   39.80   21.30
 -16 -16   2  -55.69   56.99
 -16  16   2   41.00   29.10
 -14 -16   2  115.59   50.29
 -14 -16   2  108.49   19.40
 -14  16   2  100.19   28.40
 -12 -16   2  209.28   49.50
 -12 -16   2  139.59   18.20
 -12  16   2  120.39   25.60
 -10 -16   2  213.18   21.90
 -10 -16   2  376.66   62.49
 -10  16   2  242.68   27.20
  -8 -16   2  222.68   48.60
  -8  16   2   16.10   22.10
   2  16  -2  566.74   32.10
  -2  16   2  559.14   32.20
   0  16  -2  274.77   23.90
   0  16   2  262.77   26.50
  -2  16  -2  164.88   19.40
   2  16   2  157.68   20.10
   4  16   2   29.10   19.80
  -4  16  -2   48.40   18.00
  -6  16  -2   19.00   18.80
  -8 -16  -2  -23.00   14.80
  -8  16  -2    0.10   20.00
 -10 -16  -2    9.30   18.60
 -10  16  -2  -38.20   22.40
 -12 -16  -2  130.59   20.10
 -12  16  -2  143.49   26.40
 -14 -16  -2   41.90   20.50
 -14  16  -2   38.50   27.60
 -16 -16  -2  -10.50   25.90
 -16  16  -2   11.70   27.70
 -18 -16  -2   49.20   29.00
 -18  16  -2    5.60   31.20
 -20 -16  -2  169.28   36.00
 -20  16  -2  192.08   36.60
 -22 -16  -2  107.89   37.70
 -22  16  -2  107.89   38.00
 -21 -17   2    2.70   30.10
 -21  17   2   29.20   38.20
 -19 -17   2   42.10   27.80
 -19  17   2   46.20   34.50
 -17 -17   2   65.99   24.60
 -17  17   2   81.29   32.30
 -15 -17   2  220.28   24.00
 -15 -17   2   67.29   91.89
 -15  17   2  210.88   31.20
 -13 -17   2   75.19   57.19
 -13 -17   2   23.10   17.70
 -13  17   2   15.00   26.70
 -11 -17   2  889.61   47.40
 -11 -17   2 1071.09   81.39
 -11  17   2  973.50   53.39
  -9 -17   2  862.21   73.79
  -9  17   2  723.13   46.20
  -7  17   2  296.17   27.40
   7  17  -2  262.47   25.40
  -3  17   2  453.95   32.80
   3  17  -2  434.76   30.90
  -1  17   2  377.76   30.60
   1  17  -2  401.96   27.50
  -1  17  -2   56.89   17.20
   1  17   2   10.80   18.80
   3  17   2   97.69   19.70
  -3  17  -2  129.79   19.50
   5  17   2  187.88   20.80
  -5  17  -2  121.59   21.40
  -7  17  -2   71.49   21.40
  -9 -17  -2   71.99   27.70
  -9  17  -2   98.99   23.70
 -11 -17  -2   14.20   19.80
 -11  17  -2   25.90   23.90
 -13 -17  -2   16.50   19.90
 -13  17  -2   26.70   26.00
 -15 -17  -2  -17.70   21.50
 -15  17  -2    8.30   28.50
 -17 -17  -2   18.30   24.80
 -17  17  -2   35.90   30.50
 -19 -17  -2   27.20   32.40
 -19  17  -2   -3.20   34.50
 -21 -17  -2   -6.20   36.00
 -21  17  -2   54.89   38.00
 -20 -18   2    0.10   30.20
 -20  18   2   -4.60   34.50
 -18 -18   2   27.80   26.30
 -18  18   2   46.00   33.70
 -16 -18   2    5.10   22.70
 -16  18   2   10.80   31.10
 -14 -18   2   21.00   24.10
 -14 -18   2   10.10   64.69
 -14  18   2   34.10   29.40
 -12 -18   2   30.10   18.40
 -12  18   2   44.00   26.60
 -10 -18   2  358.66   88.79
   4  18  -2  133.29   18.80
  -4  18   2  164.18   24.20
   2  18  -2  105.09   18.50
   0  18   2   -6.20   20.20
   0  18  -2   11.40   18.10
  -2  18  -2    2.50   18.50
   4  18   2   49.80   19.90
  -4  18  -2   59.29   20.80
  -6  18  -2  141.49   22.20
   6  18   2  130.39   21.00
  -8  18  -2   50.49   23.20
 -10 -18  -2   -5.40   19.70
 -10  18  -2   -2.00   23.90
 -12 -18  -2    5.50   21.60
 -12  18  -2   28.30   27.00
 -14 -18  -2    2.90   21.30
 -14  18  -2  -13.20   27.80
 -16 -18  -2   19.90   27.40
 -16  18  -2    4.40   29.60
 -18 -18  -2  -33.10   30.60
 -18  18  -2   10.70   32.10
 -20 -18  -2   65.49   34.40
 -20  18  -2   99.09   37.40
 -21 -19   2  -17.00   33.50
 -21  19   2   23.30   38.30
 -19 -19   2   53.49   30.60
 -19  19   2   87.39   37.10
 -17 -19   2  103.59   25.90
 -17  19   2  113.49   34.70
 -15 -19   2  -87.89   72.79
 -15 -19   2  138.69   22.90
 -15  19   2  148.59   32.70
 -13 -19   2  108.69   65.59
 -13  19   2    0.90   28.40
 -11 -19   2  522.25   80.59
   5  19  -2  430.66   30.10
  -5  19   2  481.95   36.30
   3  19  -2  302.97   26.10
  -3  19   2  276.17   28.00
   1  19  -2  270.17   24.10
  -1  19   2  298.27   27.80
  -1  19  -2   76.89   22.90
   3  19   2   26.30   24.10
  -5  19  -2   61.79   21.30
  -7  19  -2   37.60   22.50
   7  19   2   38.00   23.60
  -9  19  -2   89.39   25.70
 -11 -19  -2   97.39   23.10
 -11  19  -2   87.89   27.30
 -13 -19  -2   -7.90   20.70
 -13  19  -2    2.90   28.60
 -15 -19  -2    4.00   23.60
 -15  19  -2  -19.10   31.10
 -17 -19  -2   57.79   26.60
 -17  19  -2   57.29   34.10
 -19 -19  -2   37.00   33.10
 -19  19  -2   23.10   35.40
 -20 -20   2  -26.30   30.90
 -20  20   2   29.40   38.00
 -18 -20   2    9.80   27.00
 -18  20   2   42.20   36.50
 -16 -20   2   14.00   24.80
 -16  20   2    2.50   33.10
 -14 -20   2   14.60   21.80
 -14 -20   2 -156.98   76.39
 -14  20   2   23.00   31.30
 -12 -20   2  163.28   70.29
 -12  20   2   42.30   28.30
   6  20  -2   48.50   21.70
  -6  20   2   44.70   25.60
  -4  20   2   -4.10   23.70
   4  20  -2   -6.70   21.50
   2  20  -2   37.60   19.80
  -2  20   2   -2.70   23.20
   0  20  -2   -6.30   20.20
   0  20   2   -0.20   22.60
  -2  20  -2   -4.50   25.70
   2  20   2   -2.70   21.40
  -4  20  -2  352.36   31.90
   4  20   2  371.26   31.40
  -6  20  -2  184.08   26.50
   6  20   2  192.98   24.90
  -8  20  -2  109.19   26.10
   8  20   2  151.98   23.80
 -10  20  -2   11.40   26.10
 -12 -20  -2   10.80   21.10
 -12  20  -2    7.60   28.30
 -14 -20  -2   11.70   22.70
 -14  20  -2   33.80   30.40
 -16 -20  -2   20.00   29.50
 -16  20  -2   18.50   34.40
 -18 -20  -2   12.20   32.60
 -18  20  -2   46.90   35.20
 -20 -20  -2  103.19   37.00
 -20  20  -2  124.49   38.50
 -19 -21   2    3.60   29.80
 -19  21   2   35.70   39.50
 -17 -21   2  374.36   38.00
 -17  21   2  366.36   40.70
 -15  21   2   -3.50   33.20
 -13 -21   2  -72.29   79.79
 -13  21   2   25.20   30.30
 -11  21   2   25.10   29.50
  -9  21   2  347.47   34.30
   9  21  -2  279.17   27.90
   7  21  -2   88.69   22.10
  -7  21   2   68.29   27.80
   5  21  -2  159.18   22.30
  -5  21   2  169.58   28.10
   3  21  -2  278.27   28.10
  -3  21   2  253.67   29.30
   1  21  -2  113.09   26.30
  -1  21   2  119.79   26.50
   1  21   2   26.90   22.80
  -1  21  -2   18.30   21.20
  -3  21  -2   76.49   26.50
   3  21   2   58.59   23.70
   5  21   2  256.57   29.20
  -5  21  -2  260.47   30.90
  -7  21  -2    9.20   25.30
   7  21   2   11.90   23.10
   9  21   2    4.60   26.00
  -9  21  -2   -7.90   25.60
 -11  21  -2   78.29   28.10
 -13 -21  -2   25.20   25.70
 -13  21  -2   11.50   30.80
 -15 -21  -2   20.70   25.50
 -15  21  -2    0.30   33.90
 -17 -21  -2  -10.30   32.00
 -17  21  -2   31.30   34.80
 -19 -21  -2   -0.30   35.20
 -19  21  -2   41.70   37.30
 -18 -22   2    5.20   31.60
 -18  22   2   39.80   39.70
 -16  22   2   17.10   35.90
 -14  22   2   34.40   32.40
 -12  22   2   22.40   31.50
  12  22  -2   11.60   26.20
 -10  22   2    3.70   31.00
  10  22  -2   10.60   24.50
  -8  22   2   87.29   29.90
  -6  22   2   86.99   27.80
  -4  22   2   15.00   26.30
  -2  22   2  375.96   32.80
   2  22  -2  334.17   31.70
   0  22  -2  191.78   25.20
   0  22   2  184.38   28.40
  -2  22  -2  102.09   24.40
   2  22   2   78.09   25.30
  -4  22  -2   46.90   25.40
   4  22   2   26.00   26.50
  -6  22  -2   48.50   26.60
   6  22   2   97.19   27.60
  -8  22  -2    7.50   26.90
   8  22   2   -5.60   24.00
  10  22   2   70.79   28.30
 -10  22  -2   67.59   29.10
 -12  22  -2   33.90   30.90
 -14 -22  -2    6.90   29.00
 -14  22  -2   -5.80   32.30
 -16 -22  -2   53.19   27.80
 -16  22  -2   24.00   37.00
 -18 -22  -2   33.10   34.60
 -18  22  -2   66.69   37.40
 -17  23   2  234.58   41.80
 -15  23   2  -22.00   36.40
 -13  23   2  181.68   36.60
  13  23  -2  178.68   29.40
  11  23  -2   35.90   26.20
 -11  23   2   63.39   34.20
  -9  23   2  145.49   32.10
   9  23  -2   92.19   25.50
   7  23  -2   60.79   25.40
  -7  23   2   54.49   30.50
  -5  23   2  546.65   42.70
   5  23  -2  499.15   36.60
   3  23  -2  690.73   41.80
  -3  23   2  630.94   45.60
   1  23  -2   -5.70   23.30
  -1  23   2   19.90   27.00
  -1  23  -2   39.20   24.00
   1  23   2   64.29   30.80
   3  23   2   41.20   29.40
  -3  23  -2   35.20   25.90
  -5  23  -2   93.69   27.00
   5  23   2  161.58   29.80
  -7  23  -2   68.59   29.10
   7  23   2   24.60   25.80
   9  23   2   44.70   29.30
  -9  23  -2   74.59   29.50
  11  23   2   13.10   26.10
 -11  23  -2   41.60   32.00
 -13  23  -2   43.70   32.40
 -15  23  -2   -7.50   36.00
 -17 -23  -2    5.60   30.80
 -17  23  -2   59.49   43.60
  16  24  -2    6.40   32.40
 -16  24   2   78.19   39.90
 -14  24   2   43.60   37.80
  14  24  -2   17.10   30.40
  12  24  -2    3.50   28.60
 -12  24   2   40.50   36.00
 -10  24   2   38.70   34.90
  10  24  -2   79.29   27.10
  -8  24   2   -3.50   30.70
   8  24  -2  -28.40   23.20
  -6  24   2   79.29   31.20
   6  24  -2   99.09   26.90
  -4  24   2   57.99   29.30
   4  24  -2   38.10   26.90
   2  24  -2  -12.30   27.50
  -2  24   2   23.10   28.80
   0  24   2  -21.50   28.30
   0  24  -2   -5.00   28.00
  -2  24  -2   31.50   25.70
   2  24   2   51.99   28.40
   4  24   2  -18.00   30.10
  -4  24  -2   28.10   26.90
   6  24   2  -14.80   25.50
  -6  24  -2   -2.80   29.10
  -8  24  -2   -1.20   30.70
   8  24   2   10.60   30.40
 -10  24  -2    4.60   31.30
  10  24   2   25.20   30.20
 -12  24  -2  120.99   33.70
  12  24   2  109.79   28.90
 -14  24  -2   20.10   35.70
 -16  24  -2   15.00   37.00
 -15  25   2   21.50   40.90
  15  25  -2   14.40   31.00
  13  25  -2   34.30   29.70
 -13  25   2   48.10   38.50
 -11  25   2  258.87   40.10
  11  25  -2  266.67   32.90
   9  25  -2   48.30   28.90
  -9  25   2   89.79   35.50
   7  25  -2   16.70   24.50
  -7  25   2  -46.10   32.60
  -5  25   2  -13.40   30.80
   5  25  -2    5.50   28.90
   3  25  -2   17.30   25.70
  -3  25   2   25.80   30.90
   1  25  -2   61.69   26.60
  -1  25   2  116.49   31.70
  -1  25  -2    5.70   30.30
   1  25   2   19.90   32.90
   3  25   2   83.59   29.40
  -3  25  -2   51.79   28.40
  -5  25  -2  175.28   31.30
   5  25   2   39.60   32.00
  -7  25  -2   -8.00   31.10
   7  25   2  -11.60   30.50
   9  25   2   81.39   32.50
  -9  25  -2  119.09   33.80
  11  25   2   -1.40   28.50
 -11  25  -2   22.20   33.90
  13  25   2  112.29   34.10
 -13  25  -2   87.79   36.90
 -15  25  -2   -1.60   38.10
 -14  26   2  137.09   42.90
  14  26  -2  128.79   32.40
  12  26  -2   73.29   31.00
 -12  26   2   93.69   39.30
 -10  26   2  147.39   38.70
  10  26  -2  113.69   31.00
   8  26  -2   98.59   30.70
  -8  26   2  143.49   37.00
   6  26  -2  152.78   31.60
  -6  26   2  106.99   35.00
   4  26  -2  128.79   28.40
  -4  26   2  145.89   34.50
   2  26  -2  516.45   45.30
  -2  26   2  440.56   41.00
   0  26  -2  276.97   33.20
   0  26   2  433.66   41.80
  -2  26  -2   16.20   29.50
   2  26   2   16.20   34.00
   4  26   2   51.29   30.20
  -4  26  -2   37.60   29.60
  -6  26  -2   -4.30   30.60
   6  26   2   -7.60   29.20
  -8  26  -2   53.59   33.50
   8  26   2   99.19   30.00
  10  26   2  183.48   35.50
 -10  26  -2  214.28   37.10
 -12  26  -2  185.98   38.10
  12  26   2  159.28   32.10
 -14  26  -2  135.99   40.60
  14  26   2   99.29   35.80
 -13  27   2  108.69   41.80
  13  27  -2   77.39   34.30
  11  27  -2  127.49   32.50
 -11  27   2  157.08   40.20
  -9  27   2   51.99   36.40
   9  27  -2   13.90   30.30
   7  27  -2   32.80   30.80
  -7  27   2   36.00   35.50
  -5  27   2   -8.70   34.70
   5  27  -2    2.10   27.60
   3  27  -2   33.20   31.70
  -3  27   2    9.90   33.50
   1  27  -2  -25.90   32.90
  -1  27   2   24.80   33.40
   1  27   2  126.39   32.80
  -1  27  -2  134.19   34.50
   3  27   2    3.90   35.80
  -3  27  -2   17.10   30.80
   5  27   2  -17.70   33.90
  -5  27  -2   36.50   36.40
  -7  27  -2   33.60   38.30
   7  27   2  -16.90   34.00
  -9  27  -2  129.89   36.60
   9  27   2  159.68   32.30
  11  27   2   -0.30   35.20
 -11  27  -2    3.90   36.30
  13  27   2   14.90   37.10
 -13  27  -2   49.10   39.50
 -12  28   2  189.88   43.80
  12  28  -2  217.08   36.30
 -10  28   2  176.28   41.10
  10  28  -2  140.49   33.90
  -8  28   2   92.59   39.10
   8  28  -2   66.59   34.20
  -6  28   2   57.89   37.70
   6  28  -2   78.39   34.30
  -4  28   2  193.78   39.40
   4  28  -2  225.28   36.10
   2  28  -2  115.19   34.00
  -2  28   2  140.99   35.80
   0  28   2  341.97   39.00
   0  28  -2  326.27   36.30
   2  28   2   -4.60   37.70
  -2  28  -2   11.80   32.20
   4  28   2  -14.70   35.80
  -4  28  -2    4.00   33.40
  -6  28  -2  120.99   35.60
   6  28   2  123.79   33.20
  -8  28  -2  282.77   44.40
   8  28   2  310.07   36.30
 -10  28  -2  208.78   40.90
  10  28   2  129.69   33.30
  12  28   2  117.99   38.10
 -12  28  -2  152.88   41.50
 -11  29   2  107.79   43.40
  11  29  -2   53.89   35.20
  -9  29   2   57.99   42.30
   9  29  -2   43.00   33.80
   7  29  -2   42.40   34.10
  -7  29   2   42.70   39.80
  -5  29   2    8.50   37.40
   5  29  -2  -10.50   35.20
   3  29  -2   20.30   34.30
  -3  29   2  -14.20   42.00
   1  29  -2    6.50   32.10
  -1  29   2   43.20   39.80
  -1  29  -2   -9.60   33.10
   1  29   2   38.20   34.80
   3  29   2  -12.00   34.20
  -3  29  -2   -7.40   37.50
  -5  29  -2   15.10   34.70
   5  29   2   16.90   34.40
  -7  29  -2   64.09   37.80
   7  29   2   59.29   38.90
   9  29   2   -5.40   32.60
  -9  29  -2   12.60   37.40
 -11  29  -2   -6.20   40.60
  11  29   2    1.50   33.50
  10  30  -2    6.40   35.60
 -10  30   2   62.99   44.20
  -8  30   2   34.20   49.10
   8  30  -2   26.50   36.10
  -6  30   2  -25.20   41.60
   6  30  -2   15.50   35.60
   4  30  -2  114.79   37.80
  -4  30   2   95.89   41.00
  -2  30   2  196.58   39.90
   2  30  -2  182.48   35.50
   0  30   2  -11.10   42.40
   0  30  -2   -6.20   32.80
   2  30   2   42.60   36.40
  -2  30  -2   14.90   39.50
   4  30   2   30.70   35.20
  -4  30  -2   45.80   36.30
   6  30   2   84.19   40.40
  -6  30  -2   94.39   43.00
  -8  30  -2  238.88   42.10
   8  30   2  190.78   40.80
  10  30   2  183.18   41.20
 -10  30  -2  238.68   42.70
   9  31  -2   16.10   37.10
  -9  31   2    5.20   45.20
   7  31  -2    7.90   38.50
  -7  31   2   10.70   44.30
  -5  31   2  -63.49   46.60
   5  31  -2   35.10   38.00
  -3  31   2   -8.00   40.40
   3  31  -2    5.70   37.90
   1  31  -2  -25.70   34.40
  -1  31   2   36.20   38.00
  -1  31  -2  -25.00   38.80
   1  31   2   46.90   43.70
   3  31   2   28.10   37.80
  -3  31  -2    6.10   36.40
  -5  31  -2   26.50   38.80
   5  31   2   25.60   41.50
   7  31   2   15.40   40.70
  -7  31  -2   14.30   45.40
  -6  32   2   40.50   45.00
   6  32  -2   -3.80   40.30
  -4  32   2   88.89   48.50
   4  32  -2   62.09   40.70
   2  32  -2   77.89   37.60
  -2  32   2   82.99   42.70
   0  32   2   -4.70   44.60
   0  32  -2  -45.90   40.50
   2  32   2   47.20   39.80
  -2  32  -2   21.80   42.60
  -4  32  -2   28.80   40.40
   4  32   2   53.99   45.40
  -6  32  -2   65.69   41.20
   6  32   2   35.30   43.50
   1  33  -2    1.60   44.10
  -1  33   2   -6.70   44.10
  -1  33  -2   -5.80   43.70
   1  33   2   -6.90   46.10
 -24   0   3   36.20   26.50
 -22   0   3   51.19   26.50
 -20   0   3    2.10   20.70
 -18   0   3    8.80   18.30
 -16   0   3  -10.00   30.10
 -14   0   3    3.10   16.20
 -12   0   3    4.40   15.30
 -10   0   3  -21.20   11.60
  -6   0   3   -1.90    9.30
  -4   0   3   -2.20    6.80
  -2   0   3  -14.70    4.10
   2   0   3   -3.10    6.30
  -2   0  -3   -9.80    6.30
  -4   0  -3   -9.60    8.70
  -6   0  -3   41.10   10.90
  -8   0  -3   13.00   12.40
 -10   0  -3  -18.00   13.50
 -12   0  -3  -24.50   15.50
 -14   0  -3  -18.60   16.60
 -16   0  -3  -16.00   18.50
 -18   0  -3   -6.10   21.70
 -20   0  -3   16.10   24.00
 -22   0  -3   42.30   26.90
 -24   0  -3   16.00   31.30
 -25  -1   3  -19.10   28.20
 -25  -1   3   38.90   39.90
 -25   1   3   21.00   28.40
 -23  -1   3   40.10   28.40
 -23   1   3   56.49   29.40
 -21  -1   3   63.39   24.50
 -21   1   3   79.09   23.60
 -19  -1   3   21.40   19.90
 -19   1   3   39.80   20.30
 -17  -1   3   -7.80   19.50
 -17   1   3    1.80   17.50
 -15  -1   3  318.07   23.70
 -15   1   3  295.07   24.40
 -13  -1   3   81.39   15.50
 -13   1   3   65.69   15.30
 -11  -1   3   13.40   12.20
 -11   1   3    2.10   13.10
  -9  -1   3  176.38   14.60
  -9   1   3  161.78   16.10
  -7  -1   3 1818.92   80.59
  -7   1   3 1846.22   81.09
  -5  -1   3 1588.74   69.49
  -5   1   3 1589.64   69.79
  -3  -1   3 1712.23   73.69
  -3   1   3 1677.13   74.19
   1  -1   3  120.99   12.70
  -5  -1  -3  194.18   15.10
  -5   1  -3  188.48   15.40
  -7  -1  -3  119.39   13.10
  -7   1  -3  139.79   13.90
  -9  -1  -3   34.40   13.50
  -9   1  -3   37.50   14.10
 -11  -1  -3  222.88   20.90
 -11   1  -3  217.98   21.70
 -13  -1  -3   90.09   17.20
 -13   1  -3  114.29   18.50
 -15  -1  -3   17.00   17.60
 -15   1  -3  -10.60   17.80
 -17  -1  -3    7.70   19.50
 -17   1  -3   11.00   21.30
 -19  -1  -3   29.50   22.80
 -19   1  -3   46.40   23.00
 -21  -1  -3   28.00   24.80
 -21  -1  -3   50.19   27.20
 -21   1  -3   -5.70   25.30
 -23  -1  -3    3.20   28.90
 -23   1  -3   27.10   32.30
 -25  -1  -3    9.00   31.60
 -25   1  -3   12.00   31.50
 -24  -2   3  122.69   39.70
 -24  -2   3   74.29   27.40
 -24   2   3   87.79   28.50
 -22  -2   3   25.40   26.30
 -22  -2   3   41.60   37.10
 -22   2   3   44.10   28.10
 -20  -2   3  -13.10   23.30
 -20   2   3   20.50   24.60
 -18  -2   3   42.70   21.10
 -18   2   3   17.20   22.50
 -16  -2   3    6.30   17.60
 -16   2   3   -3.20   17.40
 -14  -2   3   13.80   15.90
 -14   2   3   -8.60   15.50
 -12  -2   3  628.94   33.30
 -12   2   3  623.44   33.40
 -10  -2   3  134.19   14.00
 -10   2   3  110.19   15.10
  -8  -2   3  975.60   44.20
  -8   2   3  951.60   44.90
  -6  -2   3   15.00    7.50
  -6   2   3   15.80    9.80
  -4  -2   3  735.43   32.40
  -4   2   3  720.13   33.70
  -2  -2   3   18.40   12.30
  -2   2   3   10.30    7.40
   0  -2   3   45.30    9.50
  -2  -2  -3  496.45   24.00
  -2   2  -3  512.35   23.90
  -4  -2  -3    4.50    8.70
  -4   2  -3   -5.50    9.60
  -8  -2  -3  115.39   14.10
  -8   2  -3  127.99   14.70
 -10  -2  -3   95.39   15.20
 -10   2  -3  109.69   16.50
 -12  -2  -3   -3.70   14.30
 -12   2  -3    5.00   12.30
 -14   2  -3  -17.20   17.40
 -16  -2  -3  165.78   21.00
 -16   2  -3  150.68   23.20
 -18  -2  -3   21.90   21.00
 -18  -2  -3   45.60   22.60
 -18   2  -3   33.20   22.90
 -20  -2  -3   36.50   25.80
 -20  -2  -3   52.39   23.20
 -20   2  -3   12.10   24.70
 -22  -2  -3   37.30   28.10
 -22  -2  -3   67.19   28.70
 -22   2  -3   79.59   27.90
 -24  -2  -3   20.30   33.10
 -24   2  -3   36.70   31.00
 -25  -3   3    5.50   28.10
 -25  -3   3   36.90   41.50
 -25   3   3   -8.80   29.30
 -23  -3   3   64.29   37.60
 -23  -3   3   37.30   25.10
 -23   3   3   18.00   26.60
 -21  -3   3   69.19   35.00
 -21  -3   3   15.00   21.70
 -21   3   3   31.70   24.00
 -19  -3   3  133.59   20.90
 -19  -3   3  132.29   33.70
 -19   3   3  123.29   23.50
 -17  -3   3   45.30   23.90
 -17   3   3   18.30   19.00
 -15  -3   3  277.07   22.20
 -15   3   3  273.47   35.00
 -13  -3   3  784.42   39.50
 -13   3   3  772.22   40.20
 -11  -3   3 1018.30   47.20
 -11   3   3  990.30   48.30
  -9  -3   3    2.90   10.90
  -9   3   3  -26.40   14.70
  -7  -3   3  178.68   13.00
  -7   3   3  161.18   14.30
  -5  -3   3  153.48   27.50
  -5  -3   3  169.18   10.80
  -5   3   3  151.68   13.10
  -3  -3   3  543.05   32.80
  -3  -3   3  547.65   23.70
  -3   3   3  528.25   26.10
  -1  -3   3    1.30   11.20
  -1   3   3    4.00    7.70
  -5  -3  -3  349.27   19.50
  -5   3  -3  326.47   20.70
  -7  -3  -3  327.07   15.40
  -7  -3  -3  251.77   19.20
  -7   3  -3  240.48   20.50
  -9  -3  -3 1460.15   65.99
  -9  -3  -3 1485.75   66.79
  -9   3  -3 1459.55   67.29
 -11  -3  -3 1319.37   56.69
 -11  -3  -3 1079.89   55.69
 -11   3  -3 1120.59   56.49
 -13  -3  -3  422.26   28.60
 -13  -3  -3  495.55   31.80
 -13   3  -3  356.66   33.30
 -15  -3  -3  487.95   35.90
 -15  -3  -3  423.46   30.70
 -15   3  -3  396.56   31.80
 -17  -3  -3   37.20   20.80
 -17  -3  -3   47.50   20.60
 -17   3  -3   17.30   22.30
 -19  -3  -3  363.26   34.50
 -19  -3  -3  472.45   43.40
 -19   3  -3  394.16   36.60
 -21  -3  -3   41.10   26.10
 -21  -3  -3    4.00   24.70
 -21   3  -3   25.10   26.20
 -23  -3  -3  -15.70   30.70
 -23   3  -3    7.60   30.70
 -25  -3  -3    6.00   31.70
 -25   3  -3   23.80   32.50
 -24  -4   3   38.40   26.80
 -24  -4   3   56.59   40.10
 -24   4   3   54.49   28.80
 -22  -4   3   29.80   27.00
 -22   4   3   36.70   24.60
 -20  -4   3   49.60   23.60
 -20  -4   3   70.19   33.80
 -20   4   3   27.40   25.90
 -18  -4   3   57.19   20.70
 -18  -4   3   69.99   30.80
 -18   4   3   71.69   22.00
 -16  -4   3   27.20   15.70
 -16  -4   3   21.40   27.60
 -16   4   3   27.50   18.70
 -14  -4   3   54.19   24.50
 -14  -4   3   69.19   14.20
 -14   4   3   65.09   17.10
 -12  -4   3  435.76   25.90
 -12  -4   3  412.16   43.40
 -12   4   3  444.46   27.90
 -10  -4   3    7.90   11.40
 -10   4   3    2.40   16.50
  -8  -4   3  896.11   51.39
  -8  -4   3  893.61   40.50
  -8   4   3  857.11   42.30
  -6  -4   3 1497.35   64.19
  -6  -4   3 1467.75   70.59
  -6   4   3 1417.56   65.59
  -4  -4   3  680.83   29.40
  -4  -4   3  643.04   38.40
  -4   4   3  647.94   31.90
  -2  -4   3   46.60   14.20
   2   4  -3   55.69    5.40
  -2   4   3   56.49    9.90
   0   4  -3  -10.70    6.50
  -4  -4  -3  208.08   15.00
  -4   4  -3  206.88   16.60
  -6  -4  -3  752.72   37.00
  -6   4  -3  823.22   38.20
 -10  -4  -3   54.29   14.30
 -10   4  -3   10.70   15.70
 -12  -4  -3  358.26   25.50
 -12  -4  -3  373.06   27.60
 -12   4  -3  360.16   27.30
 -14  -4  -3    7.00   15.70
 -14   4  -3   14.80   18.00
 -16  -4  -3    8.30   18.60
 -16  -4  -3   -3.70   21.10
 -16   4  -3    8.40   20.60
 -18  -4  -3   60.39   22.20
 -18  -4  -3   43.10   21.90
 -18   4  -3   62.39   23.70
 -20  -4  -3    7.80   25.00
 -20  -4  -3   55.89   23.90
 -20   4  -3   61.29   26.10
 -22  -4  -3   29.80   26.50
 -22   4  -3   21.00   28.00
 -24  -4  -3    4.60   28.90
 -24   4  -3   17.30   31.80
 -25  -5   3   62.29   31.90
 -25  -5   3   26.50   42.40
 -25   5   3   41.60   34.50
 -23  -5   3   46.80   43.90
 -23  -5   3   18.00   27.80
 -23   5   3  153.58   31.60
 -21  -5   3   23.20   35.20
 -21  -5   3   -2.60   21.60
 -21   5   3   37.00   28.40
 -19  -5   3   14.50   21.90
 -19  -5   3   10.80   31.80
 -19   5   3   -4.60   23.00
 -17  -5   3   81.59   30.30
 -17  -5   3   88.19   32.80
 -17   5   3   96.29   24.70
 -15  -5   3  144.29   29.30
 -15  -5   3  164.98   17.10
 -15   5   3  147.99   22.80
 -13  -5   3  993.70   61.79
 -13  -5   3  983.00   47.90
 -13   5   3 1005.80   49.40
 -11  -5   3  599.64   30.80
 -11  -5   3  580.24   44.40
 -11   5   3  584.04   33.30
  -9  -5   3   18.90   10.50
  -9  -5   3   19.50   20.40
  -9   5   3   16.00   14.60
  -7  -5   3 1220.58   53.49
  -7  -5   3 1196.78   62.79
  -7   5   3 1195.18   55.49
  -5  -5   3  139.89    9.80
  -5  -5   3  111.99   19.60
  -5   5   3  119.69   13.40
  -3  -5   3 5312.47  242.38
  -3   5   3 5761.52  239.58
  -1  -5  -3  865.81   40.80
  -1   5  -3  940.61   41.00
  -5   5  -3    8.20   11.80
  -7  -5  -3  145.89   13.40
  -7   5  -3  144.89   16.20
  -9  -5  -3    1.40   12.70
  -9   5  -3   -1.40   15.30
 -11  -5  -3  996.10   49.70
 -11  -5  -3 1022.90   49.10
 -11   5  -3 1067.29   50.69
 -13  -5  -3  352.06   25.10
 -13  -5  -3  329.77   27.80
 -13   5  -3  295.17   27.70
 -15  -5  -3   93.49   18.20
 -15  -5  -3  102.29   19.00
 -15   5  -3  128.99   21.70
 -17  -5  -3  181.98   33.90
 -17  -5  -3  213.68   24.10
 -17   5  -3  231.08   26.10
 -19  -5  -3  263.77   43.50
 -19  -5  -3  323.57   28.50
 -19   5  -3  360.36   30.60
 -21  -5  -3   90.49   29.80
 -21   5  -3  196.78   30.60
 -23  -5  -3  -15.10   31.20
 -23   5  -3   26.30   30.90
 -25  -5  -3    8.50   30.40
 -25   5  -3   49.80   38.60
 -24  -6   3   40.00   29.90
 -24  -6   3   26.90   42.80
 -24   6   3   79.99   28.50
 -22  -6   3    1.20   26.20
 -22  -6   3   22.60   55.69
 -22   6   3    8.20   30.10
 -20  -6   3   -0.10   22.50
 -20  -6   3   16.10   35.00
 -20   6   3   -5.00   24.60
 -18  -6   3  207.08   23.10
 -18  -6   3  185.08   34.00
 -18   6   3  214.88   28.40
 -16  -6   3  101.49   18.40
 -16  -6   3   95.09   28.40
 -16   6   3   97.29   21.10
 -14  -6   3   14.00   24.30
 -14  -6   3   10.30   14.80
 -14   6   3   10.00   22.60
 -12  -6   3   24.10   23.70
 -12  -6   3   29.70   13.20
 -12   6   3   26.30   16.60
 -10  -6   3  398.66   23.30
 -10  -6   3  387.26   39.10
 -10   6   3  335.07   26.30
  -8  -6   3  284.57   34.50
  -8  -6   3  290.17   17.60
  -8   6   3  234.28   21.80
  -6  -6   3  106.19   10.20
  -6  -6   3   99.59   20.70
  -6   6   3  112.89   14.10
  -4  -6   3 1335.87   69.29
  -4  -6   3 1436.66   62.69
  -4   6   3 1550.84   64.89
  -2  -6   3  522.35   33.30
   2   6  -3  409.16   22.80
  -2   6   3  520.65   25.70
   0  -6   3 3067.09  135.89
   0   6  -3 3042.70  132.19
   0   6   3 3038.00  132.79
  -2  -6  -3 3101.69  140.69
   2  -6   3 3215.18  143.69
  -2   6  -3 3404.76  141.09
  -4  -6  -3  290.67   17.90
  -4   6  -3  289.87   19.80
  -6  -6  -3   49.00   11.40
  -6   6  -3   70.19   13.90
 -10  -6  -3  300.77   22.20
 -10   6  -3  301.97   24.90
 -12  -6  -3   -9.60   13.50
 -12  -6  -3   23.10   16.80
 -12   6  -3  -26.20   18.10
 -14  -6  -3  -11.10   19.80
 -14   6  -3    3.70   15.90
 -16  -6  -3   28.10   18.90
 -16  -6  -3  -13.70   19.10
 -16   6  -3   54.49   22.80
 -18  -6  -3   77.29   21.80
 -18   6  -3   76.09   24.70
 -20  -6  -3   42.20   23.90
 -20   6  -3    7.50   26.60
 -22  -6  -3   22.50   27.00
 -22   6  -3   32.30   30.10
 -24  -6  -3  -12.00   30.10
 -24   6  -3   23.50   32.60
 -25  -7   3   27.50   32.10
 -25   7   3   67.09   31.80
 -23  -7   3   -8.30   28.30
 -23   7   3   15.10   28.20
 -21  -7   3   -1.70   25.40
 -21  -7   3  -19.00   37.10
 -21   7   3  -12.70   25.20
 -19  -7   3   -4.90   33.10
 -19  -7   3    6.40   21.60
 -19   7   3   20.30   24.10
 -17  -7   3   18.20   22.50
 -17  -7   3    5.50   30.40
 -17   7   3   -6.80   22.20
 -15  -7   3   20.30   16.70
 -15  -7   3   20.40   26.70
 -15   7   3   11.00   19.70
 -13  -7   3  566.44   30.70
 -13  -7   3  564.94   49.99
 -13   7   3  483.85   37.10
 -11  -7   3  410.76   23.90
 -11  -7   3  406.96   40.80
 -11   7   3  393.26   27.90
  -9  -7   3   91.89   11.30
  -9  -7   3   59.09   23.10
  -9   7   3   86.09   16.60
  -7  -7   3   93.59   22.00
  -7  -7   3  125.59   12.00
  -7   7   3  126.69   16.10
  -5  -7   3  262.67   32.30
  -5  -7   3  246.08   14.00
  -5   7   3  254.87   20.00
  -3  -7   3 2098.19  110.59
   3   7  -3 2610.04  105.69
  -3   7   3 2591.14  107.09
  -1  -7   3 1021.00   52.39
   1   7  -3 1007.60   45.00
  -1   7   3  991.70   46.70
  -3   7  -3   58.39   11.90
  -5   7  -3   18.30   12.80
  -7  -7  -3   -8.70   11.60
  -7   7  -3   -8.90   11.60
 -11  -7  -3   78.89   15.40
 -11   7  -3   58.79   18.70
 -13  -7  -3   40.00   16.90
 -13  -7  -3   84.39   16.90
 -13   7  -3   87.89   20.40
 -15  -7  -3   15.90   18.00
 -15   7  -3    8.20   21.90
 -17  -7  -3   52.09   21.10
 -17   7  -3   46.20   24.70
 -19  -7  -3   28.90   22.50
 -19   7  -3   17.30   25.30
 -21  -7  -3   74.09   25.90
 -21   7  -3   80.19   29.50
 -23  -7  -3   31.60   32.60
 -23   7  -3   12.90   36.80
 -24  -8   3  156.88   32.50
 -24  -8   3   91.59   45.60
 -24   8   3  147.49   33.40
 -22  -8   3   66.09   27.70
 -22   8   3   25.00   32.40
 -20  -8   3  146.59   23.40
 -20  -8   3  153.48   38.40
 -20   8   3  116.99   27.90
 -18  -8   3   36.40   20.80
 -18  -8   3   18.40   33.70
 -18   8   3   33.40   23.80
 -16  -8   3   54.69   16.20
 -16  -8   3   49.10   30.30
 -16   8   3   46.80   21.60
 -14  -8   3   20.60   14.70
 -14  -8   3   -8.10   27.20
 -14   8   3   35.90   19.90
 -12  -8   3   41.10   13.40
 -12  -8   3   35.00   26.10
 -12   8   3   52.49   18.70
 -10  -8   3  384.76   22.40
 -10  -8   3  399.06   40.50
 -10   8   3  353.56   27.50
  -8  -8   3   50.19   10.10
  -8  -8   3   69.59   22.60
  -8   8   3   70.99   17.40
  -6  -8   3  241.58   34.70
  -6  -8   3  189.68   13.20
  -6   8   3  168.68   16.40
  -4  -8   3  174.68   28.60
  -4   8   3  159.08   16.10
  -2  -8   3  436.36   35.00
  -2   8   3  454.45   25.90
   2   8  -3  451.95   22.90
   0   8   3   49.00   12.70
  -2  -8  -3  331.07   19.90
  -2   8  -3  336.67   21.70
  -4  -8  -3  273.37   17.90
  -4   8  -3  271.87   20.20
  -6  -8  -3  780.62   38.70
  -6   8  -3  844.02   40.70
  -8  -8  -3  934.11   43.70
  -8   8  -3  891.81   45.90
 -12  -8  -3   92.29   16.50
 -12  -8  -3   78.09   21.70
 -12   8  -3   91.39   19.70
 -14  -8  -3    9.80   17.20
 -14   8  -3   -7.20   21.20
 -16  -8  -3   69.29   20.20
 -16   8  -3   64.29   24.00
 -18  -8  -3   -4.60   21.40
 -18   8  -3   22.90   25.20
 -20  -8  -3   88.49   25.50
 -20   8  -3   83.19   29.00
 -22  -8  -3   -3.70   27.30
 -22   8  -3    1.20   31.10
 -24  -8  -3   50.29   31.50
 -24   8  -3   47.70   39.40
 -23  -9   3  123.99   30.70
 -23  -9   3   49.70   66.29
 -23   9   3  129.39   32.40
 -21  -9   3  -18.90   40.90
 -21  -9   3   25.70   23.40
 -21   9   3   10.20   32.20
 -19  -9   3   -6.70   22.20
 -19  -9   3    4.60   36.20
 -19   9   3   -3.50   25.60
 -17  -9   3    4.70   22.30
 -17  -9   3  -19.20   31.00
 -17   9   3    1.30   23.70
 -15  -9   3   54.39   29.50
 -15  -9   3  100.09   18.10
 -15   9   3   76.59   22.00
 -13  -9   3  302.77   43.60
 -13  -9   3  331.97   23.80
 -13   9   3  334.57   28.50
 -11  -9   3   32.70   11.90
 -11  -9   3   14.40   24.40
 -11   9   3   21.20   17.90
  -9  -9   3  882.31   41.90
  -9  -9   3  918.11   57.79
  -9   9   3  925.41   46.10
  -7  -9   3    4.70    8.30
  -7  -9   3   55.19   21.60
  -7   9   3    5.60   16.40
  -5  -9   3   35.20    7.60
  -5   9   3   21.80   15.10
  -3  -9   3  178.28   31.90
   1   9  -3 1647.04   71.19
  -1   9   3 1567.54   72.29
   1  -9   3 1169.78   58.99
  -1   9  -3 1001.00   48.90
   1   9   3 1070.59   50.19
  -3  -9  -3   46.80   11.00
  -3   9  -3   57.39   14.60
  -5  -9  -3   85.99   12.00
  -5   9  -3   65.79   15.30
  -7  -9  -3   92.89   13.90
  -7   9  -3   85.99   17.90
  -9  -9  -3   27.90   15.50
  -9   9  -3    3.70   17.20
 -11   9  -3   37.30   32.10
 -13  -9  -3   90.49   21.00
 -13  -9  -3   62.39   24.20
 -13   9  -3  101.19   21.10
 -15  -9  -3    4.90   26.00
 -15  -9  -3   74.79   22.10
 -15   9  -3   66.99   23.70
 -17  -9  -3  392.66   36.60
 -17   9  -3  383.06   36.80
 -19  -9  -3  141.39   25.50
 -19   9  -3  120.99   28.50
 -21  -9  -3   39.80   26.80
 -21   9  -3   36.60   30.30
 -23  -9  -3  107.59   35.10
 -23   9  -3   83.49   35.40
 -24 -10   3  214.38   34.70
 -24  10   3  168.38   39.50
 -22 -10   3   47.70   25.10
 -22  10   3   29.00   31.30
 -20 -10   3   -9.50   38.60
 -20 -10   3    5.00   24.90
 -20  10   3  -12.00   27.30
 -18 -10   3   67.99   21.80
 -18 -10   3    6.80   35.40
 -18  10   3  -21.30   24.80
 -16 -10   3  174.88   20.90
 -16 -10   3  136.29   35.90
 -16  10   3  152.78   25.70
 -14 -10   3   26.40   29.00
 -14 -10   3   -3.80   15.80
 -14  10   3   14.10   21.40
 -12 -10   3   43.90   26.50
 -12 -10   3   70.49   13.60
 -12  10   3   55.09   19.50
 -10 -10   3   63.09   25.40
 -10 -10   3   68.49   12.20
 -10  10   3   47.40   18.60
  -8 -10   3   42.80    9.60
  -8 -10   3   81.39   23.40
  -8  10   3   20.40   17.60
  -6 -10   3  423.26   21.80
  -6  10   3  432.36   28.50
  -2  10   3  196.48   17.80
   2  10  -3  160.88   15.80
  -2  10  -3   17.80   13.50
  -4 -10  -3  286.07   18.80
  -4  10  -3  243.18   21.30
  -6 -10  -3  149.59   14.80
  -6  10  -3  138.89   18.10
  -8 -10  -3  164.98   15.90
  -8  10  -3  173.68   19.70
 -10 -10  -3  111.09   15.70
 -10  10  -3   95.19   19.30
 -12  10  -3    8.50   19.40
 -14 -10  -3   16.10   27.90
 -14 -10  -3   25.20   18.70
 -14  10  -3   11.40   22.40
 -16 -10  -3   69.09   23.60
 -16 -10  -3    3.00   29.40
 -16  10  -3   74.29   26.10
 -18 -10  -3  101.19   24.00
 -18  10  -3  146.39   28.60
 -20 -10  -3   41.40   29.60
 -20  10  -3   30.40   30.00
 -22 -10  -3  -17.20   33.20
 -22  10  -3   44.70   36.60
 -24 -10  -3    1.90   32.20
 -24  10  -3   47.50   36.60
 -23 -11   3  167.68   32.00
 -23  11   3  187.18   35.30
 -21 -11   3  126.59   28.40
 -21  11   3  101.49   31.30
 -19 -11   3   93.29   23.80
 -19 -11   3   37.30   40.30
 -19  11   3   82.49   27.60
 -17 -11   3   -9.80   34.00
 -17 -11   3   -2.90   32.50
 -17  11   3    6.40   25.10
 -15 -11   3  153.18   34.00
 -15 -11   3  192.98   19.50
 -15  11   3  175.78   26.30
 -13 -11   3  193.58   32.50
 -13 -11   3  215.28   19.20
 -13  11   3  214.78   24.40
 -11 -11   3   12.20   26.90
 -11 -11   3   -6.20   12.10
 -11  11   3  -14.30   19.70
  -9 -11   3  472.15   26.10
  -9 -11   3  569.44   49.20
  -9  11   3  495.45   32.50
  -7 -11   3  170.68   14.00
  -7  11   3  167.78   20.10
   5  11  -3 1171.48   53.29
  -5  11   3 1148.99   55.79
  -3  11   3 1352.66   64.39
   3  11  -3 1414.56   62.39
   1  11  -3 2533.35  111.99
  -1  11   3 2573.64  113.09
  -1  11  -3 4105.49  178.28
   1  11   3 4080.99  178.68
  -3  11  -3 1907.11   85.29
  -5 -11  -3   99.49   13.50
  -5  11  -3   96.39   16.90
  -7 -11  -3   76.09   13.90
  -7  11  -3   77.59   17.80
  -9 -11  -3  345.77   23.40
  -9  11  -3  330.97   28.00
 -11 -11  -3  273.37   23.30
 -11  11  -3  290.77   25.50
 -13 -11  -3  269.87   25.50
 -13  11  -3  287.07   26.40
 -15 -11  -3  425.36   31.70
 -15  11  -3  415.76   36.10
 -17 -11  -3  721.43   43.30
 -17  11  -3  730.43   47.40
 -19 -11  -3  171.38   27.20
 -19  11  -3  144.59   31.50
 -21 -11  -3   87.69   31.50
 -21  11  -3   30.60   33.10
 -23 -11  -3  211.68   34.00
 -23  11  -3  150.38   37.40
 -24 -12   3  241.08   36.40
 -24  12   3  195.08   38.20
 -20 -12   3   20.30   25.90
 -20  12   3   15.00   29.70
 -18 -12   3   17.40   22.10
 -18 -12   3  -39.90   38.80
 -18  12   3   19.50   27.50
 -16 -12   3  124.39   20.70
 -16 -12   3   89.99   37.10
 -16  12   3  121.69   26.90
 -14 -12   3  133.49   17.70
 -14 -12   3   97.09   34.10
 -14  12   3  133.69   23.80
 -12 -12   3  449.06   26.20
 -12 -12   3  376.76   51.09
 -12  12   3  455.15   28.40
 -10 -12   3   55.99   29.40
 -10 -12   3   60.19   11.90
 -10  12   3   61.19   25.70
  -8 -12   3  364.26   49.10
  -6 -12   3 1087.79   64.29
   2  12   3  312.97   27.60
  -2  12  -3  311.97   22.50
  -4 -12  -3   54.29   13.40
  -4  12  -3   37.20   16.10
  -6 -12  -3  271.57   22.20
  -6  12  -3  225.18   21.60
  -8 -12  -3   13.80   13.60
  -8  12  -3   -5.50   18.00
 -10 -12  -3  105.69   16.40
 -10  12  -3  129.99   21.00
 -12 -12  -3   -2.70   30.50
 -12  12  -3  -15.10   16.60
 -14 -12  -3   37.10   19.40
 -14  12  -3   19.90   23.70
 -16 -12  -3  146.99   23.50
 -16  12  -3  124.49   26.80
 -18 -12  -3   25.30   23.50
 -18  12  -3  -10.10   22.60
 -20 -12  -3   86.79   27.90
 -20  12  -3   75.09   30.70
 -22 -12  -3   22.20   30.60
 -22  12  -3   48.40   34.30
 -23 -13   3  196.48   34.30
 -23  13   3  208.98   37.70
 -21 -13   3   82.79   29.70
 -21  13   3  130.29   33.60
 -19 -13   3    9.30   24.70
 -19  13   3   41.50   29.50
 -17 -13   3   31.40   25.80
 -17 -13   3  -58.39   39.90
 -17  13   3   42.10   27.40
 -15 -13   3   44.00   38.80
 -15 -13   3   90.89   18.60
 -15  13   3  118.19   25.90
 -13 -13   3  538.75   64.19
 -13 -13   3  626.14   33.90
 -13  13   3  576.04   39.20
 -11 -13   3  398.26   25.20
 -11 -13   3  381.56   53.59
 -11  13   3  375.26   31.70
  -9 -13   3  251.57   18.60
  -9 -13   3  293.87   43.70
   3  13  -3 2390.46  104.99
  -3  13   3 2363.76  106.59
  -1  13   3 3603.44  161.08
   1  13  -3 3725.93  160.18
   1  13   3 2747.72  121.09
  -1  13  -3 2708.73  120.09
   3  13   3  763.02   39.50
  -3  13  -3  732.33   38.50
  -5 -13  -3  220.68   19.80
  -5  13  -3  240.18   21.00
  -7 -13  -3 1630.94   75.19
  -7  13  -3 1697.03   75.89
  -9 -13  -3  871.81   44.50
 -11 -13  -3  964.00   47.70
 -11  13  -3  968.70   51.29
 -13 -13  -3  262.27   23.50
 -13  13  -3  280.57   28.20
 -15 -13  -3  144.29   25.70
 -15  13  -3  140.39   26.70
 -17 -13  -3   42.50   23.00
 -17  13  -3   40.30   27.40
 -19 -13  -3  580.64   42.20
 -19  13  -3  528.15   46.90
 -21 -13  -3  358.66   35.90
 -21  13  -3  356.96   40.30
 -23 -13  -3  126.19   34.90
 -23  13  -3  137.49   38.90
 -22 -14   3  220.48   32.90
 -22  14   3  239.18   38.50
 -20 -14   3   18.80   26.30
 -20  14   3    6.90   31.60
 -18 -14   3   -8.80   22.60
 -18  14   3    8.10   28.90
 -16 -14   3   57.99   20.50
 -16 -14   3  -24.10   41.70
 -16  14   3   43.50   27.80
 -14 -14   3   19.20   38.60
 -14 -14   3   42.20   17.10
 -14  14   3   20.70   24.80
 -12 -14   3  195.68   39.10
 -12 -14   3  198.28   18.30
 -12  14   3  172.48   25.30
 -10 -14   3  323.57   21.90
 -10 -14   3  376.56   57.19
 -10  14   3  319.17   30.10
  -8 -14   3  537.75   50.99
  -4  14   3  866.21   45.40
   4  14  -3  870.11   42.60
   0  14   3  610.84   35.20
   0  14  -3  610.34   34.30
   2  14   3  695.33   38.60
  -2  14  -3  726.53   38.80
  -4  14  -3  678.83   37.00
  -6 -14  -3    7.70   13.90
  -6  14  -3    6.70   17.10
  -8 -14  -3  139.59   16.80
  -8  14  -3  123.79   24.20
 -10 -14  -3   73.99   16.70
 -10  14  -3   85.69   22.00
 -12 -14  -3   -7.30   17.30
 -12  14  -3    4.20   23.00
 -14 -14  -3   68.99   20.70
 -14  14  -3   54.89   25.30
 -16 -14  -3   13.90   22.30
 -16  14  -3   13.90   26.90
 -18 -14  -3   56.39   29.10
 -20 -14  -3   75.99   29.20
 -20  14  -3   87.29   33.10
 -22 -14  -3    8.40   36.30
 -22  14  -3   70.19   36.10
 -21 -15   3   54.79   29.60
 -21  15   3   86.29   35.80
 -19 -15   3   10.20   25.80
 -19  15   3   -0.30   30.80
 -17 -15   3    9.20   21.30
 -17  15   3   24.50   28.20
 -15 -15   3  238.58   21.90
 -15 -15   3  193.98   49.99
 -15  15   3  243.58   30.10
 -13 -15   3  966.40   78.29
 -13 -15   3 1010.60   48.50
 -13  15   3  987.40   54.49
 -11 -15   3  789.12   39.40
 -11 -15   3  802.12   70.59
 -11  15   3  778.12   42.50
  -9 -15   3  669.83   64.69
  -9  15   3  555.44   38.30
   7  15  -3  187.68   18.30
  -7  15   3  120.39   27.20
   5  15  -3  179.38   17.50
  -5  15   3  165.58   21.60
   3  15  -3 1521.35   69.49
  -3  15   3 1507.75   71.49
   1  15  -3  823.42   42.50
  -1  15   3  830.62   44.20
   1  15   3  326.47   27.80
  -1  15  -3  400.26   27.90
   3  15   3  156.28   19.90
  -3  15  -3  160.68   18.60
  -5  15  -3    4.00   17.40
  -7 -15  -3  595.74   34.90
  -7  15  -3  620.54   36.20
  -9 -15  -3  829.52   42.50
  -9  15  -3  846.12   46.10
 -11 -15  -3  421.56   28.50
 -11  15  -3  395.76   33.90
 -13 -15  -3  167.28   21.60
 -13  15  -3  148.19   27.50
 -15 -15  -3  154.58   23.80
 -15  15  -3  163.88   28.00
 -17 -15  -3  351.36   31.70
 -17  15  -3  383.76   36.00
 -19 -15  -3  379.36   37.90
 -19  15  -3  383.46   39.80
 -21 -15  -3  352.76   36.20
 -21  15  -3  360.86   42.40
 -22 -16   3   -4.40   31.40
 -22  16   3   -1.60   36.80
 -20 -16   3    6.70   27.40
 -20  16   3   15.10   32.60
 -18 -16   3   51.09   24.20
 -18  16   3   87.59   32.20
 -16  16   3   -7.20   28.10
 -14 -16   3    7.10   17.90
 -14  16   3   20.00   26.40
 -12 -16   3  412.06   66.79
 -12 -16   3  351.86   27.40
 -12  16   3  373.76   30.10
 -10 -16   3  139.89   46.60
 -10  16   3   19.00   22.90
  -8 -16   3  177.98   46.20
  -8  16   3   -1.30   21.70
   8  16  -3   11.70   15.90
   0  16  -3   10.90   17.10
   0  16   3  -11.30   19.30
  -2  16  -3   72.59   18.80
   2  16   3   49.20   18.60
   4  16   3   12.70   17.90
  -4  16  -3   -4.60   17.40
  -6  16  -3   36.90   19.20
  -8 -16  -3   28.20   15.80
  -8  16  -3   11.30   20.70
 -10 -16  -3  -15.20   18.80
 -10  16  -3    8.80   22.40
 -12 -16  -3   -9.10   21.40
 -12  16  -3  -30.30   23.90
 -14 -16  -3    4.60   23.70
 -14  16  -3  -15.80   27.40
 -16 -16  -3   10.30   23.40
 -16  16  -3    8.20   27.80
 -18 -16  -3    2.80   30.50
 -18  16  -3   -6.00   31.00
 -20 -16  -3   25.70   34.30
 -20  16  -3   47.70   35.00
 -22 -16  -3   73.59   38.40
 -22  16  -3   84.29   39.10
 -21 -17   3  123.39   32.90
 -21  17   3  158.18   38.70
 -19 -17   3   27.40   26.30
 -19  17   3   49.30   35.00
 -17 -17   3  104.79   23.20
 -17  17   3   94.49   32.60
 -15 -17   3  172.58   22.30
 -15 -17   3   97.79   56.59
 -15  17   3  170.18   31.60
 -13 -17   3  774.02   80.39
 -13 -17   3  651.13   38.50
 -13  17   3  608.14   44.60
 -11  17   3  256.27   28.60
  -9 -17   3  566.24   83.59
  -9  17   3  476.45   36.20
   9  17  -3  436.76   30.30
   7  17  -3  107.39   18.80
  -7  17   3   98.19   22.90
  -5 -17   3 1350.06   83.09
   5  17  -3 1338.47   63.19
  -5  17   3 1346.07   65.79
  -3  17   3  649.14   45.00
   3  17  -3  708.03   38.00
   1  17  -3 1223.08   57.69
  -1  17   3 1142.69   58.69
  -1  17  -3  303.67   25.10
   1  17   3  299.97   27.70
  -3  17  -3   73.49   20.60
   3  17   3   36.30   20.00
   5  17   3   83.19   22.00
  -5  17  -3   15.00   19.40
  -7  17  -3  228.98   24.50
  -9 -17  -3  437.86   29.10
  -9  17  -3  423.36   34.80
 -11 -17  -3  797.22   43.10
 -11  17  -3  796.52   47.30
 -13 -17  -3  148.69   24.90
 -13  17  -3   50.39   26.90
 -15 -17  -3  477.15   36.10
 -15  17  -3  464.75   42.00
 -17 -17  -3  366.26   34.70
 -17  17  -3  367.66   37.00
 -19 -17  -3  267.47   33.40
 -19  17  -3  264.97   38.00
 -21 -17  -3   94.49   37.30
 -21  17  -3  126.39   37.40
 -20 -18   3   65.09   29.50
 -20  18   3   54.69   36.70
 -18 -18   3   18.20   25.00
 -18  18   3   -0.40   32.00
 -16 -18   3    6.80   22.90
 -16  18   3   12.30   29.20
 -14 -18   3   26.40   19.00
 -14 -18   3   -5.80   58.79
 -14  18   3   42.80   29.30
 -12  18   3  202.98   29.30
 -10  18   3   73.59   25.80
  -4  18   3  257.87   27.10
   4  18  -3  255.77   22.60
  -2  18   3   53.69   22.20
   2  18  -3   41.30   19.00
   0  18   3  120.39   26.60
   0  18  -3  118.99   18.80
  -2  18  -3    0.70   20.40
   2  18   3   12.50   20.00
   4  18   3    4.10   20.20
  -4  18  -3  -22.90   19.00
  -6  18  -3   34.40   21.20
  -8  18  -3   15.10   22.10
 -10 -18  -3    3.30   21.10
 -10  18  -3    4.90   24.30
 -12 -18  -3   61.99   23.70
 -12  18  -3    2.90   26.10
 -14 -18  -3    6.70   25.90
 -14  18  -3   -7.10   22.70
 -16 -18  -3   43.80   25.20
 -16  18  -3   20.30   30.80
 -18 -18  -3   -4.00   27.20
 -18  18  -3   15.20   33.20
 -20 -18  -3  -12.20   31.60
 -20  18  -3   20.20   36.30
 -21 -19   3   61.99   32.50
 -21  19   3   86.09   38.40
 -19 -19   3   19.50   27.10
 -19  19   3   57.19   38.10
 -17 -19   3  148.69   28.10
 -17  19   3  190.68   36.70
 -15 -19   3  205.18   24.10
 -15  19   3  252.77   35.00
 -13 -19   3  454.55   70.99
 -13  19   3  344.67   34.80
 -11 -19   3  580.74   70.19
  11  19  -3  397.06   32.10
 -11  19   3  388.86   40.40
  -9  19   3   34.00   26.40
  -5  19   3  377.56   33.70
   5  19  -3  330.17   29.10
  -3  19   3  396.86   34.80
   3  19  -3  438.46   29.20
   1  19  -3  281.37   25.50
  -1  19   3  270.47   27.10
  -1  19  -3  321.67   30.80
   1  19   3  308.27   29.70
  -3  19  -3   73.69   21.20
   3  19   3   62.59   22.60
   5  19   3   41.60   21.70
  -5  19  -3   29.20   20.60
   7  19   3  524.15   35.30
  -7  19  -3  493.85   36.50
  -9  19  -3  117.79   25.10
 -11 -19  -3 1016.10   51.59
 -11  19  -3  979.50   55.79
 -13 -19  -3  316.37   29.80
 -13  19  -3  286.27   33.70
 -15 -19  -3   30.90   28.30
 -15  19  -3   44.30   30.10
 -17 -19  -3  136.99   32.80
 -17  19  -3  200.88   35.90
 -19 -19  -3   38.30   34.70
 -19  19  -3  121.09   37.60
 -20 -20   3   63.39   32.60
 -20  20   3   83.19   40.00
 -18 -20   3   32.20   27.50
 -18  20   3   23.30   35.80
 -16 -20   3   36.20   25.20
 -16  20   3   23.80   33.10
 -14 -20   3 -132.09   72.49
 -14  20   3   54.09   30.70
 -12 -20   3  165.38   70.79
  12  20  -3   14.00   21.40
 -12  20   3   23.20   30.20
   4  20  -3   94.39   21.20
  -4  20   3   31.30   25.00
  -2  20   3   25.50   24.30
   2  20  -3   35.00   19.10
   0  20  -3   92.49   20.30
   0  20   3   86.59   24.20
   2  20   3  109.49   23.40
  -2  20  -3   60.69   40.90
  -4  20  -3   41.50   21.20
   4  20   3   35.60   22.40
   6  20   3   -2.40   24.70
  -6  20  -3    3.70   26.10
  -8  20  -3    8.10   24.50
 -10  20  -3  227.98   30.40
 -12 -20  -3  -15.70   21.70
 -12  20  -3  -15.90   27.70
 -14 -20  -3   36.30   24.30
 -14  20  -3   11.70   30.30
 -16 -20  -3  114.19   31.20
 -16  20  -3  155.28   34.60
 -18 -20  -3   24.70   33.40
 -18  20  -3   17.90   36.00
 -20 -20  -3  -28.20   38.90
 -20  20  -3   36.00   38.30
 -19 -21   3   32.50   29.50
 -19  21   3  101.49   40.70
 -17 -21   3  174.38   28.70
 -17  21   3  156.18   38.10
 -15  21   3  136.79   35.60
 -13 -21   3  351.66   81.89
  13  21  -3  524.35   40.80
 -13  21   3  384.76   39.40
 -11  21   3  506.75   43.20
  11  21  -3  469.95   35.90
   9  21  -3  146.09   23.40
  -9  21   3  133.69   30.80
   5  21  -3  649.24   38.60
  -5  21   3  693.33   45.40
   3  21  -3  883.61   47.20
  -3  21   3  915.01   52.09
  -1  21   3 1427.06   71.29
   1  21  -3 1412.26   69.59
   1  21   3  162.58   28.80
  -1  21  -3  150.88   27.30
   3  21   3   88.39   25.10
  -3  21  -3  131.29   23.10
  -5  21  -3  101.19   25.20
   5  21   3   98.09   24.40
  -7  21  -3  469.15   41.40
   7  21   3  430.96   35.40
  -9  21  -3  356.36   32.90
 -11  21  -3 1265.37   67.19
 -13 -21  -3  404.16   35.20
 -13  21  -3  434.56   42.60
 -15 -21  -3   24.60   26.10
 -15  21  -3   43.90   32.90
 -17 -21  -3   31.90   30.00
 -17  21  -3   79.19   36.00
 -19 -21  -3   85.59   37.90
 -19  21  -3  121.29   39.60
 -18  22   3   40.20   40.00
 -16  22   3   93.89   38.60
  14  22  -3  261.77   30.20
 -14  22   3  268.77   38.20
 -12 -22   3  209.78   84.99
 -12  22   3  197.88   34.70
  12  22  -3  295.07   28.90
  10  22  -3  110.99   30.60
 -10  22   3  132.19   32.20
  -8  22   3   82.89   29.80
   8  22  -3   80.49   24.60
   6  22  -3  231.88   26.40
  -6  22   3  209.08   31.80
   4  22  -3  195.88   23.80
  -4  22   3  197.98   29.70
  -2  22   3  275.57   30.80
   0  22   3   -6.90   25.50
   0  22  -3  -18.30   21.80
  -2  22  -3   12.60   22.80
   2  22   3   13.60   26.00
   4  22   3   81.19   25.30
  -4  22  -3   80.79   24.60
  -6  22  -3   80.29   25.70
   6  22   3   33.80   25.30
   8  22   3   30.90   28.50
  -8  22  -3   27.90   26.10
 -10  22  -3  -44.40   27.90
 -12  22  -3   49.00   31.60
 -14 -22  -3   15.80   29.30
 -14  22  -3   15.10   31.60
 -16 -22  -3   -9.60   29.10
 -16  22  -3   58.59   36.10
 -18 -22  -3  -17.80   35.80
 -18  22  -3   32.30   39.50
 -17  23   3  110.69   39.00
  15  23  -3  101.19   29.80
 -15  23   3   78.39   36.80
  13  23  -3  453.45   39.20
 -13  23   3  533.65   48.10
 -11  23   3   74.69   32.80
  11  23  -3  102.59   25.70
   9  23  -3  559.84   45.20
  -9  23   3  556.14   47.40
  -7  23   3  261.87   34.10
  -5  23   3 1085.39   61.59
   3  23  -3  993.40   54.79
  -3  23   3  993.60   57.99
   1  23  -3  714.43   43.10
  -1  23   3  715.13   47.90
   1  23   3  756.32   49.00
  -1  23  -3  772.22   45.70
  -3  23  -3  422.56   40.40
   3  23   3  389.06   34.00
   5  23   3  129.99   27.60
  -5  23  -3  153.98   28.30
   7  23   3  510.05   44.10
  -7  23  -3  478.35   41.20
   9  23   3 1366.36   71.79
  -9  23  -3 1351.76   71.09
 -11  23  -3  534.95   45.60
  11  23   3  495.35   40.80
 -13  23  -3  401.16   39.50
 -15 -23  -3  285.37   37.10
 -15  23  -3  295.67   40.70
 -17 -23  -3  154.78   37.20
 -17  23  -3  159.68   41.00
  16  24  -3  215.98   31.60
 -16  24   3  152.58   46.80
 -14  24   3  197.58   37.90
  14  24  -3  154.18   31.80
 -12  24   3  319.27   39.70
  12  24  -3  298.17   31.30
 -10  24   3   49.20   34.10
  10  24  -3   54.39   27.30
   8  24  -3   29.10   26.50
  -8  24   3   47.30   34.20
   6  24  -3  -12.00   26.10
  -6  24   3    5.40   35.00
   4  24  -3  387.66   38.30
  -4  24   3  393.96   37.60
   2  24  -3   83.99   27.20
  -2  24   3   44.50   30.70
   0  24   3    1.70   28.40
   0  24  -3  -37.30   24.00
   2  24   3   72.99   32.60
  -2  24  -3   84.09   29.70
  -4  24  -3   56.99   27.20
   4  24   3   36.60   27.10
  -6  24  -3   26.10   28.30
   6  24   3   17.60   27.10
  -8  24  -3   17.20   30.00
   8  24   3   37.90   27.90
 -10  24  -3   42.90   31.90
  10  24   3   16.90   31.90
 -12  24  -3   24.60   33.50
  12  24   3   12.60   28.90
 -14  24  -3   37.00   35.30
 -16  24  -3   39.20   39.20
  15  25  -3  224.88   32.90
 -15  25   3  223.58   47.40
 -13  25   3  178.88   39.40
  13  25  -3  124.99   31.80
 -11  25   3   58.59   37.30
  11  25  -3   98.99   27.70
  -9  25   3  100.89   35.80
   9  25  -3  110.59   29.70
   7  25  -3   -9.90   27.60
  -7  25   3   39.40   33.90
   5  25  -3  216.98   29.90
  -5  25   3  204.28   35.10
   3  25  -3  932.21   56.39
  -3  25   3  970.50   58.59
   1  25  -3 1402.66   73.59
  -1  25   3 1444.56   78.39
  -1  25  -3  663.03   43.60
   1  25   3  579.64   47.20
   3  25   3  389.66   36.40
  -3  25  -3  441.06   39.40
   5  25   3  112.29   30.60
  -5  25  -3  135.19   29.20
   7  25   3  390.76   36.00
  -7  25  -3  385.46   36.60
  -9  25  -3  997.30   58.99
   9  25   3  908.71   56.19
 -11  25  -3  259.97   40.60
  11  25   3  235.28   36.60
 -13  25  -3  122.39   37.60
  13  25   3   98.39   35.70
 -15  25  -3  202.08   41.50
  14  26  -3   40.10   30.20
 -14  26   3   58.29   40.80
  12  26  -3   45.10   30.90
 -12  26   3   62.29   39.90
 -10  26   3   31.60   37.90
  10  26  -3   41.70   28.70
   8  26  -3   10.40   28.10
  -8  26   3  -43.70   35.20
  -6  26   3   -8.60   32.90
   6  26  -3   14.10   28.10
   4  26  -3   -6.40   29.90
  -4  26   3   -2.10   32.80
  -2  26   3   -0.20   31.60
   2  26  -3    8.00   26.50
   0  26  -3   31.20   27.40
   0  26   3   20.10   32.20
  -2  26  -3   28.90   32.30
   2  26   3   15.10   31.10
   4  26   3   49.99   34.50
  -4  26  -3   -4.50   33.00
   6  26   3  -22.10   33.40
  -6  26  -3    4.30   29.10
   8  26   3   27.30   33.70
  -8  26  -3   15.10   31.90
 -10  26  -3   -2.00   34.00
  10  26   3   42.10   31.20
 -12  26  -3   20.50   36.80
  12  26   3   30.40   31.50
  14  26   3   17.40   36.70
 -14  26  -3   23.30   37.50
 -13  27   3   44.60   42.30
  13  27  -3   -7.00   33.30
 -11  27   3   20.80   41.50
  11  27  -3   37.40   31.00
  -9  27   3   45.80   39.40
   9  27  -3   53.09   30.80
   7  27  -3   35.60   30.50
  -7  27   3   58.79   37.70
   5  27  -3  235.58   33.90
  -5  27   3  203.58   37.60
   3  27  -3  466.95   39.20
  -3  27   3  441.86   45.80
  -1  27   3  297.37   37.80
   1  27  -3  238.58   32.30
   1  27   3   61.69   33.70
  -1  27  -3   35.70   29.20
   3  27   3   38.60   32.70
  -3  27  -3   22.10   30.10
   5  27   3    9.20   31.40
  -5  27  -3  -24.50   31.40
  -7  27  -3  189.28   34.50
   7  27   3  162.88   33.50
  -9  27  -3  147.99   37.00
   9  27   3  154.98   38.00
  11  27   3  124.19   37.30
 -11  27  -3  152.98   37.60
  13  27   3   41.00   39.10
 -13  27  -3   41.70   39.40
  12  28  -3    3.30   32.30
 -12  28   3   40.20   44.00
  10  28  -3   36.10   34.30
 -10  28   3  121.19   41.80
   8  28  -3   50.19   32.00
  -8  28   3   48.10   39.20
  -6  28   3   87.49   38.40
   6  28  -3   69.59   32.80
  -4  28   3   71.49   37.80
   4  28  -3   97.59   34.10
  -2  28   3  -10.00   35.70
   2  28  -3    9.20   33.50
   0  28  -3   37.20   34.40
   0  28   3   66.79   35.20
   2  28   3   27.40   34.40
  -2  28  -3   16.40   34.90
  -4  28  -3   53.79   32.50
   4  28   3   52.59   33.80
  -6  28  -3   49.99   34.60
   6  28   3    6.30   37.00
   8  28   3  106.69   33.60
  -8  28  -3  101.19   35.60
 -10  28  -3   32.60   37.20
  10  28   3   -6.40   37.20
  12  28   3    7.90   38.80
 -12  28  -3   39.90   40.70
 -11  29   3   22.80   42.80
  11  29  -3   28.30   35.90
   9  29  -3   40.20   34.60
  -9  29   3   29.80   40.30
   7  29  -3  115.29   33.70
  -7  29   3  158.98   42.40
   5  29  -3  342.97   39.00
  -5  29   3  314.57   44.50
  -3  29   3  444.46   46.70
   3  29  -3  469.95   42.60
   1  29  -3  510.85   51.19
  -1  29   3  553.74   52.39
   1  29   3   99.19   37.40
  -1  29  -3  135.29   33.60
   3  29   3   -0.60   34.60
  -3  29  -3   33.90   33.30
  -5  29  -3   16.40   34.20
   5  29   3   33.40   39.50
   7  29   3   31.50   34.70
  -7  29  -3   59.39   37.00
   9  29   3   66.89   34.40
  -9  29  -3   88.09   37.60
  11  29   3   19.40   34.00
 -11  29  -3   89.99   45.30
  10  30  -3   25.10   34.90
 -10  30   3   35.00   45.50
   8  30  -3  -28.80   35.00
  -8  30   3   28.90   43.10
   6  30  -3  -14.30   34.80
  -6  30   3   32.40   41.30
   4  30  -3   13.60   33.80
  -4  30   3    3.80   38.80
   2  30  -3   -1.40   36.00
  -2  30   3   19.70   38.50
   0  30  -3  -11.00   32.80
   0  30   3   19.90   39.50
   2  30   3   -9.00   37.00
  -2  30  -3   -0.30   39.00
   4  30   3   56.99   36.80
  -4  30  -3   16.20   36.10
   6  30   3  121.59   37.00
  -6  30  -3   54.79   42.30
   8  30   3   26.80   36.10
  -8  30  -3   72.29   38.20
  10  30   3   18.70   35.40
 -10  30  -3   56.39   41.30
  -7  31   3   56.99   45.20
   7  31  -3   51.59   37.10
  -5  31   3   63.59   44.80
   5  31  -3   65.19   32.80
   3  31  -3  125.39   38.80
  -3  31   3   80.09   46.60
   1  31  -3  188.48   36.60
  -1  31   3  210.58   43.10
   1  31   3  151.38   40.80
  -1  31  -3   29.30   39.70
   3  31   3   16.30   43.40
  -3  31  -3   46.20   41.30
  -5  31  -3   38.40   38.80
   5  31   3   -1.60   38.30
  -7  31  -3   41.30   44.10
   7  31   3   48.40   38.40
  -6  32   3  116.69   53.59
   6  32  -3  123.99   39.90
  -4  32   3   25.20   44.50
   4  32  -3   72.69   39.40
   2  32  -3   42.90   35.00
  -2  32   3    6.40   47.90
   0  32  -3   74.39   41.50
   0  32   3   60.19   42.50
  -2  32  -3  113.59   43.40
   2  32   3  124.59   48.10
  -4  32  -3    7.40   39.50
   4  32   3   10.40   41.00
   6  32   3   22.40   40.00
 -24   0   4  289.67   31.10
 -22   0   4   78.99   27.00
 -20   0   4   19.20   20.90
 -18   0   4  126.79   19.80
 -16   0   4  362.56   25.60
 -14   0   4 1142.69   53.89
 -12   0   4 1059.79   49.70
 -10   0   4 1115.39   51.19
  -8   0   4  185.48   14.60
  -6   0   4  669.63   31.50
  -2   0   4 2097.69   90.99
  -2   0  -4 6449.85  280.17
   2   0   4 6538.55  281.17
   4   0   4 1326.87   52.09
  -4   0  -4  961.90   51.79
  -6   0  -4 6992.70  302.27
  -8   0  -4 3173.08  138.99
 -10   0  -4  535.45   30.50
 -12   0  -4   92.89   17.00
 -14   0  -4  194.48   20.90
 -16   0  -4   -9.20   19.90
 -18   0  -4  931.81   50.79
 -20   0  -4  403.26   36.70
 -22   0  -4  437.96   51.09
 -22   0  -4  370.16   35.60
 -24   0  -4  339.17   37.70
 -25  -1   4  107.69   43.20
 -25  -1   4  131.99   32.30
 -25   1   4  103.39   33.30
 -23  -1   4   67.09   24.70
 -23   1   4   87.39   25.80
 -21  -1   4  117.79   25.20
 -21   1   4   99.09   23.80
 -19  -1   4    5.70   19.40
 -19   1   4    9.50   19.80
 -17  -1   4  961.40   49.30
 -17   1   4  927.51   48.00
 -15  -1   4  762.02   41.60
 -15   1   4  834.12   42.80
 -13  -1   4  210.78   18.40
 -13   1   4  199.38   17.80
 -11  -1   4  105.99   14.50
 -11   1   4  105.39   14.10
  -9  -1   4  -14.30   11.30
  -9   1   4  -25.80   12.60
  -7  -1   4  197.48   15.40
  -7   1   4  209.88   16.70
  -5  -1   4  120.89   10.30
  -5   1   4  136.89   13.00
  -3  -1   4    5.20    5.00
  -3   1   4   15.30    7.20
   1  -1   4 5155.88  221.38
  -1  -1  -4 4945.81  219.48
  -1   1  -4 5160.48  219.38
  -3  -1  -4   82.19    9.50
  -3   1  -4   74.59    9.00
   3   1   4   60.09    8.50
  -5  -1  -4 1609.34   71.39
  -5   1  -4 1607.74   71.39
  -7  -1  -4  635.84   32.40
  -7   1  -4  649.14   32.50
  -9  -1  -4  455.35   24.30
  -9   1  -4  429.26   26.90
 -11  -1  -4  -14.50   14.50
 -11   1  -4   -8.80   15.90
 -13  -1  -4   27.90   17.00
 -15  -1  -4  156.88   21.40
 -15   1  -4  167.98   21.80
 -17  -1  -4   22.80   21.10
 -17   1  -4   15.90   21.00
 -19  -1  -4   55.79   24.00
 -19   1  -4   47.40   24.70
 -21  -1  -4   47.60   24.80
 -21  -1  -4   16.00   25.90
 -21   1  -4   32.40   26.60
 -23  -1  -4   36.30   30.20
 -23   1  -4   16.80   33.80
 -25  -1  -4    3.00   36.20
 -25   1  -4   24.00   33.40
 -24  -2   4  379.56   68.09
 -24  -2   4  323.77   34.20
 -24   2   4  327.87   33.00
 -22  -2   4   98.69   37.40
 -22  -2   4  101.79   23.60
 -22   2   4  115.79   28.00
 -20  -2   4  176.68   25.20
 -20   2   4  207.58   25.80
 -18  -2   4    2.50   20.00
 -18   2   4   17.90   19.70
 -16  -2   4  176.38   18.50
 -16   2   4  177.28   25.50
 -14  -2   4  713.63   37.70
 -14   2   4  718.23   37.70
 -12  -2   4  882.21   42.50
 -12   2   4  845.02   42.30
 -10  -2   4  862.91   40.70
 -10   2   4  848.82   41.40
  -8  -2   4  451.25   23.00
  -8   2   4  431.46   24.30
  -6  -2   4 1157.58   51.79
  -6   2   4 1184.98   53.09
  -4  -2   4  113.29    8.40
  -4   2   4  120.09   11.00
  -2  -2   4 1513.25   69.79
  -2  -2   4 1753.92   75.69
  -2   2   4 1590.74   70.69
   0  -2  -4 2535.35  112.79
   0  -2   4 2707.83  116.19
   0   2  -4 2568.04  112.79
  -2  -2  -4 1870.51   80.49
   2  -2   4 1771.92   82.39
  -2   2  -4 1879.11   80.39
  -4  -2  -4 1485.05   66.19
   4   2   4 1502.05   65.39
  -4   2  -4 1494.05   66.29
  -6  -2  -4 3258.97  145.19
  -6   2  -4 3407.16  145.39
  -8  -2  -4 1395.66   63.79
  -8   2  -4 1406.16   63.19
 -10  -2  -4   43.80   14.70
 -10   2  -4   18.50   14.80
 -12  -2  -4   42.40   16.00
 -12   2  -4   27.10   16.50
 -14  -2  -4   13.00   17.20
 -14   2  -4   24.20   18.70
 -16  -2  -4  102.39   18.40
 -16  -2  -4   72.09   20.90
 -16   2  -4   52.99   21.20
 -18  -2  -4  694.83   43.60
 -18  -2  -4  551.74   39.90
 -18   2  -4  549.45   40.30
 -20  -2  -4  726.13   47.70
 -20  -2  -4  573.94   43.50
 -20   2  -4  596.94   44.00
 -22  -2  -4  479.35   41.30
 -22   2  -4  445.06   41.60
 -24  -2  -4  277.37   34.30
 -24   2  -4  238.18   35.80
 -25  -3   4   44.10   32.90
 -25  -3   4   74.49   52.09
 -25   3   4   71.99   30.40
 -23  -3   4   27.20   27.20
 -23  -3   4   34.30   39.40
 -23   3   4  -10.30   25.90
 -21  -3   4  134.39   35.60
 -21  -3   4   69.49   24.80
 -21   3   4   97.49   23.90
 -19  -3   4   58.29   31.10
 -19  -3   4   36.70   21.60
 -19   3   4   51.49   24.00
 -17  -3   4  343.57   32.50
 -17   3   4  368.96   29.40
 -15  -3   4  488.05   30.50
 -15   3   4  486.45   30.90
 -13  -3   4   -2.70   13.80
 -13   3   4  -11.20   14.90
 -11  -3   4  161.98   16.40
 -11   3   4  166.18   18.70
  -9  -3   4  599.74   28.10
  -9   3   4  513.75   29.90
  -7  -3   4  178.08   13.30
  -7   3   4  199.88   18.20
  -5  -3   4 1290.37   54.99
  -5  -3   4 1218.58   64.39
  -5   3   4 1259.17   56.39
  -3  -3   4   14.50   15.50
  -3   3   4   23.60    9.00
  -1  -3   4  507.05   33.70
  -1   3   4  495.15   24.50
   1  -3   4 2308.27  108.99
  -1  -3  -4 2435.36  106.69
  -1   3  -4 2619.94  106.49
  -5  -3  -4   13.00   10.30
  -5   3  -4   -7.60   11.10
  -7  -3  -4  343.07   22.10
  -7   3  -4  371.76   23.10
  -9  -3  -4  665.93   35.40
  -9   3  -4  713.13   36.20
 -11  -3  -4  136.39   16.60
 -11   3  -4  136.59   18.30
 -13  -3  -4  198.28   21.40
 -13  -3  -4  219.48   21.20
 -13   3  -4  188.08   25.90
 -15  -3  -4   80.29   16.10
 -15  -3  -4   72.89   19.90
 -15   3  -4   54.19   20.70
 -17  -3  -4  131.19   19.40
 -17  -3  -4  155.48   25.60
 -17   3  -4  122.09   23.30
 -19  -3  -4  -19.60   24.90
 -19  -3  -4  -10.20   22.70
 -19   3  -4   -9.20   23.90
 -21  -3  -4   17.10   25.00
 -21   3  -4   31.90   26.80
 -23  -3  -4   22.90   32.70
 -23   3  -4   -6.10   30.00
 -25  -3  -4    1.20   32.00
 -25   3  -4   11.30   33.00
 -24  -4   4  210.98   31.90
 -24  -4   4  196.38   42.50
 -24   4   4  156.28   30.20
 -22  -4   4  103.59   27.00
 -22  -4   4   98.99   39.20
 -22   4   4  116.19   28.60
 -20  -4   4   25.70   51.49
 -20  -4   4  -22.20   19.70
 -20   4   4  -10.80   25.00
 -18  -4   4   43.30   32.20
 -18  -4   4   31.90   20.10
 -18   4   4   21.40   21.20
 -16  -4   4   84.39   17.30
 -16  -4   4   64.89   28.80
 -16   4   4   54.79   19.20
 -14  -4   4  673.13   51.29
 -14  -4   4  633.94   35.40
 -14   4   4  691.73   36.70
 -12  -4   4  619.04   47.80
 -12  -4   4  631.54   32.30
 -12   4   4  617.94   34.10
 -10  -4   4 1567.64   79.39
 -10  -4   4 1621.14   70.99
 -10   4   4 1592.94   72.39
  -8  -4   4    7.20   20.90
  -8  -4   4   24.80    8.60
  -8   4   4   29.50   12.90
  -6  -4   4  115.59    9.50
  -6  -4   4  100.19   21.10
  -6   4   4  112.89   13.00
  -4  -4   4  731.73   42.90
  -4  -4   4  725.03   32.60
  -4   4   4  754.92   35.10
  -2  -4   4 1063.79   55.49
  -2   4   4 1058.69   47.90
   0  -4  -4   25.30    8.10
   0   4  -4   18.10    6.60
  -2  -4  -4  520.15   24.10
  -2   4  -4  448.96   23.80
  -6  -4  -4  220.68   17.10
  -6   4  -4  208.18   15.90
  -8  -4  -4  961.30   46.80
  -8   4  -4 1030.00   46.70
 -10  -4  -4  223.68   20.80
 -10   4  -4  241.48   20.20
 -12  -4  -4   71.09    9.30
 -12  -4  -4  125.29   16.80
 -12   4  -4  100.19   17.90
 -14  -4  -4   14.20   17.00
 -14  -4  -4  -13.20   12.30
 -14   4  -4    0.50   17.90
 -16  -4  -4   28.40   19.50
 -16  -4  -4   18.10   16.10
 -16   4  -4   49.00   21.50
 -18  -4  -4  361.36   31.80
 -18  -4  -4  282.07   31.90
 -18   4  -4  391.96   33.60
 -20  -4  -4  304.57   25.30
 -20  -4  -4  406.76   34.80
 -20   4  -4  417.96   36.90
 -22  -4  -4  413.56   39.50
 -22   4  -4  410.36   37.50
 -24  -4  -4   49.10   30.80
 -24   4  -4   31.50   32.80
 -25  -5   4   29.20   28.10
 -25  -5   4   43.20   44.70
 -25   5   4    4.60   30.30
 -23  -5   4   16.80   26.70
 -23  -5   4   25.70   39.70
 -23   5   4   14.20   30.60
 -21  -5   4   51.09   37.60
 -21  -5   4    4.40   25.20
 -21   5   4   14.10   24.70
 -19  -5   4  119.19   20.50
 -19  -5   4   96.49   33.00
 -19   5   4  117.69   23.70
 -17  -5   4   65.79   17.10
 -17  -5   4   69.79   31.50
 -17   5   4   88.19   21.40
 -15  -5   4  330.27   23.30
 -15  -5   4  362.56   48.80
 -15   5   4  307.57   27.20
 -13  -5   4  394.66   43.30
 -13  -5   4  400.66   25.40
 -13   5   4  400.26   27.80
 -11  -5   4   19.30   12.30
 -11  -5   4   18.20   23.70
 -11   5   4    0.70   15.40
  -9  -5   4   26.00   10.50
  -9  -5   4    0.70   22.10
  -9   5   4   14.10   16.20
  -7  -5   4 1476.55   63.69
  -7  -5   4 1397.66   73.89
  -7   5   4 1462.45   65.59
  -5  -5   4 1626.94   70.29
  -5  -5   4 1610.44   78.09
  -5   5   4 1619.24   72.19
  -3  -5   4   86.49   19.30
   3   5  -4  101.99    6.60
  -3   5   4  109.49   12.70
  -1  -5   4  429.56   30.80
  -1   5   4  429.86   22.10
   1   5  -4  445.66   20.70
  -3  -5  -4  242.38   16.40
  -3   5  -4  258.97   17.00
  -5  -5  -4  594.24   29.60
  -5   5  -4  582.34   30.50
  -7  -5  -4  -10.50   11.60
  -7   5  -4  -19.90   14.10
  -9  -5  -4  113.69   14.70
  -9   5  -4   98.89   17.40
 -11  -5  -4   23.80   14.50
 -11   5  -4   13.00   17.00
 -13  -5  -4   62.69   10.60
 -13  -5  -4   95.59   20.80
 -13   5  -4   91.09   19.20
 -15  -5  -4  139.29   20.10
 -15   5  -4  136.19   22.00
 -17  -5  -4  413.26   32.90
 -17   5  -4  438.46   35.30
 -19  -5  -4   22.50   22.20
 -19   5  -4   25.30   26.00
 -21  -5  -4  120.49   26.80
 -21   5  -4  126.59   29.60
 -23  -5  -4  102.99   29.40
 -23   5  -4   87.49   31.30
 -24  -6   4   46.30   43.40
 -24  -6   4   55.29   30.00
 -24   6   4   69.89   29.20
 -22  -6   4   10.30   23.00
 -22  -6   4   19.50   38.50
 -22   6   4    6.50   25.90
 -20  -6   4  110.89   43.80
 -20  -6   4  129.49   24.60
 -20   6   4  127.69   26.00
 -18  -6   4   41.50   32.70
 -18  -6   4   21.70   20.70
 -18   6   4   42.10   22.50
 -16  -6   4  105.69   30.30
 -16  -6   4  129.39   18.20
 -16   6   4  140.39   22.30
 -14  -6   4  459.35   50.89
 -14  -6   4  511.75   29.10
 -12  -6   4 2109.09   92.89
 -12  -6   4 2121.49  103.59
 -12   6   4 2061.89   94.59
 -10  -6   4 1746.43   89.19
 -10  -6   4 1806.92   78.29
 -10   6   4 1737.23   80.09
  -8  -6   4    8.40   19.60
  -8  -6   4    9.40    8.40
  -8   6   4   25.60   14.80
  -6  -6   4  329.17   32.90
  -6  -6   4  358.66   17.60
  -6   6   4  363.06   22.90
  -4  -6   4  465.25   37.70
  -4   6   4  453.15   25.50
  -2  -6   4   23.50   16.60
   2   6  -4   10.50    6.00
  -2   6   4    8.00   11.30
   0  -6   4 2681.93  129.79
   0   6  -4 3108.59  125.59
  -2  -6  -4  263.17   17.20
  -2   6  -4  271.97   17.00
  -4  -6  -4  792.82   38.30
  -4   6  -4  835.62   38.90
  -6  -6  -4 1025.50   46.60
  -6   6  -4  979.10   47.60
  -8  -6  -4  497.65   28.20
  -8   6  -4  502.05   29.80
 -10  -6  -4  724.03   37.00
 -10   6  -4  714.83   39.00
 -12  -6  -4  116.49   16.80
 -14  -6  -4  109.99   18.40
 -14   6  -4   76.49   17.40
 -16  -6  -4   58.69   20.10
 -16   6  -4   59.89   23.60
 -18  -6  -4   42.90   21.80
 -18   6  -4   56.09   24.90
 -20  -6  -4  255.17   29.30
 -20   6  -4  295.47   32.00
 -22  -6  -4  232.98   30.50
 -22   6  -4  198.48   33.80
 -24  -6  -4   -0.20   29.60
 -24   6  -4   70.69   34.40
 -25  -7   4   36.40   48.20
 -25  -7   4   55.89   32.50
 -25   7   4   59.79   32.20
 -23  -7   4   43.40   27.40
 -23  -7   4   21.50   42.10
 -23   7   4   48.30   33.00
 -21  -7   4   33.50   40.50
 -21  -7   4   34.80   23.70
 -21   7   4   20.70   26.90
 -19  -7   4   37.70   33.50
 -19  -7   4   11.40   21.50
 -19   7   4   13.00   23.80
 -17  -7   4   89.09   32.30
 -17  -7   4   83.39   19.20
 -17   7   4   61.49   22.70
 -15  -7   4  190.28   18.50
 -15  -7   4  177.68   32.60
 -15   7   4  177.68   22.80
 -13  -7   4   14.40   12.90
 -13  -7   4  -10.20   25.50
 -13   7   4    1.10   18.50
 -11  -7   4  164.38   27.30
 -11  -7   4  160.18   16.10
 -11   7   4  158.08   18.90
  -9  -7   4   28.50   23.80
  -9  -7   4   40.00    9.50
  -9   7   4   58.79   15.90
  -7  -7   4   56.99    8.10
  -7  -7   4   33.00   22.40
  -7   7   4   55.29   15.50
  -5  -7   4 1391.46   70.79
  -5  -7   4 1404.86   61.89
  -5   7   4 1461.75   64.59
  -3  -7   4  260.67   33.80
  -3   7   4  278.97   20.20
   3   7  -4  292.47   15.10
  -1  -7   4  388.66   32.20
  -1   7   4  340.07   22.60
   1   7  -4  383.36   19.40
  -1  -7  -4  273.27   15.80
  -1   7  -4  266.57   17.50
  -5  -7  -4  217.48   16.40
  -5   7  -4  169.88   16.90
  -7  -7  -4   43.60   12.50
  -7   7  -4   29.10   15.70
  -9  -7  -4  465.85   27.60
  -9   7  -4  458.55   29.40
 -11  -7  -4  178.98   18.10
 -11   7  -4  167.58   20.60
 -13   7  -4   31.40   19.80
 -15  -7  -4  292.97   27.40
 -15   7  -4  327.87   28.80
 -17  -7  -4  191.68   24.60
 -17   7  -4  209.68   23.50
 -19  -7  -4   40.90   24.00
 -19   7  -4    7.80   26.90
 -21  -7  -4   18.30   29.60
 -21   7  -4   18.30   29.80
 -23  -7  -4   44.50   30.20
 -23   7  -4   24.10   32.50
 -24  -8   4   77.69   46.80
 -24  -8   4  121.99   31.40
 -24   8   4  101.59   32.80
 -22  -8   4   47.10   41.60
 -22  -8   4   62.89   26.90
 -22   8   4   89.69   32.60
 -20  -8   4   23.40   22.90
 -20   8   4   22.80   25.90
 -18  -8   4   32.40   33.20
 -18  -8   4   37.20   25.40
 -18   8   4   16.50   23.50
 -16  -8   4   97.99   33.30
 -16  -8   4   82.19   18.10
 -16   8   4  102.59   22.30
 -14  -8   4 1173.48   72.89
 -14  -8   4 1175.08   54.19
 -14   8   4 1083.39   56.99
 -12  -8   4 2735.03  130.29
 -12  -8   4 2746.13  119.79
 -12   8   4 2710.23  121.79
 -10  -8   4  667.03   32.20
 -10  -8   4  651.93   50.59
 -10   8   4  623.34   35.90
  -8  -8   4 1928.31   85.49
  -8  -8   4 1978.90   96.99
  -8   8   4 1953.60   88.09
  -6  -8   4  164.68   11.90
  -6  -8   4  187.98   31.50
  -6   8   4  162.58   17.50
  -4  -8   4  283.37   36.70
   4   8  -4  287.57   16.40
  -4   8   4  287.27   21.60
  -2  -8   4  429.46   36.30
   2   8  -4  459.55   22.40
  -2   8   4  461.25   26.00
   0   8  -4   13.10    9.60
   0   8   4   14.30   13.20
  -4  -8  -4   45.10   11.50
  -4   8  -4   33.70   13.10
  -6  -8  -4  693.03   34.70
  -6   8  -4  696.73   36.60
  -8  -8  -4 1170.58   55.19
  -8   8  -4 1206.78   56.69
 -10  -8  -4  718.43   38.00
 -10   8  -4  765.82   40.30
 -12  -8  -4  186.98   19.10
 -12   8  -4  164.68   22.20
 -14  -8  -4   51.19   18.70
 -14   8  -4   48.00   21.90
 -16  -8  -4   33.20   20.90
 -16   8  -4    3.20   22.80
 -18  -8  -4  260.47   29.90
 -18   8  -4  235.78   29.70
 -20  -8  -4  406.36   35.80
 -20   8  -4  398.96   40.30
 -22  -8  -4  113.09   29.50
 -22   8  -4   96.39   32.40
 -24  -8  -4   31.70   36.40
 -24   8  -4   57.59   35.40
 -23  -9   4   24.30   29.10
 -23  -9   4  -20.20   45.00
 -23   9   4   24.30   30.50
 -21  -9   4   43.70   41.60
 -21  -9   4   42.20   25.30
 -21   9   4   57.79   27.60
 -19  -9   4    8.70   22.10
 -19  -9   4    0.90   38.10
 -19   9   4    2.00   28.60
 -17  -9   4   13.30   18.40
 -17  -9   4   26.00   32.60
 -17   9   4   15.30   23.60
 -15  -9   4  353.26   26.40
 -15  -9   4  367.76   50.19
 -15   9   4  331.57   31.50
 -13  -9   4   36.10   14.00
 -13  -9   4   29.40   27.30
 -13   9   4   23.00   19.50
 -11  -9   4   25.70   11.90
 -11  -9   4   24.50   26.50
 -11   9   4   42.80   18.10
  -9  -9   4   28.40   22.40
  -9  -9   4    4.70    9.50
  -9   9   4   -0.10   13.60
  -7  -9   4   71.69    8.80
  -7  -9   4   77.39   23.70
  -7   9   4   83.59   17.10
  -5  -9   4  209.98   38.90
  -5   9   4  146.79   17.80
  -3  -9   4  608.94   45.60
  -3   9   4  689.03   35.40
   3   9  -4  733.43   32.00
  -1   9   4  136.89   15.80
   1   9  -4  147.39   13.50
  -5  -9  -4  154.98   14.80
  -5   9  -4  146.79   16.90
  -7  -9  -4  198.78   17.10
  -7   9  -4  205.28   20.00
  -9  -9  -4   36.00   14.50
  -9   9  -4   25.80   17.60
 -11  -9  -4  325.77   24.80
 -13  -9  -4   62.79   17.80
 -13   9  -4   48.50   21.40
 -15  -9  -4  288.27   26.10
 -15   9  -4  328.37   29.20
 -17  -9  -4  161.28   24.20
 -17   9  -4  126.69   22.50
 -19  -9  -4   83.89   25.10
 -19   9  -4   65.59   28.70
 -21  -9  -4   -8.20   27.10
 -21   9  -4    3.00   30.00
 -23  -9  -4   50.19   31.60
 -23   9  -4   19.00   34.30
 -24 -10   4   48.10   32.10
 -24 -10   4  -56.39   50.59
 -24  10   4   95.49   37.80
 -22 -10   4   81.39   46.30
 -22 -10   4  125.09   27.70
 -22  10   4  119.79   31.70
 -20 -10   4  171.28   49.40
 -20 -10   4  188.48   26.00
 -20  10   4  131.09   29.50
 -18 -10   4  168.38   39.90
 -18  10   4  184.88   27.60
 -16 -10   4  848.42   69.79
 -16 -10   4  886.01   44.80
 -16  10   4  806.42   48.60
 -14 -10   4  993.40   48.60
 -14 -10   4 1035.60   68.19
 -14  10   4  987.40   52.69
 -12 -10   4  247.08   45.20
 -12 -10   4  251.37   19.40
 -12  10   4  236.48   23.50
 -10 -10   4  281.17   18.00
 -10 -10   4  279.07   44.40
 -10  10   4  292.17   25.90
  -8 -10   4  435.46   40.80
  -8 -10   4  369.56   20.90
  -8  10   4  369.96   27.90
  -6 -10   4  869.31   54.39
  -4  10   4  398.96   26.50
   4  10  -4  379.16   21.40
  -2 -10   4 1339.17   63.49
   2  10  -4 1076.89   52.29
  -2  10   4 1055.69   54.29
  -4 -10  -4  327.47   20.90
  -4  10  -4  294.47   22.60
  -6 -10  -4  765.22   37.80
  -6  10  -4  764.02   39.90
  -8 -10  -4  976.20   47.10
  -8  10  -4  923.71   47.80
 -10 -10  -4  972.40   46.80
 -10  10  -4  926.01   48.40
 -12 -10  -4  154.68   30.50
 -12  10  -4  191.38   22.90
 -14 -10  -4  105.49   22.70
 -14  10  -4  108.19   23.90
 -16 -10  -4  404.36   33.80
 -16  10  -4  469.85   36.90
 -18  10  -4  267.37   27.10
 -20 -10  -4  222.78   30.30
 -20  10  -4  244.88   33.20
 -22 -10  -4   95.49   31.00
 -22  10  -4  109.69   34.70
 -24 -10  -4   60.29   38.30
 -24  10  -4   37.10   36.30
 -23 -11   4    6.40   31.70
 -23  11   4   34.50   36.90
 -21 -11   4   32.20   26.50
 -21 -11   4  -34.70   44.00
 -21  11   4  108.89   30.30
 -19 -11   4  176.68   73.39
 -19 -11   4   82.29   23.90
 -19  11   4   58.49   28.20
 -17 -11   4  186.08   40.80
 -17 -11   4  225.38   23.10
 -17  11   4  224.68   29.00
 -15 -11   4  353.56   26.80
 -15 -11   4  371.36   53.99
 -15  11   4  371.16   33.20
 -13 -11   4  105.49   32.00
 -13 -11   4  113.29   15.20
 -13  11   4  105.69   22.40
 -11 -11   4  133.19   30.60
 -11 -11   4  137.29   14.10
 -11  11   4  139.99   21.40
  -9 -11   4   46.60   25.30
  -9 -11   4   26.40   10.40
  -9  11   4   27.20   18.00
  -7 -11   4  136.99   11.60
  -7  11   4  136.59   19.40
   5  11  -4    9.00   11.20
  -5  11   4   31.60   18.20
  -3 -11  -4    5.60   12.60
  -3  11  -4  -16.80   13.40
  -5  11  -4   81.59   16.40
  -7 -11  -4  139.89   17.10
  -7  11  -4  107.59   18.40
  -9 -11  -4   49.00   15.20
  -9  11  -4   53.49   18.80
 -11 -11  -4    9.70   15.90
 -11  11  -4   -4.60   19.30
 -13 -11  -4   70.49   18.80
 -13  11  -4   45.60   22.60
 -15 -11  -4  478.15   33.60
 -15  11  -4  454.05   37.30
 -17 -11  -4   13.40   22.70
 -17  11  -4   23.50   27.00
 -19 -11  -4   63.39   26.10
 -19  11  -4   78.69   29.70
 -21 -11  -4  -20.80   28.60
 -21  11  -4   28.10   31.70
 -23 -11  -4   48.00   32.70
 -23  11  -4   45.50   36.50
 -22 -12   4   56.09   28.50
 -22  12   4   81.89   31.70
 -20 -12   4  -44.70   44.40
 -20 -12   4  -11.40   25.00
 -20  12   4   12.20   29.50
 -18 -12   4   58.19   26.90
 -18 -12   4   14.40   67.59
 -18  12   4   52.39   28.20
 -16 -12   4  175.68   21.60
 -16 -12   4  128.59   37.70
 -16  12   4  154.48   30.20
 -14 -12   4  598.24   34.00
 -14 -12   4  564.54   63.39
 -14  12   4  566.14   39.20
 -12 -12   4  542.25   55.89
 -12 -12   4  559.84   29.40
 -12  12   4  536.25   36.00
 -10 -12   4  240.88   17.30
 -10 -12   4  225.48   41.40
 -10  12   4  246.78   24.90
  -8 -12   4   37.50   10.40
  -8 -12   4   95.99   30.50
  -8  12   4   31.50   18.80
  -2  12  -4    8.50   15.40
   2  12   4   21.80   16.50
  -4 -12  -4  669.83   33.90
  -4  12  -4  624.94   34.60
  -6 -12  -4 1479.55   68.39
  -6  12  -4 1527.65   69.59
  -8 -12  -4 1330.97   63.09
  -8  12  -4 1408.86   65.09
 -10 -12  -4  237.78   22.40
 -10  12  -4  231.18   24.00
 -12 -12  -4  109.69   20.60
 -12  12  -4   68.59   22.80
 -14 -12  -4   52.39   20.50
 -14  12  -4   25.80   23.70
 -16 -12  -4   22.40   22.80
 -16  12  -4   20.70   26.10
 -18 -12  -4  121.49   26.40
 -18  12  -4   91.69   29.80
 -20 -12  -4  225.28   33.90
 -20  12  -4  206.88   35.10
 -22 -12  -4  138.29   33.10
 -22  12  -4  178.98   36.30
 -23 -13   4   32.10   31.50
 -23  13   4  100.59   40.20
 -21 -13   4   41.10   29.50
 -21  13   4   31.00   31.70
 -19 -13   4  -83.79   43.30
 -19 -13   4   52.09   24.70
 -19  13   4   70.99   30.00
 -17 -13   4  301.97   29.60
 -17  13   4  339.27   33.00
 -15 -13   4  177.88   19.20
 -15 -13   4  130.39   39.50
 -15  13   4  193.08   27.50
 -13 -13   4  227.18   39.20
 -13 -13   4  247.98   21.20
 -13  13   4  302.57   26.80
 -11 -13   4   40.70   13.00
 -11 -13   4   41.60   28.90
 -11  13   4   50.69   21.80
  -9 -13   4   96.39   33.30
  -9 -13   4   72.49   12.10
  -9  13   4  119.69   26.70
   7  13  -4  189.78   18.70
  -7  13   4  167.28   21.40
  -3  13  -4   14.90   15.10
  -5  13  -4   67.79   16.70
  -7 -13  -4  182.78   17.20
  -7  13  -4  135.69   19.80
  -9 -13  -4    9.40   15.20
  -9  13  -4   -5.60   23.70
 -11 -13  -4   13.40   17.50
 -11  13  -4   -1.30   20.90
 -13 -13  -4   32.10   19.20
 -13  13  -4   15.30   23.40
 -15 -13  -4   67.69   25.00
 -15  13  -4   38.30   20.10
 -17 -13  -4   33.90   24.50
 -17  13  -4   21.10   27.10
 -19 -13  -4  105.79   28.80
 -19  13  -4   86.49   30.70
 -21 -13  -4    6.20   35.00
 -21  13  -4   44.70   34.50
 -23 -13  -4   26.60   37.80
 -23  13  -4   97.99   37.80
 -22 -14   4   84.29   30.30
 -22  14   4   60.49   35.10
 -20 -14   4  -13.80   25.50
 -20  14   4   -5.30   31.10
 -18 -14   4   24.50   23.20
 -18  14   4    2.30   29.20
 -16 -14   4  -84.19   48.50
 -16 -14   4   18.10   18.80
 -16  14   4   -0.50   25.80
 -14 -14   4   64.79   17.00
 -14 -14   4   14.20   38.00
 -14  14   4   72.49   25.40
 -12 -14   4   37.10   14.50
 -12 -14   4   28.00   31.40
 -12  14   4   32.90   23.40
 -10 -14   4  156.18   14.50
 -10 -14   4  128.39   36.00
 -10  14   4  130.59   22.90
  -8 -14   4  124.19   37.50
  -8  14   4   35.30   21.30
  -2  14  -4  115.89   18.00
   2  14   4   96.19   15.80
  -4  14  -4   -5.30   15.80
  -6 -14  -4  730.83   37.80
  -6  14  -4  738.83   39.80
  -8 -14  -4  232.78   21.90
  -8  14  -4  245.98   36.40
 -10  14  -4   32.00   21.10
 -12 -14  -4   -9.20   18.60
 -12  14  -4   -9.40   22.20
 -14 -14  -4   31.90   21.40
 -14  14  -4   28.10   25.70
 -16 -14  -4   45.80   23.40
 -16  14  -4   62.99   27.60
 -18 -14  -4   25.40   25.80
 -18  14  -4  -17.20   30.40
 -20 -14  -4   -1.20   29.50
 -20  14  -4   30.00   33.70
 -22 -14  -4  165.48   39.20
 -22  14  -4  132.59   38.40
 -21 -15   4   12.90   30.10
 -21  15   4   49.90   34.50
 -19 -15   4   25.40   25.20
 -19  15   4   16.60   31.70
 -17 -15   4   92.79   34.10
 -17 -15   4  -76.19   47.80
 -17  15   4  107.09   31.00
 -15 -15   4  -12.80   42.90
 -15 -15   4   30.20   17.40
 -15  15   4   16.90   26.40
 -13 -15   4  -10.90   56.49
 -13 -15   4    6.30   16.00
 -13  15   4   -4.90   24.40
 -11 -15   4   57.99   14.10
 -11 -15   4  112.29   41.80
 -11  15   4   50.09   23.10
  -9 -15   4  204.08   42.40
  -9  15   4  171.18   24.50
   7  15  -4  141.29   16.80
  -7  15   4  144.69   22.50
  -1  15  -4   25.40   17.10
   1  15   4    9.80   19.00
   3  15   4   10.80   17.60
  -3  15  -4   38.30   16.40
  -5  15  -4  103.09   18.00
  -7 -15  -4  253.87   21.70
  -7  15  -4  255.97   23.90
  -9  15  -4   61.89   21.00
 -11 -15  -4  -20.20   17.40
 -11  15  -4   -4.50   21.90
 -13 -15  -4   20.20   20.10
 -13  15  -4  -10.30   24.30
 -15 -15  -4   33.80   25.60
 -15  15  -4   40.50   26.20
 -17 -15  -4  162.98   27.10
 -17  15  -4  131.89   30.50
 -19 -15  -4   63.39   32.40
 -19  15  -4   30.80   31.70
 -21 -15  -4   50.29   31.40
 -21  15  -4   49.60   36.50
 -22 -16   4   -5.40   30.70
 -22  16   4    1.50   36.60
 -20 -16   4  -13.00   25.30
 -20  16   4   -1.70   33.60
 -18 -16   4   -6.00   22.50
 -18  16   4   13.60   31.10
 -16 -16   4    5.90   18.90
 -16  16   4   -2.90   29.00
 -14 -16   4  -19.80   46.10
 -14 -16   4  -18.60   17.50
 -14  16   4  -14.10   25.90
 -12 -16   4   34.60   56.99
 -12 -16   4   -9.40   15.10
 -12  16   4    3.30   25.10
 -10 -16   4  222.38   55.89
 -10  16   4  159.58   21.30
  -8  16   4   38.30   22.00
   8  16  -4   25.80   16.30
   6  16  -4   53.09   15.80
  -6  16   4   36.00   20.70
   0  16  -4  183.18   19.40
   0  16   4  172.58   22.40
   2  16   4   55.59   19.70
  -2  16  -4   47.10   18.50
   4  16   4   18.00   18.50
  -4  16  -4   -5.70   17.30
  -6  16  -4  122.89   20.20
  -8 -16  -4   -2.20   27.90
  -8  16  -4   -7.60   19.80
 -10 -16  -4   30.60   17.90
 -10  16  -4   -2.50   22.30
 -12 -16  -4  110.49   21.20
 -12  16  -4   84.09   25.10
 -14 -16  -4   67.59   22.20
 -14  16  -4   48.70   27.60
 -16 -16  -4    1.30   24.40
 -16  16  -4    7.70   28.00
 -18 -16  -4   92.69   31.90
 -18  16  -4   50.59   32.30
 -20 -16  -4  -11.60   35.00
 -20  16  -4    3.90   35.10
 -22 -16  -4  -21.40   35.00
 -22  16  -4   42.50   39.30
 -21 -17   4   40.30   31.10
 -21  17   4   30.80   36.30
 -19 -17   4   12.30   24.70
 -19  17   4   25.10   33.70
 -17 -17   4    4.50   23.70
 -17  17   4   11.90   30.70
 -15 -17   4   -3.90   18.50
 -15 -17   4  -68.79   52.59
 -15  17   4   -4.90   27.80
 -13 -17   4   75.29   49.50
 -13 -17   4   26.80   17.60
 -13  17   4   10.60   25.90
 -11 -17   4  445.46   73.69
 -11  17   4  291.47   31.70
  -9 -17   4  236.68   50.09
  -9  17   4  134.69   21.50
   9  17  -4  123.79   19.10
  -7 -17   4  342.17   79.49
  -7  17   4  129.39   24.60
   7  17  -4  166.38   18.40
  -5 -17   4  231.18   69.59
   5  17  -4   42.70   16.30
  -5  17   4   35.20   21.90
   1  17  -4  143.39   19.00
  -1  17   4  152.38   20.00
   1  17   4  155.18   22.20
  -1  17  -4  173.28   19.00
   3  17   4  295.67   28.00
  -3  17  -4  265.27   25.00
  -5  17  -4   43.50   19.00
   5  17   4   17.80   23.70
  -7 -17  -4   29.80   17.60
  -7  17  -4   36.10   20.40
  -9 -17  -4  142.29   19.70
  -9  17  -4  140.19   24.60
 -11 -17  -4   37.90   19.40
 -11  17  -4   16.30   24.60
 -13 -17  -4   64.19   22.00
 -13  17  -4   21.80   26.90
 -15 -17  -4   14.20   26.40
 -15  17  -4   26.20   28.20
 -17 -17  -4   42.50   30.20
 -17  17  -4   24.40   31.50
 -19 -17  -4  -13.70   29.90
 -19  17  -4   -6.60   35.00
 -21 -17  -4   45.20   33.80
 -21  17  -4   31.30   37.90
 -20 -18   4   14.80   27.90
 -20  18   4   11.80   37.20
 -18 -18   4   12.90   24.80
 -18  18   4    2.20   34.00
 -16  18   4   -1.30   31.20
 -14 -18   4   -1.30   18.80
 -14 -18   4  -45.10   57.89
 -14  18   4  -24.30   28.50
 -12 -18   4  142.79   57.29
 -12  18   4   25.40   27.50
  10  18  -4  181.28   21.00
 -10  18   4  201.18   29.00
  -8 -18   4  254.87   57.59
  -8  18   4   39.30   24.20
   8  18  -4   38.80   18.40
   0  18  -4   16.00   16.60
   0  18   4   19.40   22.10
  -2  18  -4   13.50   17.40
   4  18   4   95.59   22.80
  -4  18  -4   66.49   19.50
  -6  18  -4   17.70   20.10
  -8 -18  -4   90.99   19.30
  -8  18  -4   89.69   23.70
 -10 -18  -4   -5.90   21.50
 -10  18  -4  -10.70   23.80
 -12 -18  -4    4.70   21.10
 -12  18  -4  -30.10   26.40
 -14 -18  -4   29.50   23.40
 -14  18  -4   -7.60   28.20
 -16 -18  -4   82.39   29.70
 -16  18  -4   65.69   31.40
 -18 -18  -4   37.90   29.40
 -18  18  -4   35.10   32.80
 -20 -18  -4  -18.00   32.00
 -20  18  -4    3.20   36.90
 -19 -19   4   -3.10   26.10
 -19  19   4   20.20   36.30
 -17 -19   4   63.39   24.30
 -17  19   4   49.50   34.00
 -15 -19   4   27.10   20.50
 -15 -19   4  -99.19   66.09
 -15  19   4   51.39   30.10
 -13 -19   4  161.28   65.09
 -13  19   4   83.39   30.70
 -11  19   4   44.40   27.80
  11  19  -4   29.50   20.00
  -9 -19   4  199.08   55.69
  -9  19   4   -2.60   26.20
   9  19  -4  -12.30   19.70
  -1  19   4   97.49   23.30
   1  19  -4   78.79   18.20
  -1  19  -4    8.00   18.00
   1  19   4  -13.30   21.50
  -3  19  -4  263.87   24.30
   3  19   4  309.77   29.60
   5  19   4  175.68   24.30
  -5  19  -4  139.39   23.20
  -7  19  -4  164.08   23.90
  -9 -19  -4  105.29   20.60
  -9  19  -4   76.49   25.20
 -11 -19  -4   98.39   22.10
 -11  19  -4   85.19   26.10
 -13 -19  -4   53.29   22.60
 -13  19  -4   16.70   29.20
 -15 -19  -4   -4.60   25.40
 -15  19  -4   16.70   30.60
 -17 -19  -4   60.89   29.30
 -17  19  -4   73.39   33.50
 -19 -19  -4   -9.80   35.80
 -19  19  -4   12.80   34.30
 -20 -20   4  -22.60   29.00
 -20  20   4   33.90   40.60
 -18 -20   4   13.50   26.40
 -18  20   4   21.10   36.80
 -16  20   4   68.79   34.10
 -14  20   4  -15.80   32.00
  12  20  -4  127.29   22.80
 -12  20   4   92.89   30.40
 -10  20   4   56.39   29.10
  -2  20   4    7.10   25.00
   2  20  -4   69.29   20.80
   0  20  -4   63.39   21.70
   0  20   4   78.79   27.60
   2  20   4   87.09   23.90
  -2  20  -4   59.69   23.80
   4  20   4   67.09   23.40
  -4  20  -4   10.20   23.80
   6  20   4  171.38   25.80
  -6  20  -4  174.38   25.30
  -8  20  -4   25.60   24.00
 -10 -20  -4  258.37   25.60
 -10  20  -4  232.08   30.80
 -12 -20  -4   74.49   26.10
 -12  20  -4    8.00   27.10
 -14 -20  -4    2.20   28.60
 -14  20  -4    2.50   30.30
 -16 -20  -4   22.10   27.70
 -16  20  -4   11.70   33.00
 -18 -20  -4    5.00   35.20
 -18  20  -4   29.80   35.70
 -19 -21   4  -31.70   29.70
 -19  21   4    5.90   39.50
 -17  21   4    5.00   36.50
 -15  21   4   46.20   34.00
 -13 -21   4 -103.69   77.69
  13  21  -4   46.80   23.70
 -13  21   4   24.10   31.20
 -11 -21   4  208.98   75.79
 -11  21   4   52.89   31.90
  11  21  -4   23.80   22.80
  -9  21   4   30.30   27.80
  -3  21   4   12.00   26.60
   3  21  -4   -0.90   21.40
   1  21  -4   22.00   19.50
  -1  21   4   54.29   26.20
  -1  21  -4   -3.70   34.80
   1  21   4   -6.30   24.30
   3  21   4   25.80   27.40
  -3  21  -4   28.50   22.10
   5  21   4  201.78   27.20
  -5  21  -4  166.38   25.40
   7  21   4   13.70   23.80
  -7  21  -4    9.90   24.60
  -9  21  -4   67.19   26.60
 -11 -21  -4   88.89   23.30
 -11  21  -4  100.69   33.00
 -13 -21  -4   29.60   25.90
 -13  21  -4   31.70   31.30
 -15 -21  -4   32.00   31.60
 -15  21  -4   82.09   33.10
 -17 -21  -4   46.90   34.80
 -17  21  -4   57.99   35.80
 -19 -21  -4   21.40   34.00
 -19  21  -4  112.79   43.40
 -18  22   4   38.40   38.10
 -16  22   4   20.10   37.50
  14  22  -4  120.49   25.70
 -14  22   4   66.59   27.90
 -12 -22   4   24.20   81.69
 -12  22   4  154.78   35.00
  12  22  -4  175.48   26.70
 -10 -22   4  252.67   81.39
  10  22  -4    7.80   21.90
 -10  22   4   -1.60   29.90
   8  22  -4  313.87   28.90
  -8  22   4  317.27   35.60
   4  22  -4  208.78   25.60
  -4  22   4  220.58   32.00
   2  22  -4  246.78   26.70
  -2  22   4  230.68   31.20
   0  22   4   58.09   26.90
   0  22  -4   58.29   26.30
  -2  22  -4   40.00   22.20
   2  22   4   21.40   25.10
  -4  22  -4   21.00   26.60
   4  22   4   16.70   28.70
  -6  22  -4  207.28   27.30
   6  22   4  197.38   28.10
   8  22   4   60.59   29.00
  -8  22  -4   56.79   26.60
 -10  22  -4   30.40   27.70
 -12  22  -4   15.40   30.10
 -14 -22  -4   23.00   27.70
 -14  22  -4   -8.90   32.40
 -16 -22  -4    2.10   33.60
 -16  22  -4   34.10   35.20
 -18 -22  -4   16.80   37.10
 -18  22  -4  132.49   38.90
 -17  23   4   40.00   39.70
  17  23  -4    8.00   31.30
 -15  23   4   22.40   35.30
  15  23  -4   63.09   27.80
 -13  23   4   25.00   35.70
  13  23  -4   63.99   26.50
 -11 -23   4   68.89   78.29
 -11  23   4   18.70   33.70
  -9  23   4  101.59   32.10
   9  23  -4   64.29   23.50
  -7  23   4   -3.20   31.00
   7  23  -4   18.80   23.30
   5  23  -4   34.50   24.20
  -5  23   4   63.79   30.20
  -3  23   4   59.29   30.00
   1  23  -4   85.09   23.10
  -1  23   4  106.79   30.10
   1  23   4  297.27   32.80
  -1  23  -4  299.77   30.40
  -3  23  -4   66.39   24.90
   3  23   4  107.19   28.00
  -5  23  -4   62.29   29.30
   5  23   4  112.19   27.10
  -7  23  -4   35.20   30.10
   7  23   4   23.70   27.10
  -9  23  -4   15.30   28.90
   9  23   4   35.10   27.20
 -11  23  -4   47.60   30.00
 -13  23  -4   25.50   33.20
 -15 -23  -4   90.29   33.90
 -15  23  -4   93.99   35.10
 -17 -23  -4  159.58   38.90
 -17  23  -4  191.98   39.10
 -16  24   4   38.30   39.40
  16  24  -4  -20.50   30.90
  14  24  -4   26.70   27.60
 -14  24   4   13.10   37.30
  12  24  -4   45.50   27.10
 -12  24   4   39.30   35.10
 -10 -24   4   55.99   84.49
 -10  24   4  -22.20   34.70
  10  24  -4   31.10   25.50
   8  24  -4   12.60   41.10
  -8  24   4   10.00   26.00
   6  24  -4   39.50   30.00
  -6  24   4   53.19   32.40
  -4  24   4  227.98   34.50
   4  24  -4  229.18   28.70
   2  24  -4  286.07   28.40
  -2  24   4  343.97   35.30
   0  24  -4  151.58   28.60
   0  24   4  165.28   30.80
   2  24   4  312.97   33.90
  -2  24  -4  259.87   29.50
   4  24   4  183.88   29.60
  -4  24  -4  178.08   32.00
   6  24   4   13.70   28.10
  -6  24  -4  -50.09   30.50
   8  24   4   81.29   29.80
  -8  24  -4   43.70   29.20
 -10  24  -4   -0.60   31.20
  10  24   4   26.10   32.10
 -12  24  -4   17.30   32.60
 -14  24  -4   61.09   40.70
 -16 -24  -4  -33.30   36.20
 -16  24  -4   22.80   37.00
  15  25  -4   63.89   31.60
 -15  25   4   84.29   42.50
  13  25  -4    7.20   26.50
 -13  25   4   29.70   37.70
  11  25  -4  -30.80   26.30
 -11  25   4  -19.10   37.00
  -9  25   4   39.50   36.90
   9  25  -4    1.90   26.20
   7  25  -4   25.70   25.70
  -7  25   4   13.60   33.20
  -5  25   4  135.89   34.30
   5  25  -4  146.99   28.00
  -3  25   4   -1.40   31.60
   3  25  -4   35.40   28.00
   1  25  -4  108.29   26.10
  -1  25   4  124.59   33.40
   1  25   4   -6.90   30.40
  -1  25  -4   63.99   29.60
  -3  25  -4   43.20   30.00
   3  25   4   97.39   31.10
   5  25   4   38.40   27.80
  -5  25  -4    0.00   31.40
  -7  25  -4   44.50   28.80
   7  25   4   24.30   33.00
   9  25   4  194.48   32.70
  -9  25  -4  221.38   34.60
  11  25   4   83.59   35.80
 -11  25  -4  135.69   34.50
 -13  25  -4    9.40   34.90
 -15  25  -4   -1.80   38.50
 -14  26   4    4.20   39.00
  14  26  -4   32.00   31.70
 -12  26   4   34.90   39.60
  12  26  -4  -20.30   27.60
  10  26  -4   17.20   27.40
 -10  26   4  -28.00   37.90
  -8  26   4   31.90   36.90
   8  26  -4   26.20   28.30
   6  26  -4   50.69   28.10
  -6  26   4   39.50   35.70
  -4  26   4  146.89   39.60
   4  26  -4  187.98   30.00
  -2  26   4  350.06   39.30
   2  26  -4  376.16   35.90
   0  26   4  448.86   41.00
   0  26  -4  415.36   37.30
   2  26   4   25.40   31.00
  -2  26  -4   34.90   27.80
   4  26   4  118.09   32.10
  -4  26  -4   20.30   29.20
  -6  26  -4  167.28   36.00
   6  26   4  177.78   33.00
  -8  26  -4   60.49   31.90
   8  26   4   90.99   35.60
 -10  26  -4   86.79   33.80
  10  26   4   31.80   32.50
 -12  26  -4   80.99   37.40
  12  26   4   66.89   32.50
  14  26   4   10.00   37.70
 -14  26  -4   28.60   38.90
 -13  27   4   10.40   41.70
  13  27  -4   56.49   30.80
  11  27  -4   22.70   31.00
 -11  27   4   15.80   40.70
   9  27  -4    9.40   31.00
  -9  27   4   13.10   38.00
  -7  27   4  -17.50   36.20
   7  27  -4   36.00   31.50
  -5  27   4   13.50   35.70
   5  27  -4    8.80   29.70
  -3  27   4  -20.20   34.90
   3  27  -4   27.50   30.00
   1  27  -4   52.89   32.00
  -1  27   4   15.50   35.30
  -1  27  -4  -24.80   31.20
   1  27   4  -18.40   31.90
   3  27   4   -3.20   36.60
  -3  27  -4    4.00   29.70
   5  27   4   12.90   37.40
  -5  27  -4   34.20   31.20
   7  27   4   51.69   31.40
  -7  27  -4   65.09   36.80
  -9  27  -4   53.59   35.00
   9  27   4    5.70   36.80
 -11  27  -4   42.50   36.40
  11  27   4   16.30   32.60
  13  27   4   -2.30   38.60
 -13  27  -4   37.30   38.90
  12  28  -4   58.09   33.70
 -12  28   4   19.30   43.10
  10  28  -4   45.30   31.30
 -10  28   4   44.80   42.90
  -8  28   4  126.49   42.10
   8  28  -4   97.39   32.50
  -6  28   4   91.19   40.30
   6  28  -4  112.29   32.60
   4  28  -4  307.07   35.60
  -4  28   4  309.27   41.60
   2  28  -4  430.36   40.60
  -2  28   4  439.76   45.10
   0  28   4  361.96   40.20
   0  28  -4  311.67   35.10
   2  28   4  148.69   35.50
  -2  28  -4  143.19   35.80
  -4  28  -4   61.89   35.90
   4  28   4   34.90   35.20
  -6  28  -4  122.89   34.00
   6  28   4   91.79   34.80
   8  28   4  302.77   41.90
  -8  28  -4  306.57   39.10
  10  28   4  115.59   39.10
 -10  28  -4  135.39   42.00
 -12  28  -4   65.19   39.40
  12  28   4   48.00   40.40
 -11  29   4   34.60   46.10
  11  29  -4    6.00   32.70
  -9  29   4  -30.10   41.90
   9  29  -4    8.10   34.90
  -7  29   4   -9.80   40.80
   7  29  -4  -11.20   32.90
  -5  29   4   11.00   44.90
   5  29  -4    7.60   32.10
   3  29  -4   30.50   29.70
  -3  29   4   36.50   37.30
   1  29  -4   15.00   33.80
  -1  29   4   22.90   37.50
   1  29   4   26.40   36.70
  -1  29  -4   42.30   35.30
  -3  29  -4   76.79   34.10
   3  29   4   93.69   37.10
  -5  29  -4   78.79   39.70
   5  29   4   22.40   35.50
  -7  29  -4   -7.80   34.80
   7  29   4    2.80   35.10
   9  29   4   26.20   39.10
  -9  29  -4   32.60   38.20
  11  29   4   22.70   40.40
 -11  29  -4   44.30   40.30
  10  30  -4   29.70   37.20
 -10  30   4   39.40   50.09
  -8  30   4   11.40   43.90
   8  30  -4   -1.70   33.30
   6  30  -4  101.99   35.30
  -6  30   4   46.50   43.70
   4  30  -4   65.09   34.00
  -4  30   4   66.49   42.90
   2  30  -4  188.78   38.10
  -2  30   4  253.67   46.60
   0  30  -4    3.70   31.70
   0  30   4   61.79   39.00
   2  30   4   43.10   39.20
  -2  30  -4   33.80   38.70
   4  30   4   14.10   37.20
  -4  30  -4   25.90   35.70
   6  30   4   30.90   37.20
  -6  30  -4   88.09   41.20
   8  30   4   55.19   41.20
  -8  30  -4   84.39   43.10
  10  30   4  190.48   43.30
 -10  30  -4  222.38   42.60
   7  31  -4   -9.80   35.30
  -7  31   4   28.80   51.39
  -5  31   4   75.99   45.70
   5  31  -4   92.49   37.70
  -3  31   4   23.50   42.60
   3  31  -4   26.00   37.00
  -1  31   4   78.49   46.90
   1  31  -4   24.50   36.50
  -1  31  -4   21.80   38.50
   1  31   4   21.10   41.40
  -3  31  -4   23.50   35.70
   3  31   4   62.89   39.40
  -5  31  -4   10.80   38.60
   5  31   4    5.70   39.70
   7  31   4  -34.40   37.90
  -7  31  -4   31.00   39.00
  -4  32   4   60.49   45.10
   4  32  -4   -8.40   36.90
  -2  32   4  191.38   45.60
   0  32  -4   17.70   40.60
   0  32   4   14.90   48.80
  -2  32  -4    2.90   40.50
   2  32   4   42.40   41.70
  -4  32  -4   55.39   39.70
   4  32   4  -29.20   40.70
 -24   0   5   43.50   29.10
 -22   0   5  105.49   26.60
 -20   0   5   25.00   22.80
 -18   0   5    3.10   19.70
 -16   0   5  -14.70   17.80
 -14   0   5   -3.90   13.80
 -12   0   5    3.40   12.60
 -10   0   5  -14.90   12.30
  -4   0   5  -19.20    7.10
  -2   0   5   12.10    5.80
   0   0  -5   -7.10    6.40
  -2   0  -5   23.30    7.70
   2   0   5   -4.80   11.20
  -4   0  -5    1.10    9.60
   4   0   5    9.10    8.50
  -8   0  -5    0.30   12.80
 -10   0  -5   40.50   15.80
 -12   0  -5    2.30   15.90
 -14   0  -5   -4.60   17.90
 -16   0  -5  -21.30   19.50
 -18   0  -5   -6.40   22.40
 -20   0  -5    1.30   25.80
 -22   0  -5   54.39   29.10
 -24   0  -5   -2.70   32.60
 -25  -1   5   20.40   43.20
 -25  -1   5   34.20   30.80
 -25   1   5   30.30   31.00
 -23  -1   5   41.90   24.50
 -23   1   5   22.10   24.70
 -21  -1   5  -10.40   24.00
 -21   1   5    7.00   21.70
 -19  -1   5    6.50   18.90
 -19   1   5    1.50   19.20
 -15  -1   5   58.09   14.90
 -15   1   5   51.29   15.90
 -13  -1   5   69.89   14.90
 -13   1   5   79.69   16.40
 -11  -1   5  171.08   16.10
 -11   1   5  179.08   17.30
  -9  -1   5   13.80   10.60
  -9   1   5   16.40   11.20
  -7  -1   5  219.78   15.40
  -7   1   5  206.78   14.70
  -5  -1   5  382.46   18.70
  -5   1   5  366.16   20.00
  -3  -1   5 2406.56  104.89
  -3   1   5 2443.46  105.29
   1  -1  -5 1647.14   72.59
   1   1  -5 1684.73   72.39
   1  -1   5  550.24   32.20
  -1  -1  -5  543.55   25.50
  -1   1  -5  532.55   25.60
  -3  -1  -5 1315.57   58.09
   3  -1   5 1175.28   59.99
   3   1   5 1377.06   59.69
  -3   1  -5 1359.66   58.09
  -5  -1  -5   19.90   10.60
  -5   1  -5    5.40   10.90
  -7  -1  -5  105.09   11.50
  -7   1  -5  105.59   13.80
  -9  -1  -5  158.18   16.90
  -9   1  -5  150.68   17.10
 -11  -1  -5  194.78   19.10
 -11   1  -5  189.58   19.40
 -13  -1  -5    3.10   21.20
 -13   1  -5    6.40   17.70
 -15  -1  -5    6.80   18.00
 -15   1  -5   14.10   19.70
 -17  -1  -5   36.10   22.00
 -17   1  -5    6.20   21.80
 -19  -1  -5   58.59   20.20
 -19  -1  -5   17.10   24.30
 -19   1  -5   55.39   24.40
 -21  -1  -5   36.40   31.10
 -21   1  -5  -18.70   27.60
 -23  -1  -5  -18.40   30.60
 -23   1  -5  -29.40   29.40
 -25  -1  -5   -9.70   37.10
 -25   1  -5   75.49   35.00
 -24  -2   5   -2.70   28.60
 -24  -2   5   59.69   42.60
 -24   2   5   40.90   30.90
 -22  -2   5   68.49   25.50
 -22   2   5   72.99   27.70
 -20  -2   5  132.59   23.60
 -20   2   5  116.19   22.50
 -18  -2   5   20.60   19.60
 -18   2   5    9.40   19.00
 -16  -2   5  145.39   18.70
 -14  -2   5   67.79   15.10
 -14   2   5   74.99   16.00
 -12  -2   5   62.89   13.50
 -12   2   5   75.39   14.60
 -10  -2   5   67.99   12.50
 -10   2   5   82.79   13.50
  -8  -2   5  173.48   14.50
  -8   2   5  129.79   13.40
  -6  -2   5 1806.42   80.09
  -6   2   5 1873.71   81.19
  -4  -2   5    4.40    4.90
  -4   2   5   37.30    9.30
  -2  -2   5 3389.96  147.09
   2   2  -5 3238.28  141.99
  -2   2   5 3254.47  142.79
   0  -2   5  926.11   48.30
   0  -2  -5  923.61   41.60
   0   2  -5  938.21   41.10
  -4  -2  -5   97.39   11.00
  -4   2  -5   83.89   11.40
  -8  -2  -5  643.64   34.00
  -8   2  -5  670.33   34.40
 -10  -2  -5   11.20   14.30
 -10   2  -5   13.60   15.50
 -12  -2  -5  223.18   20.50
 -12   2  -5  212.88   21.10
 -14  -2  -5   14.30   18.00
 -14  -2  -5   30.40   11.10
 -14   2  -5   -3.00   18.90
 -16  -2  -5   16.40   14.00
 -16  -2  -5  -14.70   20.30
 -16   2  -5   20.10   21.00
 -18  -2  -5  -12.70   16.90
 -18  -2  -5   -4.90   22.80
 -18   2  -5  -15.40   23.50
 -20  -2  -5   63.09   26.00
 -20   2  -5   63.49   26.60
 -22  -2  -5   64.79   29.30
 -22   2  -5   34.00   29.70
 -24  -2  -5   10.10   31.10
 -24   2  -5   11.30   33.00
 -25  -3   5   43.70   44.10
 -25  -3   5   31.30   27.80
 -25   3   5   -9.90   29.00
 -23  -3   5   24.40   38.80
 -23  -3   5   25.50   27.20
 -23   3   5   20.90   25.50
 -21  -3   5   54.19   24.20
 -21  -3   5   36.40   37.80
 -21   3   5   38.20   23.50
 -19  -3   5   78.89   21.70
 -19   3   5   98.59   24.60
 -17  -3   5  -10.50   17.70
 -17   3   5   -1.60   21.10
 -15  -3   5  120.29   17.20
 -15   3   5  140.39   20.80
 -13  -3   5  296.17   22.60
 -13   3   5  348.77   23.70
 -11  -3   5  412.76   24.60
 -11   3   5  417.06   25.70
  -9  -3   5  455.05   24.00
  -9   3   5  437.16   25.70
  -7  -3   5   89.59    8.90
  -7   3   5  106.29   12.50
  -5  -3   5    0.60   17.80
  -5  -3   5   12.90    5.10
  -5   3   5   36.00    9.80
  -3  -3   5   -9.80   17.00
  -3   3   5   16.80    8.90
  -1  -3   5  716.13   41.40
   1   3  -5  764.42   32.70
   1  -3   5  319.97   24.60
  -1  -3  -5  324.27   17.60
  -1   3  -5  319.87   16.30
  -5  -3  -5  407.66   22.30
  -5   3  -5  387.16   22.60
  -7  -3  -5  336.07   21.50
  -7   3  -5  334.17   22.20
  -9   3  -5   56.99   12.70
 -11  -3  -5  600.94   32.70
 -11   3  -5  554.04   33.20
 -13  -3  -5   35.70   20.40
 -13   3  -5   33.10   18.60
 -15  -3  -5  187.38   22.10
 -15   3  -5  216.08   20.80
 -17  -3  -5   56.59   21.60
 -17   3  -5   50.49   23.30
 -19  -3  -5  155.18   25.10
 -19   3  -5  139.09   27.50
 -21  -3  -5   36.40   26.70
 -21   3  -5   79.59   28.10
 -23  -3  -5   45.50   29.90
 -23   3  -5   55.99   35.50
 -24  -4   5   -3.50   28.70
 -24  -4   5   32.30   42.30
 -24   4   5   19.90   27.60
 -22  -4   5   45.90   25.80
 -22  -4   5   51.69   39.40
 -22   4   5   86.69   29.20
 -20  -4   5  225.78   25.70
 -20  -4   5  221.68   40.10
 -20   4   5  250.17   26.20
 -18  -4   5   63.09   32.70
 -18  -4   5   71.59   24.60
 -18   4   5   70.29   24.50
 -16  -4   5   87.39   17.20
 -16  -4   5   82.09   29.40
 -16   4   5   81.09   21.40
 -14  -4   5  146.19   16.10
 -14  -4   5  123.29   28.30
 -14   4   5  129.59   18.10
 -12  -4   5  150.48   14.00
 -12  -4   5  100.89   24.60
 -12   4   5  151.18   17.00
 -10  -4   5  117.59   11.80
 -10  -4   5   81.09   26.00
 -10   4   5  111.09   15.70
  -8  -4   5  733.03   47.50
  -8  -4   5  744.43   34.30
  -8   4   5  742.33   38.00
  -6  -4   5  761.22   47.30
  -6  -4   5  837.72   35.30
  -6   4   5  759.12   37.60
  -4  -4   5 6605.34  287.77
  -4   4   5 6507.35  283.27
  -2  -4   5  334.77   30.50
  -2   4   5  355.26   19.70
   0  -4  -5  948.41   42.80
   0  -4   5  904.71   49.00
   0   4  -5  988.90   42.10
  -4  -4  -5  355.06   19.90
  -4   4  -5  313.87   20.10
  -6  -4  -5  199.28   16.90
  -6   4  -5  175.98   15.90
  -8  -4  -5   49.70   13.70
  -8   4  -5   70.09   15.40
 -10  -4  -5   27.90   14.80
 -10   4  -5   33.80   16.50
 -12  -4  -5   20.10   15.40
 -12   4  -5   11.50   27.50
 -14  -4  -5   95.89   18.90
 -14   4  -5   77.39   19.90
 -16  -4  -5   15.40   20.40
 -16   4  -5   -8.40   21.80
 -18  -4  -5   19.10   22.40
 -18   4  -5   11.30   24.30
 -20  -4  -5   37.10   25.30
 -20   4  -5   57.39   28.10
 -22  -4  -5   21.60   27.60
 -22   4  -5   14.20   30.10
 -24  -4  -5   40.70   30.80
 -24   4  -5   42.50   34.60
 -25  -5   5   14.80   31.40
 -25  -5   5    6.20   45.00
 -25   5   5   27.20   30.00
 -23  -5   5   26.50   39.60
 -23  -5   5  105.09   27.50
 -23   5   5   43.80   30.50
 -21  -5   5    3.40   21.40
 -21  -5   5   15.90   34.90
 -21   5   5   26.70   24.70
 -19  -5   5   43.60   57.79
 -19  -5   5   52.89   21.90
 -19   5   5   75.49   26.00
 -17  -5   5  -10.60   17.70
 -17  -5   5   10.10   30.30
 -17   5   5    0.50   22.60
 -15  -5   5    7.70   28.50
 -15  -5   5  -15.90   14.70
 -15   5   5    3.50   18.10
 -13  -5   5  484.75   26.70
 -13  -5   5  459.05   46.60
 -13   5   5  424.96   29.20
 -11  -5   5   81.99   27.10
 -11  -5   5  107.19   12.90
 -11   5   5  106.89   16.60
  -9  -5   5  136.19   13.60
  -9  -5   5  120.19   24.10
  -9   5   5  153.78   18.10
  -7  -5   5   22.60    7.00
  -7  -5   5   14.60   22.40
  -7   5   5   73.79   13.50
  -5  -5   5  264.17   12.80
  -5  -5   5  275.77   31.40
  -5   5   5  278.67   21.00
  -3  -5   5 3302.87  150.38
  -3   5   5 3385.66  145.59
  -1  -5   5  511.55   37.00
  -1   5   5  581.94   29.10
   1   5  -5  632.74   26.60
  -1  -5  -5  150.48   13.10
  -1   5  -5  112.99   10.50
  -3  -5  -5  508.85   24.90
  -3   5  -5  450.25   24.90
  -5  -5  -5 1077.09   51.59
  -5   5  -5 1183.18   52.29
  -7  -5  -5  393.36   24.30
  -7   5  -5  390.26   25.50
  -9  -5  -5  340.57   23.70
  -9   5  -5  347.37   25.50
 -11  -5  -5   96.29   15.90
 -11   5  -5   89.99   17.90
 -13  -5  -5   88.79   18.60
 -13   5  -5  102.59   16.60
 -15  -5  -5  221.68   22.70
 -15   5  -5  246.18   23.50
 -17  -5  -5   74.29   21.90
 -17   5  -5  111.09   20.30
 -19  -5  -5  272.07   32.00
 -19   5  -5  342.77   32.00
 -21  -5  -5   90.29   27.40
 -21   5  -5   96.49   30.10
 -23  -5  -5   29.40   30.00
 -23   5  -5   28.20   32.10
 -24  -6   5   41.30   43.60
 -24  -6   5   27.90   28.20
 -24   6   5   13.70   29.40
 -22  -6   5   51.69   38.20
 -22  -6   5   60.69   26.10
 -22   6   5   44.60   26.60
 -20  -6   5   34.00   22.40
 -20  -6   5   36.00   35.20
 -20   6   5   65.69   27.70
 -18  -6   5   15.30   32.60
 -18  -6   5   -2.70   22.40
 -18   6   5   25.50   21.70
 -16  -6   5   24.80   17.10
 -16  -6   5   20.00   30.60
 -16   6   5   10.80   19.10
 -14  -6   5   -4.30   14.30
 -14  -6   5  -11.10   26.50
 -12  -6   5   -0.50   25.80
 -12  -6   5    6.30   12.60
 -12   6   5   16.60   16.20
 -10  -6   5   19.70    9.70
 -10  -6   5   40.90   25.10
 -10   6   5   16.60   15.20
  -8  -6   5   44.60    8.40
  -8  -6   5   38.50   24.30
  -8   6   5   53.39   15.00
  -6  -6   5 2029.00   95.69
  -6  -6   5 1976.60   86.29
  -6   6   5 1968.20   88.39
  -4  -6   5  324.37   33.10
  -4   6   5  329.97   21.90
   4   6  -5  377.26   16.30
  -2  -6   5   97.19   18.90
  -2   6   5  110.19   13.10
   2   6  -5  101.79    8.60
   0  -6   5 2016.80  107.29
   0   6  -5 2690.33  102.59
  -2  -6  -5  255.77   17.10
  -2   6  -5  255.07   17.80
  -6  -6  -5    4.90   11.60
  -6   6  -5  -13.30   13.50
  -8  -6  -5 1255.97   59.39
  -8   6  -5 1318.57   60.59
 -10  -6  -5  177.18   17.80
 -10   6  -5  190.98   20.00
 -12  -6  -5  551.74   31.60
 -12   6  -5  510.95   33.60
 -14  -6  -5   27.20   17.60
 -14   6  -5    0.20   19.50
 -16  -6  -5   47.80   20.70
 -16   6  -5   14.20   22.10
 -18  -6  -5   39.00   23.00
 -18   6  -5   62.79   25.70
 -20  -6  -5   31.10   25.00
 -20   6  -5    5.40   28.50
 -22  -6  -5   74.79   32.50
 -22   6  -5   41.00   31.70
 -24  -6  -5   58.39   31.90
 -24   6  -5   52.99   35.00
 -25  -7   5  -15.70   46.00
 -25  -7   5    8.20   31.50
 -25   7   5   -1.90   31.80
 -23  -7   5   19.20   25.80
 -23  -7   5   -3.90   41.90
 -23   7   5   22.60   32.20
 -21  -7   5   -3.40   24.00
 -21  -7   5    2.80   39.10
 -21   7   5    0.10   26.60
 -19  -7   5   22.60   38.70
 -19  -7   5   51.19   20.90
 -19   7   5   43.60   24.30
 -17  -7   5   51.29   18.70
 -17  -7   5   55.09   32.50
 -17   7   5   68.29   22.10
 -15  -7   5  159.28   18.00
 -15  -7   5  181.18   31.90
 -15   7   5  148.99   22.20
 -13  -7   5   50.59   13.30
 -13  -7   5   35.30   26.30
 -13   7   5   13.40   18.60
 -11  -7   5    4.20   23.10
 -11  -7   5    9.20   11.10
 -11   7   5   -3.70   16.30
  -9  -7   5   35.70    9.00
  -9  -7   5   12.30   22.10
  -9   7   5   23.30   15.90
  -7  -7   5    9.90   21.40
  -7  -7   5   11.00    6.70
  -7   7   5    5.90   15.10
  -5  -7   5  634.54   43.60
  -5   7   5  649.93   33.20
  -3  -7   5  713.53   46.50
   3   7  -5  816.02   34.40
  -3   7   5  775.02   36.50
  -1  -7   5  425.76   38.80
   1   7  -5  476.95   22.40
  -1   7   5  431.96   25.50
  -1  -7  -5  149.49   14.80
  -1   7  -5  153.68   14.10
  -3  -7  -5  151.78   12.60
  -3   7  -5  148.29   13.80
  -5   7  -5   36.80   13.30
  -7  -7  -5 1072.89   50.89
  -7   7  -5 1100.89   52.09
  -9  -7  -5  214.98   21.10
  -9   7  -5  238.28   21.20
 -11  -7  -5   12.90   15.30
 -11   7  -5   18.70   18.60
 -13  -7  -5  -15.30   16.80
 -13   7  -5   -0.40   19.10
 -15  -7  -5   64.19   22.50
 -15   7  -5   49.10   22.70
 -17  -7  -5    1.60   22.00
 -17   7  -5    3.70   24.00
 -19  -7  -5  289.77   29.60
 -19   7  -5  314.57   32.40
 -21  -7  -5  154.08   29.20
 -21   7  -5  144.09   31.80
 -23  -7  -5  -13.30   29.80
 -23   7  -5   26.70   34.10
 -24  -8   5  -33.80   52.09
 -24  -8   5   14.00   29.80
 -24   8   5   64.09   31.80
 -22  -8   5   -8.90   25.90
 -22  -8   5   -1.30   42.40
 -22   8   5   25.10   28.20
 -20  -8   5   40.10   39.70
 -20  -8   5   51.99   23.30
 -20   8   5   53.79   29.50
 -18  -8   5   22.90   19.20
 -18   8   5   18.30   26.70
 -16  -8   5  190.18   19.60
 -16  -8   5  151.28   34.60
 -16   8   5  162.68   25.10
 -14  -8   5   62.49   14.60
 -14  -8   5   60.19   30.20
 -14   8   5   63.39   20.40
 -12  -8   5    1.90   11.60
 -12  -8   5    5.20   26.40
 -12   8   5   19.30   17.40
 -10  -8   5   22.10   25.20
 -10  -8   5   34.70   10.00
 -10   8   5   16.90   17.00
  -8  -8   5  129.69   27.30
  -8  -8   5  159.38   12.20
  -8   8   5  145.49   18.20
  -6  -8   5  500.35   23.30
  -6  -8   5  500.95   41.50
  -6   8   5  498.95   29.60
  -4  -8   5 1084.29   65.09
   4   8  -5 1240.98   51.69
  -4   8   5 1172.68   54.69
  -2  -8   5   33.90   19.90
   2   8  -5   23.50    7.50
  -2   8   5   29.20   13.50
   0  -8   5 1786.62   97.59
   0   8   5 2184.68   92.49
   0   8  -5 2280.07   91.29
  -2  -8  -5  284.07   19.20
  -2   8  -5  280.97   19.80
  -6  -8  -5  624.14   31.90
  -6   8  -5  596.14   33.10
  -8  -8  -5   91.19   15.20
  -8   8  -5   96.99   17.70
 -10  -8  -5  161.98   17.90
 -10   8  -5  174.08   20.70
 -12   8  -5  207.08   22.70
 -14  -8  -5   -1.10   18.40
 -14   8  -5  -26.20   21.60
 -16  -8  -5  -25.30   20.20
 -16   8  -5   15.90   22.80
 -18  -8  -5   31.40   23.90
 -18   8  -5   33.20   27.20
 -20  -8  -5   46.10   26.50
 -20   8  -5   21.30   28.90
 -22  -8  -5   94.49   34.60
 -22   8  -5  127.39   32.80
 -24  -8  -5  102.59   34.30
 -24   8  -5   87.39   37.40
 -23  -9   5  114.09   29.10
 -23  -9   5   58.09   45.10
 -23   9   5   77.09   31.60
 -21  -9   5   38.70   42.70
 -21  -9   5   82.99   27.70
 -21   9   5   34.10   28.20
 -19  -9   5  223.38   24.70
 -19  -9   5  202.38   40.80
 -19   9   5  160.98   27.90
 -17  -9   5   15.30   36.20
 -17  -9   5   27.60   19.80
 -17   9   5   27.00   23.70
 -15  -9   5  300.57   24.30
 -15  -9   5  323.17   55.99
 -15   9   5  294.77   27.40
 -13  -9   5   26.60   29.90
 -13  -9   5   67.99   14.20
 -13   9   5   49.30   20.00
 -11  -9   5   17.00   10.50
 -11  -9   5   -3.10   26.80
 -11   9   5    8.60   17.90
  -9  -9   5   25.90    8.70
  -9  -9   5   19.40   23.40
  -9   9   5    7.00   17.10
  -7  -9   5   57.99   23.60
  -7  -9   5   17.40    7.30
  -7   9   5   27.60   16.80
  -5  -9   5   63.69   23.60
   5   9  -5   26.80    8.70
  -5   9   5   51.79   16.50
  -3  -9   5  194.78   33.90
   3   9  -5  110.09   10.10
  -3   9   5  102.09   13.60
  -1  -9   5  596.24   43.70
   1   9  -5  574.54   27.90
  -1   9   5  561.04   31.30
  -5  -9  -5  813.52   37.90
  -5   9  -5  785.22   40.30
  -7  -9  -5 1534.85   70.49
  -7   9  -5 1561.34   71.39
  -9  -9  -5  605.24   33.40
  -9   9  -5  615.34   35.60
 -11  -9  -5  291.97   24.30
 -11   9  -5  290.67   26.70
 -13  -9  -5  226.08   22.40
 -13   9  -5  230.18   25.40
 -15  -9  -5   35.90   20.90
 -15   9  -5   42.90   23.10
 -17  -9  -5  143.09   24.10
 -17   9  -5  106.19   26.80
 -19  -9  -5  398.66   36.90
 -19   9  -5  405.86   40.00
 -21  -9  -5   92.29   29.10
 -21   9  -5   68.79   32.40
 -23  -9  -5   -6.50   30.40
 -23   9  -5   -0.50   38.60
 -24 -10   5   -3.50   31.00
 -24 -10   5  -56.59   50.49
 -24  10   5   47.20   38.20
 -22 -10   5   36.20   26.90
 -22 -10   5    3.00   45.30
 -22  10   5   60.69   29.80
 -20 -10   5   26.20   41.20
 -20 -10   5   19.20   25.10
 -20  10   5   -4.80   27.70
 -18 -10   5  443.26   32.30
 -18 -10   5  413.76   60.79
 -18  10   5  346.07   36.20
 -16 -10   5  382.26   27.60
 -16 -10   5  338.57   54.79
 -16  10   5  352.86   33.30
 -14 -10   5   42.50   32.60
 -14 -10   5   42.70   15.50
 -14  10   5   67.49   22.00
 -12 -10   5   24.00   29.50
 -12 -10   5   20.60   12.40
 -12  10   5    3.30   18.90
 -10 -10   5  289.67   19.00
 -10 -10   5  306.87   46.50
 -10  10   5  304.47   25.80
  -8 -10   5  889.51   41.30
  -8 -10   5  914.81   57.59
  -8  10   5  937.41   46.40
  -6  10   5   49.90   17.60
   6  10  -5   74.99   10.30
   4  10  -5   10.50    9.40
  -4  10   5   21.40   16.90
  -2  10   5   57.89   15.80
   2  10  -5   11.60   10.00
   0  10   5  642.04   32.60
   0  10  -5  624.14   32.10
  -2 -10  -5  706.33   35.20
  -2  10  -5  702.33   35.80
  -4 -10  -5   28.70   12.60
  -4  10  -5  -14.70   13.70
  -6 -10  -5   98.49   14.60
  -6  10  -5   63.39   16.60
  -8 -10  -5  186.98   17.50
  -8  10  -5  192.88   20.20
 -10 -10  -5  431.06   27.90
 -10  10  -5  400.76   40.10
 -12 -10  -5   53.79   17.90
 -12  10  -5   47.90   21.20
 -14 -10  -5   24.70   19.90
 -14  10  -5   14.80   22.90
 -16 -10  -5   31.00   22.20
 -16  10  -5   24.30   24.30
 -18 -10  -5   19.80   24.70
 -18  10  -5   38.80   27.30
 -20 -10  -5   76.59   31.20
 -20  10  -5   56.19   30.80
 -22 -10  -5   38.60   35.50
 -22  10  -5   26.30   33.80
 -23 -11   5  187.48   31.40
 -23 -11   5  114.89   52.09
 -23  11   5  185.18   38.90
 -21 -11   5  280.87   29.40
 -21 -11   5  200.58   49.90
 -21  11   5  315.77   33.90
 -19 -11   5  254.97   45.80
 -19 -11   5  332.97   30.90
 -19  11   5  300.67   31.70
 -17 -11   5  443.76   72.79
 -17 -11   5  450.75   33.60
 -17  11   5  458.05   37.30
 -15 -11   5   79.19   36.10
 -15 -11   5  104.19   17.60
 -15  11   5   96.79   24.00
 -13 -11   5   32.20   32.50
 -13 -11   5   15.20   13.60
 -13  11   5   11.30   20.20
 -11 -11   5    4.60   30.10
 -11 -11   5   21.40   11.10
 -11  11   5    9.90   19.20
  -9 -11   5   46.70   28.60
  -9 -11   5    5.00    9.30
  -9  11   5   -0.90   18.20
  -7 -11   5  132.49   27.50
  -7  11   5   89.69   19.20
  -5 -11   5 2825.72  122.09
  -5  11   5 2306.07  110.79
   5  11  -5 2337.57  108.39
  -3  11   5  517.55   29.10
   3  11  -5  519.45   26.70
   1  11  -5 1393.36   63.79
  -1  11   5 1444.66   65.99
  -1  11  -5 1391.56   64.09
   1  11   5 1461.25   65.09
  -3 -11  -5 1765.22   79.99
  -3  11  -5 1796.12   80.49
  -5 -11  -5 1032.10   48.80
  -5  11  -5 1013.60   49.40
  -7 -11  -5  160.38   17.00
  -7  11  -5  170.58   20.10
  -9 -11  -5  769.02   41.00
  -9  11  -5  842.52   43.00
 -11 -11  -5  -11.10   20.10
 -11  11  -5    1.80   20.10
 -13 -11  -5   52.29   19.00
 -13  11  -5   23.00   22.50
 -15 -11  -5  162.48   23.70
 -15  11  -5  152.88   26.90
 -17 -11  -5 1047.30   57.99
 -17  11  -5  971.80   57.19
 -19 -11  -5  207.58   28.80
 -21 -11  -5  239.48   36.20
 -21  11  -5  184.78   35.60
 -23 -11  -5  205.08   39.60
 -23  11  -5  201.68   39.20
 -22 -12   5   69.59   49.70
 -22 -12   5  143.09   28.60
 -22  12   5  145.69   32.70
 -20 -12   5  256.97   27.10
 -20 -12   5  161.08   48.40
 -20  12   5  218.98   31.90
 -18 -12   5  511.15   36.30
 -18 -12   5  515.85   66.79
 -18  12   5  466.95   45.70
 -16 -12   5  631.34   37.70
 -16 -12   5  654.93   79.39
 -16  12   5  612.24   43.00
 -14 -12   5  379.56   26.20
 -14 -12   5  353.36   56.09
 -14  12   5  374.56   33.50
 -12 -12   5    4.50   12.00
 -12 -12   5    1.30   28.40
 -12  12   5   -6.80   20.20
 -10 -12   5   73.29   11.10
 -10 -12   5   57.29   31.40
 -10  12   5   59.29   19.80
  -8 -12   5  302.87   42.80
  -8  12   5  197.48   22.80
  -6  12   5  761.52   41.10
   6  12  -5  756.32   36.60
  -4 -12  -5  332.77   22.40
  -4  12  -5  258.47   25.80
  -6 -12  -5  227.98   20.60
  -6  12  -5  198.48   20.20
  -8 -12  -5  408.96   26.70
  -8  12  -5  432.86   29.90
 -10 -12  -5  445.46   39.70
 -10  12  -5  474.55   32.80
 -12 -12  -5   40.70   18.00
 -12  12  -5   33.70   21.90
 -14 -12  -5   17.70   20.80
 -14  12  -5   11.50   23.30
 -16 -12  -5   50.39   26.70
 -16  12  -5   53.99   28.00
 -18 -12  -5   95.59   29.60
 -18  12  -5   85.69   29.70
 -20 -12  -5   41.10   28.40
 -20  12  -5   34.30   31.40
 -22 -12  -5   24.60   35.90
 -22  12  -5   11.00   35.80
 -23 -13   5  126.39   34.00
 -23  13   5  167.28   40.50
 -21 -13   5   50.89   48.20
 -21 -13   5  184.08   28.00
 -21  13   5  175.78   33.50
 -19 -13   5  246.58   48.60
 -19 -13   5  322.97   27.80
 -19  13   5  309.47   34.40
 -17 -13   5  137.89   20.30
 -17 -13   5   63.69   41.50
 -17  13   5  108.39   28.00
 -15 -13   5   40.20   46.60
 -15 -13   5   66.29   16.50
 -15  13   5   58.99   25.50
 -13 -13   5   94.09   36.90
 -13 -13   5  135.99   15.50
 -13  13   5  134.39   23.90
 -11 -13   5  191.68   17.20
 -11 -13   5  156.18   35.10
 -11  13   5  212.18   24.90
  -9 -13   5  243.38   45.30
  -9  13   5  259.37   25.10
  -7 -13   5  608.14   57.99
  -7  13   5  447.76   33.20
   7  13  -5  486.45   27.40
  -5 -13   5 2903.71  139.09
  -5  13   5 2903.91  130.39
   5  13  -5 2978.30  127.99
  -3 -13   5 3657.43  153.18
  -3  13   5 3078.49  144.99
   3  13  -5 3102.29  142.99
  -3  13  -5  157.78   16.80
  -5 -13  -5  663.23   34.00
  -5  13  -5  607.24   35.00
  -7 -13  -5 1714.93   79.59
  -7  13  -5 1797.52   80.79
  -9 -13  -5  365.86   26.00
  -9  13  -5  326.37   29.30
 -11 -13  -5  212.48   21.80
 -11  13  -5  234.28   25.40
 -13 -13  -5  164.18   22.70
 -13  13  -5  171.88   25.40
 -15 -13  -5  136.49   23.60
 -15  13  -5  105.99   25.40
 -17 -13  -5  872.11   49.30
 -17  13  -5  768.82   51.89
 -19 -13  -5  925.41   55.49
 -19  13  -5  965.90   58.99
 -21 -13  -5  355.16   37.10
 -21  13  -5  303.87   40.10
 -22 -14   5  180.18   30.50
 -22  14   5  151.98   35.90
 -20 -14   5  228.08   29.00
 -20  14   5  262.97   35.00
 -18 -14   5  162.58   49.99
 -18 -14   5  320.67   30.10
 -18  14   5  289.67   32.70
 -16 -14   5  288.47   47.10
 -16 -14   5  397.36   27.30
 -16  14   5  359.36   33.50
 -14 -14   5  110.29   42.90
 -14 -14   5  160.18   17.50
 -14  14   5  182.48   26.10
 -12 -14   5   -8.10   13.20
 -12 -14   5  -37.40   37.20
 -12  14   5   -7.50   23.30
 -10 -14   5    9.50   11.40
 -10 -14   5   22.90   35.30
 -10  14   5   17.50   17.40
  -8 -14   5  114.29   32.10
  -8  14   5   72.89   21.20
   8  14  -5  109.39   14.10
  -6  14   5   96.39   17.30
   6  14  -5  159.98   14.60
   4  14  -5  366.06   24.70
  -4  14   5  439.76   30.30
  -2  14   5 1024.00   49.20
   2  14  -5 1000.50   48.20
  -4  14  -5   71.19   16.20
  -6 -14  -5  216.08   19.50
  -6  14  -5  244.48   21.50
  -8 -14  -5  305.77   24.70
 -10 -14  -5  300.57   25.50
 -10  14  -5  288.97   26.60
 -12 -14  -5  526.15   34.60
 -12  14  -5  519.15   37.70
 -14 -14  -5  103.19   23.00
 -14  14  -5   92.39   26.80
 -16 -14  -5   65.99   24.40
 -16  14  -5   68.39   27.80
 -18 -14  -5    4.00   27.10
 -18  14  -5   21.40   30.10
 -20 -14  -5    8.40   30.70
 -20  14  -5   80.59   33.20
 -22 -14  -5  -16.60   33.30
 -22  14  -5  -35.00   36.90
 -21 -15   5   91.19   29.90
 -21  15   5  120.09   35.30
 -19 -15   5  149.29   24.20
 -19  15   5  178.28   34.90
 -17 -15   5    3.30   45.40
 -17 -15   5  123.09   21.10
 -17  15   5  140.69   30.30
 -15 -15   5  302.67   26.20
 -15  15   5  245.88   31.30
 -13 -15   5  151.78   42.30
 -13 -15   5  184.98   17.80
 -13  15   5  185.18   27.10
 -11 -15   5   48.30   13.60
 -11  15   5   44.60   24.40
  -9 -15   5  303.87   51.59
   9  15  -5  251.27   21.70
  -9  15   5  257.07   26.80
  -7  15   5  126.29   22.50
   7  15  -5  160.08   16.50
  -5 -15   5 1117.89   70.99
   5  15  -5 1079.09   50.69
  -5  15   5 1003.80   57.69
  -3  15   5 1648.54   75.79
   3  15  -5 1570.84   72.49
  -1  15   5 1092.49   53.89
   1  15  -5 1051.49   50.69
  -1  15  -5  645.74   34.30
   1  15   5  669.83   38.10
  -3  15  -5  655.73   35.10
   3  15   5  623.64   37.00
  -5 -15  -5  474.65   28.80
  -5  15  -5  452.75   30.20
  -7 -15  -5 1230.78   61.09
  -7  15  -5 1253.57   60.59
  -9 -15  -5  751.32   40.40
  -9  15  -5  746.93   42.90
 -11 -15  -5   54.39   20.00
 -11  15  -5   57.49   24.00
 -13 -15  -5   85.69   22.30
 -13  15  -5   37.20   25.00
 -15 -15  -5  182.78   28.30
 -15  15  -5  208.08   29.70
 -17 -15  -5  209.48   29.90
 -17  15  -5  226.28   32.30
 -19 -15  -5  387.76   36.30
 -19  15  -5  432.86   40.90
 -21 -15  -5  353.66   39.00
 -21  15  -5  365.46   42.40
 -22 -16   5  -23.80   29.60
 -22  16   5   32.40   37.60
 -20 -16   5   34.10   26.30
 -20  16   5   94.49   35.20
 -18  16   5   25.90   31.70
 -16 -16   5  -76.99   47.90
 -16 -16   5    6.20   19.60
 -16  16   5   43.90   28.90
 -14 -16   5  -50.79   43.90
 -14 -16   5   -6.90   16.60
 -14  16   5   10.70   26.60
 -12 -16   5   36.00   39.30
 -12 -16   5    8.60   14.80
 -12  16   5    2.30   25.40
 -10 -16   5   74.89   44.90
  10  16  -5    8.60   15.50
 -10  16   5    5.00   23.40
  -8  16   5   88.99   23.60
   8  16  -5   93.79   15.90
  -6 -16   5  561.34   79.19
   6  16  -5  424.46   26.70
  -6  16   5  423.16   33.50
  -4 -16   5 1043.90   76.59
  -4  16   5  705.43   63.59
   4  16  -5  912.81   44.50
  -2  16   5  256.37   25.00
   2  16  -5  224.08   21.80
   2  16   5  110.79   21.30
  -2  16  -5  131.69   19.20
  -4  16  -5    8.90   16.50
   4  16   5   19.90   19.50
  -8 -16  -5  162.08   19.40
  -8  16  -5  149.49   22.20
 -10 -16  -5  260.77   26.60
 -10  16  -5  268.67   27.30
 -12 -16  -5   68.89   21.70
 -12  16  -5   68.49   25.20
 -14 -16  -5   -1.00   22.50
 -14  16  -5   26.60   27.60
 -16 -16  -5  106.59   26.90
 -16  16  -5   91.99   31.20
 -18 -16  -5   20.50   32.20
 -18  16  -5   20.60   31.40
 -20 -16  -5   13.00   36.40
 -20  16  -5   51.29   35.60
 -21 -17   5   18.70   29.40
 -21  17   5   46.20   41.50
 -19 -17   5   69.29   25.60
 -19  17   5   77.89   33.90
 -17 -17   5  390.46   32.40
 -17  17   5  409.46   38.40
 -15 -17   5  256.87   56.89
 -15 -17   5  356.66   26.20
 -15  17   5  355.76   35.80
 -13 -17   5  520.95   31.60
 -13 -17   5  541.65   80.69
 -13  17   5  519.25   41.70
 -11 -17   5  111.79   45.50
 -11  17   5   36.50   25.80
  -9  17   5  163.78   26.80
   9  17  -5  179.98   18.90
  -7 -17   5  108.69   44.40
  -7  17   5   25.00   23.30
   7  17  -5   15.10   16.20
  -5  17   5  152.78   24.00
   5  17  -5  123.59   17.00
  -3 -17   5  667.13   66.29
   3  17  -5  499.65   31.30
  -3  17   5  473.45   36.40
  -1  17  -5   19.30   15.40
  -3  17  -5   84.09   20.30
  -5  17  -5  359.46   27.80
  -7 -17  -5 1117.99   54.99
  -7  17  -5 1136.69   56.39
  -9 -17  -5  951.50   49.10
  -9  17  -5  958.70   54.29
 -11 -17  -5   75.29   21.50
 -11  17  -5  106.09   25.70
 -13 -17  -5   31.90   22.20
 -13  17  -5   51.39   26.40
 -15 -17  -5  161.18   26.60
 -15  17  -5  172.18   30.80
 -17 -17  -5  389.26   37.40
 -17  17  -5  368.76   37.30
 -19 -17  -5  303.77   36.00
 -19  17  -5  288.77   38.70
 -21 -17  -5  180.68   36.50
 -21  17  -5  198.28   40.50
 -20 -18   5   17.00   28.20
 -20  18   5   30.70   37.90
 -18 -18   5    8.00   22.20
 -18  18   5   20.60   34.70
 -16 -18   5   38.80   20.50
 -16  18   5   74.39   31.20
 -14 -18   5  -46.10   56.49
 -14  18   5    4.50   29.10
 -12 -18   5  111.59   56.99
 -12  18   5   50.29   28.20
 -10 -18   5  135.09   50.29
  10  18  -5   10.90   17.90
 -10  18   5    3.80   26.20
  -8  18   5   70.49   25.40
   8  18  -5   86.69   17.90
   6  18  -5  529.55   30.90
  -6  18   5  481.15   37.80
  -4 -18   5  713.73   64.99
   4  18  -5  521.45   33.20
  -4  18   5  499.05   39.00
   0  18   5  152.98   23.90
   0  18  -5  123.09   19.90
   2  18   5  147.59   22.90
  -2  18  -5  141.99   21.20
   4  18   5   23.40   20.80
  -4  18  -5   40.40   18.40
  -6  18  -5    8.50   20.10
  -8 -18  -5  -20.10   19.30
  -8  18  -5   -9.30   21.60
 -10 -18  -5   -4.50   20.40
 -10  18  -5  -18.80   23.30
 -12 -18  -5   33.50   24.90
 -12  18  -5   43.80   27.20
 -14 -18  -5   57.39   24.40
 -14  18  -5   63.09   29.30
 -16 -18  -5   68.99   31.40
 -16  18  -5   86.09   31.80
 -18 -18  -5   -4.80   30.10
 -18  18  -5   13.10   33.80
 -20 -18  -5   -5.10   37.30
 -20  18  -5   16.50   36.30
 -19 -19   5  316.57   30.90
 -19  19   5  277.17   40.70
 -17  19   5  267.57   37.80
 -15 -19   5  151.68   69.69
 -15  19   5  279.57   35.40
 -13 -19   5  425.96   70.39
 -13  19   5  339.17   35.70
 -11 -19   5  204.08   63.79
 -11  19   5   31.60   28.00
  11  19  -5   61.79   20.30
  -9  19   5    7.80   25.60
  -7  19   5   94.99   26.60
   7  19  -5  140.49   18.90
   5  19  -5  323.37   27.20
  -5  19   5  366.86   31.70
  -3  19   5  660.13   41.50
   3  19  -5  565.54   35.80
  -1  19   5   44.50   23.60
   1  19  -5   50.69   19.00
  -1  19  -5   69.49   20.70
   1  19   5   72.29   23.50
  -3  19  -5  183.48   24.40
   3  19   5  188.18   25.20
   5  19   5    1.80   22.10
  -5  19  -5  -16.70   19.90
  -7  19  -5  268.07   26.40
  -9 -19  -5  540.45   35.30
  -9  19  -5  487.95   38.50
 -11 -19  -5  301.77   30.50
 -11  19  -5  334.77   31.70
 -13 -19  -5  159.88   25.90
 -13  19  -5  174.28   31.30
 -15 -19  -5  187.48   28.90
 -15  19  -5  217.18   34.70
 -17 -19  -5  287.07   34.30
 -17  19  -5  331.37   39.40
 -19 -19  -5  276.97   40.10
 -19  19  -5  217.58   40.80
 -20 -20   5   26.60   30.50
 -20  20   5   14.30   40.30
 -18 -20   5  -21.00   25.10
 -18  20   5   27.40   38.40
 -16  20   5   66.79   34.20
 -14 -20   5  -84.29   68.19
 -14  20   5  122.39   31.50
  14  20  -5   89.09   22.40
 -12 -20   5   25.30   65.69
  12  20  -5   31.30   21.20
 -12  20   5  -15.90   29.70
  10  20  -5   23.70   19.80
 -10  20   5   38.00   28.70
  -4  20   5  655.13   45.20
   4  20  -5  702.73   41.20
  -2  20   5  331.97   30.70
   2  20  -5  284.17   28.70
   0  20   5  -20.60   24.70
   0  20  -5  -12.70   20.50
  -2  20  -5   46.60   19.00
   2  20   5   10.20   23.00
   4  20   5   45.60   24.30
  -4  20  -5   30.70   23.70
  -6  20  -5  -34.50   21.70
   6  20   5    0.10   23.80
  -8  20  -5    4.60   23.90
 -10 -20  -5   38.80   22.30
 -10  20  -5   12.40   25.90
 -12 -20  -5  390.06   34.30
 -12  20  -5  369.86   35.80
 -14 -20  -5  143.99   27.70
 -14  20  -5  103.99   32.40
 -16 -20  -5  201.98   31.50
 -16  20  -5  229.88   37.30
 -18 -20  -5   99.69   33.20
 -18  20  -5   98.99   37.70
 -19  21   5  304.17   43.70
 -17  21   5  441.56   43.90
 -15  21   5  397.36   40.00
  15  21  -5  337.97   34.00
 -13 -21   5  195.68   81.09
 -13  21   5  483.85   44.70
  13  21  -5  354.86   33.40
 -11 -21   5  308.07   78.09
  11  21  -5  211.78   25.20
 -11  21   5  211.08   27.90
  -9 -21   5  297.87   74.59
  -9  21   5   22.20   28.50
   9  21  -5  -12.10   21.30
  -5  21   5  869.91   53.09
   5  21  -5  908.01   49.10
   3  21  -5  388.86   31.70
  -3  21   5  400.86   38.30
   1  21  -5   60.89   22.00
  -1  21   5  105.49   27.50
  -1  21  -5   -5.60   22.90
   1  21   5   17.90   25.30
  -3  21  -5   82.69   22.30
   3  21   5   43.40   25.70
   5  21   5   34.30   25.90
  -5  21  -5   44.70   24.90
   7  21   5  373.16   35.10
  -7  21  -5  359.56   34.30
  -9  21  -5  555.74   41.50
 -11 -21  -5  830.42   50.89
 -11  21  -5  808.92   51.09
 -13 -21  -5  292.07   33.70
 -13  21  -5  281.67   35.70
 -15 -21  -5  253.67   32.30
 -15  21  -5  255.57   36.90
 -17 -21  -5  350.26   37.30
 -17  21  -5  299.57   42.00
 -19 -21  -5  308.37   44.70
 -19  21  -5  242.58   42.90
 -18  22   5   42.50   39.70
 -16  22   5   99.69   37.70
  16  22  -5  108.19   27.50
 -14  22   5   70.69   35.10
  14  22  -5   70.49   25.10
 -12 -22   5 -131.49   81.99
  12  22  -5   39.40   23.50
 -12  22   5   65.79   33.60
 -10 -22   5  279.57   81.69
 -10  22   5   74.49   32.20
  10  22  -5   72.39   24.00
   6  22  -5  262.77   27.20
  -6  22   5  291.17   33.60
  -4  22   5  370.36   35.20
   4  22  -5  350.16   32.40
  -2  22   5  165.68   29.70
   2  22  -5  148.79   23.20
   0  22  -5  -32.30   31.80
   0  22   5   -2.80   27.60
   2  22   5   89.69   27.60
  -2  22  -5   52.09   24.60
  -4  22  -5    8.10   22.90
   4  22   5   20.40   26.70
   6  22   5  -11.70   29.60
  -6  22  -5   22.80   24.10
  -8  22  -5  -30.00   26.40
   8  22   5  -30.20   29.50
 -10  22  -5  -18.60   31.50
 -12 -22  -5   75.29   26.50
 -12  22  -5   97.99   31.50
 -14 -22  -5  119.99   29.20
 -14  22  -5  144.09   34.90
 -16 -22  -5  105.39   32.40
 -18 -22  -5   36.10   39.20
 -18  22  -5   52.19   40.20
  17  23  -5  233.98   31.00
 -17  23   5  221.18   43.00
 -15  23   5  456.65   46.10
  13  23  -5  301.47   30.20
 -13  23   5  311.07   40.50
 -11 -23   5   72.89   76.59
  11  23  -5  115.19   23.90
 -11  23   5   81.49   33.90
  -9 -23   5  411.66   79.89
  -9  23   5  262.87   37.30
   9  23  -5  212.88   26.50
  -7  23   5  376.96   38.50
   7  23  -5  376.16   33.60
  -5  23   5  460.05   43.40
   5  23  -5  508.55   39.20
   3  23  -5  479.85   36.70
  -3  23   5  512.75   43.20
  -1  23   5  358.86   34.90
   1  23  -5  328.17   31.60
  -1  23  -5  513.25   40.40
   1  23   5  538.05   42.70
   3  23   5  449.16   39.70
  -3  23  -5  439.56   35.80
   5  23   5  215.58   30.80
  -5  23  -5  230.58   28.90
  -7  23  -5  450.05   39.40
   7  23   5  519.55   41.20
   9  23   5  603.14   44.60
  -9  23  -5  659.43   46.10
 -11  23  -5  128.09   31.90
 -13  23  -5  235.38   36.70
 -15 -23  -5  306.27   36.10
 -15  23  -5  301.57   40.30
 -17 -23  -5  448.06   41.90
 -17  23  -5  419.16   45.20
  16  24  -5  121.59   30.70
 -16  24   5  137.59   42.90
  14  24  -5  -13.50   26.40
 -14  24   5   33.10   38.90
 -12  24   5   98.29   37.80
 -10 -24   5  -36.00   82.99
  10  24  -5   -9.50   26.10
 -10  24   5  -53.99   32.80
  -8  24   5  227.08   37.30
   8  24  -5  204.78   26.80
   6  24  -5  123.69   26.80
  -6  24   5  107.79   32.90
  -4  24   5  322.37   36.70
  -2  24   5   90.89   32.60
   2  24  -5  112.29   26.00
   0  24   5   63.29   30.20
   0  24  -5   52.59   26.30
  -2  24  -5  165.48   27.20
   2  24   5  217.38   31.90
   4  24   5   85.49   30.10
  -4  24  -5   75.89   26.40
  -6  24  -5  177.98   29.10
   6  24   5  209.88   31.70
   8  24   5  102.89   30.70
  -8  24  -5  117.69   33.60
  10  24   5    6.60   33.10
 -10  24  -5   72.89   31.80
 -12  24  -5  -19.80   32.10
 -14  24  -5  101.89   36.20
 -16 -24  -5   86.59   35.00
 -16  24  -5  106.19   38.20
 -15  25   5  290.97   45.40
  15  25  -5  293.57   32.20
  13  25  -5  106.79   28.20
 -13  25   5  117.09   41.20
 -11  25   5    6.80   36.70
  11  25  -5   12.10   27.70
  -9  25   5   42.30   35.90
   9  25  -5   79.09   41.80
  -7  25   5  102.49   36.30
   5  25  -5  765.22   49.80
  -5  25   5  765.12   54.49
  -3  25   5  922.61   58.79
   3  25  -5  885.71   52.79
   1  25  -5 1072.59   57.59
  -1  25   5 1129.39   63.69
   1  25   5  614.64   48.50
  -1  25  -5  611.14   41.70
  -3  25  -5  143.39   27.60
   3  25   5  105.59   31.40
   5  25   5  182.18   35.60
  -5  25  -5  155.38   29.90
  -7  25  -5  138.89   33.80
   7  25   5  123.29   35.50
  -9  25  -5  274.27   35.50
   9  25   5  303.17   35.70
  11  25   5   95.59   31.90
 -11  25  -5   62.29   33.90
 -13  25  -5   49.10   40.00
 -15  25  -5  167.38   44.20
  14  26  -5   78.29   29.60
 -14  26   5   57.09   42.30
  12  26  -5   23.40   28.70
 -12  26   5   23.90   40.40
  10  26  -5    0.50   28.50
 -10  26   5  -24.80   39.90
   8  26  -5   29.80   27.70
  -8  26   5  -17.50   36.10
  -6  26   5   61.69   35.60
   6  26  -5   60.59   27.10
  -4  26   5   30.00   35.80
   4  26  -5   46.30   27.10
   2  26  -5   66.19   28.90
  -2  26   5   40.60   34.00
   0  26  -5  140.49   31.10
   0  26   5  108.09   34.10
   2  26   5  113.49   34.40
  -2  26  -5  142.29   32.10
   4  26   5  260.67   36.30
  -4  26  -5  319.27   33.00
  -6  26  -5   17.50   28.60
   6  26   5   52.79   32.60
  -8  26  -5    2.10   31.00
   8  26   5   -9.40   30.90
 -10  26  -5   16.60   37.20
  10  26   5   -2.20   33.20
 -12  26  -5   31.20   34.90
  12  26   5  -11.00   33.50
 -14  26  -5   57.89   39.60
 -13  27   5   20.40   41.50
  13  27  -5  -22.50   30.10
  11  27  -5   -4.80   29.80
 -11  27   5    3.60   40.90
  -9  27   5   16.10   40.50
   9  27  -5   39.60   30.60
  -7  27   5   30.40   38.30
   7  27  -5   26.80   30.60
   5  27  -5  307.77   34.50
  -5  27   5  274.37   41.50
   3  27  -5  479.35   44.00
  -3  27   5  526.75   45.80
   1  27  -5  304.87   31.70
  -1  27   5  328.47   40.10
  -1  27  -5    9.50   26.90
   1  27   5   49.20   34.50
  -3  27  -5    4.00   33.00
   3  27   5   22.00   33.10
   5  27   5   25.20   32.50
  -5  27  -5   38.00   30.00
   7  27   5   85.79   33.30
  -7  27  -5  175.58   37.00
   9  27   5   32.90   33.70
  -9  27  -5   53.79   34.50
 -11  27  -5   97.19   36.60
  11  27   5   31.60   34.80
 -13  27  -5   51.69   39.20
  13  27   5   66.59   41.20
 -12  28   5   14.50   50.79
  12  28  -5    8.30   41.90
  10  28  -5  -22.10   29.60
 -10  28   5   26.80   41.90
   8  28  -5    3.50   30.80
  -8  28   5   40.50   40.30
   6  28  -5   38.10   29.50
  -6  28   5    5.40   38.30
   4  28  -5   21.60   30.60
  -4  28   5  -18.10   42.20
  -2  28   5   38.40   37.10
   2  28  -5   18.40   31.40
   0  28  -5   32.30   32.60
   0  28   5  -16.80   36.00
  -2  28  -5   47.70   29.50
   2  28   5   20.10   35.10
  -4  28  -5  155.18   36.20
   4  28   5  103.19   40.20
  -6  28  -5   11.10   32.50
   6  28   5   52.39   34.30
   8  28   5  -11.40   38.70
  -8  28  -5   61.39   34.40
  10  28   5   16.10   39.80
 -10  28  -5   63.89   40.70
  12  28   5  -34.30   42.00
 -12  28  -5   26.90   42.50
  11  29  -5   -5.40   31.80
 -11  29   5  250.07   48.30
  -9  29   5   70.79   45.30
   9  29  -5   90.99   34.50
  -7  29   5  -14.80   41.80
   7  29  -5  -35.40   32.40
   5  29  -5  100.49   34.80
  -5  29   5   65.89   42.10
   3  29  -5  164.98   35.20
  -3  29   5  179.08   41.30
   1  29  -5  443.86   41.20
  -1  29   5  467.95   46.70
   1  29   5   58.29   43.60
  -1  29  -5   30.20   34.50
   3  29   5  -17.20   36.50
  -3  29  -5   25.00   31.60
  -5  29  -5   -1.30   37.00
   5  29   5   -8.50   36.80
  -7  29  -5   52.09   34.70
   7  29   5    2.90   35.10
   9  29   5   -0.80   40.60
  -9  29  -5   32.20   36.90
  11  29   5   36.20   42.50
 -11  29  -5   62.89   40.50
 -10  30   5   -5.00   44.60
  10  30  -5    4.10   32.70
  -8  30   5   10.10   43.90
   8  30  -5   42.20   36.20
  -6  30   5   14.60   43.10
   6  30  -5   13.30   33.60
   4  30  -5   -1.50   33.30
  -4  30   5  -30.50   41.90
   2  30  -5   26.40   33.90
  -2  30   5  -20.20   41.50
   0  30   5    1.10   39.60
   0  30  -5   40.10   35.60
   2  30   5    4.90   38.10
  -2  30  -5   21.30   32.70
   4  30   5   34.10   37.90
  -4  30  -5   45.70   33.90
  -6  30  -5   92.59   40.00
   6  30   5    1.90   37.90
   8  30   5    5.20   42.00
  -8  30  -5   30.90   43.10
  -7  31   5   -1.50   46.10
   7  31  -5  -27.90   36.60
  -5  31   5  -10.10   50.89
   5  31  -5   52.99   38.10
  -3  31   5   96.59   44.20
   3  31  -5  110.79   36.60
  -1  31   5  170.58   45.80
   1  31  -5  243.18   39.90
  -1  31  -5   85.29   38.00
   1  31   5  115.49   46.10
   3  31   5    1.10   40.00
  -3  31  -5   30.00   34.90
   5  31   5    6.70   39.40
  -5  31  -5   15.50   36.90
   7  31   5   26.10   44.70
  -7  31  -5   24.60   37.90
   4  32  -5   28.70   37.90
  -4  32   5  -23.60   52.19
  -2  32   5   -4.10   43.70
   2  32  -5   10.10   38.10
   0  32  -5  -28.70   39.10
   0  32   5   28.20   42.60
  -2  32  -5    0.00   36.10
   2  32   5   33.20   43.00
  -4  32  -5    9.70   37.70
   4  32   5   16.30   47.20
 -24   0   6  346.47   34.60
 -22   0   6  338.67   31.50
 -20   0   6   25.20   22.70
 -18   0   6  570.74   36.60
 -16   0   6   38.40   15.90
 -14   0   6  640.04   35.20
 -12   0   6  764.42   38.40
 -10   0   6 2229.78   98.39
  -8   0   6  270.57   18.10
  -6   0   6 3390.86  147.09
  -4   0   6 4390.96  189.68
   0   0  -6 1663.63   72.89
   2   0   6  668.73   35.70
  -2   0  -6  633.64   30.60
  -4   0  -6 1257.07   54.29
   4   0   6 1156.38   55.79
   6   0   6 6620.34  327.27
  -6   0  -6 8543.75  327.67
  -8   0  -6 8680.33  375.56
 -10   0  -6 3711.93  162.78
 -12   0  -6   -1.40   19.60
 -14   0  -6   33.00   18.60
 -16   0  -6  110.89   22.90
 -18   0  -6 1800.32   86.09
 -20   0  -6  327.07   33.30
 -20   0  -6  352.86   31.70
 -22   0  -6  295.37   37.80
 -24   0  -6  316.07   38.80
 -25  -1   6  125.49   28.00
 -25  -1   6   84.69   44.00
 -25   1   6  101.79   28.70
 -23  -1   6    0.80   27.00
 -23   1   6   38.40   25.30
 -21  -1   6   28.30   24.20
 -21   1   6   26.50   21.80
 -19  -1   6  273.57   25.60
 -19   1   6  293.37   26.70
 -17  -1   6  661.63   37.50
 -17   1   6  630.44   36.00
 -15  -1   6  819.92   42.00
 -15   1   6  804.22   41.20
 -13  -1   6  176.58   17.00
 -13   1   6  185.68   18.50
 -11  -1   6  279.07   20.10
 -11   1   6  277.27   19.80
  -9  -1   6   -4.00   10.40
  -9   1   6    8.80   12.40
  -7  -1   6  996.10   45.10
  -7   1   6 1009.90   45.90
  -5  -1   6 1017.10   44.30
  -5   1   6  979.00   45.00
  -3  -1   6  250.17   13.40
  -3   1   6  248.28   14.50
   1  -1  -6  393.26   19.00
   1   1  -6  384.26   18.80
  -1  -1  -6  680.13   31.50
   1  -1   6  678.03   38.60
  -1   1  -6  678.23   31.50
   3  -1   6   74.19   12.80
  -3  -1  -6   97.69   10.80
  -3   1  -6  106.09   10.80
   3   1   6  110.09   19.10
   5  -1   6  518.75   32.10
  -5  -1  -6  640.44   28.70
  -5   1  -6  624.44   29.70
   5   1   6  581.44   29.60
  -7  -1  -6 1204.18   56.59
  -7   1  -6 1256.17   56.69
  -9  -1  -6  106.69   16.30
  -9   1  -6  105.19   15.90
 -11  -1  -6   -5.90   15.90
 -11   1  -6  -27.40   15.40
 -13  -1  -6   12.80   17.20
 -13   1  -6    8.90   17.20
 -15  -1  -6  147.29   22.90
 -15   1  -6  176.88   22.50
 -17  -1  -6  261.77   27.50
 -17   1  -6  282.57   25.80
 -19  -1  -6    4.40   28.30
 -19   1  -6  -32.20   24.70
 -21  -1  -6   17.80   27.00
 -21   1  -6   41.10   28.50
 -23  -1  -6  120.59   32.10
 -23   1  -6  133.79   33.30
 -24  -2   6  273.87   47.00
 -24  -2   6  275.37   29.60
 -24   2   6  290.27   34.20
 -22  -2   6  285.97   30.20
 -22   2   6  301.77   30.90
 -20  -2   6  193.78   22.50
 -20   2   6  199.38   24.70
 -18  -2   6  136.89   22.00
 -18   2   6  170.08   23.70
 -16  -2   6  155.08   18.80
 -16   2   6  154.58   24.60
 -14  -2   6  186.58   17.60
 -14   2   6  207.78   20.80
 -12  -2   6  122.59   14.20
 -12   2   6  118.79   17.00
 -10  -2   6  625.04   30.70
 -10   2   6  607.94   31.60
  -8  -2   6 1919.41   84.49
  -8   2   6 1932.91   85.09
  -6  -2   6 3906.61  166.28
  -6   2   6 3788.12  166.98
  -4  -2   6 1027.80   44.10
  -4   2   6  979.90   45.10
  -2  -2   6 2547.25  113.89
   2   2  -6 2464.15  107.59
  -2   2   6 2461.05  108.39
   0  -2   6 1995.40   91.39
   0  -2  -6 2011.70   86.69
   0   2  -6 1948.61   86.19
  -4  -2  -6 2438.36  109.29
  -4   2  -6 2559.54  109.29
  -6  -2  -6 6068.89  255.97
   6  -2   6 5188.68  257.07
  -6   2  -6 6495.75  256.37
  -8  -2  -6 2001.10   89.29
  -8   2  -6 1999.80   89.49
 -10  -2  -6   69.39   15.50
 -12  -2  -6  133.69   21.20
 -14  -2  -6   11.20   18.40
 -14   2  -6  -16.90   18.60
 -16  -2  -6  215.08   23.90
 -16   2  -6  179.28   25.10
 -18  -2  -6  690.13   43.30
 -18   2  -6  654.73   43.50
 -20  -2  -6  517.35   40.30
 -20   2  -6  476.55   41.00
 -22  -2  -6  259.37   33.40
 -22   2  -6  276.17   33.80
 -24  -2  -6  157.68   34.90
 -24   2  -6  202.18   36.90
 -25  -3   6   36.90   45.40
 -25  -3   6   51.99   31.70
 -25   3   6   51.59   32.30
 -23  -3   6   17.90   42.60
 -23  -3   6   55.29   26.30
 -23   3   6    2.90   24.60
 -21  -3   6   68.49   38.20
 -21  -3   6   51.89   23.10
 -21   3   6   54.49   23.10
 -19  -3   6  122.89   21.90
 -19   3   6   97.79   22.00
 -17  -3   6   55.29   18.30
 -17   3   6   66.19   19.30
 -15  -3   6  599.94   33.40
 -15   3   6  601.44   34.20
 -13  -3   6  501.35   27.40
 -13   3   6  455.05   30.80
 -11  -3   6   26.80   11.50
 -11   3   6   24.20   15.30
  -9  -3   6 1529.15   67.69
  -9   3   6 1522.55   69.29
  -7  -3   6  696.83   32.30
  -7   3   6  714.43   34.20
  -5  -3   6  588.74   45.20
  -5  -3   6  659.13   28.30
  -5   3   6  631.04   31.30
  -3  -3   6 1299.47   57.49
  -3  -3   6 1358.06   67.09
  -3   3   6 1337.47   59.39
   1  -3  -6   51.69    9.70
  -1  -3   6   44.70   17.30
   1   3  -6   38.30    5.50
  -1  -3  -6  543.15   26.10
   1  -3   6  527.65   35.00
  -1   3  -6  526.35   25.40
  -3  -3  -6  384.26   20.10
   3  -3   6  315.67   26.80
  -3   3  -6  356.96   19.50
  -5  -3  -6  917.21   43.50
   5  -3   6  938.61   48.40
  -5   3  -6  943.71   43.70
  -7  -3  -6  669.73   32.00
  -7   3  -6  624.74   33.80
  -9  -3  -6  684.13   34.00
  -9   3  -6  672.43   36.30
 -11  -3  -6   25.30   15.30
 -11   3  -6   23.40   16.90
 -13  -3  -6   47.90   18.20
 -13   3  -6   65.79   19.80
 -15  -3  -6   64.19   20.00
 -15   3  -6   60.89   21.00
 -17  -3  -6  122.49   23.90
 -17   3  -6  120.69   24.20
 -19  -3  -6   -5.50   23.90
 -19   3  -6    1.00   25.70
 -21  -3  -6   75.29   27.50
 -21   3  -6   61.69   29.60
 -23  -3  -6  215.88   33.10
 -23   3  -6  217.28   35.40
 -24  -4   6  185.28   46.80
 -24  -4   6  178.58   30.70
 -24   4   6  158.78   29.20
 -22  -4   6  170.58   27.10
 -22  -4   6  157.98   41.60
 -22   4   6  162.68   30.30
 -20  -4   6  216.58   39.70
 -20  -4   6  242.08   25.30
 -20   4   6  265.27   27.10
 -18  -4   6  101.49   35.50
 -18  -4   6  112.59   23.50
 -18   4   6  117.39   22.30
 -16  -4   6  157.28   18.00
 -16  -4   6  130.29   32.50
 -16   4   6  142.89   19.80
 -14  -4   6   43.70   25.30
 -14  -4   6   47.10   13.80
 -14   4   6   70.09   17.20
 -12  -4   6   98.09   12.90
 -12   4   6   84.19   16.00
 -10  -4   6  297.17   18.60
 -10  -4   6  254.57   42.00
 -10   4   6  311.37   21.70
  -8  -4   6  637.64   50.99
  -8  -4   6  698.93   31.90
  -8   4   6  723.93   34.90
  -6  -4   6  906.81   38.60
  -6  -4   6  831.12   51.79
  -6   4   6  873.81   41.10
  -4  -4   6   98.09   20.90
  -4   4   6  103.09   11.60
  -2  -4   6 9031.30  392.06
  -2   4   6 8947.10  387.86
   0  -4  -6 1696.53   73.79
   0  -4   6 1653.33   79.09
   0   4  -6 1670.03   72.89
   2  -4   6 1737.33   80.59
  -2   4  -6 1750.22   76.49
  -4  -4  -6 2001.00   85.39
   4  -4   6 1722.93   89.39
  -4   4  -6 2081.49   85.39
  -6  -4  -6 2335.17  103.79
  -6   4  -6 2374.76  103.99
  -8  -4  -6  796.62   39.90
  -8   4  -6  815.72   40.70
 -10  -4  -6  209.48   18.70
 -10   4  -6  215.78   20.30
 -12   4  -6  -15.70   18.10
 -14  -4  -6   -5.30   18.00
 -14   4  -6   -4.60   15.60
 -16  -4  -6   69.89   21.90
 -16   4  -6   62.09   23.60
 -18  -4  -6  390.16   35.00
 -18   4  -6  423.26   36.30
 -20  -4  -6  509.05   40.30
 -20   4  -6  520.55   41.60
 -22  -4  -6  145.69   33.70
 -22   4  -6  166.18   32.90
 -24  -4  -6   -1.40   35.80
 -24   4  -6   -7.00   34.90
 -25  -5   6   14.50   47.10
 -25  -5   6   38.90   30.40
 -25   5   6   10.80   29.80
 -23  -5   6   61.59   42.30
 -23  -5   6   38.20   26.80
 -23   5   6   29.80   30.20
 -21  -5   6    2.80   37.30
 -21  -5   6   18.80   23.90
 -21   5   6    4.30   24.10
 -19  -5   6    8.40   36.60
 -19  -5   6    5.20   20.10
 -19   5   6   72.19   22.20
 -17  -5   6  165.08   19.90
 -17   5   6  150.28   22.80
 -15  -5   6  335.77   49.20
 -15  -5   6  337.77   24.50
 -15   5   6  319.67   27.30
 -13  -5   6  256.17   45.60
 -13  -5   6  278.57   20.20
 -13   5   6  264.07   23.60
 -11  -5   6   39.30   24.30
 -11  -5   6   54.69   10.80
 -11   5   6   48.30   16.90
  -9  -5   6  397.56   40.30
  -9  -5   6  419.36   21.50
  -9   5   6  427.36   28.10
  -7  -5   6  734.53   32.70
  -7  -5   6  716.23   51.89
  -7   5   6  715.93   36.20
  -5  -5   6  499.55   39.00
  -5   5   6  459.45   26.00
  -3  -5   6    4.50   18.70
  -3   5   6  -10.40   12.10
  -1  -5   6  939.51   53.39
   1   5  -6 1042.00   43.80
  -1  -5  -6  102.89   11.30
   1  -5   6  140.19   24.20
  -1   5  -6   80.39    9.90
  -3  -5  -6   89.79   11.90
  -3   5  -6   86.99   11.00
  -7  -5  -6   11.30   13.60
  -7   5  -6  -23.30   14.40
  -9  -5  -6  201.58   18.30
  -9   5  -6  199.68   18.60
 -11  -5  -6   33.20   15.60
 -11   5  -6   10.80   17.60
 -13  -5  -6   17.10   17.20
 -13   5  -6    6.70   18.40
 -15  -5  -6   29.40   19.10
 -15   5  -6   30.40   21.60
 -17  -5  -6   19.30   21.50
 -17   5  -6   18.00   24.50
 -19  -5  -6  -23.70   26.80
 -19   5  -6    8.40   26.90
 -21  -5  -6   96.09   28.60
 -21   5  -6  113.79   30.90
 -23  -5  -6  265.17   35.20
 -23   5  -6  317.47   38.00
 -24  -6   6   39.10   46.00
 -24  -6   6    7.90   28.10
 -24   6   6   11.00   29.40
 -22  -6   6  139.79   42.10
 -22  -6   6  152.28   26.60
 -22   6   6  135.59   28.50
 -20  -6   6   74.19   22.80
 -20  -6   6   67.29   39.00
 -20   6   6  109.99   28.00
 -18  -6   6    9.00   33.80
 -18  -6   6   23.60   19.60
 -18   6   6   22.70   21.60
 -16  -6   6   97.19   33.50
 -16  -6   6  144.49   18.90
 -16   6   6  127.59   21.10
 -14  -6   6  456.45   27.20
 -14  -6   6  448.56   51.29
 -14   6   6  462.15   43.40
 -12  -6   6  343.37   21.80
 -12  -6   6  326.17   46.30
 -12   6   6  304.07   24.90
 -10  -6   6 1745.73   91.49
 -10  -6   6 1818.22   77.69
 -10   6   6 1719.43   79.79
  -8  -6   6 2195.48  107.49
  -8  -6   6 2193.88   94.79
  -8   6   6 2152.28   96.99
  -6  -6   6   74.29   25.10
  -6  -6   6   88.89    6.60
  -6   6   6   90.89   14.40
  -4  -6   6  544.85   40.90
  -4   6   6  565.44   29.40
  -2  -6   6    2.50   18.20
   2   6  -6   -0.50    5.20
  -2   6   6   -0.30   11.80
   0  -6  -6 2354.36  101.99
   0  -6   6 2139.69  108.29
   0   6  -6 2478.55  101.19
  -2  -6  -6   27.50   10.70
   2  -6   6   61.79   20.30
  -2   6  -6   14.50   10.60
  -4  -6  -6  456.65   24.80
  -4   6  -6  428.76   24.90
  -6  -6  -6 2270.77  101.59
  -6   6  -6 2324.57  101.99
  -8  -6  -6 3025.60  137.19
  -8   6  -6 3218.98  137.79
 -10  -6  -6  660.43   35.80
 -10   6  -6  661.93   37.10
 -12  -6  -6  285.47   29.10
 -12   6  -6  299.47   26.90
 -14  -6  -6   49.80   18.90
 -14   6  -6   35.70   20.00
 -16  -6  -6   21.20   21.00
 -16   6  -6   10.60   17.90
 -18  -6  -6  295.17   31.00
 -18   6  -6  296.57   30.70
 -20  -6  -6  308.27   31.50
 -20   6  -6  343.77   34.10
 -22  -6  -6   86.49   30.10
 -22   6  -6  101.89   31.80
 -24  -6  -6    8.10   32.70
 -24   6  -6   24.90   39.70
 -23  -7   6   49.40   26.60
 -23  -7   6   66.49   44.30
 -23   7   6   44.50   32.70
 -21  -7   6   19.60   39.60
 -21  -7   6   54.29   34.40
 -21   7   6    2.80   25.90
 -19  -7   6   12.30   35.80
 -19  -7   6   33.10   36.40
 -19   7   6   35.10   23.40
 -17  -7   6  173.88   20.20
 -17   7   6  186.18   24.00
 -15  -7   6  211.78   18.40
 -15  -7   6  194.68   33.90
 -15   7   6  229.38   25.40
 -13  -7   6  113.89   13.50
 -13  -7   6   63.89   26.10
 -13   7   6   82.49   19.20
 -11  -7   6  115.19   26.70
 -11  -7   6  135.49   12.30
 -11   7   6  145.69   17.90
  -9  -7   6    7.80   26.00
  -9  -7   6    7.40    8.40
  -9   7   6   20.10   15.90
  -7  -7   6  116.49    9.00
  -7  -7   6   89.49   24.40
  -7   7   6   98.89   16.40
  -5  -7   6 1006.10   59.89
   5   7  -6 1112.59   46.10
  -5   7   6 1047.00   49.99
  -3  -7   6   13.40   20.10
   3   7  -6    6.40    5.20
  -3   7   6   -3.80   12.60
  -1  -7   6   27.40   21.10
   1   7  -6    1.00    7.80
  -1   7   6   12.80   13.00
   1  -7   6  194.58   29.70
  -1  -7  -6  172.68   15.80
  -1   7  -6  156.08   14.40
  -3  -7  -6   -3.10   11.50
  -3   7  -6  -23.10   10.60
  -7  -7  -6  326.67   23.40
  -7   7  -6  351.16   24.80
  -9  -7  -6  469.55   26.20
  -9   7  -6  462.25   27.20
 -11  -7  -6   86.49   16.90
 -13  -7  -6   22.00   17.30
 -13   7  -6   12.80   20.30
 -15  -7  -6   38.60   20.00
 -15   7  -6   27.50   22.40
 -17  -7  -6   79.49   23.20
 -17   7  -6   65.79   25.70
 -19  -7  -6   45.00   25.00
 -19   7  -6   13.30   28.90
 -21  -7  -6   31.00   28.70
 -21   7  -6   17.50   31.70
 -23  -7  -6  102.49   36.40
 -23   7  -6  106.49   34.60
 -24  -8   6   80.49   29.00
 -24  -8   6   35.50   48.40
 -24   8   6   70.69   32.00
 -22  -8   6   69.09   43.50
 -22  -8   6  119.79   26.20
 -22   8   6  161.38   29.70
 -20  -8   6    7.40   22.10
 -20  -8   6   20.50   40.80
 -20   8   6   41.20   25.00
 -18  -8   6  -13.40   37.00
 -18  -8   6  -12.50   19.80
 -18   8   6   -2.70   23.40
 -16  -8   6   66.49   16.80
 -16  -8   6   40.40   38.60
 -16   8   6   63.69   24.50
 -14  -8   6  462.15   28.00
 -14  -8   6  483.75   54.39
 -14   8   6  438.56   31.90
 -12  -8   6  803.02   55.89
 -12  -8   6  868.11   39.10
 -12   8   6  758.52   42.60
 -10  -8   6  779.02   36.10
 -10  -8   6  785.42   57.69
 -10   8   6  749.82   40.40
  -8  -8   6  765.32   34.70
  -8  -8   6  755.42   56.39
  -8   8   6  787.42   39.90
  -6  -8   6  892.21   55.59
  -6   8   6  868.61   43.70
  -4  -8   6 1468.35   78.39
  -4   8   6 1535.75   70.09
   4   8  -6 1602.64   66.89
  -2  -8   6   37.90   20.70
   2   8  -6   12.80    7.80
  -2   8   6   27.50   11.10
   0  -8   6  220.18   37.80
   0   8  -6  124.59   11.70
  -4  -8  -6  717.93   36.40
  -4   8  -6  749.53   37.70
  -6  -8  -6  824.42   40.10
  -6   8  -6  783.12   40.60
  -8  -8  -6 1665.73   77.79
  -8   8  -6 1771.42   78.79
 -10  -8  -6 1024.30   51.49
 -10   8  -6 1098.99   51.29
 -12  -8  -6  244.28   24.70
 -12   8  -6  231.38   23.80
 -14  -8  -6   86.59   22.80
 -14   8  -6   75.99   23.60
 -16  -8  -6   -5.20   21.10
 -16   8  -6   17.60   23.90
 -18  -8  -6  377.16   35.40
 -18   8  -6  333.37   31.30
 -20  -8  -6  158.48   29.10
 -20   8  -6  156.28   31.30
 -22  -8  -6   46.00   31.10
 -22   8  -6   53.99   34.40
 -24  -8  -6   18.60   33.50
 -24   8  -6   56.89   37.60
 -23  -9   6   11.10   27.60
 -23  -9   6  -18.00   46.50
 -23   9   6   23.80   31.10
 -21  -9   6    8.80   40.80
 -21  -9   6   -6.40   25.20
 -21   9   6   23.60   27.40
 -19  -9   6   15.70   36.60
 -19  -9   6   33.80   38.50
 -19   9   6   63.49   25.70
 -17  -9   6  102.59   18.80
 -17  -9   6   74.79   36.40
 -17   9   6   95.29   24.50
 -15  -9   6  320.37   25.60
 -15  -9   6  305.07   53.39
 -15   9   6  358.26   30.10
 -13  -9   6  122.49   14.20
 -13  -9   6  101.19   28.80
 -13   9   6   89.09   20.70
 -11  -9   6  462.45   23.90
 -11  -9   6  445.06   50.79
 -11   9   6  426.26   30.50
  -9  -9   6  211.48   38.20
  -9  -9   6  213.68   14.40
  -9   9   6  227.08   20.60
  -7  -9   6  604.34   47.70
  -7   9   6  578.04   31.50
  -5  -9   6  452.75   41.80
  -5   9   6  382.66   26.40
   5   9  -6  343.07   19.20
  -3  -9   6   99.49   23.60
   3   9  -6   50.09    8.30
  -3   9   6   35.20   15.80
  -1  -9   6  529.25   40.60
  -1   9   6  430.46   27.50
   1   9  -6  388.16   22.90
  -5  -9  -6  266.27   20.90
  -5   9  -6  247.08   21.40
  -7  -9  -6  124.89   15.90
  -7   9  -6  104.19   17.40
  -9  -9  -6  451.05   28.80
  -9   9  -6  489.75   31.10
 -11  -9  -6  163.48   31.90
 -11   9  -6  151.58   21.90
 -13  -9  -6   -4.10   18.90
 -13   9  -6  -12.40   20.70
 -15  -9  -6   20.60   21.40
 -15   9  -6  -19.90   23.10
 -17  -9  -6  180.88   26.00
 -17   9  -6  139.49   28.30
 -19  -9  -6   36.70   26.40
 -19   9  -6   34.00   29.50
 -21  -9  -6   -8.10   29.20
 -21   9  -6   -8.00   31.00
 -23  -9  -6   17.70   32.50
 -23   9  -6   27.00   36.00
 -24 -10   6  112.09   52.19
 -24 -10   6  113.59   33.90
 -24  10   6  157.38   38.50
 -22 -10   6   38.00   47.50
 -22 -10   6   74.79   27.10
 -22  10   6  110.09   30.30
 -20 -10   6   -3.60   42.90
 -20 -10   6   13.20   22.70
 -20  10   6    5.90   26.70
 -18 -10   6   12.80   20.90
 -18 -10   6   15.80   39.80
 -18  10   6   12.20   25.30
 -16 -10   6  348.37   26.60
 -16 -10   6  237.28   42.20
 -16  10   6  258.87   27.60
 -14 -10   6  545.75   30.40
 -14 -10   6  546.15   51.79
 -14  10   6  493.65   35.70
 -12 -10   6  162.88   30.30
 -12 -10   6  178.28   16.70
 -12  10   6  198.78   22.20
 -10 -10   6   39.60    9.30
 -10 -10   6   68.09   30.20
 -10  10   6   50.19   18.30
  -8 -10   6  470.15   44.40
  -8 -10   6  410.06   21.00
  -8  10   6  387.36   29.30
  -6 -10   6  765.62   53.49
   6  10  -6  730.63   33.90
  -6  10   6  717.43   39.40
  -4 -10   6 1092.29   59.29
   4  10  -6  862.21   41.90
  -4  10   6  858.41   44.70
  -2  10   6  404.46   26.70
   2  10  -6  377.06   21.60
  -6 -10  -6 1421.76   66.79
  -6  10  -6 1499.75   67.49
  -8 -10  -6  742.53   39.00
  -8  10  -6  763.92   40.50
 -10 -10  -6 1275.87   62.69
 -12 -10  -6  452.15   29.90
 -12  10  -6  372.26   32.50
 -14 -10  -6  391.96   30.70
 -14  10  -6  354.06   33.80
 -16 -10  -6   67.79   23.70
 -16  10  -6   71.59   25.80
 -18 -10  -6  281.57   29.60
 -18  10  -6  266.67   32.70
 -20 -10  -6  209.18   31.70
 -20  10  -6  199.88   33.80
 -22 -10  -6   66.09   33.10
 -22  10  -6  129.99   35.30
 -23 -11   6    8.90   29.00
 -23 -11   6  -55.19   49.99
 -23  11   6   62.89   37.30
 -21 -11   6  -21.80   46.80
 -21 -11   6   -8.90   24.80
 -21  11   6   54.29   32.90
 -19 -11   6  -34.40   40.70
 -19 -11   6    5.90   26.20
 -19  11   6   21.00   30.20
 -17 -11   6   27.70   38.10
 -17 -11   6   51.99   18.10
 -17  11   6   35.40   26.10
 -15 -11   6  152.08   44.90
 -15 -11   6  186.08   18.80
 -15  11   6  191.68   26.30
 -13 -11   6  330.67   53.69
 -13 -11   6  351.86   23.40
 -13  11   6  333.47   30.40
 -11 -11   6  234.38   17.00
 -11 -11   6  203.18   32.70
 -11  11   6  260.97   23.60
  -9 -11   6  861.01   57.89
  -9 -11   6  802.32   38.00
  -9  11   6  846.62   44.20
  -7 -11   6  160.58   31.50
  -7  11   6  154.98   19.60
   7  11  -6  139.99   12.20
  -5  11   6  494.45   31.10
   5  11  -6  471.75   24.20
   3  11  -6   -1.10    9.90
  -3  11   6   21.10   16.80
  -5 -11  -6  331.67   22.90
  -5  11  -6  273.37   23.60
  -7 -11  -6  631.34   33.50
  -7  11  -6  570.44   34.50
  -9 -11  -6   16.90   15.80
  -9  11  -6    7.30   18.10
 -11 -11  -6    2.20   17.30
 -11  11  -6   20.80   19.60
 -13 -11  -6   34.30   20.20
 -13  11  -6   21.50   23.10
 -15 -11  -6   70.49   22.40
 -15  11  -6   51.19   24.60
 -17 -11  -6   18.30   24.80
 -17  11  -6   17.70   27.20
 -19 -11  -6    4.60   26.80
 -19  11  -6    6.00   30.00
 -21 -11  -6   11.60   31.00
 -21  11  -6    7.60   33.40
 -23 -11  -6   38.50   34.20
 -23  11  -6   22.60   36.30
 -22 -12   6   -0.40   51.29
 -22 -12   6   67.09   28.80
 -22  12   6  101.29   37.10
 -20 -12   6   -0.90   24.00
 -20 -12   6   -8.90   44.60
 -20  12   6   10.60   33.10
 -18 -12   6   93.49   20.30
 -18 -12   6   51.09   43.60
 -18  12   6   88.89   28.60
 -16 -12   6  236.28   21.20
 -16 -12   6  193.18   42.50
 -16  12   6  254.37   31.20
 -14 -12   6  377.56   24.70
 -14 -12   6  310.67   51.59
 -14  12   6  361.86   32.70
 -12 -12   6  462.45   25.60
 -12 -12   6  505.25   58.59
 -12  12   6  453.45   34.40
 -10 -12   6    4.50   28.00
 -10 -12   6   25.40    9.60
 -10  12   6   20.60   19.70
  -8 -12   6  105.09   29.60
  -8  12   6  121.29   20.90
   8  12  -6  134.59   12.50
  -6 -12   6 1014.50   64.99
   6  12  -6 1040.60   46.10
  -6  12   6  964.10   50.59
  -4 -12   6 2384.86  107.39
   4  12  -6 2004.70   93.79
  -4  12   6 2036.70   96.59
  -2  12   6 1040.30   52.29
   2  12  -6 1083.69   49.00
   0  12   6  848.82   43.20
   0  12  -6  797.12   39.70
  -4 -12  -6 1047.20   48.80
  -4  12  -6  979.90   48.70
  -6 -12  -6  761.32   39.10
  -6  12  -6  757.72   40.10
  -8 -12  -6  455.75   28.90
  -8  12  -6  452.95   30.70
 -10 -12  -6 1057.59   51.59
 -10  12  -6 1018.50   51.19
 -12 -12  -6  382.06   29.70
 -12  12  -6  350.16   32.40
 -14 -12  -6    5.40   23.90
 -14  12  -6   25.40   24.70
 -16 -12  -6  420.96   36.90
 -16  12  -6  499.25   40.20
 -18 -12  -6  382.76   38.10
 -18  12  -6  405.26   36.40
 -20 -12  -6  163.98   31.10
 -20  12  -6  102.39   34.40
 -22 -12  -6  100.79   33.50
 -22  12  -6   93.89   36.20
 -23 -13   6   80.99   32.40
 -23  13   6  119.69   39.40
 -21 -13   6   -7.40   47.20
 -21 -13   6   14.00   26.80
 -21  13   6   30.50   35.90
 -19 -13   6  -14.40   47.30
 -19 -13   6   27.20   25.30
 -19  13   6   18.40   29.20
 -17 -13   6   35.40   18.90
 -17 -13   6   11.80   41.70
 -17  13   6   67.39   27.50
 -15 -13   6   82.09   16.50
 -15 -13   6   54.19   40.20
 -15  13   6   51.59   25.70
 -13 -13   6  426.76   25.70
 -13 -13   6  362.66   54.49
 -13  13   6  428.06   34.40
 -11 -13   6  151.48   13.20
 -11 -13   6  141.59   32.80
 -11  13   6  146.39   23.70
  -9 -13   6   28.00   29.90
  -9  13   6   47.30   21.00
   7  13  -6  148.69   13.40
  -7  13   6  149.29   21.30
   5  13  -6  174.08   16.70
  -5  13   6  167.38   21.00
   3  13  -6    3.40   11.90
  -3  13   6   26.00   18.80
  -5 -13  -6  360.46   24.00
  -5  13  -6  263.27   24.30
  -7 -13  -6  269.27   22.90
  -7  13  -6  241.28   22.60
  -9 -13  -6   44.40   17.00
  -9  13  -6   44.90   21.80
 -11 -13  -6   17.30   18.70
 -11  13  -6  -20.00   21.10
 -13 -13  -6   11.00   21.00
 -13  13  -6  -25.70   22.50
 -15 -13  -6   87.79   24.10
 -15  13  -6   86.99   26.90
 -17 -13  -6   67.49   29.10
 -17  13  -6   36.80   29.10
 -19 -13  -6   26.70   32.30
 -19  13  -6   31.70   31.20
 -21 -13  -6   42.40   33.10
 -21  13  -6   34.90   35.60
 -22 -14   6  -20.30   29.30
 -22  14   6   24.40   34.40
 -20 -14   6   38.30   25.20
 -20  14   6    8.20   30.90
 -18 -14   6  -51.49   44.80
 -18 -14   6   22.20   21.00
 -18  14   6   36.90   28.40
 -16 -14   6  -30.80   42.10
 -16 -14   6   17.80   17.50
 -16  14   6   38.70   27.10
 -14 -14   6   59.29   40.40
 -14 -14   6  134.29   16.00
 -14  14   6  106.79   26.40
 -12 -14   6   10.80   12.70
 -12 -14   6   13.00   37.20
 -12  14   6   34.30   18.70
 -10 -14   6    7.00   43.40
 -10  14   6   15.30   21.80
  -8 -14   6  134.09   32.90
   8  14  -6   41.30   13.00
  -8  14   6   63.19   21.20
  -6  14   6   82.09   20.00
   6  14  -6   76.09   12.60
  -4 -14  -6   59.59   15.70
  -4  14  -6   58.39   18.40
  -6 -14  -6  156.38   17.90
  -6  14  -6   86.29   18.50
  -8 -14  -6  258.87   23.90
  -8  14  -6  285.77   42.80
 -10 -14  -6  -10.90   17.80
 -10  14  -6  -23.80   20.70
 -12 -14  -6   14.90   20.60
 -12  14  -6    7.70   23.50
 -14 -14  -6   47.20   22.90
 -14  14  -6  129.09   27.10
 -16 -14  -6    2.30   28.20
 -16  14  -6    9.50   27.60
 -18 -14  -6   45.70   27.40
 -18  14  -6   28.70   30.00
 -20 -14  -6   19.70   34.70
 -20  14  -6   52.69   34.70
 -22 -14  -6   31.10   35.50
 -22  14  -6   74.59   41.80
 -21 -15   6  102.49   28.10
 -21  15   6   49.60   34.60
 -19  15   6   49.20   31.90
 -17 -15   6   34.50   19.10
 -17 -15   6  -82.79   44.80
 -17  15   6   42.70   28.60
 -15 -15   6   43.80   44.40
 -15 -15   6  139.79   18.30
 -15  15   6  128.09   28.20
 -13 -15   6   28.60   14.00
 -13 -15   6   -5.50   39.90
 -13  15   6   29.70   24.80
 -11 -15   6   18.30   39.70
 -11  15   6   -3.10   23.60
  -9 -15   6   95.09   44.30
  -9  15   6  124.69   23.30
   9  15  -6  106.59   15.30
  -7 -15   6  447.26   75.69
   7  15  -6  328.67   22.90
  -7  15   6  262.37   27.20
  -5 -15   6  885.21   71.19
   5  15  -6  700.13   37.80
   3  15  -6  399.46   24.80
  -3  15   6  450.35   32.20
  -3  15  -6  891.31   44.80
   3  15   6  923.21   47.50
  -5 -15  -6  316.37   28.80
  -5  15  -6  377.16   29.80
  -7 -15  -6  169.78   19.70
  -7  15  -6  143.39   27.00
  -9 -15  -6   80.09   18.70
  -9  15  -6   73.09   21.60
 -11 -15  -6  207.98   23.50
 -11  15  -6  220.18   26.00
 -13 -15  -6   45.30   22.60
 -13  15  -6   21.90   25.50
 -15 -15  -6   72.89   25.00
 -15  15  -6   38.20   27.80
 -17 -15  -6   35.50   27.00
 -17  15  -6   25.10   31.30
 -19 -15  -6   98.99   30.30
 -19  15  -6   20.20   33.20
 -21 -15  -6   13.40   33.60
 -21  15  -6   20.40   35.70
 -22 -16   6   26.50   30.60
 -22  16   6    7.90   37.00
 -20 -16   6  -15.60   25.30
 -20  16   6   35.30   34.20
 -18 -16   6    2.30   20.80
 -18  16   6   55.69   32.10
 -16 -16   6  -21.20   18.00
 -16 -16   6  -85.79   48.60
 -16  16   6    2.90   28.00
 -14 -16   6  -62.69   39.40
 -14 -16   6    4.40   15.30
 -14  16   6    1.00   25.90
 -12 -16   6   31.10   40.10
 -12  16   6   23.20   25.20
 -10 -16   6   83.49   43.90
 -10  16   6    4.90   24.50
  10  16  -6    3.30   14.70
  -8 -16   6  126.59   43.90
  -8  16   6   20.90   23.60
   8  16  -6   59.49   14.90
  -6 -16   6  131.49   42.90
   6  16  -6   23.00   14.40
  -6  16   6   39.40   22.40
  -4 -16   6  237.68   67.09
  -4  16   6   45.70   21.10
   4  16  -6   44.50   14.90
   2  16  -6  154.18   17.40
   0  16   6  217.08   27.80
   0  16  -6  234.48   22.50
  -4  16  -6    2.90   16.70
  -6 -16  -6   36.90   17.60
  -6  16  -6   17.60   21.00
  -8 -16  -6   52.99   19.10
  -8  16  -6   53.59   20.70
 -10 -16  -6   81.39   20.70
 -10  16  -6   53.19   23.10
 -12 -16  -6   56.29   21.80
 -12  16  -6   56.09   25.30
 -14 -16  -6  162.08   26.40
 -14  16  -6  166.08   30.10
 -16 -16  -6   -3.50   26.80
 -16  16  -6   38.10   30.40
 -18 -16  -6  111.49   34.30
 -18  16  -6  134.39   33.80
 -20 -16  -6  109.99   38.50
 -20  16  -6  108.09   36.40
 -21 -17   6   52.29   28.40
 -21  17   6  133.79   42.10
 -19  17   6   25.80   33.80
 -17 -17   6   16.80   20.00
 -17  17   6   75.69   32.40
 -15 -17   6   25.20   17.50
 -15 -17   6  -70.69   44.60
 -15  17   6   29.60   28.10
 -13 -17   6   -9.50   49.60
 -13  17   6   21.70   28.00
 -11 -17   6   56.79   43.90
  11  17  -6   17.50   16.30
 -11  17   6    2.60   25.40
  -9 -17   6  138.89   43.50
  -9  17   6   90.39   26.40
   9  17  -6   47.10   15.80
   7  17  -6  172.18   17.30
  -7  17   6  147.99   25.20
  -5 -17   6  891.71   71.69
  -5  17   6  859.81   49.10
   5  17  -6  873.61   43.60
  -3 -17   6 1027.40   73.99
  -3  17   6 1056.19   54.39
   3  17  -6 1030.70   49.80
  -3  17  -6  322.07   25.20
   3  17   6  304.27   29.70
  -5  17  -6  358.76   31.60
  -7 -17  -6   22.00   21.50
  -7  17  -6   23.20   23.20
  -9 -17  -6    9.60   19.60
  -9  17  -6   33.20   22.90
 -11 -17  -6   -1.10   24.30
 -11  17  -6   26.20   24.20
 -13 -17  -6   -5.90   26.80
 -13  17  -6  -13.80   25.40
 -15 -17  -6    3.00   26.10
 -15  17  -6   21.80   28.90
 -17 -17  -6   13.60   31.60
 -17  17  -6   10.30   32.20
 -19 -17  -6  -13.70   32.10
 -19  17  -6   10.50   35.30
 -21 -17  -6   41.10   35.70
 -21  17  -6   80.59   38.30
 -20 -18   6   40.30   26.90
 -20  18   6   64.89   37.90
 -18 -18   6    3.20   25.90
 -18  18   6   24.10   33.50
 -16 -18   6    3.30   19.40
 -16  18   6   15.00   30.70
 -14 -18   6   36.60   58.19
 -14  18   6    4.30   29.30
 -12 -18   6   48.20   55.49
  12  18  -6   -8.70   18.90
 -12  18   6   10.40   29.20
 -10 -18   6  128.89   49.40
 -10  18   6   38.00   26.40
  10  18  -6   56.09   17.20
  -8 -18   6  182.68   48.50
   8  18  -6    4.30   17.10
  -8  18   6    9.00   24.90
  -6  18   6   57.29   19.90
  -4  18   6   81.09   19.90
   2  18  -6  234.28   23.80
  -2  18   6  274.77   27.30
   0  18  -6  255.17   25.30
   0  18   6  256.27   26.70
   2  18   6  176.38   25.40
  -2  18  -6  191.88   20.20
   4  18   6   47.70   21.70
  -4  18  -6   26.00   20.60
  -6  18  -6   85.29   21.30
  -8 -18  -6   55.79   20.50
  -8  18  -6   88.89   25.90
 -10 -18  -6   45.00   24.50
 -10  18  -6   64.99   25.50
 -12 -18  -6   -0.20   23.40
 -12  18  -6   12.00   25.80
 -14 -18  -6   52.09   29.10
 -14  18  -6   50.79   28.90
 -16 -18  -6   -1.90   30.80
 -16  18  -6   45.00   31.00
 -18 -18  -6  140.99   32.70
 -18  18  -6  175.88   38.60
 -20 -18  -6    1.20   38.90
 -20  18  -6   42.60   38.40
 -19 -19   6   14.60   26.20
 -19  19   6   21.90   36.80
 -17  19   6   48.10   34.10
 -15  19   6    4.40   31.20
 -13 -19   6   45.70   62.79
  13  19  -6  130.19   21.80
 -13  19   6  140.39   31.10
 -11 -19   6  270.37   64.69
 -11  19   6  114.19   30.10
  11  19  -6  168.18   21.00
   9  19  -6  158.98   19.80
  -9  19   6  156.98   30.00
  -7  19   6  117.49   27.20
   7  19  -6  149.59   19.30
  -3  19   6   91.69   25.50
  -1  19  -6  587.54   37.30
   1  19   6  618.24   36.60
   3  19   6  478.85   36.80
  -3  19  -6  484.65   31.90
   5  19   6  506.55   36.70
  -5  19  -6  479.05   33.70
  -7  19  -6   42.50   23.10
  -9 -19  -6  119.59   22.70
  -9  19  -6   63.69   24.60
 -11 -19  -6   14.60   23.00
 -11  19  -6   -3.30   26.00
 -13 -19  -6   12.90   24.70
 -13  19  -6   29.10   28.60
 -15 -19  -6   -6.00   30.90
 -15  19  -6  -25.10   31.50
 -17 -19  -6   65.69   35.00
 -17  19  -6   77.89   34.90
 -19 -19  -6  -22.70   33.80
 -19  19  -6   -0.20   37.10
 -20 -20   6  -40.80   29.30
 -20  20   6   38.30   40.40
 -18  20   6   19.00   37.50
 -16  20   6   -1.00   33.00
 -14  20   6   -5.20   33.10
  14  20  -6   46.60   21.50
 -12 -20   6   69.49   67.49
 -12  20   6   58.79   30.40
  12  20  -6   69.79   21.50
 -10 -20   6  188.78   60.59
 -10  20   6   14.20   28.70
  10  20  -6    2.90   20.30
  -8  20   6   83.79   28.60
   4  20  -6  513.45   33.30
  -4  20   6  578.24   41.80
   0  20  -6  527.35   35.10
   0  20   6  515.25   39.60
  -2  20  -6  109.59   22.50
   2  20   6  127.39   26.30
  -4  20  -6   40.50   22.80
   4  20   6   51.19   25.80
  -6  20  -6  -12.00   24.50
   6  20   6    4.10   24.40
  -8  20  -6   -0.50   24.20
 -10 -20  -6  297.07   28.40
 -10  20  -6  317.67   31.50
 -12 -20  -6  179.58   29.50
 -12  20  -6  178.08   30.90
 -14 -20  -6  107.59   27.50
 -14  20  -6  104.49   31.60
 -16 -20  -6   15.50   33.90
 -16  20  -6   51.89   34.10
 -18 -20  -6    2.20   33.80
 -18  20  -6   48.10   36.00
 -19  21   6  106.39   38.60
 -17  21   6   19.60   36.60
 -15  21   6   29.70   33.50
  15  21  -6   30.80   24.10
 -13 -21   6 -119.29   74.39
  13  21  -6   18.10   21.90
 -13  21   6   56.29   33.80
 -11 -21   6  326.57   77.59
  11  21  -6  270.37   25.20
 -11  21   6  254.67   35.90
  -9  21   6   43.50   30.50
   9  21  -6   38.00   20.40
   1  21  -6   92.49   21.10
  -1  21   6   97.29   27.70
   1  21   6   29.20   26.30
  -1  21  -6   25.60   22.00
   3  21   6  382.26   35.60
  -3  21  -6  302.77   30.00
   5  21   6   57.59   26.60
  -5  21  -6   17.60   21.70
   7  21   6   15.50   25.40
  -7  21  -6    6.40   24.20
  -9  21  -6   -8.40   30.00
 -11 -21  -6  158.68   27.10
 -11  21  -6  117.69   30.40
 -13 -21  -6    6.20   26.70
 -13  21  -6    9.30   30.30
 -15 -21  -6  -25.80   32.50
 -15  21  -6   31.60   33.20
 -17 -21  -6   80.39   33.50
 -17  21  -6   88.69   36.10
  18  22  -6  -16.10   26.00
 -18  22   6   64.59   40.60
 -16  22   6   30.60   36.40
  16  22  -6   -8.70   24.60
  14  22  -6  266.07   28.10
 -14  22   6  267.17   40.50
 -12 -22   6  220.48   85.79
 -12  22   6  370.06   36.30
  12  22  -6  328.17   32.20
 -10 -22   6  136.19   71.09
  10  22  -6   22.20   21.90
 -10  22   6   44.10   33.10
  -8 -22   6  321.27   81.99
  -8  22   6   -2.70   31.60
   8  22  -6   26.40   22.00
  -4  22   6  374.06   36.70
   4  22  -6  346.27   31.00
  -2  22   6  120.79   30.20
   2  22  -6   93.69   22.60
   0  22   6   20.60   27.90
   0  22  -6   69.59   24.30
  -2  22  -6   33.90   21.30
   2  22   6    5.70   26.80
   4  22   6   64.79   27.60
  -4  22  -6   40.70   23.10
   6  22   6   94.39   27.00
  -6  22  -6   30.10   24.30
   8  22   6   49.60   31.00
  -8  22  -6   51.29   26.30
 -10  22  -6   76.29   29.10
 -12 -22  -6  107.89   31.20
 -12  22  -6   97.89   32.10
 -14 -22  -6  -38.10   29.10
 -14  22  -6   18.40   32.20
 -16 -22  -6  -18.60   35.80
 -16  22  -6   30.80   34.50
 -18 -22  -6   66.39   35.80
 -18  22  -6   88.69   38.10
 -17  23   6  146.29   42.10
  17  23  -6  132.39   32.10
  15  23  -6   43.60   24.50
 -15  23   6    5.70   38.10
  13  23  -6   23.90   24.10
 -13  23   6   62.39   36.30
 -11 -23   6   94.09   78.59
 -11  23   6  186.58   36.70
  11  23  -6  165.88   25.70
  -9 -23   6  197.78   86.29
   9  23  -6   43.40   23.80
  -9  23   6   82.09   33.60
  -7  23   6   66.09   33.20
   3  23  -6   26.00   22.50
  -3  23   6   -4.40   30.60
  -1  23   6    8.00   29.60
   1  23  -6  -10.60   37.10
   1  23   6  -13.80   27.50
  -1  23  -6   10.10   24.50
  -3  23  -6   -1.30   22.80
   3  23   6   24.10   28.20
   5  23   6   26.10   28.00
  -5  23  -6   26.40   24.10
  -7  23  -6   -2.80   25.80
   7  23   6   21.00   28.40
  -9  23  -6  126.59   29.00
   9  23   6  168.28   34.30
 -11  23  -6  131.49   32.10
 -13 -23  -6   15.30   29.90
 -13  23  -6   99.79   34.40
 -15 -23  -6   -5.10   35.80
 -15  23  -6   74.19   35.50
 -17 -23  -6   95.19   34.90
 -17  23  -6   91.19   38.50
  16  24  -6  -16.30   39.30
 -16  24   6   23.50   40.80
  14  24  -6   78.89   27.50
 -14  24   6   81.59   38.90
 -12  24   6  141.09   36.90
  12  24  -6   96.89   25.70
 -10 -24   6  -99.09   93.39
  10  24  -6    2.20   25.10
 -10  24   6   16.10   34.80
  -8 -24   6  308.67   93.29
   8  24  -6   20.80   24.80
  -8  24   6   35.40   34.30
   4  24  -6   54.59   25.70
  -4  24   6   95.19   33.10
  -2  24   6  536.75   45.80
   2  24  -6  505.35   44.40
   0  24   6  267.77   34.70
   0  24  -6  212.58   28.20
   2  24   6   54.99   29.50
  -2  24  -6   64.29   24.60
   4  24   6  185.68   32.20
  -4  24  -6  166.18   26.50
  -6  24  -6   89.89   27.50
   6  24   6  128.99   31.50
  -8  24  -6   90.39   28.60
   8  24   6   46.50   30.60
  10  24   6   33.90   30.90
 -10  24  -6   23.20   31.50
 -12  24  -6   44.80   33.50
 -14  24  -6   18.90   35.80
 -16 -24  -6   19.20   40.00
 -16  24  -6   47.40   38.40
 -15  25   6   62.09   41.60
  15  25  -6   40.50   31.70
 -13  25   6   48.50   39.70
  11  25  -6   42.20   27.00
 -11  25   6   61.39   38.10
  -9 -25   6  -67.89  102.29
   9  25  -6    3.60   26.50
  -9  25   6   41.80   36.60
  -7 -25   6  346.87   90.39
  -7  25   6   91.09   37.50
   7  25  -6  126.19   28.60
  -5  25   6  259.57   37.80
   3  25  -6    8.10   25.20
  -3  25   6   24.50   33.60
  -1  25   6   20.40   32.80
   1  25  -6   24.20   23.50
  -1  25  -6   -3.10   24.50
   1  25   6   29.40   31.80
  -3  25  -6   14.00   25.60
   3  25   6   27.00   35.00
  -5  25  -6   38.40   30.50
   5  25   6   22.50   31.10
  -7  25  -6   56.69   29.90
   7  25   6   49.00   35.70
   9  25   6   29.70   32.70
  -9  25  -6   32.40   30.30
 -11  25  -6   27.70   33.20
  11  25   6   19.90   32.70
 -13  25  -6   79.79   36.40
 -15  25  -6   30.60   37.60
  14  26  -6  -17.30   27.70
 -14  26   6   19.70   43.40
  12  26  -6   37.90   32.70
 -12  26   6   26.10   40.70
  10  26  -6   21.10   46.00
 -10  26   6   45.80   39.80
  -8  26   6   64.49   37.90
   8  26  -6   91.89   34.40
   6  26  -6  105.49   28.40
  -6  26   6   70.29   37.60
  -4  26   6    6.30   36.00
   4  26  -6   16.50   26.70
   2  26  -6   42.10   28.50
  -2  26   6   40.00   34.20
   0  26   6   31.90   34.50
   0  26  -6   33.60   29.00
   2  26   6  -38.70   33.00
  -2  26  -6   -1.60   26.30
   4  26   6   32.60   32.60
  -4  26  -6   35.90   27.40
  -6  26  -6  401.86   40.50
   6  26   6  427.56   39.80
  -8  26  -6  178.68   37.20
   8  26   6  131.59   38.70
  10  26   6   58.69   34.40
 -10  26  -6   58.89   37.50
  12  26   6  -22.70   38.50
 -12  26  -6   30.50   35.20
 -14  26  -6   68.59   42.70
 -13  27   6   -4.90   43.20
  13  27  -6    2.30   30.90
  11  27  -6  -12.70   29.50
 -11  27   6   43.80   42.70
  -9  27   6   70.69   42.10
   9  27  -6   68.19   29.80
  -7  27   6  106.39   40.10
   7  27  -6   17.30   29.10
  -5  27   6  235.58   39.80
   5  27  -6  208.28   30.30
   3  27  -6  260.57   32.00
  -3  27   6  312.47   40.60
  -1  27   6  371.36   41.80
   1  27  -6  347.57   35.00
  -1  27  -6  178.28   33.10
   1  27   6  160.68   37.80
  -3  27  -6   -6.00   27.90
   3  27   6   20.30   35.40
  -5  27  -6    0.00   33.20
   5  27   6   -6.40   32.50
  -7  27  -6   42.90   31.40
   7  27   6   50.29   33.60
  -9  27  -6   11.20   34.60
   9  27   6  -23.80   39.20
 -11  27  -6   47.00   35.90
  11  27   6   45.80   40.40
 -13  27  -6   62.79   38.30
  13  27   6    9.50   37.50
 -12  28   6   33.20   44.50
  12  28  -6   19.50   31.70
 -10  28   6  -21.50   42.50
  10  28  -6    3.30   30.50
  -8  28   6  139.79   42.60
   8  28  -6  116.59   29.80
   6  28  -6  228.38   31.80
  -6  28   6  137.29   41.80
   4  28  -6  169.98   33.10
  -4  28   6  171.28   40.30
  -2  28   6   54.49   39.00
   2  28  -6   66.29   30.90
   0  28  -6   -4.50   31.90
   0  28   6  -20.10   37.50
  -2  28  -6   -0.60   33.60
   2  28   6   -7.50   36.20
  -4  28  -6   39.50   30.20
   4  28   6   -4.90   39.80
  -6  28  -6  116.49   33.20
   6  28   6  116.09   36.90
  -8  28  -6  116.89   39.10
   8  28   6   90.79   41.10
  10  28   6  103.79   42.30
 -10  28  -6  147.39   41.20
 -12  28  -6   59.79   38.20
  12  28   6   19.90   39.10
  11  29  -6   -0.50   32.30
 -11  29   6   10.30   45.30
   9  29  -6   58.69   34.20
  -9  29   6   40.30   44.20
   7  29  -6  115.69   31.30
  -7  29   6  187.18   45.60
  -5  29   6   90.99   42.80
   5  29  -6   78.59   33.30
  -3  29   6  125.69   42.40
   3  29  -6   77.79   33.00
  -1  29   6  231.98   43.40
   1  29  -6  257.37   32.20
   1  29   6   67.59   39.10
  -1  29  -6   70.89   34.30
   3  29   6   25.50   42.30
  -3  29  -6   26.40   35.40
   5  29   6   18.00   37.70
  -5  29  -6    9.30   31.40
  -7  29  -6   48.20   34.70
   7  29   6  -10.20   35.80
   9  29   6   14.90   41.50
  -9  29  -6   23.50   36.50
   8  30  -6   -1.60   33.70
  -8  30   6    9.80   44.50
  -6  30   6   31.90   43.30
   6  30  -6   39.10   32.00
   4  30  -6   55.19   34.10
  -4  30   6  108.79   42.60
  -2  30   6   58.19   43.30
   2  30  -6   69.49   33.70
   0  30  -6   42.50   34.10
   0  30   6   55.09   41.40
  -2  30  -6   -5.60   36.30
   2  30   6  -15.00   43.80
   4  30   6   15.80   39.90
  -4  30  -6    2.50   37.80
  -6  30  -6   16.30   38.90
   6  30   6   36.70   38.30
  -8  30  -6   34.50   42.00
   8  30   6    2.50   43.50
  -7  31   6  -46.50   45.90
   7  31  -6    1.00   35.30
  -5  31   6   92.09   45.40
   5  31  -6   70.69   36.70
   3  31  -6   93.29   37.80
  -3  31   6   95.39   44.30
  -1  31   6  152.88   46.80
   1  31  -6  189.18   37.00
  -1  31  -6   20.30   36.80
   1  31   6  -19.00   46.40
  -3  31  -6   -2.60   38.50
   3  31   6   46.90   41.90
  -5  31  -6   47.80   39.20
   5  31   6   48.00   40.40
   7  31   6   -5.20   45.70
  -7  31  -6    6.20   37.80
  -4  32   6    1.00   46.50
   4  32  -6  -15.40   35.90
   2  32  -6   51.89   37.00
  -2  32   6   45.70   45.60
   0  32  -6   -9.10   38.70
   0  32   6    0.40   43.20
  -2  32  -6   69.79   40.10
   2  32   6   12.20   44.40
 -24   0   7   66.29   25.70
 -22   0   7   43.90   22.60
 -20   0   7   -3.80   21.40
 -18   0   7   -2.60   19.80
 -16   0   7    4.60   17.40
 -14   0   7   -4.00   15.20
 -12   0   7    2.80   13.10
 -10   0   7    4.00   11.90
  -4   0   7  -19.30    6.90
   2   0  -7   -0.10    6.80
   0   0  -7   -8.20    7.60
   2   0   7    9.50   13.50
  -2   0  -7    0.80    8.70
  -4   0  -7    1.80   10.60
   4   0   7   11.00   12.20
  -8   0  -7   88.89   15.10
 -10   0  -7    5.30   15.20
 -12   0  -7   -4.20   18.10
 -14   0  -7    9.30   19.80
 -16   0  -7   14.40   21.10
 -18   0  -7   45.50   24.80
 -20   0  -7   27.50   26.70
 -22   0  -7  -18.70   29.80
 -24   0  -7    7.50   33.50
 -25  -1   7   35.40   47.50
 -25  -1   7   17.90   30.80
 -25   1   7   14.40   31.20
 -23  -1   7   21.30   26.20
 -23   1   7    8.20   27.40
 -21  -1   7   48.10   20.60
 -21   1   7   41.00   21.70
 -19  -1   7   24.70   20.20
 -19   1   7   26.60   22.20
 -17  -1   7   70.89   18.40
 -17   1   7   42.30   31.10
 -15  -1   7   14.00   15.20
 -15   1   7    4.60   17.20
 -13  -1   7  146.09   15.80
 -13   1   7  146.39   17.20
 -11  -1   7   64.39   12.50
 -11   1   7   60.59   13.80
  -9  -1   7  194.28   14.60
  -9   1   7  191.48   17.60
  -7  -1   7  232.98   15.80
  -7   1   7  256.77   17.20
  -5  -1   7 1130.69   49.60
  -5   1   7 1105.99   49.99
  -3  -1   7   -1.30    6.50
  -3   1   7   10.70    8.00
   1  -1  -7 1681.03   74.39
   1   1  -7 1714.63   74.09
  -1  -1  -7  193.38   13.50
  -1   1  -7  182.78   12.60
   3  -1   7  634.94   37.50
  -3  -1  -7  636.84   31.50
  -3   1  -7  644.44   31.30
   3   1   7  705.13   37.30
   5  -1   7  127.49   19.60
  -5   1  -7   86.39   12.60
  -7  -1  -7   69.99   14.40
  -7   1  -7   68.39   14.20
  -9   1  -7  112.69   16.40
 -11  -1  -7   70.59   17.30
 -11   1  -7   85.79   16.90
 -13  -1  -7   17.20   17.90
 -13   1  -7   15.90   14.10
 -15  -1  -7  117.89   21.50
 -15   1  -7   95.99   22.50
 -17  -1  -7   10.20   23.30
 -17   1  -7    5.40   23.40
 -19  -1  -7   64.19   25.80
 -19   1  -7   34.00   26.90
 -21  -1  -7   17.80   27.90
 -21   1  -7    9.70   28.50
 -23  -1  -7   51.79   32.50
 -23   1  -7   35.30   33.50
 -24  -2   7   10.40   43.50
 -24  -2   7   31.70   28.40
 -24   2   7   32.80   26.40
 -22  -2   7   51.09   24.40
 -22   2   7   27.70   26.10
 -20  -2   7   36.50   21.40
 -20   2   7   21.10   21.00
 -18   2   7  154.78   23.20
 -16  -2   7   91.69   17.30
 -16   2   7   94.79   17.80
 -14  -2   7  105.29   16.40
 -14   2   7  106.19   16.10
 -12  -2   7   11.30   12.40
 -12   2   7   -1.80   14.70
 -10  -2   7    2.70   10.80
 -10   2   7   18.20   12.00
  -8  -2   7 1186.08   54.69
  -8   2   7 1272.37   56.19
  -4  -2   7  111.29    7.80
  -4   2   7   97.39   10.90
  -2  -2   7  724.03   44.00
   2   2  -7  741.13   32.70
   0  -2  -7  336.57   17.70
   0  -2   7  291.97   28.20
   0   2  -7  322.07   16.70
  -2  -2  -7   70.79   10.20
   2  -2   7   42.70   13.80
  -2   2  -7   81.29   10.10
   4  -2   7  147.09   23.20
  -4  -2  -7  186.98   15.80
  -4   2  -7  199.58   15.30
   6   2   7  304.57   19.60
  -8  -2  -7  517.35   29.90
  -8   2  -7  536.95   30.20
 -10  -2  -7    9.80   15.40
 -10   2  -7    9.30   15.30
 -12  -2  -7   90.89   18.40
 -12   2  -7   91.49   18.80
 -14  -2  -7   15.20   18.40
 -14   2  -7   18.10   18.70
 -16  -2  -7  175.18   24.70
 -16   2  -7  230.58   22.20
 -18  -2  -7  -20.50   23.20
 -18   2  -7    9.60   24.10
 -20  -2  -7   12.10   27.10
 -20   2  -7    6.90   28.20
 -22  -2  -7   21.90   30.30
 -22   2  -7    5.90   34.50
 -24  -2  -7   28.00   34.00
 -24   2  -7  -36.20   35.30
 -25  -3   7   46.70   29.70
 -25  -3   7   75.29   47.60
 -25   3   7   55.19   31.60
 -23  -3   7   27.60   41.60
 -23  -3   7   20.50   26.40
 -23   3   7   22.10   28.80
 -21  -3   7   67.59   39.60
 -21  -3   7   67.29   23.40
 -21   3   7   62.59   23.00
 -19  -3   7   28.80   20.00
 -19   3   7   17.40   20.70
 -17  -3   7   90.49   18.10
 -17   3   7  109.29   19.00
 -15  -3   7   49.50   15.30
 -15   3   7   44.10   17.00
 -13  -3   7   59.99   13.70
 -13   3   7   72.49   17.70
 -11  -3   7   17.70   11.10
 -11   3   7   10.90   13.10
  -9  -3   7 1345.57   60.49
  -9   3   7 1367.86   62.29
  -7  -3   7 1839.02   80.49
  -7   3   7 1851.21   82.09
  -5  -3   7   29.90   22.80
  -5   3   7   72.69   11.40
  -3  -3   7   -1.20   18.20
  -3  -3   7    2.50    4.50
  -3   3   7    2.60    9.00
   1  -3  -7  844.22   38.20
  -1  -3   7  800.22   47.10
   1   3  -7  854.61   37.20
   1  -3   7  411.86   30.20
  -1  -3  -7  410.66   21.80
  -1   3  -7  415.36   21.10
   3  -3   7   69.49   15.60
  -3  -3  -7  100.09   11.60
  -3   3  -7   91.09   10.70
  -5  -3  -7 1746.73   77.19
   5  -3   7 1681.43   80.89
  -5   3  -7 1764.32   77.19
  -7  -3  -7  258.67   20.90
  -7   3  -7  254.27   21.30
  -9  -3  -7  281.07   22.30
  -9   3  -7  272.37   22.90
 -11  -3  -7   79.69   17.00
 -11   3  -7   89.19   18.10
 -13  -3  -7  102.09   19.10
 -13   3  -7   91.49   19.90
 -15  -3  -7  382.86   31.30
 -15   3  -7  394.96   32.80
 -17  -3  -7   82.49   23.70
 -17   3  -7   72.79   24.60
 -19  -3  -7  168.48   26.70
 -19   3  -7  151.78   28.60
 -21  -3  -7   74.99   28.30
 -21   3  -7   63.49   30.60
 -23  -3  -7   37.70   31.70
 -23   3  -7   54.69   34.10
 -24  -4   7   18.90   28.50
 -24  -4   7   27.90   43.30
 -24   4   7   24.30   30.20
 -22  -4   7   71.79   41.40
 -22  -4   7   25.50   24.60
 -22   4   7   56.39   28.00
 -20  -4   7  165.48   40.70
 -20  -4   7  190.18   23.60
 -20   4   7  198.08   25.00
 -18  -4   7   20.70   19.80
 -18  -4   7   10.80   34.00
 -18   4   7   41.20   19.90
 -16  -4   7   11.20   16.60
 -16   4   7   -2.60   17.70
 -14  -4   7   -3.30   25.70
 -14  -4   7   -1.70   14.30
 -14   4   7  -11.30   15.90
 -12  -4   7  257.87   19.70
 -12  -4   7  240.08   39.20
 -12   4   7  268.77   21.60
 -10  -4   7   13.80    9.50
 -10  -4   7  -17.10   23.40
 -10   4   7   17.80   14.90
  -8  -4   7  180.88   13.50
  -8  -4   7  179.38   30.30
  -8   4   7  265.37   18.30
  -6  -4   7 1168.68   66.09
  -6  -4   7 1251.77   53.19
  -6   4   7 1233.28   55.49
  -4  -4   7 1166.88   61.69
  -4   4   7 1138.29   52.19
  -2  -4   7  964.60   53.29
  -2   4   7  940.31   44.00
   2   4  -7  965.10   41.80
   0  -4   7  291.77   29.30
   0  -4  -7  298.87   17.80
   0   4  -7  287.67   16.00
  -2   4  -7  106.19   11.10
  -4  -4  -7  125.59   13.20
  -4   4  -7  117.29   12.90
  -8  -4  -7   32.90   14.50
  -8   4  -7   52.39   15.70
 -10  -4  -7    1.30   15.00
 -10   4  -7  -17.60   16.10
 -12  -4  -7   16.90   16.60
 -12   4  -7   20.50   17.80
 -14  -4  -7   -3.70   14.80
 -14   4  -7    6.00   19.70
 -16  -4  -7   -8.20   21.20
 -16   4  -7    5.00   22.20
 -18  -4  -7   -2.00   23.60
 -18   4  -7  -21.40   24.70
 -20  -4  -7   10.20   26.30
 -20   4  -7   27.70   28.20
 -22  -4  -7   57.29   33.40
 -22   4  -7   33.40   35.40
 -24  -4  -7   17.10   37.20
 -24   4  -7   44.90   35.40
 -25  -5   7   20.30   44.00
 -25  -5   7    7.00   31.10
 -25   5   7    3.70   32.90
 -23  -5   7   40.40   44.50
 -23  -5   7   15.00   27.60
 -23   5   7   27.60   26.00
 -21  -5   7   45.00   38.30
 -21  -5   7   22.70   25.80
 -21   5   7   49.40   24.90
 -19  -5   7  148.39   37.10
 -19  -5   7  143.19   39.50
 -19   5   7  152.18   23.70
 -17  -5   7  180.98   37.40
 -17  -5   7  211.28   20.30
 -17   5   7  189.28   25.10
 -15  -5   7   39.50   31.40
 -15  -5   7   43.30   15.00
 -15   5   7   43.00   26.20
 -13  -5   7   63.09   29.70
 -13  -5   7   89.59   12.90
 -13   5   7   71.39   16.50
 -11  -5   7  376.66   21.10
 -11  -5   7  345.97   46.70
 -11   5   7  350.26   24.70
  -9  -5   7  743.03   52.89
  -9  -5   7  819.42   36.20
  -9   5   7  789.32   39.30
  -7  -5   7   17.30   23.20
  -7  -5   7   54.99    6.30
  -7   5   7   69.29   13.40
  -5  -5   7  413.36   38.60
  -5   5   7  451.15   24.50
  -3  -5   7  462.95   38.80
  -3   5   7  491.45   25.50
  -1  -5   7   17.70   18.60
   1   5  -7   12.10    5.80
   1  -5   7   32.70   17.00
  -1  -5  -7   23.60   10.40
  -1   5  -7   22.70    8.60
  -3  -5  -7   75.39   12.10
  -3   5  -7   69.49   10.80
  -7  -5  -7 1127.89   53.69
  -7   5  -7 1152.78   53.89
  -9  -5  -7   -3.40   14.40
  -9   5  -7  -19.80   15.70
 -11  -5  -7   13.80   19.10
 -13  -5  -7   52.29   17.80
 -13   5  -7   30.50   20.00
 -15  -5  -7   49.20   20.10
 -15   5  -7   32.50   22.50
 -17  -5  -7   77.89   23.30
 -17   5  -7   79.79   26.00
 -19  -5  -7   67.19   28.20
 -19   5  -7   65.09   27.30
 -21  -5  -7   64.09   28.90
 -21   5  -7   28.70   30.10
 -23  -5  -7   18.40   31.00
 -23   5  -7   78.89   34.70
 -24  -6   7    4.10   27.50
 -24  -6   7   -5.10   46.20
 -24   6   7   42.30   29.00
 -22  -6   7   16.70   43.30
 -22  -6   7   40.90   26.40
 -22   6   7   15.70   27.20
 -20  -6   7   28.70   38.00
 -20  -6   7   18.30   22.00
 -20   6   7   26.50   23.60
 -18  -6   7  118.49   36.60
 -18  -6   7  177.18   20.80
 -18   6   7  123.19   23.30
 -16  -6   7    9.30   39.40
 -16  -6   7   35.70   16.70
 -16   6   7    0.70   19.90
 -14  -6   7   61.39   14.40
 -14  -6   7   36.10   30.60
 -14   6   7   35.50   28.70
 -12  -6   7   17.00   11.50
 -12  -6   7   15.40   25.30
 -12   6   7   32.50   17.90
 -10  -6   7   85.19   10.20
 -10  -6   7   59.69   25.40
 -10   6   7   80.39   15.50
  -8  -6   7  368.36   18.30
  -8  -6   7  346.07   40.40
  -8   6   7  371.66   26.80
  -6  -6   7 2461.75  118.39
  -6   6   7 2428.66  107.99
  -4  -6   7 1828.32   91.69
  -4   6   7 1815.52   81.19
  -2  -6   7   89.49   21.90
  -2   6   7  109.89   13.70
   2   6  -7   90.89    7.70
   0  -6   7  714.63   45.70
   0  -6  -7  809.62   36.70
   0   6  -7  774.72   34.90
  -2  -6  -7   26.30   11.20
   2  -6   7   62.69   18.70
  -2   6  -7   36.60   10.90
  -4  -6  -7  331.97   18.90
  -4   6  -7  277.97   22.10
  -8  -6  -7   39.10   14.90
  -8   6  -7   43.50   16.30
 -10  -6  -7  143.39   17.90
 -10   6  -7  127.39   16.10
 -12  -6  -7   16.60   17.10
 -12   6  -7   29.10   19.60
 -14  -6  -7   21.80   19.60
 -14   6  -7   -7.50   20.50
 -16  -6  -7  -11.00   21.20
 -16   6  -7  -21.10   23.40
 -18  -6  -7   29.10   23.90
 -18   6  -7   18.00   27.70
 -20  -6  -7   46.30   26.90
 -20   6  -7   31.70   29.20
 -22  -6  -7  189.98   32.70
 -22   6  -7  174.88   35.20
 -24  -6  -7   42.10   34.40
 -24   6  -7   51.39   35.90
 -23  -7   7   91.89   26.30
 -23  -7   7   46.10   44.00
 -23   7   7   60.89   32.90
 -21  -7   7   37.00   42.20
 -21  -7   7   49.60   23.50
 -21   7   7   30.20   25.60
 -19  -7   7  106.49   21.70
 -19  -7   7   53.49   38.60
 -19   7   7   54.39   27.00
 -17  -7   7   37.70   35.40
 -17  -7   7   15.80   18.50
 -17   7   7   23.40   22.00
 -15  -7   7   55.09   51.49
 -15  -7   7   78.29   16.00
 -15   7   7   56.39   20.30
 -13  -7   7   16.10   12.30
 -13  -7   7    6.50   29.70
 -13   7   7   23.20   18.00
 -11  -7   7  257.07   17.50
 -11  -7   7  242.38   40.90
 -11   7   7  260.67   26.30
  -9  -7   7  428.66   48.70
  -9  -7   7  431.26   21.10
  -9   7   7  389.16   27.00
  -7  -7   7  137.79   27.10
  -7  -7   7  154.18    8.80
  -7   7   7  180.88   19.10
  -5  -7   7  602.34   50.49
  -5   7   7  609.94   32.70
  -3  -7   7   23.60   22.00
   3   7  -7   36.50    4.30
  -3   7   7   31.40   13.30
  -1  -7   7  119.09   22.80
  -1   7   7  153.48   15.50
   1   7  -7  130.09   11.50
   1  -7   7   68.79   20.70
  -1  -7  -7   45.70    9.50
  -1   7  -7   42.40   10.40
  -7  -7  -7  843.92   40.50
  -7   7  -7  833.72   42.50
  -9  -7  -7   29.10   15.10
  -9   7  -7   13.50   17.10
 -11  -7  -7   51.99   14.50
 -11   7  -7   49.50   19.20
 -13  -7  -7   14.90   18.00
 -13   7  -7   -5.30   20.70
 -15  -7  -7    4.10   20.70
 -15   7  -7  -12.60   22.00
 -17  -7  -7   19.10   22.80
 -17   7  -7    0.70   25.60
 -19  -7  -7  272.37   33.40
 -19   7  -7  303.97   29.00
 -21  -7  -7   78.79   29.20
 -21   7  -7   95.39   31.50
 -23  -7  -7    2.30   32.60
 -23   7  -7   26.20   34.50
 -24  -8   7    6.60   49.10
 -24  -8   7   23.50   29.20
 -24   8   7   66.89   31.90
 -22  -8   7   66.99   25.10
 -22  -8   7   57.59   44.40
 -22   8   7   99.49   29.10
 -20  -8   7  100.69   22.70
 -20  -8   7   76.19   43.20
 -20   8   7   79.69   26.30
 -18  -8   7  179.78   42.00
 -18  -8   7  232.08   22.90
 -18   8   7  242.88   26.40
 -16  -8   7   21.20   16.30
 -16  -8   7   -1.90   34.00
 -16   8   7   17.70   21.70
 -14  -8   7    1.80   13.60
 -14  -8   7    9.80   32.10
 -14   8   7  -12.70   21.30
 -12  -8   7  177.48   31.30
 -12  -8   7  231.08   17.50
 -12   8   7  209.88   20.70
 -10  -8   7  372.76   48.80
 -10  -8   7  353.86   19.50
 -10   8   7  372.56   26.40
  -8  -8   7  291.37   45.70
  -8  -8   7  254.47   13.80
  -8   8   7  264.67   23.20
  -6  -8   7  115.29   26.60
  -6   8   7  140.59   17.60
  -4  -8   7  860.91   54.09
   4   8  -7  775.92   35.80
  -4   8   7  847.92   41.20
  -2  -8   7   27.10   24.80
  -2   8   7   10.30   11.40
   2   8  -7  -15.80    7.40
   0  -8   7  215.88   34.00
   0   8  -7  123.59   11.80
  -6   8  -7   76.39   16.00
  -8  -8  -7  297.27   23.30
  -8   8  -7  269.67   24.60
 -10  -8  -7   23.70   18.00
 -10   8  -7   16.20   20.30
 -12  -8  -7  194.58   21.40
 -12   8  -7  153.68   22.70
 -14  -8  -7   16.80   20.10
 -14   8  -7   -8.00   22.80
 -16  -8  -7  194.68   25.80
 -16   8  -7  219.48   28.00
 -18  -8  -7  -10.20   24.10
 -18   8  -7   -5.60   27.60
 -20  -8  -7   16.80   27.30
 -20   8  -7   45.30   31.10
 -22  -8  -7  126.19   32.90
 -22   8  -7  151.18   35.50
 -23  -9   7   92.59   29.40
 -23  -9   7   52.89   49.99
 -23   9   7   93.59   32.10
 -21  -9   7   43.30   25.10
 -21  -9   7   52.59   43.90
 -21   9   7   69.09   28.50
 -19  -9   7  108.59   22.30
 -19  -9   7   79.79   41.30
 -19   9   7  116.29   25.80
 -17  -9   7  151.28   39.50
 -17  -9   7  206.08   20.70
 -17   9   7  164.78   25.90
 -15  -9   7   -8.40   35.30
 -15  -9   7   17.00   15.50
 -15   9   7    9.40   21.40
 -13  -9   7  143.39   14.60
 -13  -9   7  104.69   30.60
 -13   9   7  130.19   20.50
 -11  -9   7   27.30    9.70
 -11  -9   7   20.30   27.00
 -11   9   7   17.70   18.00
  -9  -9   7   24.40    7.20
  -9  -9   7   29.60   26.00
  -9   9   7   29.20   16.50
  -7  -9   7 1318.97   75.39
   7   9  -7 1433.36   59.69
  -7   9   7 1322.07   63.69
  -5  -9   7   73.69   26.30
   5   9  -7   62.39    6.30
  -5   9   7   59.89   17.10
  -3   9   7    7.80   15.60
   3   9  -7    6.80    7.60
  -1   9   7  418.76   23.70
   1   9  -7  362.06   21.50
  -7  -9  -7  467.15   26.00
  -7   9  -7  446.46   29.10
  -9  -9  -7  186.08   19.50
  -9   9  -7  205.68   21.80
 -11  -9  -7  411.66   29.60
 -11   9  -7  448.36   31.70
 -13  -9  -7  205.68   22.40
 -13   9  -7  173.08   24.10
 -15  -9  -7    6.30   22.70
 -15   9  -7   30.30   23.30
 -17  -9  -7  164.98   26.90
 -17   9  -7  170.08   28.30
 -19  -9  -7  538.45   41.60
 -19   9  -7  495.35   44.40
 -21  -9  -7  132.29   31.10
 -21   9  -7  128.09   34.80
 -23  -9  -7   19.70   33.90
 -23   9  -7    4.30   36.60
 -24 -10   7   16.20   31.00
 -24 -10   7    5.10   47.40
 -24  10   7   41.00   37.20
 -22 -10   7   32.10   48.70
 -22 -10   7   37.20   27.20
 -22  10   7    3.50   29.50
 -20 -10   7  168.38   45.70
 -20  10   7  199.28   32.60
 -18 -10   7  689.33   71.39
 -18 -10   7  751.32   41.70
 -18  10   7  707.73   46.20
 -16 -10   7  395.36   28.10
 -16 -10   7  379.26   60.99
 -16  10   7  372.26   34.00
 -14 -10   7   86.19   42.80
 -14 -10   7   76.09   14.00
 -14  10   7  100.99   22.20
 -12 -10   7  397.86   53.49
 -12 -10   7  357.16   22.10
 -12  10   7  368.76   30.00
 -10 -10   7   88.89    9.20
 -10 -10   7   80.29   28.10
 -10  10   7  112.49   19.30
  -8 -10   7   67.49   27.20
  -8  10   7   87.69   18.20
  -6 -10   7  137.19   28.60
  -4  10   7  168.88   19.40
   4  10  -7  168.48   12.80
   2  10  -7   -8.60    9.50
  -2  10   7   36.90   16.60
  -2 -10  -7  544.65   32.20
  -2  10  -7  657.53   32.10
  -6 -10  -7   30.20   15.10
  -6  10  -7   10.00   15.50
  -8 -10  -7  142.39   18.30
  -8  10  -7  164.28   20.00
 -10 -10  -7  552.84   32.40
 -10  10  -7  520.15   34.20
 -12 -10  -7   10.20   18.90
 -12  10  -7    7.10   21.20
 -14 -10  -7  109.89   22.60
 -14  10  -7   70.09   24.80
 -16 -10  -7   31.00   23.70
 -16  10  -7   27.80   26.00
 -18 -10  -7   11.00   26.60
 -18  10  -7   12.20   26.70
 -20 -10  -7   20.60   28.40
 -20  10  -7   26.20   31.80
 -22 -10  -7   57.39   36.90
 -22  10  -7   77.99   37.10
 -23 -11   7  160.48   31.20
 -23 -11   7  102.99   52.69
 -23  11   7  163.18   37.20
 -21 -11   7  173.68   27.20
 -21 -11   7   93.99   49.99
 -21  11   7  160.58   35.40
 -19 -11   7  442.16   34.60
 -19 -11   7  417.66   75.59
 -19  11   7  431.96   39.20
 -17 -11   7   28.20   18.50
 -17 -11   7   34.00   41.00
 -17  11   7   21.20   24.80
 -15 -11   7   30.20   37.40
 -15 -11   7   20.40   15.50
 -15  11   7    4.00   25.60
 -13 -11   7   44.60   12.70
 -13  11   7   49.00   21.50
 -11 -11   7   19.80    9.80
 -11 -11   7   20.20   33.10
 -11  11   7   15.30   19.80
  -9 -11   7  578.54   51.29
  -9  11   7  570.64   35.20
  -7 -11   7 1164.48   71.39
  -7  11   7 1203.58   58.19
   7  11  -7 1253.27   53.79
  -5 -11   7 1058.79   65.29
  -5  11   7 1011.10   51.09
   5  11  -7 1026.80   46.10
   3  11  -7  591.24   29.00
  -3  11   7  587.64   34.50
  -1  11   7  739.23   37.30
   1  11  -7  737.83   35.80
  -5 -11  -7 1824.62   84.39
  -5  11  -7 1917.71   84.29
  -7 -11  -7 1135.59   55.09
  -7  11  -7 1175.38   55.79
  -9 -11  -7  327.67   29.90
 -11 -11  -7   44.30   18.60
 -11  11  -7    6.40   21.20
 -13 -11  -7   78.49   20.80
 -13  11  -7   48.50   23.50
 -15 -11  -7  144.29   24.20
 -15  11  -7   92.79   26.70
 -17 -11  -7  301.47   33.10
 -17  11  -7  277.47   32.70
 -19 -11  -7  220.88   31.30
 -19  11  -7  225.88   33.50
 -21 -11  -7  314.37   40.00
 -21  11  -7  307.77   38.10
 -23 -11  -7   91.89   40.00
 -23  11  -7  123.79   39.20
 -22 -12   7   70.39   26.70
 -22 -12   7  -24.60   52.49
 -22  12   7   70.19   35.90
 -20 -12   7  319.47   54.29
 -20  12   7  395.76   35.90
 -18 -12   7 1010.00   50.79
 -18 -12   7  968.20   82.89
 -18  12   7  956.70   56.19
 -16 -12   7  540.35   68.49
 -16 -12   7  552.24   33.30
 -16  12   7  573.64   40.80
 -14 -12   7  184.68   41.60
 -14 -12   7  204.58   18.90
 -14  12   7  185.28   25.90
 -12 -12   7   78.09   12.10
 -12 -12   7   47.60   52.59
 -12  12   7   99.59   22.40
 -10 -12   7  108.19   31.40
 -10  12   7  149.39   21.70
  -8 -12   7  199.88   35.80
   8  12  -7  216.98   16.00
  -8  12   7  219.88   23.10
  -6 -12   7  253.47   44.20
  -6  12   7  164.68   21.20
  -4 -12   7 2816.12  137.79
  -4  12   7 2927.21  128.39
   4  12  -7 2918.11  125.59
  -2  12  -7 1204.28   55.49
  -6 -12  -7   26.90   15.80
  -6  12  -7   -1.00   16.10
  -8  12  -7  183.28   21.10
 -10 -12  -7  192.68   21.00
 -10  12  -7  198.58   23.60
 -12 -12  -7   48.50   20.20
 -12  12  -7   15.50   22.80
 -14 -12  -7   14.70   22.60
 -14  12  -7   -0.60   24.70
 -16 -12  -7   35.30   24.70
 -16  12  -7   20.60   27.40
 -18 -12  -7   46.60   27.50
 -18  12  -7  114.69   30.30
 -20 -12  -7   55.69   29.60
 -20  12  -7   43.70   32.00
 -22 -12  -7   57.09   38.20
 -22  12  -7   13.20   35.70
 -23 -13   7  108.69   32.00
 -23  13   7   89.49   39.60
 -21 -13   7  112.39   54.49
 -21 -13   7  186.18   27.50
 -21  13   7  185.28   37.60
 -19 -13   7  481.65   76.09
 -19 -13   7  493.15   35.70
 -19  13   7  510.45   42.70
 -17 -13   7   92.69   44.10
 -17 -13   7  144.09   19.50
 -17  13   7  117.69   28.00
 -15 -13   7   81.49   42.10
 -15 -13   7  138.89   16.30
 -15  13   7  120.09   26.30
 -13 -13   7   22.10   12.50
 -13 -13   7   24.50   34.40
 -13  13   7   12.40   23.40
 -11 -13   7  415.36   23.20
 -11 -13   7  408.86   53.69
 -11  13   7  463.25   34.00
  -9 -13   7   82.19   32.50
  -9  13   7   88.99   21.30
   9  13  -7   82.89   11.80
  -7 -13   7 1245.08   80.69
   7  13  -7 1301.27   56.69
  -7  13   7 1227.88   64.39
  -5 -13   7 1158.18   71.79
   5  13  -7 1188.78   52.49
  -5  13   7 1136.29   57.39
   3  13  -7  428.16   24.80
  -3  13   7  475.05   31.30
  -5 -13  -7 2059.19   93.79
  -5  13  -7 2151.88   94.69
  -7  13  -7 1911.91   87.19
  -9 -13  -7  213.48   21.20
  -9  13  -7  224.88   23.20
 -11 -13  -7  171.68   22.20
 -11  13  -7  166.48   24.60
 -13 -13  -7   41.30   21.80
 -13  13  -7   25.70   24.40
 -15 -13  -7  369.56   34.90
 -15  13  -7  379.96   33.90
 -17 -13  -7  564.74   43.50
 -17  13  -7  619.34   46.30
 -19 -13  -7  494.05   44.90
 -19  13  -7  547.25   47.40
 -21 -13  -7  507.75   45.90
 -21  13  -7  452.85   43.80
 -22 -14   7  122.49   29.20
 -22  14   7  104.39   34.40
 -20 -14   7  144.99   52.49
 -20  14   7  298.87   39.10
 -18 -14   7  614.14   78.79
 -18 -14   7  682.03   38.50
 -18  14   7  632.74   47.60
 -16 -14   7  329.17   26.40
 -16 -14   7  308.47   50.09
 -16  14   7  320.07   32.20
 -14 -14   7   89.99   42.40
 -14 -14   7  109.69   15.30
 -14  14   7   90.99   25.10
 -12 -14   7   20.30   38.40
 -12 -14   7   47.90   12.30
 -12  14   7   30.10   24.20
 -10 -14   7   -0.30   36.90
 -10  14   7   24.60   22.20
  10  14  -7   36.30   12.60
  -8  14   7  200.68   23.00
   8  14  -7  180.18   17.30
  -6 -14   7 1483.15   93.39
   6  14  -7 1696.73   71.39
  -4 -14   7  957.30   64.29
   4  14  -7  774.12   40.10
  -4  14   7  826.42   43.10
  -4 -14  -7  177.68   19.00
  -4  14  -7  189.88   20.90
  -6  14  -7  316.07   26.30
  -8 -14  -7  222.18   21.70
  -8  14  -7  198.98   23.20
 -10 -14  -7  286.27   27.50
 -10  14  -7  296.47   29.50
 -12 -14  -7  428.16   33.60
 -12  14  -7  445.46   35.70
 -14 -14  -7   60.29   26.90
 -14  14  -7   26.50   26.30
 -16 -14  -7   92.49   26.50
 -16  14  -7  118.69   29.90
 -18 -14  -7    9.80   32.20
 -18  14  -7   31.20   32.20
 -20 -14  -7   39.00   31.70
 -20  14  -7   35.60   33.60
 -22 -14  -7   23.00   34.90
 -22  14  -7   33.70   37.30
 -21 -15   7  201.88   29.00
 -21  15   7  185.68   37.00
 -19 -15   7  223.68   25.40
 -19  15   7  176.28   33.40
 -17 -15   7  309.67   23.60
 -17 -15   7  196.48   52.09
 -17  15   7  289.47   33.20
 -15 -15   7   23.10   46.70
 -15 -15   7   86.59   16.10
 -15  15   7   91.79   27.40
 -13 -15   7  113.49   44.10
 -13 -15   7  147.09   15.40
 -13  15   7  148.79   27.60
 -11 -15   7  155.48   43.70
 -11  15   7  188.38   25.70
  11  15  -7  158.18   16.30
  -9 -15   7  578.04   60.99
   9  15  -7  623.34   32.00
  -9  15   7  629.04   39.70
  -7 -15   7  788.12   72.69
   7  15  -7  893.71   40.70
  -7  15   7  838.82   47.00
  -5  15   7 1232.58   62.29
   5  15  -7 1281.67   57.49
  -3 -15   7 1032.40   78.99
   3  15  -7  860.91   44.10
   1  15  -7  218.38   21.60
  -1  15   7  220.68   21.90
   1 -15   7 1414.56   84.89
   1  15   7 1197.58   61.49
  -1  15  -7 1209.48   59.09
  -3  15  -7  664.23   35.60
  -5 -15  -7 1223.18   59.19
  -5  15  -7 1258.27   59.29
  -7 -15  -7 1144.29   55.79
  -9 -15  -7   59.19   19.30
  -9  15  -7   66.39   21.40
 -11 -15  -7   90.59   22.10
 -11  15  -7  113.19   24.50
 -13 -15  -7  257.87   27.20
 -13  15  -7  224.38   28.10
 -15 -15  -7  238.78   29.10
 -15  15  -7  243.88   32.20
 -17 -15  -7  378.56   35.20
 -17  15  -7  388.96   38.50
 -19 -15  -7  428.86   39.60
 -19  15  -7  398.46   40.90
 -21 -15  -7  324.67   42.90
 -21  15  -7  249.97   40.30
 -22 -16   7   10.90   29.50
 -22  16   7   29.50   37.40
 -20  16   7  269.67   39.10
 -18 -16   7  693.43   39.20
 -18 -16   7  470.55   65.69
 -18  16   7  696.43   48.40
 -16 -16   7  172.08   53.49
 -16 -16   7  286.17   26.10
 -16  16   7  321.77   33.30
 -14 -16   7  112.59   49.20
 -14  16   7  194.98   29.00
 -12 -16   7   10.30   44.30
  12  16  -7   14.50   15.20
 -12  16   7   39.60   26.50
 -10 -16   7   10.10   43.20
 -10  16   7    0.60   18.70
  10  16  -7   -0.80   13.90
  -8 -16   7  123.99   39.40
   8  16  -7  121.79   15.20
  -8  16   7  109.59   23.80
  -6 -16   7  650.43   64.59
  -6  16   7  656.93   41.20
   6  16  -7  682.63   34.60
  -4 -16   7  489.15   58.39
  -4  16   7  331.97   31.50
   4  16  -7  344.27   25.10
  -2  16   7  102.09   22.60
   2  16  -7   90.99   15.90
  -4  16  -7  -10.80   16.90
  -6 -16  -7   56.59   18.20
  -6  16  -7   58.19   19.60
  -8 -16  -7   45.30   19.20
  -8  16  -7   47.40   21.30
 -10 -16  -7   80.49   21.50
 -10  16  -7   58.69   22.60
 -12 -16  -7  102.89   26.10
 -12  16  -7   71.19   26.00
 -14 -16  -7   29.00   25.00
 -14  16  -7   -0.60   27.40
 -16 -16  -7  359.06   33.50
 -16  16  -7  309.37   35.80
 -18 -16  -7   20.80   29.90
 -18  16  -7   69.89   34.40
 -20 -16  -7   -5.20   32.60
 -20  16  -7   55.79   36.50
 -21 -17   7   45.30   29.10
 -21  17   7   24.50   37.10
 -19 -17   7  -14.30   22.10
 -19  17   7   -7.30   33.70
 -17 -17   7    3.10   19.80
 -17  17   7   55.49   32.60
 -15 -17   7    6.20   53.39
 -15  17   7   81.49   28.90
 -13 -17   7   60.09   45.40
 -13  17   7  113.09   29.20
 -11 -17   7  103.99   49.30
 -11  17   7   76.79   28.00
  11  17  -7  106.29   16.80
  -9 -17   7  535.75   66.39
  -9  17   7  436.76   32.40
   9  17  -7  418.36   28.10
  -7 -17   7  171.78   45.10
  -7  17   7  108.19   24.30
   7  17  -7  109.69   15.60
   5  17  -7  274.17   23.50
  -5  17   7  301.67   26.40
   3  17  -7   94.99   16.10
  -3  17   7  107.79   24.10
  -1  17  -7  320.57   26.40
   1  17   7  340.47   30.90
  -3  17  -7   34.50   17.00
   3  17   7   62.59   21.80
  -5  17  -7 1124.69   55.19
  -7 -17  -7  105.19   21.30
  -7  17  -7  154.58   24.50
  -9 -17  -7  299.67   26.40
  -9  17  -7  302.97   28.00
 -11 -17  -7   38.90   22.10
 -11  17  -7  -14.30   24.30
 -13 -17  -7   11.30   23.90
 -13  17  -7   10.80   26.50
 -15 -17  -7   93.49   27.50
 -15  17  -7  130.89   30.00
 -17 -17  -7  289.77   37.20
 -17  17  -7  256.27   37.00
 -19 -17  -7  202.88   35.70
 -19  17  -7  251.07   38.60
 -20  18   7   65.79   36.40
 -18 -18   7  218.48   24.90
 -18  18   7  229.68   37.30
 -16 -18   7  -62.59   59.99
 -16  18   7  118.79   31.90
 -14 -18   7  -87.29   54.19
 -14  18   7   17.60   28.80
  14  18  -7  -11.50   18.80
 -12 -18   7   31.40   49.70
 -12  18   7  -12.70   22.10
  12  18  -7  -21.10   18.00
 -10 -18   7   62.59   47.70
 -10  18   7   -3.00   26.30
  10  18  -7   10.60   16.60
  -8 -18   7  170.08   49.10
   8  18  -7   37.30   16.40
  -8  18   7   45.20   25.90
  -6  18   7  168.48   28.20
   6  18  -7  202.08   18.50
  -4 -18   7  747.03   67.59
  -4  18   7  607.34   42.30
   4  18  -7  598.84   34.20
  -2  18   7  276.87   28.30
   2  18  -7  231.58   22.80
  -2  18  -7  129.99   18.80
   2  18   7  143.79   25.00
  -4  18  -7   26.10   18.40
   4  18   7   40.90   22.70
  -6  18  -7   -9.40   19.80
  -8 -18  -7   10.60   20.80
  -8  18  -7    2.60   22.60
 -10 -18  -7   13.60   22.30
 -10  18  -7    0.10   23.70
 -12 -18  -7   -3.10   24.30
 -12  18  -7  -13.70   25.30
 -14 -18  -7  149.09   28.00
 -14  18  -7  126.39   30.80
 -16 -18  -7  148.79   30.50
 -16  18  -7  167.58   34.10
 -18 -18  -7   81.29   33.10
 -18  18  -7  106.29   36.50
 -20 -18  -7   21.60   35.40
 -20  18  -7   38.50   38.10
 -19 -19   7   59.59   25.20
 -19  19   7   66.89   37.30
 -17  19   7   -4.50   34.50
  15  19  -7  189.88   23.20
 -15  19   7  172.08   33.60
 -13 -19   7  102.39   64.39
 -13  19   7  229.88   34.10
  13  19  -7  258.07   23.00
 -11 -19   7  116.49   60.19
 -11  19   7  -22.50   28.70
  11  19  -7   36.60   18.50
  -9 -19   7  207.28   56.29
   9  19  -7   82.19   17.80
  -9  19   7   83.79   27.70
   7  19  -7  260.07   22.10
  -7  19   7  261.17   30.70
   3  19   7  235.28   28.50
  -3  19  -7  242.18   24.40
  -5  19  -7  187.78   22.90
   5  19   7  211.08   27.30
  -7  19  -7  311.77   31.00
  -9 -19  -7  461.75   34.90
  -9  19  -7  400.26   36.30
 -11 -19  -7   82.99   27.80
 -11  19  -7   65.79   26.50
 -13 -19  -7   41.30   26.20
 -13  19  -7   80.49   29.20
 -15 -19  -7  142.49   29.90
 -15  19  -7  127.09   32.10
 -17 -19  -7  281.07   39.30
 -17  19  -7  243.78   37.60
 -19 -19  -7   81.99   35.70
 -18  20   7   64.39   37.30
 -16  20   7   61.19   33.40
  16  20  -7   20.00   22.20
 -14  20   7   48.60   33.40
  14  20  -7   49.99   21.60
 -12 -20   7   -9.80   61.09
  12  20  -7   27.10   20.10
 -12  20   7   11.70   30.50
 -10 -20   7  243.78   69.19
  10  20  -7  123.49   20.50
 -10  20   7  129.39   31.60
  -8 -20   7  174.78   59.99
  -8  20   7   48.20   29.10
   8  20  -7   16.70   18.20
   6  20  -7  219.68   21.40
  -6  20   7  231.68   31.80
  -4  20   7  484.75   40.30
   4  20  -7  490.75   33.00
  -2  20  -7   68.79   21.00
   2  20   7  120.69   27.00
  -4  20  -7   -5.40   20.20
   4  20   7   39.70   25.90
  -6  20  -7   10.10   24.70
   6  20   7   16.30   25.40
  -8  20  -7   -2.50   24.10
 -10 -20  -7   -5.60   24.40
 -10  20  -7   -0.40   26.40
 -12 -20  -7  186.88   28.60
 -12  20  -7  139.19   29.90
 -14 -20  -7  242.68   35.00
 -14  20  -7  205.98   34.00
 -16 -20  -7   37.10   35.20
 -16  20  -7    7.90   32.20
 -18 -20  -7   20.30   34.40
 -18  20  -7   48.20   37.00
 -19  21   7  160.48   46.90
  17  21  -7  186.08   25.90
 -17  21   7  175.48   39.30
 -15  21   7  525.35   49.80
  15  21  -7  527.75   38.50
 -13 -21   7  377.16   83.09
 -13  21   7  459.85   41.80
  13  21  -7  506.75   34.60
 -11 -21   7  287.37   76.49
  11  21  -7  255.57   24.80
 -11  21   7  265.97   35.70
  -9 -21   7  159.58   64.89
  -9  21   7   73.79   31.70
   9  21  -7   23.10   20.70
  -7  21   7  407.76   41.80
   7  21  -7  456.45   32.20
  -5 -21   7 1029.90   88.59
   5  21  -7  805.22   45.10
  -5  21   7  824.02   53.19
   3  21  -7  395.06   32.40
  -3  21   7  385.46   39.10
   1  21   7  396.76   37.70
  -1  21  -7  402.86   33.40
   3  21   7  112.29   28.60
  -3  21  -7  121.09   24.20
  -5  21  -7   52.39   22.40
   5  21   7   83.79   27.60
  -7  21  -7  412.16   39.90
   7  21   7  442.86   39.00
  -9  21  -7  224.78   29.80
 -11 -21  -7  138.99   31.20
 -11  21  -7  162.08   30.60
 -13 -21  -7   91.69   28.40
 -13  21  -7  115.89   31.70
 -15 -21  -7  357.06   39.30
 -15  21  -7  242.38   37.20
 -17 -21  -7  555.74   55.59
 -17  21  -7  528.55   50.89
 -18  22   7  151.28   41.60
  16  22  -7   89.39   24.90
 -16  22   7  134.39   39.50
 -14  22   7    8.80   35.80
  14  22  -7   41.40   22.60
 -12 -22   7  -36.20   69.79
 -12  22   7  109.09   34.60
  12  22  -7   89.89   23.20
 -10 -22   7  143.49   72.59
  10  22  -7  136.99   22.70
 -10  22   7  173.48   33.90
  -8 -22   7  674.73  102.59
  -8  22   7  395.46   39.90
   8  22  -7  397.46   33.70
   6  22  -7  504.65   33.60
  -6  22   7  517.05   44.50
   4  22  -7  600.64   39.90
  -4  22   7  697.43   48.20
   0  22   7  321.07   33.40
   0  22  -7  308.87   27.40
   2  22   7  298.37   32.00
  -2  22  -7  263.37   27.90
   4  22   7   90.59   29.50
  -4  22  -7   67.19   22.80
  -6  22  -7    8.50   27.70
   6  22   7   16.40   27.50
  -8  22  -7  -12.50   25.30
   8  22   7    7.10   28.40
 -10  22  -7   44.20   28.50
 -12 -22  -7   83.19   29.60
 -12  22  -7  100.59   31.90
 -14 -22  -7  223.88   37.20
 -14  22  -7  203.78   35.70
 -16 -22  -7   46.50   38.20
 -16  22  -7   80.29   35.80
 -17  23   7  210.28   43.50
 -15  23   7  486.55   47.40
 -13  23   7  435.96   44.20
  13  23  -7  412.96   36.10
 -11 -23   7   24.20   90.09
 -11  23   7  151.48   37.00
  11  23  -7  184.98   25.00
  -9 -23   7  171.78   86.59
  -9  23   7  104.39   33.60
   9  23  -7   77.79   24.30
  -7 -23   7  366.06   76.49
  -7  23   7  148.29   33.60
   7  23  -7  184.78   24.10
   5  23  -7  148.29   24.20
  -5  23   7  177.48   33.80
  -3  23   7  399.76   38.80
   3  23  -7  352.16   32.60
  -1  23   7  267.07   35.00
   1  23  -7  239.18   26.50
  -1  23  -7  343.57   31.10
   1  23   7  388.86   35.60
  -3  23  -7  317.77   31.60
   3  23   7  318.77   33.90
   5  23   7  549.85   44.00
  -5  23  -7  569.74   43.80
   7  23   7   79.09   33.50
  -7  23  -7   86.19   27.00
  -9  23  -7  353.96   33.50
   9  23   7  260.67   34.70
 -11  23  -7  180.18   33.40
 -13 -23  -7  179.08   36.40
 -13  23  -7  184.38   35.30
 -15 -23  -7  476.15   46.80
 -15  23  -7  460.35   44.60
 -17 -23  -7  252.47   44.60
 -17  23  -7  290.97   46.40
 -16  24   7  204.68   43.80
 -14  24   7  228.78   42.30
  14  24  -7  226.38   27.80
 -12  24   7   68.59   38.00
  12  24  -7   37.00   25.70
 -10 -24   7  -35.20   92.49
 -10  24   7   45.00   36.90
  10  24  -7   78.49   25.60
  -8 -24   7  521.05   88.29
  -8  24   7  510.75   47.50
   8  24  -7  471.35   38.00
   6  24  -7  376.26   35.70
  -6  24   7  390.06   40.40
  -2  24   7   50.59   32.00
   0  24  -7  179.38   26.80
   0  24   7  191.98   33.60
  -2  24  -7  309.67   28.80
   2  24   7  281.67   35.90
   4  24   7  107.29   31.30
   6  24   7  141.79   33.50
  -6  24  -7  188.68   28.90
   8  24   7   -1.20   29.80
  -8  24  -7    4.80   28.40
 -10  24  -7    2.10   30.10
  10  24   7   11.20   31.70
 -12  24  -7    4.20   33.30
 -14 -24  -7   95.89   34.10
 -14  24  -7  160.58   38.20
 -16 -24  -7  157.38   38.60
 -15  25   7  241.88   45.50
 -13  25   7  178.88   42.60
  13  25  -7  152.58   28.00
  11  25  -7   43.90   24.90
 -11  25   7   36.90   36.80
  -9 -25   7 -125.49   86.69
  -9  25   7   -1.00   36.90
   9  25  -7   -3.80   25.10
  -7 -25   7  144.99  102.29
  -7  25   7   49.10   35.80
   7  25  -7   48.80   24.90
  -5  25   7  399.36   43.50
   5  25  -7  440.46   38.20
  -3  25   7  617.34   50.29
   3  25  -7  548.65   45.80
  -1  25   7  486.95   47.10
   1  25  -7  454.75   39.10
  -1  25  -7  731.13   46.90
   1  25   7  641.34   51.29
  -3  25  -7  756.92   48.70
   3  25   7  659.43   49.70
   5  25   7  439.96   39.00
  -5  25  -7  366.96   34.30
  -7  25  -7  280.97   32.50
   7  25   7  262.17   36.00
   9  25   7  121.29   33.50
  -9  25  -7  141.89   36.60
 -11  25  -7   75.39   33.10
  11  25   7   36.70   34.20
 -13  25  -7  131.09   37.30
 -15  25  -7  190.98   40.90
 -14  26   7   89.39   43.90
  12  26  -7  -48.60   26.90
 -12  26   7  -10.90   41.10
 -10  26   7   25.30   38.90
  10  26  -7   18.70   27.90
  -8 -26   7 -181.28   93.39
  -8  26   7   29.10   38.00
   8  26  -7   -9.80   25.50
  -6  26   7   26.10   38.20
  -4  26   7   86.09   37.20
   4  26  -7   61.79   27.60
   2  26  -7   36.80   26.30
  -2  26   7   48.30   36.20
   0  26   7  -22.20   34.80
   0  26  -7  -35.30   27.70
  -2  26  -7   94.29   26.50
   2  26   7   59.09   34.00
   4  26   7  281.17   38.00
  -4  26  -7  329.27   35.50
   6  26   7   19.20   33.10
  -6  26  -7   48.30   33.10
  -8  26  -7   26.40   30.00
   8  26   7   -7.00   37.70
 -10  26  -7    9.70   32.70
  10  26   7   13.10   39.70
  12  26   7   -1.30   35.50
 -12  26  -7   19.80   38.60
 -14  26  -7  153.58   38.80
 -13  27   7   29.70   45.20
 -11  27   7   30.10   42.70
  -9  27   7   63.89   42.10
   7  27  -7   22.00   28.40
  -7  27   7    4.30   39.80
  -5  27   7   73.89   38.50
   5  27  -7   57.89   27.50
  -3  27   7  322.37   43.00
   3  27  -7  302.87   32.80
  -1  27   7  544.35   52.39
   1  27  -7  578.64   44.50
   1  27   7  276.27   40.80
  -1  27  -7  320.27   35.50
  -3  27  -7  198.48   32.70
   3  27   7  155.88   38.30
   5  27   7   25.40   33.60
   7  27   7  -15.50   34.10
  -7  27  -7   16.20   31.70
  -9  27  -7   31.10   33.80
   9  27   7    4.40   40.90
 -11  27  -7   25.60   36.10
  11  27   7   33.50   36.40
 -13  27  -7   33.70   37.30
  13  27   7   46.00   37.90
 -12  28   7   -6.50   43.60
 -10  28   7   -1.40   44.40
  10  28  -7  -23.50   29.70
   8  28  -7   -9.10   29.30
  -8  28   7   24.90   43.20
   6  28  -7   46.30   29.30
  -6  28   7   36.10   41.40
   4  28  -7   -7.50   28.40
  -4  28   7  -14.10   39.80
  -2  28   7    8.60   39.30
   2  28  -7   25.20   29.90
   0  28   7   17.90   38.40
   0  28  -7    3.90   29.70
   2  28   7  119.89   39.40
  -2  28  -7  176.28   34.20
   4  28   7  258.77   44.70
  -4  28  -7  236.78   37.50
  -6  28  -7  117.39   36.80
   6  28   7   60.29   37.30
   8  28   7   11.00   37.00
  -8  28  -7   30.80   38.10
 -10  28  -7   54.59   40.20
  10  28   7   -2.10   37.20
  11  29  -7    9.50   35.40
 -11  29   7   14.80   45.60
   9  29  -7   55.79   30.90
  -9  29   7   29.10   45.40
  -7  29   7    2.10   45.10
   7  29  -7    3.80   31.10
   5  29  -7   30.00   29.50
  -5  29   7   45.40   41.70
   3  29  -7  341.47   35.60
  -3  29   7  283.27   46.20
  -1  29   7  463.25   49.80
   1  29  -7  504.35   46.20
   1  29   7  148.09   42.10
  -1  29  -7  199.08   31.70
   3  29   7   95.29   43.00
  -3  29  -7   66.29   30.20
   5  29   7  -21.80   38.40
  -5  29  -7    1.40   31.80
   7  29   7  -34.70   37.40
  -7  29  -7   14.70   34.60
  -9  29  -7   23.30   36.70
   9  29   7   30.20   38.10
  -8  30   7   16.80   46.80
   8  30  -7   12.80   33.00
  -6  30   7  -14.90   50.49
   6  30  -7   20.10   31.30
   4  30  -7  -16.20   31.40
  -4  30   7   14.50   41.90
   2  30  -7   47.40   32.80
  -2  30   7   67.19   43.20
   0  30  -7  173.78   35.20
   0  30   7  172.08   44.10
  -2  30  -7  190.48   32.90
   2  30   7  207.48   47.90
  -4  30  -7  118.99   34.10
   4  30   7  132.59   41.80
  -6  30  -7   26.60   34.60
   6  30   7    5.00   39.60
  -8  30  -7   42.00   41.90
   8  30   7   -0.40   38.40
   7  31  -7   -7.60   34.40
  -7  31   7    3.40   47.90
   5  31  -7    0.30   35.20
  -5  31   7   10.00   45.50
   3  31  -7   88.99   34.20
  -3  31   7   95.09   45.20
  -1  31   7  214.08   48.20
   1  31  -7  200.98   37.40
   1  31   7  108.69   43.60
  -3  31  -7   63.99   37.80
   3  31   7   84.19   43.90
  -5  31  -7   22.50   38.90
   5  31   7   37.00   41.60
   2  32  -7   29.10   38.50
  -2  32   7    3.80   47.10
   0  32   7   59.29   46.20
   0  32  -7   83.99   37.90
   2  32   7   63.79   45.30
 -24   0   8  368.26   34.90
 -22   0   8  463.55   39.20
 -20   0   8  210.28   24.70
 -18   0   8  153.78   21.50
 -16   0   8   14.00   17.40
 -14   0   8  139.39   17.10
 -12   0   8   29.00   14.00
 -10   0   8   49.90   12.10
  -8   0   8 1178.28   53.39
  -6   0   8 5203.88  224.88
  -4   0   8 2873.81  124.59
   2   0  -8 2272.57   98.79
   0   0  -8  559.74   26.40
   2   0   8 1890.11   86.39
  -2   0  -8 1812.62   81.39
  -4   0  -8  916.81   42.80
   4   0   8  922.61   48.10
  -6   0  -8 1785.42   79.39
   6   0   8 1760.52   80.69
  -8   0  -8 1687.83   76.49
 -10   0  -8  181.48   19.00
 -12   0  -8   81.49   18.60
 -14   0  -8  277.37   25.40
 -16   0  -8  787.22   46.60
 -18   0  -8 1540.85   76.39
 -20   0  -8  414.86   36.70
 -22   0  -8  163.78   33.00
 -24   0  -8  301.57   40.40
 -25  -1   8   36.40   48.40
 -25  -1   8   74.89   29.90
 -25   1   8   75.09   30.60
 -23  -1   8   20.80   26.00
 -23   1   8   14.90   27.40
 -21  -1   8   25.40   22.80
 -21   1   8   36.20   24.00
 -19  -1   8  490.25   33.90
 -19   1   8  458.05   35.40
 -17  -1   8 1931.61   87.89
 -15  -1   8  980.90   48.30
 -15   1   8  988.40   48.90
 -13  -1   8   35.90   14.40
 -13   1   8   46.40   15.00
 -11  -1   8  254.67   19.90
 -11   1   8  257.47   20.60
  -9  -1   8  119.39   12.70
  -9   1   8  138.79   13.70
  -7  -1   8  602.54   29.80
  -7   1   8  629.24   30.40
  -5  -1   8 1754.52   75.99
  -5   1   8 1717.83   76.29
  -3  -1   8  437.46   21.50
  -3   1   8  452.75   23.10
   1  -1  -8  377.76   19.20
   1   1  -8  372.06   19.30
   1  -1   8   91.29   18.60
  -1  -1  -8  124.79   11.70
  -1   1  -8  117.39   10.80
  -3  -1  -8   29.50   10.30
   3  -1   8   24.70   15.80
  -3   1  -8   23.00    9.70
   3   1   8   39.80   15.10
  -5  -1  -8  785.72   37.20
   5  -1   8  692.63   40.80
   5   1   8  803.72   40.60
  -5   1  -8  778.82   37.20
  -7  -1  -8 1963.30   86.59
  -7   1  -8 1904.01   86.59
  -9  -1  -8  807.52   41.30
  -9   1  -8  823.42   41.40
 -13  -1  -8   89.09   20.20
 -13   1  -8   85.59   19.40
 -15  -1  -8   -3.30   21.50
 -15   1  -8   24.80   21.50
 -17  -1  -8   32.00   23.20
 -17   1  -8   56.59   23.60
 -19  -1  -8   14.20   26.50
 -19   1  -8  -21.10   26.20
 -21  -1  -8   35.10   29.70
 -21   1  -8   23.40   29.40
 -23  -1  -8  303.37   38.20
 -23   1  -8  283.77   38.10
 -24  -2   8  357.66   31.60
 -24  -2   8  277.57   49.00
 -24   2   8  298.47   33.50
 -22  -2   8  370.26   35.50
 -22   2   8  317.37   31.40
 -20  -2   8  238.48   25.40
 -20   2   8  229.58   24.60
 -18  -2   8  397.26   30.70
 -18   2   8  434.86   30.50
 -16  -2   8   13.50   15.50
 -16   2   8   26.00   19.20
 -14  -2   8   23.10   14.20
 -14   2   8    8.20   16.10
 -12  -2   8   16.10   12.80
 -12   2   8    4.30   12.70
 -10  -2   8  463.75   25.00
 -10   2   8  467.25   25.50
  -8  -2   8 2471.35  109.19
  -8   2   8 2542.75  110.09
  -6  -2   8 1909.91   82.99
  -6   2   8 1900.31   83.99
  -4  -2   8 1163.88   51.09
  -4   2   8 1160.98   52.29
  -2  -2   8  281.97   32.00
   2   2  -8  312.67   15.70
   0  -2  -8 1749.43   76.09
   0  -2   8 1746.63   82.19
   0   2  -8 1676.33   75.39
  -2  -2  -8   77.09   10.90
   2  -2   8   40.70   15.20
  -2   2  -8   71.09    9.40
  -4  -2  -8 1373.56   60.59
   4  -2   8 1201.98   63.99
  -4   2  -8 1351.66   60.39
   4   2   8 1434.46   64.19
  -6  -2  -8 1590.44   71.59
   6   2   8 1540.25   71.99
  -6   2  -8 1633.44   71.69
  -8  -2  -8 2487.35  111.69
  -8   2  -8 2555.14  111.79
 -10  -2  -8   62.99   16.30
 -12  -2  -8   94.09   17.90
 -12   2  -8  100.19   19.30
 -14  -2  -8  185.48   23.30
 -14   2  -8  201.08   23.40
 -16  -2  -8  703.73   43.60
 -16   2  -8  741.73   44.00
 -18  -2  -8  489.45   39.20
 -18   2  -8  484.95   39.30
 -20  -2  -8  266.07   32.00
 -20   2  -8  315.47   33.50
 -22  -2  -8  187.18   34.00
 -22   2  -8  155.98   34.30
 -24  -2  -8   90.29   35.50
 -24   2  -8  130.39   37.60
 -25  -3   8   38.20   49.50
 -25  -3   8   49.60   29.70
 -25   3   8   34.50   28.40
 -23  -3   8    6.30   25.50
 -23  -3   8   48.60   43.60
 -23   3   8   47.10   28.60
 -21  -3   8  154.58   25.20
 -21  -3   8  151.38   43.30
 -21   3   8  211.08   25.30
 -19  -3   8  650.13   41.50
 -19   3   8  672.93   39.70
 -17  -3   8  252.97   25.50
 -17   3   8  293.77   29.40
 -15  -3   8  551.94   30.60
 -15   3   8  526.45   34.00
 -13  -3   8  129.69   14.70
 -13   3   8  125.29   18.20
 -11  -3   8  355.96   21.50
 -11   3   8  362.86   25.00
  -9  -3   8  651.33   31.80
  -9   3   8  693.43   34.80
  -7  -3   8 1217.28   52.49
  -7   3   8 1157.08   53.99
  -5  -3   8  338.07   17.00
  -5  -3   8  369.86   37.10
  -5   3   8  368.26   21.30
  -3  -3   8  232.28   31.30
  -3   3   8  198.08   16.60
  -1  -3   8  201.88   29.30
   1  -3  -8  205.58   15.80
   1   3  -8  191.68   12.20
   1  -3   8  453.75   35.60
  -1  -3  -8  409.96   22.30
  -1   3  -8  405.46   20.80
   3  -3   8  833.92   48.30
  -3  -3  -8  914.11   41.90
  -3   3  -8  934.51   41.30
  -5  -3  -8  442.36   24.60
  -5   3  -8  391.66   24.10
  -7  -3  -8 1796.72   78.39
   7   3   8 1648.94   76.69
  -7   3  -8 1780.02   78.49
  -9  -3  -8  466.45   28.60
  -9   3  -8  485.55   29.60
 -11  -3  -8  528.05   36.50
 -13  -3  -8  291.97   27.00
 -13   3  -8  306.97   28.30
 -15  -3  -8   73.39   21.50
 -15   3  -8   66.49   22.20
 -17  -3  -8   32.90   23.40
 -17   3  -8   33.20   24.70
 -19  -3  -8   21.50   25.30
 -19   3  -8    8.20   27.70
 -21  -3  -8   71.59   29.70
 -21   3  -8  123.29   30.00
 -23  -3  -8  425.76   40.50
 -23   3  -8  405.96   42.50
 -24  -4   8  166.28   49.99
 -24  -4   8  227.18   29.70
 -24   4   8  208.68   33.20
 -22  -4   8  123.89   25.70
 -22  -4   8  126.99   45.90
 -22   4   8  179.88   26.80
 -20  -4   8  278.07   25.40
 -20  -4   8  233.88   44.30
 -20   4   8  234.68   26.40
 -18  -4   8  416.16   30.50
 -18  -4   8  413.96   60.79
 -18   4   8  441.86   35.40
 -16  -4   8    7.50   33.70
 -16  -4   8   44.00   17.00
 -14  -4   8   16.90   13.80
 -14  -4   8   15.90   27.90
 -14   4   8    4.10   15.90
 -12  -4   8    3.40   25.20
 -12  -4   8   11.80   11.80
 -12   4   8   27.10   16.30
 -10  -4   8   34.70    9.60
 -10  -4   8   27.30   24.70
 -10   4   8   45.50   15.00
  -8  -4   8  365.96   46.80
  -8  -4   8  379.36   19.60
  -8   4   8  424.76   23.70
  -6  -4   8  940.51   38.90
  -6  -4   8  811.72   54.99
  -6   4   8  880.41   41.80
  -4  -4   8 1678.83   71.09
  -4  -4   8 1649.33   82.79
  -4   4   8 1607.14   73.09
  -2  -4   8  513.25   39.20
  -2   4   8  498.75   26.70
   2   4  -8  539.45   23.70
   0  -4   8  992.80   53.89
   0  -4  -8  977.70   45.10
   0   4  -8  988.80   44.20
  -2  -4  -8  663.93   31.60
   2  -4   8  607.24   38.90
  -2   4  -8  646.14   30.90
  -4  -4  -8  956.00   46.40
   4  -4   8 1071.49   53.19
  -4   4  -8  933.11   45.70
  -6  -4  -8 1630.14   74.69
  -6   4  -8 1675.93   74.69
  -8  -4  -8  885.21   43.40
  -8   4  -8  866.01   43.60
 -10  -4  -8  156.58   18.00
 -10   4  -8  156.88   19.30
 -12  -4  -8   92.59   18.40
 -12   4  -8   77.69   18.80
 -14  -4  -8  287.47   28.40
 -14   4  -8  315.07   27.00
 -16  -4  -8  548.55   37.60
 -16   4  -8  576.04   39.00
 -18  -4  -8  273.77   28.80
 -18   4  -8  246.28   30.70
 -20  -4  -8  185.08   29.30
 -20   4  -8  135.79   30.70
 -22  -4  -8   27.30   29.70
 -22   4  -8   -2.70   32.60
 -24  -4  -8   19.70   33.50
 -24   4  -8   25.00   35.60
 -23  -5   8   16.60   26.00
 -23  -5   8   13.20   43.50
 -23   5   8   38.90   27.20
 -21  -5   8   31.40   24.40
 -21  -5   8   30.20   41.20
 -21   5   8   30.80   25.00
 -19  -5   8   59.19   39.50
 -19  -5   8   78.99   21.80
 -19   5   8   81.89   22.50
 -17  -5   8  182.58   38.00
 -17  -5   8  235.88   21.20
 -17   5   8  205.48   23.20
 -15  -5   8  240.28   38.20
 -15  -5   8  258.27   23.00
 -15   5   8  274.47   27.40
 -13  -5   8    6.80   27.30
 -13  -5   8   16.50   12.80
 -13   5   8    4.60   15.70
 -11  -5   8   -4.20   28.70
 -11  -5   8    7.30   10.10
 -11   5   8   -1.30   14.10
  -9  -5   8  127.59   12.20
  -9  -5   8  117.99   30.20
  -9   5   8  146.19   15.90
  -7  -5   8  117.39   29.10
  -7  -5   8   77.79    7.50
  -7   5   8  127.09   14.40
  -5  -5   8  576.24   45.00
  -5   5   8  587.94   30.30
  -3  -5   8  961.30   58.89
  -3   5   8  988.80   44.90
   3   5  -8  944.61   41.80
  -1  -5   8    5.00   19.70
   1   5  -8   -0.90    6.30
  -1  -5  -8   16.00   10.90
   1  -5   8   38.00   20.60
  -1   5  -8   15.00    8.70
   3  -5   8  895.71   51.49
  -3  -5  -8  876.61   42.30
  -3   5  -8  904.71   42.20
  -5  -5  -8 1606.14   71.99
  -5   5  -8 1582.84   71.79
  -9  -5  -8 1309.37   61.79
  -9   5  -8 1392.46   63.59
 -11  -5  -8  181.08   20.00
 -11   5  -8  166.18   21.20
 -13  -5  -8  137.99   20.30
 -13   5  -8  143.09   22.50
 -15  -5  -8   -5.90   20.40
 -15   5  -8   23.50   22.70
 -17  -5  -8  173.68   26.00
 -17   5  -8  193.68   27.20
 -19  -5  -8  143.69   27.10
 -19   5  -8   94.89   29.10
 -21  -5  -8  189.68   31.50
 -21   5  -8  137.99   32.20
 -23  -5  -8  262.57   40.70
 -23   5  -8  256.77   39.00
 -24  -6   8   28.20   45.60
 -24  -6   8   85.39   28.50
 -24   6   8   55.09   29.70
 -22  -6   8  221.98   28.50
 -22  -6   8  196.28   46.00
 -22   6   8  215.58   32.80
 -20  -6   8   95.89   22.60
 -20  -6   8   82.19   41.50
 -20   6   8   84.69   24.20
 -18  -6   8  297.67   24.40
 -18  -6   8  232.18   43.00
 -18   6   8  302.87   28.70
 -16  -6   8  176.28   19.00
 -16  -6   8  118.99   37.20
 -16   6   8  160.58   23.80
 -14  -6   8   31.80   13.70
 -14   6   8   48.40   29.40
 -12  -6   8   73.29   11.90
 -12  -6   8   49.30   30.60
 -12   6   8   63.79   18.30
 -10  -6   8  142.49   13.10
 -10  -6   8  116.49   30.90
 -10   6   8  154.18   17.40
  -8  -6   8  510.95   46.70
  -8  -6   8  534.75   24.00
  -8   6   8  522.55   29.70
  -6  -6   8 1374.26   75.49
  -6   6   8 1411.56   64.49
  -4  -6   8 2117.69  101.49
  -4   6   8 2024.60   92.39
  -2  -6   8 1397.26   73.49
   2   6  -8 1435.26   61.99
  -2   6   8 1439.76   64.59
   0  -6   8   21.30   19.80
   0  -6  -8   -0.50   11.10
   0   6  -8   -3.70    7.90
   2  -6   8  305.87   36.90
  -8  -6  -8  143.89   17.30
  -8   6  -8  156.68   18.20
 -10  -6  -8   54.99   26.80
 -10   6  -8   51.49   18.20
 -12  -6  -8    0.40   17.60
 -12   6  -8  -10.10   19.70
 -14  -6  -8  175.08   22.40
 -14   6  -8  182.38   24.30
 -16  -6  -8  215.38   26.40
 -16   6  -8  282.77   29.10
 -18  -6  -8  379.76   32.40
 -18   6  -8  358.36   33.90
 -20  -6  -8   79.49   32.00
 -20   6  -8   94.99   31.10
 -22  -6  -8   19.10   32.10
 -22   6  -8  -20.90   33.30
 -23  -7   8   44.40   46.60
 -23  -7   8   34.60   27.30
 -23   7   8   39.10   28.90
 -21  -7   8   34.40   22.60
 -21  -7   8   19.00   41.70
 -21   7   8   41.50   25.80
 -19  -7   8   20.90   38.20
 -19  -7   8   43.20   19.30
 -19   7   8   15.90   25.80
 -17  -7   8   95.99   18.70
 -17  -7   8   54.69   36.10
 -17   7   8   83.89   25.60
 -15  -7   8    9.90   33.80
 -15  -7   8   18.10   15.00
 -15   7   8    8.80   19.30
 -13  -7   8  309.57   52.99
 -13  -7   8  294.17   21.00
 -13   7   8  277.17   25.50
 -11  -7   8  132.49   32.50
 -11  -7   8  152.78   14.30
 -11   7   8  191.78   19.00
  -9  -7   8  553.24   48.60
  -9  -7   8  572.14   26.00
  -9   7   8  565.34   31.80
  -7  -7   8 1305.07   71.99
  -7   7   8 1231.68   59.09
  -5  -7   8   58.29   24.70
  -5   7   8   98.79   15.10
  -3  -7   8  588.94   45.60
   3   7  -8  584.44   26.00
  -3   7   8  608.84   31.80
  -1  -7   8  925.61   56.29
   1   7  -8  964.90   42.70
  -1   7   8  969.20   45.80
   1  -7   8  474.35   38.10
  -1  -7  -8  349.77   23.10
  -1   7  -8  350.46   21.10
  -3  -7  -8   15.30   13.20
  -3   7  -8  -11.80   11.10
  -7  -7  -8  289.07   23.00
  -7   7  -8  287.97   23.40
  -9  -7  -8  101.49   17.20
  -9   7  -8   98.09   18.30
 -11  -7  -8  380.16   27.80
 -11   7  -8  365.76   29.00
 -13  -7  -8  104.59   17.20
 -13   7  -8  100.29   22.90
 -15  -7  -8  -10.00   21.10
 -15   7  -8    8.10   22.30
 -17  -7  -8   33.30   23.90
 -17   7  -8   46.80   26.30
 -19  -7  -8  147.19   28.00
 -21  -7  -8  197.78   36.10
 -21   7  -8  162.18   34.70
 -23  -7  -8  232.78   38.30
 -23   7  -8  211.78   38.60
 -24  -8   8   83.29   29.30
 -24  -8   8   59.69   49.60
 -24   8   8   98.29   35.10
 -22  -8   8  148.59   25.90
 -22  -8   8   88.29   45.70
 -22   8   8  151.78   33.20
 -20  -8   8   46.90   35.00
 -20  -8   8   23.00   41.90
 -20   8   8   24.70   26.10
 -18  -8   8  197.98   21.50
 -18  -8   8  152.68   41.60
 -18   8   8  192.48   29.20
 -16  -8   8  127.09   37.40
 -16  -8   8  186.98   18.50
 -16   8   8  181.38   26.60
 -14  -8   8   13.40   13.70
 -14  -8   8   13.30   32.80
 -14   8   8   24.90   19.20
 -12  -8   8  374.66   22.10
 -12  -8   8  352.06   53.09
 -12   8   8  485.45   31.20
 -10  -8   8  359.56   18.70
 -10  -8   8  379.96   50.79
 -10   8   8  336.57   26.00
  -8  -8   8  789.12   60.59
  -8   8   8  803.22   41.00
  -6  -8   8 2644.74  127.09
  -6   8   8 2662.33  117.49
  -4  -8   8  740.33   51.69
  -4   8   8  715.03   37.70
  -2  -8   8  315.57   38.00
   2   8  -8  253.57   15.20
  -2   8   8  305.47   23.10
   0   8  -8  403.36   21.80
  -6  -8  -8 1527.45   71.89
  -6   8  -8 1626.94   72.09
  -8  -8  -8  625.04   35.30
  -8   8  -8  648.64   35.80
 -10  -8  -8  274.87   24.00
 -12  -8  -8  312.87   27.60
 -12   8  -8  286.57   29.00
 -14  -8  -8  201.18   24.90
 -14   8  -8  188.68   25.90
 -16  -8  -8  512.15   38.40
 -16   8  -8  514.35   39.80
 -18  -8  -8  260.17   32.60
 -18   8  -8  214.28   32.20
 -20  -8  -8   30.40   28.60
 -20   8  -8   22.00   30.60
 -22  -8  -8   16.00   36.50
 -22   8  -8   32.20   33.90
 -23  -9   8   17.00   28.30
 -23  -9   8  -35.20   49.99
 -23   9   8   10.30   30.80
 -21  -9   8   98.69   45.60
 -21  -9   8  100.99   24.70
 -21   9   8   42.20   28.40
 -19  -9   8   39.90   42.60
 -19  -9   8   75.69   20.60
 -19   9   8   72.89   29.50
 -17  -9   8  271.77   43.90
 -17  -9   8  319.27   26.60
 -17   9   8  316.07   28.50
 -15  -9   8   42.40   36.50
 -15  -9   8   49.60   14.70
 -15   9   8   44.90   21.20
 -13  -9   8   92.49   38.00
 -13  -9   8  128.29   13.50
 -13   9   8  131.69   23.30
 -11  -9   8  168.98   13.60
 -11  -9   8  166.38   31.60
 -11   9   8  158.38   20.60
  -9  -9   8   40.10    6.00
  -9  -9   8   25.10   27.20
  -9   9   8   53.69   16.90
  -7  -9   8 1544.95   83.69
  -7   9   8 1544.45   71.39
  -5  -9   8 1598.14   84.89
  -5   9   8 1611.94   73.69
  -3  -9   8  475.35   49.20
   3   9  -8  366.66   19.10
  -3   9   8  362.96   26.70
  -1  -9   8 1749.53   83.79
   1   9  -8 1578.44   70.89
  -1   9   8 1506.85   73.59
  -7  -9  -8    1.40   15.20
  -7   9  -8  -10.60   16.00
  -9   9  -8   -0.20   18.00
 -11  -9  -8  188.58   20.70
 -11   9  -8  163.68   22.70
 -13  -9  -8  163.08   22.50
 -13   9  -8  152.58   24.10
 -15  -9  -8   66.69   23.70
 -15   9  -8   65.69   19.90
 -17  -9  -8   92.19   26.80
 -17   9  -8   99.89   27.10
 -19  -9  -8   23.00   27.80
 -19   9  -8   29.50   29.90
 -21  -9  -8  202.98   33.60
 -21   9  -8  203.78   34.60
 -23  -9  -8   91.19   40.50
 -23   9  -8  109.49   37.70
 -22 -10   8   65.89   49.50
 -22 -10   8  143.99   28.00
 -22  10   8   88.89   30.80
 -20 -10   8  163.98   47.50
 -20 -10   8  202.28   25.10
 -20  10   8  187.48   33.00
 -18 -10   8  114.89   20.20
 -18 -10   8   88.69   42.00
 -18  10   8  131.99   26.40
 -16 -10   8  128.89   39.80
 -16 -10   8  157.98   17.60
 -16  10   8  147.89   25.20
 -14 -10   8   72.09   13.70
 -14 -10   8   67.79   35.70
 -14  10   8   86.39   21.20
 -12 -10   8  277.07   18.00
 -12  10   8  282.87   27.30
 -10 -10   8   42.40    7.50
 -10  10   8   52.89   18.30
  -8 -10   8  370.46   45.70
   8  10  -8  399.06   18.40
  -8  10   8  358.86   27.90
  -6 -10   8  455.05   47.00
  -6  10   8  426.16   29.50
  -4 -10   8  310.67   43.60
  -4  10   8  240.38   19.80
   4  10  -8  214.48   13.60
  -8 -10  -8  297.57   28.10
  -8  10  -8  331.57   26.70
 -10 -10  -8  858.51   45.10
 -10  10  -8  885.11   46.60
 -12 -10  -8 1147.19   56.69
 -12  10  -8 1100.49   57.99
 -14 -10  -8 1244.78   62.99
 -14  10  -8 1262.37   64.19
 -16 -10  -8  224.38   27.50
 -16  10  -8  238.28   30.50
 -18 -10  -8  185.48   28.90
 -18  10  -8  151.28   31.30
 -20 -10  -8   74.39   30.00
 -20  10  -8   88.79   32.80
 -22 -10  -8   56.09   34.00
 -22  10  -8   48.20   35.80
 -23 -11   8   59.79   54.19
 -23 -11   8  136.69   30.20
 -23  11   8  175.58   37.50
 -21 -11   8   30.50   47.50
 -21 -11   8   77.49   31.30
 -21  11   8   86.99   33.90
 -19 -11   8   62.49   43.70
 -19 -11   8  114.59   21.20
 -19  11   8   80.79   29.10
 -17 -11   8  175.98   44.90
 -17 -11   8  229.88   20.80
 -17  11   8  210.78   28.40
 -15 -11   8  470.65   27.40
 -15 -11   8  412.66   64.99
 -15  11   8  429.56   35.20
 -13 -11   8  484.25   25.70
 -13 -11   8  502.65   54.89
 -13  11   8  472.45   34.50
 -11 -11   8  513.55   24.70
 -11 -11   8  363.16   66.19
 -11  11   8  563.44   34.10
  -9 -11   8  542.05   52.59
  -9  11   8  517.65   34.60
   9  11  -8  593.74   26.80
  -7 -11   8  674.83   54.59
  -7  11   8  624.14   38.20
   7  11  -8  713.03   30.70
  -5  11   8  403.86   29.70
   5  11  -8  435.26   20.80
   3  11  -8   -4.90    9.00
  -3  11   8   23.20   17.30
  -1  11   8   11.10   18.30
   1  11  -8    9.10   11.20
  -3 -11  -8  524.75   30.50
  -3  11  -8  529.65   30.50
  -7 -11  -8  780.92   41.90
  -7  11  -8  843.32   42.50
  -9 -11  -8   85.69   18.50
  -9  11  -8   63.89   23.90
 -11 -11  -8   95.69   19.20
 -11  11  -8  104.09   21.80
 -13 -11  -8   26.10   21.90
 -13  11  -8    7.50   23.10
 -15 -11  -8   24.50   23.80
 -15  11  -8   31.90   26.00
 -17 -11  -8   49.40   26.60
 -17  11  -8   42.20   28.20
 -19 -11  -8    0.50   28.10
 -19  11  -8  -35.90   31.00
 -21 -11  -8   95.39   33.60
 -21  11  -8  101.29   36.10
 -22 -12   8   58.59   28.30
 -22 -12   8  -56.09   52.69
 -22  12   8   77.49   35.70
 -20 -12   8  109.29   24.50
 -20 -12   8   46.10   47.10
 -20  12   8   97.39   30.20
 -18 -12   8   70.79   46.70
 -18 -12   8   56.69   19.00
 -18  12   8  116.69   27.40
 -16 -12   8  113.49   42.80
 -16 -12   8  161.68   17.80
 -16  12   8  143.39   26.70
 -14 -12   8  169.68   43.00
 -14 -12   8  179.78   15.30
 -14  12   8  142.59   24.80
 -12 -12   8   15.00   36.20
 -12 -12   8   15.40   10.20
 -12  12   8   22.20   21.30
 -10 -12   8   71.89   39.60
 -10  12   8  107.39   21.10
  -8 -12   8   87.09   31.20
   8  12  -8  101.69    9.40
  -8  12   8   94.99   33.00
  -6 -12   8  298.67   46.20
  -6  12   8  277.57   24.20
   6  12  -8  275.87   16.10
  -4 -12   8 1886.71   99.89
  -4  12   8 1907.41   87.69
   4  12  -8 1962.30   84.19
  -2 -12   8 1730.03   84.89
  -2  12   8 1440.86   69.69
   2  12  -8 1412.76   67.69
  -4 -12  -8 1105.09   53.19
  -4  12  -8 1112.79   53.59
  -6 -12  -8   99.79   17.90
  -6  12  -8   53.79   17.30
  -8 -12  -8  573.74   33.60
  -8  12  -8  541.45   33.80
 -10 -12  -8  477.75   32.40
 -10  12  -8  496.55   34.60
 -12 -12  -8  453.25   33.80
 -12  12  -8  485.65   36.40
 -14 -12  -8  543.75   38.20
 -14  12  -8  523.65   40.00
 -16 -12  -8  384.36   37.20
 -16  12  -8  413.56   39.30
 -18 -12  -8  521.85   43.30
 -18  12  -8  491.45   43.90
 -20 -12  -8   53.59   32.30
 -20  12  -8   41.60   33.70
 -22 -12  -8   12.20   35.00
 -22  12  -8   40.20   36.70
 -23 -13   8  -11.40   57.89
 -21 -13   8   12.70   53.19
 -21  13   8  153.08   36.70
 -19 -13   8   32.60   21.50
 -19 -13   8  -11.90   47.20
 -19  13   8   15.70   29.50
 -17 -13   8   19.40   44.40
 -17 -13   8   35.80   17.20
 -17  13   8   72.49   27.00
 -15 -13   8   73.19   14.90
 -15 -13   8   52.69   39.00
 -15  13   8   69.09   25.20
 -13 -13   8  107.89   13.00
 -13 -13   8  104.59   41.40
 -13  13   8   91.69   24.90
 -11 -13   8  464.75   56.59
 -11  13   8  468.45   34.80
  -9 -13   8  611.14   64.99
  -9  13   8  619.04   38.90
   9  13  -8  685.13   31.40
  -7 -13   8  332.97   57.69
   7  13  -8  284.97   17.30
  -7  13   8  233.28   25.90
  -5  13   8  116.19   20.70
   3  13  -8  436.66   24.10
  -3  13   8  444.86   27.80
  -5 -13  -8  456.45   33.20
  -5  13  -8  492.95   29.60
  -7 -13  -8  597.44   35.30
  -7  13  -8  610.34   38.00
  -9 -13  -8   67.69   18.90
  -9  13  -8   55.89   20.50
 -11 -13  -8   -8.60   19.90
 -11  13  -8   -6.40   21.90
 -13 -13  -8    3.10   22.10
 -13  13  -8   -5.20   25.10
 -15 -13  -8   13.70   24.00
 -15  13  -8    8.60   25.90
 -17 -13  -8    3.00   26.50
 -17  13  -8   28.00   29.00
 -19 -13  -8   18.00   34.30
 -19  13  -8   40.00   32.80
 -21 -13  -8   31.40   34.60
 -21  13  -8   23.80   36.50
 -22 -14   8  -23.30   27.70
 -22  14   8   59.89   34.20
 -20 -14   8  -75.49   52.39
 -20 -14   8   -6.10   23.10
 -20  14   8   52.79   35.80
 -18 -14   8   -1.50   19.00
 -18 -14   8  -37.80   48.40
 -18  14   8    2.90   28.90
 -16 -14   8   74.29   47.20
 -16 -14   8   16.10   16.10
 -16  14   8    9.50   26.80
 -14 -14   8  -11.00   41.90
 -14 -14   8   17.30   12.80
 -14  14   8   20.50   25.40
 -12 -14   8   39.70   40.30
 -12  14   8   31.60   23.00
 -10 -14   8   56.19   34.80
 -10  14   8   91.89   23.00
  10  14  -8   67.09   12.10
  -8 -14   8   25.40   33.00
   8  14  -8   22.20   10.60
  -8  14   8   22.30   21.40
  -6 -14   8  139.39   44.00
  -6  14   8  168.88   23.50
   6  14  -8  202.78   16.00
  -4 -14   8  839.32   75.79
   4  14  -8  851.51   39.90
  -2  14   8  405.36   29.90
   2  14  -8  399.66   24.00
   0  14   8  570.74   32.50
   0  14  -8  553.64   31.40
  -6 -14  -8   96.69   18.20
  -6  14  -8   82.89   20.40
  -8 -14  -8   11.90   19.20
  -8  14  -8   77.79   19.90
 -10 -14  -8  150.88   22.40
 -10  14  -8  142.39   23.60
 -12 -14  -8   30.30   22.40
 -12  14  -8   39.90   23.90
 -14 -14  -8   68.89   24.90
 -14  14  -8   43.80   27.30
 -16 -14  -8   37.60   27.40
 -16  14  -8   52.89   29.20
 -18 -14  -8   50.29   29.90
 -18  14  -8   54.09   31.90
 -20 -14  -8   31.50   33.10
 -20  14  -8   58.09   35.30
 -21  15   8   58.19   34.80
 -19 -15   8  -75.19   52.59
 -19 -15   8   42.10   21.40
 -19  15   8   48.10   35.60
 -17 -15   8  -30.70   47.00
 -17 -15   8   15.00   17.70
 -17  15   8    6.60   29.40
 -15 -15   8  -35.00   39.30
 -15 -15   8    0.70   14.70
 -15  15   8   26.90   27.20
 -13 -15   8    2.70   43.60
 -13  15   8   21.80   25.80
 -11 -15   8   65.19   38.80
  11  15  -8  100.39   14.20
 -11  15   8   98.99   26.00
  -9 -15   8  378.46   58.19
   9  15  -8  431.76   24.70
  -9  15   8  415.76   34.50
  -7 -15   8  106.39   36.90
  -7  15   8   66.19   23.00
   7  15  -8   88.59   12.20
  -5 -15   8  189.78   38.90
  -5  15   8  156.78   23.90
   5  15  -8  162.88   14.30
   3  15  -8   51.59   12.70
  -3  15   8   61.49   21.20
  -1  15   8   78.39   25.30
   1 -15   8  778.12   81.19
  -1  15  -8  830.52   40.70
   1  15   8  755.32   48.00
  -3  15  -8  406.96   28.80
  -5 -15  -8  313.07   26.40
  -5  15  -8  300.77   25.30
  -7 -15  -8  190.58   21.90
  -9 -15  -8   43.30   20.40
  -9  15  -8   46.30   24.20
 -11 -15  -8  259.37   26.60
 -11  15  -8  256.27   28.30
 -13 -15  -8   23.00   23.60
 -13  15  -8   12.00   25.90
 -15 -15  -8  203.68   29.50
 -15  15  -8  220.18   31.40
 -17 -15  -8   14.60   33.10
 -17  15  -8   24.40   29.60
 -19 -15  -8   -0.40   36.10
 -19  15  -8   20.70   34.60
 -21 -15  -8   20.80   36.00
 -21  15  -8   42.20   36.00
 -20 -16   8   -6.20   24.10
 -20  16   8    5.80   34.50
 -18 -16   8  -15.30   19.50
 -18  16   8   18.50   30.50
 -16 -16   8  -54.89   49.60
 -16 -16   8    8.80   17.10
 -16  16   8   36.90   29.00
 -14 -16   8  -18.80   46.80
 -14  16   8    0.10   28.00
 -12 -16   8  -17.00   45.70
 -12  16   8   -6.20   25.50
  12  16  -8    5.40   14.60
 -10 -16   8   53.39   40.00
 -10  16   8   36.00   25.40
  10  16  -8   46.60   14.00
  -8 -16   8  139.69   41.10
  -8  16   8  130.19   25.80
   8  16  -8  146.59   14.90
  -6 -16   8  108.69   45.10
   6  16  -8   84.69   13.30
  -6  16   8   81.49   23.70
  -4  16   8  102.19   23.30
   4  16  -8   91.49   14.60
  -2  16   8  236.38   25.20
   2  16  -8  222.98   18.50
  -4  16  -8  158.68   20.90
  -6 -16  -8   48.70   19.50
  -6  16  -8   70.89   23.20
  -8 -16  -8   59.99   20.50
  -8  16  -8   76.19   21.50
 -10 -16  -8   15.50   21.50
 -10  16  -8    2.10   22.50
 -12 -16  -8   -8.20   22.10
 -12  16  -8   -4.90   24.40
 -14 -16  -8    3.10   26.10
 -14  16  -8    4.30   27.80
 -16 -16  -8    2.60   27.40
 -16  16  -8   30.40   30.00
 -18 -16  -8  -15.20   30.60
 -18  16  -8   14.40   34.50
 -20 -16  -8  107.29   36.00
 -20  16  -8   58.99   37.50
 -21  17   8   31.20   42.70
 -19 -17   8   18.70   23.00
 -19  17   8    2.60   34.00
 -17 -17   8  -12.10   18.60
 -17  17   8    1.40   30.80
 -15 -17   8  -80.59   50.89
 -15  17   8   20.10   29.60
 -13 -17   8   13.80   50.69
 -13  17   8   40.00   28.50
  13  17  -8   39.90   16.70
 -11 -17   8   61.49   48.70
 -11  17   8   14.30   26.40
  11  17  -8   49.50   15.20
  -9 -17   8  211.28   51.09
  -9  17   8  157.98   28.30
   9  17  -8  184.48   16.90
  -7 -17   8  119.69   49.99
  -7  17   8   28.50   24.60
   7  17  -8   21.10   13.70
  -5  17   8  278.17   29.50
   5  17  -8  339.67   23.50
  -3 -17   8  804.72   68.29
   3  17  -8  701.33   37.40
  -3  17   8  700.03   44.20
  -1  17   8   46.80   21.90
  -3  17  -8  443.46   31.20
   3  17   8  425.96   34.50
  -5  17  -8  419.76   29.90
  -7 -17  -8   78.69   20.70
  -7  17  -8   70.79   23.40
  -9 -17  -8   63.39   24.90
  -9  17  -8   68.09   23.40
 -11 -17  -8   -4.10   23.20
 -11  17  -8  -12.70   24.50
 -13 -17  -8   34.00   25.50
 -13  17  -8   45.40   27.60
 -15 -17  -8   -5.00   26.90
 -15  17  -8    0.80   29.80
 -17 -17  -8    5.80   34.00
 -17  17  -8   13.40   32.70
 -19 -17  -8   16.50   33.00
 -19  17  -8    7.00   35.50
 -20  18   8   23.60   37.30
 -18  18   8   37.60   37.90
 -16  18   8   33.60   32.10
 -14 -18   8  -55.89   55.09
 -14  18   8   33.40   30.90
  14  18  -8   10.30   18.20
 -12 -18   8   58.39   54.29
  12  18  -8   61.49   16.90
 -12  18   8   41.30   29.20
 -10 -18   8   79.69   54.19
  10  18  -8    6.20   15.90
 -10  18   8   40.30   27.70
  -8 -18   8  219.28   56.39
  -8  18   8  103.19   26.80
   8  18  -8  102.59   16.80
  -6  18   8   45.70   25.30
   6  18  -8   46.40   15.40
   4  18  -8  427.06   28.10
  -4  18   8  401.26   36.20
  -2  18   8  418.06   35.40
   2  18  -8  387.06   28.20
   0  18  -8  669.13   36.70
   0  18   8  658.23   42.50
   4  18   8   96.29   24.70
  -4  18  -8   86.29   21.50
  -6  18  -8   95.79   21.70
  -8 -18  -8   51.09   22.20
  -8  18  -8   58.19   23.10
 -10 -18  -8   24.50   23.40
 -10  18  -8   -4.10   24.30
 -12 -18  -8   39.80   25.20
 -12  18  -8   35.40   25.90
 -14 -18  -8   81.69   27.50
 -14  18  -8   54.29   29.40
 -16 -18  -8   33.90   30.00
 -16  18  -8   86.29   33.10
 -18 -18  -8   59.39   34.10
 -18  18  -8   67.29   35.10
 -19  19   8   26.20   36.50
 -17  19   8    5.60   34.50
 -15  19   8   43.50   32.10
  15  19  -8  -28.60   19.80
 -13 -19   8  161.48   57.69
  13  19  -8  258.67   21.70
 -13  19   8  250.77   34.10
 -11 -19   8  357.76   60.09
 -11  19   8  377.26   35.60
  11  19  -8  377.56   28.60
  -9 -19   8  250.07   60.39
   9  19  -8  105.49   18.30
  -9  19   8  104.69   29.30
  -7  19   8   75.99   27.70
   5  19  -8   85.19   17.10
  -5  19   8  120.49   27.50
  -3  19   8  263.27   24.90
   3  19  -8  214.48   20.70
   1  19  -8  192.78   21.20
  -1  19   8  185.68   28.50
   3  19   8  202.28   28.70
  -3  19  -8  203.38   21.80
   5  19   8   66.29   25.40
  -5  19  -8   66.79   24.00
  -7  19  -8   34.80   22.10
  -9 -19  -8  -19.70   26.40
  -9  19  -8   44.00   23.70
 -11 -19  -8   27.70   24.80
 -11  19  -8   16.40   29.80
 -13 -19  -8    3.70   30.40
 -13  19  -8   -3.30   29.00
 -15 -19  -8  -15.10   29.20
 -15  19  -8   16.50   31.90
 -17 -19  -8   13.70   37.50
 -17  19  -8   48.40   34.30
 -19 -19  -8   -8.20   35.50
 -19  19  -8    4.80   37.50
 -18  20   8   26.30   37.60
 -16  20   8    8.20   33.70
  16  20  -8  -50.09   20.80
 -14 -20   8 -135.99   67.19
  14  20  -8   35.20   19.40
 -14  20   8   50.59   33.80
 -12 -20   8   57.99   66.89
 -12  20   8   56.69   31.80
  12  20  -8  -23.10   18.70
 -10 -20   8   61.49   57.49
 -10  20   8   40.00   30.50
  10  20  -8    5.00   18.60
   8  20  -8   65.99   18.20
  -8  20   8   81.39   29.20
  -4  20   8   67.49   28.20
   2  20  -8  514.85   33.90
  -2  20   8  489.85   40.50
   0  20   8  322.47   31.90
   0  20  -8  300.37   28.20
  -2  20  -8   17.90   20.90
   2  20   8  -14.20   26.20
  -4  20  -8   17.00   20.30
   4  20   8   19.10   26.10
  -6  20  -8   23.40   25.00
   6  20   8   33.00   26.10
  -8  20  -8   49.90   27.90
 -10 -20  -8  273.77   29.70
 -10  20  -8  264.67   30.00
 -12 -20  -8  508.75   40.50
 -12  20  -8  503.85   43.10
 -14 -20  -8  417.56   41.00
 -14  20  -8  406.06   38.00
 -16 -20  -8   68.69   32.80
 -16  20  -8   99.99   39.70
 -18 -20  -8  -12.00   35.40
 -18  20  -8   -4.60   37.30
 -19  21   8   73.39   45.20
 -17  21   8   60.99   37.90
  15  21  -8  -21.40   20.30
 -15  21   8    4.50   35.50
 -13  21   8   68.09   33.50
  13  21  -8   29.30   21.10
 -11 -21   8  670.13   90.89
 -11  21   8  757.42   52.79
  11  21  -8  802.92   42.10
  -9 -21   8  452.15   78.89
   9  21  -8  314.07   30.50
  -9  21   8  308.97   36.10
   7  21  -8  220.58   21.30
  -7  21   8  210.68   31.90
   1  21   8   67.49   27.70
  -1  21  -8   40.70   20.60
   3  21   8   16.80   27.80
  -3  21  -8   25.20   22.80
   5  21   8   92.09   31.10
  -5  21  -8  -15.70   21.90
  -7  21  -8   47.80   24.20
  -9  21  -8   21.20   25.70
 -11 -21  -8   -2.70   27.10
 -11  21  -8   33.30   27.90
 -13 -21  -8   30.10   32.90
 -13  21  -8   52.49   31.50
 -15 -21  -8   34.90   32.60
 -15  21  -8  100.29   33.30
 -17 -21  -8  100.09   39.60
 -17  21  -8   79.89   37.30
 -18  22   8   12.40   40.80
 -16  22   8   11.50   38.50
 -14  22   8   67.09   37.10
  14  22  -8   33.20   21.70
 -12 -22   8  -40.90   82.69
 -12  22   8  152.58   36.70
  12  22  -8  175.28   22.60
 -10 -22   8   13.50   76.89
 -10  22   8   48.30   32.90
  10  22  -8  -15.50   20.30
  -8 -22   8  162.18   71.39
  -8  22   8    7.80   25.00
   8  22  -8   -8.90   19.90
  -6  22   8   42.40   30.60
   0  22  -8  228.88   25.10
   0  22   8  256.67   32.00
   2  22   8  -24.20   27.90
  -2  22  -8  -23.60   22.40
   4  22   8   32.60   28.40
  -4  22  -8   -4.00   22.50
   6  22   8   61.79   29.10
  -6  22  -8   19.80   24.00
  -8  22  -8   42.40   26.10
 -10  22  -8  305.37   32.90
 -12 -22  -8  435.96   41.80
 -12  22  -8  457.35   43.10
 -14 -22  -8  118.39   33.40
 -14  22  -8  150.48   35.30
 -16 -22  -8   14.60   34.00
 -16  22  -8    4.40   35.30
 -17  23   8  232.78   44.80
 -15  23   8  150.18   41.40
 -13  23   8   44.70   36.80
  13  23  -8   13.20   22.80
 -11 -23   8  -43.00   84.19
 -11  23   8  118.99   37.70
  11  23  -8  137.19   23.30
  -9 -23   8   46.20   76.59
  -9  23   8   30.00   34.00
   9  23  -8   51.89   22.00
   7  23  -8   62.69   22.00
  -7  23   8   49.90   26.20
  -1  23   8   55.49   32.30
   1  23  -8   52.49   22.30
   1  23   8  168.48   32.20
  -1  23  -8  165.68   25.90
  -3  23  -8   41.90   22.70
   3  23   8   41.60   30.00
   5  23   8    8.30   29.40
  -5  23  -8   24.30   27.30
   7  23   8  -29.10   30.00
  -7  23  -8   -5.70   29.10
  -9  23  -8  277.67   32.70
 -11  23  -8   44.40   30.20
 -13 -23  -8  -19.20   31.20
 -13  23  -8   34.00   33.10
 -15 -23  -8   58.39   34.80
 -15  23  -8   82.39   35.70
 -16  24   8   35.70   41.60
 -14  24   8   44.80   39.90
 -12  24   8   -2.60   37.60
  12  24  -8  -29.40   23.20
 -10 -24   8  -58.79   82.39
  10  24  -8   81.69   24.00
 -10  24   8   94.69   37.40
  -8 -24   8   83.49   94.09
  -8  24   8   59.09   36.30
   8  24  -8   87.99   23.10
  -6  24   8   39.50   33.20
   6  24  -8   71.39   22.70
  -4  24   8   74.89   35.00
  -2  24   8  204.58   35.30
   2  24  -8  216.48   27.50
   0  24  -8    7.70   24.40
   0  24   8  -34.00   31.60
  -2  24  -8   48.40   25.30
   2  24   8   48.80   31.00
  -4  24  -8  305.67   33.20
   4  24   8  346.37   37.00
   6  24   8  114.79   33.10
  -6  24  -8  124.89   30.80
  -8  24  -8  120.59   33.50
   8  24   8  198.98   34.10
 -10  24  -8   67.09   30.80
 -12  24  -8   80.49   33.50
 -14 -24  -8   14.10   33.60
 -14  24  -8   20.80   35.50
 -15  25   8  146.69   44.70
 -13  25   8   63.69   42.00
 -11  25   8   82.19   38.80
  11  25  -8   89.99   25.70
  -9 -25   8 -114.89   97.69
   9  25  -8   26.40   23.20
  -9  25   8   31.40   39.40
  -7 -25   8  116.69   87.89
  -7  25   8   65.09   34.60
   7  25  -8   40.70   24.50
  -5 -25   8  310.47   88.99
  -5  25   8   14.70   37.40
   5  25  -8   46.80   25.10
   3  25  -8   83.19   31.10
  -3  25   8   57.69   35.40
  -1  25   8   54.09   34.90
   1  25  -8  101.59   25.60
  -1  25  -8   38.70   26.30
   1  25   8   -6.20   33.00
   3  25   8   34.90   31.30
  -3  25  -8   18.60   28.60
   5  25   8   20.90   32.40
  -5  25  -8   14.20   26.20
   7  25   8   70.99   34.80
  -7  25  -8   90.59   29.40
  -9  25  -8   92.39   34.80
   9  25   8   61.09   33.50
 -11  25  -8   74.29   37.70
  11  25   8   80.99   35.00
 -13  25  -8   29.20   34.20
 -14  26   8  -82.49   43.10
 -12  26   8   97.69   42.00
  12  26  -8   69.29   34.40
 -10  26   8   33.20   39.80
  10  26  -8   16.10   25.10
  -8 -26   8 -187.48  106.79
   8  26  -8   49.90   25.40
  -8  26   8   42.40   37.80
  -6 -26   8   21.10   93.99
   6  26  -8   33.30   25.40
  -6  26   8   21.90   38.60
  -4  26   8   74.59   37.10
  -2  26   8   -6.60   35.60
   2  26  -8   23.60   25.60
   0  26  -8   -5.30   27.00
   0  26   8  -28.90   35.10
   2  26   8  297.77   39.30
  -2  26  -8  294.57   29.80
   4  26   8  487.85   47.60
  -4  26  -8  452.45   40.00
   6  26   8  613.54   52.79
  -6  26  -8  752.02   47.80
  -8  26  -8  115.89   32.10
   8  26   8  129.59   37.30
  10  26   8    4.80   35.60
 -10  26  -8    3.60   33.10
  12  26   8   79.89   37.30
 -12  26  -8  111.69   39.90
 -13  27   8  -31.50   45.80
  11  27  -8  -10.80   24.10
 -11  27   8  -32.90   44.80
   9  27  -8  -29.30   26.50
  -9  27   8   28.20   40.70
   7  27  -8   39.90   31.40
  -7  27   8    4.20   39.50
   5  27  -8   -1.10   25.60
  -5  27   8   -4.00   39.50
  -3  27   8   23.60   38.50
   3  27  -8   84.09   29.40
  -1  27   8   -3.40   37.60
   1  27  -8   46.20   28.80
  -1  27  -8    0.90   29.60
   1  27   8  -40.30   37.40
   3  27   8   -4.60   35.90
  -3  27  -8    3.40   30.80
   5  27   8  -25.00   40.10
  -5  27  -8   11.30   33.10
  -7  27  -8  136.39   36.60
   7  27   8  114.89   37.60
  -9  27  -8   70.69   33.60
   9  27   8   48.70   37.60
 -11  27  -8   88.79   36.40
  11  27   8  113.09   38.20
 -12  28   8   62.79   47.40
 -10  28   8   31.40   43.90
  10  28  -8  -15.40   44.00
  -8  28   8   74.59   44.70
  -6  28   8   65.19   43.40
   6  28  -8    5.70   27.90
  -4  28   8   55.49   41.70
   4  28  -8   13.80   27.80
  -2  28   8    0.10   40.00
   2  28  -8   17.50   30.40
   0  28   8   -6.30   39.40
   0  28  -8  -14.70   29.30
  -2  28  -8  105.39   32.20
   2  28   8  108.39   39.30
  -4  28  -8  347.77   35.40
   4  28   8  375.76   43.10
   6  28   8  317.07   41.50
  -6  28  -8  274.97   36.10
   8  28   8  136.59   39.60
  -8  28  -8  122.29   34.00
 -10  28  -8   81.39   41.80
  10  28   8   54.59   40.40
   9  29  -8  -20.70   28.90
  -9  29   8  -22.50   45.30
   7  29  -8  227.48   31.90
  -7  29   8  184.58   47.60
  -5  29   8  209.18   46.00
   5  29  -8  219.18   32.30
  -3  29   8   70.99   43.00
   3  29  -8   24.30   31.90
  -1  29   8  128.99   43.80
   1  29  -8   90.69   31.60
  -1  29  -8   48.50   31.00
   1  29   8    5.30   40.30
  -3  29  -8   28.00   33.70
   3  29   8  -24.10   38.60
  -5  29  -8   47.80   36.10
   5  29   8   24.30   39.50
  -7  29  -8   19.40   37.90
   7  29   8    7.60   38.80
   9  29   8   -9.20   40.00
  -9  29  -8   -8.00   36.20
   8  30  -8   42.20   32.20
  -8  30   8   66.19   47.70
  -6  30   8   65.29   45.10
   6  30  -8  -15.80   35.80
   4  30  -8   63.19   33.50
  -4  30   8   70.29   44.80
   2  30  -8    4.10   32.00
  -2  30   8   15.20   44.20
   0  30  -8   18.40   33.40
   0  30   8   19.90   43.00
  -2  30  -8   51.69   35.30
   2  30   8   37.80   42.10
   4  30   8   41.50   42.00
  -4  30  -8  107.09   37.80
   6  30   8   44.80   40.80
  -6  30  -8   88.79   34.30
  -5  31   8   36.10   45.70
   5  31  -8   35.10   34.40
  -3  31   8   17.00   45.50
   3  31  -8   55.89   36.10
  -1  31   8    5.10   46.00
   1  31  -8   25.60   34.60
   1  31   8   50.59   50.59
  -1  31  -8   35.50   36.40
  -3  31  -8   52.59   37.40
   3  31   8   -8.60   43.00
  -5  31  -8   63.69   34.30
   5  31   8   17.60   42.90
 -24   0   9   34.60   27.50
 -22   0   9   49.40   25.20
 -20   0   9   25.50   20.90
 -18   0   9   28.90   24.30
 -16   0   9    3.60   16.80
 -14   0   9   12.40   14.70
 -12   0   9    8.10   13.00
 -10   0   9    5.40   11.40
  -4   0   9   -5.60    7.90
   2   0  -9   12.20    7.70
   0   0  -9    4.10    7.90
   2   0   9   12.10   17.20
  -2   0  -9   -7.30    9.40
  -4   0  -9   -0.30   11.60
   4   0   9   34.90   16.20
   8   0   9 1563.64   73.59
 -10   0  -9    3.80   16.10
 -12   0  -9  -17.10   17.80
 -14   0  -9  -15.40   20.50
 -16   0  -9   10.90   18.30
 -18   0  -9   -4.60   25.10
 -20   0  -9   11.90   28.70
 -22   0  -9   14.10   32.80
 -23  -1   9   -1.50   25.70
 -23   1   9   37.50   23.80
 -21  -1   9   68.39   24.10
 -21   1   9   49.99   24.60
 -19  -1   9   14.50   19.20
 -19   1   9   16.50   21.50
 -17  -1   9   23.90   17.80
 -17   1   9   -7.00   21.70
 -15  -1   9   26.70   16.30
 -15   1   9   26.10   17.00
 -13  -1   9   10.70   14.00
 -13   1   9    6.40   14.80
 -11  -1   9  339.67   20.90
 -11   1   9  336.17   23.70
  -7  -1   9  682.13   32.40
  -7   1   9  674.63   32.90
  -5  -1   9  136.69   12.10
  -5   1   9  151.78   13.70
  -3   1   9   53.09    9.70
   1  -1  -9  128.19   11.40
   1   1  -9  150.48   11.60
  -1  -1  -9  184.28   14.10
   1  -1   9  173.18   26.20
  -1   1  -9  181.28   13.50
  -3  -1  -9  285.77   19.50
   3  -1   9  307.07   29.80
   3   1   9  341.27   30.30
  -3   1  -9  289.77   18.80
  -5  -1  -9   53.89   13.20
  -5   1  -9   59.39   13.10
   7   1   9  548.15   31.90
  -9  -1  -9  318.37   24.40
  -9   1  -9  346.27   25.30
 -11  -1  -9   -2.60   16.80
 -11   1  -9   26.00   17.00
 -13  -1  -9   32.10   15.30
 -13   1  -9   33.80   20.10
 -15  -1  -9   41.50   21.70
 -15   1  -9   53.19   22.40
 -17  -1  -9    3.40   23.60
 -17   1  -9    5.90   24.50
 -19  -1  -9  -15.90   26.70
 -19   1  -9    7.60   27.90
 -21  -1  -9   60.89   31.10
 -21   1  -9   72.49   31.90
 -23  -1  -9   39.80   35.30
 -23   1  -9   36.30   35.50
 -24  -2   9   36.20   27.40
 -24  -2   9   58.19   45.70
 -24   2   9    6.00   29.20
 -22  -2   9   41.20   24.50
 -22   2   9   84.29   24.10
 -20  -2   9   51.29   21.80
 -20   2   9   62.09   21.20
 -18  -2   9   17.40   18.70
 -18   2   9   26.10   20.80
 -16  -2   9  117.29   18.40
 -16   2   9  116.49   18.00
 -14  -2   9   55.79   15.10
 -14   2   9   70.99   17.30
 -12  -2   9   15.30   12.30
 -12   2   9   -4.20   14.40
 -10  -2   9    7.40   10.30
 -10   2   9   15.40   13.10
  -8   2   9  333.17   21.70
  -6  -2   9  311.17   17.70
  -6   2   9  341.37   20.50
  -4  -2   9  126.89   10.60
  -4   2   9  147.59   12.30
  -2  -2   9  391.56   36.90
   2   2  -9  464.15   21.20
   0  -2  -9  150.68   13.10
   0  -2   9  131.19   22.40
   0   2  -9  150.38   12.30
  -2  -2  -9  143.79   12.70
   2  -2   9  109.39   20.20
  -2   2  -9  139.19   12.20
   4  -2   9   18.70   16.50
  -4  -2  -9   15.80   11.90
  -4   2  -9   16.90   11.30
   4   2   9   18.60   15.70
  -6  -2  -9  126.79   15.80
   6   2   9  169.08   22.60
  -6   2  -9  105.99   15.70
   8   2   9  749.33   37.80
 -10  -2  -9   -1.40   14.60
 -10   2  -9  -16.10   16.80
 -12  -2  -9  152.08   20.10
 -12   2  -9  144.29   20.80
 -14  -2  -9  108.69   21.30
 -14   2  -9   59.19   21.80
 -16  -2  -9  138.69   24.60
 -16   2  -9  103.29   24.40
 -18  -2  -9   52.99   25.80
 -18   2  -9   37.50   26.20
 -20  -2  -9   65.09   29.60
 -20   2  -9   48.50   29.30
 -22  -2  -9   13.10   31.60
 -22   2  -9   12.50   34.00
 -23  -3   9   40.70   45.40
 -23  -3   9   43.70   27.10
 -23   3   9   60.09   28.30
 -21  -3   9   21.30   42.70
 -21  -3   9   28.20   22.00
 -21   3   9   51.69   23.30
 -19  -3   9    7.40   32.70
 -19   3   9  -13.10   22.50
 -17  -3   9   45.00   17.40
 -17   3   9   21.00   18.10
 -15  -3   9   80.99   15.90
 -15   3   9   84.89   19.00
 -13  -3   9   66.39   13.20
 -13   3   9   69.39   17.10
 -11  -3   9  249.18   18.20
 -11   3   9  270.97   19.80
  -9  -3   9  333.87   19.70
  -9   3   9  393.86   23.90
  -7  -3   9  307.77   17.00
  -7   3   9  334.17   20.00
  -5  -3   9    4.50    6.30
  -5  -3   9  -14.70   22.60
  -5   3   9   -5.10   11.50
  -3  -3   9  -10.70   20.60
  -3   3   9    4.80    9.90
   1  -3  -9  920.01   42.70
  -1  -3   9  936.71   52.89
   1   3  -9  905.81   41.20
  -1  -3  -9  128.99   12.50
   1  -3   9  107.19   21.70
  -1   3  -9  150.28   12.60
  -3  -3  -9  236.28   18.00
   3  -3   9  211.68   29.90
  -3   3  -9  224.58   18.10
  -5  -3  -9  570.44   30.60
  -5   3  -9  554.24   29.60
   5   3   9  556.54   34.80
  -9  -3  -9  649.43   35.00
  -9   3  -9  627.94   35.20
 -11  -3  -9   31.00   16.60
 -11   3  -9   10.40   14.30
 -13  -3  -9  127.59   20.90
 -13   3  -9  128.19   21.70
 -15  -3  -9  211.68   24.70
 -15   3  -9  222.08   22.60
 -17  -3  -9   -2.00   19.00
 -17   3  -9   -1.30   23.80
 -19  -3  -9   72.59   27.40
 -19   3  -9  113.89   24.40
 -21  -3  -9   63.39   30.00
 -21   3  -9   82.59   32.70
 -23  -3  -9   29.30   33.40
 -23   3  -9   45.50   35.90
 -24  -4   9   12.60   29.50
 -24  -4   9   21.60   48.30
 -24   4   9   16.70   31.20
 -22  -4   9   33.50   24.50
 -22  -4   9   40.90   43.20
 -22   4   9   37.70   24.40
 -20  -4   9  191.98   24.00
 -20  -4   9  185.88   43.40
 -20   4   9  192.08   27.50
 -18  -4   9  211.98   21.60
 -18  -4   9  162.98   41.00
 -18   4   9  182.48   25.10
 -16  -4   9   17.90   34.90
 -16   4   9   31.60   18.10
 -14  -4   9   11.80   29.80
 -14  -4   9   43.50   13.50
 -14   4   9   34.90   18.30
 -12  -4   9   16.80   26.70
 -12  -4   9   16.70   11.20
 -12   4   9   39.70   16.50
 -10  -4   9   -1.80    9.20
 -10  -4   9   -6.50   28.00
 -10   4   9   16.60   14.90
  -8  -4   9  392.06   20.20
  -8  -4   9  382.26   42.80
  -8   4   9  458.75   25.90
  -6  -4   9  203.48   37.20
  -6  -4   9  221.68   11.50
  -4  -4   9  499.35   42.00
  -4  -4   9  446.56   21.10
  -4   4   9  466.95   26.20
  -2  -4   9  775.42   49.60
   2   4  -9  757.62   34.30
   0  -4   9   17.70   19.60
   0  -4  -9   35.30   10.60
   0   4  -9   32.00    8.10
   2  -4   9  177.88   27.90
  -2  -4  -9  167.28   16.30
  -2   4  -9  160.18   15.30
  -4  -4  -9  132.29   15.00
  -4   4  -9  139.99   15.00
  -8  -4  -9    7.80   11.90
  -8   4  -9    6.60   15.20
 -10   4  -9  101.19   21.60
 -12  -4  -9  131.79   20.60
 -12   4  -9  118.59   17.60
 -14  -4  -9  160.28   22.90
 -14   4  -9  169.88   23.70
 -16  -4  -9  104.79   23.40
 -16   4  -9   94.39   25.30
 -18  -4  -9    1.80   24.10
 -18   4  -9   14.80   26.40
 -20  -4  -9   35.20   29.00
 -20   4  -9   23.30   29.40
 -22  -4  -9   36.40   32.20
 -22   4  -9   34.70   33.70
 -23  -5   9   72.29   46.20
 -23  -5   9    5.10   25.90
 -23   5   9   49.20   27.30
 -21  -5   9   20.20   22.50
 -21  -5   9   15.70   43.00
 -21   5   9   39.90   24.70
 -19  -5   9   31.60   19.30
 -19  -5   9   14.40   38.90
 -19   5   9   14.00   24.70
 -17  -5   9  399.46   28.80
 -17  -5   9  385.76   53.29
 -17   5   9  348.07   33.60
 -15  -5   9   42.10   15.00
 -15  -5   9   30.00   34.60
 -15   5   9   67.99   36.40
 -13  -5   9  125.69   13.90
 -13   5   9   97.69   17.40
 -11  -5   9   61.09   30.90
 -11  -5   9   74.69   10.50
 -11   5   9   89.09   17.40
  -9  -5   9  126.99   31.00
  -9   5   9  132.29   15.40
  -7  -5   9  854.01   57.79
  -7   5   9  907.21   43.50
  -5  -5   9  129.39   26.90
  -5   5   9  148.69   16.00
  -3  -5   9   40.00   23.20
  -3   5   9   18.80   14.40
   3   5  -9   63.29    6.20
  -1  -5   9   20.70   21.40
   1  -5  -9   12.40   10.70
   1   5  -9    3.80    6.80
   1  -5   9   43.70   19.90
  -1  -5  -9   32.40   12.00
  -1   5  -9   26.00    9.80
  -3  -5  -9  434.86   25.30
  -3   5  -9  429.86   23.50
  -5  -5  -9 1735.93   78.69
  -5   5  -9 1757.62   78.19
  -9  -5  -9  416.66   27.70
  -9   5  -9  418.86   28.20
 -11  -5  -9   94.99   18.10
 -11   5  -9   88.79   19.70
 -13  -5  -9   69.39   20.40
 -13   5  -9   75.09   22.00
 -15  -5  -9  121.39   24.30
 -15   5  -9  140.89   24.80
 -17  -5  -9  101.89   25.50
 -17   5  -9   93.49   27.10
 -19  -5  -9  110.99   27.80
 -21  -5  -9   50.39   30.90
 -21   5  -9   25.60   32.80
 -23  -5  -9   74.19   33.90
 -23   5  -9   28.40   34.60
 -24  -6   9   41.10   29.40
 -24  -6   9   18.00   47.50
 -24   6   9   59.79   33.40
 -22  -6   9   13.70   25.50
 -22  -6   9   46.80   43.90
 -22   6   9   40.80   31.30
 -20  -6   9   16.60   42.80
 -20  -6   9   19.50   31.50
 -20   6   9   22.30   23.40
 -18  -6   9  212.98   43.30
 -18  -6   9  256.67   23.00
 -16  -6   9   -8.90   15.80
 -16  -6   9    1.30   36.30
 -16   6   9   11.40   19.30
 -14  -6   9   65.29   34.30
 -14  -6   9   84.69   14.60
 -14   6   9   86.79   32.80
 -12  -6   9   62.29   11.50
 -12  -6   9   26.30   32.50
 -12   6   9   45.50   18.00
 -10  -6   9  197.38   13.40
 -10  -6   9  163.68   30.60
 -10   6   9  197.38   18.10
  -8  -6   9  191.68   30.70
  -8   6   9  299.57   23.10
  -6  -6   9  306.17   41.70
  -6   6   9  379.16   23.40
  -4  -6   9  293.77   39.50
  -4   6   9  311.57   23.70
  -2  -6   9  412.56   40.80
  -2   6   9  396.86   26.80
   2   6  -9  403.66   19.40
   0  -6  -9  170.58   16.90
   0  -6   9  188.28   33.70
   0   6  -9  152.58   13.20
  -2  -6  -9   29.30   13.00
  -2   6  -9   -0.50   10.60
  -8  -6  -9  161.68   18.20
  -8   6  -9  181.78   19.30
 -10  -6  -9  162.18   19.90
 -12  -6  -9   99.19   20.40
 -12   6  -9  119.69   21.20
 -14  -6  -9   62.69   17.90
 -14   6  -9   65.39   19.10
 -16  -6  -9   60.29   23.70
 -16   6  -9   79.69   25.00
 -18  -6  -9    8.00   25.00
 -18   6  -9    9.20   27.50
 -20  -6  -9   40.90   29.20
 -20   6  -9   54.09   30.30
 -22  -6  -9   51.99   33.40
 -22   6  -9   39.50   34.00
 -23  -7   9   29.60   46.70
 -23  -7   9   57.39   27.20
 -23   7   9   48.40   28.90
 -21  -7   9   36.00   23.10
 -21  -7   9    7.80   43.50
 -21   7   9   37.20   28.70
 -19  -7   9  107.09   20.60
 -19  -7   9   72.19   43.20
 -19   7   9   85.19   24.10
 -17  -7   9   68.89   17.60
 -17  -7   9   41.40   39.60
 -17   7   9   55.69   22.10
 -15  -7   9  -13.10   34.80
 -15  -7   9   12.50   14.50
 -15   7   9   13.30   19.30
 -13  -7   9   -7.60   11.70
 -13  -7   9  -11.60   33.40
 -13   7   9   22.40   23.30
 -11  -7   9  208.98   14.50
 -11  -7   9  161.48   31.90
 -11   7   9  219.78   21.50
  -9  -7   9  171.98    9.70
  -9  -7   9  145.89   32.60
  -9   7   9  179.58   18.00
  -7  -7   9  566.44   54.59
  -7   7   9  569.94   31.70
  -5  -7   9   44.50   25.90
  -5   7   9   47.40   16.80
  -3  -7   9  521.55   45.00
  -3   7   9  528.05   31.00
   3   7  -9  495.95   22.70
  -1  -7   9  305.37   43.40
   1   7  -9  216.88   14.40
  -1  -7  -9  253.07   19.50
  -1   7  -9  224.78   16.40
  -9   7  -9   87.19   18.60
 -11  -7  -9   10.30   18.30
 -11   7  -9   25.80   20.00
 -13  -7  -9   10.80   19.50
 -13   7  -9   10.30   21.80
 -15  -7  -9    3.30   22.40
 -15   7  -9   -1.30   19.70
 -17  -7  -9  367.06   35.30
 -17   7  -9  367.66   33.90
 -19   7  -9   82.89   29.70
 -21  -7  -9   42.00   31.20
 -21   7  -9   39.50   32.40
 -23  -7  -9   46.10   35.20
 -23   7  -9   -2.50   38.10
 -24  -8   9   61.39   50.09
 -24  -8   9   53.39   30.50
 -24   8   9   72.59   37.20
 -22  -8   9   19.50   47.00
 -22  -8   9   38.90   25.60
 -22   8   9   40.50   32.20
 -20  -8   9   33.50   21.60
 -20  -8   9   19.50   43.70
 -20   8   9   46.40   25.60
 -18  -8   9  171.28   20.80
 -18  -8   9  239.48   44.90
 -18   8   9  173.28   25.50
 -16  -8   9  -15.70   15.70
 -16  -8   9   -0.40   37.30
 -16   8   9   23.40   22.00
 -14  -8   9   12.90   12.80
 -14  -8   9   21.80   34.40
 -14   8   9  -14.40   18.80
 -12  -8   9  102.89   38.40
 -12  -8   9  134.29   11.80
 -12   8   9  120.89   19.70
 -10  -8   9  121.09    9.60
 -10  -8   9  105.29   30.30
 -10   8   9  137.99   18.00
  -8  -8   9   64.39   27.70
  -8   8   9   80.59   16.70
  -6  -8   9  387.76   44.90
  -6   8   9  372.46   25.90
  -4  -8   9  347.67   42.60
  -4   8   9  318.97   24.20
  -2  -8   9  311.57   40.70
   2   8  -9  256.77   14.90
  -2   8   9  259.37   22.90
   0   8  -9  331.47   19.30
  -2  -8  -9   17.50   13.40
  -2   8  -9   -1.10   12.10
  -8  -8  -9   31.90   16.10
  -8   8  -9   35.20   16.90
 -10  -8  -9  113.69   19.70
 -10   8  -9  158.48   20.50
 -12  -8  -9  238.18   23.80
 -12   8  -9  216.58   24.70
 -14  -8  -9    6.40   22.40
 -14   8  -9  -14.00   22.90
 -16  -8  -9   23.00   24.50
 -16   8  -9   44.40   26.60
 -18  -8  -9   26.90   26.60
 -18   8  -9   -1.20   27.80
 -20  -8  -9   45.60   30.20
 -20   8  -9   92.79   32.20
 -22  -8  -9   73.59   33.90
 -22   8  -9   65.89   36.70
 -23  -9   9   56.19   49.20
 -23  -9   9  130.19   28.70
 -23   9   9  162.18   32.20
 -21  -9   9   62.79   45.70
 -21   9   9   68.49   28.20
 -19  -9   9   46.40   20.10
 -19  -9   9   23.10   41.70
 -19   9   9   53.29   25.50
 -17  -9   9   67.79   17.00
 -17  -9   9   80.99   41.00
 -17   9   9   94.69   26.70
 -15  -9   9  -11.90   32.60
 -15  -9   9   -1.40   14.00
 -15   9   9   16.30   21.50
 -13  -9   9   49.00   35.90
 -13  -9   9   64.69   11.10
 -13   9   9   41.40   19.90
 -11  -9   9   61.19    8.20
 -11   9   9   97.69   19.40
  -9  -9   9   55.39   29.40
  -9   9   9   75.89   19.80
  -7  -9   9   35.80   28.30
  -7   9   9   34.10   16.80
  -5  -9   9  624.24   50.89
  -5   9   9  602.54   34.50
  -3  -9   9  107.79   27.90
   3   9  -9   52.19    6.60
  -3   9   9   75.29   16.30
  -1   9   9   96.69   17.60
   1   9  -9   67.09    9.60
  -1  -9  -9  356.56   23.80
  -1   9  -9  322.47   21.80
  -5  -9  -9  518.75   28.00
  -5   9  -9  510.45   31.40
  -7  -9  -9  405.46   27.20
  -7   9  -9  394.46   30.10
  -9  -9  -9  240.38   24.30
  -9   9  -9  244.78   33.50
 -11  -9  -9  193.78   22.10
 -11   9  -9  216.58   23.70
 -13  -9  -9  149.88   23.30
 -13   9  -9  185.58   25.00
 -15  -9  -9   38.90   23.30
 -15   9  -9   45.10   24.70
 -17  -9  -9  266.27   30.40
 -17   9  -9  257.97   31.90
 -19  -9  -9   63.39   29.90
 -19   9  -9   73.59   31.80
 -21  -9  -9  115.09   34.60
 -21   9  -9   82.29   35.10
 -22 -10   9   12.50   50.49
 -22 -10   9   34.30   26.20
 -22  10   9   34.90   30.10
 -20 -10   9  467.15   34.60
 -20 -10   9  393.86   73.19
 -20  10   9  392.36   38.40
 -18 -10   9  789.12   78.49
 -18 -10   9  826.72   43.20
 -18  10   9  733.83   47.70
 -16 -10   9  337.07   25.30
 -16 -10   9  363.06   65.19
 -16  10   9  346.47   32.20
 -14 -10   9   63.99   12.50
 -14 -10   9   55.79   33.50
 -14  10   9   79.59   21.70
 -12 -10   9  144.09   13.10
 -12 -10   9  138.19   34.50
 -12  10   9  178.08   21.70
 -10  10   9   13.20   21.00
  -8 -10   9   20.00   28.90
  -8  10   9   40.40   17.60
  -6 -10   9  340.17   45.90
  -6  10   9  283.07   25.40
  -4 -10   9  564.74   49.60
  -4  10   9  507.05   31.50
   4  10  -9  490.45   23.00
  -2 -10   9  995.40   60.89
  -2  10   9  862.41   45.10
   2  10  -9  837.22   40.60
   0 -10   9 1524.25   74.79
   0  10  -9 1120.59   58.79
  -2 -10  -9 1777.62   83.99
  -2  10  -9 1949.90   83.29
  -6 -10  -9  356.76   25.60
  -6  10  -9  350.36   28.00
  -8 -10  -9   50.79   17.20
  -8  10  -9   78.89   18.80
 -10 -10  -9   80.79   19.30
 -10  10  -9   68.59   20.00
 -12 -10  -9  124.49   21.70
 -12  10  -9  125.39   23.60
 -14 -10  -9   41.90   22.70
 -14  10  -9   56.49   24.80
 -16 -10  -9    8.50   25.00
 -16  10  -9   35.00   27.30
 -18 -10  -9   23.00   27.40
 -18  10  -9    1.50   28.70
 -20 -10  -9   43.10   32.00
 -20  10  -9   29.00   32.80
 -22 -10  -9   66.59   36.30
 -22  10  -9   80.79   36.80
 -23 -11   9   66.29   54.79
 -23 -11   9  163.48   29.80
 -23  11   9  143.79   34.20
 -21 -11   9   98.99   49.30
 -21 -11   9  172.68   25.00
 -21  11   9  174.38   35.40
 -19 -11   9   74.59   21.10
 -19 -11   9   55.59   45.10
 -19  11   9  130.29   28.90
 -17 -11   9   -3.90   16.40
 -17 -11   9    3.90   43.60
 -17  11   9   13.50   24.90
 -15 -11   9    4.00   13.10
 -15 -11   9   22.50   40.30
 -15  11   9   16.90   22.80
 -13 -11   9   35.20   10.30
 -13 -11   9   56.79   33.50
 -13  11   9   48.60   22.30
 -11 -11   9    8.20   30.60
 -11  11   9  -10.00   22.60
  -9 -11   9  165.18   58.59
  -7 -11   9  553.34   53.19
  -7  11   9  549.45   34.10
  -5 -11   9  117.49   30.30
   5  11  -9   79.89    6.60
  -5  11   9   82.49   18.80
   3  11  -9  122.49   12.50
  -3  11   9  144.59   19.00
  -1 -11   9 1328.17   71.09
   1  11  -9 1097.79   52.39
  -1  11   9 1042.80   55.89
  -5 -11  -9 1702.63   82.59
   5 -11   9 1904.11   94.49
  -5  11  -9 1858.21   83.29
  -7 -11  -9 1499.65   71.19
  -7  11  -9 1554.94   70.99
  -9 -11  -9  464.75   31.50
  -9  11  -9  470.05   32.40
 -11 -11  -9    4.00   19.90
 -11  11  -9    8.90   21.80
 -13 -11  -9   42.10   21.60
 -13  11  -9   29.30   24.00
 -15 -11  -9   14.20   25.20
 -15  11  -9   22.60   25.60
 -17 -11  -9  177.48   28.80
 -17  11  -9  157.08   30.70
 -19 -11  -9  266.37   33.90
 -19  11  -9  212.98   33.40
 -21 -11  -9  218.58   35.70
 -21  11  -9  210.98   38.10
 -22 -12   9   15.80   54.09
 -22  12   9   84.09   36.50
 -20 -12   9  632.14   38.90
 -20 -12   9  509.25   79.89
 -20  12   9  525.05   45.60
 -18 -12   9 1130.19   53.39
 -18 -12   9  991.00   89.09
 -18  12   9 1062.39   62.99
 -16 -12   9  614.84   33.10
 -16 -12   9  628.24   73.59
 -16  12   9  572.64   45.90
 -14 -12   9  154.78   13.90
 -14 -12   9  138.49   43.40
 -14  12   9  147.89   25.50
 -12 -12   9    0.80   38.50
 -12  12   9    0.30   22.00
 -10 -12   9   78.09   33.60
 -10  12   9   46.60   20.40
  10  12  -9   71.89    8.20
  -8 -12   9   63.99   39.10
  -8  12   9   56.49   24.30
  -6 -12   9  321.67   47.70
   6  12  -9  345.07   16.10
  -6  12   9  341.27   28.40
  -4 -12   9  480.45   50.39
  -4  12   9  394.56   29.70
   4  12  -9  392.06   21.30
  -2  12   9  183.48   21.10
   2  12  -9  160.68   15.80
   0  12  -9  327.67   20.90
   0  12   9  330.87   23.30
  -4 -12  -9  566.94   30.90
  -4  12  -9  578.24   33.40
  -8 -12  -9  704.53   35.80
  -8  12  -9  557.74   58.59
 -10 -12  -9  393.36   30.90
 -10  12  -9  404.66   31.70
 -12 -12  -9  102.09   23.60
 -12  12  -9  111.89   23.60
 -14 -12  -9  271.67   29.10
 -14  12  -9  288.07   29.70
 -16 -12  -9   30.70   26.60
 -16  12  -9   30.50   27.50
 -18 -12  -9   26.20   28.70
 -18  12  -9   23.70   30.10
 -20 -12  -9    3.40   31.30
 -20  12  -9   17.20   32.80
 -22 -12  -9   41.20   41.80
 -22  12  -9   48.50   37.10
 -21 -13   9   24.00   52.69
[truncated: 1,041,865 more chars]
