# Supplementary material
Source: MDPI journal article supplement (https://www.mdpi.com/2304-6740/5/4/73)
Supplement: s1 [file s1 › inorganics-233055-Supplementary/FF471_0m_a_sq.cif]

 
data_FF471_0m_a_sq
 
_audit_creation_method            'SHELXL-2014/7'
_shelx_SHELXL_version_number      '2014/7'
_chemical_name_systematic         ?
_chemical_name_common             ?
_chemical_melting_point           ?
_chemical_formula_moiety          ?
_chemical_formula_sum
 'C69 H45 F18 N5 P4 Ru' 
_chemical_formula_weight          1511.05

loop_
 _atom_type_symbol
 _atom_type_description
 _atom_type_scat_dispersion_real
 _atom_type_scat_dispersion_imag
 _atom_type_scat_source
 'C'  'C'   0.0033   0.0016
 'International Tables Vol C Tables 4.2.6.8 and 6.1.1.4'
 'H'  'H'   0.0000   0.0000
 'International Tables Vol C Tables 4.2.6.8 and 6.1.1.4'
 'N'  'N'   0.0061   0.0033
 'International Tables Vol C Tables 4.2.6.8 and 6.1.1.4'
 'F'  'F'   0.0171   0.0103
 'International Tables Vol C Tables 4.2.6.8 and 6.1.1.4'
 'P'  'P'   0.1023   0.0942
 'International Tables Vol C Tables 4.2.6.8 and 6.1.1.4'
 'Ru'  'Ru'  -1.2594   0.8363
 'International Tables Vol C Tables 4.2.6.8 and 6.1.1.4'
 
_space_group_crystal_system       monoclinic
_space_group_IT_number            14
_space_group_name_H-M_alt         'P 21/c'
_space_group_name_Hall            '-P 2ybc'
 
_shelx_space_group_comment
;
The symmetry employed for this shelxl refinement is uniquely defined
by the following loop, which should always be used as a source of
symmetry information in preference to the above space-group names.
They are only intended as comments.
;
 
loop_
 _space_group_symop_operation_xyz
 'x, y, z'
 '-x, y+1/2, -z+1/2'
 '-x, -y, -z'
 'x, -y-1/2, z-1/2'
 
_cell_length_a                    14.2851(6)
_cell_length_b                    18.9090(8)
_cell_length_c                    29.8721(12)
_cell_angle_alpha                 90
_cell_angle_beta                  97.011(2)
_cell_angle_gamma                 90
_cell_volume                      8008.6(6)
_cell_formula_units_Z             4
_cell_measurement_temperature     150(2)
_cell_measurement_reflns_used     9441
_cell_measurement_theta_min       2.3650
_cell_measurement_theta_max       26.3776
 
_exptl_crystal_description        block
_exptl_crystal_colour             'dark-red'
_exptl_crystal_density_meas       ?
_exptl_crystal_density_method     ?
_exptl_crystal_density_diffrn     1.253          
_exptl_crystal_F_000              3040
_exptl_transmission_factor_min    ?
_exptl_transmission_factor_max    ?
_exptl_crystal_size_max           0.621
_exptl_crystal_size_mid           0.406
_exptl_crystal_size_min           0.362
_exptl_absorpt_coefficient_mu     0.356
_shelx_estimated_absorpt_T_min    0.809
_shelx_estimated_absorpt_T_max    0.882
_exptl_absorpt_correction_type    multi-scan
_exptl_absorpt_correction_T_min   0.72
_exptl_absorpt_correction_T_max   0.88
_exptl_absorpt_process_details    'SADABS V2014/5 (Bruker AXS Inc.)'
_exptl_absorpt_special_details    ?
_diffrn_ambient_temperature       150(2)
_diffrn_radiation_wavelength      0.71073
_diffrn_radiation_type            MoK\a
_diffrn_source                    'sealed tube'
_diffrn_measurement_device_type   'Bruker D8 Quest ECO PHOTON 50'
_diffrn_measurement_method        ?
_diffrn_detector_area_resol_mean  ?
_diffrn_reflns_number             111783
_diffrn_reflns_av_unetI/netI      0.0442
_diffrn_reflns_av_R_equivalents   0.0702
_diffrn_reflns_limit_h_min        -17
_diffrn_reflns_limit_h_max        17
_diffrn_reflns_limit_k_min        -23
_diffrn_reflns_limit_k_max        23
_diffrn_reflns_limit_l_min        -37
_diffrn_reflns_limit_l_max        37
_diffrn_reflns_theta_min          2.261
_diffrn_reflns_theta_max          26.450
_diffrn_reflns_theta_full         25.242
_diffrn_measured_fraction_theta_max   0.983
_diffrn_measured_fraction_theta_full  0.996
_diffrn_reflns_Laue_measured_fraction_max    0.983
_diffrn_reflns_Laue_measured_fraction_full   0.996
_diffrn_reflns_point_group_measured_fraction_max   0.983
_diffrn_reflns_point_group_measured_fraction_full  0.996
_reflns_number_total              16240
_reflns_number_gt                 12710
_reflns_threshold_expression      'I > 2\s(I)'
_reflns_Friedel_coverage          0.000
_reflns_Friedel_fraction_max      .
_reflns_Friedel_fraction_full     .
 
_reflns_special_details
;
 Reflections were merged by SHELXL according to the crystal
 class for the calculation of statistics and refinement.
 
 Structure factors included contributions from the .fab file.
 
 _reflns_Friedel_fraction is defined as the number of unique
 Friedel pairs measured divided by the number that would be
 possible theoretically, ignoring centric projections and
 systematic absences.
;
 
_computing_data_collection        ?
_computing_cell_refinement        ?
_computing_data_reduction         ?
_computing_structure_solution     ?
_computing_structure_refinement 'SHELXL-2014/7 (Sheldrick, 2014)'
_computing_molecular_graphics     ?
_computing_publication_material   ?
_refine_special_details           ?
_refine_ls_structure_factor_coef  Fsqd
_refine_ls_matrix_type            full
_refine_ls_weighting_scheme       calc
_refine_ls_weighting_details
'w=1/[\s^2^(Fo^2^)+(0.1000P)^2^] where P=(Fo^2^+2Fc^2^)/3'
_atom_sites_solution_primary      ?
_atom_sites_solution_secondary    ?
_atom_sites_solution_hydrogens    geom
_refine_ls_hydrogen_treatment     constr
_refine_ls_extinction_method      none
_refine_ls_extinction_coef        .
_refine_ls_number_reflns          16238
_refine_ls_number_parameters      877
_refine_ls_number_restraints      0
_refine_ls_R_factor_all           0.0880
_refine_ls_R_factor_gt            0.0666
_refine_ls_wR_factor_ref          0.2002
_refine_ls_wR_factor_gt           0.1867
_refine_ls_goodness_of_fit_ref    1.436
_refine_ls_restrained_S_all       1.436
_refine_ls_shift/su_max           0.003
_refine_ls_shift/su_mean          0.000
 
loop_
 _atom_site_label
 _atom_site_type_symbol
 _atom_site_fract_x
 _atom_site_fract_y
 _atom_site_fract_z
 _atom_site_U_iso_or_equiv
 _atom_site_adp_type
 _atom_site_occupancy
 _atom_site_site_symmetry_order  
 _atom_site_calc_flag
 _atom_site_refinement_flags_posn
 _atom_site_refinement_flags_adp
 _atom_site_refinement_flags_occupancy
 _atom_site_disorder_assembly
 _atom_site_disorder_group
Ru1 Ru 0.64765(2) 0.69855(2) 0.65196(2) 0.01749(11) Uani 1 1 d . . . . .
P1 P 0.49384(7) 0.68440(5) 0.62508(3) 0.0200(2) Uani 1 1 d . . . . .
P4 P 0.67141(7) 0.69031(5) 0.58010(3) 0.0179(2) Uani 1 1 d . . . . .
P3 P 0.74188(7) 0.60268(5) 0.66163(3) 0.0196(2) Uani 1 1 d . . . . .
P2 P 0.71650(7) 0.80626(5) 0.64826(3) 0.0215(2) Uani 1 1 d . . . . .
N3 N 0.7934(2) 0.58807(16) 0.61249(10) 0.0217(7) Uani 1 1 d . . . . .
N1 N 0.4846(2) 0.66433(17) 0.56772(10) 0.0221(7) Uani 1 1 d . . . . .
F9 F 0.1969(2) 0.4374(2) 0.69488(12) 0.0726(11) Uani 1 1 d . . . . .
N2 N 0.7344(2) 0.82342(17) 0.59278(10) 0.0236(7) Uani 1 1 d . . . . .
N4 N 0.6298(2) 0.70622(16) 0.71939(11) 0.0213(7) Uani 1 1 d . . . . .
F6 F 0.5017(3) 0.3268(2) 0.73309(13) 0.0786(12) Uani 1 1 d . . . . .
F8 F 0.2274(3) 0.39624(19) 0.63170(13) 0.0769(11) Uani 1 1 d . . . . .
C42 C 0.4239(3) 0.6098(2) 0.64276(12) 0.0241(8) Uani 1 1 d . . . . .
F12 F 0.2638(3) 0.99379(18) 0.60706(13) 0.0842(13) Uani 1 1 d . . . . .
F7 F 0.3208(3) 0.3760(2) 0.69320(16) 0.0933(15) Uani 1 1 d . . . . .
F5 F 0.5021(3) 0.29803(18) 0.66382(13) 0.0825(13) Uani 1 1 d . . . . .
C63 C 0.8338(3) 0.8211(2) 0.67912(13) 0.0249(8) Uani 1 1 d . . . . .
C49 C 0.4115(3) 0.7580(2) 0.62582(13) 0.0241(8) Uani 1 1 d . . . . .
C18 C 0.4107(3) 0.6331(2) 0.54001(12) 0.0231(8) Uani 1 1 d . . . . .
C10 C 0.5674(3) 0.65481(19) 0.54641(12) 0.0220(8) Uani 1 1 d . . . . .
C35 C 0.6921(3) 0.51551(19) 0.67254(12) 0.0232(8) Uani 1 1 d . . . . .
C13 C 0.4468(3) 0.6047(2) 0.50229(12) 0.0259(9) Uani 1 1 d . . . . .
C69 C 0.9140(3) 0.8325(2) 0.65834(14) 0.0301(9) Uani 1 1 d . . . . .
H69 H 0.9089 0.8365 0.6271 0.036 Uiso 1 1 calc R U . . .
F4 F 0.6188(3) 0.27156(18) 0.71413(17) 0.0989(15) Uani 1 1 d . . . . .
C28 C 0.8473(3) 0.60181(19) 0.70358(12) 0.0217(8) Uani 1 1 d . . . . .
C27 C 0.7523(3) 0.8872(2) 0.57219(14) 0.0280(9) Uani 1 1 d . . . . .
C47 C 0.4514(3) 0.5424(2) 0.63073(13) 0.0284(9) Uani 1 1 d . . . . .
H47 H 0.5047 0.5372 0.6160 0.034 Uiso 1 1 calc R U . . .
C2 C 0.8378(3) 0.6258(2) 0.54558(13) 0.0282(9) Uani 1 1 d . . . . .
C9 C 0.8759(3) 0.5518(2) 0.60597(13) 0.0271(9) Uani 1 1 d . . . . .
C40 C 0.7037(4) 0.4554(2) 0.64674(14) 0.0354(10) Uani 1 1 d . . . . .
H40 H 0.7412 0.4573 0.6234 0.042 Uiso 1 1 calc R U . . .
C1 C 0.7721(3) 0.6334(2) 0.57465(12) 0.0220(8) Uani 1 1 d . . . . .
C46 C 0.4012(3) 0.4837(2) 0.64015(14) 0.0332(10) Uani 1 1 d . . . . .
H46 H 0.4201 0.4393 0.6313 0.040 Uiso 1 1 calc R U . . .
C11 C 0.5459(3) 0.6184(2) 0.50675(12) 0.0242(8) Uani 1 1 d . . . . .
C4 C 0.9029(3) 0.5739(2) 0.56435(13) 0.0291(9) Uani 1 1 d . . . . .
C26 C 0.7884(3) 0.9505(2) 0.59129(16) 0.0367(10) Uani 1 1 d . . . . .
H26 H 0.8041 0.9554 0.6223 0.044 Uiso 1 1 calc R U . . .
C8 C 0.9266(3) 0.5015(2) 0.63239(15) 0.0361(10) Uani 1 1 d . . . . .
H8 H 0.9071 0.4862 0.6594 0.043 Uiso 1 1 calc R U . . .
C54 C 0.3702(3) 0.7930(2) 0.58687(14) 0.0335(10) Uani 1 1 d . . . . .
H54 H 0.3787 0.7753 0.5586 0.040 Uiso 1 1 calc R U . . .
F16 F 1.1540(3) 0.8930(2) 0.7463(2) 0.127(2) Uani 1 1 d . . . . .
C50 C 0.3970(3) 0.7852(2) 0.66765(14) 0.0343(10) Uani 1 1 d . . . . .
H50 H 0.4249 0.7631 0.6938 0.041 Uiso 1 1 calc R U . . .
F11 F 0.2612(4) 0.9757(2) 0.67497(13) 0.1116(19) Uani 1 1 d . . . . .
C17 C 0.3154(3) 0.6270(2) 0.54604(13) 0.0312(9) Uani 1 1 d . . . . .
H17 H 0.2917 0.6465 0.5710 0.037 Uiso 1 1 calc R U . . .
N5 N 0.6255(3) 0.7097(2) 0.75462(13) 0.0463(11) Uani 1 1 d . . . . .
C33 C 0.9230(3) 0.6444(2) 0.69583(14) 0.0297(9) Uani 1 1 d . . . . .
H33 H 0.9175 0.6741 0.6708 0.036 Uiso 1 1 calc R U . . .
C36 C 0.6360(3) 0.5110(2) 0.70690(15) 0.0353(10) Uani 1 1 d . . . . .
H36 H 0.6267 0.5513 0.7237 0.042 Uiso 1 1 calc R U . . .
C20 C 0.6910(3) 0.8094(2) 0.51736(14) 0.0303(9) Uani 1 1 d . . . . .
C32 C 1.0066(3) 0.6435(2) 0.72471(15) 0.0342(10) Uani 1 1 d . . . . .
H32 H 1.0571 0.6715 0.7187 0.041 Uiso 1 1 calc R U . . .
C19 C 0.6978(3) 0.7760(2) 0.55813(12) 0.0236(8) Uani 1 1 d . . . . .
C64 C 0.8437(3) 0.8136(2) 0.72643(14) 0.0321(10) Uani 1 1 d . . . . .
H64 H 0.7912 0.8039 0.7409 0.039 Uiso 1 1 calc R U . . .
F10 F 0.1562(3) 0.9348(2) 0.6306(3) 0.146(3) Uani 1 1 d . . . . .
F13 F 0.4282(5) 1.0689(2) 0.6982(2) 0.146(3) Uani 1 1 d . . . . .
C43 C 0.3462(3) 0.6156(2) 0.66644(14) 0.0352(10) Uani 1 1 d . . . . .
H43 H 0.3274 0.6597 0.6759 0.042 Uiso 1 1 calc R U . . .
C52 C 0.3019(3) 0.8787(2) 0.63235(15) 0.0333(10) Uani 1 1 d . . . . .
C51 C 0.3412(3) 0.8450(2) 0.67102(15) 0.0352(10) Uani 1 1 d . . . . .
H51 H 0.3307 0.8620 0.6992 0.042 Uiso 1 1 calc R U . . .
C62 C 0.5734(3) 0.9040(2) 0.63028(16) 0.0380(11) Uani 1 1 d . . . . .
H62 H 0.5533 0.8730 0.6069 0.046 Uiso 1 1 calc R U . . .
C53 C 0.3171(4) 0.8531(2) 0.59021(15) 0.0382(11) Uani 1 1 d . . . . .
H53 H 0.2914 0.8766 0.5642 0.046 Uiso 1 1 calc R U . . .
C5 C 0.9856(3) 0.5460(3) 0.55014(15) 0.0400(11) Uani 1 1 d . . . . .
H5 H 1.0060 0.5609 0.5233 0.048 Uiso 1 1 calc R U . . .
C3 C 0.8460(3) 0.6636(3) 0.50239(14) 0.0406(11) Uani 1 1 d . . . . .
H3A H 0.8154 0.7088 0.5027 0.061 Uiso 1 1 calc R U . . .
H3B H 0.8164 0.6360 0.4776 0.061 Uiso 1 1 calc R U . . .
H3C H 0.9114 0.6703 0.4990 0.061 Uiso 1 1 calc R U . . .
C22 C 0.7276(3) 0.8797(2) 0.52575(14) 0.0311(9) Uani 1 1 d . . . . .
C56 C 0.6539(3) 0.8881(2) 0.65996(14) 0.0274(9) Uani 1 1 d . . . . .
C38 C 0.6049(4) 0.3896(2) 0.69114(16) 0.0420(12) Uani 1 1 d . . . . .
C68 C 1.0013(3) 0.8380(2) 0.68337(15) 0.0361(10) Uani 1 1 d . . . . .
H68 H 1.0547 0.8450 0.6689 0.043 Uiso 1 1 calc R U . . .
C39 C 0.6596(4) 0.3930(2) 0.65595(15) 0.0420(12) Uani 1 1 d . . . . .
H39 H 0.6665 0.3531 0.6385 0.050 Uiso 1 1 calc R U . . .
C6 C 1.0353(4) 0.4964(3) 0.57674(17) 0.0515(14) Uani 1 1 d . . . . .
H6 H 1.0894 0.4769 0.5673 0.062 Uiso 1 1 calc R U . . .
C21 C 0.6534(4) 0.7821(3) 0.47147(14) 0.0440(12) Uani 1 1 d . . . . .
H21A H 0.7051 0.7709 0.4549 0.066 Uiso 1 1 calc R U . . .
H21B H 0.6145 0.8175 0.4555 0.066 Uiso 1 1 calc R U . . .
H21C H 0.6167 0.7402 0.4746 0.066 Uiso 1 1 calc R U . . .
C61 C 0.5230(3) 0.9657(2) 0.6354(2) 0.0450(12) Uani 1 1 d . . . . .
H61 H 0.4703 0.9767 0.6152 0.054 Uiso 1 1 calc R U . . .
C30 C 0.9380(4) 0.5601(3) 0.77174(16) 0.0442(12) Uani 1 1 d . . . . .
H30 H 0.9422 0.5324 0.7976 0.053 Uiso 1 1 calc R U . . .
C14 C 0.3862(3) 0.5687(2) 0.46946(14) 0.0362(10) Uani 1 1 d . . . . .
H14 H 0.4088 0.5497 0.4441 0.043 Uiso 1 1 calc R U . . .
C29 C 0.8560(3) 0.5608(2) 0.74266(14) 0.0356(10) Uani 1 1 d . . . . .
H29 H 0.8053 0.5334 0.7491 0.043 Uiso 1 1 calc R U . . .
C12 C 0.6090(3) 0.5953(3) 0.47331(14) 0.0389(11) Uani 1 1 d . . . . .
H12A H 0.5977 0.6242 0.4467 0.058 Uiso 1 1 calc R U . . .
H12B H 0.5965 0.5468 0.4654 0.058 Uiso 1 1 calc R U . . .
H12C H 0.6736 0.6003 0.4862 0.058 Uiso 1 1 calc R U . . .
C45 C 0.3231(3) 0.4901(3) 0.66264(15) 0.0383(11) Uani 1 1 d . . . . .
C7 C 1.0075(4) 0.4746(3) 0.61719(17) 0.0493(13) Uani 1 1 d . . . . .
H7 H 1.0435 0.4413 0.6345 0.059 Uiso 1 1 calc R U . . .
C57 C 0.6815(4) 0.9334(2) 0.69508(16) 0.0399(11) Uani 1 1 d . . . . .
H57 H 0.7348 0.9232 0.7152 0.048 Uiso 1 1 calc R U . . .
C37 C 0.5932(3) 0.4484(2) 0.71723(16) 0.0399(11) Uani 1 1 d . . . . .
H37 H 0.5574 0.4460 0.7412 0.048 Uiso 1 1 calc R U . . .
C66 C 1.0100(3) 0.8331(2) 0.73020(15) 0.0328(10) Uani 1 1 d . . . . .
F18 F 1.1593(3) 0.7865(2) 0.7513(2) 0.150(3) Uani 1 1 d . . . . .
C55 C 0.2452(4) 0.9451(3) 0.63565(19) 0.0457(12) Uani 1 1 d . . . . .
C44 C 0.2966(3) 0.5549(3) 0.67591(17) 0.0443(12) Uani 1 1 d . . . . .
H44 H 0.2445 0.5589 0.6916 0.053 Uiso 1 1 calc R U . . .
C58 C 0.6291(4) 0.9951(3) 0.7006(2) 0.0539(14) Uani 1 1 d . . . . .
H58 H 0.6471 1.0253 0.7246 0.065 Uiso 1 1 calc R U . . .
C23 C 0.7397(4) 0.9361(3) 0.49698(17) 0.0475(13) Uani 1 1 d . . . . .
H23 H 0.7232 0.9316 0.4660 0.057 Uiso 1 1 calc R U . . .
C15 C 0.2928(4) 0.5618(3) 0.47540(16) 0.0446(12) Uani 1 1 d . . . . .
H15 H 0.2521 0.5377 0.4540 0.054 Uiso 1 1 calc R U . . .
C31 C 1.0146(3) 0.6004(2) 0.76274(15) 0.0375(11) Uani 1 1 d . . . . .
C65 C 0.9309(3) 0.8207(2) 0.75118(15) 0.0359(10) Uani 1 1 d . . . . .
H65 H 0.9366 0.8170 0.7824 0.043 Uiso 1 1 calc R U . . .
C25 C 0.7996(4) 1.0054(3) 0.56203(19) 0.0480(13) Uani 1 1 d . . . . .
H25 H 0.8234 1.0483 0.5736 0.058 Uiso 1 1 calc R U . . .
C48 C 0.2681(4) 0.4255(3) 0.6708(2) 0.0547(15) Uani 1 1 d . . . . .
C67 C 1.1050(4) 0.8391(3) 0.75669(18) 0.0491(13) Uani 1 1 d . . . . .
C59 C 0.5520(4) 1.0105(2) 0.6708(2) 0.0452(13) Uani 1 1 d . . . . .
C16 C 0.2581(3) 0.5906(3) 0.51302(14) 0.0382(11) Uani 1 1 d . . . . .
H16 H 0.1945 0.5852 0.5161 0.046 Uiso 1 1 calc R U . . .
F17 F 1.1042(3) 0.8445(5) 0.79939(15) 0.163(3) Uani 1 1 d . . . . .
C41 C 0.5591(5) 0.3206(3) 0.6999(2) 0.0604(17) Uani 1 1 d . . . . .
F14 F 0.4516(6) 1.1013(3) 0.6391(2) 0.168(3) Uani 1 1 d . . . . .
C24 C 0.7761(4) 0.9981(3) 0.51497(19) 0.0538(14) Uani 1 1 d . . . . .
H24 H 0.7854 1.0359 0.4961 0.065 Uiso 1 1 calc R U . . .
F1 F 1.1776(3) 0.6083(5) 0.77375(19) 0.173(3) Uani 1 1 d . . . . .
C34 C 1.1036(4) 0.5964(4) 0.7932(2) 0.0595(16) Uani 1 1 d . . . . .
C60 C 0.4980(5) 1.0772(3) 0.6768(3) 0.073(2) Uani 1 1 d . . . . .
F3 F 1.1165(5) 0.6473(5) 0.8202(3) 0.209(4) Uani 1 1 d . . . . .
F2 F 1.1166(5) 0.5445(4) 0.8154(3) 0.253(6) Uani 1 1 d . . . . .
F15 F 0.5459(4) 1.1265(3) 0.6915(4) 0.278(6) Uani 1 1 d . . . . .
 
loop_
 _atom_site_aniso_label
 _atom_site_aniso_U_11
 _atom_site_aniso_U_22
 _atom_site_aniso_U_33
 _atom_site_aniso_U_23
 _atom_site_aniso_U_13
 _atom_site_aniso_U_12
Ru1 0.02144(18) 0.01601(18) 0.01476(16) -0.00060(10) 0.00119(11) -0.00060(11)
P1 0.0201(5) 0.0236(5) 0.0164(4) -0.0022(4) 0.0022(4) 0.0016(4)
P4 0.0207(5) 0.0176(5) 0.0152(4) -0.0003(3) 0.0014(4) 0.0000(4)
P3 0.0249(5) 0.0160(5) 0.0180(4) 0.0013(4) 0.0031(4) -0.0011(4)
P2 0.0258(5) 0.0173(5) 0.0213(5) -0.0014(4) 0.0021(4) -0.0009(4)
N3 0.0224(16) 0.0207(16) 0.0220(15) 0.0014(13) 0.0029(13) 0.0045(13)
N1 0.0233(17) 0.0245(17) 0.0173(14) -0.0059(13) -0.0031(13) 0.0010(13)
F9 0.051(2) 0.090(3) 0.076(2) 0.039(2) 0.0075(18) -0.0250(18)
N2 0.0268(18) 0.0184(16) 0.0247(16) 0.0042(13) -0.0010(14) -0.0056(14)
N4 0.0244(17) 0.0180(16) 0.0204(17) 0.0006(12) -0.0023(13) -0.0009(13)
F6 0.089(3) 0.071(2) 0.072(2) 0.032(2) -0.006(2) -0.042(2)
F8 0.076(3) 0.058(2) 0.094(3) 0.0001(19) -0.001(2) -0.0350(19)
C42 0.0195(19) 0.032(2) 0.0199(17) 0.0034(16) -0.0018(15) -0.0051(16)
F12 0.126(4) 0.049(2) 0.087(2) 0.0333(19) 0.052(2) 0.046(2)
F7 0.065(2) 0.069(2) 0.142(4) 0.067(3) -0.003(2) -0.0139(19)
F5 0.114(3) 0.054(2) 0.072(2) 0.0068(17) -0.018(2) -0.050(2)
C63 0.027(2) 0.0150(18) 0.032(2) -0.0057(16) -0.0001(17) -0.0018(16)
C49 0.0164(18) 0.028(2) 0.0275(19) -0.0011(16) 0.0015(15) 0.0022(16)
C18 0.028(2) 0.0198(19) 0.0204(17) -0.0012(15) -0.0027(16) -0.0015(16)
C10 0.025(2) 0.0190(19) 0.0220(17) -0.0007(15) 0.0034(15) 0.0041(15)
C35 0.031(2) 0.0167(19) 0.0204(17) 0.0048(14) -0.0027(16) -0.0021(16)
C13 0.031(2) 0.024(2) 0.0216(18) -0.0023(15) -0.0007(16) -0.0015(17)
C69 0.030(2) 0.031(2) 0.030(2) 0.0023(18) 0.0016(18) -0.0026(18)
F4 0.099(3) 0.0336(18) 0.156(4) 0.036(2) -0.019(3) -0.0143(19)
C28 0.0228(19) 0.0178(19) 0.0237(17) -0.0056(15) -0.0004(15) 0.0026(15)
C27 0.029(2) 0.021(2) 0.034(2) 0.0090(17) 0.0025(17) -0.0041(17)
C47 0.029(2) 0.031(2) 0.0251(19) -0.0030(17) 0.0042(17) -0.0031(18)
C2 0.029(2) 0.033(2) 0.0227(18) -0.0048(17) 0.0035(17) -0.0013(18)
C9 0.029(2) 0.026(2) 0.0254(19) -0.0069(16) 0.0009(17) 0.0014(17)
C40 0.049(3) 0.026(2) 0.029(2) -0.0029(17) -0.005(2) -0.002(2)
C1 0.022(2) 0.0216(19) 0.0217(17) -0.0028(15) -0.0001(15) 0.0015(15)
C46 0.037(2) 0.030(2) 0.031(2) 0.0019(18) -0.0031(19) -0.0043(19)
C11 0.028(2) 0.023(2) 0.0218(17) -0.0047(15) 0.0019(16) 0.0008(16)
C4 0.027(2) 0.034(2) 0.0264(19) -0.0099(17) 0.0058(17) 0.0013(18)
C26 0.046(3) 0.022(2) 0.042(2) 0.0081(19) 0.004(2) -0.009(2)
C8 0.042(3) 0.030(2) 0.035(2) -0.0026(19) 0.001(2) 0.015(2)
C54 0.043(3) 0.035(2) 0.0222(19) -0.0035(17) 0.0016(18) 0.002(2)
F16 0.073(3) 0.088(3) 0.198(5) 0.062(3) -0.075(3) -0.050(2)
C50 0.045(3) 0.033(2) 0.025(2) -0.0053(18) 0.0038(19) 0.006(2)
F11 0.206(6) 0.062(2) 0.068(2) -0.007(2) 0.021(3) 0.073(3)
C17 0.027(2) 0.040(3) 0.0257(19) -0.0039(18) 0.0009(17) 0.0004(19)
N5 0.070(3) 0.041(2) 0.030(2) -0.0003(17) 0.015(2) 0.000(2)
C33 0.036(2) 0.020(2) 0.032(2) 0.0054(17) -0.0016(18) 0.0018(17)
C36 0.042(3) 0.028(2) 0.037(2) 0.0027(18) 0.006(2) -0.0043(19)
C20 0.032(2) 0.032(2) 0.027(2) 0.0096(17) 0.0018(18) -0.0009(18)
C32 0.026(2) 0.027(2) 0.047(3) -0.0035(19) -0.004(2) -0.0008(18)
C19 0.023(2) 0.023(2) 0.0231(18) 0.0011(16) -0.0013(16) 0.0021(16)
C64 0.038(3) 0.030(2) 0.028(2) -0.0017(17) 0.0040(19) -0.0034(19)
F10 0.049(2) 0.042(2) 0.352(9) -0.015(3) 0.045(4) 0.0173(18)
F13 0.204(6) 0.076(3) 0.187(5) 0.030(3) 0.141(5) 0.071(4)
C43 0.033(2) 0.038(3) 0.036(2) 0.0121(19) 0.0086(19) 0.007(2)
C52 0.032(2) 0.027(2) 0.042(2) 0.0002(19) 0.009(2) 0.0040(18)
C51 0.036(3) 0.036(3) 0.035(2) -0.0062(19) 0.012(2) 0.006(2)
C62 0.039(3) 0.027(2) 0.047(3) 0.000(2) 0.004(2) -0.006(2)
C53 0.051(3) 0.031(2) 0.033(2) 0.0080(19) 0.001(2) 0.011(2)
C5 0.037(3) 0.051(3) 0.032(2) -0.007(2) 0.008(2) 0.011(2)
C3 0.037(3) 0.058(3) 0.030(2) 0.004(2) 0.014(2) 0.009(2)
C22 0.030(2) 0.028(2) 0.035(2) 0.0105(18) 0.0040(18) 0.0005(18)
C56 0.035(2) 0.0124(18) 0.036(2) 0.0056(16) 0.0068(18) 0.0045(16)
C38 0.049(3) 0.027(2) 0.044(3) 0.011(2) -0.017(2) -0.013(2)
C68 0.027(2) 0.039(3) 0.041(2) 0.001(2) 0.0008(19) -0.0023(19)
C39 0.058(3) 0.022(2) 0.041(3) -0.0035(19) -0.012(2) -0.006(2)
C6 0.043(3) 0.063(3) 0.049(3) -0.015(3) 0.007(2) 0.024(3)
C21 0.060(3) 0.048(3) 0.022(2) 0.010(2) -0.003(2) -0.005(2)
C61 0.032(3) 0.023(2) 0.080(4) 0.007(2) 0.009(2) 0.0034(19)
C30 0.051(3) 0.044(3) 0.034(2) 0.014(2) -0.008(2) 0.000(2)
C14 0.038(3) 0.045(3) 0.024(2) -0.0120(19) -0.0033(18) -0.005(2)
C29 0.036(2) 0.040(3) 0.028(2) 0.0083(19) -0.0031(19) -0.004(2)
C12 0.038(3) 0.053(3) 0.026(2) -0.017(2) 0.0042(19) 0.002(2)
C45 0.035(3) 0.045(3) 0.032(2) 0.016(2) -0.0079(19) -0.008(2)
C7 0.051(3) 0.050(3) 0.044(3) -0.007(2) -0.003(2) 0.021(3)
C57 0.043(3) 0.033(2) 0.043(2) -0.011(2) 0.002(2) 0.002(2)
C37 0.041(3) 0.036(3) 0.042(2) 0.013(2) 0.001(2) -0.012(2)
C66 0.030(2) 0.022(2) 0.043(2) -0.0038(18) -0.0082(19) -0.0005(18)
F18 0.070(3) 0.078(3) 0.273(8) -0.043(4) -0.096(4) 0.025(2)
C55 0.048(3) 0.029(3) 0.062(3) -0.002(2) 0.012(3) 0.008(2)
C44 0.032(3) 0.056(3) 0.047(3) 0.020(2) 0.013(2) 0.006(2)
C58 0.056(4) 0.033(3) 0.075(4) -0.022(3) 0.014(3) -0.002(2)
C23 0.052(3) 0.045(3) 0.044(3) 0.027(2) 0.002(2) -0.006(2)
C15 0.039(3) 0.055(3) 0.037(2) -0.012(2) -0.007(2) -0.016(2)
C31 0.035(3) 0.034(2) 0.039(2) -0.004(2) -0.011(2) 0.004(2)
C65 0.036(3) 0.036(2) 0.033(2) -0.0073(19) -0.008(2) 0.001(2)
C25 0.050(3) 0.027(2) 0.065(3) 0.015(2) 0.000(3) -0.011(2)
C48 0.041(3) 0.048(3) 0.073(4) 0.025(3) 0.000(3) -0.009(2)
C67 0.046(3) 0.039(3) 0.056(3) -0.005(2) -0.020(3) -0.005(2)
C59 0.040(3) 0.020(2) 0.080(4) -0.002(2) 0.025(3) 0.001(2)
C16 0.030(2) 0.050(3) 0.033(2) -0.001(2) -0.0048(19) -0.010(2)
F17 0.055(3) 0.364(10) 0.063(3) -0.030(4) -0.021(2) -0.038(4)
C41 0.070(4) 0.038(3) 0.065(4) 0.019(3) -0.025(3) -0.025(3)
F14 0.243(8) 0.110(4) 0.166(5) 0.048(4) 0.085(6) 0.133(5)
C24 0.062(4) 0.037(3) 0.062(3) 0.029(3) 0.003(3) -0.007(3)
F1 0.042(3) 0.358(11) 0.113(4) 0.043(5) -0.021(3) 0.023(4)
C34 0.038(3) 0.075(4) 0.059(3) 0.010(3) -0.021(3) 0.002(3)
C60 0.078(5) 0.019(3) 0.128(6) 0.008(3) 0.039(5) 0.009(3)
F3 0.114(5) 0.306(11) 0.177(6) -0.135(7) -0.099(5) 0.056(6)
F2 0.128(5) 0.216(7) 0.361(11) 0.214(8) -0.181(7) -0.083(5)
F15 0.100(4) 0.048(3) 0.654(18) -0.142(6) -0.080(7) 0.036(3)
 
_geom_special_details
;
 All esds (except the esd in the dihedral angle between two l.s. planes)
 are estimated using the full covariance matrix.  The cell esds are taken
 into account individually in the estimation of esds in distances, angles
 and torsion angles; correlations between esds in cell parameters are only
 used when they are defined by crystal symmetry.  An approximate (isotropic)
 treatment of cell esds is used for estimating esds involving l.s. planes.
;
 
loop_
 _geom_bond_atom_site_label_1
 _geom_bond_atom_site_label_2
 _geom_bond_distance
 _geom_bond_site_symmetry_2
 _geom_bond_publ_flag
Ru1 N4 2.066(3) . ?
Ru1 P4 2.2194(9) . ?
Ru1 P3 2.2555(10) . ?
Ru1 P1 2.2613(10) . ?
Ru1 P2 2.2702(10) . ?
P1 N1 1.744(3) . ?
P1 C49 1.825(4) . ?
P1 C42 1.843(4) . ?
P4 C19 1.805(4) . ?
P4 C10 1.818(4) . ?
P4 C1 1.819(4) . ?
P3 N3 1.742(3) . ?
P3 C28 1.838(4) . ?
P3 C35 1.840(4) . ?
P2 N2 1.738(3) . ?
P2 C63 1.832(4) . ?
P2 C56 1.842(4) . ?
N3 C9 1.398(5) . ?
N3 C1 1.421(5) . ?
N1 C18 1.391(5) . ?
N1 C10 1.421(5) . ?
F9 C48 1.334(7) . ?
N2 C27 1.391(5) . ?
N2 C19 1.420(5) . ?
N4 N5 1.064(5) . ?
F6 C41 1.367(8) . ?
F8 C48 1.359(7) . ?
C42 C43 1.392(6) . ?
C42 C47 1.394(6) . ?
F12 C55 1.304(6) . ?
F7 C48 1.330(6) . ?
F5 C41 1.338(6) . ?
C63 C69 1.386(6) . ?
C63 C64 1.410(6) . ?
C49 C50 1.390(6) . ?
C49 C54 1.404(6) . ?
C18 C17 1.400(6) . ?
C18 C13 1.402(5) . ?
C10 C11 1.373(5) . ?
C35 C36 1.380(6) . ?
C35 C40 1.395(6) . ?
C13 C14 1.403(5) . ?
C13 C11 1.429(6) . ?
C69 C68 1.377(6) . ?
C69 H69 0.9300 . ?
F4 C41 1.296(7) . ?
C28 C33 1.392(6) . ?
C28 C29 1.394(6) . ?
C27 C22 1.396(6) . ?
C27 C26 1.397(6) . ?
C47 C46 1.369(6) . ?
C47 H47 0.9300 . ?
C2 C1 1.362(6) . ?
C2 C4 1.420(6) . ?
C2 C3 1.492(6) . ?
C9 C8 1.383(6) . ?
C9 C4 1.410(6) . ?
C40 C39 1.382(6) . ?
C40 H40 0.9300 . ?
C46 C45 1.377(7) . ?
C46 H46 0.9300 . ?
C11 C12 1.490(6) . ?
C4 C5 1.405(6) . ?
C26 C25 1.380(6) . ?
C26 H26 0.9300 . ?
C8 C7 1.389(7) . ?
C8 H8 0.9300 . ?
C54 C53 1.376(6) . ?
C54 H54 0.9300 . ?
F16 C67 1.296(7) . ?
C50 C51 1.394(6) . ?
C50 H50 0.9300 . ?
F11 C55 1.304(6) . ?
C17 C16 1.386(6) . ?
C17 H17 0.9300 . ?
C33 C32 1.385(6) . ?
C33 H33 0.9300 . ?
C36 C37 1.384(6) . ?
C36 H36 0.9300 . ?
C20 C19 1.364(5) . ?
C20 C22 1.439(6) . ?
C20 C21 1.501(6) . ?
C32 C31 1.391(6) . ?
C32 H32 0.9300 . ?
C64 C65 1.375(6) . ?
C64 H64 0.9300 . ?
F10 C55 1.277(7) . ?
F13 C60 1.258(8) . ?
C43 C44 1.397(7) . ?
C43 H43 0.9300 . ?
C52 C51 1.377(6) . ?
C52 C53 1.391(6) . ?
C52 C55 1.505(6) . ?
C51 H51 0.9300 . ?
C62 C61 1.388(7) . ?
C62 C56 1.396(6) . ?
C62 H62 0.9300 . ?
C53 H53 0.9300 . ?
C5 C6 1.371(7) . ?
C5 H5 0.9300 . ?
C3 H3A 0.9600 . ?
C3 H3B 0.9600 . ?
C3 H3C 0.9600 . ?
C22 C23 1.394(6) . ?
C56 C57 1.374(6) . ?
C38 C37 1.380(7) . ?
C38 C39 1.385(7) . ?
C38 C41 1.497(7) . ?
C68 C66 1.392(6) . ?
C68 H68 0.9300 . ?
C39 H39 0.9300 . ?
C6 C7 1.380(8) . ?
C6 H6 0.9300 . ?
C21 H21A 0.9600 . ?
C21 H21B 0.9600 . ?
C21 H21C 0.9600 . ?
C61 C59 1.378(8) . ?
C61 H61 0.9300 . ?
C30 C29 1.370(6) . ?
C30 C31 1.386(7) . ?
C30 H30 0.9300 . ?
C14 C15 1.373(7) . ?
C14 H14 0.9300 . ?
C29 H29 0.9300 . ?
C12 H12A 0.9600 . ?
C12 H12B 0.9600 . ?
C12 H12C 0.9600 . ?
C45 C44 1.356(7) . ?
C45 C48 1.488(7) . ?
C7 H7 0.9300 . ?
C57 C58 1.406(7) . ?
C57 H57 0.9300 . ?
C37 H37 0.9300 . ?
C66 C65 1.377(7) . ?
C66 C67 1.490(6) . ?
F18 C67 1.284(7) . ?
C44 H44 0.9300 . ?
C58 C59 1.361(8) . ?
C58 H58 0.9300 . ?
C23 C24 1.366(8) . ?
C23 H23 0.9300 . ?
C15 C16 1.393(7) . ?
C15 H15 0.9300 . ?
C31 C34 1.472(6) . ?
C65 H65 0.9300 . ?
C25 C24 1.412(8) . ?
C25 H25 0.9300 . ?
C67 F17 1.281(7) . ?
C59 C60 1.501(7) . ?
C16 H16 0.9300 . ?
F14 C60 1.316(10) . ?
C24 H24 0.9300 . ?
F1 C34 1.287(8) . ?
C34 F2 1.187(8) . ?
C34 F3 1.256(9) . ?
C60 F15 1.207(8) . ?
 
loop_
 _geom_angle_atom_site_label_1
 _geom_angle_atom_site_label_2
 _geom_angle_atom_site_label_3
 _geom_angle
 _geom_angle_site_symmetry_1
 _geom_angle_site_symmetry_3
 _geom_angle_publ_flag
N4 Ru1 P4 178.31(9) . . ?
N4 Ru1 P3 94.26(9) . . ?
P4 Ru1 P3 84.73(3) . . ?
N4 Ru1 P1 97.13(9) . . ?
P4 Ru1 P1 84.54(4) . . ?
P3 Ru1 P1 119.28(4) . . ?
N4 Ru1 P2 95.18(9) . . ?
P4 Ru1 P2 84.13(4) . . ?
P3 Ru1 P2 118.16(4) . . ?
P1 Ru1 P2 119.79(4) . . ?
N1 P1 C49 101.91(16) . . ?
N1 P1 C42 97.84(17) . . ?
C49 P1 C42 101.98(19) . . ?
N1 P1 Ru1 109.17(12) . . ?
C49 P1 Ru1 120.35(13) . . ?
C42 P1 Ru1 121.75(13) . . ?
C19 P4 C10 108.84(17) . . ?
C19 P4 C1 107.25(18) . . ?
C10 P4 C1 109.48(17) . . ?
C19 P4 Ru1 110.60(13) . . ?
C10 P4 Ru1 110.49(13) . . ?
C1 P4 Ru1 110.11(12) . . ?
N3 P3 C28 100.26(16) . . ?
N3 P3 C35 102.67(16) . . ?
C28 P3 C35 99.99(17) . . ?
N3 P3 Ru1 109.05(11) . . ?
C28 P3 Ru1 121.39(12) . . ?
C35 P3 Ru1 120.34(14) . . ?
N2 P2 C63 102.65(18) . . ?
N2 P2 C56 98.94(17) . . ?
C63 P2 C56 102.21(18) . . ?
N2 P2 Ru1 109.20(11) . . ?
C63 P2 Ru1 119.20(13) . . ?
C56 P2 Ru1 121.40(14) . . ?
C9 N3 C1 106.7(3) . . ?
C9 N3 P3 130.2(3) . . ?
C1 N3 P3 120.2(2) . . ?
C18 N1 C10 107.0(3) . . ?
C18 N1 P1 129.6(3) . . ?
C10 N1 P1 120.0(2) . . ?
C27 N2 C19 107.2(3) . . ?
C27 N2 P2 129.8(3) . . ?
C19 N2 P2 119.5(3) . . ?
N5 N4 Ru1 176.2(4) . . ?
C43 C42 C47 118.1(4) . . ?
C43 C42 P1 125.4(3) . . ?
C47 C42 P1 116.5(3) . . ?
C69 C63 C64 118.5(4) . . ?
C69 C63 P2 123.7(3) . . ?
C64 C63 P2 117.6(3) . . ?
C50 C49 C54 118.5(4) . . ?
C50 C49 P1 117.4(3) . . ?
C54 C49 P1 123.7(3) . . ?
N1 C18 C17 129.6(4) . . ?
N1 C18 C13 108.3(3) . . ?
C17 C18 C13 122.0(3) . . ?
C11 C10 N1 109.9(3) . . ?
C11 C10 P4 138.1(3) . . ?
N1 C10 P4 111.9(2) . . ?
C36 C35 C40 118.7(4) . . ?
C36 C35 P3 117.4(3) . . ?
C40 C35 P3 123.9(3) . . ?
C18 C13 C14 119.4(4) . . ?
C18 C13 C11 108.2(3) . . ?
C14 C13 C11 132.3(4) . . ?
C68 C69 C63 120.8(4) . . ?
C68 C69 H69 119.6 . . ?
C63 C69 H69 119.6 . . ?
C33 C28 C29 118.0(4) . . ?
C33 C28 P3 118.1(3) . . ?
C29 C28 P3 123.9(3) . . ?
N2 C27 C22 108.3(4) . . ?
N2 C27 C26 129.8(4) . . ?
C22 C27 C26 121.9(4) . . ?
C46 C47 C42 121.2(4) . . ?
C46 C47 H47 119.4 . . ?
C42 C47 H47 119.4 . . ?
C1 C2 C4 106.9(3) . . ?
C1 C2 C3 129.4(4) . . ?
C4 C2 C3 123.8(4) . . ?
C8 C9 N3 130.5(4) . . ?
C8 C9 C4 121.8(4) . . ?
N3 C9 C4 107.7(3) . . ?
C39 C40 C35 119.9(4) . . ?
C39 C40 H40 120.1 . . ?
C35 C40 H40 120.1 . . ?
C2 C1 N3 110.3(3) . . ?
C2 C1 P4 137.1(3) . . ?
N3 C1 P4 112.4(3) . . ?
C47 C46 C45 120.3(4) . . ?
C47 C46 H46 119.8 . . ?
C45 C46 H46 119.8 . . ?
C10 C11 C13 106.6(3) . . ?
C10 C11 C12 129.5(4) . . ?
C13 C11 C12 123.9(3) . . ?
C5 C4 C9 119.1(4) . . ?
C5 C4 C2 132.4(4) . . ?
C9 C4 C2 108.5(4) . . ?
C25 C26 C27 116.9(4) . . ?
C25 C26 H26 121.6 . . ?
C27 C26 H26 121.6 . . ?
C9 C8 C7 117.7(4) . . ?
C9 C8 H8 121.2 . . ?
C7 C8 H8 121.2 . . ?
C53 C54 C49 120.5(4) . . ?
C53 C54 H54 119.7 . . ?
C49 C54 H54 119.7 . . ?
C49 C50 C51 120.9(4) . . ?
C49 C50 H50 119.5 . . ?
C51 C50 H50 119.5 . . ?
C16 C17 C18 116.6(4) . . ?
C16 C17 H17 121.7 . . ?
C18 C17 H17 121.7 . . ?
C32 C33 C28 121.2(4) . . ?
C32 C33 H33 119.4 . . ?
C28 C33 H33 119.4 . . ?
C35 C36 C37 122.1(4) . . ?
C35 C36 H36 118.9 . . ?
C37 C36 H36 118.9 . . ?
C19 C20 C22 106.7(4) . . ?
C19 C20 C21 129.4(4) . . ?
C22 C20 C21 124.0(4) . . ?
C33 C32 C31 119.7(4) . . ?
C33 C32 H32 120.2 . . ?
C31 C32 H32 120.2 . . ?
C20 C19 N2 109.8(3) . . ?
C20 C19 P4 138.1(3) . . ?
N2 C19 P4 112.1(3) . . ?
C65 C64 C63 120.2(4) . . ?
C65 C64 H64 119.9 . . ?
C63 C64 H64 119.9 . . ?
C42 C43 C44 119.6(4) . . ?
C42 C43 H43 120.2 . . ?
C44 C43 H43 120.2 . . ?
C51 C52 C53 120.3(4) . . ?
C51 C52 C55 119.9(4) . . ?
C53 C52 C55 119.7(4) . . ?
C52 C51 C50 119.5(4) . . ?
C52 C51 H51 120.2 . . ?
C50 C51 H51 120.2 . . ?
C61 C62 C56 120.6(4) . . ?
C61 C62 H62 119.7 . . ?
C56 C62 H62 119.7 . . ?
C54 C53 C52 120.1(4) . . ?
C54 C53 H53 119.9 . . ?
C52 C53 H53 119.9 . . ?
C6 C5 C4 118.5(4) . . ?
C6 C5 H5 120.7 . . ?
C4 C5 H5 120.7 . . ?
C2 C3 H3A 109.5 . . ?
C2 C3 H3B 109.5 . . ?
H3A C3 H3B 109.5 . . ?
C2 C3 H3C 109.5 . . ?
H3A C3 H3C 109.5 . . ?
H3B C3 H3C 109.5 . . ?
C23 C22 C27 120.0(4) . . ?
C23 C22 C20 132.0(4) . . ?
C27 C22 C20 108.0(4) . . ?
C57 C56 C62 119.2(4) . . ?
C57 C56 P2 124.6(3) . . ?
C62 C56 P2 116.2(3) . . ?
C37 C38 C39 120.7(4) . . ?
C37 C38 C41 121.2(5) . . ?
C39 C38 C41 118.1(5) . . ?
C69 C68 C66 120.3(4) . . ?
C69 C68 H68 119.9 . . ?
C66 C68 H68 119.9 . . ?
C40 C39 C38 120.3(4) . . ?
C40 C39 H39 119.9 . . ?
C38 C39 H39 119.9 . . ?
C5 C6 C7 121.9(5) . . ?
C5 C6 H6 119.1 . . ?
C7 C6 H6 119.1 . . ?
C20 C21 H21A 109.5 . . ?
C20 C21 H21B 109.5 . . ?
H21A C21 H21B 109.5 . . ?
C20 C21 H21C 109.5 . . ?
H21A C21 H21C 109.5 . . ?
H21B C21 H21C 109.5 . . ?
C59 C61 C62 119.3(5) . . ?
C59 C61 H61 120.3 . . ?
C62 C61 H61 120.3 . . ?
C29 C30 C31 120.3(4) . . ?
C29 C30 H30 119.8 . . ?
C31 C30 H30 119.8 . . ?
C15 C14 C13 118.8(4) . . ?
C15 C14 H14 120.6 . . ?
C13 C14 H14 120.6 . . ?
C30 C29 C28 121.2(4) . . ?
C30 C29 H29 119.4 . . ?
C28 C29 H29 119.4 . . ?
C11 C12 H12A 109.5 . . ?
C11 C12 H12B 109.5 . . ?
H12A C12 H12B 109.5 . . ?
C11 C12 H12C 109.5 . . ?
H12A C12 H12C 109.5 . . ?
H12B C12 H12C 109.5 . . ?
C44 C45 C46 119.6(4) . . ?
C44 C45 C48 121.4(5) . . ?
C46 C45 C48 119.0(5) . . ?
C6 C7 C8 121.1(5) . . ?
C6 C7 H7 119.5 . . ?
C8 C7 H7 119.5 . . ?
C56 C57 C58 119.9(5) . . ?
C56 C57 H57 120.0 . . ?
C58 C57 H57 120.0 . . ?
C38 C37 C36 118.4(5) . . ?
C38 C37 H37 120.8 . . ?
C36 C37 H37 120.8 . . ?
C65 C66 C68 119.4(4) . . ?
C65 C66 C67 121.1(4) . . ?
C68 C66 C67 119.5(4) . . ?
F10 C55 F11 103.7(6) . . ?
F10 C55 F12 108.1(5) . . ?
F11 C55 F12 104.5(5) . . ?
F10 C55 C52 113.6(4) . . ?
F11 C55 C52 113.1(4) . . ?
F12 C55 C52 113.1(4) . . ?
C45 C44 C43 121.2(4) . . ?
C45 C44 H44 119.4 . . ?
C43 C44 H44 119.4 . . ?
C59 C58 C57 120.1(5) . . ?
C59 C58 H58 120.0 . . ?
C57 C58 H58 120.0 . . ?
C24 C23 C22 118.9(5) . . ?
C24 C23 H23 120.5 . . ?
C22 C23 H23 120.5 . . ?
C14 C15 C16 121.0(4) . . ?
C14 C15 H15 119.5 . . ?
C16 C15 H15 119.5 . . ?
C30 C31 C32 119.5(4) . . ?
C30 C31 C34 119.7(4) . . ?
C32 C31 C34 120.8(5) . . ?
C64 C65 C66 120.8(4) . . ?
C64 C65 H65 119.6 . . ?
C66 C65 H65 119.6 . . ?
C26 C25 C24 121.7(5) . . ?
C26 C25 H25 119.2 . . ?
C24 C25 H25 119.2 . . ?
F7 C48 F9 105.7(5) . . ?
F7 C48 F8 107.6(5) . . ?
F9 C48 F8 104.9(4) . . ?
F7 C48 C45 112.4(4) . . ?
F9 C48 C45 113.7(5) . . ?
F8 C48 C45 111.8(4) . . ?
F17 C67 F18 105.4(6) . . ?
F17 C67 F16 104.3(5) . . ?
F18 C67 F16 103.2(6) . . ?
F17 C67 C66 114.6(5) . . ?
F18 C67 C66 113.5(4) . . ?
F16 C67 C66 114.6(4) . . ?
C58 C59 C61 120.9(4) . . ?
C58 C59 C60 119.2(5) . . ?
C61 C59 C60 119.9(6) . . ?
C17 C16 C15 122.0(4) . . ?
C17 C16 H16 119.0 . . ?
C15 C16 H16 119.0 . . ?
F4 C41 F5 110.4(5) . . ?
F4 C41 F6 104.6(5) . . ?
F5 C41 F6 104.6(5) . . ?
F4 C41 C38 113.3(5) . . ?
F5 C41 C38 112.0(4) . . ?
F6 C41 C38 111.4(5) . . ?
C23 C24 C25 120.6(4) . . ?
C23 C24 H24 119.7 . . ?
C25 C24 H24 119.7 . . ?
F2 C34 F3 105.9(8) . . ?
F2 C34 F1 108.4(8) . . ?
F3 C34 F1 95.2(7) . . ?
F2 C34 C31 116.9(6) . . ?
F3 C34 C31 114.0(6) . . ?
F1 C34 C31 114.1(5) . . ?
F15 C60 F13 111.2(8) . . ?
F15 C60 F14 104.3(7) . . ?
F13 C60 F14 97.6(7) . . ?
F15 C60 C59 114.5(6) . . ?
F13 C60 C59 114.0(5) . . ?
F14 C60 C59 113.6(6) . . ?
 
_refine_diff_density_max    1.238
_refine_diff_density_min   -0.786
_refine_diff_density_rms    0.097

_shelx_res_file
;

    FF471_0m_a_sq.res created by SHELXL-2014/7


TITL FF471_0m_a.res in P2(1)/c
CELL  0.71073  14.2851  18.9090  29.8721   90.000   97.011   90.000
ZERR    4.000   0.0006   0.0008   0.0012    0.000    0.002    0.000
LATT 1
SYMM -X, 1/2+Y, 1/2-Z
SFAC C  H  N  F  P  Ru
UNIT 276  180  20  72  16  4
REM Old TITL FF471_0m in P2(1)/c
REM SHELXT solution in P2(1)/c
REM R1 0.184,  Rweak 0.015,  Alpha 0.061,  Orientation as input
REM Formula found by SHELXT:  C67 N11 O4 F12 P4 Ru
L.S. 5 0  145
BOND $H
FMAP 2
PLAN 20
SIZE 0.362 0.406 0.621
ABIN
ACTA
OMIT  0 2 2
OMIT  0 2 1
WGHT    0.100000
FVAR       0.22010
RU1   6    0.647649    0.698553    0.651959    11.00000    0.02144    0.01601 =
         0.01476   -0.00060    0.00119   -0.00060
P1    5    0.493837    0.684398    0.625079    11.00000    0.02008    0.02358 =
         0.01644   -0.00222    0.00223    0.00162
P4    5    0.671407    0.690310    0.580097    11.00000    0.02066    0.01757 =
         0.01522   -0.00027    0.00143    0.00000
P3    5    0.741875    0.602676    0.661628    11.00000    0.02492    0.01603 =
         0.01796    0.00134    0.00312   -0.00111
P2    5    0.716501    0.806259    0.648265    11.00000    0.02579    0.01732 =
         0.02126   -0.00143    0.00210   -0.00092
N3    3    0.793377    0.588069    0.612494    11.00000    0.02245    0.02072 =
         0.02198    0.00141    0.00289    0.00455
N1    3    0.484603    0.664332    0.567724    11.00000    0.02328    0.02448 =
         0.01727   -0.00595   -0.00310    0.00099
F9    4    0.196859    0.437444    0.694879    11.00000    0.05111    0.09025 =
         0.07647    0.03911    0.00751   -0.02505
N2    3    0.734418    0.823420    0.592776    11.00000    0.02682    0.01836 =
         0.02469    0.00423   -0.00101   -0.00563
N4    3    0.629779    0.706217    0.719386    11.00000    0.02437    0.01804 =
         0.02037    0.00060   -0.00231   -0.00089
F6    4    0.501683    0.326834    0.733092    11.00000    0.08861    0.07100 =
         0.07213    0.03224   -0.00599   -0.04216
F8    4    0.227370    0.396236    0.631696    11.00000    0.07587    0.05792 =
         0.09390    0.00014   -0.00131   -0.03495
C42   1    0.423872    0.609808    0.642761    11.00000    0.01955    0.03192 =
         0.01994    0.00335   -0.00181   -0.00513
F12   4    0.263831    0.993788    0.607059    11.00000    0.12621    0.04938 =
         0.08671    0.03329    0.05213    0.04625
F7    4    0.320844    0.376020    0.693201    11.00000    0.06482    0.06915 =
         0.14214    0.06747   -0.00258   -0.01387
F5    4    0.502068    0.298029    0.663816    11.00000    0.11440    0.05425 =
         0.07184    0.00683   -0.01756   -0.05043
C63   1    0.833776    0.821093    0.679117    11.00000    0.02706    0.01503 =
         0.03170   -0.00569   -0.00006   -0.00183
C49   1    0.411489    0.758035    0.625821    11.00000    0.01640    0.02811 =
         0.02752   -0.00114    0.00147    0.00220
C18   1    0.410702    0.633089    0.540014    11.00000    0.02776    0.01978 =
         0.02044   -0.00120   -0.00270   -0.00151
C10   1    0.567373    0.654805    0.546413    11.00000    0.02501    0.01901 =
         0.02199   -0.00067    0.00336    0.00409
C35   1    0.692084    0.515509    0.672539    11.00000    0.03129    0.01666 =
         0.02035    0.00479   -0.00269   -0.00206
C13   1    0.446784    0.604654    0.502288    11.00000    0.03141    0.02360 =
         0.02162   -0.00232   -0.00066   -0.00152
C69   1    0.914048    0.832501    0.658339    11.00000    0.02950    0.03051 =
         0.02978    0.00228    0.00157   -0.00263
AFIX  43
H69   2    0.908925    0.836497    0.627105    11.00000   -1.20000
AFIX   0
F4    4    0.618774    0.271564    0.714128    11.00000    0.09876    0.03359 =
         0.15567    0.03553   -0.01935   -0.01431
C28   1    0.847260    0.601813    0.703582    11.00000    0.02280    0.01782 =
         0.02369   -0.00557   -0.00044    0.00263
C27   1    0.752311    0.887151    0.572193    11.00000    0.02854    0.02144 =
         0.03379    0.00901    0.00249   -0.00412
C47   1    0.451377    0.542399    0.630729    11.00000    0.02922    0.03100 =
         0.02511   -0.00301    0.00422   -0.00310
AFIX  43
H47   2    0.504741    0.537212    0.616041    11.00000   -1.20000
AFIX   0
C2    1    0.837785    0.625825    0.545585    11.00000    0.02862    0.03330 =
         0.02267   -0.00479    0.00353   -0.00125
C9    1    0.875873    0.551801    0.605973    11.00000    0.02903    0.02634 =
         0.02537   -0.00688    0.00093    0.00145
C40   1    0.703732    0.455356    0.646736    11.00000    0.04916    0.02612 =
         0.02853   -0.00292   -0.00498   -0.00202
AFIX  43
H40   2    0.741155    0.457264    0.623380    11.00000   -1.20000
AFIX   0
C1    1    0.772056    0.633371    0.574651    11.00000    0.02201    0.02162 =
         0.02167   -0.00282   -0.00014    0.00149
C46   1    0.401227    0.483697    0.640150    11.00000    0.03670    0.03022 =
         0.03077    0.00192   -0.00310   -0.00427
AFIX  43
H46   2    0.420053    0.439273    0.631316    11.00000   -1.20000
AFIX   0
C11   1    0.545897    0.618356    0.506751    11.00000    0.02756    0.02279 =
         0.02182   -0.00467    0.00190    0.00084
C4    1    0.902884    0.573910    0.564345    11.00000    0.02746    0.03418 =
         0.02636   -0.00995    0.00576    0.00128
C26   1    0.788375    0.950478    0.591287    11.00000    0.04551    0.02227 =
         0.04216    0.00807    0.00429   -0.00931
AFIX  43
H26   2    0.804056    0.955362    0.622273    11.00000   -1.20000
AFIX   0
C8    1    0.926555    0.501477    0.632387    11.00000    0.04226    0.02998 =
         0.03512   -0.00255    0.00083    0.01526
AFIX  43
H8    2    0.907137    0.486192    0.659373    11.00000   -1.20000
AFIX   0
C54   1    0.370162    0.792964    0.586867    11.00000    0.04274    0.03482 =
         0.02223   -0.00350    0.00162    0.00164
AFIX  43
H54   2    0.378694    0.775347    0.558581    11.00000   -1.20000
AFIX   0
F16   4    1.153959    0.893049    0.746293    11.00000    0.07292    0.08819 =
         0.19849    0.06192   -0.07501   -0.04984
C50   1    0.397004    0.785176    0.667654    11.00000    0.04516    0.03291 =
         0.02462   -0.00531    0.00382    0.00590
AFIX  43
H50   2    0.424890    0.763137    0.693765    11.00000   -1.20000
AFIX   0
F11   4    0.261234    0.975732    0.674965    11.00000    0.20609    0.06200 =
         0.06776   -0.00748    0.02078    0.07346
C17   1    0.315369    0.627015    0.546044    11.00000    0.02708    0.04026 =
         0.02567   -0.00387    0.00085    0.00040
AFIX  43
H17   2    0.291684    0.646453    0.570958    11.00000   -1.20000
AFIX   0
N5    3    0.625480    0.709673    0.754617    11.00000    0.06973    0.04130 =
         0.03010   -0.00026    0.01459   -0.00014
C33   1    0.923042    0.644447    0.695835    11.00000    0.03560    0.02029 =
         0.03170    0.00537   -0.00156    0.00177
AFIX  43
H33   2    0.917481    0.674123    0.670824    11.00000   -1.20000
AFIX   0
C36   1    0.636007    0.510969    0.706897    11.00000    0.04189    0.02770 =
         0.03676    0.00271    0.00621   -0.00430
AFIX  43
H36   2    0.626667    0.551251    0.723656    11.00000   -1.20000
AFIX   0
C20   1    0.691035    0.809378    0.517357    11.00000    0.03165    0.03205 =
         0.02684    0.00964    0.00175   -0.00093
C32   1    1.006584    0.643458    0.724714    11.00000    0.02612    0.02731 =
         0.04693   -0.00351   -0.00409   -0.00078
AFIX  43
H32   2    1.057103    0.671470    0.718724    11.00000   -1.20000
AFIX   0
C19   1    0.697774    0.776023    0.558128    11.00000    0.02309    0.02348 =
         0.02314    0.00105   -0.00134    0.00213
C64   1    0.843738    0.813600    0.726432    11.00000    0.03833    0.02997 =
         0.02802   -0.00166    0.00399   -0.00336
AFIX  43
H64   2    0.791181    0.803854    0.740940    11.00000   -1.20000
AFIX   0
F10   4    0.156224    0.934783    0.630635    11.00000    0.04936    0.04229 =
         0.35188   -0.01453    0.04477    0.01735
F13   4    0.428245    1.068867    0.698240    11.00000    0.20377    0.07582 =
         0.18674    0.03026    0.14083    0.07105
C43   1    0.346169    0.615642    0.666444    11.00000    0.03262    0.03769 =
         0.03639    0.01206    0.00856    0.00708
AFIX  43
H43   2    0.327377    0.659712    0.675906    11.00000   -1.20000
AFIX   0
C52   1    0.301858    0.878667    0.632353    11.00000    0.03185    0.02711 =
         0.04207    0.00022    0.00852    0.00404
C51   1    0.341239    0.844993    0.671016    11.00000    0.03640    0.03604 =
         0.03500   -0.00621    0.01221    0.00572
AFIX  43
H51   2    0.330700    0.862044    0.699171    11.00000   -1.20000
AFIX   0
C62   1    0.573359    0.904002    0.630279    11.00000    0.03946    0.02725 =
         0.04719    0.00048    0.00450   -0.00629
AFIX  43
H62   2    0.553294    0.873012    0.606888    11.00000   -1.20000
AFIX   0
C53   1    0.317120    0.853075    0.590209    11.00000    0.05052    0.03065 =
         0.03257    0.00796    0.00143    0.01126
AFIX  43
H53   2    0.291447    0.876611    0.564240    11.00000   -1.20000
AFIX   0
C5    1    0.985555    0.546025    0.550139    11.00000    0.03698    0.05138 =
         0.03241   -0.00703    0.00792    0.01144
AFIX  43
H5    2    1.006030    0.560893    0.523294    11.00000   -1.20000
AFIX   0
C3    1    0.845977    0.663583    0.502391    11.00000    0.03685    0.05774 =
         0.02969    0.00376    0.01415    0.00927
AFIX 137
H3A   2    0.815411    0.708762    0.502718    11.00000   -1.50000
H3B   2    0.816416    0.636010    0.477615    11.00000   -1.50000
H3C   2    0.911374    0.670277    0.499041    11.00000   -1.50000
AFIX   0
C22   1    0.727576    0.879705    0.525754    11.00000    0.03011    0.02763 =
         0.03541    0.01046    0.00402    0.00055
C56   1    0.653867    0.888097    0.659957    11.00000    0.03456    0.01237 =
         0.03587    0.00556    0.00679    0.00449
C38   1    0.604934    0.389577    0.691141    11.00000    0.04906    0.02695 =
         0.04443    0.01111   -0.01651   -0.01328
C68   1    1.001295    0.837992    0.683371    11.00000    0.02661    0.03944 =
         0.04149    0.00130    0.00083   -0.00226
AFIX  43
H68   2    1.054654    0.845023    0.668935    11.00000   -1.20000
AFIX   0
C39   1    0.659554    0.392952    0.655954    11.00000    0.05830    0.02224 =
         0.04105   -0.00352   -0.01215   -0.00637
AFIX  43
H39   2    0.666523    0.353054    0.638459    11.00000   -1.20000
AFIX   0
C6    1    1.035334    0.496416    0.576745    11.00000    0.04348    0.06275 =
         0.04861   -0.01490    0.00720    0.02401
AFIX  43
H6    2    1.089379    0.476935    0.567282    11.00000   -1.20000
AFIX   0
C21   1    0.653431    0.782060    0.471475    11.00000    0.06045    0.04786 =
         0.02190    0.01021   -0.00263   -0.00544
AFIX 137
H21A  2    0.705078    0.770942    0.454936    11.00000   -1.50000
H21B  2    0.614471    0.817537    0.455542    11.00000   -1.50000
H21C  2    0.616698    0.740234    0.474609    11.00000   -1.50000
AFIX   0
C61   1    0.523014    0.965683    0.635392    11.00000    0.03206    0.02324 =
         0.08029    0.00715    0.00920    0.00344
AFIX  43
H61   2    0.470274    0.976651    0.615154    11.00000   -1.20000
AFIX   0
C30   1    0.937973    0.560057    0.771736    11.00000    0.05056    0.04445 =
         0.03442    0.01378   -0.00820    0.00013
AFIX  43
H30   2    0.942241    0.532394    0.797647    11.00000   -1.20000
AFIX   0
C14   1    0.386154    0.568660    0.469464    11.00000    0.03835    0.04458 =
         0.02400   -0.01202   -0.00330   -0.00526
AFIX  43
H14   2    0.408796    0.549750    0.444131    11.00000   -1.20000
AFIX   0
C29   1    0.856022    0.560779    0.742659    11.00000    0.03600    0.04043 =
         0.02848    0.00833   -0.00307   -0.00386
AFIX  43
H29   2    0.805276    0.533385    0.749102    11.00000   -1.20000
AFIX   0
C12   1    0.609035    0.595348    0.473307    11.00000    0.03775    0.05313 =
         0.02584   -0.01707    0.00424    0.00158
AFIX 137
H12A  2    0.597682    0.624174    0.446745    11.00000   -1.50000
H12B  2    0.596472    0.546752    0.465434    11.00000   -1.50000
H12C  2    0.673624    0.600296    0.486198    11.00000   -1.50000
AFIX   0
C45   1    0.323058    0.490074    0.662636    11.00000    0.03471    0.04499 =
         0.03218    0.01647   -0.00794   -0.00796
C7    1    1.007496    0.474563    0.617188    11.00000    0.05130    0.05040 =
         0.04399   -0.00663   -0.00314    0.02146
AFIX  43
H7    2    1.043523    0.441272    0.634548    11.00000   -1.20000
AFIX   0
C57   1    0.681492    0.933371    0.695079    11.00000    0.04283    0.03289 =
         0.04312   -0.01108    0.00203    0.00195
AFIX  43
H57   2    0.734766    0.923238    0.715180    11.00000   -1.20000
AFIX   0
C37   1    0.593190    0.448367    0.717227    11.00000    0.04077    0.03598 =
         0.04181    0.01317    0.00095   -0.01174
AFIX  43
H37   2    0.557372    0.446005    0.741175    11.00000   -1.20000
AFIX   0
C66   1    1.009992    0.833066    0.730202    11.00000    0.03020    0.02242 =
         0.04267   -0.00379   -0.00822   -0.00046
F18   4    1.159313    0.786468    0.751304    11.00000    0.07039    0.07774 =
         0.27259   -0.04297   -0.09632    0.02513
C55   1    0.245220    0.945149    0.635651    11.00000    0.04782    0.02853 =
         0.06224   -0.00239    0.01212    0.00799
C44   1    0.296588    0.554874    0.675909    11.00000    0.03197    0.05598 =
         0.04698    0.01996    0.01292    0.00593
AFIX  43
H44   2    0.244477    0.558935    0.691599    11.00000   -1.20000
AFIX   0
C58   1    0.629087    0.995053    0.700583    11.00000    0.05569    0.03260 =
         0.07504   -0.02218    0.01438   -0.00169
AFIX  43
H58   2    0.647130    1.025331    0.724627    11.00000   -1.20000
AFIX   0
C23   1    0.739651    0.936102    0.496976    11.00000    0.05165    0.04545 =
         0.04444    0.02660    0.00182   -0.00575
AFIX  43
H23   2    0.723185    0.931590    0.466015    11.00000   -1.20000
AFIX   0
C15   1    0.292809    0.561848    0.475404    11.00000    0.03916    0.05526 =
         0.03673   -0.01196   -0.00661   -0.01568
AFIX  43
H15   2    0.252135    0.537681    0.453990    11.00000   -1.20000
AFIX   0
C31   1    1.014576    0.600352    0.762736    11.00000    0.03540    0.03429 =
         0.03890   -0.00370   -0.01120    0.00435
C65   1    0.930922    0.820662    0.751176    11.00000    0.03613    0.03556 =
         0.03315   -0.00734   -0.00786    0.00096
AFIX  43
H65   2    0.936554    0.817019    0.782437    11.00000   -1.20000
AFIX   0
C25   1    0.799631    1.005410    0.562025    11.00000    0.05028    0.02684 =
         0.06518    0.01499   -0.00027   -0.01102
AFIX  43
H25   2    0.823356    1.048347    0.573596    11.00000   -1.20000
AFIX   0
C48   1    0.268063    0.425528    0.670832    11.00000    0.04121    0.04779 =
         0.07335    0.02546    0.00003   -0.00894
C67   1    1.105025    0.839088    0.756687    11.00000    0.04577    0.03900 =
         0.05586   -0.00532   -0.02032   -0.00474
C59   1    0.552009    1.010472    0.670761    11.00000    0.04043    0.01968 =
         0.07980   -0.00150    0.02500    0.00109
C16   1    0.258076    0.590585    0.513025    11.00000    0.02958    0.04969 =
         0.03331   -0.00115   -0.00483   -0.01048
AFIX  43
H16   2    0.194460    0.585152    0.516075    11.00000   -1.20000
AFIX   0
F17   4    1.104163    0.844526    0.799387    11.00000    0.05484    0.36444 =
         0.06337   -0.02965   -0.02065   -0.03844
C41   1    0.559062    0.320587    0.699870    11.00000    0.06961    0.03832 =
         0.06511    0.01886   -0.02523   -0.02469
F14   4    0.451636    1.101330    0.639106    11.00000    0.24301    0.10984 =
         0.16551    0.04808    0.08522    0.13321
C24   1    0.776059    0.998118    0.514968    11.00000    0.06154    0.03686 =
         0.06178    0.02936    0.00252   -0.00746
AFIX  43
H24   2    0.785397    1.035861    0.496050    11.00000   -1.20000
AFIX   0
F1    4    1.177628    0.608295    0.773747    11.00000    0.04173    0.35774 =
         0.11318    0.04276   -0.02137    0.02295
C34   1    1.103560    0.596383    0.793160    11.00000    0.03781    0.07484 =
         0.05916    0.00959   -0.02135    0.00241
C60   1    0.497965    1.077174    0.676800    11.00000    0.07821    0.01879 =
         0.12830    0.00770    0.03893    0.00929
F3    4    1.116533    0.647293    0.820229    11.00000    0.11396    0.30639 =
         0.17727   -0.13535   -0.09904    0.05570
F2    4    1.116617    0.544477    0.815370    11.00000    0.12846    0.21598 =
         0.36147    0.21356   -0.18103   -0.08334
F15   4    0.545949    1.126464    0.691454    11.00000    0.10014    0.04821 =
         0.65400   -0.14166   -0.08012    0.03575
HKLF 4

REM  FF471_0m_a.res in P2(1)/c
REM R1 =  0.0666 for   12709 Fo > 4sig(Fo)  and  0.0880 for all   16238 data
REM    877 parameters refined using      0 restraints

END

WGHT      0.0445     40.0263

REM Highest difference peak  1.238,  deepest hole -0.786,  1-sigma level  0.097
Q1    1   1.1543  0.5390  0.7781  11.00000  0.05    1.24
Q2    1   0.5179  1.0930  0.7295  11.00000  0.05    1.19
Q3    1   0.5282  1.1274  0.6617  11.00000  0.05    1.00
Q4    1   0.6781  0.7380  0.6583  11.00000  0.05    0.98
Q5    1   0.5495  1.1292  0.6679  11.00000  0.05    0.93
Q6    1   1.0856  0.5842  0.8318  11.00000  0.05    0.93
Q7    1   0.6311  0.2572  0.6792  11.00000  0.05    0.92
Q8    1   0.6132  0.7359  0.6521  11.00000  0.05    0.87
Q9    1   1.1531  0.6451  0.7937  11.00000  0.05    0.87
Q10   1   0.1806  0.9525  0.5928  11.00000  0.05    0.87
Q11   1   0.6838  0.6586  0.6545  11.00000  0.05    0.86
Q12   1   1.1837  0.6183  0.7635  11.00000  0.05    0.85
Q13   1   0.6111  0.6588  0.6483  11.00000  0.05    0.81
Q14   1   1.1173  0.7947  0.7857  11.00000  0.05    0.78
Q15   1   0.7209  0.6980  0.6807  11.00000  0.05    0.76
Q16   1   0.2006  0.9490  0.6619  11.00000  0.05    0.75
Q17   1   1.1742  0.8389  0.7358  11.00000  0.05    0.70
Q18   1   0.5573  0.6973  0.6568  11.00000  0.05    0.68
Q19   1   0.5749  0.6946  0.6218  11.00000  0.05    0.62
Q20   1   1.1671  0.8909  0.7380  11.00000  0.05    0.61
;
_shelx_res_checksum   92700

_shelx_hkl_file
;
   2   0   0  516.05   23.30
   2   0   0  589.04   23.70
   3   0   0 2253.77   92.49
   3   0   0 2260.17   91.99
   3   0   0 2220.48   92.19
  -3   0   0 2286.57   92.99
  -3   0   0 2206.08   91.69
  -4   0   0  574.84   24.70
   4   0   0  562.74   25.40
   4   0   0  583.14   26.30
  -4   0   0  562.74   26.60
   4   0   0  617.04   25.00
   5   0   0  655.53   29.50
   5   0   0  690.73   29.00
   5   0   0  686.73   30.60
  -5   0   0  652.63   28.70
  -5   0   0  680.93   31.00
   6   0   0 1312.17   55.09
   6   0   0 1267.37   55.89
  -6   0   0 1305.17   57.99
  -6   0   0 1275.77   54.59
   6   0   0 1370.86   57.09
   7   0   0    8.00    6.10
  -7   0   0   15.90    5.00
   7   0   0   13.10    7.50
   8   0   0  384.86   20.80
  -8   0   0  393.96   19.30
   8   0   0  391.16   19.90
   8   0   0  451.15   24.50
  -8   0   0  357.66   23.10
   9   0   0    1.40    7.40
  -9   0   0   -4.40    4.40
   9   0   0    2.20    9.50
   9   0   0   -5.80    5.00
  10   0   0   52.49   11.60
  10   0   0   39.90    6.80
  10   0   0   49.00    9.80
 -10   0   0   50.89    8.10
 -10   0   0   32.00   11.10
  11   0   0  140.79   14.30
 -11   0   0  122.69   19.00
  11   0   0  164.58   13.10
  11   0   0  164.28   19.90
 -11   0   0  170.18   12.20
 -12   0   0  451.75   30.70
  12   0   0  476.15   25.20
  12   0   0  545.55   31.60
 -12   0   0  471.55   24.50
  12   0   0  473.65   26.60
 -13   0   0   99.29   11.90
  13   0   0  106.29   13.10
 -13   0   0  118.59   17.70
  13   0   0  115.39   16.80
  13   0   0  120.59   23.10
  14   0   0  240.68   18.20
  14   0   0  279.27   21.70
 -14   0   0  287.67   23.20
 -14   0   0  275.47   17.80
  14   0   0  246.28   25.90
 -15   0   0   17.70   13.50
 -15   0   0   -3.40    7.30
  15   0   0    3.50   10.70
 -16   0   0   38.00   12.70
 -16   0   0    2.00    7.50
  16   0   0    3.00   10.20
  17   0   0   -4.70   10.20
   2  -1   0  849.41   36.40
  -2  -1   0  859.11   36.90
   2  -1   0  864.91   36.50
  -2  -1   0  818.02   36.10
  -2   1   0  818.92   36.10
   2   1   0  931.01   36.50
   2   1   0  891.41   36.90
  -2   1   0  960.10   37.50
   3  -1   0 3479.25  144.09
   3  -1   0 3398.46  143.79
  -3  -1   0 3615.94  144.59
   3  -1   0 3341.37  143.99
  -3  -1   0 3537.85  143.49
  -3   1   0 3374.66  143.49
   3   1   0 3501.55  143.89
  -3   1   0 3713.73  144.99
   3   1   0 3624.94  144.49
   3   1   0 3671.03  143.69
   4  -1   0 1350.56   55.09
  -4  -1   0 1342.67   56.39
  -4  -1   0 1294.07   54.89
   4  -1   0 1292.57   55.59
   4  -1   0 1304.77   55.79
   4   1   0 1371.36   56.29
  -4   1   0 1379.36   56.89
   4   1   0 1381.96   55.19
  -4   1   0 1273.57   54.89
   4   1   0 1302.67   55.39
   5  -1   0  386.66   18.60
  -5  -1   0  377.16   17.50
   5  -1   0  401.96   19.40
  -5  -1   0  380.96   20.30
   5  -1   0  407.46   17.90
  -5   1   0  383.16   17.50
   5   1   0  405.06   17.90
  -5   1   0  384.66   20.90
   5   1   0  386.36   18.30
   5   1   0  396.36   19.70
   6  -1   0  318.37   17.30
  -6  -1   0  265.37   19.10
   6  -1   0  330.37   16.40
   6  -1   0  373.66   20.40
  -6  -1   0  312.87   15.60
   6   1   0  337.57   16.40
   6   1   0  310.07   17.00
   6   1   0  346.27   19.50
  -6   1   0  277.87   20.20
  -6   1   0  324.27   15.70
  -7  -1   0   62.29    7.20
   7  -1   0   75.49    9.70
   7  -1   0   71.29   11.00
   7   1   0   66.09    9.60
   7   1   0   64.09   10.30
  -7   1   0   62.59    8.30
  -8  -1   0  393.06   19.10
   8  -1   0  394.96   21.20
  -8  -1   0  366.46   23.10
   8  -1   0  412.76   20.10
   8  -1   0  448.56   23.80
   8   1   0  414.46   21.10
  -8   1   0  364.16   25.10
  -8   1   0  411.66   19.60
   8   1   0  404.66   20.20
   8   1   0  396.16   32.90
  -9  -1   0  147.19   16.70
   9  -1   0  186.18   14.40
  -9  -1   0  185.18   11.50
   9  -1   0  187.58   12.30
   9   1   0  182.78   12.20
  -9   1   0  182.98   11.40
  -9   1   0  146.59   17.40
   9   1   0  199.08   18.40
   9   1   0  177.28   14.20
  10  -1   0   34.90   10.70
 -10  -1   0   27.30    5.80
 -10  -1   0   10.40   10.40
  10  -1   0   30.70    6.80
  10  -1   0   25.90   14.80
  10   1   0   19.10    6.00
  10   1   0   29.80    8.90
 -10   1   0   24.70   11.20
  10   1   0   29.40   11.20
 -10   1   0   39.50    6.10
  11  -1   0  695.13   35.00
  11  -1   0  629.04   30.40
  11  -1   0  626.34   32.70
 -11  -1   0  620.44   34.30
 -11  -1   0  644.24   30.00
 -11   1   0  639.94   34.80
 -11   1   0  634.04   30.00
  11   1   0  586.54   31.40
  11   1   0  676.53   36.30
  11   1   0  621.54   30.40
  12  -1   0  310.87   19.00
 -12  -1   0  273.17   22.70
  12  -1   0  306.67   21.90
 -12  -1   0  297.67   18.60
  12  -1   0  343.97   24.80
  12   1   0  313.67   21.40
  12   1   0  347.27   26.80
 -12   1   0  295.27   23.40
  12   1   0  301.07   18.80
 -12   1   0  288.97   20.00
  13  -1   0  150.18   16.10
 -13  -1   0  160.28   13.40
  13  -1   0  157.18   21.40
 -13  -1   0  151.38   18.80
  13  -1   0  109.29   13.90
  13   1   0  110.29   13.50
  13   1   0  162.18   17.40
 -13   1   0  158.78   13.20
  13   1   0  138.99   22.70
 -13   1   0  159.38   18.90
  14  -1   0  -14.60   12.50
  14  -1   0    9.80   10.10
  14  -1   0  -12.40    7.40
 -14  -1   0    6.60    7.10
 -14  -1   0   21.20   12.70
  14   1   0  -15.00   13.70
  14   1   0    7.60    9.60
 -14   1   0    1.30    6.80
 -14   1   0   24.30   12.70
  15  -1   0  100.59   17.30
  15  -1   0  113.79   16.10
 -15  -1   0  110.59   12.80
 -15   1   0  128.19   13.40
  15   1   0  106.59   18.60
  15   1   0  139.29   17.80
  16  -1   0   -7.40    9.90
 -16  -1   0   -7.60    7.00
  16   1   0   -0.70   11.00
 -16   1   0  -11.70    7.00
  17  -1   0   16.50   11.50
   1  -2   0  164.18    6.70
   1   2   0  136.79    6.60
   2  -2   0  673.33   28.10
  -2  -2   0  642.64   28.00
   2  -2   0  661.33   28.50
   2  -2   0  681.83   28.80
  -2  -2   0  639.44   28.80
  -2   2   0  633.94   28.00
   2   2   0  726.63   28.20
  -2   2   0  741.93   30.20
   2   2   0  646.44   29.20
   2   2   0  679.03   28.40
  -3  -2   0 1621.44   66.79
   3  -2   0 1613.94   67.49
   3  -2   0 1553.44   66.99
  -3  -2   0 1642.54   67.99
   3  -2   0 1634.84   66.99
   3   2   0 1639.74   67.99
   3   2   0 1683.83   66.99
   3   2   0 1736.93   67.19
  -3   2   0 1578.94   66.69
  -3   2   0 1690.13   68.59
  -3   2   0 1520.95   67.69
  -4  -2   0 3255.77  136.29
   4  -2   0 3305.67  137.09
   4  -2   0 3569.64  136.79
   4  -2   0 3132.79  136.69
  -4  -2   0 3339.07  137.59
   4   2   0 3450.45  136.89
  -4   2   0 3147.59  136.19
   4   2   0 3395.66  137.69
   4   2   0 3342.67  136.69
  -4   2   0 3488.75  138.29
   5  -2   0  396.46   19.60
   5  -2   0  403.96   18.50
  -5  -2   0  393.06   18.10
   5  -2   0  399.96   19.60
  -5  -2   0  395.56   20.70
  -5   2   0  409.86   22.00
   5   2   0  412.36   18.50
   5   2   0  405.16   20.50
  -5   2   0  401.86   18.10
   5   2   0  401.46   19.10
  -6  -2   0 1435.36   63.39
   6  -2   0 1448.16   61.39
   6  -2   0 1478.55   62.49
  -6  -2   0 1444.96   60.99
   6  -2   0 1449.26   62.39
   6   2   0 1546.65   64.19
  -6   2   0 1402.26   60.89
  -6   2   0 1457.15   64.19
   6   2   0 1483.65   61.39
   6   2   0 1456.65   62.09
  -7  -2   0 1127.19   48.20
  -7  -2   0 1057.19   51.49
   7  -2   0 1203.38   50.69
   7  -2   0 1124.99   49.99
   7  -2   0 1145.09   48.60
   7   2   0 1203.18   52.39
  -7   2   0 1106.99   51.99
   7   2   0 1154.58   48.60
   7   2   0 1107.39   49.20
  -7   2   0 1088.59   48.10
   8  -2   0  159.08   13.20
  -8  -2   0  139.69   15.00
   8  -2   0  194.38   16.30
  -8  -2   0  168.38   11.00
   8  -2   0  177.08   12.10
  -8   2   0  172.68   11.10
   8   2   0  176.48   11.90
  -8   2   0  135.89   16.30
   8   2   0  163.18   13.50
  -9  -2   0   21.80    9.30
  -9  -2   0   40.80    5.80
   9  -2   0   37.40    8.90
   9  -2   0   31.20    6.40
   9  -2   0   45.60    8.90
   9   2   0   36.60   10.10
   9   2   0   35.90    8.00
   9   2   0   21.60    5.60
  -9   2   0   44.60    6.00
  -9   2   0   30.30   11.40
  10  -2   0  101.69   15.80
  10  -2   0   76.89   10.00
 -10  -2   0   76.39   13.60
 -10  -2   0   91.39    9.40
  10  -2   0   90.89   15.80
 -10   2   0   73.49   14.90
 -10   2   0   89.99    9.40
  10   2   0   77.79   12.10
  10   2   0   90.79   18.10
  10   2   0   70.39   10.20
  11  -2   0   35.70    9.60
 -11  -2   0   48.00    7.20
 -11  -2   0   32.30   11.70
  11  -2   0   40.60   11.30
  11  -2   0   32.20    7.90
  11   2   0   44.40   10.00
  11   2   0   26.40    7.00
  11   2   0   36.20   13.10
 -11   2   0   41.70    7.00
 -11   2   0   24.30   12.00
  12  -2   0   59.29   13.40
  12  -2   0   66.79   11.70
 -12  -2   0   51.59   13.50
 -12  -2   0   78.29   10.70
  12  -2   0   64.79    9.50
  12   2   0   56.99    9.30
 -12   2   0   77.89   14.90
  12   2   0   85.29   14.50
  12   2   0   67.89   16.00
 -13  -2   0  171.98   13.90
 -13  -2   0  157.88   21.40
  13  -2   0  181.68   17.30
  13  -2   0  139.09   15.60
  13  -2   0  189.08   20.80
 -13   2   0  167.08   19.50
  13   2   0  167.98   21.70
  13   2   0  143.59   15.00
 -13   2   0  196.58   14.40
  13   2   0  171.28   16.20
  14  -2   0  159.08   21.40
 -14  -2   0  164.08   14.20
 -14  -2   0  182.28   19.20
  14  -2   0  184.08   17.80
  14  -2   0  166.08   15.40
  14   2   0  133.39   24.60
 -14   2   0  181.88   14.60
 -14   2   0  187.38   20.20
  14   2   0  188.78   18.40
  14   2   0  164.18   15.00
  15  -2   0   33.30   11.60
 -15  -2   0   26.60    8.10
  15  -2   0    0.60   13.30
 -15  -2   0   56.79   14.70
  15   2   0    9.70   15.20
 -15   2   0   38.00   13.40
 -15   2   0   16.10    7.50
  15   2   0   33.90   10.50
  16  -2   0   -7.30   13.40
  16  -2   0   29.10   11.60
 -16  -2   0   17.60    7.60
  16   2   0   32.30   12.20
 -16   2   0   44.70   12.90
 -16   2   0   16.10    8.10
  16   2   0  -13.00   15.60
  17  -2   0   44.50   13.10
 -17  -2   0   56.49    9.90
  17  -2   0   16.00   15.20
  17   2   0   59.09   13.50
 -17   2   0   53.29    9.70
   0  -3   0   -2.60    1.70
   0  -3   0    0.70    1.80
   0   3   0   -3.50    1.90
   0   3   0   -2.60    1.70
  -1  -3   0    1.30    1.90
  -1  -3   0   -3.50    2.20
   1  -3   0   -1.20    2.10
   1  -3   0    5.60    2.80
  -1   3   0   -0.70    1.90
   1   3   0    4.30    2.40
   1   3   0    0.30    2.10
   2  -3   0 1903.91   75.49
  -2  -3   0 1785.02   75.99
  -2  -3   0 1805.02   75.39
   2  -3   0 1813.72   75.89
   2   3   0 1948.21   75.49
  -2   3   0 1942.91   76.89
   2   3   0 1809.12   76.39
  -2   3   0 1773.82   75.39
   2   3   0 1869.81   75.59
  -2   3   0 1795.62   75.39
  -3  -3   0    2.60    4.30
   3  -3   0   18.80    4.20
   3  -3   0   12.20    3.40
   3  -3   0   18.70    3.50
  -3  -3   0   11.60    2.30
  -3   3   0   12.40    2.70
  -3   3   0   11.90    3.60
   3   3   0   10.50    3.50
   3   3   0   13.40    3.20
  -3   3   0    7.20    6.90
  -4  -3   0 1072.39   46.40
   4  -3   0 1081.99   47.20
   4  -3   0 1153.68   46.70
   4  -3   0 1077.99   46.70
  -4  -3   0 1105.29   47.70
   4   3   0 1131.49   48.20
   4   3   0 1196.88   46.90
  -4   3   0 1083.09   46.40
  -4   3   0 1134.59   48.70
   4   3   0 1132.99   46.70
  -5  -3   0 1816.52   76.99
   5  -3   0 1911.91   75.49
   5  -3   0 1803.42   76.19
   5  -3   0 1764.12   75.69
  -5  -3   0 1761.22   75.19
   5   3   0 1832.72   75.79
  -5   3   0 1870.11   77.79
   5   3   0 1870.11   77.39
  -5   3   0 1759.62   75.19
   5   3   0 1820.42   75.39
  -6  -3   0  180.48   11.00
   6  -3   0  180.78   13.60
   6  -3   0  193.68   12.50
   6  -3   0  211.18   14.50
  -6   3   0  180.08   11.20
  -6   3   0  142.19   17.60
   6   3   0  195.28   13.30
   6   3   0  174.28   12.10
   6   3   0  172.28   16.90
   7  -3   0  359.76   20.10
  -7  -3   0  371.56   18.00
   7  -3   0  375.96   20.30
   7  -3   0  376.46   18.90
  -7  -3   0  317.27   21.40
   7   3   0  376.96   18.80
   7   3   0  370.76   19.90
  -7   3   0  385.36   17.80
  -7   3   0  317.97   24.90
   8  -3   0   36.30    8.10
   8  -3   0   31.40    8.30
  -8  -3   0   12.20    8.90
  -8  -3   0   52.99    7.30
   8  -3   0   34.00    6.40
   8   3   0   39.10   11.10
   8   3   0   24.10    5.90
   8   3   0   32.60    7.70
   9  -3   0   10.50    8.00
   9  -3   0   11.00    5.70
  -9  -3   0   13.90    4.90
  -9  -3   0    4.10    8.40
   9  -3   0    7.50    8.10
   9   3   0    3.50    5.20
   9   3   0    9.40    7.20
  -9   3   0   12.30    5.00
   9   3   0   15.20    9.40
  -9   3   0    6.10    9.60
  10  -3   0    7.90    9.90
 -10  -3   0   14.30    5.40
 -10  -3   0   -0.60    9.30
  10  -3   0   12.60    8.00
  10  -3   0    0.60    5.50
 -10   3   0   -5.70   11.40
  10   3   0    8.40   11.50
  10   3   0    4.60    7.60
 -10   3   0   12.50    5.30
  10   3   0    5.10    5.50
 -11  -3   0    7.30    5.70
  11  -3   0   -3.70    6.80
 -11  -3   0   -6.10   10.10
  11  -3   0   15.20    9.90
  11  -3   0    5.70    9.80
 -11   3   0    3.40    5.80
 -11   3   0   -7.10   10.90
  11   3   0    7.50    7.90
  11   3   0   11.30   13.30
  11   3   0    7.60    6.70
  12  -3   0  110.39   16.60
 -12  -3   0  118.99   16.60
  12  -3   0   94.39   12.70
  12  -3   0  126.69   19.20
  12   3   0  103.39   13.10
  12   3   0   87.59   12.30
  12   3   0  131.99   20.80
 -12   3   0  121.99   18.30
 -13  -3   0   39.30   13.30
  13  -3   0   37.70   12.90
  13  -3   0   24.90    8.70
 -13  -3   0   36.70    7.80
  13  -3   0   25.90   10.90
  13   3   0   40.10   16.40
 -13   3   0   30.70    7.80
  13   3   0   36.40   10.80
 -13   3   0   20.40   13.10
  13   3   0   34.70    8.30
  14  -3   0   14.10   12.90
  14  -3   0   31.00   11.30
  14  -3   0    8.10    8.10
 -14  -3   0   33.50   12.60
 -14  -3   0   11.40    7.20
 -14   3   0   26.80    8.20
  14   3   0    9.10   13.70
 -14   3   0   44.20   14.80
  14   3   0   19.60   11.00
  14   3   0    2.90    7.80
  15  -3   0   55.29   13.80
 -15  -3   0   31.40    7.80
  15  -3   0   17.00   12.70
 -15   3   0   32.00    8.10
 -15   3   0   68.59   16.40
  15   3   0    2.30   16.10
  15   3   0   41.50   11.80
 -16  -3   0   53.29    9.20
  16  -3   0   60.29   15.20
  16   3   0   66.19   12.70
 -16   3   0   58.19    9.90
  17  -3   0    4.00   13.10
  17   3   0   12.50   11.10
   0  -4   0 2237.98   93.89
   0   4   0 2245.38   94.19
   0   4   0 2357.36   93.79
   0   4   0 2351.86   93.99
  -1  -4   0    7.40    2.70
   1  -4   0    4.10    2.60
  -1  -4   0    8.20    2.40
   1  -4   0    7.00    3.40
  -1   4   0    5.00    2.50
   1   4   0    4.80    2.50
   1   4   0    7.70    2.80
   2  -4   0   20.50    3.90
   2  -4   0   21.30    3.10
  -2  -4   0   16.70    3.70
   2  -4   0   27.30    4.20
  -2  -4   0   26.80    3.80
  -2   4   0   27.50    6.00
   2   4   0   20.40    3.10
   2   4   0   28.10    4.60
  -2   4   0   26.50    3.20
   3  -4   0  875.51   35.10
  -3  -4   0  812.22   35.90
   3  -4   0  831.82   35.40
  -3  -4   0  815.12   35.00
   3  -4   0  825.52   35.80
   3   4   0  824.22   36.60
   3   4   0  847.22   35.30
  -3   4   0  832.02   35.00
   3   4   0  906.31   35.10
  -3   4   0  846.72   37.20
  -3   4   0  762.32   35.10
   4  -4   0  475.35   20.30
   4  -4   0  438.86   21.00
  -4  -4   0  433.46   19.90
   4  -4   0  472.95   20.40
  -4  -4   0  436.26   21.20
   4   4   0  483.75   20.40
  -4   4   0  456.15   22.90
   4   4   0  455.75   20.30
  -4   4   0  444.46   20.00
   4   4   0  445.06   22.40
  -5  -4   0  101.79    7.80
   5  -4   0  114.49    9.30
   5  -4   0  114.09    9.20
   5  -4   0  107.79   10.00
   5   4   0  104.09    8.90
   5   4   0  111.19    8.80
  -5   4   0   98.89    7.90
  -5   4   0   99.59   14.20
  -6  -4   0   17.80    4.90
   6  -4   0   23.00    6.90
   6  -4   0   18.20    8.00
   6  -4   0   29.60    6.70
  -6   4   0   20.70    5.00
  -6   4   0   -2.00   13.00
   6   4   0   15.50    7.00
   6   4   0   -4.20    9.90
   6   4   0   19.00    5.90
   7  -4   0  502.45   23.00
  -7  -4   0  478.95   22.30
   7  -4   0  497.85   24.20
   7  -4   0  477.75   25.10
  -7  -4   0  435.06   25.00
   7   4   0  465.35   23.50
  -7   4   0  425.46   28.40
   7   4   0  499.05   28.50
   7   4   0  479.05   22.90
  -7   4   0  479.55   22.40
   8  -4   0   24.10    7.30
  -8  -4   0   23.30    4.70
  -8  -4   0   20.90    8.60
   8  -4   0   27.70    6.00
   8  -4   0   28.50    8.50
   8   4   0   24.00    7.30
  -8   4   0   12.70   10.00
   8   4   0   33.10   11.00
   8   4   0   15.20    5.40
  -8   4   0   21.30    4.80
   9  -4   0  167.38   13.80
   9  -4   0  168.88   14.40
  -9  -4   0  162.68   11.30
   9  -4   0  150.78   12.10
  -9  -4   0  178.18   15.00
   9   4   0  171.68   13.20
   9   4   0  169.38   19.20
  -9   4   0  170.28   18.40
   9   4   0  159.88   11.90
  -9   4   0  180.68   11.60
  10  -4   0    6.30    8.30
  10  -4   0    2.40    6.00
 -10  -4   0    6.80    9.40
  10  -4   0    7.80    8.40
 -10  -4   0    8.80    5.30
  10   4   0   -1.40    5.90
  10   4   0   11.50    7.90
 -10   4   0    0.50   11.70
  10   4   0   11.70   12.20
 -10   4   0    1.60    5.20
  11  -4   0   16.20   10.60
 -11  -4   0   -1.80   11.40
  11  -4   0    4.20    6.90
  11  -4   0    7.60    9.30
 -11  -4   0    9.30    5.80
  11   4   0    0.40    6.40
 -11   4   0   -5.40   11.20
  11   4   0    4.70    8.60
  11   4   0    9.60   12.10
 -11   4   0   13.50    6.60
  12  -4   0  354.66   22.90
  12  -4   0  357.76   24.70
  12  -4   0  364.66   20.80
 -12  -4   0  342.57   25.90
  12   4   0  406.16   30.30
  12   4   0  361.76   22.40
  12   4   0  361.66   20.80
 -12   4   0  326.67   22.90
 -12   4   0  355.16   26.10
  13  -4   0    7.00   11.10
  13  -4   0   12.60   10.40
 -13  -4   0    9.80    7.00
 -13  -4   0   12.60   12.90
 -13   4   0    7.80   14.10
 -13   4   0   10.50    7.30
  13   4   0    1.70   15.60
  13   4   0   10.70   10.10
  13   4   0    0.60    7.40
  14  -4   0   10.10   12.30
 -14  -4   0   34.30   13.80
  14  -4   0    2.50    7.30
 -14  -4   0    9.50    7.30
  14  -4   0    7.00   11.40
 -14   4   0   18.80    7.60
 -14   4   0   30.90   12.80
  14   4   0   17.30   10.30
  14   4   0   -3.40   15.00
  14   4   0   -7.50    7.30
  15  -4   0  -16.40   11.70
 -15  -4   0  -10.80    6.80
 -15  -4   0   24.70   13.20
 -15   4   0   -7.80    6.40
  15   4   0    4.20   10.10
 -15   4   0   21.60   12.50
 -16  -4   0   -1.90    7.00
  16  -4   0   -0.60   12.60
  16   4   0    4.00    9.70
 -16   4   0    1.80    7.40
 -17  -4   0   20.20    8.30
  17  -4   0   32.20   13.20
 -17   4   0   22.80    8.70
  17   4   0   33.00   11.50
   0  -5   0   -8.80    2.00
   0   5   0   -9.60    2.90
   0   5   0   -7.50    2.60
  -1  -5   0  253.27   11.20
   1  -5   0  229.58   11.10
  -1  -5   0  247.68   11.40
   1  -5   0  244.18   11.60
   1   5   0  235.98   10.80
   1   5   0  214.48   12.20
   1   5   0  239.98   11.40
  -1   5   0  254.87   12.50
  -1   5   0  223.88   11.10
  -1   5   0  233.98   11.30
   2  -5   0   39.00    3.90
   2  -5   0   37.10    4.70
  -2  -5   0   40.50    3.70
  -2  -5   0   27.00    4.40
  -2   5   0   36.50    3.50
   2   5   0   39.90    4.20
  -2   5   0   35.20    3.90
  -2   5   0   43.80    7.80
  -3  -5   0  258.97   12.40
  -3  -5   0  261.17   13.30
   3  -5   0  272.07   12.70
   3  -5   0  265.87   13.60
   3  -5   0  263.67   12.30
   3   5   0  282.77   12.40
  -3   5   0  257.37   12.40
   3   5   0  262.27   12.70
  -3   5   0  268.77   15.50
   3   5   0  250.27   14.70
   4  -5   0  108.59    7.30
  -4  -5   0   86.79    6.70
  -4  -5   0   85.09    8.80
   4  -5   0   92.49    8.30
   4  -5   0   97.89    7.80
  -4   5   0  100.49    7.00
  -4   5   0  113.19   13.70
   4   5   0   91.59    6.80
   4   5   0   93.09    7.50
   4   5   0   64.99   10.90
   5  -5   0   30.90    7.60
   5  -5   0   27.90    6.10
  -5  -5   0   31.70    5.00
   5   5   0   21.30    6.30
  -5   5   0   39.20   12.80
   5   5   0   37.40    6.10
  -5   5   0   20.70    4.90
   6  -5   0   39.60    7.00
   6  -5   0   44.30    9.50
  -6  -5   0   46.90    6.60
   6  -5   0   35.40    6.90
  -6  -5   0   15.70    9.30
   6   5   0   33.70    7.20
  -6   5   0   23.50   13.50
   6   5   0   10.10   14.40
   6   5   0   31.90    5.80
  -6   5   0   32.50    5.60
  -7  -5   0  132.39    9.10
   7  -5   0  143.59   12.70
   7  -5   0  140.99   11.10
  -7  -5   0   96.79   13.80
   7  -5   0  134.19   11.80
   7   5   0  131.69   10.80
  -7   5   0  102.59   18.20
   7   5   0  125.09   11.20
  -7   5   0  138.89   10.10
   7   5   0  125.89   17.80
   8  -5   0  183.18   13.80
   8  -5   0  172.68   13.20
   8  -5   0  178.48   12.10
  -8  -5   0  139.19   13.70
  -8  -5   0  178.08   10.70
  -8   5   0  146.69   18.00
   8   5   0  175.08   11.80
   8   5   0  157.48   18.70
   8   5   0  151.98   12.20
  -8   5   0  193.78   11.50
  -9  -5   0    6.70    9.10
   9  -5   0    5.80   12.10
   9  -5   0   12.60    5.60
   9  -5   0    9.50    7.00
  -9  -5   0    9.00    5.10
   9   5   0    6.60    6.40
   9   5   0   12.00   11.30
  -9   5   0   13.20    4.80
   9   5   0   15.60    5.90
  -9   5   0    5.60   10.90
  10  -5   0  115.89   13.60
  10  -5   0   99.19   11.40
 -10  -5   0  122.69   10.50
  10  -5   0  123.09   13.70
 -10  -5   0  105.29   15.50
  10   5   0  117.79   20.60
 -10   5   0  102.09   18.50
 -10   5   0  133.29   10.20
  10   5   0  112.89   12.50
  10   5   0  103.59   10.90
 -11  -5   0  194.38   17.90
  11  -5   0  221.48   19.00
  11  -5   0  202.48   15.20
  11  -5   0  212.88   18.00
 -11  -5   0  199.48   14.30
  11   5   0  185.38   18.90
 -11   5   0  212.48   14.80
  11   5   0  207.78   14.80
 -11   5   0  219.48   20.80
  11   5   0  215.88   22.40
  12  -5   0   26.90   10.70
 -12  -5   0   28.60    9.20
 -12  -5   0    9.40   11.40
  12  -5   0   23.30    7.80
  12  -5   0   21.80   10.30
 -12   5   0   33.30   14.90
 -12   5   0   20.70    7.00
  12   5   0   11.60   13.80
  12   5   0   15.60    7.70
  12   5   0   22.70    9.30
 -13  -5   0    4.90    6.80
  13  -5   0   11.30   11.90
 -13  -5   0    7.70   11.20
  13  -5   0   -0.20    7.60
  13  -5   0    6.10   10.40
 -13   5   0   23.20    7.70
  13   5   0    6.10   15.90
 -13   5   0   18.40   13.00
  13   5   0    1.80    9.10
  13   5   0   -6.10    6.70
 -14  -5   0   50.09    8.80
  14  -5   0   40.40   12.30
  14  -5   0   38.40   11.90
 -14  -5   0   48.60   13.10
  14   5   0   40.50   15.70
  14   5   0   52.59   11.30
 -14   5   0   38.20    8.40
 -14   5   0   64.29   16.00
 -15  -5   0  -10.60    6.40
  15  -5   0   -4.70   10.80
 -15  -5   0   14.70   11.20
 -15   5   0   27.00   14.00
 -15   5   0   -5.40    6.90
  15   5   0    3.90    9.50
 -16  -5   0   -1.20    6.60
 -16  -5   0    7.10    9.70
  16  -5   0   -0.40   13.20
  16   5   0   -4.70    9.30
 -16   5   0   -5.40    6.50
  17  -5   0   20.60   14.80
 -17  -5   0   15.70    7.70
  17   5   0   36.40   10.90
 -17   5   0   25.50    8.90
   0  -6   0  728.23   31.10
   0   6   0  735.13   31.50
   0   6   0  741.03   31.20
  -1  -6   0    8.50    2.80
  -1  -6   0    8.20    2.60
   1  -6   0    9.50    2.70
   1  -6   0    9.60    3.40
   1   6   0    7.90    2.80
  -1   6   0    7.10    4.20
   1   6   0    6.70    3.60
  -1   6   0    6.10    2.50
   1   6   0    8.30    2.50
  -1   6   0    9.60    2.80
  -2  -6   0  604.34   26.00
   2  -6   0  626.64   26.60
   2  -6   0  616.24   26.00
  -2  -6   0  583.24   26.30
   2   6   0  594.24   26.00
  -2   6   0  615.34   27.60
  -2   6   0  588.54   26.00
  -2   6   0  612.34   25.70
   2   6   0  569.34   27.00
   2   6   0  626.44   25.70
  -3  -6   0  440.26   19.40
   3  -6   0  424.26   20.50
   3  -6   0  440.96   19.60
  -3  -6   0  427.46   20.20
   3   6   0  452.75   19.20
  -3   6   0  418.56   19.40
  -3   6   0  429.76   22.40
   3   6   0  453.85   19.80
   3   6   0  400.46   21.80
  -4  -6   0   20.60    6.80
   4  -6   0   36.90    7.60
   4  -6   0   24.10    4.70
  -4  -6   0   25.00    4.40
   4  -6   0   26.00    5.50
  -4   6   0   38.80   11.40
   4   6   0   21.30    5.00
   4   6   0   28.10    5.30
  -4   6   0   21.00    4.60
  -5  -6   0 1222.18   53.69
  -5  -6   0 1176.18   52.09
   5  -6   0 1273.87   52.69
   5  -6   0 1203.78   53.49
   5  -6   0 1255.27   52.29
   5   6   0 1109.29   55.49
  -5   6   0 1310.57   56.79
   5   6   0 1293.87   52.39
  -5   6   0 1266.67   52.29
   5   6   0 1244.98   52.59
  -6  -6   0 1009.70   43.90
   6  -6   0 1040.20   44.50
   6  -6   0  998.00   45.50
  -6  -6   0  982.60   46.00
   6  -6   0 1081.29   44.30
   6   6   0 1054.99   44.40
   6   6   0 1000.80   47.90
  -6   6   0 1012.00   44.00
   6   6   0 1042.00   44.40
  -6   6   0 1013.00   48.80
   7  -6   0  519.45   24.20
  -7  -6   0  485.05   26.20
  -7  -6   0  509.85   23.50
   7  -6   0  495.25   25.60
   7  -6   0  503.35   24.10
  -7   6   0  530.35   23.70
   7   6   0  507.35   24.00
   7   6   0  508.35   23.90
  -7   6   0  491.05   28.20
   7   6   0  478.85   27.50
  -8  -6   0   -1.90    7.00
   8  -6   0    1.40    8.00
   8  -6   0   -6.00    5.50
  -8  -6   0   -0.70    4.40
   8  -6   0    4.40    5.60
   8   6   0    1.80    5.00
  -8   6   0    3.60    4.80
   8   6   0    1.50    5.80
  -8   6   0   -1.10    9.40
   8   6   0   -2.60    9.00
   9  -6   0   22.80    9.70
   9  -6   0   16.00    6.10
   9  -6   0   17.20    6.90
  -9  -6   0   18.60    8.70
   9   6   0   15.70    5.60
  -9   6   0   23.10    5.60
   9   6   0   24.60    7.00
   9   6   0   12.00   10.40
  -9   6   0   20.00   11.70
  10  -6   0   20.00    9.50
 -10  -6   0   10.30    9.30
  10  -6   0   12.60    6.90
 -10  -6   0   14.20    5.80
  10  -6   0   18.60    8.00
  10   6   0   19.10    8.00
  10   6   0   15.10    6.50
 -10   6   0   11.80   12.80
  10   6   0   12.50   11.90
 -10   6   0   27.80    6.70
 -11  -6   0   -0.80    9.80
 -11  -6   0   12.80    6.20
  11  -6   0    1.10    7.00
  11  -6   0    8.80    9.70
 -11   6   0    7.40    6.60
  11   6   0   19.00   14.60
 -11   6   0   -2.20   13.40
  11   6   0   -3.90    6.30
 -12  -6   0   35.80    7.70
 -12  -6   0   39.30   11.90
  12  -6   0   42.20    8.80
  12  -6   0   34.00   10.00
  12  -6   0   48.20   12.80
 -12   6   0   29.00   13.50
 -12   6   0   38.20    7.90
  12   6   0   35.40    8.30
  12   6   0   42.40   16.30
  12   6   0   31.30    9.60
  13  -6   0   12.40   10.80
 -13  -6   0   14.90   12.60
  13  -6   0   -2.90    9.50
 -13  -6   0   12.70    6.90
  13  -6   0    9.10    7.80
  13   6   0    6.40    9.20
 -13   6   0    9.30    7.40
  13   6   0   -3.60    6.70
 -13   6   0   16.80   14.60
  13   6   0    2.70   14.30
  14  -6   0  109.89   11.50
 -14  -6   0  111.19   12.60
  14  -6   0  105.29   16.10
  14  -6   0   96.19   17.70
 -14  -6   0  109.39   18.20
 -14   6   0  125.79   18.40
 -14   6   0  115.59   13.60
  14   6   0   97.89   13.90
  14   6   0  100.59   20.10
  14   6   0   78.99   11.20
 -15  -6   0   26.70   11.60
  15  -6   0    0.90   13.20
  15  -6   0  -14.00   10.90
 -15  -6   0    3.70    7.50
  15   6   0    9.20    9.10
 -15   6   0    1.50    7.60
  15   6   0   -9.50   15.20
 -16  -6   0   25.60   11.30
  16  -6   0  -19.30   10.70
  16   6   0    5.90    9.40
 -16   6   0   -2.30    7.50
  17  -6   0    9.10   14.20
 -17  -6   0    4.10    7.30
  17   6   0   -4.60    8.70
 -17   6   0    1.50    8.20
   0  -7   0   -3.10    2.80
   0   7   0    0.50    4.90
   0   7   0   -0.80    2.80
   1  -7   0  492.85   22.70
   1  -7   0  551.34   23.20
  -1  -7   0  498.65   22.70
  -1  -7   0  539.85   23.10
   1   7   0  527.65   22.40
  -1   7   0  508.35   22.90
   1   7   0  512.15   22.90
   1   7   0  512.95   23.60
  -1   7   0  509.75   22.90
  -1   7   0  540.05   24.20
  -2  -7   0  545.75   23.90
   2  -7   0  518.65   23.40
  -2  -7   0  507.95   23.20
   2  -7   0  567.74   24.20
  -2   7   0  517.05   23.40
   2   7   0  489.65   25.00
  -2   7   0  513.75   23.00
   2   7   0  511.45   23.50
  -2   7   0  565.34   25.20
   2   7   0  534.65   23.00
   3  -7   0  853.81   36.50
  -3  -7   0  824.22   35.40
  -3  -7   0  786.02   36.00
   3  -7   0  831.02   35.50
  -3   7   0  782.52   35.20
   3   7   0  859.21   35.00
   3   7   0  775.12   37.80
  -3   7   0  853.31   38.20
  -3   7   0  799.92   34.70
   3   7   0  858.11   35.70
  -4  -7   0  436.56   20.80
   4  -7   0  463.85   22.30
  -4  -7   0  425.96   22.30
   4   7   0  444.76   21.50
  -4   7   0  508.05   26.90
   4   7   0  447.16   20.60
  -4   7   0  448.86   21.10
   4   7   0  404.66   24.30
   5  -7   0 1771.52   73.09
   5  -7   0 1734.93   74.59
  -5  -7   0 1723.63   74.79
   5  -7   0 1827.62   73.79
  -5  -7   0 1726.33   73.29
   5   7   0 1688.53   75.79
  -5   7   0 1718.93   73.29
   5   7   0 1787.32   73.19
  -5   7   0 1775.82   77.09
   5   7   0 1825.92   73.79
   6  -7   0  269.17   17.30
  -6  -7   0  243.98   16.80
   6  -7   0  269.57   14.20
   6  -7   0  266.37   15.10
  -6  -7   0  264.97   14.20
   6   7   0  256.27   14.80
  -6   7   0  273.57   21.80
  -6   7   0  266.57   14.50
   6   7   0  260.87   14.50
   6   7   0  226.88   18.60
  -7  -7   0  220.88   15.50
   7  -7   0  242.68   13.80
  -7  -7   0  234.98   13.40
   7  -7   0  236.28   15.80
   7  -7   0  236.78   14.30
   7   7   0  244.18   14.10
   7   7   0  226.68   19.80
   7   7   0  246.08   14.00
  -7   7   0  239.68   19.00
  -7   7   0  243.98   13.80
  -8  -7   0    3.60    7.10
  -8  -7   0    7.10    4.50
   8  -7   0    2.60    5.30
   8  -7   0   10.00    5.70
   8  -7   0   11.10    8.50
  -8   7   0    2.40    9.80
   8   7   0   -4.20   10.00
  -8   7   0    6.20    4.50
   8   7   0    2.00    4.80
   8   7   0    0.00    5.50
   9  -7   0   33.80    7.00
  -9  -7   0   23.10    9.30
   9  -7   0   14.90    6.40
   9  -7   0   25.20    9.10
  -9  -7   0   21.20    5.30
  -9   7   0   27.10    6.20
  -9   7   0   31.30   12.40
   9   7   0   26.90    7.20
   9   7   0   23.70    6.30
   9   7   0   19.00   12.30
  10  -7   0   -2.20    8.80
 -10  -7   0    4.60    5.90
  10  -7   0   -2.70    6.70
  10  -7   0   -1.90    7.10
 -10  -7   0   -1.30   10.10
 -10   7   0   -9.90    5.80
  10   7   0   -7.20   13.10
  10   7   0   -5.70    7.00
  10   7   0   -8.70    5.70
 -10   7   0   -5.00   10.90
 -11  -7   0   51.99    8.20
  11  -7   0   40.30    8.80
 -11  -7   0   55.99   11.90
  11  -7   0   42.10    9.20
  11  -7   0   60.69   12.90
  11   7   0   41.30    7.70
 -11   7   0   35.70   13.40
  11   7   0   36.40   15.40
 -11   7   0   45.30    9.60
  11   7   0   51.89   14.40
 -12  -7   0   88.39   14.70
  12  -7   0  109.79   15.60
  12  -7   0   84.89   14.40
  12  -7   0   75.19   10.40
 -12  -7   0   79.49   10.20
  12   7   0   77.49   11.60
 -12   7   0   87.79   10.90
  12   7   0   80.29   16.40
 -12   7   0   75.49   15.30
  12   7   0   74.59   12.60
  13  -7   0    5.80    9.60
  13  -7   0   16.10   12.60
  13  -7   0   12.80    8.20
 -13  -7   0   10.60    7.10
 -13  -7   0   28.80   13.00
 -13   7   0   26.20   14.90
 -13   7   0   13.90    8.20
  13   7   0   -6.60    6.80
  13   7   0    9.70   16.60
  13   7   0    9.70    8.90
 -14  -7   0    6.20    7.20
 -14  -7   0   18.20   11.20
  14  -7   0    1.40   11.30
  14  -7   0   -3.00    9.90
 -14   7   0   27.30   12.80
  14   7   0    2.00    8.70
  14   7   0   -6.20   14.60
 -14   7   0    8.10    7.50
  15  -7   0   81.49   13.60
 -15  -7   0  113.49   13.00
 -15  -7   0  128.29   18.60
  15  -7   0  107.99   17.40
 -15   7   0  104.29   13.50
  15   7   0   99.29   14.00
  15   7   0   74.49   20.80
  16  -7   0  -19.90   11.20
 -16  -7   0   -6.40    7.30
 -16  -7   0   28.40   12.80
  16   7   0    0.40    9.10
 -16   7   0   -0.50    7.50
   0  -8   0 2333.77   98.99
   0   8   0 2395.66   99.29
   0   8   0 2277.77   99.59
   0   8   0 2623.34  100.49
   1  -8   0    5.40    4.30
   1  -8   0   15.10    5.80
  -1  -8   0    7.10    4.40
  -1  -8   0    5.60    4.20
  -1   8   0   17.80    7.40
  -1   8   0    0.70    4.40
   1   8   0    4.30    4.60
   1   8   0   12.80    4.10
  -1   8   0   -3.40    4.30
  -2  -8   0   22.50    6.20
   2  -8   0   15.60    4.50
  -2  -8   0   21.00    5.10
   2  -8   0   27.70    6.60
   2   8   0    2.20    6.80
  -2   8   0   22.90    5.20
   2   8   0   14.50    4.70
  -2   8   0   14.20    4.50
   2   8   0   21.00    5.40
  -3  -8   0   -1.20    4.50
   3  -8   0   13.80    7.60
   3  -8   0    5.20    5.30
  -3  -8   0    0.80    5.30
  -3   8   0    3.90    4.60
   3   8   0    4.50    5.20
   3   8   0  -11.90    8.60
   3   8   0    1.60    4.80
  -3   8   0   -1.50    3.70
  -4  -8   0   86.19    8.40
  -4  -8   0   76.49    9.50
   4   8   0   77.49    7.90
   4   8   0   68.59   13.50
   4   8   0   89.09    8.40
  -4   8   0   87.19    8.80
  -4   8   0   79.59    6.60
  -5  -8   0  515.25   23.50
   5  -8   0  524.15   25.70
   5  -8   0  502.75   23.90
  -5  -8   0  497.65   25.00
  -5   8   0  495.35   23.60
   5   8   0  511.15   23.20
   5   8   0  504.65   23.90
   5   8   0  454.65   26.60
  -5   8   0  550.24   29.20
   6  -8   0  838.32   38.70
  -6  -8   0  822.42   37.10
   6  -8   0  877.61   37.70
  -6  -8   0  848.12   39.00
   6  -8   0  842.22   36.70
  -6   8   0  862.01   37.30
   6   8   0  851.41   37.50
  -6   8   0  834.12   41.70
   6   8   0  875.51   37.10
   6   8   0  826.72   41.00
   7  -8   0  424.96   19.80
  -7  -8   0  407.36   20.00
  -7  -8   0  383.86   22.30
   7  -8   0  402.66   22.00
   7  -8   0  415.06   20.60
  -7   8   0  412.96   20.20
   7   8   0  406.16   25.40
   7   8   0  424.16   20.10
   7   8   0  405.86   20.40
  -7   8   0  376.16   25.60
   8  -8   0  200.68   26.50
   8  -8   0  227.08   13.50
   8  -8   0  211.98   14.30
  -8  -8   0  211.28   16.50
  -8  -8   0  220.88   13.30
  -8   8   0  210.48   13.50
   8   8   0  207.98   20.50
   8   8   0  227.38   14.00
  -8   8   0  203.68   20.40
   8   8   0  235.18   13.90
   9  -8   0   90.29   14.90
   9  -8   0   89.89   10.40
  -9  -8   0   86.39    9.60
   9  -8   0   97.19   11.30
   9   8   0  101.19   19.80
  -9   8   0   84.49   10.20
   9   8   0   86.89   10.10
   9   8   0   74.59   10.00
  -9   8   0   65.99   21.80
  10  -8   0    0.30   10.60
  10  -8   0    1.60    6.50
 -10  -8   0    8.70    5.80
 -10  -8   0    1.70    9.30
  10  -8   0   -7.90    6.70
  10   8   0    7.80   13.60
  10   8   0    3.80    6.20
 -10   8   0    7.70    6.50
 -10   8   0   -1.60   12.90
  10   8   0    3.40    7.10
 -11  -8   0   31.40    8.40
  11  -8   0   35.70   12.70
  11  -8   0   26.20    8.30
 -11  -8   0   30.40   12.40
  11  -8   0   30.50    8.40
 -11   8   0   28.30   10.10
  11   8   0   22.30    7.20
 -11   8   0   30.60   14.60
  11   8   0   30.30   14.10
  12  -8   0   10.70    7.80
  12  -8   0   13.10   10.80
 -12  -8   0   21.70    6.90
 -12  -8   0   15.50   10.50
  12   8   0   -3.90   15.40
  12   8   0   12.90    8.60
 -12   8   0   20.00   14.70
  12   8   0   -3.00    6.80
 -12   8   0   12.70    7.90
  13  -8   0  219.38   22.10
  13  -8   0  231.48   18.80
 -13  -8   0  221.18   21.10
 -13  -8   0  229.98   16.20
  13  -8   0  212.88   17.30
 -13   8   0  230.98   16.90
  13   8   0  194.38   16.70
 -13   8   0  244.98   24.50
  13   8   0  197.88   29.20
  13   8   0  230.38   16.20
  14  -8   0  295.67   21.70
 -14  -8   0  309.67   24.70
  14  -8   0  273.27   22.70
 -14  -8   0  293.47   18.80
 -14   8   0  306.37   24.40
  14   8   0  270.77   19.50
  14   8   0  265.47   28.80
 -14   8   0  277.87   20.00
 -15  -8   0   -4.40    6.60
  15  -8   0   -8.10   12.90
 -15  -8   0   13.60   11.00
  15   8   0    8.90    9.20
 -15   8   0   40.60   14.50
  16  -8   0    0.30   11.80
 -16  -8   0   16.50    7.50
  16   8   0   27.40    9.70
 -16   8   0    4.20    7.90
   0  -9   0   -9.60    5.90
   0  -9   0   -3.10    4.70
   0   9   0  -10.80    5.10
   1  -9   0 3807.72  144.49
  -1  -9   0 3475.25  143.99
  -1  -9   0 3575.24  144.39
   1  -9   0 3369.96  143.89
  -1   9   0 3392.26  144.19
   1   9   0 3469.05  144.09
   1   9   0 3473.95  143.59
   1   9   0 3380.86  144.89
  -1   9   0 3697.03  145.39
  -1   9   0 3473.15  144.09
   2  -9   0 1854.71   79.09
   2  -9   0 2072.29   80.09
  -2  -9   0 1916.81   79.69
  -2  -9   0 1867.81   79.09
   2   9   0 1842.92   80.69
  -2   9   0 1818.42   78.99
  -2   9   0 1993.40   81.09
  -2   9   0 1898.61   79.29
   2   9   0 1910.21   78.69
   2   9   0 1871.31   79.39
   3  -9   0   42.50    6.20
  -3  -9   0   39.70    5.80
   3  -9   0   58.29   10.00
  -3  -9   0   41.50    7.40
  -3   9   0   37.30    5.00
  -3   9   0   36.30    6.10
   3   9   0   42.50    5.70
  -3   9   0   71.49   13.60
   3   9   0   40.90    6.50
   3   9   0   12.30   15.70
  -4  -9   0  296.07   16.50
   4  -9   0  331.27   18.00
  -4  -9   0  295.97   15.60
   4  -9   0  300.47   15.90
  -4   9   0  293.57   15.30
  -4   9   0  329.17   21.10
  -4   9   0  287.57   14.40
   4   9   0  301.37   15.20
   4   9   0  306.07   15.70
   4   9   0  281.47   18.90
  -5  -9   0  336.27   18.90
  -5  -9   0  347.07   17.50
   5  -9   0  365.26   19.90
   5   9   0  350.56   18.00
   5   9   0  334.27   21.90
  -5   9   0  356.36   23.30
  -5   9   0  343.27   16.10
   5   9   0  364.96   17.00
  -5   9   0  344.07   17.70
   6  -9   0    1.60    5.40
  -6  -9   0    8.10    6.80
   6  -9   0   15.00    7.00
  -6  -9   0    7.00    4.60
   6   9   0   10.60    4.80
  -6   9   0    4.70    4.70
   6   9   0    3.00    4.90
   6   9   0    6.60    8.30
  -6   9   0   14.10   11.10
   7  -9   0    2.00    5.40
  -7  -9   0    4.90    4.60
   7  -9   0   14.00    4.40
  -7  -9   0    5.60    6.40
   7  -9   0    6.30    7.60
  -7   9   0    4.80    4.50
  -7   9   0    4.90   11.30
   7   9   0    2.90    5.10
   7   9   0   13.10    5.40
   7   9   0    0.90    8.70
  -8  -9   0  133.39   10.40
   8  -9   0  142.79   10.60
   8  -9   0  147.39   12.30
   8  -9   0  149.99   15.60
  -8  -9   0  146.89   14.20
  -8   9   0  144.59   11.70
  -8   9   0  135.99   17.10
   8   9   0  147.49   11.90
   8   9   0  134.09   17.10
   8   9   0  156.08   11.00
   9  -9   0   27.20    7.70
   9  -9   0   37.30    6.50
  -9  -9   0   43.30   11.80
   9  -9   0   34.40   11.40
  -9  -9   0   31.80    6.90
   9   9   0   30.80    6.80
  -9   9   0   21.30   20.30
  -9   9   0   31.10    7.00
   9   9   0   30.10   13.40
   9   9   0   39.00    7.70
  10  -9   0   12.80    6.60
  10  -9   0    5.60    7.30
 -10  -9   0   18.50    6.70
  10  -9   0   22.50   11.80
 -10  -9   0   20.60   11.00
  10   9   0   20.90   14.60
 -10   9   0   18.80    7.10
  10   9   0   20.90    7.90
  10   9   0   14.70    6.90
 -10   9   0   16.10   13.60
 -11  -9   0  176.68   16.70
  11  -9   0  184.28   19.70
  11  -9   0  178.38   14.40
  11  -9   0  165.08   15.20
 -11  -9   0  165.38   18.30
  11   9   0  176.78   14.40
  11   9   0  186.78   23.20
 -11   9   0  187.88   13.90
 -11   9   0  167.38   22.20
 -12  -9   0  301.67   23.40
  12  -9   0  288.27   22.80
  12  -9   0  338.87   20.70
  12  -9   0  326.07   19.80
 -12  -9   0  313.97   19.20
  12   9   0  324.97   30.60
  12   9   0  288.67   19.30
 -12   9   0  317.27   26.90
 -12   9   0  327.67   19.80
  12   9   0  320.07   19.40
  13  -9   0   38.80   10.30
 -13  -9   0   45.10    8.90
 -13  -9   0   50.89   13.00
  13  -9   0   52.29   14.80
  13  -9   0   34.20    8.30
  13   9   0   42.70    9.60
 -13   9   0   47.60    9.40
 -13   9   0   46.60   15.60
  13   9   0   33.20   18.20
  13   9   0   38.40    7.70
  14  -9   0   52.79   13.60
  14  -9   0   68.49   10.50
 -14  -9   0   86.49   16.20
 -14  -9   0   48.20    8.80
  14   9   0   34.30   17.10
  14   9   0   82.39   12.20
 -14   9   0   53.89    9.90
 -15  -9   0   82.19   12.10
  15  -9   0   82.49   13.90
  15  -9   0   88.09   17.30
 -15   9   0   92.09   13.60
  15   9   0   96.89   12.80
  16  -9   0  -13.40   11.80
 -16  -9   0    0.20    7.10
 -16   9   0    0.20    7.80
  16   9   0    9.90    8.70
   0 -10   0 4670.43  198.78
   0 -10   0 5253.17  199.08
   0  10   0 4722.73  198.78
   0  10   0 4584.24  199.28
   0  10   0 5080.19  200.18
  -1 -10   0 1445.66   60.59
   1 -10   0 1571.64   60.89
   1 -10   0 1358.16   59.99
  -1 -10   0 1397.36   60.29
  -1  10   0 1445.56   60.49
   1  10   0 1372.06   61.49
  -1  10   0 1525.95   62.19
   1  10   0 1392.46   60.29
   1  10   0 1427.96   59.79
  -1  10   0 1381.06   60.59
   2 -10   0  496.15   22.70
  -2 -10   0  485.95   22.40
  -2 -10   0  512.05   23.20
   2 -10   0  536.45   24.10
   2  10   0  440.16   25.70
  -2  10   0  480.55   22.90
   2  10   0  482.55   22.10
  -2  10   0  441.96   22.50
  -2  10   0  509.65   25.20
   2  10   0  479.95   23.00
   3 -10   0 1040.70   43.10
   3 -10   0  964.40   41.90
  -3 -10   0  976.50   42.60
  -3 -10   0  948.11   41.80
   3  10   0  973.30   42.20
  -3  10   0 1005.90   44.80
   3  10   0  929.51   44.20
  -3  10   0  952.00   41.30
  -3  10   0  949.80   42.00
   3  10   0  960.60   41.20
  -4 -10   0  116.19   10.00
   4 -10   0  151.88   12.20
  -4 -10   0  111.99    9.10
   4 -10   0  125.09    9.70
   4  10   0  120.79    9.90
  -4  10   0  112.59    9.60
   4  10   0  113.39   12.90
  -4  10   0  127.09   16.30
   4  10   0  125.79    8.40
  -4  10   0  121.99    8.00
  -5 -10   0   31.60    6.80
  -5 -10   0   30.00    5.30
   5 -10   0   30.10    7.40
  -5  10   0   21.70    5.20
  -5  10   0   33.00   11.10
  -5  10   0   33.70    5.10
   5  10   0   34.60    5.40
   5  10   0   29.90    5.80
   5  10   0   31.30    9.20
   6 -10   0  264.37   17.00
   6 -10   0  255.67   14.70
  -6 -10   0  237.98   15.70
  -6 -10   0  225.28   13.60
   6  10   0  240.38   19.50
   6  10   0  233.58   14.20
  -6  10   0  241.78   14.10
   6  10   0  246.78   13.50
  -6  10   0  246.78   20.50
  -6  10   0  230.98   12.10
   7 -10   0  657.33   33.30
  -7 -10   0  646.74   30.70
  -7 -10   0  675.73   32.90
   7 -10   0  670.23   31.30
  -7  10   0  678.93   36.10
   7  10   0  656.23   31.10
   7  10   0  671.93   30.30
  -7  10   0  695.33   31.00
   7  10   0  675.13   35.80
   8 -10   0  181.58   11.70
   8 -10   0  181.38   17.40
   8 -10   0  196.48   14.00
  -8 -10   0  184.48   16.00
  -8 -10   0  174.38   12.90
   8  10   0  183.88   13.50
   8  10   0  172.48   21.00
  -8  10   0  201.68   13.50
   8  10   0  188.38   12.80
  -8  10   0  180.48   20.90
  -9 -10   0   -8.80    5.30
  -9 -10   0  -12.60    8.90
   9 -10   0   -5.40    6.80
   9 -10   0    0.20   10.70
   9 -10   0    2.60    4.90
  -9  10   0    3.20    5.80
   9  10   0   -4.20    6.20
   9  10   0   -6.10   11.30
   9  10   0   -1.10    6.50
  -9  10   0   -0.50   13.30
  10 -10   0  620.54   33.10
 -10 -10   0  595.34   28.90
  10 -10   0  596.64   29.40
 -10 -10   0  578.44   31.20
  10 -10   0  578.34   27.80
  10  10   0  599.34   29.00
 -10  10   0  560.64   35.10
  10  10   0  554.34   35.10
 -10  10   0  541.35   35.00
  10  10   0  582.74   28.90
  11 -10   0  170.48   19.50
  11 -10   0  135.19   15.60
 -11 -10   0  161.58   16.20
  11 -10   0  159.88   12.90
 -11 -10   0  145.29   13.50
  11  10   0  159.08   25.70
 -11  10   0  131.79   21.50
  11  10   0  131.79   13.70
 -11  10   0  152.58   14.60
 -12 -10   0    5.40    6.60
  12 -10   0   11.90    6.90
  12 -10   0   13.00    8.20
 -12 -10   0   26.50   11.70
  12 -10   0   12.90   11.80
  12  10   0   -5.10   14.40
 -12  10   0    9.80    7.90
  12  10   0    4.80    6.70
  12  10   0    6.90    8.20
 -12  10   0   32.40   14.70
  13 -10   0  285.67   24.30
  13 -10   0  282.37   20.90
 -13 -10   0  298.27   19.10
 -13 -10   0  333.57   23.60
  13 -10   0  255.27   22.70
  13  10   0  292.87   17.90
  13  10   0  272.47   31.70
  13  10   0  296.57   19.90
 -13  10   0  304.27   20.20
 -13  10   0  314.37   26.80
  14 -10   0   87.89   12.70
  14 -10   0   66.69   16.30
 -14 -10   0   80.99   12.20
 -14  10   0   94.89   13.50
  14  10   0   92.29   12.40
 -15 -10   0    2.00    7.50
  15  10   0   19.80    8.50
 -15  10   0    4.40    8.40
  16 -10   0   -4.50   13.80
 -16 -10   0   14.70    8.20
  16  10   0   32.30    9.60
 -16  10   0   20.60    8.60
   0 -11   0    4.60    5.60
   0 -11   0    8.10    4.20
   0  11   0    7.10    7.80
   0  11   0    4.30    4.90
   0  11   0   -5.90    5.60
  -1 -11   0  781.52   35.00
   1 -11   0  879.51   35.70
   1 -11   0  781.42   34.90
  -1  11   0  768.12   34.90
  -1  11   0  870.81   37.40
   1  11   0  778.12   35.00
  -1  11   0  760.52   35.20
   1  11   0  757.82   36.40
  -2 -11   0 1527.35   65.39
  -2 -11   0 1501.25   64.79
   2 -11   0 1514.05   64.79
   2 -11   0 1670.83   65.79
  -2  11   0 1581.34   66.79
  -2  11   0 1546.45   64.99
   2  11   0 1510.25   64.99
   2  11   0 1541.05   64.39
  -2  11   0 1540.85   65.09
   2  11   0 1494.45   66.59
   3 -11   0   87.49   10.20
  -3 -11   0   85.39    8.40
  -3 -11   0   77.29    8.00
   3 -11   0   80.49    8.40
   3  11   0   75.29   11.10
   3  11   0   82.59    6.80
   3  11   0   74.09    8.60
  -3  11   0   82.39   13.70
  -3  11   0   74.79    7.70
  -3  11   0   78.79    8.50
  -4 -11   0  629.24   28.80
   4 -11   0  644.04   29.00
  -4 -11   0  638.34   30.00
   4 -11   0  692.33   30.60
   4  11   0  623.94   32.10
  -4  11   0  632.44   33.00
  -4  11   0  612.04   27.90
   4  11   0  627.24   29.10
  -4  11   0  637.04   29.10
   4  11   0  635.24   28.10
   5 -11   0  638.84   29.50
  -5 -11   0  635.84   30.50
  -5 -11   0  628.24   29.20
   5 -11   0  679.13   31.40
   5  11   0  645.74   28.60
  -5  11   0  624.04   28.00
   5  11   0  631.24   32.90
  -5  11   0  656.23   29.50
   5  11   0  638.74   29.50
  -5  11   0  638.24   33.60
  -6 -11   0  105.39    9.60
   6 -11   0  111.19   13.50
  -6 -11   0  115.09   11.50
   6 -11   0  119.69   10.90
   6  11   0  116.79   10.50
   6  11   0  100.19   16.40
  -6  11   0  109.39    7.70
  -6  11   0  118.49   17.60
  -6  11   0  113.49   10.30
   6  11   0  114.19    9.40
  -7 -11   0   10.60    7.40
   7 -11   0    7.40    9.90
   7 -11   0    9.70    6.20
  -7 -11   0   11.50    4.90
  -7  11   0   16.60    5.80
   7  11   0    6.00    5.50
  -7  11   0   16.10    3.90
   7  11   0   -3.30    9.70
  -7  11   0   15.10   13.00
   7  11   0   10.60    6.20
  -8 -11   0  121.59   11.20
   8 -11   0  128.59   14.80
   8 -11   0  117.49   12.50
  -8 -11   0  127.69   14.30
  -8  11   0  150.28   12.30
   8  11   0  120.49   11.50
  -8  11   0  122.89   20.10
   8  11   0  131.89   10.90
   8  11   0  125.99   18.20
  -9 -11   0  464.15   27.00
   9 -11   0  439.66   26.80
  -9 -11   0  438.96   23.30
   9 -11   0  468.15   24.70
  -9  11   0  481.55   23.90
   9  11   0  471.75   24.30
   9  11   0  465.25   31.80
   9  11   0  467.45   23.60
  -9  11   0  473.45   30.90
 -10 -11   0   10.00   10.50
 -10 -11   0   15.80    8.60
  10 -11   0   19.90    5.60
  10 -11   0   15.30    8.30
  10 -11   0   17.00   10.90
  10  11   0   24.90    8.00
  10  11   0    2.30    7.10
 -10  11   0   14.50    8.20
 -10  11   0   14.30   14.00
  10  11   0   23.40   15.10
  11 -11   0   29.90   12.00
 -11 -11   0   17.70    7.00
 -11 -11   0   37.30   11.80
  11 -11   0   31.40    6.50
  11 -11   0   26.50    8.60
  11  11   0   43.30   14.90
 -11  11   0   40.60   14.70
  11  11   0   21.00   13.90
 -11  11   0   36.10    8.40
  11  11   0   35.00    8.00
  12 -11   0  121.39   11.60
  12 -11   0   85.99   13.00
  12 -11   0  116.19   19.40
 -12 -11   0  138.29   16.70
 -12 -11   0  132.39   13.30
 -12  11   0  137.59   18.70
  12  11   0  120.79   13.30
  12  11   0  109.59   13.10
 -12  11   0  136.89   14.30
  12  11   0   95.19   20.00
  13 -11   0    2.00    6.10
 -13 -11   0   -3.80    6.70
  13 -11   0   -4.60   11.30
  13  11   0   24.20    8.40
 -13  11   0   45.50   14.70
 -13  11   0   13.00    8.30
  13  11   0  -13.00   15.10
  14 -11   0   15.80   14.20
 -14 -11   0   30.50    9.80
 -14  11   0   53.99   15.00
  14  11   0   26.40    8.80
 -14  11   0    7.50    8.10
  15 -11   0   67.69   15.30
 -15  11   0   68.49   11.00
  15  11   0  134.39   13.70
   0 -12   0  505.15   24.30
   0 -12   0  568.24   24.80
   0  12   0  499.95   24.40
   0  12   0  473.25   25.10
   0  12   0  555.34   26.90
  -1 -12   0  487.55   23.50
   1 -12   0  487.05   23.50
   1 -12   0  572.94   24.60
   1  12   0  480.45   25.10
  -1  12   0  541.95   26.40
   1  12   0  478.85   23.80
  -1  12   0  487.75   24.20
  -1  12   0  496.85   23.90
   2 -12   0  271.17   14.50
  -2 -12   0  279.67   15.20
   2 -12   0  298.87   16.20
  -2 -12   0  283.07   14.90
   2  12   0  279.27   15.40
   2  12   0  274.47   14.10
  -2  12   0  275.77   18.60
   2  12   0  252.77   17.50
  -2  12   0  284.97   15.20
  -2  12   0  270.27   15.40
  -3 -12   0  480.35   23.50
   3 -12   0  531.25   24.90
  -3 -12   0  469.05   22.60
   3 -12   0  479.05   23.00
   3  12   0  482.75   26.00
   3  12   0  482.15   22.20
  -3  12   0  471.55   22.80
  -3  12   0  474.85   22.50
  -3  12   0  476.05   26.00
   3  12   0  484.45   23.30
   4 -12   0  415.96   20.50
  -4 -12   0  400.06   20.00
   4 -12   0  444.16   22.30
  -4 -12   0  407.36   20.90
  -4  12   0  389.76   20.10
  -4  12   0  401.76   24.50
   4  12   0  419.46   24.30
  -4  12   0  406.66   19.50
   4  12   0  418.56   20.60
   4  12   0  408.96   19.50
   5 -12   0  -10.20    5.40
  -5 -12   0   -4.50    5.50
   5 -12   0    1.50    8.00
  -5 -12   0   -5.30    4.60
  -5  12   0    0.00    3.60
  -5  12   0  -10.30   10.70
   5  12   0   -4.70    4.60
   5  12   0   -3.10    4.40
   5  12   0   -2.00    9.00
  -5  12   0    1.70    5.00
  -6 -12   0  268.07   15.30
   6 -12   0  274.77   19.70
  -6 -12   0  290.17   18.30
   6 -12   0  278.77   16.50
   6  12   0  269.97   22.10
   6  12   0  259.37   14.90
  -6  12   0  264.37   13.90
  -6  12   0  296.67   16.40
  -6  12   0  274.67   22.90
   6  12   0  277.97   16.30
   7 -12   0   48.00   10.30
  -7 -12   0   52.59    8.10
  -7 -12   0   55.49   11.30
   7 -12   0   49.00    8.00
   7  12   0   36.80   11.40
  -7  12   0   56.89    8.00
  -7  12   0   55.39    6.40
   7  12   0   40.80    7.30
  -7  12   0   65.39   14.90
   7  12   0   54.29    8.80
   8 -12   0   -6.90    6.90
   8 -12   0    4.80   10.90
  -8 -12   0   -6.70    5.70
   8  12   0   -3.20    6.30
   8  12   0   -9.50    5.70
  -8  12   0   -1.30    6.50
   8  12   0  -12.00   10.70
  -8  12   0    6.50    3.70
  -8  12   0    2.20   14.90
   9 -12   0   39.30   12.90
  -9 -12   0   23.80    6.70
   9 -12   0   24.70    8.20
  -9 -12   0   22.10   10.20
  -9  12   0   36.40   14.30
   9  12   0   22.00   14.40
  -9  12   0   20.20    4.40
   9  12   0   12.10    7.20
  -9  12   0   22.00    9.20
   9  12   0   21.10    7.30
  10 -12   0  202.68   16.20
 -10 -12   0  187.18   18.10
 -10 -12   0  166.08   15.00
  10 -12   0  195.28   20.50
  10  12   0  208.78   23.30
 -10  12   0  199.38   23.10
 -10  12   0  210.88   15.80
  10  12   0  207.78   14.30
  10  12   0  197.48   16.00
  11 -12   0   27.60   13.40
 -11 -12   0   16.20    7.10
 -11 -12   0   24.90   10.00
  11 -12   0   16.50    8.50
  11  12   0   28.80   16.60
 -11  12   0   17.90    7.90
 -11  12   0   32.10   13.90
  11  12   0   11.30    7.10
 -12 -12   0   23.20    7.80
  12 -12   0   14.00   12.00
 -12 -12   0   25.40   10.10
  12  12   0   16.90   15.30
  12  12   0   25.00    7.00
  12  12   0   28.00    8.40
 -12  12   0   19.10    8.30
 -12  12   0   38.50   14.50
  13 -12   0    9.20    6.60
  13 -12   0   12.70   14.10
 -13 -12   0   18.80    7.50
 -13  12   0   40.80   14.40
  13  12   0   16.70    7.90
 -13  12   0   10.00    7.80
 -14 -12   0   27.50   10.10
  14 -12   0    9.20   12.60
 -14 -12   0   19.50    8.00
 -14  12   0   12.70    8.70
 -14  12   0   41.90   14.20
  14  12   0   34.90    8.40
  15 -12   0   -1.20   14.80
   0 -13   0   10.10    4.90
   0 -13   0    4.30    5.90
   0  13   0    6.00    4.50
   0  13   0    2.10    7.90
   0  13   0    7.80    6.10
   1 -13   0   16.00    6.60
   1 -13   0   10.70    4.80
  -1 -13   0   10.50    4.80
  -1 -13   0   13.20    5.80
   1  13   0    9.00    5.40
  -1  13   0   20.20    5.40
  -1  13   0    8.80    8.50
  -1  13   0   11.80    6.00
   1  13   0   12.10    7.00
   1  13   0    5.80    8.10
  -2 -13   0   18.00    5.20
  -2 -13   0   18.20    4.60
   2 -13   0   12.60    4.90
   2 -13   0   23.30    7.20
   2  13   0   20.90    5.90
   2  13   0   10.40    7.60
  -2  13   0   16.80    5.30
  -2  13   0   15.60    5.60
  -2  13   0   12.20    9.30
   3 -13   0   25.80    8.00
  -3 -13   0   18.20    5.60
   3 -13   0   26.50    5.90
  -3 -13   0   22.00    5.20
  -3  13   0   25.80    5.50
   3  13   0   14.80    6.30
  -3  13   0   20.80    5.20
   3  13   0   23.10    5.20
   3  13   0   24.30    9.20
  -3  13   0   21.70   10.20
  -4 -13   0   40.50    6.30
   4 -13   0   48.60    7.10
   4 -13   0   47.00    9.30
  -4 -13   0   43.60    8.60
  -4  13   0   55.59    8.90
   4  13   0   46.80   10.70
   4  13   0   51.39    6.90
  -4  13   0   47.40   11.70
   4  13   0   46.40    7.00
  -4  13   0   61.59    7.80
  -5 -13   0   79.89   10.60
   5 -13   0   86.59   13.10
   5 -13   0   66.69   10.10
  -5 -13   0   73.59    9.10
  -5  13   0   97.59    8.30
  -5  13   0   71.99   14.50
  -5  13   0   82.49   10.00
   5  13   0   71.99    9.10
   5  13   0   73.69   13.90
   5  13   0   81.89    8.20
  -6 -13   0   34.10    7.90
  -6 -13   0   28.30    6.40
   6 -13   0   33.70   11.10
  -6  13   0   27.50   14.00
  -6  13   0   25.70    7.20
   6  13   0   32.00    6.30
   6  13   0   22.70    6.70
  -6  13   0   39.10    6.80
   6  13   0   28.30   11.80
   7 -13   0    4.70    7.10
   7 -13   0    2.70   10.00
  -7 -13   0   13.10    6.10
  -7 -13   0    5.20    7.70
   7  13   0    2.00    6.00
  -7  13   0    9.30    4.20
   7  13   0    9.70    5.70
  -7  13   0    8.60   14.40
  -7  13   0    5.80    6.70
   7  13   0    8.70   12.10
   8 -13   0  265.17   21.20
  -8 -13   0  252.37   16.30
   8 -13   0  246.98   17.40
  -8 -13   0  263.27   18.80
  -8  13   0  247.98   27.80
   8  13   0  239.68   16.70
   8  13   0  259.47   15.20
  -8  13   0  278.97   17.60
  -8  13   0  260.87   13.60
   8  13   0  258.67   23.00
   9 -13   0   81.79   13.10
  -9 -13   0  101.29   14.40
   9 -13   0   99.49   18.00
  -9 -13   0   80.69   11.90
   9  13   0  109.19   12.30
  -9  13   0  100.79   11.40
   9  13   0  108.69   11.20
   9  13   0   91.79   17.10
  -9  13   0  114.29    8.20
  -9  13   0  114.69   21.10
  10 -13   0   -5.20   10.70
  10 -13   0   -8.20    7.60
 -10 -13   0    5.50    9.40
 -10 -13   0    6.40    6.50
  10  13   0  -11.90    6.70
 -10  13   0   11.60    4.20
  10  13   0   11.70    7.00
 -10  13   0    3.60    7.80
  10  13   0  -16.00   12.60
 -10  13   0    3.60   13.50
  11 -13   0   -0.10   10.80
 -11 -13   0   12.90    9.90
  11 -13   0   -2.60    7.30
 -11 -13   0  -12.30    6.00
  11  13   0   -2.70   15.30
  11  13   0    2.30    6.90
 -11  13   0   -8.30    7.30
 -11  13   0    9.10   13.50
  11  13   0    8.50    8.90
 -12 -13   0  124.89   15.70
  12 -13   0   88.99   17.00
 -12 -13   0   87.29   11.90
 -12  13   0  115.99   20.20
  12  13   0   64.99   22.20
  12  13   0   89.49   13.70
  12  13   0  111.29   13.80
 -12  13   0  100.19   13.90
  13 -13   0   19.10   14.30
 -13 -13   0   37.60    8.40
 -13  13   0   26.00    9.10
  13  13   0   39.60    8.50
 -14 -13   0   27.00   11.20
  14 -13   0   16.20   15.40
 -14 -13   0   12.70    7.30
 -14  13   0    8.70    8.70
  14  13   0   41.30    8.90
   0 -14   0   50.49    7.40
   0 -14   0   66.59    9.60
   0  14   0   55.09    7.40
   0  14   0   72.39   13.80
   0  14   0   58.59   11.60
   1 -14   0   23.40    7.40
   1 -14   0   24.70    6.00
  -1 -14   0   23.50    6.80
  -1 -14   0   23.30    5.80
  -1  14   0   25.80    9.90
   1  14   0   25.90    9.20
  -1  14   0   27.50    6.40
   1  14   0   28.90    6.50
  -1  14   0   22.50    7.00
   1  14   0   23.10    8.00
   2 -14   0   11.90    5.70
   2 -14   0   16.40    7.80
  -2 -14   0   15.00    5.60
   2  14   0    7.30    5.90
  -2  14   0    7.40    9.90
  -2  14   0   14.80    6.10
  -2  14   0   11.40    5.60
   2  14   0    9.60    8.40
  -3 -14   0  170.58   12.10
   3 -14   0  187.58   14.50
  -3 -14   0  173.48   12.60
   3 -14   0  172.78   12.80
  -3  14   0  192.18   18.60
  -3  14   0  167.78   12.20
   3  14   0  170.68   11.00
  -3  14   0  181.68   12.80
   3  14   0  155.48   16.90
   3  14   0  174.38   12.90
   4 -14   0  442.86   22.00
  -4 -14   0  425.76   22.30
  -4 -14   0  426.96   21.50
   4 -14   0  450.75   24.00
  -4  14   0  411.26   26.50
  -4  14   0  427.86   21.00
   4  14   0  398.96   25.00
   4  14   0  431.56   22.10
  -4  14   0  425.56   22.10
   4  14   0  403.76   20.50
   5 -14   0   81.29   14.00
  -5 -14   0   59.49    9.40
   5 -14   0   60.89    8.40
  -5 -14   0   74.89   10.60
   5  14   0   66.49   12.80
   5  14   0   68.19    8.10
  -5  14   0   68.89   10.30
  -5  14   0   49.90   14.60
   5  14   0   48.70    7.80
  -5  14   0   70.79    8.70
   6 -14   0    9.50   10.20
  -6 -14   0    5.60    5.00
  -6 -14   0    3.20    7.30
  -6  14   0    7.20   13.60
   6  14   0    1.50    6.30
   6  14   0    3.40    5.50
  -6  14   0   10.70    4.80
   6  14   0    2.90   10.40
  -6  14   0    4.60    6.50
   7 -14   0   49.80    9.00
   7 -14   0   62.39   12.40
  -7 -14   0   44.90    7.80
  -7 -14   0   59.09   12.50
   7  14   0   36.60    7.70
  -7  14   0   75.99    7.70
  -7  14   0   60.19   15.60
  -7  14   0   66.39   11.00
   7  14   0   62.09    8.70
   7  14   0   48.20   14.10
   8 -14   0   26.70    8.40
  -8 -14   0   19.30    6.30
   8 -14   0   25.00   11.10
  -8 -14   0   37.20   10.00
   8  14   0   27.80   12.70
  -8  14   0   27.30   14.80
   8  14   0   38.60    7.10
   8  14   0   22.00    7.30
   9 -14   0    2.90    8.10
   9 -14   0    9.40   10.90
  -9 -14   0   15.10    9.30
  -9 -14   0    7.00    6.80
  -9  14   0   12.90   14.50
   9  14   0    5.70    6.70
   9  14   0   11.10   14.50
  -9  14   0   14.20    7.30
   9  14   0    5.80    6.60
 -10 -14   0   15.20    9.40
  10 -14   0   -2.80   10.70
 -10 -14   0   -1.00    5.90
  10  14   0   -9.60   13.00
 -10  14   0   11.60   14.60
  10  14   0    6.90    6.80
  10  14   0   18.80    7.30
 -10  14   0   -4.50    7.20
 -11 -14   0   18.70    9.80
 -11 -14   0    7.30    7.30
  11 -14   0   -4.60   12.40
  11 -14   0   -4.10    6.60
  11  14   0   13.20    8.60
 -11  14   0   31.40   14.30
 -11  14   0    6.50    7.90
  11  14   0    9.00    6.50
  11  14   0   15.10   14.70
  12 -14   0  110.69   18.40
 -12 -14   0  122.39   13.20
 -12  14   0  167.68   21.10
 -12  14   0  117.39   14.70
  12  14   0  149.09   13.20
 -13 -14   0   85.59   14.30
  13  14   0   67.59   11.60
 -13  14   0   49.60   14.70
 -14 -14   0    2.50    7.20
  14 -14   0    0.40   15.50
 -14  14   0   -9.00    8.20
   0 -15   0   -9.50    6.80
   0 -15   0   -5.00    5.50
   0  15   0   -0.80    9.90
   0  15   0   -1.30    7.40
   0  15   0   -2.80    5.80
  -1 -15   0  120.89   11.10
   1 -15   0  114.69   11.00
  -1 -15   0  122.69   11.20
   1 -15   0  132.89   12.70
   1  15   0  110.79   11.20
  -1  15   0  128.29   17.00
   1  15   0  123.79   15.20
  -1  15   0  114.99   12.90
  -1  15   0   99.39   11.30
   1  15   0  111.69   14.10
   2 -15   0   68.69   11.20
  -2 -15   0   61.99    9.30
   2 -15   0   62.59    9.40
  -2  15   0   69.99   12.90
   2  15   0   66.09    8.60
  -2  15   0   65.69   10.70
  -2  15   0   64.59   10.10
   2  15   0   73.39   14.10
  -3 -15   0  117.79   10.10
   3 -15   0  128.09   14.50
  -3 -15   0  112.79   10.80
   3 -15   0  116.09   11.50
   3  15   0  103.39   11.70
  -3  15   0  117.79   17.90
  -3  15   0  119.09   11.60
   3  15   0  118.59   16.70
  -3  15   0  122.79   11.80
  -4 -15   0   73.39   10.10
   4 -15   0   70.59   11.40
   4 -15   0   74.49   10.70
  -4 -15   0   72.39    8.80
  -4  15   0   64.09   14.70
   4  15   0   74.19    8.30
   4  15   0   93.09   16.80
   4  15   0   76.19   10.70
  -4  15   0  100.49   11.20
  -4  15   0   86.59   10.30
   5 -15   0    3.00    6.90
  -5 -15   0   16.00    6.80
  -5 -15   0   11.70    6.20
   5 -15   0    7.60    9.80
  -5  15   0   12.00    6.90
   5  15   0   14.50    7.00
  -5  15   0   -1.60   13.80
   5  15   0   18.50    5.80
  -5  15   0   23.30    5.80
   5  15   0   14.10   11.40
   6 -15   0   13.20   11.00
  -6 -15   0    1.10    6.30
  -6 -15   0    7.70    7.40
   6  15   0    6.80    7.00
  -6  15   0   -4.50   14.40
   6  15   0    7.70   12.40
   6  15   0   19.10    6.00
  -6  15   0    8.10    7.00
  -7 -15   0   -8.50    5.60
   7 -15   0  -12.90    7.10
   7 -15   0    3.50   10.40
  -7  15   0   -1.90    6.00
   7  15   0  -10.30    5.60
   7  15   0  -10.60    6.00
   7  15   0    7.70   11.50
   8 -15   0    6.50   11.70
   8 -15   0   -5.10    7.40
  -8 -15   0   11.80    8.50
   8  15   0    7.70    6.20
   8  15   0    2.00    7.00
  -8  15   0    7.60   15.10
  -8  15   0   18.30    7.90
   8  15   0   29.80   14.30
   9 -15   0   82.19   15.10
  -9 -15   0  105.79   14.00
   9 -15   0   84.69   13.10
  -9 -15   0   77.79   11.10
   9  15   0  109.29   10.40
  -9  15   0   84.39   11.20
   9  15   0   88.19   17.20
   9  15   0   97.99   11.70
  -9  15   0   73.79   17.10
  10 -15   0  -16.30   10.50
 -10 -15   0   -4.30    6.00
 -10 -15   0   -7.50    8.70
  10 -15   0   -5.50    6.90
  10  15   0    6.10   13.50
  10  15   0   -1.10    6.70
 -10  15   0   -6.80   13.20
 -10  15   0   -1.20    7.30
  10  15   0   14.70    6.70
  11 -15   0   46.70   15.10
 -11 -15   0   40.40    8.40
 -11  15   0   42.50    9.10
  11  15   0   61.19   10.80
  12 -15   0  -11.10   13.40
 -12  15   0    8.60    8.30
 -12  15   0   38.20   14.20
  12  15   0   25.40    7.20
 -13 -15   0    3.80    7.10
  13 -15   0  -12.00   12.00
 -13  15   0  -10.20    7.70
   0 -16   0  720.63   32.60
   0 -16   0  656.63   31.40
   0  16   0  653.73   31.90
   0  16   0  693.43   35.40
   0  16   0  621.14   32.90
  -1 -16   0  198.38   14.90
   1 -16   0  176.88   13.60
  -1 -16   0  182.08   13.60
   1 -16   0  193.18   15.40
  -1  16   0  183.78   15.10
  -1  16   0  169.58   19.10
   1  16   0  190.58   19.70
  -1  16   0  173.98   14.00
   1  16   0  186.98   18.30
   1  16   0  190.88   14.20
  -2 -16   0  150.28   13.50
   2 -16   0  168.48   12.90
   2 -16   0  160.58   15.20
  -2 -16   0  148.79   12.50
  -2  16   0  143.89   13.10
   2  16   0  157.48   13.30
   2  16   0  153.18   17.30
  -2  16   0  159.88   14.20
   2  16   0  175.68   19.00
  -2  16   0  123.69   19.80
   3 -16   0   72.69   11.60
  -3 -16   0   76.39   10.40
   3 -16   0   85.59   11.10
   3  16   0   86.69   16.70
  -3  16   0   67.69   14.90
  -3  16   0   83.09   10.00
   3  16   0   76.29   11.10
  -3  16   0   74.79   11.30
  -4 -16   0   12.10    6.70
  -4 -16   0   17.90    6.50
   4 -16   0    4.70    7.00
   4  16   0    9.60    5.60
  -4  16   0   21.50    7.20
  -4  16   0   17.80    7.20
   4  16   0   -1.00    6.70
   4  16   0   17.70   11.20
  -4  16   0    1.10   13.40
   5 -16   0  191.98   17.70
  -5 -16   0  180.08   13.60
   5 -16   0  161.68   14.50
  -5 -16   0  183.28   14.40
   5  16   0  187.38   12.10
   5  16   0  191.38   14.50
  -5  16   0  202.88   13.40
  -5  16   0  191.78   14.80
  -5  16   0  162.28   21.30
   5  16   0  177.18   19.10
   6 -16   0  112.19   16.60
  -6 -16   0  120.19   12.30
  -6 -16   0  123.29   12.00
   6  16   0  121.79   12.70
  -6  16   0  121.29   13.10
   6  16   0  122.99   10.40
  -6  16   0  103.89   22.80
  -6  16   0  154.28   11.20
   6  16   0  143.59   21.00
   7 -16   0   59.39    9.50
   7 -16   0   76.59   13.90
  -7 -16   0   62.19   10.10
  -7 -16   0   73.09   11.30
  -7  16   0   74.49   11.70
   7  16   0   73.89   15.50
   7  16   0   58.19    9.00
  -7  16   0   47.40   16.60
   7  16   0   72.69    8.80
   8 -16   0   36.10    8.80
  -8 -16   0   70.39    9.90
   8 -16   0   50.59   13.70
  -8 -16   0   54.89   11.80
   8  16   0   56.79    9.10
  -8  16   0   38.20    7.60
   8  16   0   43.40   15.00
  -8  16   0   35.00   16.40
  -9 -16   0   43.90   10.00
  -9 -16   0   23.90    6.90
   9 -16   0   13.30   13.30
   9 -16   0    8.90    8.20
   9  16   0   32.00    7.10
   9  16   0   26.20    7.30
   9  16   0   24.70   13.60
  -9  16   0   12.70   15.10
  -9  16   0   36.90    8.50
  10 -16   0   -6.00   11.80
 -10 -16   0    3.90    8.70
 -10 -16   0   12.40    6.80
  10  16   0   -5.10   16.10
  10  16   0   -6.90    5.90
  10  16   0   16.40    6.60
 -10  16   0   -2.90   14.00
 -10  16   0   -1.40    7.60
 -11 -16   0   13.40    9.00
  11 -16   0   -1.30   13.30
 -11 -16   0    3.50    6.70
 -11  16   0    9.60    8.40
 -11  16   0   35.90   14.10
 -12 -16   0   78.09   13.10
 -12  16   0   44.40   14.50
  12  16   0   59.49   10.00
  13 -16   0   18.30   15.40
 -13 -16   0   42.80    9.20
 -13  16   0   21.70    9.30
   0 -17   0    0.00    8.10
   0 -17   0   10.30    6.10
   0  17   0   15.30    9.20
   0  17   0    4.10    7.00
   0  17   0   -1.30   12.00
   1 -17   0  357.46   20.70
   1 -17   0  336.57   19.40
  -1 -17   0  329.37   19.10
  -1 -17   0  356.86   20.20
   1  17   0  320.17   19.60
   1  17   0  360.86   25.00
   1  17   0  329.67   22.60
  -1  17   0  331.47   24.60
  -1  17   0  315.87   19.50
  -1  17   0  310.17   21.00
  -2 -17   0  319.17   18.80
  -2 -17   0  306.67   18.20
   2 -17   0  297.97   18.50
   2 -17   0  314.17   20.70
   2  17   0  344.67   22.90
  -2  17   0  328.77   19.70
  -2  17   0  283.27   24.00
  -2  17   0  287.37   18.40
   2  17   0  306.77   22.60
   2  17   0  292.97   18.80
   3 -17   0   24.20    7.20
   3 -17   0   31.20   12.70
  -3 -17   0   32.20    7.10
  -3 -17   0   29.00    8.20
  -3  17   0   25.10    7.80
  -3  17   0   19.40   14.20
   3  17   0   23.00    7.60
   3  17   0   22.70   11.60
   4 -17   0  306.67   21.90
   4 -17   0  297.57   18.50
  -4 -17   0  284.27   17.70
  -4 -17   0  296.17   18.00
  -4  17   0  325.47   18.60
   4  17   0  310.47   18.80
  -4  17   0  302.97   18.60
   4  17   0  288.07   23.80
  -4  17   0  276.77   25.70
   5 -17   0  321.97   20.10
  -5 -17   0  327.87   19.90
   5 -17   0  358.76   22.90
  -5 -17   0  330.87   18.70
   5  17   0  349.27   20.30
   5  17   0  332.57   18.00
  -5  17   0  308.97   28.00
   5  17   0  334.07   26.30
  -5  17   0  348.37   20.40
  -5  17   0  377.96   19.60
   6 -17   0   20.10   11.30
  -6 -17   0   20.40    6.50
   6  17   0   15.40    6.20
   6  17   0   15.20   11.60
  -6  17   0    8.90    7.00
   6  17   0   16.30    7.40
  -6  17   0   -0.40   17.90
  -7 -17   0  105.19   14.20
  -7 -17   0  115.09   13.10
   7 -17   0   98.49   17.30
   7 -17   0   95.79   13.80
   7  17   0  116.79   12.60
   7  17   0  120.89   10.60
   7  17   0  117.49   19.20
  -7  17   0  124.79   13.00
   8 -17   0   42.60    9.20
  -8 -17   0   54.89    8.40
   8 -17   0   60.59   14.20
  -8 -17   0   62.19   11.00
   8  17   0   56.69    9.20
  -8  17   0   63.09   10.00
  -8  17   0   61.19   16.20
   8  17   0   70.29   16.50
  -9 -17   0    4.40    5.80
   9 -17   0  -10.20   12.40
  -9 -17   0   15.10    8.40
  -9  17   0   15.10   14.40
  -9  17   0    4.00    7.30
   9  17   0   17.80    6.30
   9  17   0   -0.30    6.50
   9  17   0   17.80   15.70
  10 -17   0   -7.40   13.20
 -10 -17   0    2.70    6.20
 -10  17   0    3.10   14.20
 -10  17   0   -4.00    7.30
  11 -17   0    4.70   11.90
 -11 -17   0   27.70    7.30
 -11  17   0   37.40   14.20
 -11  17   0   -1.30    7.70
 -12 -17   0   42.40    8.40
  12 -17   0   35.10   16.20
 -12  17   0   45.10   10.30
   0 -18   0   -2.90    8.30
   0 -18   0    0.70    6.40
   0  18   0  -17.50   11.40
   0  18   0   12.80    9.50
   0  18   0    0.90    6.60
   1 -18   0  121.79   12.70
   1 -18   0  129.09   15.50
  -1 -18   0  154.18   12.90
  -1 -18   0  143.79   14.20
  -1  18   0  124.09   20.10
   1  18   0  133.99   13.20
  -1  18   0  151.08   16.30
   1  18   0  159.58   18.60
  -1  18   0  149.29   13.20
   1  18   0  140.69   19.30
   2 -18   0    7.20    6.60
  -2 -18   0    4.90    7.90
  -2 -18   0    6.80    6.80
   2 -18   0   -9.70    8.90
   2  18   0   16.00   11.00
  -2  18   0    8.80    6.50
   2  18   0    3.30    7.00
  -2  18   0   -4.80   13.40
   2  18   0    4.30   11.50
   3 -18   0  167.98   16.30
  -3 -18   0  169.48   13.60
   3 -18   0  174.78   14.70
  -3 -18   0  182.58   14.30
   3  18   0  224.68   20.50
   3  18   0  182.38   19.70
   3  18   0  191.68   14.80
  -3  18   0  220.18   16.20
  -3  18   0  136.79   21.70
  -3  18   0  193.28   14.90
   4 -18   0   29.10   11.50
  -4 -18   0   41.00    7.70
   4 -18   0   39.20    8.00
   4  18   0   46.50   12.70
  -4  18   0   44.20    8.60
   4  18   0   26.50    8.00
  -4  18   0   11.70   15.00
   5 -18   0   23.80   11.40
   5 -18   0   26.80    8.20
  -5 -18   0   34.60    7.10
  -5 -18   0   29.80    7.60
  -5  18   0   33.60    9.80
   5  18   0   35.10   13.10
   5  18   0   27.60    7.90
  -5  18   0    0.50   15.50
   6 -18   0  144.99   17.70
  -6 -18   0  135.59   13.50
  -6  18   0  177.48   14.60
  -6  18   0  115.39   23.70
   6  18   0  155.88   13.80
   6  18   0  190.58   22.30
   6  18   0  158.78   11.90
   7 -18   0  110.19   13.60
  -7 -18   0  146.99   12.70
  -7 -18   0  138.09   13.80
   7 -18   0  137.69   18.20
   7  18   0  134.89   13.30
  -7  18   0  122.19   19.70
  -7  18   0  168.78   14.20
   7  18   0  154.38   11.50
   7  18   0  144.79   22.40
  -8 -18   0   13.60    7.40
   8 -18   0  -10.40   12.10
  -8 -18   0    6.30    6.50
   8 -18   0   -9.90    6.30
  -8  18   0  -12.80   14.90
  -8  18   0    4.50    7.20
   8  18   0   11.90    5.90
   8  18   0   12.40    6.60
   8  18   0   14.30   12.80
  -9 -18   0   23.00    6.70
  -9 -18   0   38.90    9.40
   9 -18   0   -1.30   12.30
  -9  18   0   23.30   16.10
  -9  18   0   20.00    8.40
 -10 -18   0   29.20    7.30
  10 -18   0    0.50   13.70
 -10  18   0   17.00    8.40
 -10  18   0   20.20   13.90
  11 -18   0    6.00   15.00
 -11  18   0   44.50   15.10
   0 -19   0    1.70    6.50
   0 -19   0   -8.00    8.70
   0  19   0    2.50    7.10
   0  19   0   15.30   10.30
   1 -19   0  225.38   15.60
  -1 -19   0  242.88   15.70
   1 -19   0  194.88   18.20
  -1 -19   0  228.58   16.50
   1  19   0  206.58   22.00
  -1  19   0  235.88   16.20
   1  19   0  236.18   21.20
   1  19   0  235.78   16.50
  -1  19   0  177.18   23.20
  -1  19   0  246.08   19.40
   2 -19   0  260.37   17.10
  -2 -19   0  255.37   17.40
   2 -19   0  222.78   20.40
  -2 -19   0  244.48   16.70
   2  19   0  244.08   21.10
  -2  19   0  196.88   24.90
   2  19   0  243.88   17.00
   2  19   0  268.07   23.00
  -2  19   0  278.27   20.10
  -2  19   0  260.27   17.10
  -3 -19   0    9.60    8.10
  -3 -19   0    9.70    6.40
   3 -19   0   -6.50   10.50
   3 -19   0   10.10    7.10
  -3  19   0    7.10    7.10
   3  19   0    9.40   11.50
   3  19   0   23.70   11.50
   3  19   0    5.40    7.00
   4 -19   0    2.40   11.10
  -4 -19   0   25.90    8.20
   4 -19   0   12.00    7.40
  -4 -19   0   15.60    6.00
   4  19   0   20.70   10.60
   4  19   0   14.10    7.50
  -4  19   0   13.80    7.40
  -4  19   0  -10.00   15.10
   5 -19   0   92.69   11.30
   5 -19   0  103.19   14.80
   5  19   0  132.79   20.70
   5  19   0  125.19   12.90
  -5  19   0  122.89   12.90
  -6 -19   0   50.29    8.10
  -6 -19   0   49.00   10.20
   6 -19   0   46.30   13.10
  -6  19   0   46.20    9.00
   6  19   0   65.09    9.60
   7 -19   0  -12.10   11.80
  -7 -19   0   23.30    6.70
  -7 -19   0   16.80    7.20
   7  19   0   19.50   14.00
  -7  19   0  -12.10   15.30
   7  19   0   22.00    7.40
  -7  19   0   22.20    7.50
   7  19   0   20.30    6.10
  -8 -19   0  118.29   13.00
  -8 -19   0  106.89   11.90
   8  19   0  123.79    9.60
  -8  19   0   85.09   13.10
  -9 -19   0  131.09   13.30
  -9 -19   0  115.69   12.00
   9 -19   0   60.59   16.70
  -9  19   0   70.59   18.00
   9  19   0  102.79   10.70
 -10 -19   0   32.40    7.50
  10 -19   0   -4.60   14.70
 -10  19   0   42.50   15.40
 -10  19   0   16.10    8.40
   0 -20   0  522.95   29.10
   0 -20   0  564.34   27.50
   0  20   0  483.55   27.40
   0  20   0  499.45   33.60
   0  20   0  553.84   31.00
   1 -20   0   36.50    7.50
  -1 -20   0   26.50   10.00
   1  20   0   21.10   14.30
   1  20   0   50.29   11.80
  -1  20   0   31.30    8.30
   1  20   0   25.00    8.10
   2 -20   0   94.79   16.10
  -2 -20   0  127.99   14.10
  -2 -20   0  138.79   12.90
   2 -20   0  137.29   13.70
   2  20   0  105.89   14.40
   2  20   0  146.49   20.30
   2  20   0  114.29   20.10
  -2  20   0  158.78   16.20
   3 -20   0  290.77   18.50
   3 -20   0  257.37   21.20
  -3 -20   0  296.97   18.30
  -3 -20   0  301.27   19.30
   3  20   0  302.07   23.70
   3  20   0  276.27   18.60
   3  20   0  289.47   23.80
  -3  20   0  285.17   18.80
  -3  20   0  238.68   25.90
   4 -20   0   72.29   13.40
  -4 -20   0   90.09   12.20
   4 -20   0   61.99    9.70
  -4  20   0   97.59   12.40
   4  20   0  104.59   13.40
   4  20   0  106.59   19.30
   4  20   0  118.59   20.60
   5 -20   0   -4.10   11.10
  -5 -20   0   25.30    8.10
  -5 -20   0   20.30    7.20
   5  20   0   35.20   12.60
   5  20   0   14.50    7.90
  -5  20   0   18.90    7.60
   6 -20   0   -8.50   11.50
  -6 -20   0    8.60    6.70
  -6 -20   0   27.90    6.80
   6  20   0   20.10    7.10
   6  20   0   21.00   13.40
  -6  20   0   14.10    7.70
  -7 -20   0   87.89   10.60
  -7 -20   0   67.59   11.00
  -7  20   0   81.89   12.60
   8 -20   0    1.30   13.20
  -8  20   0    9.70    8.40
  -8  20   0   28.30   17.40
   9 -20   0   24.80   15.50
  -9  20   0   38.10    9.10
  -9  20   0   48.40   18.10
   0 -21   0   22.90    7.20
   0  21   0   39.70   11.70
   0  21   0   24.20    7.90
   1 -21   0  108.89   15.00
  -1 -21   0  151.68   12.70
   1 -21   0  134.59   13.20
  -1 -21   0   99.39   14.80
   1  21   0   88.59   17.70
   1  21   0  132.89   13.70
   2 -21   0  186.98   19.20
  -2 -21   0  235.58   15.90
   2 -21   0  221.88   16.90
  -2 -21   0  204.18   17.70
  -2  21   0  215.28   16.60
   2  21   0  186.18   22.90
   2  21   0  259.87   21.70
   2  21   0  241.98   16.70
   3 -21   0   12.90    7.40
  -3 -21   0   55.79   12.50
  -3  21   0   29.60    8.10
   3  21   0   44.60   13.30
   3  21   0    9.40   13.40
   3  21   0   31.10    8.10
   4 -21   0   28.60    7.60
   4 -21   0   28.90   12.90
  -4 -21   0   61.59   10.10
   4  21   0   43.80    7.90
  -4  21   0   39.90    9.00
   5 -21   0   32.80   13.40
  -5  21   0   36.60    8.60
   5  21   0   64.19   14.60
   6 -21   0   19.90   12.80
  -6  21   0   23.20    8.40
   7 -21   0  -25.10   14.00
  -7  21   0  -25.40   16.00
  -7  21   0    9.40    7.50
   8 -21   0   26.00   14.90
  -8  21   0   39.20   17.50
  -8  21   0   44.70   10.20
   0  22   0   50.29    8.80
   1 -22   0   38.50    7.60
  -1 -22   0   68.99   10.80
  -1  22   0   32.40    7.80
   2 -22   0   22.20    6.80
   2  22   0   42.20   12.00
  -2  22   0   18.00    7.50
   2  22   0   27.90    8.90
  -3 -22   0  215.08   14.80
   3 -22   0  129.39   19.10
   3  22   0  176.38   14.60
  -3  22   0  160.48   15.10
   4 -22   0  107.09   16.70
  -4 -22   0  171.98   13.80
  -4  22   0  134.79   14.30
   4  22   0  156.98   13.00
   4  22   0  165.38   22.40
   4  22   0  167.88   24.80
  -5 -22   0   31.90    7.20
   5  22   0   39.30   13.10
   6 -22   0   -4.10   13.70
  -6  22   0   18.70    8.20
   0  23   0    5.90    6.90
  -1 -23   0   31.90    7.80
  -1  23   0   18.90    7.40
  -2  23   0   44.50    8.90
   2  23   0   27.90    7.00
   3 -23   0    0.20   12.50
  -3  23   0   37.90    8.20
   4 -23   0    1.20   13.10
 -17   0   1   51.49   14.30
  17   0  -1  -11.90   11.30
  16   0  -1  -11.00   11.10
 -16   0   1   28.30   13.50
 -15   0   1   -4.00    7.10
  15   0  -1   -5.40   10.90
 -15   0   1   24.30   13.80
  14   0  -1    6.00    9.80
 -14   0   1   15.20   12.10
  14   0  -1  -14.50   13.80
  14   0  -1   -3.80    7.80
 -14   0   1    4.70    7.10
 -13   0   1   10.20    6.90
  13   0  -1   -7.40   13.30
 -13   0   1   -2.20   11.80
  13   0  -1   -2.00    7.60
  13   0  -1    3.70   10.70
 -12   0   1   72.39   10.30
  12   0  -1   44.90   10.50
 -12   0   1   24.90   12.30
  11   0  -1    3.60    6.40
  11   0  -1    0.80   11.30
 -11   0   1    1.80    5.10
  11   0  -1   -7.10    8.00
  10   0  -1   -3.20   10.20
 -10   0   1    5.00    4.80
 -10   0   1  -18.80   12.50
  10   0  -1   -3.30    8.00
  10   0  -1   -5.60    5.50
  -9   0   1  -16.00    9.50
  -9   0   1    3.20    6.10
   9   0  -1   -9.20    4.80
   9   0  -1   -1.10    7.20
   9   0  -1   -0.20    9.50
   8   0  -1   -0.70    5.20
  -8   0   1   -0.80    4.00
   8   0  -1   11.40    8.80
   8   0  -1   -4.20    6.80
   7   0  -1    3.70    8.30
  -7   0   1    5.50    4.90
   7   0  -1    6.30    5.80
   6   0  -1   16.70    8.80
   6   0  -1   -1.10    6.80
  -6   0   1    4.50    3.90
   6   0  -1    8.50    5.10
   5   0  -1   -0.40    4.00
  -5   0   1    3.40    2.70
   5   0  -1    8.90    5.80
   5   0  -1    5.60    3.30
   4   0  -1    6.90    5.30
   4   0  -1   -2.10    4.10
   4   0  -1   -4.90    3.00
  -4   0   1   -3.20    2.30
   3   0  -1    4.50    3.20
   3   0  -1   -1.20    3.80
  -3   0   1    2.20    2.50
   2   0  -1    0.40    2.50
  -2   0   1   -3.20    3.80
   2   0  -1    3.60    2.90
  -2   0   1    0.20    1.20
   2   0  -1   -0.30    1.80
  -2   0  -1   -6.50    1.40
   2   0   1   -3.40    2.40
  -3   0  -1   -1.50    2.30
   3   0   1    0.30    3.60
   3   0   1   -8.40    4.40
   4   0   1   -3.30    3.50
  -4   0  -1   -1.40    2.30
  -5   0  -1   -1.60    2.50
   5   0   1   -1.50    5.30
   5   0   1    0.70    4.10
   5   0   1    0.30    3.20
  -6   0  -1    8.00    4.10
   6   0   1    3.10    7.10
   6   0   1    3.40    4.90
   6   0   1   11.10    8.70
  -7   0  -1    1.20    4.90
   7   0   1   25.60   10.20
   7   0   1    1.00    8.00
   7   0   1   -3.90    5.30
   8   0   1   30.10    9.50
   8   0   1    8.10    6.80
   8   0   1   12.70    5.40
  -8   0  -1   13.90    4.80
  -9   0  -1  -10.90    8.30
   9   0   1    6.10    9.30
   9   0   1   -9.90    4.80
  -9   0  -1   -2.50    4.40
   9   0   1   -2.80    6.20
  10   0   1    0.20    9.70
  10   0   1  -11.20    5.30
 -10   0  -1   -2.70    4.80
 -10   0  -1   -8.00   10.60
  10   0   1    3.80    7.20
 -11   0  -1    8.40   11.10
  11   0   1    8.00    8.50
  11   0   1    7.40    6.40
  11   0   1   23.10   11.90
 -11   0  -1   15.10    5.90
 -12   0  -1    7.20    6.60
 -12   0  -1   -7.70   12.90
  12   0   1    4.90   12.50
  12   0   1    8.50    9.00
  12   0   1   -4.90    6.50
  13   0   1   -5.10   13.30
 -13   0  -1    5.70    6.50
  13   0   1  -12.70    6.60
 -13   0  -1   -5.50   11.40
  13   0   1   11.10    9.80
  14   0   1  -17.00   18.70
 -14   0  -1   13.90   13.90
  14   0   1    3.40   10.80
 -14   0  -1   -0.90    6.50
 -15   0  -1   14.60   12.00
 -15   0  -1   -3.10    6.60
  15   0   1   10.10   11.10
  16   0   1  -19.20   10.60
 -16   0  -1  -10.70    6.40
 -17   0  -1   -8.30    6.60
  17   0   1    0.80   12.30
  17   1  -1   -2.70   11.70
  16  -1  -1    0.10   11.80
 -16  -1   1   -4.40    6.60
 -16   1   1  -10.40    6.30
  16   1  -1  -14.50   10.70
 -15  -1   1   30.10   13.90
 -15  -1   1   -8.10    6.90
  15  -1  -1   11.10   11.50
  15  -1  -1  -23.10   13.20
 -15   1   1   10.70   11.80
 -15   1   1   -1.30    6.60
  15   1  -1    0.20    9.40
  14  -1  -1   22.40   11.50
  14  -1  -1   -4.20   13.20
 -14  -1   1   18.90   12.30
 -14  -1   1   12.30    6.70
  14   1  -1    3.50   13.80
 -14   1   1   17.50   12.30
 -14   1   1    9.20    7.00
  14   1  -1   20.70   11.60
  13  -1  -1  -11.60   12.30
  13  -1  -1  -11.20    7.30
 -13  -1   1   -1.20    6.80
 -13  -1   1   -6.50   11.50
  13  -1  -1    1.80    9.70
  13   1  -1    6.20    9.40
  13   1  -1    3.50   13.90
 -13   1   1   -5.50   11.50
 -13   1   1    5.20    6.60
  12  -1  -1   21.20    8.00
  12  -1  -1   22.70    9.90
 -12  -1   1   20.90    6.30
  12  -1  -1   16.40   12.10
 -12  -1   1    6.60   13.10
  12   1  -1   12.60    7.80
 -12   1   1   15.30   12.30
 -12   1   1   27.60    6.90
  12   1  -1   24.30   14.00
  12   1  -1   25.00   10.60
  11  -1  -1  124.59   18.00
  11  -1  -1   93.39   12.30
 -11  -1   1   86.69   15.70
 -11  -1   1  113.29   10.60
  11  -1  -1  112.49   15.10
 -11   1   1  120.79   10.90
  11   1  -1   96.79   11.30
 -11   1   1   88.19   16.10
  11   1  -1  112.79   14.50
  11   1  -1  129.59   20.20
  10  -1  -1   42.50   10.80
  10  -1  -1   38.70    7.30
  10  -1  -1   38.40   15.80
 -10  -1   1   34.90    6.10
 -10  -1   1   32.80   13.50
  10   1  -1   19.00    6.30
 -10   1   1   42.00    6.30
  10   1  -1   36.70    8.30
  10   1  -1   36.50   12.10
 -10   1   1   16.60   13.10
   9  -1  -1   30.30    7.80
  -9  -1   1   24.10    9.50
   9  -1  -1   32.40    6.10
  -9  -1   1   30.50    6.30
   9  -1  -1   26.70   11.40
   9   1  -1   27.90   10.90
   9   1  -1   27.70    7.40
   9   1  -1   31.70    6.30
  -9   1   1   15.50   10.90
  -9   1   1   32.20    6.30
   8  -1  -1   38.60    6.20
   8  -1  -1   50.39    8.40
  -8  -1   1   47.20    7.50
  -8  -1   1   25.10   10.20
  -8   1   1   54.49    7.60
   8   1  -1   31.60    6.10
   8   1  -1   44.10    8.10
  -8   1   1   28.30   10.90
   7  -1  -1  198.68   12.20
  -7  -1   1  190.48   11.80
   7  -1  -1  191.78   15.30
   7   1  -1  187.98   13.00
   7   1  -1  196.78   15.20
  -7   1   1  186.58   11.90
   6  -1  -1   23.00    8.40
   6  -1  -1    7.50    5.30
   6  -1  -1    0.00    6.20
  -6  -1   1   -2.90    3.90
   6   1  -1   -2.20    6.10
  -6   1   1   -3.00    3.90
   6   1  -1   12.20    9.50
   6   1  -1   -1.10    5.00
  -5  -1   1  191.98    9.70
   5  -1  -1  196.58   10.30
  -5  -1   1  170.38   13.20
   5  -1  -1  172.38   10.80
   5  -1  -1  189.98   12.20
   5   1  -1  189.08   10.80
  -5   1   1  190.68   14.10
   5   1  -1  202.98   13.70
   5   1  -1  192.38   10.30
  -5   1   1  187.78    9.70
  -4  -1   1 1385.06   58.49
   4  -1  -1 1364.76   59.49
  -4  -1   1 1465.45   60.19
   4  -1  -1 1405.76   58.79
   4  -1  -1 1377.06   59.29
  -4   1   1 1439.76   60.49
  -4   1   1 1382.86   58.49
   4   1  -1 1460.75   59.29
   4   1  -1 1423.06   59.89
   4   1  -1 1485.45   58.79
  -3  -1   1  179.58   12.30
   3  -1  -1  202.18   10.30
   3  -1  -1  211.28   11.50
   3  -1  -1  217.48   11.80
  -3  -1   1  215.58    9.90
  -3   1   1  211.48    9.90
   3   1  -1  224.78   10.60
   3   1  -1  218.88   11.30
   3   1  -1  234.98   12.60
  -3   1   1  222.28   15.00
  -2  -1   1  120.89    6.20
   2  -1  -1  133.29    7.30
  -2  -1   1  110.59    7.60
   2  -1  -1  132.59    6.90
   2  -1  -1  128.99    6.40
   2   1  -1  134.99    8.70
   2   1  -1  130.89    6.80
  -2   1   1  127.19    6.20
   2  -1   1  243.98   10.90
  -2  -1  -1  209.98   11.60
  -2  -1  -1  241.48   10.20
   2  -1   1  243.98   10.90
   2   1   1  218.58   11.20
  -2   1  -1  225.18   12.20
   2   1   1  248.88   10.70
  -2   1  -1  221.88   10.10
  -3  -1  -1  759.92   33.30
   3  -1   1  798.12   32.70
  -3  -1  -1  753.82   31.90
   3  -1   1  767.12   32.60
   3   1   1  766.32   32.50
  -3   1  -1  745.63   31.90
  -3   1  -1  781.52   33.60
   3   1   1  752.42   33.00
   4  -1   1   79.99    8.10
  -4  -1  -1   79.09    5.20
   4  -1   1   90.09    7.30
  -4  -1  -1   72.89    7.40
   4   1   1   75.09    7.50
  -4   1  -1   81.29    4.90
  -4   1  -1   64.19    8.10
   4   1   1   75.29    6.70
  -5  -1  -1   76.89    5.80
   5  -1   1   92.39    9.50
   5  -1   1   77.39    8.10
  -5  -1  -1   66.59    8.50
   5  -1   1   76.89    6.50
   5   1   1   80.79    9.90
   5   1   1   83.69    6.40
   5   1   1   75.09    6.80
  -5   1  -1   78.99    5.80
  -5   1  -1   63.19    9.40
   6  -1   1  115.09   11.00
  -6  -1  -1  126.09    9.00
   6  -1   1  147.89   15.00
   6  -1   1  137.59   10.00
  -6   1  -1  127.09    9.10
   6   1   1  122.89   15.50
   6   1   1  134.09    9.90
   6   1   1  116.59   11.60
  -7  -1  -1  409.66   19.60
   7  -1   1  420.16   22.30
   7  -1   1  421.56   20.10
  -7  -1  -1  356.56   23.30
   7   1   1  396.36   21.50
   7   1   1  405.56   20.00
  -7   1  -1  353.46   23.90
  -7   1  -1  422.36   19.70
   7   1   1  458.15   25.20
   8  -1   1   93.49   15.20
   8  -1   1   52.99    8.70
  -8  -1  -1   53.09    7.60
   8  -1   1   59.79   10.10
   8   1   1  101.49   19.60
   8   1   1   64.99    9.70
   8   1   1   37.50    6.40
  -8   1  -1   67.89    7.80
   9  -1   1  208.18   15.10
  -9  -1  -1  194.68   11.70
  -9  -1  -1  179.78   16.30
   9  -1   1  206.18   12.90
   9  -1   1  200.68   21.90
   9   1   1  201.68   14.90
   9   1   1  201.58   13.20
   9   1   1  240.58   18.90
  -9   1  -1  174.78   16.50
  -9   1  -1  209.48   12.30
  10  -1   1   10.40   12.50
 -10  -1  -1   -7.70   10.30
  10  -1   1   12.30    5.90
  10  -1   1    9.30    9.40
 -10  -1  -1   12.30    5.30
  10   1   1    9.10    8.20
 -10   1  -1    9.50    5.20
  10   1   1    6.00    5.60
  10   1   1    6.70   10.30
 -10   1  -1    3.80   10.10
 -11  -1  -1  264.17   15.60
  11  -1   1  232.08   16.40
 -11  -1  -1  243.28   22.20
  11  -1   1  265.17   21.80
  11  -1   1  269.87   18.10
  11   1   1  266.47   23.30
 -11   1  -1  263.27   15.70
 -11   1  -1  259.67   22.80
  11   1   1  249.48   16.00
  11   1   1  245.88   17.50
 -12  -1  -1   24.40    7.40
 -12  -1  -1   -5.20   11.10
  12  -1   1   24.90   10.80
  12  -1   1   -0.80    6.80
  12  -1   1   14.30   12.00
  12   1   1    5.70   13.40
  12   1   1   23.70   10.20
 -12   1  -1   16.10    6.70
 -12   1  -1   -0.70   11.70
 -13  -1  -1   22.60    6.90
  13  -1   1   10.40    7.60
  13  -1   1   30.00   11.90
 -13  -1  -1   20.20   12.70
  13  -1   1    5.30   12.50
  13   1   1   27.30   11.50
 -13   1  -1   31.70    7.40
  13   1   1   12.70   13.80
 -13   1  -1   24.30   12.90
  14  -1   1   -6.60    6.60
 -14  -1  -1    3.60   13.10
  14  -1   1  -16.80   12.80
 -14  -1  -1   -1.90    6.80
  14  -1   1   -2.90   11.00
 -14   1  -1    0.50   11.40
  14   1   1    2.80   10.70
  14   1   1  -13.50   13.90
 -14   1  -1   -0.80    7.10
 -15  -1  -1   -7.00    6.90
  15  -1   1  -24.30   13.20
  15  -1   1   -2.60   11.80
 -15   1  -1    8.70   13.60
  15   1   1   -1.80    9.40
 -15   1  -1   -5.40    7.00
 -16  -1  -1  -14.30    6.60
  16  -1   1   -4.30   11.50
 -16   1  -1  -13.50    6.60
 -16   1  -1   21.40   11.80
  16   1   1  -11.70    9.40
 -17   1  -1    3.40    7.20
  17   1   1   -5.10   11.20
 -17  -2   1   -1.80    7.10
  17  -2  -1    4.80   12.80
 -17   2   1   -5.30    7.60
  17   2  -1   -9.00   10.80
  16  -2  -1   20.30   12.70
 -16  -2   1   13.10    7.60
  16   2  -1   13.90   10.00
  16   2  -1  -23.60   15.00
 -16   2   1   13.20    7.20
 -15  -2   1   30.10   13.50
 -15  -2   1   -4.60    6.30
  15  -2  -1    9.10   11.80
 -15   2   1   10.70   12.40
 -15   2   1   -1.20    7.20
  15   2  -1   -5.60   10.50
  14  -2  -1   54.39    9.40
  14  -2  -1   24.10   14.20
 -14  -2   1   69.39   11.30
  14  -2  -1   63.29   13.60
 -14  -2   1   88.99   16.50
 -14   2   1   74.79   11.60
 -14   2   1   93.99   17.20
  14   2  -1   56.29   16.80
  14   2  -1   58.39   12.40
  14   2  -1   48.90    9.40
  13  -2  -1  146.69   17.80
  13  -2  -1  151.98   20.50
 -13  -2   1  118.19   20.00
 -13  -2   1  147.29   13.00
  13  -2  -1  118.69   14.00
  13   2  -1  135.29   23.60
  13   2  -1  117.49   16.30
 -13   2   1  122.69   12.90
  13   2  -1   91.99   13.20
 -13   2   1  137.89   18.60
  12  -2  -1   17.60    9.90
  12  -2  -1   20.20   12.00
 -12  -2   1    3.90   11.60
  12  -2  -1    1.20    7.60
 -12  -2   1    7.60    6.30
  12   2  -1   23.60   10.30
 -12   2   1   17.50    6.90
  12   2  -1   25.30   14.60
 -12   2   1   22.60   12.30
  12   2  -1   16.30    7.80
  11  -2  -1    9.80    6.80
  11  -2  -1   14.50    9.00
  11  -2  -1    1.40   10.30
 -11  -2   1   -5.60   10.30
 -11  -2   1   12.20    5.90
  11   2  -1   17.80   13.40
 -11   2   1   13.60    5.90
  11   2  -1    5.00    6.50
 -11   2   1  -10.20   12.50
  11   2  -1   11.30    9.20
 -10  -2   1   35.50   14.10
  10  -2  -1   54.39    7.60
  10  -2  -1   51.09   11.20
 -10  -2   1   62.79    8.50
  10  -2  -1   73.29   14.10
 -10   2   1   44.50   12.10
 -10   2   1   67.19    8.60
  10   2  -1   45.60    7.20
  10   2  -1   58.59    9.80
  10   2  -1   54.79   12.90
   9  -2  -1  291.07   18.00
   9  -2  -1  302.47   20.70
  -9  -2   1  294.07   19.90
   9  -2  -1  315.77   17.00
  -9  -2   1  312.17   16.40
   9   2  -1  338.27   21.40
  -9   2   1  311.47   15.90
   9   2  -1  307.57   16.70
  -9   2   1  285.27   20.90
   9   2  -1  300.17   17.50
   8  -2  -1   15.40    8.50
  -8  -2   1    2.60    4.70
   8  -2  -1    8.60    7.20
   8  -2  -1   11.30    5.60
   8   2  -1    5.00    7.50
   8   2  -1    2.20    5.20
   8   2  -1   23.50   10.90
  -8   2   1   11.50    4.40
   7  -2  -1   50.49    7.20
  -7  -2   1   44.60    6.00
   7  -2  -1   45.20    8.90
  -7   2   1   56.79    8.10
   7   2  -1   53.39    9.10
   7   2  -1   57.99    9.50
  -6  -2   1  709.93   30.40
   6  -2  -1  724.83   33.00
   6  -2  -1  675.83   32.20
   6  -2  -1  712.73   31.00
  -6  -2   1  625.94   33.00
   6   2  -1  740.03   31.00
  -6   2   1  677.23   30.30
  -6   2   1  670.63   35.60
   6   2  -1  740.83   33.90
   6   2  -1  671.23   31.30
   5  -2  -1  597.54   27.70
   5  -2  -1  601.24   28.10
   5  -2  -1  640.84   27.10
  -5  -2   1  601.84   28.90
  -5  -2   1  600.94   26.70
   5   2  -1  630.04   27.70
   5   2  -1  652.63   29.60
  -5   2   1  596.84   26.60
  -5   2   1  657.43   30.50
   5   2  -1  616.94   26.90
   4  -2  -1  238.98   12.40
  -4  -2   1  235.78   11.20
   4  -2  -1  239.28   12.70
  -4  -2   1  224.18   12.90
   4  -2  -1  250.67   11.80
  -4   2   1  235.28   14.60
   4   2  -1  239.28   11.70
   4   2  -1  247.28   12.00
   4   2  -1  244.88   13.80
  -4   2   1  232.58   11.20
  -3  -2   1    0.90    2.30
   3  -2  -1    5.90    4.00
   3  -2  -1    5.00    3.20
   3  -2  -1    7.40    3.80
  -3   2   1    4.30    2.50
   3   2  -1    0.50    3.40
   3   2  -1    2.00    5.30
  -3   2   1    8.00    7.00
   3   2  -1    2.10    3.10
   2  -2  -1 1869.81   75.69
  -2  -2   1 1914.01   75.99
  -2  -2   1 1765.02   75.39
   2  -2  -1 1834.92   75.49
   2  -2  -1 1806.52   75.79
   2   2  -1 1910.21   75.59
  -2   2   1 1935.51   76.89
   2   2  -1 1844.52   75.49
   2   2  -1 1839.02   76.29
  -2   2   1 1748.33   75.29
   1  -2  -1    7.70    1.30
  -1  -2   1    9.90    1.60
   1   2  -1    8.00    1.40
  -1   2   1   12.00    2.00
   1   2  -1   10.80    1.90
   0  -2  -1    1.50    0.70
   0   2  -1    1.70    0.70
   2  -2   1  285.57   12.30
  -2  -2  -1  259.17   13.30
   2  -2   1  294.77   13.50
  -2  -2  -1  283.07   12.40
  -2   2  -1  273.67   12.40
   2   2   1  308.67   12.70
  -2   2  -1  305.97   15.10
   2   2   1  244.58   13.50
  -3  -2  -1  548.65   25.30
   3  -2   1  572.84   25.20
  -3  -2  -1  557.24   24.10
   3  -2   1  586.14   24.60
  -3   2  -1  545.85   24.50
   3   2   1  570.24   25.60
  -3   2  -1  596.84   26.20
  -3   2  -1  561.54   24.10
   3   2   1  604.64   24.70
   4  -2   1   35.60    5.90
   4  -2   1   39.90    5.40
   4  -2   1   42.70    6.90
  -4  -2  -1   37.70    3.90
  -4  -2  -1   31.90    6.10
  -4   2  -1   40.20    3.90
   4   2   1   26.30    5.10
   4   2   1   34.00    5.30
  -4   2  -1   24.00    5.90
   4   2   1   43.50    5.10
   5  -2   1  814.52   33.50
   5  -2   1  742.53   34.10
   5  -2   1  762.32   34.20
  -5  -2  -1  793.82   33.20
  -5  -2  -1  774.32   35.10
   5   2   1  767.22   33.90
  -5   2  -1  776.92   35.70
  -5   2  -1  751.32   33.10
   5   2   1  824.42   33.50
   5   2   1  796.22   35.10
   6  -2   1  359.66   18.70
   6  -2   1  359.86   17.40
  -6  -2  -1  347.97   16.70
   6   2   1  332.97   18.50
   6   2   1  328.57   20.60
  -6   2  -1  341.97   16.60
  -6   2  -1  293.97   21.30
   6   2   1  352.36   17.20
   7  -2   1  595.54   28.40
  -7  -2  -1  496.45   28.20
  -7  -2  -1  549.65   24.60
   7  -2   1  531.85   26.60
   7  -2   1  562.74   25.40
  -7   2  -1  547.55   24.80
   7   2   1  579.74   30.20
   7   2   1  546.75   25.50
   7   2   1  542.45   26.60
  -7   2  -1  473.35   30.30
   8  -2   1  568.64   26.20
   8  -2   1  548.45   27.50
   8  -2   1  585.84   29.10
  -8  -2  -1  535.75   29.10
  -8  -2  -1  559.54   25.80
  -8   2  -1  551.04   25.80
  -8   2  -1  519.75   30.70
   8   2   1  602.84   29.70
   8   2   1  557.14   27.30
   8   2   1  593.54   26.40
  -9  -2  -1   -9.60    9.00
   9  -2   1    2.20    7.90
   9  -2   1   -0.90    7.50
   9  -2   1   -4.90    5.00
  -9  -2  -1    0.30    4.50
   9   2   1    4.30    8.70
   9   2   1    0.30    5.00
   9   2   1   -1.00    7.00
  -9   2  -1    3.90    4.80
  10  -2   1  464.45   26.70
 -10  -2  -1  452.85   26.60
  10  -2   1  477.85   27.00
  10  -2   1  459.25   23.10
 -10  -2  -1  466.35   22.90
  10   2   1  455.05   24.10
 -10   2  -1  472.05   22.90
 -10   2  -1  453.05   29.00
  10   2   1  481.95   27.60
  10   2   1  468.95   23.00
  11  -2   1  297.57   22.40
 -11  -2  -1  246.38   20.60
  11  -2   1  264.87   19.60
 -11  -2  -1  277.07   16.20
  11  -2   1  246.38   16.70
  11   2   1  247.48   18.80
  11   2   1  262.27   16.40
 -11   2  -1  285.67   16.20
  11   2   1  283.47   24.40
 -11   2  -1  268.87   23.10
 -12  -2  -1    4.90    6.60
  12  -2   1   -8.50   11.50
  12  -2   1    1.30    9.10
 -12  -2  -1  -16.70   10.80
 -12   2  -1   -1.30   11.60
  12   2   1    8.50    9.40
  12   2   1    7.10   13.80
 -12   2  -1   -0.50    5.90
 -13  -2  -1  127.29   20.20
  13  -2   1  118.99   14.00
 -13  -2  -1  139.39   12.60
  13  -2   1  148.59   17.80
  13  -2   1  109.29   18.90
  13   2   1  114.19   16.00
  13   2   1  129.49   13.00
 -13   2  -1  101.19   18.10
 -13   2  -1  136.09   12.90
  13   2   1  117.19   22.70
 -14  -2  -1    1.90    7.10
  14  -2   1    2.50   11.30
  14  -2   1  -19.40   12.00
 -14  -2  -1   21.40   13.50
  14   2   1  -22.10   14.10
 -14   2  -1    5.00   11.90
 -14   2  -1   -5.10    6.50
  14   2   1    5.20    9.20
  15  -2   1   11.80   11.90
 -15  -2  -1   18.10   11.50
 -15   2  -1   17.60   11.80
  15   2   1   -7.40   10.40
  16  -2   1   -8.20   11.70
 -16   2  -1   38.90   14.30
  16   2   1   -9.10   10.50
  17  -2   1   15.90   11.60
 -17  -2  -1    8.40    7.30
 -17   2  -1   15.70    8.10
  17   2   1   31.70   11.00
  17  -3  -1    3.60   12.10
 -17   3   1    7.60    8.20
  16  -3  -1   -3.10   11.90
 -16  -3   1   -7.50    6.60
 -16   3   1   31.90   12.40
 -16   3   1  -10.60    6.40
  16   3  -1   -6.90   10.10
 -15  -3   1  -10.70    6.70
  15  -3  -1   -2.70   11.60
 -15  -3   1   25.20   11.80
 -15   3   1   -6.40    7.00
  15   3  -1    1.50    9.90
 -15   3   1   18.20   14.20
  14  -3  -1    1.20    8.10
 -14  -3   1   18.80    7.60
 -14  -3   1   30.00   13.90
  14  -3  -1   12.80   12.10
  14  -3  -1   23.80   12.20
 -14   3   1   16.60    7.40
  14   3  -1   26.00    8.30
  14   3  -1   30.00   10.00
  14   3  -1   14.30   15.70
 -14   3   1   23.70   14.60
  13  -3  -1   47.10   13.30
 -13  -3   1   63.39    9.00
  13  -3  -1   62.19   13.30
  13  -3  -1   51.99    9.70
 -13  -3   1   51.49   13.70
  13   3  -1   41.90    8.80
 -13   3   1   63.19    9.20
 -13   3   1   68.19   14.80
  13   3  -1   58.79   11.60
  13   3  -1   58.99   17.00
 -12  -3   1   -2.30    6.10
 -12  -3   1   -0.20   11.30
  12  -3  -1   -0.90   10.60
  12  -3  -1   -8.10    6.90
  12  -3  -1   -3.00   11.00
  12   3  -1    3.70   12.90
  12   3  -1    9.80    8.70
  12   3  -1  -13.80    6.60
 -12   3   1    2.40    6.00
 -12   3   1   -1.20   12.00
  11  -3  -1    1.10    9.90
  11  -3  -1   -2.80    9.60
 -11  -3   1  -15.30   11.00
 -11  -3   1   -1.70    4.90
  11  -3  -1   -6.60    6.80
  11   3  -1    0.50    6.30
  11   3  -1   -1.10    7.70
  11   3  -1    6.60   13.10
 -11   3   1  -11.30   12.40
 -11   3   1    1.10    5.60
  10  -3  -1  369.06   19.60
  10  -3  -1  368.66   22.90
 -10  -3   1  359.26   18.70
 -10  -3   1  316.67   24.30
  10  -3  -1  368.96   21.80
  10   3  -1  347.17   19.30
 -10   3   1  370.46   18.90
  10   3  -1  383.36   26.50
 -10   3   1  356.36   23.90
  10   3  -1  347.77   20.80
  -9  -3   1   -1.70    9.40
   9  -3  -1   12.40    7.20
   9  -3  -1   11.50    8.00
   9  -3  -1   20.70    6.00
  -9  -3   1   11.00    4.90
  -9   3   1    6.50    4.40
   9   3  -1   12.50    9.70
   9   3  -1    8.50    7.00
  -9   3   1   -4.60    9.40
   9   3  -1    7.50    5.30
   8  -3  -1 1122.49   49.50
  -8  -3   1 1073.29   50.09
  -8  -3   1 1068.49   47.30
   8  -3  -1 1122.49   47.90
   8  -3  -1 1060.09   48.90
   8   3  -1 1107.29   47.80
  -8   3   1 1115.29   47.50
  -8   3   1 1073.89   51.09
   8   3  -1 1183.18   51.89
   8   3  -1 1120.89   48.70
   7  -3  -1 1228.38   51.39
   7  -3  -1 1213.58   52.79
   7  -3  -1 1188.58   52.79
  -7  -3   1 1153.18   53.99
  -7  -3   1 1184.28   50.89
  -7   3   1 1181.48   54.89
  -7   3   1 1207.08   50.99
   7   3  -1 1258.47   52.29
   7   3  -1 1174.68   51.29
   6  -3  -1  132.89   11.90
   6  -3  -1  154.08   11.20
  -6  -3   1  123.69    9.40
   6  -3  -1  148.59   12.30
   6   3  -1  115.19   11.90
   6   3  -1  119.99   16.00
  -6   3   1  121.79    9.60
  -6   3   1   92.39   16.90
   6   3  -1  132.69   10.60
   5  -3  -1 1220.98   54.49
   5  -3  -1 1252.17   54.39
   5  -3  -1 1294.37   53.99
  -5  -3   1 1259.47   53.59
  -5  -3   1 1253.47   55.19
   5   3  -1 1333.27   53.99
   5   3  -1 1329.37   56.19
   5   3  -1 1348.67   54.39
  -5   3   1 1306.77   56.59
  -5   3   1 1262.67   53.59
   4  -3  -1    7.20    3.10
   4  -3  -1    1.40    3.40
  -4  -3   1    4.90    2.40
   4  -3  -1    2.70    4.20
  -4   3   1    1.80    6.30
   4   3  -1   -6.90    4.70
   4   3  -1    2.60    3.00
  -4   3   1    4.60    2.40
   4   3  -1    2.30    3.50
  -3  -3   1 6116.49  254.67
   3  -3  -1 6459.55  254.07
  -3  -3   1 5964.30  253.87
   3  -3  -1 6299.77  254.27
   3  -3  -1 6020.30  254.47
   3   3  -1 6264.77  254.07
   3   3  -1 6288.47  255.17
  -3   3   1 6449.95  255.67
   3   3  -1 6626.14  254.17
  -3   3   1 6063.69  253.87
   2  -3  -1  981.50   39.20
  -2  -3   1  937.11   38.80
   2  -3  -1  918.61   39.20
   2  -3  -1  943.31   38.90
  -2  -3   1  912.71   39.20
   2   3  -1  905.21   39.90
   2   3  -1  932.71   39.00
  -2   3   1  919.71   39.10
  -2   3   1  960.60   40.30
  -2   3   1  897.41   38.70
   2   3  -1  981.50   38.90
  -1  -3   1 3939.91  163.48
   1  -3  -1 3863.11  163.48
   1  -3  -1 3983.10  163.58
  -1  -3   1 4129.99  163.48
  -1   3   1 4000.60  164.18
   1   3  -1 4040.80  164.08
   1   3  -1 4115.79  163.58
  -1   3   1 3917.51  163.48
   1   3  -1 4240.58  163.58
   0  -3   1  439.96   19.10
   0  -3  -1  467.35   19.30
   0  -3  -1  436.86   18.90
   0   3  -1  451.85   19.00
   0   3   1  450.25   19.10
   0   3  -1  451.95   19.00
   1  -3   1  632.94   27.20
  -1  -3  -1  654.43   27.60
  -1  -3  -1  623.74   27.90
   1  -3   1  695.33   28.10
  -1   3  -1  637.74   27.50
   1   3   1  638.14   28.20
  -1   3  -1  746.53   28.50
  -2  -3  -1 1457.85   61.89
  -2  -3  -1 1455.85   61.19
   2  -3   1 1529.25   60.99
   2  -3   1 1499.65   61.89
  -2   3  -1 1388.86   60.89
   2   3   1 1444.86   62.19
   2   3   1 1591.74   61.19
  -2   3  -1 1449.06   61.19
  -2   3  -1 1630.74   62.79
  -3  -3  -1  229.68   10.90
   3  -3   1  231.48   12.30
   3  -3   1  246.88   11.00
  -3  -3  -1  232.68   12.50
  -3   3  -1  235.68   14.20
  -3   3  -1  235.28   10.90
   3   3   1  259.57   11.30
   3   3   1  241.88   11.50
   3   3   1  224.38   13.30
  -3   3  -1  213.38   11.10
   4  -3   1   20.20    4.80
  -4  -3  -1   14.50    2.70
   4  -3   1   13.60    3.30
   4  -3   1   13.70    3.30
  -4   3  -1    7.20    5.70
  -4   3  -1   12.50    2.60
   4   3   1   13.30    2.90
   4   3   1    9.00    4.70
   4   3   1   11.50    3.60
  -5  -3  -1 1439.66   60.89
   5  -3   1 1435.86   61.99
   5  -3   1 1409.66   61.39
  -5  -3  -1 1463.35   62.89
   5  -3   1 1479.85   61.19
   5   3   1 1461.55   61.39
  -5   3  -1 1502.85   63.39
  -5   3  -1 1430.56   60.89
   5   3   1 1518.25   61.19
   5   3   1 1532.75   63.19
  -6  -3  -1 1881.01   81.79
   6  -3   1 1894.71   80.99
   6  -3   1 1914.81   80.49
  -6  -3  -1 1841.62   79.59
   6  -3   1 1988.50   79.99
   6   3   1 1923.01   82.09
   6   3   1 2034.90   80.09
  -6   3  -1 1931.71   83.09
  -6   3  -1 1882.61   79.59
   6   3   1 1915.31   80.39
  -7  -3  -1  633.24   28.10
   7  -3   1  653.93   30.20
  -7  -3  -1  581.64   30.90
   7  -3   1  608.64   29.90
   7  -3   1  653.93   28.60
   7   3   1  550.74   43.00
  -7   3  -1  582.94   32.40
   7   3   1  612.44   28.90
   7   3   1  702.63   28.80
  -7   3  -1  640.54   28.20
   8  -3   1  224.48   12.90
   8  -3   1  208.08   15.50
   8  -3   1  204.18   14.50
  -8  -3  -1  206.78   12.10
  -8  -3  -1  167.68   15.40
  -8   3  -1  200.18   12.10
   8   3   1  213.38   12.70
   8   3   1  204.68   14.00
  -8   3  -1  164.28   17.00
   8   3   1  213.88   17.50
  -9  -3  -1  637.84   29.70
   9  -3   1  649.64   32.20
   9  -3   1  673.33   30.20
   9  -3   1  639.34   31.60
  -9  -3  -1  628.14   32.80
   9   3   1  729.43   35.10
  -9   3  -1  625.64   33.60
  -9   3  -1  655.93   29.80
   9   3   1  681.93   30.10
   9   3   1  628.04   30.50
 -10  -3  -1   23.10   10.10
  10  -3   1   23.10    6.50
 -10  -3  -1   28.90    5.90
  10  -3   1   26.00    8.70
  10   3   1   42.20   12.20
 -10   3  -1   27.00    5.60
  10   3   1   26.10    8.10
  10   3   1   26.40    6.20
 -10   3  -1   17.80   10.80
 -11  -3  -1  161.28   12.70
  11  -3   1  174.58   17.10
  11  -3   1  166.48   18.40
 -11  -3  -1  165.08   17.50
  11  -3   1  148.99   13.30
 -11   3  -1  159.78   18.30
 -11   3  -1  174.98   13.00
  11   3   1  171.18   14.10
  11   3   1  205.48   20.30
  11   3   1  164.78   13.40
  12  -3   1  531.65   29.50
  12  -3   1  531.95   27.60
 -12  -3  -1  529.05   31.40
 -12  -3  -1  542.45   27.00
  12  -3   1  559.14   31.70
 -12   3  -1  532.85   27.10
 -12   3  -1  543.15   33.70
  12   3   1  565.64   38.90
  12   3   1  531.15   27.30
  12   3   1  550.64   29.10
  13  -3   1  117.39   13.30
 -13  -3  -1  130.19   17.30
  13  -3   1  134.29   16.00
  13  -3   1  118.79   19.80
 -13  -3  -1  134.19   12.60
  13   3   1  133.99   16.40
  13   3   1  148.59   24.40
  13   3   1  120.19   13.20
 -13   3  -1  130.69   12.80
 -13   3  -1  139.99   21.10
 -14  -3  -1   20.70   11.80
  14  -3   1   19.50   12.10
  14  -3   1   -7.00   12.00
 -14  -3  -1    5.20    7.10
  14   3   1    5.60   10.10
 -14   3  -1   22.40   14.20
  14   3   1  -10.70   15.10
 -14   3  -1    6.70    7.20
  14   3   1   -6.70    6.20
 -15  -3  -1    5.20    7.50
 -15  -3  -1   27.10   11.50
  15  -3   1    3.00   11.70
 -15   3  -1    9.00    7.70
  15   3   1   -5.40   10.30
 -15   3  -1   10.30   12.20
  15   3   1  -16.80   14.10
  16  -3   1   -1.00   10.90
 -16  -3  -1    0.60    7.20
  16   3   1    3.00   10.10
  16   3   1  -21.30   15.30
 -16   3  -1    2.20    6.90
  17  -3   1   -0.90   12.90
  17   3   1   10.10   11.00
  17   4  -1    5.80   10.60
  16  -4  -1  -12.00   11.10
 -16  -4   1   -0.30    6.50
  16   4  -1   10.50   10.30
  16   4  -1  -10.50   16.80
 -16   4   1    7.30    7.60
 -15  -4   1   -4.40    6.20
  15  -4  -1   -5.10   10.40
 -15  -4   1   13.70   11.10
 -15   4   1   14.40   12.20
 -15   4   1   -3.20    7.10
  15   4  -1   -3.30    8.40
  14  -4  -1   -0.10   11.80
 -14  -4   1    7.20   12.60
  14  -4  -1    2.80   10.50
 -14  -4   1    0.30    6.70
  14  -4  -1  -13.10    7.70
  14   4  -1   -9.20    7.40
  14   4  -1  -17.00   15.60
 -14   4   1   12.20    6.90
  14   4  -1   -8.60    8.30
 -14   4   1   17.90   12.70
  13  -4  -1  282.57   21.20
 -13  -4   1  302.57   18.20
  13  -4  -1  289.67   19.10
  13  -4  -1  289.67   24.10
 -13  -4   1  272.47   24.30
  13   4  -1  268.97   19.30
 -13   4   1  289.47   26.40
 -13   4   1  315.77   18.60
  13   4  -1  268.37   18.80
  13   4  -1  305.57   29.80
  12  -4  -1   73.39   12.30
  12  -4  -1   58.09   12.20
 -12  -4   1   82.59   17.90
 -12  -4   1   87.89   11.00
  12  -4  -1   93.29   16.20
  12   4  -1   80.49   16.70
  12   4  -1   78.89   13.90
 -12   4   1   81.39   11.30
  12   4  -1   75.49   11.90
 -12   4   1   83.29   17.60
  11  -4  -1  401.76   23.70
  11  -4  -1  400.06   21.40
 -11  -4   1  380.66   20.30
 -11  -4   1  350.96   25.50
  11  -4  -1  390.46   23.90
  11   4  -1  407.06   29.50
  11   4  -1  364.96   21.10
  11   4  -1  340.37   21.90
 -11   4   1  404.56   20.80
 -11   4   1  370.06   27.60
 -10  -4   1   30.40    6.30
  10  -4  -1   38.00    9.20
  10  -4  -1   27.70    6.80
 -10  -4   1   33.40   10.40
 -10   4   1   32.90    5.90
  10   4  -1   36.90    8.90
 -10   4   1   34.20   11.40
  10   4  -1   36.50   12.00
  10   4  -1   25.70    6.90
   9  -4  -1  381.76   21.20
  -9  -4   1  337.87   21.50
   9  -4  -1  354.96   19.00
  -9  -4   1  366.96   18.40
   9  -4  -1  332.97   20.30
  -9   4   1  352.96   23.20
   9   4  -1  355.36   20.00
   9   4  -1  399.06   25.70
   9   4  -1  357.66   19.00
  -9   4   1  369.96   18.50
  -8  -4   1    8.30    4.30
   8  -4  -1   19.00    7.60
   8  -4  -1   12.80    5.90
  -8  -4   1    2.90    8.10
   8  -4  -1   13.50    7.10
   8   4  -1   10.60    5.80
   8   4  -1   14.50    9.80
  -8   4   1   -0.80   11.20
  -8   4   1   16.40    5.20
   8   4  -1   22.60    7.20
   7  -4  -1  698.63   31.90
  -7  -4   1  599.34   32.50
   7  -4  -1  714.73   31.00
   7  -4  -1  679.93   32.50
  -7  -4   1  690.73   30.20
  -7   4   1  676.83   30.20
   7   4  -1  694.23   30.80
   7   4  -1  714.13   34.80
  -7   4   1  620.34   34.80
   7   4  -1  667.43   31.30
   6  -4  -1 1772.32   75.09
  -6  -4   1 1713.63   73.39
   6  -4  -1 1783.82   74.49
   6  -4  -1 1775.22   73.89
  -6  -4   1 1687.53   75.69
   6   4  -1 1802.22   76.59
   6   4  -1 1771.32   73.89
  -6   4   1 1809.42   77.99
  -6   4   1 1754.92   73.49
   6   4  -1 1778.92   74.19
   5  -4  -1    0.70    4.70
   5  -4  -1    6.20    5.90
   5  -4  -1    6.00    5.20
  -5  -4   1    1.70    3.50
   5   4  -1  -11.30    7.40
   5   4  -1   -1.20    4.50
  -5   4   1    9.30    9.80
  -5   4   1    3.50    3.70
   5   4  -1   -1.00    5.10
   4  -4  -1   75.39    6.80
   4  -4  -1   76.09    6.70
  -4  -4   1   59.19    7.30
  -4  -4   1   65.19    4.90
   4  -4  -1   71.79    6.40
   4   4  -1   70.69    6.30
  -4   4   1   67.79    5.10
  -4   4   1   83.89   12.00
   4   4  -1   59.19    8.50
   4   4  -1   71.29    6.30
  -3  -4   1 2520.05  105.29
   3  -4  -1 2448.16  105.09
  -3  -4   1 2548.05  104.59
   3  -4  -1 2641.14  104.89
   3   4  -1 2569.94  105.89
   3   4  -1 2659.83  104.89
  -3   4   1 2515.05  106.19
   3   4  -1 2665.33  104.79
  -3   4   1 2457.25  104.59
  -2   4   1 9717.53  394.16
   2   4  -1 9672.73  394.06
   1  -4  -1 1034.10   44.30
  -1  -4   1 1042.60   44.30
  -1  -4   1 1054.09   44.30
   1  -4  -1 1134.49   44.60
   1   4  -1 1060.29   45.10
   1   4  -1 1115.99   44.50
  -1   4   1 1059.19   45.30
   1   4  -1 1119.99   44.40
  -1   4   1 1059.19   44.40
  -1   4   1 1030.80   44.40
   0  -4  -1  199.48    8.50
   0  -4  -1  186.48    8.90
   0  -4  -1  161.48    8.20
   0  -4   1  170.38    8.40
   0   4  -1  181.68    8.50
   0   4  -1  171.18    8.70
   0   4   1  174.48    8.60
   0   4   1  161.28    9.00
   0   4  -1  156.68    8.90
  -1  -4  -1 2088.89   86.89
  -1  -4  -1 2116.99   86.49
   1  -4   1 2039.80   86.19
   1  -4   1 2042.20   86.39
   1  -4   1 2257.57   86.89
   1   4   1 2099.39   87.19
   1   4   1 2152.28   86.59
  -1   4  -1 1995.50   86.19
  -1   4  -1 2095.09   86.49
   1   4   1 2164.38   86.19
  -1   4  -1 2208.28   86.99
  -2  -4  -1  777.92   33.70
  -2  -4  -1  774.22   33.00
   2  -4   1  816.02   33.10
   2  -4   1  783.62   33.70
  -2   4  -1  846.02   34.60
  -2   4  -1  795.12   32.80
   2   4   1  771.62   33.10
   2   4   1  841.92   32.80
  -2   4  -1  765.62   32.50
  -2   4  -1  758.72   33.00
   2   4   1  743.63   34.00
   3  -4   1  652.93   26.20
  -3  -4  -1  608.74   26.40
  -3  -4  -1  592.64   27.40
   3  -4   1  606.54   27.20
   3  -4   1  645.64   26.60
   3   4   1  613.64   28.00
  -3   4  -1  598.74   26.40
   3   4   1  681.13   26.40
   3   4   1  650.13   26.70
  -3   4  -1  638.64   28.60
  -3   4  -1  552.24   26.10
  -4  -4  -1  967.70   42.30
   4  -4   1  989.50   41.10
  -4  -4  -1  933.41   40.90
   4  -4   1 1000.00   40.90
   4  -4   1  963.90   41.90
  -4   4  -1 1010.80   43.20
  -4   4  -1  929.01   40.80
   4   4   1  972.60   41.10
   4   4   1 1049.49   41.30
   4   4   1  943.11   42.50
   5  -4   1 1409.06   56.79
  -5  -4  -1 1334.07   56.39
   5  -4   1 1310.97   57.59
   5  -4   1 1383.16   56.69
  -5  -4  -1 1271.77   57.99
   5   4   1 1413.56   56.99
   5   4   1 1313.67   58.59
  -5   4  -1 1301.87   56.39
  -5   4  -1 1347.77   59.19
   5   4   1 1431.66   56.79
   6  -4   1   15.80    6.60
   6  -4   1    3.40    5.90
   6  -4   1   16.90    8.80
  -6  -4  -1   -0.60    4.60
   6   4   1   -1.60    6.80
  -6   4  -1   -6.70    4.60
   6   4   1   -2.90    5.40
  -7  -4  -1 2092.99   88.09
   7  -4   1 2102.89   89.69
  -7  -4  -1 2040.00   90.29
   7  -4   1 2224.48   88.49
   7  -4   1 2104.99   88.89
   7   4   1 2253.47   88.49
   7   4   1 2131.89   90.99
   7   4   1 2128.89   88.89
  -7   4  -1 2065.09   91.19
  -7   4  -1 2075.99   88.09
   8  -4   1  390.26   21.90
   8  -4   1  367.96   20.70
  -8  -4  -1  371.16   18.60
   8  -4   1  401.56   19.60
  -8  -4  -1  361.56   22.70
   8   4   1  418.16   19.40
   8   4   1  387.46   20.30
   8   4   1  402.06   24.90
  -8   4  -1  363.26   23.30
  -8   4  -1  386.76   19.00
   9  -4   1   95.39   11.30
  -9  -4  -1   85.59    8.80
  -9  -4  -1   95.39   12.10
   9  -4   1   74.99    9.60
   9  -4   1   84.49   12.50
   9   4   1   68.69    9.10
   9   4   1   91.39   10.80
  -9   4  -1   99.09    9.10
  -9   4  -1   81.09   16.00
   9   4   1   97.39   14.90
 -10  -4  -1  337.07   18.30
 -10  -4  -1  353.16   23.20
  10  -4   1  342.87   21.90
  10  -4   1  341.67   19.00
  10  -4   1  360.36   22.10
  10   4   1  366.16   24.30
 -10   4  -1  341.77   23.40
 -10   4  -1  346.47   18.60
  10   4   1  325.17   19.90
  10   4   1  342.47   18.70
  11  -4   1  243.98   16.40
 -11  -4  -1  258.37   19.80
  11  -4   1  267.27   20.30
  11  -4   1  274.67   20.20
 -11  -4  -1  252.47   15.90
 -11   4  -1  244.28   23.40
  11   4   1  238.58   16.40
  11   4   1  237.68   20.80
  11   4   1  283.87   23.10
 -11   4  -1  258.97   16.20
 -12  -4  -1   14.60   12.80
  12  -4   1   12.90   10.40
 -12  -4  -1   25.80    7.40
  12  -4   1    9.30    7.60
  12  -4   1   24.90   10.40
  12   4   1   -5.20    7.00
 -12   4  -1    9.40   13.90
  12   4   1   20.30    9.70
  12   4   1   24.20   14.80
 -12   4  -1   13.10    7.30
  13  -4   1   32.10   12.50
 -13  -4  -1   23.00    7.30
 -13  -4  -1   32.70   12.20
  13  -4   1   15.00    7.90
  13  -4   1   22.30   11.30
  13   4   1   24.90    7.90
 -13   4  -1   24.10    7.60
  13   4   1   24.60   15.90
 -13   4  -1   28.20   14.70
  13   4   1   14.90   10.30
  14  -4   1   63.99   13.10
 -14  -4  -1   77.29   15.60
  14  -4   1   54.49   13.70
 -14  -4  -1   39.40    8.30
 -14   4  -1   96.09   17.00
  14   4   1   40.00   16.80
  14   4   1   66.99   11.80
 -14   4  -1   63.29    9.50
  15  -4   1   -3.70   10.70
 -15  -4  -1    4.60   11.20
  15   4   1  -19.50   15.10
 -15   4  -1   14.20   11.90
  15   4   1    2.10    9.40
 -15   4  -1   -7.90    7.10
  16  -4   1    5.60   12.80
 -16  -4  -1   51.79   14.20
  16   4   1    8.50   10.30
 -17  -4  -1   37.20    8.90
  17  -4   1   31.50   15.00
  17   4   1   45.70   11.60
 -17   4  -1   22.00    8.40
  17   5  -1   14.20   10.10
  16  -5  -1   49.60   14.70
 -16  -5   1   40.30    8.90
 -16   5   1   40.40    8.90
  16   5  -1   28.30   10.30
  15  -5  -1   57.69   14.90
 -15  -5   1   58.89    9.60
  15  -5  -1   28.30   12.80
 -15  -5   1   86.19   18.00
 -15   5   1   81.39   17.10
 -15   5   1   45.00    8.60
  15   5  -1   19.10   18.20
  15   5  -1   42.00   10.60
 -14  -5   1   49.00    8.60
 -14  -5   1   71.79   15.20
  14  -5  -1   60.99    9.80
  14  -5  -1   59.89   14.30
  14  -5  -1   30.90   12.20
 -14   5   1   73.29   16.50
  14   5  -1   61.49    9.90
  14   5  -1   60.49   11.40
  14   5  -1   34.80   17.80
 -14   5   1   45.00    8.40
  13  -5  -1   53.19   12.10
  13  -5  -1   26.20   11.20
  13  -5  -1   44.60    9.00
 -13  -5   1   43.40    8.50
 -13  -5   1   52.59   12.90
  13   5  -1   43.00    9.30
  13   5  -1   41.00   18.00
 -13   5   1   45.10    8.10
 -13   5   1   57.79   14.40
  13   5  -1   45.10   11.10
  12  -5  -1   31.70   10.90
  12  -5  -1   33.40    8.50
 -12  -5   1   28.00    7.60
 -12  -5   1   38.20   13.40
  12  -5  -1   41.50   11.00
  12   5  -1   31.70    8.80
  12   5  -1   26.80   14.30
  12   5  -1   33.50    8.20
 -12   5   1   34.50   15.20
 -11  -5   1   19.10    6.50
  11  -5  -1   22.20    9.80
  11  -5  -1   29.20   11.00
 -11  -5   1   20.10   11.90
  11  -5  -1   23.10    7.60
  11   5  -1   21.60    9.20
 -11   5   1   30.70    7.30
 -11   5   1   16.50   14.00
  11   5  -1   24.10    7.20
  11   5  -1   28.70   16.10
  10  -5  -1  218.18   16.90
  10  -5  -1  215.48   16.70
 -10  -5   1  226.58   14.10
  10  -5  -1  240.28   15.00
 -10  -5   1  191.88   17.00
 -10   5   1  232.28   14.30
  10   5  -1  232.48   14.60
  10   5  -1  216.88   15.60
  10   5  -1  223.18   21.30
 -10   5   1  204.58   19.60
  -9  -5   1    1.40    4.80
   9  -5  -1    0.20    9.70
  -9  -5   1   -0.20    7.90
   9  -5  -1    5.30    6.70
   9  -5  -1   -1.90    5.80
   9   5  -1    4.70    6.80
   9   5  -1    4.70   11.00
  -9   5   1    4.40    5.00
  -9   5   1    8.70   11.30
   9   5  -1   -0.50    5.40
   8  -5  -1 1293.47   58.29
   8  -5  -1 1383.26   57.99
   8  -5  -1 1377.66   57.29
  -8  -5   1 1281.87   56.59
  -8  -5   1 1290.97   58.89
  -8   5   1 1325.47   60.59
   8   5  -1 1355.16   57.59
   8   5  -1 1407.96   61.29
  -8   5   1 1281.47   56.79
   8   5  -1 1346.57   57.09
   7  -5  -1  521.15   26.60
  -7  -5   1  519.85   24.60
  -7  -5   1  498.95   26.80
   7  -5  -1  560.74   25.50
   7  -5  -1  570.44   26.30
   7   5  -1  539.35   29.30
   7   5  -1  534.35   25.30
  -7   5   1  540.85   24.80
  -7   5   1  528.35   29.80
   7   5  -1  526.75   25.50
   6  -5  -1   16.80    6.80
  -6  -5   1   -8.20    7.50
   6  -5  -1    9.60    7.70
   6  -5  -1   16.30    6.80
  -6  -5   1    8.70    4.90
  -6   5   1   17.40   13.90
   6   5  -1    2.90    6.50
   6   5  -1    5.30    6.10
  -6   5   1    5.80    4.90
   6   5  -1  -13.20   15.70
  -5  -5   1  131.09    9.20
   5  -5  -1  145.09   11.70
   5  -5  -1  140.49   10.70
   5  -5  -1  154.78   10.30
   5   5  -1  154.38   10.70
   5   5  -1  128.29   10.20
   5   5  -1  115.19   14.90
  -5   5   1  123.49    9.60
   4  -5  -1 1414.26   57.49
  -4  -5   1 1335.07   58.09
   4  -5  -1 1376.36   58.09
   4  -5  -1 1407.56   57.39
  -4  -5   1 1325.57   57.09
  -4   5   1 1324.07   57.09
   4   5  -1 1344.47   58.99
   4   5  -1 1384.76   57.49
  -4   5   1 1379.46   59.99
   4   5  -1 1441.26   57.29
   3  -5  -1  137.29    7.80
   3  -5  -1  132.99    7.80
  -3  -5   1  131.79    7.10
  -3  -5   1  115.39    7.90
   3  -5  -1  124.69    8.60
  -3   5   1  131.49   11.30
  -3   5   1  125.29    7.10
   3   5  -1  133.09    7.50
   3   5  -1  133.59    7.40
   3   5  -1  118.79    9.50
   2  -5  -1 9397.26  387.86
  -2  -5   1 9671.93  387.96
   2   5  -1 9467.35  388.76
  -2   5   1 9333.77  388.86
   2   5  -1 9999.00  388.06
  -2   5   1 9512.75  387.86
   1  -5  -1 1229.98   48.80
  -1  -5   1 1187.78   48.70
   1  -5  -1 1121.09   48.60
  -1  -5   1 1184.58   48.70
   1   5  -1 1182.18   48.70
   1   5  -1 1147.59   48.80
  -1   5   1 1141.29   48.80
  -1   5   1 1209.98   49.80
  -1   5   1 1161.68   48.70
   1   5  -1 1174.38   49.40
   0  -5  -1  255.57   12.10
   0  -5  -1  300.17   12.20
   0  -5  -1  273.27   12.50
   0  -5   1  244.28   12.00
   0   5  -1  247.78   12.50
   0   5   1  265.57   12.30
   0   5  -1  288.57   12.80
   0   5  -1  261.67   12.20
   0   5  -1  262.47   12.30
   0   5   1  254.77   12.70
   1  -5   1  729.13   30.20
  -1  -5  -1  708.63   29.70
   1  -5   1  701.53   29.70
  -1  -5  -1  711.03   30.20
   1   5   1  715.83   29.80
   1   5   1  681.93   30.50
  -1   5  -1  692.73   29.70
  -1   5  -1  723.23   30.40
  -1   5  -1  650.73   29.50
   1   5   1  728.13   29.30
   2  -5   1   62.49    5.00
   2  -5   1   51.09    5.30
  -2  -5  -1   44.40    5.10
  -2  -5  -1   55.09    4.50
  -2   5  -1   49.10    3.60
  -2   5  -1   48.00    4.50
  -2   5  -1   54.79    4.70
  -2   5  -1   58.29    7.90
   2   5   1   37.20    6.70
   2   5   1   54.19    4.00
   2   5   1   54.89    5.40
  -3  -5  -1  685.33   29.70
  -3  -5  -1  665.53   30.60
   3  -5   1  700.23   30.60
   3  -5   1  704.73   29.20
  -3   5  -1  691.43   29.40
   3   5   1  768.22   29.50
  -3   5  -1  669.73   29.60
   3   5   1  688.23   31.10
   3   5   1  708.93   29.80
  -3   5  -1  697.33   32.10
   4  -5   1   28.90    6.40
  -4  -5  -1   12.60    5.80
  -4  -5  -1   16.30    3.50
   4  -5   1   16.30    4.50
   4  -5   1   24.00    4.90
  -4   5  -1   17.20    8.80
   4   5   1   17.60    4.00
   4   5   1    6.00    6.70
   4   5   1   17.80    4.10
  -4   5  -1   17.80    6.20
  -4   5  -1   16.80    3.80
  -5  -5  -1 2056.69   90.69
   5  -5   1 2141.19   90.49
  -5  -5  -1 2041.90   89.09
   5  -5   1 2256.77   89.19
   5  -5   1 2201.68   89.49
   5   5   1 2241.38   89.49
  -5   5  -1 2260.97   92.49
  -5   5  -1 2094.39   89.19
   5   5   1 2102.09   91.59
   5   5   1 2207.98   89.49
   6  -5   1 4162.38  168.18
  -6  -5  -1 3989.10  169.98
  -6  -5  -1 3956.90  168.08
   6  -5   1 4118.09  169.48
   6  -5   1 4289.17  168.38
  -6   5  -1 4096.49  168.08
  -6   5  -1 4197.98  171.08
   6   5   1 4178.18  168.38
   6   5   1 4218.28  168.48
   6   5   1 3852.71  172.78
   7  -5   1  179.98   12.30
   7  -5   1  173.28   13.80
   7  -5   1  175.18   12.60
  -7  -5  -1  164.78   10.30
  -7  -5  -1  142.49   15.00
  -7   5  -1  135.09   17.90
  -7   5  -1  159.08   10.90
   7   5   1  149.79   16.10
   7   5   1  175.68   12.00
   7   5   1  172.28   11.60
   8  -5   1  499.85   26.20
   8  -5   1  509.15   24.70
   8  -5   1  497.75   24.00
  -8  -5  -1  489.65   26.80
  -8  -5  -1  480.15   23.20
   8   5   1  521.45   28.90
  -8   5  -1  501.25   23.60
   8   5   1  511.55   24.40
  -8   5  -1  499.75   28.60
   8   5   1  490.35   23.80
   9  -5   1  363.86   21.00
   9  -5   1  395.66   20.10
  -9  -5  -1  368.16   22.20
  -9  -5  -1  376.36   19.30
   9   5   1  406.56   24.70
  -9   5  -1  399.56   19.60
   9   5   1  367.66   20.30
   9   5   1  388.36   19.60
  -9   5  -1  365.26   25.00
  10  -5   1    7.10    7.50
 -10  -5  -1    9.90   10.50
 -10  -5  -1    0.80    5.20
  10  -5   1    5.90    8.70
  10  -5   1    1.20    6.30
 -10   5  -1    5.10    5.60
  10   5   1   -1.10    5.70
  10   5   1   12.10   11.00
 -10   5  -1   -6.50   10.40
  10   5   1    3.30    7.60
  11  -5   1  143.49   17.10
  11  -5   1  125.99   12.80
 -11  -5  -1  125.89   15.80
 -11  -5  -1  142.19   12.00
  11   5   1  143.39   20.10
 -11   5  -1  130.89   12.80
 -11   5  -1  138.89   20.40
  11   5   1  141.49   23.50
  11   5   1  120.59   12.20
 -12  -5  -1  739.93   39.80
  12  -5   1  780.82   36.60
  12  -5   1  765.52   38.70
  12  -5   1  812.52   39.10
 -12  -5  -1  744.43   35.80
 -12   5  -1  767.02   36.20
  12   5   1  761.02   36.30
 -12   5  -1  761.32   41.00
  12   5   1  749.73   37.10
  12   5   1  782.22   42.50
  13  -5   1  219.48   19.50
 -13  -5  -1  226.58   20.00
  13  -5   1  214.48   18.90
  13  -5   1  207.38   16.00
 -13  -5  -1  217.48   15.90
  13   5   1  229.08   27.30
  13   5   1  199.18   16.40
  13   5   1  222.38   17.80
 -13   5  -1  212.48   16.10
 -13   5  -1  228.38   21.70
 -14  -5  -1    8.90    7.30
  14  -5   1   -6.70    6.40
  14  -5   1   -2.20   10.60
 -14  -5  -1   39.90   14.00
  14  -5   1   15.90   11.20
  14   5   1    7.50   16.10
 -14   5  -1   31.00   14.50
  14   5   1   -4.30    6.10
 -14   5  -1    5.80    7.40
  14   5   1   12.80    9.50
 -15  -5  -1   11.80   12.50
  15  -5   1   -3.90   12.60
  15   5   1   -3.00    9.00
 -15   5  -1   34.30   14.00
 -15   5  -1    4.30    7.50
 -16  -5  -1   51.19    9.60
  16  -5   1   58.19   14.00
  16   5   1   65.99   12.40
  16   5   1   19.40   17.70
 -16   5  -1   69.39   10.40
  17  -6  -1   26.30   15.30
 -17  -6   1   26.00    8.90
 -17   6   1   25.20    8.30
  17   6  -1   35.20   10.40
 -16  -6   1   34.10   13.00
  16  -6  -1  -19.00   12.70
 -16  -6   1   -9.50    6.90
  16   6  -1    5.70    8.90
 -16   6   1   -3.40    7.00
 -15  -6   1   13.60   12.40
  15  -6  -1   -4.40   11.20
 -15   6   1   19.20   14.10
  15   6  -1   -7.70    8.40
 -14  -6   1    4.50   12.50
  14  -6  -1    7.60   11.10
 -14  -6   1    4.50    6.90
  14   6  -1   -7.00   14.90
 -14   6   1   -0.20    7.00
 -14   6   1   24.00   13.20
  14   6  -1    7.80    9.30
  14   6  -1   -7.50    6.70
  13  -6  -1   45.70   12.80
  13  -6  -1   32.60    8.50
 -13  -6   1   36.40   12.20
 -13  -6   1   33.00    8.00
  13  -6  -1   29.90   11.00
  13   6  -1   24.80    8.20
 -13   6   1   33.60    8.10
 -13   6   1   46.70   15.70
  13   6  -1   27.80   17.00
  13   6  -1   26.10    9.40
 -12  -6   1   64.19   14.10
  12  -6  -1   64.39    9.50
  12  -6  -1   62.49   11.20
  12  -6  -1   73.99   13.30
 -12   6   1   54.59   14.80
  12   6  -1   67.49    9.70
  12   6  -1   58.59   15.70
  12   6  -1   52.39   10.30
 -11  -6   1  171.58   13.00
  11  -6  -1  168.98   14.50
 -11  -6   1  151.68   16.10
  11  -6  -1  171.28   16.60
  11  -6  -1  175.88   16.70
  11   6  -1  169.88   14.10
 -11   6   1  158.48   19.70
  11   6  -1  199.38   25.10
  11   6  -1  167.98   15.90
 -11   6   1  163.78   13.60
  10  -6  -1   50.49    9.10
 -10  -6   1   65.59   12.40
  10  -6  -1   52.69    8.00
 -10  -6   1   52.89    7.50
  10  -6  -1   67.19   12.10
  10   6  -1   53.59    9.30
 -10   6   1   62.49    9.80
  10   6  -1   63.19    8.50
  10   6  -1   62.09   13.30
 -10   6   1   47.80   13.00
   9  -6  -1  916.31   47.60
  -9  -6   1  959.00   43.40
   9  -6  -1 1026.60   44.10
   9  -6  -1 1031.20   44.80
  -9  -6   1  931.21   45.70
   9   6  -1  987.90   44.20
  -9   6   1  986.20   43.60
   9   6  -1 1010.40   44.00
   9   6  -1 1044.00   49.10
  -9   6   1 1012.70   48.60
   8  -6  -1   23.40    7.70
   8  -6  -1   22.90    6.50
   8  -6  -1   15.60    5.80
  -8  -6   1   18.50    5.20
  -8  -6   1   19.90    8.70
   8   6  -1   14.90    9.90
  -8   6   1   14.30    4.70
  -8   6   1   21.10   10.70
   8   6  -1   26.00    6.60
   8   6  -1   13.60    5.40
  -7  -6   1  862.31   38.90
   7  -6  -1  905.21   39.10
   7  -6  -1  926.01   39.00
  -7  -6   1  819.92   40.60
   7  -6  -1  862.61   40.10
   7   6  -1  883.21   42.30
  -7   6   1  861.71   38.20
  -7   6   1  873.61   43.60
   7   6  -1  899.81   39.10
   7   6  -1  905.71   39.00
   6  -6  -1 2457.45   97.79
   6  -6  -1 2448.16   97.89
   6  -6  -1 2358.76   98.99
  -6  -6   1 2259.97   97.29
  -6  -6   1 2219.68   98.99
  -6   6   1 2323.27   97.39
   6   6  -1 2336.77   97.69
   6   6  -1 2433.66   97.89
  -6   6   1 2363.56  101.39
   6   6  -1 2329.27  100.29
   5  -6  -1 1362.06   55.29
  -5  -6   1 1276.97   54.69
  -5  -6   1 1230.38   56.09
   5  -6  -1 1351.86   55.09
   5  -6  -1 1307.87   56.29
   5   6  -1 1314.77   55.19
   5   6  -1 1309.47   54.99
  -5   6   1 1288.47   54.69
  -5   6   1 1317.87   59.29
   5   6  -1 1216.78   57.59
  -4  -6   1 1303.57   55.09
   4  -6  -1 1322.27   55.99
  -4  -6   1 1269.27   55.99
   4  -6  -1 1330.37   55.29
  -4   6   1 1303.57   55.09
  -4   6   1 1390.56   58.59
   4   6  -1 1291.17   57.69
   4   6  -1 1288.97   55.39
   4   6  -1 1338.77   55.09
   3  -6  -1 4145.29  167.18
   3  -6  -1 4009.80  167.68
  -3  -6   1 4084.49  167.68
  -3  -6   1 4057.49  167.18
   3   6  -1 4095.19  167.38
   3   6  -1 4088.19  168.58
  -3   6   1 4205.68  168.88
  -3   6   1 3998.10  167.08
   3   6  -1 4181.38  167.18
  -2  -6   1  827.02   35.20
   2  -6  -1  864.21   35.70
  -2  -6   1  838.22   35.50
   2  -6  -1  828.42   35.30
   2   6  -1  835.02   35.50
  -2   6   1  867.71   36.90
  -2   6   1  801.02   35.10
   2   6  -1  847.12   35.20
  -2   6   1  836.02   35.30
   2   6  -1  820.52   36.50
   1  -6  -1  176.28    9.30
   1  -6  -1  201.88    9.60
  -1  -6   1  180.88    9.20
  -1  -6   1  189.98    9.30
   1   6  -1  188.68    9.60
  -1   6   1  178.38    9.40
   1   6  -1  185.68    9.20
  -1   6   1  194.88   11.30
   1   6  -1  176.58   10.50
  -1   6   1  182.58    9.50
   0  -6  -1   75.19    5.20
   0  -6   1   60.99    4.80
   0  -6  -1   61.79    4.80
   0   6  -1   60.19    5.10
   0   6  -1   64.59    5.00
   0   6   1   64.49    5.10
   0   6  -1   61.89    5.40
   0   6  -1   64.39    6.10
   0   6   1   61.09    5.60
  -1  -6  -1  267.17   12.50
  -1  -6  -1  259.67   12.90
   1  -6   1  264.67   12.50
   1  -6   1  291.87   13.20
   1   6   1  261.87   13.60
   1   6   1  272.27   12.00
  -1   6  -1  270.27   12.50
  -1   6  -1  258.77   12.40
  -1   6  -1  281.07   13.50
   1   6   1  273.17   12.70
   2  -6   1  249.08   12.40
  -2  -6  -1  233.18   11.40
   2  -6   1  235.08   11.40
  -2  -6  -1  223.38   11.90
  -2   6  -1  229.68   11.40
  -2   6  -1  242.28   13.20
   2   6   1  223.28   13.10
   2   6   1  233.78   11.40
  -2   6  -1  234.68   10.80
   2   6   1  253.97   10.90
  -3  -6  -1  428.46   20.70
   3  -6   1  449.46   21.10
   3  -6   1  449.66   19.90
  -3  -6  -1  429.96   19.60
   3   6   1  403.56   21.90
   3   6   1  455.05   20.10
  -3   6  -1  450.95   21.30
   3   6   1  462.45   19.40
  -3   6  -1  431.96   18.90
  -3   6  -1  473.65   22.80
  -3   6  -1  426.76   19.80
  -4  -6  -1 2673.63  113.99
   4  -6   1 2743.63  113.99
  -4  -6  -1 2652.93  112.89
   4  -6   1 2847.11  113.09
   4  -6   1 2634.94  112.29
   4   6   1 2837.92  112.69
   4   6   1 2848.11  113.09
   4   6   1 2745.43  114.99
  -4   6  -1 2697.53  112.89
  -4   6  -1 2799.42  115.19
  -5  -6  -1   90.39    8.50
   5  -6   1  109.29   11.50
   5  -6   1  110.89    8.70
   5  -6   1   94.49   10.20
  -5   6  -1   94.89    9.20
  -5   6  -1  103.99   15.70
   5   6   1   87.69    9.00
   5   6   1   98.99    9.70
   6  -6   1    3.00    6.00
   6  -6   1    4.00    7.60
   6  -6   1   11.60    5.10
  -6  -6  -1    8.60    4.70
   6   6   1    6.80    5.60
   6   6   1   -7.20    5.70
  -6   6  -1    1.50    5.00
  -6   6  -1  -15.20    9.90
   7  -6   1  841.82   35.90
   7  -6   1  837.02   36.00
  -7  -6  -1  797.82   35.70
   7  -6   1  797.42   37.50
  -7  -6  -1  759.72   37.60
   7   6   1  831.02   36.00
  -7   6  -1  787.52   39.20
   7   6   1  821.72   35.90
   7   6   1  792.72   39.00
  -7   6  -1  842.02   35.80
   8  -6   1  375.96   19.40
  -8  -6  -1  344.67   21.90
   8  -6   1  380.16   19.50
  -8  -6  -1  375.16   18.80
   8  -6   1  374.56   21.10
   8   6   1  370.86   19.20
   8   6   1  398.36   19.30
  -8   6  -1  373.36   24.10
  -8   6  -1  384.36   19.00
   8   6   1  373.56   23.30
   9  -6   1   67.59   11.50
  -9  -6  -1   49.30    8.20
   9  -6   1   46.70    7.20
  -9  -6  -1   64.89   13.50
   9  -6   1   59.69   10.10
   9   6   1   57.19   12.80
  -9   6  -1   69.69   13.30
   9   6   1   47.30    8.20
   9   6   1   53.59    8.80
  -9   6  -1   60.99    8.80
 -10  -6  -1  443.06   26.90
 -10  -6  -1  480.85   24.10
  10  -6   1  508.45   25.60
  10  -6   1  509.45   24.80
  10  -6   1  440.26   26.40
  10   6   1  491.25   24.40
  10   6   1  498.95   25.10
 -10   6  -1  487.45   30.30
 -10   6  -1  480.45   24.30
  10   6   1  513.25   31.80
 -11  -6  -1  169.48   15.20
  11  -6   1  184.88   17.00
 -11  -6  -1  177.68   17.20
  11  -6   1  198.58   17.40
  11  -6   1  175.48   14.60
  11   6   1  180.58   13.80
  11   6   1  190.18   24.60
 -11   6  -1  187.08   20.00
 -12  -6  -1  147.89   16.80
  12  -6   1  137.69   13.90
  12  -6   1  158.68   18.90
 -12  -6  -1  141.69   12.90
  12  -6   1  128.89   16.70
  12   6   1  179.28   25.20
 -12   6  -1  141.39   13.40
  12   6   1  129.09   13.00
  12   6   1  121.79   14.60
 -12   6  -1  146.49   21.50
 -13  -6  -1  135.29   13.30
 -13  -6  -1  138.29   18.80
  13  -6   1  126.19   17.60
  13  -6   1  145.39   19.20
  13  -6   1  114.59   13.30
 -13   6  -1  129.79   13.90
  13   6   1  122.49   15.60
 -13   6  -1  139.19   18.90
  13   6   1  126.69   22.70
  13   6   1  128.79   13.10
  14  -6   1  228.08   20.90
 -14  -6  -1  222.88   20.00
 -14  -6  -1  202.88   16.20
  14  -6   1  212.58   20.00
  14   6   1  244.98   19.80
  14   6   1  194.48   28.00
 -14   6  -1  236.78   21.80
  14   6   1  208.08   17.90
 -14   6  -1  223.18   16.80
 -15  -6  -1   53.79    9.00
  15  -6   1   52.09   14.70
  15  -6   1   43.00   12.60
 -15   6  -1   47.30    9.20
  15   6   1   32.70   18.40
  15   6   1   60.09   11.70
 -16  -6  -1   23.20   12.90
  16   6   1    5.00    8.90
 -16  -7   1   -6.80    6.50
  16  -7  -1  -10.20   12.80
 -16  -7   1   25.20   10.90
 -16   7   1   -2.90    7.20
 -16   7   1   29.60   13.00
  16   7  -1    3.10    8.60
 -15  -7   1   -6.00    6.70
 -15  -7   1   28.70   11.50
  15  -7  -1   -9.60   11.20
 -15   7   1   -1.80    7.20
  15   7  -1  -17.90   17.30
  15   7  -1    8.80    9.10
 -15   7   1   35.60   14.80
  14  -7  -1   32.60   13.50
  14  -7  -1   21.50    8.00
 -14  -7   1   55.09   14.20
  14  -7  -1   31.70   11.30
 -14  -7   1   44.30    8.70
  14   7  -1   36.50    9.60
 -14   7   1   43.30    9.00
 -14   7   1   47.90   13.90
  14   7  -1   13.90   17.70
 -13  -7   1   55.99    9.10
 -13  -7   1   68.79   13.20
  13  -7  -1   54.39    9.50
  13  -7  -1   60.79   11.60
  13  -7  -1   53.69   13.90
 -13   7   1   65.59   16.70
  13   7  -1   50.39   10.10
  13   7  -1   47.90   18.00
  13   7  -1   54.79    9.10
 -13   7   1   51.19    9.50
 -12  -7   1   17.60   12.00
  12  -7  -1   24.80    8.50
  12  -7  -1   22.70   11.00
  12  -7  -1   24.80    9.70
  12   7  -1   33.70    8.40
 -12   7   1   19.80   14.80
 -12   7   1   17.90    7.50
  12   7  -1   20.20    9.20
  12   7  -1   17.70   15.90
  11  -7  -1  406.66   22.60
 -11  -7   1  368.86   20.80
 -11  -7   1  372.86   23.80
  11  -7  -1  370.86   25.10
  11   7  -1  341.37   23.50
  11   7  -1  383.76   28.50
 -11   7   1  372.56   28.40
 -11   7   1  394.06   21.40
  11   7  -1  393.66   21.60
 -10  -7   1   10.00    5.80
  10  -7  -1   15.00    7.60
  10  -7  -1   12.80    7.30
  10  -7  -1   24.70    9.70
 -10  -7   1    7.10   10.10
  10   7  -1   11.10    7.60
 -10   7   1    7.10    6.20
  10   7  -1   11.90    6.30
  10   7  -1    7.00   13.50
 -10   7   1    6.50   13.40
   9  -7  -1  163.68   14.60
   9  -7  -1  176.68   13.40
   9  -7  -1  177.18   13.50
  -9  -7   1  149.99   11.50
  -9  -7   1  147.49   15.40
   9   7  -1  162.48   18.90
  -9   7   1  166.98   18.70
  -9   7   1  173.28   11.50
   9   7  -1  161.48   12.70
   9   7  -1  154.18   12.50
   8  -7  -1  379.46   19.60
   8  -7  -1  370.26   19.40
   8  -7  -1  370.86   21.60
  -8  -7   1  357.76   21.40
  -8  -7   1  360.56   18.20
  -8   7   1  371.96   18.80
  -8   7   1  361.46   23.80
   8   7  -1  359.36   25.20
   8   7  -1  371.96   19.40
   8   7  -1  372.06   19.20
   7  -7  -1  372.56   18.50
  -7  -7   1  336.97   17.40
   7  -7  -1  342.47   19.50
   7  -7  -1  349.07   18.30
  -7  -7   1  318.47   19.90
  -7   7   1  356.26   17.70
  -7   7   1  364.46   24.70
   7   7  -1  343.57   18.10
   7   7  -1  332.87   17.70
   7   7  -1  331.87   23.50
   6  -7  -1  174.88   11.60
   6  -7  -1  158.78   12.00
  -6  -7   1  160.28   10.60
  -6  -7   1  138.19   12.00
   6  -7  -1  169.88   14.10
   6   7  -1  139.09   11.20
   6   7  -1  146.69   17.90
   6   7  -1  153.68   11.50
  -6   7   1  152.78   10.90
  -6   7   1  185.98   19.90
   5  -7  -1  564.24   26.20
   5  -7  -1  583.64   27.70
  -5  -7   1  550.94   25.40
   5  -7  -1  567.44   25.90
  -5  -7   1  518.55   27.00
   5   7  -1  527.95   30.30
   5   7  -1  568.04   26.10
  -5   7   1  577.04   25.70
   5   7  -1  547.35   25.70
  -5   7   1  601.74   32.10
  -4  -7   1  191.98   11.20
   4  -7  -1  219.88   12.30
   4  -7  -1  181.48   11.60
   4  -7  -1  204.98   13.00
  -4  -7   1  158.68   12.40
   4   7  -1  176.28   12.10
  -4   7   1  185.28   11.50
   4   7  -1  140.49   15.70
   4   7  -1  177.88   11.30
   3  -7  -1 1482.45   61.39
  -3  -7   1 1448.66   60.69
  -3  -7   1 1417.66   61.09
   3  -7  -1 1456.15   60.69
  -3   7   1 1453.65   60.59
   3   7  -1 1405.16   62.59
  -3   7   1 1444.46   62.89
   3   7  -1 1477.15   60.89
   3   7  -1 1506.65   60.59
  -3   7   1 1421.96   60.19
  -2  -7   1  458.95   20.60
   2  -7  -1  489.15   21.30
   2  -7  -1  430.46   20.70
  -2  -7   1  451.65   20.90
  -2   7   1  446.26   20.70
   2   7  -1  444.26   22.30
   2   7  -1  474.45   20.60
  -2   7   1  469.65   20.60
  -2   7   1  481.55   23.00
   2   7  -1  468.55   20.80
  -1  -7   1  873.01   36.40
   1  -7  -1  843.62   36.30
   1  -7  -1  922.41   36.60
  -1  -7   1  850.21   36.30
   1   7  -1  841.72   37.20
  -1   7   1  897.71   37.80
   1   7  -1  839.42   36.30
  -1   7   1  847.32   36.40
   1   7  -1  832.72   36.70
  -1   7   1  831.02   36.50
   0  -7  -1   58.39    5.60
   0  -7   1   64.19    5.40
   0  -7  -1   62.09    5.70
   0   7  -1   65.39    7.20
   0   7   1   47.30    6.30
   0   7  -1   47.00    6.70
   0   7   1   59.59    5.70
   0   7  -1   55.99    5.10
   0   7  -1   54.39    5.80
   1  -7   1  466.95   21.20
  -1  -7  -1  467.35   21.30
   1  -7   1  528.45   22.10
  -1  -7  -1  480.45   21.80
  -1   7  -1  499.65   22.30
  -1   7  -1  472.95   21.40
  -1   7  -1  466.75   21.40
   1   7   1  490.95   20.80
   1   7   1  468.95   22.40
   1   7   1  482.45   21.50
   2  -7   1 2360.96   95.09
  -2  -7  -1 2306.87   94.49
  -2  -7  -1 2276.07   95.09
   2  -7   1 2322.37   94.79
  -2   7  -1 2386.06   95.59
   2   7   1 2261.37   95.69
  -2   7  -1 2245.38   94.49
   2   7   1 2354.36   93.99
  -2   7  -1 2125.79   93.99
   2   7   1 2325.47   94.69
   3  -7   1 2258.17   91.49
  -3  -7  -1 2137.39   91.39
  -3  -7  -1 2149.98   90.49
   3  -7   1 2191.88   90.49
   3   7   1 2312.57   90.09
  -3   7  -1 2172.48   90.49
   3   7   1 2107.89   91.89
  -3   7  -1 2260.37   92.59
   3   7   1 2258.17   90.69
  -3   7  -1 2083.79   89.69
  -4  -7  -1  302.37   18.20
  -4  -7  -1  336.17   16.20
   4  -7   1  346.67   18.40
   4   7   1  284.97   20.00
   4   7   1  354.66   17.20
  -4   7  -1  330.37   16.70
  -4   7  -1  372.96   22.90
   4   7   1  340.87   16.00
  -5  -7  -1  987.20   46.20
   5  -7   1 1059.09   46.40
   5  -7   1 1036.60   43.90
  -5  -7  -1 1027.30   44.60
   5  -7   1 1095.29   45.00
   5   7   1 1048.50   44.90
  -5   7  -1 1018.50   44.40
   5   7   1  973.80   47.20
   5   7   1 1099.29   44.40
  -5   7  -1 1060.99   48.70
  -6  -7  -1  672.83   31.00
  -6  -7  -1  656.43   33.20
   6  -7   1  723.93   30.60
   6  -7   1  702.33   33.30
   6  -7   1  731.83   31.70
   6   7   1  724.23   31.50
   6   7   1  663.63   34.30
  -6   7  -1  698.23   31.10
  -6   7  -1  700.03   35.90
   6   7   1  704.63   31.10
  -7  -7  -1  185.78   11.20
   7  -7   1  209.38   15.60
   7  -7   1  208.48   12.80
  -7  -7  -1  159.78   14.80
   7  -7   1  191.08   11.70
   7   7   1  212.78   12.40
  -7   7  -1  186.48   12.00
   7   7   1  178.78   18.10
   7   7   1  188.78   11.70
  -7   7  -1  188.58   18.60
   8  -7   1   22.00    8.30
  -8  -7  -1   13.70    8.70
  -8  -7  -1   22.20    5.30
   8  -7   1   21.00    5.60
   8  -7   1   22.50    6.30
   8   7   1   27.90    6.20
  -8   7  -1   21.70   11.00
  -8   7  -1   24.60    5.70
   8   7   1   19.40    5.50
   8   7   1   18.10    9.40
   9  -7   1 1035.40   44.40
  -9  -7  -1  974.30   43.90
   9  -7   1  977.40   46.70
   9  -7   1 1060.89   44.70
   9   7   1 1000.90   44.20
   9   7   1  976.80   48.30
  -9   7  -1  970.60   48.40
  -9   7  -1 1007.80   44.20
   9   7   1  980.90   44.30
  10  -7   1    3.20    7.00
  10  -7   1   14.20   10.40
  10  -7   1    5.40    6.80
 -10  -7  -1    4.80   10.20
 -10  -7  -1    3.60    5.70
  10   7   1    0.20    7.00
 -10   7  -1    0.60    6.00
  10   7   1  -11.90    5.60
  10   7   1    4.10   11.80
 -10   7  -1   10.20   12.50
  11  -7   1  -10.50    7.50
  11  -7   1   19.40   11.50
 -11  -7  -1    5.90   10.00
  11   7   1    4.40   12.70
  11   7   1   -8.40    6.10
 -11   7  -1   -2.70    7.10
  11   7   1    0.10   11.30
 -11   7  -1  -10.20   13.20
  12  -7   1    8.90   11.90
  12  -7   1    6.00    7.40
 -12  -7  -1    4.90    6.90
 -12  -7  -1    4.50   10.30
  12   7   1    1.30    6.60
 -12   7  -1    7.20   12.40
  12   7   1    9.40   13.50
  12   7   1    5.50    8.50
 -12   7  -1    0.60    6.80
  13  -7   1   78.19   13.90
  13  -7   1   78.69   15.30
  13  -7   1   70.09   11.60
 -13  -7  -1   93.79   12.20
 -13  -7  -1  105.59   15.60
  13   7   1   84.89   14.10
  13   7   1   77.19   12.40
 -13   7  -1   92.39   13.10
  13   7   1   73.59   18.40
 -13   7  -1  118.19   20.90
  14  -7   1   -9.50    9.60
 -14  -7  -1   21.30   12.70
 -14  -7  -1    1.10    7.20
  14  -7   1    8.40   12.70
  14   7   1   -7.50   16.90
 -14   7  -1   30.10   12.60
  14   7   1    9.00    8.90
 -14   7  -1    0.30    7.60
  15  -7   1   44.70   13.10
 -15  -7  -1   39.30    8.90
  15  -7   1   27.70   11.20
 -15  -7  -1   76.49   14.60
  15   7   1   47.90   10.70
  15   7   1   23.80   18.10
 -15   7  -1   52.19    9.80
  16  -7   1    1.80   14.10
 -16   7  -1    6.80    7.90
 -16  -8   1   -3.00    7.20
 -16  -8   1   36.20   13.10
  16  -8  -1   -0.90   13.40
  16   8  -1    9.50    8.90
 -16   8   1    2.20    8.20
  15  -8  -1  -10.00   11.60
 -15  -8   1   28.50   12.70
 -15  -8   1   10.80    7.00
  15  -8  -1   -3.50    9.50
 -15   8   1   13.60    8.30
  15   8  -1   23.30    9.40
 -15   8   1   48.00   15.80
  14  -8  -1   -5.30    9.50
  14  -8  -1    5.40   13.00
 -14  -8   1   10.20    6.50
 -14  -8   1   20.60   10.90
 -14   8   1   37.00   13.20
  14   8  -1   15.00    8.80
 -14   8   1   17.10    8.00
  14   8  -1    1.50    6.10
  14   8  -1   -5.20   18.00
 -13  -8   1   92.59   16.70
  13  -8  -1   63.79   10.90
  13  -8  -1   45.50    9.80
 -13  -8   1   70.09   11.20
  13  -8  -1   61.99   14.50
  13   8  -1   48.60   16.70
  13   8  -1   64.69   10.60
 -13   8   1   96.79   21.10
 -13   8   1   61.19    9.50
  13   8  -1   69.89   11.50
  12  -8  -1   74.89   10.50
  12  -8  -1   83.79   13.80
  12  -8  -1   79.99   13.50
 -12  -8   1   86.79   11.30
 -12  -8   1   86.59   16.00
 -12   8   1   91.69   12.40
  12   8  -1   67.59   12.00
  12   8  -1   61.49    9.40
  12   8  -1   64.29   18.20
 -12   8   1   82.29   17.10
  11  -8  -1  253.17   17.70
  11  -8  -1  232.38   17.10
  11  -8  -1  200.98   20.20
 -11  -8   1  204.88   19.60
 -11  -8   1  225.38   15.40
  11   8  -1  210.18   18.80
  11   8  -1  219.28   15.90
  11   8  -1  227.28   24.20
 -11   8   1  191.08   23.60
 -11   8   1  225.18   16.10
 -10  -8   1  210.08   13.90
  10  -8  -1  202.18   15.60
  10  -8  -1  204.18   18.80
 -10  -8   1  187.38   16.40
  10  -8  -1  214.28   15.60
 -10   8   1  202.58   14.70
 -10   8   1  199.48   20.40
  10   8  -1  209.08   24.60
  10   8  -1  190.18   14.30
  10   8  -1  188.08   14.50
  -9  -8   1  182.18   17.00
   9  -8  -1  171.98   13.80
   9  -8  -1  190.38   16.00
  -9  -8   1  178.38   12.70
   9  -8  -1  202.98   13.80
   9   8  -1  169.88   13.20
  -9   8   1  191.18   12.50
   9   8  -1  186.18   13.20
   9   8  -1  180.88   20.00
   8  -8  -1    2.30    8.80
  -8  -8   1    1.70    4.30
   8  -8  -1    1.40    5.20
  -8  -8   1   -4.00    6.60
   8  -8  -1    4.10    6.20
  -8   8   1    1.50   12.00
   8   8  -1   -6.80    9.30
   8   8  -1    3.40    5.60
  -8   8   1    0.30    5.10
   8   8  -1    0.80    5.80
  -7  -8   1  273.27   17.80
   7  -8  -1  285.47   16.40
  -7  -8   1  284.17   15.50
   7  -8  -1  289.97   15.80
   7  -8  -1  291.27   18.60
  -7   8   1  294.57   15.70
  -7   8   1  281.77   22.70
   7   8  -1  299.77   16.00
   7   8  -1  293.07   21.80
   7   8  -1  300.27   16.30
  -6  -8   1  267.97   17.10
   6  -8  -1  289.77   15.20
   6  -8  -1  279.57   17.10
  -6  -8   1  285.87   15.20
   6  -8  -1  295.57   16.10
   6   8  -1  286.17   21.20
   6   8  -1  290.37   15.90
  -6   8   1  289.07   15.50
   6   8  -1  297.77   15.20
  -6   8   1  307.57   22.70
   5  -8  -1   38.00    7.20
  -5  -8   1   35.90    7.70
   5  -8  -1   55.99    9.60
   5  -8  -1   30.60    6.10
  -5  -8   1   40.50    5.70
  -5   8   1   35.30    5.50
   5   8  -1   36.50    6.10
   5   8  -1   32.70    6.20
   5   8  -1   23.80   10.50
  -4  -8   1   45.30    7.50
  -4  -8   1   38.00    7.00
   4  -8  -1   56.89    8.60
   4  -8  -1   64.89   11.00
  -4   8   1   47.70    6.30
  -4   8   1   50.19    8.10
   4   8  -1   49.50    6.80
   4   8  -1   48.20    6.60
  -3  -8   1  116.69    9.00
   3  -8  -1  119.09    9.00
  -3  -8   1  109.99    9.70
   3  -8  -1  144.99   11.50
   3   8  -1  119.69    9.40
  -3   8   1   99.89    8.40
   3   8  -1  111.09    8.80
  -3   8   1  120.99    9.60
   3   8  -1   94.89   11.90
  -2  -8   1    9.00    4.50
   2  -8  -1   12.20    6.30
  -2  -8   1    3.60    4.40
   2  -8  -1    9.80    4.90
   2   8  -1    2.10    4.60
  -2   8   1    7.60    4.70
   2   8  -1    2.20    5.00
  -2   8   1   23.00    9.40
   1  -8  -1    4.30    4.20
   1  -8  -1   10.40    5.50
  -1  -8   1   14.40    4.20
  -1  -8   1    3.30    4.00
  -1   8   1    5.80    4.50
  -1   8   1    0.80    4.60
   1   8  -1    4.80    4.70
   1   8  -1   -8.60    6.10
  -1   8   1   11.80    8.00
   1   8  -1    6.80    4.50
   0  -8  -1  652.03   29.70
   0  -8  -1  744.43   29.80
   0  -8   1  677.03   29.70
   0   8  -1  728.93   31.00
   0   8   1  640.74   30.40
   0   8  -1  684.53   29.90
   0   8   1  725.03   31.90
   0   8  -1  626.44   30.40
   0   8   1  655.23   29.80
  -1  -8  -1   14.60    4.90
  -1  -8  -1   10.70    4.40
   1  -8   1   15.10    6.00
   1  -8   1    1.70    4.20
  -1   8  -1   19.50    7.10
   1   8   1    6.00    3.70
  -1   8  -1   -2.20    4.50
  -1   8  -1    9.10    4.60
   1   8   1    6.50    4.60
   2  -8   1   -1.70    4.70
   2  -8   1    1.30    6.60
  -2  -8  -1   -0.70    5.10
  -2  -8  -1   -2.90    4.10
   2   8   1   -1.50    4.70
  -2   8  -1   15.20    8.50
  -2   8  -1    0.30    4.70
   2   8   1   -4.00    4.00
   3  -8   1  400.66   20.30
  -3  -8  -1  377.96   19.30
   3  -8   1  396.16   18.40
  -3  -8  -1  379.26   18.20
  -3   8  -1  342.97   17.10
   3   8   1  386.36   18.60
   3   8   1  325.37   20.70
   3   8   1  368.16   17.40
  -3   8  -1  361.76   18.40
  -3   8  -1  433.46   22.60
   4  -8   1   66.89    9.90
  -4  -8  -1   59.29    7.60
  -4  -8  -1   47.10    7.60
   4   8   1   27.90   10.50
  -4   8  -1   45.30    5.30
   4   8   1   51.69    8.50
   4   8   1   48.30    7.00
  -4   8  -1   50.29    6.30
  -5  -8  -1    6.90    7.00
  -5  -8  -1   12.00    4.80
   5  -8   1   20.10    8.20
   5  -8   1   10.80    5.70
   5   8   1    3.60    9.20
  -5   8  -1   14.20   10.80
   5   8   1   17.90    5.20
   5   8   1   14.30    4.90
  -5   8  -1   13.30    5.00
  -6  -8  -1   54.99    9.00
  -6  -8  -1   52.19    7.40
   6  -8   1   46.20    6.40
   6  -8   1   56.59   10.00
   6  -8   1   42.80    6.50
  -6   8  -1   60.89   12.00
   6   8   1   58.19    8.00
   6   8   1   49.60    7.30
   6   8   1   42.60   10.30
  -6   8  -1   73.19    7.30
  -7  -8  -1   82.19    8.30
   7  -8   1   79.99   11.00
   7  -8   1   78.29    7.60
  -7  -8  -1   80.49   11.30
   7  -8   1   85.29    9.30
   7   8   1   58.59   10.60
  -7   8  -1   87.99    8.70
   7   8   1   77.99    8.40
   7   8   1   73.09    8.50
  -7   8  -1   76.89   15.50
   8  -8   1  345.27   18.80
   8  -8   1  354.96   17.40
   8  -8   1  311.97   28.80
  -8  -8  -1  335.77   17.80
  -8  -8  -1  313.17   20.80
   8   8   1  350.16   18.10
   8   8   1  324.87   22.60
  -8   8  -1  346.47   18.20
  -8   8  -1  344.47   23.90
   8   8   1  345.87   18.20
   9  -8   1   16.70    5.90
  -9  -8  -1   23.30    9.60
   9  -8   1   20.00    7.10
   9  -8   1   20.10   10.30
  -9  -8  -1   15.60    5.80
   9   8   1   20.80    6.70
  -9   8  -1   20.90    6.50
   9   8   1   14.70   11.00
  -9   8  -1   21.50   13.70
   9   8   1    8.00    5.70
  10  -8   1   -0.60    7.00
 -10  -8  -1    2.80   10.60
 -10  -8  -1    8.30    6.40
  10  -8   1   10.70    6.50
  10  -8   1   19.80   11.20
  10   8   1   -2.10    6.00
  10   8   1    8.30   12.10
 -10   8  -1   -2.60   12.50
 -10   8  -1   10.70    6.80
  10   8   1    2.80    7.10
 -11  -8  -1   84.69   14.50
  11  -8   1  106.49   13.90
  11  -8   1  111.49   17.40
 -11  -8  -1   98.89   11.80
  11  -8   1   94.59   12.60
  11   8   1   89.49   12.10
  11   8   1   97.79   14.00
  11   8   1   86.29   15.90
 -11   8  -1   85.89   16.20
 -11   8  -1   89.19   12.30
 -12  -8  -1   69.49   11.00
  12  -8   1   51.39    9.40
 -12  -8  -1   63.39   12.60
  12  -8   1   41.10    8.90
  12  -8   1   69.49   13.40
  12   8   1   27.90   14.60
 -12   8  -1   55.59   14.20
  12   8   1   51.69    8.60
 -12   8  -1   64.69    9.90
  12   8   1   61.89   10.20
 -13  -8  -1   92.29   12.00
  13  -8   1   92.19   16.50
  13  -8   1   67.69    9.10
 -13  -8  -1   87.29   15.20
  13  -8   1   92.69   14.50
  13   8   1   90.19   13.70
 -13   8  -1   97.09   13.00
  13   8   1   91.59   19.50
  13   8   1   85.09   11.20
 -13   8  -1  104.49   20.30
 -14  -8  -1   29.10    7.60
  14  -8   1   33.90   13.70
  14  -8   1   13.80    9.40
 -14   8  -1   28.40    8.70
  14   8   1   10.50   17.70
  14   8   1   24.70    9.10
  15  -8   1   17.30   12.20
 -15  -8  -1   38.80   13.30
 -15  -8  -1   13.80    7.20
  15  -8   1   -6.00    8.80
 -15   8  -1    4.20    7.80
  15   8   1    9.40    8.40
  16   8   1    8.60    8.50
 -16  -9   1   -9.70    6.90
  16  -9  -1  -16.50   13.60
 -16  -9   1   26.80   10.10
  16   9  -1    6.70    8.70
 -16   9   1  -11.00    7.90
  15  -9  -1  -10.30    8.80
  15  -9  -1   -1.10   11.50
 -15  -9   1    4.50    7.30
 -15  -9   1   25.40   12.30
  15   9  -1    9.40    8.10
 -15   9   1    0.90    7.80
  14  -9  -1    2.60    8.40
 -14  -9   1   40.20   11.60
 -14  -9   1    5.20    7.00
  14  -9  -1   11.30   13.20
  14   9  -1  -13.70   17.70
 -14   9   1   13.90    7.60
 -14   9   1   27.30   13.00
  14   9  -1   20.60    8.90
 -13  -9   1    4.70   11.50
  13  -9  -1    0.40   12.10
 -13  -9   1    5.50    6.60
  13  -9  -1    7.20    8.30
  13  -9  -1   -8.30    7.50
 -13   9   1   19.10   14.60
  13   9  -1    8.90    6.90
  13   9  -1    1.20   15.20
 -13   9   1    3.70    7.80
  13   9  -1   -1.40    8.40
 -12  -9   1   49.70   13.30
  12  -9  -1   39.20    9.00
  12  -9  -1   27.50   12.00
 -12  -9   1   31.80    7.80
  12   9  -1   32.60    9.20
  12   9  -1   30.80    8.10
 -12   9   1   38.60   15.40
  12   9  -1   36.10   17.40
 -12   9   1   36.30    8.30
  11  -9  -1   21.90   11.10
 -11  -9   1   22.50   10.30
 -11  -9   1   25.80    7.40
  11  -9  -1   22.10    8.30
  11  -9  -1   23.00    7.70
 -11   9   1   18.00   12.80
  11   9  -1   17.90   14.20
  11   9  -1   24.80    8.60
  11   9  -1   11.40    7.20
 -10  -9   1   80.89   10.60
  10  -9  -1   89.59   13.90
  10  -9  -1   85.39   11.50
 -10  -9   1   77.49   14.90
  10  -9  -1   68.69   10.10
  10   9  -1   72.79   11.00
  10   9  -1   78.39   16.60
  10   9  -1   78.89   11.30
 -10   9   1   71.49   11.40
 -10   9   1   74.09   16.20
  -9  -9   1   26.00    6.20
   9  -9  -1   33.50   10.00
   9  -9  -1   21.00    7.50
   9  -9  -1   30.30    6.70
   9   9  -1   11.20    6.30
   9   9  -1   31.00   12.40
  -9   9   1   25.60   13.10
  -9   9   1   35.30    7.20
   9   9  -1   34.90    7.80
  -8  -9   1    6.20    5.20
  -8  -9   1    2.40    8.30
   8  -9  -1    7.00    8.60
   8  -9  -1   12.40    5.30
   8  -9  -1   18.40    6.70
  -8   9   1    6.50    5.60
  -8   9   1    9.10   11.30
   8   9  -1    7.70    6.10
   8   9  -1   13.90    6.30
   8   9  -1    7.90   11.40
   7  -9  -1    3.50    4.40
   7  -9  -1    4.90    5.90
  -7  -9   1   -3.20    6.00
   7  -9  -1    3.90    8.20
  -7  -9   1   -4.20    3.80
   7   9  -1   -9.80    9.60
  -7   9   1    4.10   11.60
  -7   9   1    5.90    5.10
   7   9  -1   -2.50    4.90
   7   9  -1   -3.80    5.10
   6  -9  -1   38.50    7.10
  -6  -9   1   34.20    5.40
   6  -9  -1   34.30    6.30
  -6  -9   1   39.10    7.80
   6  -9  -1   31.90    7.60
   6   9  -1   26.50    9.20
  -6   9   1   31.70   10.90
   6   9  -1   35.60    5.70
  -6   9   1   50.89    7.60
   6   9  -1   42.20    6.40
  -5  -9   1  285.37   16.30
  -5  -9   1  274.07   15.00
   5  -9  -1  294.27   16.70
  -5   9   1  308.87   21.70
   5   9  -1  259.57   18.80
   5   9  -1  294.67   14.90
   5   9  -1  272.67   15.60
  -5   9   1  295.97   15.30
   4  -9  -1   77.69    8.50
  -4  -9   1   69.29    7.80
  -4  -9   1   60.29    8.10
   4  -9  -1   76.19   10.70
  -4   9   1   59.69    6.50
  -4   9   1   82.99   14.90
   4   9  -1   46.90   10.20
   4   9  -1   64.99    8.80
   4   9  -1   57.59    7.40
  -4   9   1   68.89    7.30
  -3  -9   1  100.79    9.10
  -3  -9   1   92.79    8.50
   3  -9  -1   96.49    9.20
  -3   9   1   82.59    7.90
   3   9  -1   87.99   11.90
   3   9  -1   92.39    8.80
  -3   9   1  102.79    8.50
   3   9  -1   98.79    8.70
  -2  -9   1   36.60    6.90
  -2  -9   1   24.30    5.10
   2  -9  -1   28.90    5.80
   2  -9  -1   37.20    7.30
  -2   9   1   40.40   10.10
   2   9  -1   37.10    5.70
  -2   9   1   31.60    5.80
  -2   9   1   20.40    5.40
   2   9  -1   24.30    6.00
   1  -9  -1   54.39    7.80
  -1  -9   1   35.20    5.60
   1  -9  -1   41.90    6.90
  -1   9   1   25.20    5.80
  -1   9   1   40.20    9.40
   1   9  -1   28.90    6.00
   1   9  -1   32.90    5.60
   0  -9  -1    4.30    5.50
   0  -9  -1    2.00    4.30
   0  -9   1   -2.40    4.90
   0   9   1    3.30    5.20
   0   9  -1    2.60    7.50
   0   9  -1   -1.70    4.70
   1  -9   1  710.93   31.40
  -1  -9  -1  751.52   32.20
   1  -9   1  786.92   32.50
  -1  -9  -1  691.33   31.30
   1   9   1  720.13   31.80
  -1   9  -1  773.42   33.60
  -1   9  -1  666.53   31.80
  -1   9  -1  702.93   31.70
   1   9   1  655.33   32.60
  -2  -9  -1   53.69    7.60
   2  -9   1   51.39    8.20
  -2  -9  -1   37.20    5.60
   2  -9   1   50.09    7.80
   2   9   1   49.90    6.50
   2   9   1   44.30    6.20
  -2   9  -1   45.60    6.30
  -2   9  -1   72.89   12.80
   3  -9   1   29.80    5.40
   3  -9   1   36.90    8.00
  -3  -9  -1   23.70    5.30
  -3  -9  -1   32.80    6.40
   3   9   1   20.00    5.70
   3   9   1   26.20    4.80
   3   9   1    6.00   14.00
  -3   9  -1   16.30    4.30
  -3   9  -1   27.30    5.70
  -3   9  -1   48.30   10.20
   4  -9   1   56.89    8.00
  -4  -9  -1   49.80    7.30
  -4  -9  -1   40.50    8.30
   4  -9   1   53.69    8.70
  -4   9  -1   30.50    5.30
   4   9   1   24.20    9.30
  -4   9  -1   53.79   11.60
   4   9   1   41.80    5.40
   4   9   1   40.70    6.20
  -4   9  -1   31.70    5.30
   5  -9   1    8.40    7.50
  -5  -9  -1   -2.00    4.30
   5  -9   1    3.00    5.20
  -5  -9  -1   -4.50    6.00
   5   9   1   -3.80    8.50
  -5   9  -1    8.90   10.60
   5   9   1    0.00    4.50
   5   9   1    2.80    4.10
  -5   9  -1   -0.90    2.60
  -5   9  -1   -1.30    4.40
  -6  -9  -1    4.50    4.60
   6  -9   1    0.80    6.90
   6  -9   1   -3.60    4.90
  -6  -9  -1   -0.10    6.60
   6   9   1    2.90    4.50
  -6   9  -1    6.30   10.50
   6   9   1    0.30    7.70
  -6   9  -1    0.80    4.60
   6   9   1    6.00    4.60
  -7  -9  -1   50.09    7.80
   7  -9   1   54.89    9.40
   7  -9   1   54.09    6.30
   7  -9   1   58.89    9.20
  -7  -9  -1   53.09    9.20
  -7   9  -1   55.29    7.10
   7   9   1   51.89   10.40
   7   9   1   41.20    6.40
  -7   9  -1   53.79   12.00
   7   9   1   56.89    7.50
  -8  -9  -1    0.90    5.10
   8  -9   1    6.00    4.40
   8  -9   1    1.70    6.30
   8  -9   1    4.00    8.50
  -8  -9  -1   11.00    8.70
  -8   9  -1    7.00    5.20
   8   9   1    4.60    5.70
  -8   9  -1    0.30   11.20
   8   9   1   14.40   11.10
   8   9   1   -2.80    5.40
  -9  -9  -1  119.49   11.00
   9  -9   1  131.69   16.50
   9  -9   1  110.79   12.00
  -9  -9  -1  105.69   14.80
   9  -9   1  117.49   10.00
  -9   9  -1  112.59   11.60
   9   9   1  107.69   20.30
   9   9   1  103.29   11.00
   9   9   1  125.39   10.80
 -10  -9  -1  879.41   40.60
  10  -9   1  894.11   39.90
  10  -9   1  873.61   41.00
 -10  -9  -1  887.91   44.10
  10  -9   1  898.91   44.30
 -10   9  -1  869.21   44.70
  10   9   1  934.01   41.00
  10   9   1  861.81   40.70
  10   9   1  917.31   47.60
 -11  -9  -1    8.90   11.10
  11  -9   1    1.50    7.40
  11  -9   1   15.90   12.20
  11  -9   1   -4.90    6.20
 -11  -9  -1   -0.20    6.50
 -11   9  -1   -0.80   11.70
  11   9   1    0.10    8.80
 -11   9  -1    1.40    6.70
  11   9   1   -4.10    6.50
  11   9   1    9.60   13.40
  12  -9   1    7.40    7.00
 -12  -9  -1   15.60    7.20
  12  -9   1    0.10    7.50
  12  -9   1   18.10   12.80
 -12  -9  -1   16.70   10.20
  12   9   1   15.50    8.30
 -12   9  -1   22.20   12.50
 -12   9  -1   13.80    7.60
  12   9   1    5.30    6.70
  12   9   1    7.30   14.10
 -13  -9  -1   32.70   12.50
 -13  -9  -1   14.80    6.80
  13  -9   1    8.00   11.40
  13  -9   1    6.50   11.50
 -13   9  -1   43.40   14.70
 -13   9  -1   17.70    7.70
  13   9   1    6.00   16.60
  13   9   1   12.00    8.10
  13   9   1   18.10    6.40
 -14  -9  -1   20.00    8.10
  14  -9   1   26.30   14.50
 -14  -9  -1   39.20   11.40
  14  -9   1   12.40    8.20
 -14   9  -1   14.60    8.70
  14   9   1   28.20    8.80
 -14   9  -1   46.90   13.30
  14   9   1    4.90   18.90
  15  -9   1   12.60    7.70
 -15  -9  -1   24.80    8.20
  15  -9   1   34.50   13.10
  15   9   1   31.10    8.90
 -15   9  -1   18.50    8.20
  15 -10  -1    3.60   14.00
 -15 -10   1  -11.30    6.60
 -15  10   1   -2.80    8.40
  15  10  -1    4.80    8.10
  14 -10  -1   12.00    8.10
 -14 -10   1    2.00    6.80
  14 -10  -1    8.70   11.80
  14  10  -1   12.60    8.60
 -14  10   1   16.20    7.60
 -14  10   1   40.10   15.40
 -13 -10   1   22.90    7.50
  13 -10  -1    7.50   13.10
  13 -10  -1   12.30    8.10
  13 -10  -1    0.30    7.30
  13  10  -1   16.50    8.30
 -13  10   1   45.80   15.50
 -13  10   1    3.20    7.70
  13  10  -1   11.10    7.20
  13  10  -1    4.90   15.90
 -12 -10   1   31.90    8.10
  12 -10  -1   26.80    8.50
 -12 -10   1   45.00   11.10
  12 -10  -1   24.60   11.70
  12 -10  -1   15.70    8.40
 -12  10   1   43.70   15.50
  12  10  -1   21.80   15.50
  12  10  -1   10.30    6.90
  12  10  -1   26.10    9.00
 -12  10   1   29.60    8.50
 -11 -10   1  206.58   18.90
  11 -10  -1  198.68   15.20
 -11 -10   1  171.08   20.80
  11 -10  -1  203.38   20.50
  11 -10  -1  181.38   16.30
  11  10  -1  191.68   15.40
  11  10  -1  192.88   26.70
 -11  10   1  190.78   23.90
 -11  10   1  213.68   15.80
  11  10  -1  189.68   15.50
  10 -10  -1  131.79   13.90
  10 -10  -1  155.58   18.50
  10 -10  -1  143.39   12.60
 -10 -10   1  137.49   12.70
 -10 -10   1  157.88   16.60
 -10  10   1  139.89   13.60
  10  10  -1  133.29   13.30
  10  10  -1  129.89   13.30
  10  10  -1  151.78   21.40
 -10  10   1  135.19   22.30
  -9 -10   1   18.00   10.50
   9 -10  -1   13.00    7.70
  -9 -10   1    8.70    6.30
   9 -10  -1   13.80    5.90
   9 -10  -1   12.00    9.60
  -9  10   1   18.10    6.70
   9  10  -1    9.60    6.90
  -9  10   1    2.90   12.30
   9  10  -1   16.50   12.20
   9  10  -1   15.00    6.70
  -8 -10   1   -0.40    5.20
  -8 -10   1    3.80    8.30
   8 -10  -1    1.90    8.70
   8 -10  -1    8.20    5.10
   8 -10  -1    3.10    6.40
  -8  10   1    7.10    6.10
   8  10  -1    4.50    6.20
  -8  10   1    9.80   13.20
   8  10  -1    5.60   12.10
   8  10  -1    6.20    6.30
  -7 -10   1   18.30    8.00
   7 -10  -1   17.10    6.20
  -7 -10   1   20.50    5.60
   7 -10  -1   26.40    9.50
  -7  10   1   27.60   12.40
   7  10  -1   16.50    5.80
  -7  10   1   19.20    5.80
   7  10  -1   24.10    6.30
   7  10  -1   16.70   10.00
   6 -10  -1   61.99    9.00
  -6 -10   1   44.90    9.00
   6 -10  -1   46.80    8.40
  -6 -10   1   43.90    7.40
   6  10  -1   57.49    7.40
   6  10  -1   55.19    7.20
  -6  10   1   54.09   12.90
   6  10  -1   47.70   10.80
  -6  10   1   61.39    8.10
   5 -10  -1  243.38   15.80
  -5 -10   1  227.78   13.40
  -5 -10   1  241.38   15.00
   5  10  -1  235.78   14.00
  -5  10   1  246.38   13.70
  -5  10   1  219.58   19.50
   5  10  -1  232.38   18.70
   5  10  -1  243.88   13.10
  -5  10   1  236.78   12.30
  -4 -10   1    2.60    4.30
   4 -10  -1   -1.40    4.70
  -4 -10   1    0.10    5.00
   4 -10  -1    5.00    6.80
  -4  10   1    0.70    3.40
  -4  10   1    3.20    4.70
   4  10  -1   -1.40    5.10
   4  10  -1   -6.60    8.10
  -4  10   1    2.80   10.10
   4  10  -1    4.10    4.50
   3 -10  -1  153.58   10.60
  -3 -10   1  154.68   10.50
  -3 -10   1  140.89   10.20
   3 -10  -1  156.88   12.10
   3  10  -1  152.58    9.60
  -3  10   1  160.58   10.70
   3  10  -1  141.59   10.90
  -3  10   1  175.38   16.60
   3  10  -1  122.99   14.60
  -3  10   1  142.29   10.00
   2 -10  -1    8.30    4.40
  -2 -10   1    8.70    4.40
   2 -10  -1   -4.70    5.90
  -2 -10   1   -0.60    4.30
  -2  10   1    6.60    8.90
  -2  10   1   -6.60    4.60
   2  10  -1   -6.30    4.90
  -2  10   1    0.90    4.70
   2  10  -1   -6.00    6.60
   2  10  -1    6.40    4.60
   1 -10  -1  360.46   18.00
   1 -10  -1  392.76   18.80
  -1 -10   1  353.06   17.80
  -1  10   1  403.16   21.80
  -1  10   1  321.77   18.70
  -1  10   1  371.56   18.20
   1  10  -1  364.76   18.40
   1  10  -1  318.07   19.80
   1  10  -1  374.86   17.60
   0 -10   1   11.10    4.80
   0 -10  -1   11.70    5.10
   0 -10  -1    5.80    5.80
   0  10   1   -0.20    8.50
   0  10  -1   10.60    7.80
   0  10  -1    6.30    5.40
   0  10   1    7.80    5.30
   1 -10   1  151.88   11.70
  -1 -10  -1  169.68   10.80
  -1 -10  -1  162.68   10.60
   1 -10   1  151.18   10.40
   1  10   1  156.38   11.00
  -1  10  -1  141.39   10.20
  -1  10  -1  158.08   13.50
  -2 -10  -1   21.80    4.70
  -2 -10  -1   34.60    7.50
   2 -10   1   21.20    7.20
   2 -10   1   17.20    5.20
  -2  10  -1   29.60    8.80
   2  10   1   25.10    4.50
   2  10   1   21.00    5.00
  -2  10  -1    9.80    5.00
  -2  10  -1   22.20    5.60
   3 -10   1    2.70    6.50
   3 -10   1    3.00    4.60
  -3 -10  -1   -4.10    4.30
  -3 -10  -1    2.20    5.10
   3  10   1    0.70    3.80
  -3  10  -1    2.30    9.10
  -3  10  -1    2.60    4.70
   3  10   1   -5.00    4.60
  -3  10  -1   -3.60    3.70
   4 -10   1  110.49   10.50
   4 -10   1  112.79    9.20
  -4 -10  -1  106.49    9.90
  -4 -10  -1  117.29    8.90
   4  10   1  106.49    8.50
   4  10   1   86.09   12.20
  -4  10  -1   96.19    7.40
  -4  10  -1  117.19   14.60
  -4  10  -1  108.19    9.30
   4  10   1  110.59    7.70
  -5 -10  -1   79.49    7.50
  -5 -10  -1   82.99    9.80
   5 -10   1   91.89   10.30
  -5  10  -1   82.79    6.20
   5  10   1   84.09    7.30
   5  10   1   82.99    8.70
  -5  10  -1   87.69    9.20
  -5  10  -1   81.09   14.90
   5  10   1   67.99   10.90
   6 -10   1    1.70    5.20
   6 -10   1    6.60    8.30
  -6 -10  -1   -1.50    6.40
  -6 -10  -1    2.50    4.30
   6  10   1    3.00    4.40
   6  10   1   -3.10    7.80
   6  10   1   -0.60    4.50
  -6  10  -1    3.60    5.00
  -6  10  -1   -0.90    2.70
  -6  10  -1   -0.50   10.60
   7 -10   1  119.59   11.30
   7 -10   1  133.79   23.00
  -7 -10  -1  128.39   13.30
  -7 -10  -1  124.19   10.30
   7  10   1  123.09    9.90
   7  10   1  118.69   10.50
  -7  10  -1  136.49   11.00
   7  10   1  111.09   15.40
  -7  10  -1  126.49   17.60
   8 -10   1  130.99   14.70
   8 -10   1  140.59   12.90
  -8 -10  -1  131.99   11.20
  -8 -10  -1  131.89   14.60
   8  10   1  126.39   17.30
  -8  10  -1  127.09   18.80
   8  10   1  138.19   11.30
  -8  10  -1  130.69   11.70
   8  10   1  122.29   11.40
  -9 -10  -1    3.00    9.30
   9 -10   1   -4.80   11.00
   9 -10   1   -2.30    6.90
   9 -10   1    0.60    4.50
  -9 -10  -1   -4.30    5.70
  -9  10  -1   -1.40    6.30
  -9  10  -1   -3.80   12.90
   9  10   1   -5.40    6.20
   9  10   1    8.00   11.60
   9  10   1   -0.80    6.30
  10 -10   1    9.20    5.50
  10 -10   1   24.70   12.40
  10 -10   1   12.90    7.80
 -10  10  -1   27.80    7.80
  10  10   1    8.30    6.40
 -10  10  -1   12.40   11.90
  10  10   1   14.20    7.50
  10  10   1   14.20   12.90
 -11 -10  -1   48.60    8.30
  11 -10   1   24.40    8.20
  11 -10   1   55.29   13.80
 -11 -10  -1   52.79   12.80
  11 -10   1   35.80    6.70
 -11  10  -1   42.20    8.60
  11  10   1   35.90   10.10
  11  10   1   42.10   16.40
 -11  10  -1   34.50   12.90
  11  10   1   35.50    7.80
  12 -10   1    8.20   12.90
 -12 -10  -1    5.30    7.10
 -12 -10  -1   17.50   10.20
  12 -10   1   -8.50    7.10
  12 -10   1   -7.00    6.10
 -12  10  -1   10.50    7.30
  12  10   1    5.40    6.90
 -12  10  -1   28.30   12.50
  12  10   1   -0.20    7.80
  12  10   1    2.20   15.80
  13 -10   1    7.70    6.90
  13 -10   1   19.00   12.40
 -13 -10  -1   16.60    7.60
  13  10   1   -0.40   15.00
  13  10   1   20.70    8.40
 -13  10  -1   16.50    8.10
 -13  10  -1   45.70   15.10
  14 -10   1    8.20   12.00
 -14 -10  -1    3.70    7.10
 -14  10  -1   16.50    8.10
 -14  10  -1   49.60   14.80
  14  10   1   16.90    7.90
 -15 -10  -1    0.90    7.00
  15 -10   1    5.20   14.20
 -15  10  -1   -8.30    7.50
  15  10   1   14.20    8.20
  15 -11  -1   14.00   14.80
 -15 -11   1   19.60    7.80
  15  11  -1   25.80    9.10
 -14 -11   1   39.70   11.30
  14 -11  -1    1.20   11.90
 -14  11   1   42.90   15.10
  14  11  -1   25.50    8.70
 -14  11   1    4.50    7.70
  13 -11  -1   20.20   13.60
 -13 -11   1   21.20    7.60
 -13  11   1   48.00   15.70
 -13  11   1   32.30    9.10
  13  11  -1   41.30    9.40
  13  11  -1   28.60    6.80
  13  11  -1   -4.90   18.10
 -12 -11   1    8.10    6.70
  12 -11  -1  -15.20    7.50
  12 -11  -1   -0.50   12.40
  12 -11  -1    6.30    6.50
  12  11  -1    6.00    7.40
 -12  11   1    4.30   14.00
 -12  11   1    7.40    7.80
  12  11  -1    3.00    8.00
  12  11  -1   -6.60   14.40
  11 -11  -1    0.80   12.10
 -11 -11   1    1.50    7.10
  11 -11  -1    7.80    6.30
  11 -11  -1    6.70    8.30
 -11 -11   1   10.60    9.10
  11  11  -1   -1.60    7.00
  11  11  -1   18.90    8.10
  11  11  -1   14.70   15.40
 -11  11   1   12.50   14.50
 -11  11   1    7.50    7.60
 -10 -11   1   86.09   11.40
 -10 -11   1   97.99   14.70
  10 -11  -1   80.69   13.10
  10 -11  -1   89.69   10.50
  10 -11  -1  105.79   15.60
  10  11  -1   85.59   11.80
 -10  11   1   86.39   17.00
 -10  11   1   99.79   14.80
  10  11  -1   79.69   16.10
  10  11  -1  105.79   12.20
   9 -11  -1   16.60   10.30
   9 -11  -1   16.70    6.00
  -9 -11   1   18.50    6.80
   9 -11  -1   37.00    8.50
  -9 -11   1   26.30   10.00
   9  11  -1   26.60   13.00
  -9  11   1   32.10    7.60
   9  11  -1   25.60    7.70
   9  11  -1   25.30    7.60
  -9  11   1   32.80   13.50
   8 -11  -1  277.07   19.50
   8 -11  -1  283.17   17.60
  -8 -11   1  279.67   16.40
  -8 -11   1  279.77   19.00
   8  11  -1  284.07   16.30
   8  11  -1  285.87   17.20
   8  11  -1  250.37   22.60
  -8  11   1  263.67   25.20
  -8  11   1  294.57   17.20
  -7 -11   1  729.13   35.20
   7 -11  -1  750.22   34.00
   7 -11  -1  614.44   42.70
  -7 -11   1  728.33   33.40
   7  11  -1  719.83   33.80
  -7  11   1  730.13   31.90
   7  11  -1  711.73   38.60
   7  11  -1  761.22   33.30
  -7  11   1  732.83   39.30
  -7  11   1  780.02   33.80
   6 -11  -1  163.18   14.80
   6 -11  -1  163.08   12.50
  -6 -11   1  165.18   12.80
  -6 -11   1  167.98   11.40
   6  11  -1  160.78   12.10
  -6  11   1  173.48   11.80
  -6  11   1  170.08   19.60
   6  11  -1  162.08   16.40
   6  11  -1  169.78   11.10
  -6  11   1  157.58   10.00
  -5 -11   1    6.70    4.50
   5 -11  -1   -4.70    7.40
  -5 -11   1    0.20    5.20
   5 -11  -1    2.90    5.40
   5  11  -1   -1.20    5.10
  -5  11   1    1.70   10.70
  -5  11   1    6.90    5.10
   5  11  -1    6.00    4.60
  -5  11   1    0.70    3.50
   5  11  -1   -0.50    8.80
   4 -11  -1   46.60    8.10
   4 -11  -1   31.00    5.40
  -4 -11   1   49.50    7.10
  -4 -11   1   49.50    7.90
   4  11  -1   50.29    8.00
  -4  11   1   50.29    7.70
   4  11  -1   54.49    6.60
  -4  11   1   45.80   10.90
  -4  11   1   36.20    6.40
   4  11  -1   38.30    9.30
   3 -11  -1   52.39    7.90
  -3 -11   1   43.10    7.10
  -3 -11   1   54.99    7.20
   3 -11  -1   36.90    5.70
   3  11  -1   49.60    8.20
   3  11  -1   44.10    9.00
   3  11  -1   59.39    6.50
  -3  11   1   39.60    7.20
  -3  11   1   49.70    7.70
  -3  11   1   53.39   10.30
   2 -11  -1   47.90    7.30
  -2 -11   1   42.60    6.60
   2 -11  -1   42.80    7.10
  -2 -11   1   39.30    6.10
   2  11  -1   41.10    6.30
   2  11  -1   21.40    8.10
  -2  11   1   42.90    9.90
   2  11  -1   28.70    5.60
  -2  11   1   38.40    5.80
  -2  11   1   30.60    5.70
  -1 -11   1  134.49    9.50
   1 -11  -1  132.59    9.70
   1 -11  -1  137.79   10.50
   1  11  -1  124.29    9.10
   1  11  -1  136.99   10.30
   1  11  -1  116.49   11.90
  -1  11   1  114.29   10.30
  -1  11   1  133.59    9.90
  -1  11   1  132.39   14.00
   0 -11  -1   70.39    7.40
   0 -11   1   71.29    8.00
   0 -11  -1   77.49    8.30
   0 -11   1   76.39    8.60
   0  11   1   56.99    9.50
   0  11   1   64.09    8.20
   0  11  -1   86.59   11.40
   0  11  -1   72.19    8.60
   0  11   1   66.79   12.20
  -1 -11  -1  244.08   13.40
   1 -11   1  236.38   13.30
   1 -11   1  254.47   15.00
   1  11   1  246.48   13.80
   1  11   1  184.88   21.20
  -1  11  -1  220.78   14.10
  -1  11  -1  250.97   13.80
  -1  11  -1  264.17   16.50
  -2 -11  -1  117.19    9.70
   2 -11   1  114.09   11.40
   2 -11   1  120.69    9.10
  -2 -11  -1  122.49    8.50
   2  11   1   92.39   10.90
  -2  11  -1  104.69    9.50
  -2  11  -1  110.99   12.90
   2  11   1  114.89    7.70
   2  11   1  109.59    9.50
   3 -11   1   18.20    7.10
  -3 -11  -1   19.30    5.50
   3 -11   1   12.60    5.10
  -3 -11  -1   14.60    4.30
  -3  11  -1    6.60    8.90
  -3  11  -1   15.90    4.30
   3  11   1   12.60    4.00
  -3  11  -1   19.40    5.20
   3  11   1    4.60    4.50
   3  11   1   14.80    7.60
   4 -11   1   -2.70    6.80
   4 -11   1    1.70    4.70
  -4 -11  -1    4.10    5.20
  -4 -11  -1   -4.30    4.10
   4  11   1   -0.20    3.70
  -4  11  -1   -0.30    3.40
  -4  11  -1    0.10    4.50
   4  11   1    1.00    4.70
  -4  11  -1   -2.40    9.00
   4  11   1   -8.90    7.60
  -5 -11  -1  141.69   11.80
  -5 -11  -1  142.39   10.40
   5 -11   1  160.28   13.80
   5  11   1  153.38   10.80
   5  11   1  145.69   16.10
  -5  11  -1  140.49    8.70
   5  11   1  145.69    9.40
  -5  11  -1  135.49   16.60
  -5  11  -1  158.88   11.00
  -6 -11  -1   56.99    8.20
   6 -11   1   65.09   11.10
  -6 -11  -1   53.29   10.00
   6 -11   1   46.50    7.00
  -6  11  -1   59.39   12.80
   6  11   1   53.89   10.40
  -6  11  -1   45.50    6.70
  -6  11  -1   64.59    5.80
   6  11   1   57.69    8.80
   6  11   1   64.69    7.50
   7 -11   1  144.09   14.30
  -7 -11  -1  135.99   13.70
  -7 -11  -1  125.99   11.00
   7 -11   1  150.18   12.30
  -7  11  -1  141.59   18.90
   7  11   1  152.08   11.70
  -7  11  -1  148.99   11.90
   7  11   1  113.89   16.60
  -7  11  -1  139.09    8.20
   7  11   1  138.29   10.10
   8 -11   1   36.00    8.00
  -8 -11  -1   31.70    6.50
   8 -11   1   42.10   11.80
   8  11   1   32.70   11.80
   8  11   1   25.90    6.70
  -8  11  -1   38.00    5.40
  -8  11  -1   36.90   13.30
  -8  11  -1   57.39    8.80
   8  11   1   47.00    7.20
  -9 -11  -1   51.89   10.60
   9 -11   1   41.80   11.50
  -9 -11  -1   63.89   10.10
   9 -11   1   30.10    8.40
   9  11   1   47.80   14.60
   9  11   1   34.70    7.50
  -9  11  -1   38.50    9.10
   9  11   1   55.09    9.30
  -9  11  -1   57.99   14.60
 -10 -11  -1    0.60   10.10
 -10 -11  -1   -0.40    6.50
  10 -11   1    2.30   10.70
 -10  11  -1    6.30   12.60
  10  11   1    8.20    7.10
 -10  11  -1    8.80    7.50
  10  11   1    9.60   14.50
  10  11   1    3.20    6.90
  11 -11   1  148.89   14.50
  11 -11   1  124.29   10.60
  11 -11   1  140.79   17.60
 -11 -11  -1  129.19   15.10
 -11 -11  -1  133.99   13.30
  11  11   1  138.39   15.00
  11  11   1  117.59   21.70
 -11  11  -1  134.29   13.90
  11  11   1  150.68   13.30
 -11  11  -1  162.58   20.90
  12 -11   1  188.78   19.60
  12 -11   1  199.48   13.30
 -12 -11  -1  203.08   19.70
  12 -11   1  182.98   15.50
 -12 -11  -1  215.18   15.80
  12  11   1  193.58   15.60
 -12  11  -1  209.78   16.40
  12  11   1  171.68   14.30
  12  11   1  201.18   28.10
 -12  11  -1  229.28   23.10
  13 -11   1   60.19    9.10
 -13 -11  -1   83.99   16.00
  13 -11   1   67.59   15.90
 -13 -11  -1   62.09    9.60
 -13  11  -1   50.09    9.30
  13  11   1   46.60   19.10
  13  11   1   75.89   11.90
 -14 -11  -1   37.80   12.30
 -14 -11  -1   23.90    7.50
  14 -11   1   22.30   13.10
 -14  11  -1   14.90    8.60
  14  11   1   31.80    9.00
  15 -11   1   -6.30   13.80
 -15 -11  -1    6.60    7.60
  15  11   1   10.90    7.90
  15 -12  -1    3.00   12.60
 -15 -12   1    8.10    7.90
  15  12  -1   24.40    8.50
 -14 -12   1   11.00    6.90
  14 -12  -1    2.60   14.10
 -14  12   1   18.20    9.00
 -14  12   1   28.20   14.30
  14  12  -1   22.20    8.60
  13 -12  -1   64.49   15.90
 -13 -12   1   91.49   15.30
 -13 -12   1   64.89    9.70
  13 -12  -1   72.69    9.80
 -13  12   1  117.19   20.80
  13  12  -1   66.69   10.50
 -13  12   1   91.59   13.40
  12 -12  -1   34.70    6.50
  12 -12  -1   21.90   13.50
 -12 -12   1   34.40   12.00
 -12 -12   1   22.60    7.30
 -12  12   1   40.00   15.10
 -12  12   1   25.80    8.20
  12  12  -1   33.60    8.50
  12  12  -1   31.50    8.00
  12  12  -1   22.70   17.20
  11 -12  -1    4.70   10.80
  11 -12  -1   -2.30    7.80
 -11 -12   1   -5.50    6.30
  11 -12  -1   -8.80    5.10
 -11 -12   1    7.50   10.10
  11  12  -1   -7.30   15.40
 -11  12   1    3.20   14.10
  11  12  -1   -1.70    7.20
  11  12  -1  -12.00    6.90
 -11  12   1   -3.50    6.90
 -10 -12   1   15.50   10.20
  10 -12  -1   32.90   12.90
 -10 -12   1   12.80    7.10
  10 -12  -1   18.80    8.90
 -10  12   1   17.60    8.00
  10  12  -1   13.80   13.80
 -10  12   1   18.20   14.80
  10  12  -1   27.70    7.90
  10  12  -1   19.40    7.90
  -9 -12   1  132.49   15.40
   9 -12  -1  143.59   18.20
  -9 -12   1  129.99   12.30
   9 -12  -1  125.59   13.90
  -9  12   1  139.69   13.70
  -9  12   1  144.79   22.60
   9  12  -1  119.79   12.90
   9  12  -1  148.09   23.20
   9  12  -1  138.69   12.20
   8 -12  -1    4.70   10.80
  -8 -12   1   -9.90    5.50
  -8 -12   1   -0.20    8.40
   8 -12  -1  -12.60    6.80
  -8  12   1   -2.00    3.80
   8  12  -1  -11.80    5.90
  -8  12   1  -11.90    5.90
   8  12  -1   -4.00   11.00
   8  12  -1   -4.60    6.00
  -7 -12   1  190.88   16.00
  -7 -12   1  178.68   13.10
   7 -12  -1  190.08   17.30
   7 -12  -1  198.68   14.30
  -7  12   1  193.48   13.10
   7  12  -1  188.88   12.70
   7  12  -1  170.88   21.00
   7  12  -1  194.78   13.20
  -7  12   1  195.18   22.30
  -7  12   1  193.18   11.30
   6 -12  -1  691.63   34.20
  -6 -12   1  693.23   33.20
  -6 -12   1  717.03   32.00
  -6  12   1  692.63   38.90
   6  12  -1  690.93   31.50
   6  12  -1  690.43   32.30
  -6  12   1  723.53   32.20
   6  12  -1  668.63   35.70
  -6  12   1  666.13   30.50
   5 -12  -1   56.59    9.60
  -5 -12   1   49.50    8.30
   5 -12  -1   43.00    6.50
  -5 -12   1   48.40    6.40
   5  12  -1   47.30    7.00
   5  12  -1   52.69   11.10
   5  12  -1   50.39    7.50
  -5  12   1   48.90    7.00
  -5  12   1   42.10   12.80
  -5  12   1   48.60    7.00
   4 -12  -1   18.50    4.90
   4 -12  -1    5.30    7.00
  -4 -12   1   11.30    5.30
  -4 -12   1   12.70    4.70
   4  12  -1    9.70    4.70
   4  12  -1    1.30    4.60
   4  12  -1    8.80    8.40
  -4  12   1   10.00    5.10
  -4  12   1    3.60   10.60
  -4  12   1   11.20    4.30
   3 -12  -1   77.39    8.50
  -3 -12   1   69.39    7.60
   3 -12  -1   55.39    9.50
  -3 -12   1   57.09    7.50
   3  12  -1   51.89    8.30
  -3  12   1   58.49   12.90
  -3  12   1   67.19    7.60
   3  12  -1   56.89    7.10
  -3  12   1   61.89    8.10
   3  12  -1   53.89   10.80
   2 -12  -1  480.15   22.70
  -2 -12   1  464.55   21.60
  -2 -12   1  455.45   21.70
   2 -12  -1  450.75   21.60
  -2  12   1  426.76   21.80
   2  12  -1  430.76   23.90
  -2  12   1  452.15   21.70
  -2  12   1  456.05   25.30
   2  12  -1  446.96   22.00
   2  12  -1  443.36   21.00
  -1 -12   1   27.30    5.10
   1 -12  -1   24.40    5.00
   1 -12  -1   32.50    6.50
  -1  12   1   28.90    5.60
   1  12  -1   28.90    8.00
   1  12  -1   25.40    8.40
  -1  12   1   23.80    5.90
   1  12  -1   20.00    5.50
  -1  12   1   24.60    8.80
   0 -12  -1  109.09    9.20
   0 -12   1  119.19   10.20
   0 -12  -1  126.89    9.50
   0 -12   1   98.09    9.00
   0  12   1   98.49    9.30
   0  12  -1  112.69   12.20
   0  12  -1   95.49    9.50
   0  12  -1  107.99   11.20
   0  12   1  114.19   13.20
   1 -12   1  786.72   33.60
   1 -12   1  724.03   32.50
  -1 -12  -1  811.22   32.70
  -1 -12  -1  720.73   32.50
   1  12   1  664.93   33.90
  -1  12  -1  714.83   32.80
  -1  12  -1  765.22   34.60
  -1  12  -1  687.43   32.90
   1  12   1  699.33   32.40
   2 -12   1   39.10    7.70
  -2 -12  -1   34.50    5.50
  -2 -12  -1   40.30    7.60
   2 -12   1   32.50    5.50
  -2  12  -1   36.50    8.90
  -2  12  -1   39.50    7.40
   2  12   1   39.30    6.10
   2  12   1   34.90    7.60
  -2  12  -1   29.80    5.30
   3 -12   1  170.38   11.40
  -3 -12  -1  171.98   11.30
  -3 -12  -1  181.28   11.90
   3 -12   1  183.38   13.50
   3  12   1  177.78   10.20
  -3  12  -1  172.18   16.00
  -3  12  -1  179.98   11.80
  -3  12  -1  178.78   11.00
   3  12   1  167.98   15.20
   3  12   1  183.38   11.80
   4 -12   1  500.05   23.70
  -4 -12  -1  497.95   24.60
   4 -12   1  508.15   25.50
  -4 -12  -1  500.15   23.60
  -4  12  -1  492.55   22.60
  -4  12  -1  500.85   27.90
   4  12   1  483.95   26.50
   4  12   1  482.35   23.50
  -4  12  -1  493.65   24.00
   4  12   1  495.55   22.50
   5 -12   1  126.09   11.30
  -5 -12  -1  130.49   11.70
  -5 -12  -1  117.59   10.20
   5 -12   1  142.29   14.00
  -5  12  -1  123.09   16.90
   5  12   1  144.09   15.00
  -5  12  -1  148.69    8.90
   5  12   1  139.49    9.20
  -5  12  -1  133.59   11.00
   5  12   1  139.09   10.90
   6 -12   1   28.30   14.80
   6 -12   1   12.00    6.00
  -6 -12  -1   13.20    5.60
  -6 -12  -1    9.70    7.10
  -6  12  -1   16.00    3.80
   6  12   1    9.20    9.30
   6  12   1   11.00    5.10
   6  12   1    8.60    5.90
  -6  12  -1    8.10    5.40
  -6  12  -1    8.70   12.40
   7 -12   1  296.27   17.60
  -7 -12  -1  287.97   19.00
  -7 -12  -1  286.67   16.70
   7 -12   1  302.27   21.00
  -7  12  -1  275.27   24.80
   7  12   1  296.37   15.90
   7  12   1  294.17   17.00
  -7  12  -1  278.67   13.90
  -7  12  -1  284.57   17.30
   7  12   1  278.47   22.00
   8 -12   1  197.98   15.20
  -8 -12  -1  182.58   13.90
   8 -12   1  192.38   18.90
  -8 -12  -1  203.28   17.00
  -8  12  -1  201.78   10.60
   8  12   1  193.58   22.50
   8  12   1  204.88   12.90
  -8  12  -1  201.58   14.90
  -8  12  -1  213.18   21.40
   8  12   1  189.48   14.20
   9 -12   1   24.10   12.40
   9 -12   1    4.70    7.60
  -9 -12  -1   12.50    8.10
  -9 -12  -1   18.90   10.10
   9  12   1   16.80    7.00
   9  12   1   24.00   14.10
  -9  12  -1   17.90    3.80
  -9  12  -1   14.30    7.50
  -9  12  -1   21.10   13.80
   9  12   1   13.90    6.90
  10 -12   1   90.59   12.80
 -10 -12  -1   98.09   12.00
 -10 -12  -1  113.69   15.50
  10 -12   1  115.79   18.40
  10  12   1  111.29   11.00
  10  12   1   88.39   11.90
 -10  12  -1  109.99    7.80
 -10  12  -1  110.29   19.60
  10  12   1  105.69   20.30
 -10  12  -1  107.59   12.90
  11 -12   1   -4.60    7.50
 -11 -12  -1   14.90   10.80
  11 -12   1   12.00   12.80
 -11 -12  -1   15.50    7.30
  11  12   1   12.50    7.10
  11  12   1   11.20    8.50
 -11  12  -1   18.30    8.00
 -11  12  -1   37.20   14.00
  11  12   1   10.40   14.00
  12 -12   1   17.50   13.70
 -12 -12  -1   25.10    7.20
 -12 -12  -1   28.40   11.50
  12  12   1    8.30    6.10
  12  12   1    9.90    7.70
 -12  12  -1   12.90    8.50
  12  12   1    2.50   16.80
  13 -12   1  100.49   16.60
 -13 -12  -1  160.58   17.90
 -13 -12  -1  115.19   13.10
  13  12   1  140.19   13.20
 -13  12  -1   98.69   14.60
 -13  12  -1  160.18   21.20
  14 -12   1   -5.20   13.90
 -14 -12  -1   17.70   11.10
  14  12   1   17.00    8.00
 -15  12  -1   15.20    9.00
  15  12   1   30.20    8.80
 -14 -13   1   73.29   13.00
  14  13  -1   78.79   11.80
 -14  13   1   93.39   20.40
 -13 -13   1   33.80   11.60
  13 -13  -1   12.40   12.70
 -13 -13   1   20.20    7.60
 -13  13   1   23.40    9.10
 -13  13   1   54.19   15.40
  12 -13  -1   16.50   13.50
  12 -13  -1  -12.30    7.20
 -12 -13   1   12.50    7.40
 -12 -13   1    6.90   10.30
  12  13  -1    1.10   20.30
  12  13  -1    7.30    6.80
 -12  13   1   26.90   14.60
  12  13  -1   19.40    7.90
 -12  13   1    7.90    8.10
  11 -13  -1    9.90    8.30
 -11 -13   1   21.30    6.70
  11 -13  -1   28.90   13.60
 -11 -13   1   32.50   10.80
  11  13  -1   36.90    8.40
  11  13  -1   29.00    8.20
 -11  13   1   38.00   15.30
 -11  13   1   26.10    8.50
  11  13  -1   20.50   14.80
  10 -13  -1   96.99   16.00
  10 -13  -1   81.89   13.40
 -10 -13   1   92.39   13.90
 -10 -13   1  110.49   14.80
 -10  13   1  126.69   22.10
 -10  13   1  121.39    9.20
  10  13  -1  111.99   11.40
  10  13  -1  104.19   18.40
  10  13  -1   79.99   12.40
 -10  13   1  101.69   13.20
   9 -13  -1   -7.80    7.80
   9 -13  -1    5.80   11.70
  -9 -13   1    9.60    8.90
  -9 -13   1    6.40    6.30
  -9  13   1   10.00    4.50
  -9  13   1    1.10    8.00
   9  13  -1    1.80   14.30
  -9  13   1    7.30   14.70
   9  13  -1   -4.80    6.70
   9  13  -1    9.30    6.80
  -8 -13   1  166.08   13.40
   8 -13  -1  171.28   15.00
   8 -13  -1  163.98   18.40
   8  13  -1  189.48   13.30
  -8  13   1  176.18   14.50
  -8  13   1  181.88   23.40
   8  13  -1  175.78   14.00
  -8  13   1  178.98   11.20
   8  13  -1  173.18   20.70
   7 -13  -1  121.89   12.80
   7 -13  -1  132.79   16.10
  -7 -13   1  105.79   12.40
  -7 -13   1  104.69   11.00
   7  13  -1  119.69   10.30
   7  13  -1  109.89   20.10
   7  13  -1  111.99   11.70
  -7  13   1  122.09    9.00
  -7  13   1  110.19   11.90
  -7  13   1  124.19   23.30
  -6 -13   1   15.00    5.90
  -6 -13   1   24.50    7.30
  -6  13   1   14.80   13.90
   6  13  -1   27.70    6.30
  -6  13   1   19.60    5.00
   6  13  -1   12.90   10.40
  -6  13   1   23.70    6.60
   6  13  -1   18.30    6.10
  -5 -13   1  214.98   14.00
   5 -13  -1  197.68   13.30
  -5 -13   1  206.08   13.20
   5 -13  -1  219.38   16.50
   5  13  -1  207.98   12.50
   5  13  -1  204.28   14.10
  -5  13   1  201.38   20.60
  -5  13   1  215.78   14.10
   5  13  -1  205.28   19.80
  -5  13   1  201.08   12.20
   4 -13  -1  277.97   15.80
   4 -13  -1  268.07   17.40
  -4 -13   1  269.07   14.80
  -4 -13   1  271.07   15.70
  -4  13   1  267.87   22.10
   4  13  -1  268.37   15.80
   4  13  -1  255.57   19.90
  -4  13   1  271.17   15.60
  -4  13   1  270.27   14.90
   4  13  -1  257.77   14.50
  -3 -13   1   95.59    9.30
   3 -13  -1  118.29   12.60
   3 -13  -1  130.89   12.40
  -3 -13   1  101.99    9.20
  -3  13   1  107.59    9.90
  -3  13   1  103.89    9.40
   3  13  -1  105.19   14.30
  -3  13   1  121.89   16.30
   3  13  -1  104.19   10.10
   3  13  -1  104.29    8.50
  -2 -13   1  171.28   11.30
   2 -13  -1  169.88   11.50
  -2 -13   1  166.98   11.20
   2 -13  -1  191.68   13.00
  -2  13   1  172.18   16.70
   2  13  -1  164.68   12.00
   2  13  -1  169.68   10.60
  -2  13   1  163.88   12.10
  -2  13   1  157.48   11.50
   2  13  -1  162.38   14.80
   1 -13  -1  471.35   21.60
  -1 -13   1  411.96   20.80
   1 -13  -1  399.26   20.40
  -1  13   1  445.96   24.60
   1  13  -1  412.56   21.10
   1  13  -1  461.75   23.50
  -1  13   1  413.96   21.00
   1  13  -1  391.66   22.50
   0 -13  -1  371.36   19.00
   0 -13  -1  392.56   19.10
   0 -13   1  397.86   19.80
   0 -13   1  361.56   18.80
   0  13  -1  388.86   21.20
   0  13   1  356.96   20.00
   0  13  -1  357.86   19.10
   0  13   1  360.76   18.60
   0  13   1  392.96   22.50
  -1 -13  -1  142.39   10.20
   1 -13   1  138.09   10.20
   1 -13   1  159.08   12.20
  -1 -13  -1  146.59   10.30
  -1  13  -1  138.29   13.50
  -1  13  -1  133.39   10.70
   1  13   1  131.89   10.60
   1  13   1  157.98   14.90
  -1  13  -1  133.89   10.90
   1  13   1  113.59   12.40
  -2 -13  -1  169.78   11.30
   2 -13   1  169.18   13.50
  -2 -13  -1  167.18   11.80
   2 -13   1  163.68   11.30
   2  13   1  165.98   11.80
   2  13   1  170.28   14.60
  -2  13  -1  171.68   15.90
  -2  13  -1  162.98   12.00
  -2  13  -1  160.58   11.70
   3 -13   1   69.49   11.00
  -3 -13  -1   58.79    8.00
   3 -13   1   72.19    8.90
  -3 -13  -1   67.39    8.30
   3  13   1   69.79    8.80
  -3  13  -1   65.99   14.10
  -3  13  -1   65.29    8.90
   3  13   1   70.49   13.30
  -3  13  -1   76.39    8.50
   3  13   1   61.79    6.60
   4 -13   1   -2.90    8.00
   4 -13   1    3.70    5.50
  -4 -13  -1    3.90    5.20
  -4 -13  -1    0.10    5.50
  -4  13  -1    4.50    4.40
   4  13   1    0.70    9.20
   4  13   1   -2.50    4.10
   4  13   1   -5.40    5.10
  -4  13  -1    1.20   10.70
  -4  13  -1    4.00    5.30
   5 -13   1  236.58   15.10
  -5 -13  -1  230.18   14.30
  -5 -13  -1  231.68   16.30
   5 -13   1  236.78   17.70
  -5  13  -1  239.38   15.00
   5  13   1  238.58   13.00
  -5  13  -1  223.48   21.90
   5  13   1  234.78   20.40
   5  13   1  241.28   14.70
  -5  13  -1  249.58   13.10
   6 -13   1  903.11   41.20
  -6 -13  -1  787.02   37.80
   6 -13   1  846.72   38.50
  -6 -13  -1  854.11   40.00
   6  13   1  853.41   38.40
  -6  13  -1  858.11   38.60
  -6  13  -1  807.72   42.50
   6  13   1  852.11   37.20
  -6  13  -1  868.91   36.40
   6  13   1  807.02   42.60
   7 -13   1   53.29   12.40
   7 -13   1   41.60    8.10
  -7 -13  -1   45.30    7.50
  -7 -13  -1   46.60   10.00
   7  13   1   44.00    7.50
   7  13   1   45.90    7.90
  -7  13  -1   47.00    7.90
  -7  13  -1   58.69    6.60
   7  13   1   48.50   12.20
  -7  13  -1   47.20   14.00
  -8 -13  -1   68.89   13.00
   8 -13   1   55.99    9.30
   8 -13   1   84.69   14.20
  -8 -13  -1   51.29    7.90
   8  13   1   65.99    8.60
  -8  13  -1   66.09    6.40
   8  13   1   51.69    8.40
   8  13   1   43.00   13.00
   9 -13   1  485.95   29.60
  -9 -13  -1  436.26   25.20
  -9 -13  -1  487.25   28.20
   9 -13   1  486.55   25.40
  -9  13  -1  476.65   30.90
  -9  13  -1  475.55   21.30
   9  13   1  488.85   33.00
   9  13   1  474.05   25.10
   9  13   1  483.05   23.60
  -9  13  -1  468.75   24.80
  10 -13   1   -0.80    7.80
 -10 -13  -1   14.60    6.80
  10 -13   1    9.10   12.90
 -10 -13  -1   20.00   10.50
 -10  13  -1   15.70    8.10
 -10  13  -1   20.70   12.90
  10  13   1   17.30    7.00
  10  13   1   18.20   13.50
  10  13   1   21.70    7.10
 -11 -13  -1   88.39   11.80
  11 -13   1   99.19   16.30
 -11 -13  -1  118.89   15.90
  11  13   1  102.49   12.10
 -11  13  -1  132.49   19.70
  11  13   1   86.49   12.80
  11  13   1   90.09   18.70
 -11  13  -1  106.59   13.60
 -11  13  -1  126.19    7.90
 -12 -13  -1  224.58   17.00
  12 -13   1  217.28   21.50
 -12 -13  -1  249.58   20.90
  12  13   1  189.28   30.70
 -12  13  -1  227.38   18.10
 -12  13  -1  290.37   24.50
  12  13   1  267.87   16.90
 -13 -13  -1   79.29   14.70
 -13  13  -1   98.89   19.20
  13  13   1   59.49   10.70
 -14 -13  -1   73.09   14.00
  14 -14  -1    3.90   12.80
 -14 -14   1   28.50    8.60
 -14  14   1    7.40    8.90
  13 -14  -1   26.80   15.40
  13  14  -1   61.19   10.80
 -13  14   1   94.59   20.50
  12 -14  -1   68.39   14.70
 -12 -14   1   78.89   11.60
  12  14  -1  104.99   11.40
 -12  14   1   80.89   13.60
 -12  14   1  118.59   20.70
  11 -14  -1   29.40   13.60
 -11 -14   1   42.40   11.80
 -11 -14   1   30.10    7.80
 -11  14   1   31.30   14.20
  11  14  -1   20.10   15.00
 -11  14   1   35.80    8.70
  11  14  -1   28.60    7.80
  11  14  -1   37.20    8.30
  10 -14  -1   46.20   12.60
 -10 -14   1   81.29   13.40
 -10 -14   1   72.69   10.70
  10 -14  -1   64.29   10.20
  10  14  -1   52.29   16.70
 -10  14   1   55.69    9.20
  10  14  -1   59.59    9.00
  10  14  -1   78.89   10.40
 -10  14   1   54.49   16.40
  -9 -14   1  476.65   27.70
   9 -14  -1  521.45   26.80
   9 -14  -1  485.85   30.00
  -9 -14   1  462.85   26.00
   9  14  -1  466.55   33.90
  -9  14   1  488.85   33.30
   9  14  -1  484.95   26.10
   9  14  -1  507.85   25.10
  -9  14   1  484.25   26.10
  -9  14   1  519.45   23.10
   8 -14  -1   30.90   12.40
  -8 -14   1   40.50    9.60
  -8 -14   1   26.30    7.20
   8 -14  -1   16.20    8.00
  -8  14   1   23.60   15.80
   8  14  -1   18.20    7.50
   8  14  -1   16.70   12.50
   8  14  -1   33.50    7.20
  -8  14   1   49.10    7.60
  -8  14   1   36.10    8.40
   7 -14  -1   64.69    9.20
   7 -14  -1   65.79   12.50
  -7 -14   1   48.20    7.50
  -7 -14   1   56.19   11.90
  -7  14   1   61.09    8.10
   7  14  -1   47.90    8.70
   7  14  -1   63.59    8.60
  -7  14   1   46.80    8.00
   7  14  -1   45.40   13.10
  -7  14   1   58.39   21.90
  -6 -14   1  344.07   19.40
  -6 -14   1  361.26   21.20
   6 -14  -1  372.36   22.80
   6  14  -1  364.36   19.00
   6  14  -1  356.16   26.40
  -6  14   1  373.16   18.30
  -6  14   1  371.16   20.30
   6  14  -1  352.76   20.10
  -6  14   1  366.36   27.60
  -5 -14   1   97.69   11.00
   5 -14  -1  102.39   14.30
  -5 -14   1  100.59    9.60
   5 -14  -1   92.69   11.50
  -5  14   1  120.29   11.30
  -5  14   1  116.29   19.10
  -5  14   1  113.89   10.10
   5  14  -1  111.49    9.80
   5  14  -1  109.69   11.40
   5  14  -1  106.99   15.90
   4 -14  -1  233.78   16.80
   4 -14  -1  215.08   14.60
  -4 -14   1  228.18   14.50
  -4 -14   1  226.28   14.10
  -4  14   1  229.68   14.10
  -4  14   1  239.58   22.30
   4  14  -1  230.88   13.80
  -4  14   1  232.58   14.10
   4  14  -1  209.78   19.70
   4  14  -1  225.48   15.00
   3 -14  -1  815.52   36.20
  -3 -14   1  774.52   35.30
   3 -14  -1  774.72   35.20
  -3 -14   1  740.93   34.80
  -3  14   1  793.62   38.80
   3  14  -1  765.72   35.50
   3  14  -1  728.53   37.90
   3  14  -1  767.82   34.40
  -3  14   1  746.33   35.10
  -3  14   1  796.42   35.30
   2 -14  -1    1.10    6.80
   2 -14  -1    3.90    5.60
  -2 -14   1    4.20    5.10
  -2  14   1   15.10    9.70
  -2  14   1    1.10    5.70
  -2  14   1    1.90   10.40
   2  14  -1    0.40    5.40
   2  14  -1    5.70    7.90
   1 -14  -1   84.49   10.50
   1 -14  -1   77.39    9.10
  -1 -14   1   82.99    9.30
  -1 -14   1  100.99   10.40
  -1  14   1   87.09   10.40
   1  14  -1   84.89   13.10
   1  14  -1   74.89   12.40
   1  14  -1   79.49    9.90
  -1  14   1   71.49    9.50
  -1  14   1   94.39   15.00
   0 -14   1  272.07   15.20
   0 -14   1  322.17   17.20
   0 -14  -1  277.57   15.90
   0 -14  -1  317.27   16.30
   0  14   1  280.27   20.10
   0  14  -1  259.97   17.80
   0  14  -1  270.17   16.20
   0  14   1  272.77   16.10
   0  14   1  262.17   17.20
   0  14  -1  290.97   19.20
  -1 -14  -1  135.59   10.50
  -1 -14  -1  102.69   10.00
   1 -14   1  106.29   10.00
   1 -14   1  111.59   11.10
   1  14   1  100.39   10.30
   1  14   1  110.59   12.80
  -1  14  -1  109.59   14.70
   1  14   1  132.39   14.90
  -1  14  -1   99.79   10.40
  -1  14  -1   97.89   15.90
   2 -14   1  204.48   14.70
  -2 -14  -1  172.88   12.10
   2 -14   1  170.78   12.10
   2  14   1  151.48   15.60
  -2  14  -1  185.08   12.70
   2  14   1  156.68   12.40
  -2  14  -1  168.08   16.30
  -2  14  -1  173.08   12.60
   3 -14   1   58.39    9.00
  -3 -14  -1   49.10    8.40
  -3 -14  -1   43.00    6.70
   3 -14   1   53.99    9.50
   3  14   1   59.39    9.20
  -3  14  -1   44.20   11.60
  -3  14  -1   54.69    9.00
   3  14   1   48.00   10.70
   3  14   1   42.00    6.60
  -3  14  -1   49.00    7.40
   4 -14   1  595.54   28.40
   4 -14   1  672.53   31.40
  -4 -14  -1  588.34   29.50
  -4 -14  -1  584.14   28.40
   4  14   1  611.44   28.70
   4  14   1  577.84   32.50
  -4  14  -1  611.34   33.20
  -4  14  -1  597.64   28.40
  -4  14  -1  581.84   27.50
   4  14   1  588.34   27.10
   5 -14   1  387.66   31.10
  -5 -14  -1  396.26   22.10
  -5 -14  -1  378.96   20.50
   5 -14   1  368.96   20.90
   5  14   1  396.26   19.10
   5  14   1  383.06   24.70
  -5  14  -1  379.46   27.20
  -5  14  -1  402.76   19.00
  -5  14  -1  385.76   20.90
   5  14   1  398.66   20.90
  -6 -14  -1   34.10    8.60
  -6 -14  -1   25.80    6.60
   6 -14   1   29.90   10.50
   6  14   1   28.40    7.40
  -6  14  -1   25.20   14.00
   6  14   1   35.50   11.40
  -6  14  -1   27.00    7.70
  -6  14  -1   45.60    7.10
   6  14   1   30.10    5.90
   7 -14   1  521.55   29.60
  -7 -14  -1  497.55   25.50
   7 -14   1  505.35   26.30
   7  14   1  498.25   32.20
  -7  14  -1  474.95   26.60
   7  14   1  497.95   25.70
  -7  14  -1  521.95   33.00
   7  14   1  514.05   24.40
  -7  14  -1  535.05   23.00
   8 -14   1  658.83   32.50
   8 -14   1  663.93   34.90
  -8 -14  -1  681.03   34.70
  -8 -14  -1  571.84   36.30
   8  14   1  638.74   37.10
   8  14   1  680.43   32.40
  -8  14  -1  630.74   37.20
  -8  14  -1  727.53   28.90
   8  14   1  673.23   30.60
  -8  14  -1  679.13   32.70
  -9 -14  -1    2.10    9.00
  -9 -14  -1    5.70    6.50
   9 -14   1  -12.30    7.40
   9 -14   1    0.90   12.00
   9  14   1   21.30   14.30
  -9  14  -1    0.80   14.00
   9  14   1    3.60    6.60
  -9  14  -1    3.00    7.00
   9  14   1   10.00    6.40
  10 -14   1   70.19   15.00
  10 -14   1   80.99   12.40
 -10 -14  -1   75.09   11.40
 -10 -14  -1   91.49   14.40
 -10  14  -1  102.19   19.30
  10  14   1  110.09   12.20
  10  14   1  101.29   20.10
  10  14   1  112.19   10.80
 -10  14  -1  100.79   13.20
  11 -14   1  197.28   20.20
 -11 -14  -1  224.58   19.40
 -11 -14  -1  191.18   15.40
  11  14   1  195.98   19.30
  11  14   1  193.88   27.80
  11  14   1  233.78   15.30
 -11  14  -1  192.48   16.80
 -11  14  -1  229.58   22.50
 -12 -14  -1   31.60   10.50
  12 -14   1    5.70   13.40
 -12 -14  -1    8.20    6.50
 -12  14  -1   -4.40    7.80
  12  14   1   13.70    7.10
 -12  14  -1   35.00   13.40
  13 -14   1   35.00   16.30
  13  14   1   81.19   10.70
 -14 -14  -1  182.48   17.30
 -14  14  -1  162.68   21.00
  14  14   1  144.99   13.80
  13 -15  -1  -18.10   13.80
 -13 -15   1    2.50    7.10
 -13  15   1    0.50    8.00
 -13  15   1   41.30   14.90
  13  15  -1   31.30    7.80
 -12  15   1   17.70   13.90
  12  15  -1   22.90    7.70
 -11 -15   1   91.29   14.10
  11 -15  -1   88.29   16.10
 -11 -15   1   77.49   11.20
 -11  15   1   70.99   16.80
  11  15  -1   75.59   10.50
 -11  15   1   82.79   13.10
  11  15  -1   86.79   10.70
 -10 -15   1   -5.30    6.30
  10 -15  -1   -6.70   11.90
  10 -15  -1  -12.70    7.40
 -10 -15   1    6.00    8.90
  10  15  -1    4.50    7.70
  10  15  -1   -0.80   15.30
  10  15  -1   -4.60    6.60
 -10  15   1   -9.80    6.80
 -10  15   1   10.20   15.00
  -9 -15   1    8.40    8.40
   9 -15  -1   -5.90    7.70
   9 -15  -1   -1.10   11.60
  -9 -15   1    0.30    7.20
  -9  15   1   18.20   15.40
   9  15  -1    9.70    6.60
   9  15  -1    1.70    7.10
   9  15  -1    1.60   14.30
  -9  15   1    7.30    6.50
   8 -15  -1  270.17   18.90
  -8 -15   1  265.37   19.00
  -8 -15   1  266.17   17.00
   8 -15  -1  267.47   22.30
  -8  15   1  327.77   15.70
   8  15  -1  268.97   18.00
   8  15  -1  288.37   16.80
   8  15  -1  280.17   26.70
  -8  15   1  252.87   26.40
  -7 -15   1  253.37   17.10
  -7 -15   1  242.68   15.70
   7 -15  -1  268.97   17.40
   7 -15  -1  238.18   20.40
  -7  15   1  226.38   25.50
  -7  15   1  261.77   14.30
   7  15  -1  211.38   16.40
   7  15  -1  237.58   15.00
  -7  15   1  260.87   17.10
   7  15  -1  226.88   22.20
  -6 -15   1    4.10    6.80
   6 -15  -1   -7.90    9.80
  -6 -15   1    3.30    5.90
   6  15  -1    5.10    5.70
   6  15  -1    1.30   10.70
  -6  15   1    8.80    5.50
  -6  15   1    3.90    6.90
   6  15  -1  -10.70    6.10
  -6  15   1   -0.60   14.40
  -5 -15   1  206.68   14.30
  -5 -15   1  221.78   15.00
   5 -15  -1  200.78   15.30
   5 -15  -1  188.68   27.40
  -5  15   1  212.48   24.40
   5  15  -1  234.48   22.00
  -5  15   1  239.18   14.10
   5  15  -1  222.38   15.40
  -5  15   1  223.48   15.30
   5  15  -1  222.88   13.80
  -4 -15   1  476.65   24.20
   4 -15  -1  517.25   27.10
  -4 -15   1  489.35   24.60
   4 -15  -1  492.85   24.80
   4  15  -1  487.15   24.90
   4  15  -1  495.45   23.60
  -4  15   1  475.05   24.40
  -4  15   1  482.55   24.20
   4  15  -1  457.45   29.00
  -4  15   1  502.85   30.00
   3 -15  -1   -4.30    6.10
  -3 -15   1    5.60    5.40
  -3 -15   1    1.90    5.50
   3 -15  -1    0.10    8.40
   3  15  -1  -10.90    9.10
  -3  15   1    4.00    7.50
   3  15  -1    3.80    5.70
   3  15  -1    1.10    5.30
  -3  15   1    7.30    5.60
  -3  15   1   -6.10   12.00
   2 -15  -1  144.09   12.00
   2 -15  -1  160.08   13.90
  -2 -15   1  141.09   11.70
   2  15  -1  154.08   12.50
  -2  15   1  153.38   18.60
   2  15  -1  155.88   17.50
  -2  15   1  140.19   13.00
  -2  15   1  159.88   12.30
  -1 -15   1   63.29    9.40
   1 -15  -1   57.99    9.40
   1 -15  -1   65.49   10.60
  -1 -15   1   72.29   10.50
  -1  15   1   67.99   12.90
   1  15  -1   68.09   13.30
  -1  15   1   68.59   10.80
  -1  15   1   49.30    7.60
   1  15  -1   68.79   13.10
   1  15  -1   63.89   10.20
   0 -15  -1   41.00    7.70
   0 -15   1   35.50    6.50
   0 -15   1   33.80    8.30
   0 -15  -1   36.10    6.90
   0  15  -1   27.20    6.60
   0  15   1   37.30    8.40
   0  15   1   34.90   11.40
   0  15  -1   28.00    8.30
   0  15   1   31.60    6.90
   0  15  -1   31.30   10.30
   1 -15   1    8.70    7.90
  -1 -15  -1   11.50    6.00
  -1 -15  -1    2.60    6.50
   1 -15   1   -1.10    5.80
  -1  15  -1    3.40    5.50
   1  15   1   10.30    6.10
  -1  15  -1    5.90   10.10
  -1  15  -1    5.00    7.10
   1  15   1    3.00   10.00
   1  15   1   15.60    8.40
   2 -15   1    5.20    5.30
   2 -15   1   16.20    8.40
  -2 -15  -1   15.50    6.50
  -2 -15  -1   15.00    6.00
  -2  15  -1    6.60    5.60
   2  15   1    8.50    6.50
   2  15   1   19.70    8.20
  -2  15  -1   25.10   10.90
   3 -15   1  780.22   35.80
  -3 -15  -1  761.72   36.20
   3 -15   1  806.82   37.50
  -3 -15  -1  777.72   35.80
  -3  15  -1  801.02   40.00
   3  15   1  766.12   39.20
  -3  15  -1  779.32   36.10
  -3  15  -1  777.92   35.60
   3  15   1  783.82   36.00
  -4 -15  -1   61.09   10.30
  -4 -15  -1   57.29    9.50
   4 -15   1   59.89    8.40
   4 -15   1   68.29   13.70
   4  15   1   63.29   12.50
   4  15   1   61.39    7.30
   4  15   1   62.59   10.30
  -4  15  -1   62.49   10.50
  -4  15  -1   66.49   14.30
   5 -15   1  225.18   16.30
  -5 -15  -1  247.58   15.70
   5 -15   1  258.77   19.40
  -5 -15  -1  259.17   16.50
   5  15   1  239.28   20.40
  -5  15  -1  247.18   16.30
  -5  15  -1  253.57   23.90
   5  15   1  234.78   16.00
   5  15   1  256.87   14.10
  -5  15  -1  275.77   14.80
  -6 -15  -1  578.24   29.40
  -6 -15  -1  514.85   27.20
   6 -15   1  572.64   30.80
  -6  15  -1  543.45   27.90
   6  15   1  540.15   33.30
  -6  15  -1  576.04   25.40
  -6  15  -1  535.25   33.90
   6  15   1  558.84   27.60
   6  15   1  546.05   25.70
  -7 -15  -1   48.40    7.60
   7 -15   1   50.99   12.60
   7 -15   1   40.40    8.90
  -7 -15  -1   62.59   11.90
   7  15   1   50.79   13.10
   7  15   1   57.19    8.50
  -7  15  -1   44.30    8.70
   7  15   1   42.90    8.30
  -7  15  -1   52.69   15.60
  -8 -15  -1  242.68   16.60
   8 -15   1  252.27   18.60
  -8 -15  -1  273.87   19.50
   8 -15   1  269.47   22.20
   8  15   1  270.67   15.30
  -8  15  -1  270.47   26.20
   8  15   1  244.28   25.60
   8  15   1  256.67   17.30
  -8  15  -1  267.17   18.20
   9 -15   1  228.18   22.60
  -9 -15  -1  262.07   19.40
  -9 -15  -1  236.28   16.50
   9 -15   1  236.18   17.40
   9  15   1  260.97   15.30
  -9  15  -1  247.28   17.50
   9  15   1  235.58   23.80
   9  15   1  257.07   16.70
  -9  15  -1  230.48   25.30
 -10 -15  -1    1.00    6.30
  10 -15   1   11.40   13.20
 -10 -15  -1   24.70   10.30
  10 -15   1   -9.70    6.70
  10  15   1   11.80   15.20
 -10  15  -1   10.20    7.90
 -10  15  -1   30.60   13.40
  10  15   1    9.70    6.40
 -11 -15  -1   73.29   14.20
  11 -15   1   34.70   13.20
 -11 -15  -1   70.59   11.10
 -11  15  -1   57.19   10.30
  11  15   1   82.89   14.90
 -11  15  -1  103.09   18.90
 -12 -15  -1   69.69   11.70
 -12 -15  -1  104.99   14.40
  12 -15   1   64.49   17.10
 -12  15  -1   83.49   13.40
 -13 -15  -1  129.49   15.80
 -13  15  -1  174.58   21.10
  13  15   1  151.88   12.60
 -12 -16   1   49.20    8.90
  12 -16  -1   24.60   13.20
 -12  16   1   32.10    9.50
 -11 -16   1   -5.00    6.00
  11 -16  -1   -1.00   13.30
  11  16  -1   19.40    7.10
 -11  16   1   -6.80    7.40
 -11  16   1   21.60   15.30
 -10 -16   1   26.50    8.20
 -10 -16   1   48.40   10.50
  10 -16  -1   41.80   12.70
  10 -16  -1   14.20    7.40
  10  16  -1   27.00    7.30
 -10  16   1   32.70    8.80
 -10  16   1   32.90   15.70
  10  16  -1   27.10   17.70
  -9 -16   1  156.98   13.50
   9 -16  -1  163.48   19.70
   9 -16  -1  128.99   16.00
  -9 -16   1  164.78   15.40
   9  16  -1  199.78   13.10
   9  16  -1  151.18   22.30
   9  16  -1  154.48   14.30
  -9  16   1  164.78   15.00
  -9  16   1  156.18   23.40
   8 -16  -1  138.19   18.60
   8 -16  -1  131.99   15.30
  -8 -16   1  138.29   14.50
  -8 -16   1  142.99   15.20
   8  16  -1  147.49   13.80
  -8  16   1  165.18   14.10
   8  16  -1  122.89   23.00
  -8  16   1  118.19   23.00
   8  16  -1  142.49   11.60
   7 -16  -1   75.79   13.90
   7 -16  -1   77.29   10.40
  -7 -16   1   77.79   10.50
  -7  16   1   74.49   11.30
   7  16  -1   63.79    9.30
  -7  16   1   52.09   17.70
   7  16  -1   84.09   15.90
   7  16  -1   92.39    9.90
  -6 -16   1  234.58   15.70
   6 -16  -1  257.47   20.10
  -6 -16   1  236.18   17.00
  -6  16   1  239.18   16.90
  -6  16   1  281.37   15.70
   6  16  -1  239.88   16.60
   6  16  -1  234.08   24.00
   6  16  -1  249.48   15.10
  -6  16   1  217.08   27.20
   5 -16  -1   -7.60    9.70
  -5 -16   1    5.30    5.70
   5 -16  -1   -4.30    6.80
  -5 -16   1    2.20    6.10
  -5  16   1    8.70    6.60
  -5  16   1   10.70    6.80
  -5  16   1    7.70   15.10
   5  16  -1   -7.00   11.60
   5  16  -1    0.50    5.70
   5  16  -1    5.00    7.10
  -4 -16   1  109.79   11.30
  -4 -16   1  100.79   10.90
   4 -16  -1  116.09   12.30
   4 -16  -1  118.09   18.30
  -4  16   1  111.29   11.90
  -4  16   1  110.99   13.30
  -4  16   1  107.39   21.10
   4  16  -1   97.29   11.80
   4  16  -1  109.39    9.90
   4  16  -1  111.39   18.30
  -3 -16   1  342.57   19.10
   3 -16  -1  340.97   19.70
   3 -16  -1  371.36   21.90
   3  16  -1  323.87   23.60
  -3  16   1  341.67   19.60
   3  16  -1  328.97   19.70
  -3  16   1  344.07   19.60
  -3  16   1  344.77   26.30
  -2 -16   1  155.68   13.70
  -2 -16   1  131.19   11.80
   2 -16  -1  141.29   12.20
   2 -16  -1  122.49   14.00
  -2  16   1  117.09   20.30
   2  16  -1  155.88   17.10
   2  16  -1  139.69   16.80
   2  16  -1  124.19   12.80
  -2  16   1  143.29   13.80
  -2  16   1  149.09   12.50
  -1 -16   1   29.40    8.60
   1 -16  -1   33.00    7.10
   1 -16  -1   35.60    9.10
  -1 -16   1   62.99    9.60
  -1  16   1   41.10    7.30
   1  16  -1   30.30   10.20
   1  16  -1   36.50   11.30
  -1  16   1   37.40    9.10
   1  16  -1   30.10    7.50
  -1  16   1   23.30   12.80
   0 -16   1  443.76   22.60
   0 -16  -1  470.85   23.10
   0 -16  -1  416.36   22.00
   0 -16   1  449.06   23.80
   0  16  -1  439.56   25.90
   0  16   1  462.55   27.70
   0  16   1  435.76   22.90
   0  16   1  420.06   24.50
   0  16  -1  421.56   23.10
   0  16  -1  426.66   25.40
  -1 -16  -1  547.45   27.30
  -1 -16  -1  590.44   27.50
   1 -16   1  539.75   27.20
   1 -16   1  592.34   28.90
  -1  16  -1  535.15   28.50
   1  16   1  579.14   31.90
   1  16   1  529.25   30.20
  -1  16  -1  527.75   27.50
   1  16   1  550.24   27.50
  -1  16  -1  562.74   31.30
   2 -16   1  220.38   14.80
  -2 -16  -1  235.28   14.60
  -2 -16  -1  217.68   14.50
   2 -16   1  224.18   17.40
   2  16   1  204.48   15.00
   2  16   1  195.28   18.80
  -2  16  -1  209.08   16.50
   2  16   1  232.88   20.50
  -2  16  -1  200.58   20.50
  -2  16  -1  208.28   15.10
   3 -16   1   49.00    8.20
  -3 -16  -1   61.79    9.90
  -3 -16  -1   52.39    9.80
   3 -16   1   43.10   10.80
   3  16   1   39.70   11.50
   3  16   1   44.20    8.30
  -3  16  -1   44.50    8.10
  -3  16  -1   30.20   13.00
  -4 -16  -1  445.96   24.30
  -4 -16  -1  488.15   25.50
   4 -16   1  507.95   27.30
   4 -16   1  495.15   25.00
  -4  16  -1  493.05   24.30
  -4  16  -1  488.45   25.40
   4  16   1  474.95   29.60
  -4  16  -1  484.85   30.40
   4  16   1  480.85   25.10
   5 -16   1  189.78   15.20
  -5 -16  -1  203.18   14.30
   5 -16   1  198.18   18.20
  -5 -16  -1  185.78   14.60
   5  16   1  192.28   14.70
  -5  16  -1  200.68   23.00
   5  16   1  193.78   21.40
   5  16   1  211.38   12.60
  -5  16  -1  200.28   15.20
  -5  16  -1  229.88   14.00
  -6 -16  -1   17.50    6.60
   6 -16   1   -4.30   10.40
  -6  16  -1    0.80   14.20
   6  16   1    3.20    6.50
   6  16   1   14.00   11.30
  -6  16  -1    2.20    8.60
   6  16   1   14.00    5.60
  -6  16  -1   24.30    5.80
   7 -16   1  495.65   29.30
   7 -16   1  461.95   25.30
  -7 -16  -1  409.36   26.70
  -7 -16  -1  458.65   26.90
   7  16   1  487.25   25.30
   7  16   1  475.45   23.30
   7  16   1  471.65   32.10
  -7  16  -1  541.65   22.80
  -7  16  -1  465.35   25.70
  -8 -16  -1  206.78   17.20
   8 -16   1  187.68   16.60
  -8 -16  -1  202.98   14.60
   8 -16   1  185.68   20.60
  -8  16  -1  186.58   24.40
   8  16   1  201.48   15.00
  -8  16  -1  196.18   14.90
   8  16   1  210.08   22.20
   8  16   1  221.58   13.50
   9 -16   1   10.40    7.50
  -9 -16  -1   25.80    9.90
  -9 -16  -1   19.40    7.30
   9 -16   1   19.10   13.40
   9  16   1   19.10   13.30
   9  16   1   34.10    6.70
  -9  16  -1   19.40    8.10
  -9  16  -1   24.20   14.50
   9  16   1   28.30    7.40
 -10 -16  -1   16.70    6.90
  10 -16   1    7.30   13.80
 -10 -16  -1   26.80    9.90
 -10  16  -1   43.00   14.00
 -10  16  -1   42.90    9.10
  10  16   1   33.10    6.90
 -11 -16  -1  105.09   12.30
  11 -16   1   78.79   15.70
 -11  16  -1  120.19   14.10
  12 -16   1    9.30   14.90
 -12 -16  -1   16.60    7.50
 -12  16  -1   10.80    8.60
  12 -17  -1   -7.50   14.00
 -12 -17   1   34.70    8.00
 -12  17   1   23.80    9.50
 -12  17   1   63.49   16.00
  11 -17  -1  159.48   22.10
 -11 -17   1  152.18   14.20
 -11 -17   1  194.28   16.60
 -11  17   1  151.78   16.10
 -11  17   1  218.08   27.00
  10 -17  -1   -7.70   12.40
 -10 -17   1   13.90    7.90
 -10 -17   1    8.20    6.30
 -10  17   1  -18.30   14.30
 -10  17   1    2.00    7.70
  10  17  -1    4.50    7.60
  -9 -17   1    7.50    6.20
   9 -17  -1   -6.40    7.20
  -9 -17   1   14.90    7.80
   9 -17  -1   -3.10   12.10
   9  17  -1    4.80    7.30
  -9  17   1   10.50   16.00
   9  17  -1    2.60   13.00
  -9  17   1    4.50    7.70
   8 -17  -1  245.58   22.10
  -8 -17   1  242.98   16.30
  -8 -17   1  258.57   18.20
   8 -17  -1  224.28   17.90
   8  17  -1  193.88   23.40
  -8  17   1  266.27   18.00
   8  17  -1  267.67   15.60
   8  17  -1  263.27   17.30
  -8  17   1  226.28   26.00
   7 -17  -1   51.89   13.00
  -7 -17   1   65.59   10.20
   7 -17  -1   84.19   12.50
  -7 -17   1   66.79   10.20
  -7  17   1   64.09    9.50
   7  17  -1   55.49   13.70
   7  17  -1   65.99    9.20
   7  17  -1   46.50    8.60
  -7  17   1   41.10   18.10
   6 -17  -1  111.09   16.10
   6 -17  -1   74.69   10.70
  -6 -17   1  103.59   11.70
  -6 -17   1  114.09   11.30
  -6  17   1  104.29   12.70
   6  17  -1  102.99   17.90
  -6  17   1   78.09   22.70
   6  17  -1   92.59   10.40
   6  17  -1  110.79   12.50
   5 -17  -1  251.67   20.50
  -5 -17   1  235.38   15.20
   5 -17  -1  230.48   16.50
  -5 -17   1  211.38   15.30
   5  17  -1  230.98   16.00
  -5  17   1  219.58   16.00
  -5  17   1  243.18   17.80
   5  17  -1  208.48   14.00
  -5  17   1  192.38   25.70
   5  17  -1  218.68   22.20
   4 -17  -1   51.29    8.40
  -4 -17   1   45.20    7.40
   4 -17  -1   47.90   11.00
  -4 -17   1   40.50    8.90
   4  17  -1   34.80    7.10
   4  17  -1   44.10   12.40
  -4  17   1   53.39    8.40
  -4  17   1   31.10   15.60
   4  17  -1   40.20    8.00
   3 -17  -1   -8.30    9.30
  -3 -17   1   16.60    6.70
   3 -17  -1    3.10    6.80
  -3  17   1   -2.70   13.70
   3  17  -1    4.10    7.30
  -3  17   1   13.00    7.50
  -3  17   1   -3.10    6.30
   3  17  -1    8.10   10.80
  -2 -17   1    2.30    7.90
   2 -17  -1   -5.60    8.80
   2 -17  -1    5.80    6.70
  -2 -17   1    8.50    6.30
  -2  17   1    8.30    6.90
   2  17  -1    6.10   10.70
   2  17  -1   12.10    6.70
  -2  17   1   19.30    8.20
  -2  17   1  -11.60   12.80
   2  17  -1    6.30   10.10
   1 -17  -1  125.39   13.70
  -1 -17   1  151.68   14.50
   1 -17  -1  140.69   12.30
  -1 -17   1  139.49   12.50
   1  17  -1  126.99   11.80
   1  17  -1  155.88   16.70
   1  17  -1  121.39   17.30
  -1  17   1   99.99   19.50
  -1  17   1  160.28   15.60
  -1  17   1  139.79   12.60
   0 -17  -1   54.09    9.70
   0 -17   1   51.79   10.30
   0 -17   1   43.30    7.30
   0 -17  -1   52.89    8.00
   0  17  -1   46.70   12.70
   0  17   1   38.60   13.40
   0  17   1   55.69   10.40
   0  17   1   35.20    7.10
   0  17  -1   44.70    8.10
   0  17  -1   76.59   14.80
  -1 -17  -1  195.48   15.30
   1 -17   1  188.58   14.50
   1 -17   1  209.68   16.90
  -1 -17  -1  201.58   14.50
   1  17   1  181.58   14.60
  -1  17  -1  193.78   20.40
   1  17   1  201.38   20.50
  -1  17  -1  207.18   15.40
  -1  17  -1  213.08   17.50
   1  17   1  193.08   18.00
   2 -17   1  492.25   26.00
   2 -17   1  457.95   24.40
  -2 -17  -1  530.65   24.90
  -2 -17  -1  436.96   23.70
  -2  17  -1  442.86   24.70
   2  17   1  503.95   30.10
  -2  17  -1  501.65   26.10
  -2  17  -1  448.86   29.50
   2  17   1  455.25   24.50
   2  17   1  485.65   28.50
  -3 -17  -1   26.90    6.90
   3 -17   1   31.60   13.00
   3 -17   1   25.30    7.20
  -3 -17  -1   36.80    8.00
  -3  17  -1   22.50   13.60
   3  17   1   35.20    8.20
   3  17   1   34.30   11.70
  -3  17  -1   31.90    7.70
  -4 -17  -1   26.20    7.60
   4 -17   1   22.40   10.90
  -4 -17  -1   30.10    7.20
   4 -17   1   14.20    7.40
   4  17   1   24.40    7.30
   4  17   1   32.30   12.50
  -4  17  -1   20.30   13.80
  -4  17  -1   27.40    7.80
  -5 -17  -1   28.40    7.00
   5 -17   1   12.50    7.50
  -5 -17  -1   18.50    7.20
   5 -17   1   21.30   10.80
   5  17   1   28.70    7.10
  -5  17  -1   24.70    9.80
  -5  17  -1    4.50   14.70
   5  17   1   16.00   12.40
   5  17   1   19.80    5.80
  -6 -17  -1   75.49   11.70
   6 -17   1   59.39   13.20
   6  17   1   60.39   13.20
  -6  17  -1   45.50   15.40
   6  17   1   60.69    8.80
  -6  17  -1   51.79    8.90
   6  17   1   64.19    8.60
  -7 -17  -1    8.20    7.70
   7 -17   1    3.20    7.40
  -7 -17  -1   10.80    6.30
   7 -17   1   -1.00   11.60
  -7  17  -1   28.70    7.70
  -7  17  -1   -8.70   14.10
   7  17   1    8.80    6.40
   7  17   1    2.00    5.60
   7  17   1    0.50   11.50
   8 -17   1   68.49   11.70
   8 -17   1   63.99   14.80
  -8 -17  -1  100.79   13.90
  -8 -17  -1   83.69   10.90
  -8  17  -1   94.59   12.70
   8  17   1   99.79   11.20
   8  17   1   75.89   16.60
  -8  17  -1   73.69   15.60
   8  17   1  105.79    9.60
  -9 -17  -1   82.89   10.90
  -9 -17  -1   79.09   13.80
   9 -17   1   63.69   15.30
  -9  17  -1   57.29    9.50
   9  17   1   77.79    8.90
   9  17   1   72.49   19.40
   9  17   1   93.89   11.00
  -9  17  -1   62.79   16.70
 -10 -17  -1  112.19   15.60
 -10 -17  -1   79.39   11.50
  10  17   1  128.69   10.40
 -10  17  -1  109.59   18.90
  11 -17   1  -24.10   13.30
 -11 -17  -1    5.80    6.70
 -11  17  -1   36.20   14.50
 -11  17  -1    9.60    8.30
 -11 -18   1   98.79   11.80
  11  18  -1  120.49   10.40
 -11  18   1  101.39   20.90
  10 -18  -1  134.89   21.50
 -10 -18   1  180.58   14.70
 -10 -18   1  226.58   16.80
 -10  18   1  162.98   16.80
  10  18  -1  221.68   17.30
 -10  18   1  198.58   28.80
  -9 -18   1   32.00    8.30
  -9 -18   1   19.10    7.00
   9 -18  -1  -11.10   12.60
   9  18  -1   23.80    6.60
   9  18  -1   19.30    6.60
  -9  18   1    6.60   16.40
  -9  18   1    5.20    7.50
  -8 -18   1   27.70    7.00
   8 -18  -1   14.90    7.80
   8 -18  -1   10.40   12.60
  -8 -18   1   32.60    8.30
  -8  18   1   13.00   17.10
  -8  18   1   37.30    8.80
   8  18  -1   50.29    8.50
   8  18  -1   22.00   15.30
   8  18  -1   29.80    8.20
   7 -18  -1   21.50    8.20
  -7 -18   1   22.10    7.50
  -7  18   1  -11.40   16.30
  -7  18   1   20.80    7.60
   7  18  -1   30.40    8.00
   7  18  -1   23.20    6.70
   7  18  -1   21.40   13.90
  -6 -18   1   20.20    6.80
   6 -18  -1   -6.50    8.20
   6 -18  -1   13.50   11.70
   6  18  -1   17.80    6.70
   6  18  -1    8.70    7.20
   6  18  -1   20.20   12.70
  -6  18   1  -14.50   16.40
  -6  18   1   17.60    7.60
   5 -18  -1  -14.80   10.20
  -5 -18   1   15.10    6.30
   5 -18  -1   -5.10    7.10
  -5 -18   1   -2.30    5.70
   5  18  -1    8.30   10.40
   5  18  -1   -4.40    5.90
   5  18  -1   -2.00    7.10
  -5  18   1    6.30    6.60
  -4 -18   1   11.90    6.50
   4 -18  -1   -7.50    9.90
   4 -18  -1  -10.40    6.50
  -4  18   1  -17.30   14.40
  -4  18   1   -4.70    6.50
   4  18  -1    1.30    6.90
   4  18  -1   19.10   11.60
   3 -18  -1   62.29    9.20
  -3 -18   1   72.69   11.90
  -3 -18   1   55.99    8.30
  -3  18   1   57.09    9.20
   3  18  -1   69.89   13.30
   3  18  -1   89.49   15.10
   3  18  -1   53.89    9.40
  -3  18   1   50.89   16.30
   2 -18  -1  148.19   15.60
  -2 -18   1  157.48   13.50
   2 -18  -1  153.78   13.80
  -2 -18   1  180.78   14.30
   2  18  -1  158.48   13.10
  -2  18   1  192.98   15.90
   2  18  -1  177.38   19.30
  -2  18   1  128.99   21.20
  -2  18   1  166.98   13.90
   2  18  -1  174.58   18.50
  -1 -18   1   57.59   10.10
  -1 -18   1   47.50    7.80
   1 -18  -1   48.00    8.00
   1 -18  -1   50.59   10.20
  -1  18   1   44.60    8.20
   1  18  -1   41.70   12.70
  -1  18   1   48.70   15.20
   1  18  -1   51.89    8.80
   0 -18   1   97.89   11.20
   0 -18  -1   93.69   13.20
   0 -18   1   89.59   13.70
   0 -18  -1   92.39   11.30
   0  18   1  113.89   14.80
   0  18  -1   95.89   12.40
   0  18   1   95.49   16.10
   0  18   1   72.89   11.70
   0  18  -1  100.59   15.00
   0  18  -1   75.49   15.00
  -1 -18  -1    2.80    7.90
   1 -18   1    6.10    6.70
   1 -18   1   -4.20    8.90
  -1 -18  -1   20.30    6.80
  -1  18  -1    4.40    6.90
   1  18   1   15.70    7.10
  -1  18  -1   23.50    9.50
  -1  18  -1  -13.50   12.20
   1  18   1    3.00   12.50
   1  18   1   22.40   10.40
   2 -18   1   28.80    7.50
  -2 -18  -1   33.90    7.00
  -2 -18  -1   30.30    8.60
   2  18   1   37.50   12.70
  -2  18  -1   49.50    9.60
  -2  18  -1    7.70   13.00
  -2  18  -1   19.60    7.70
   2  18   1   43.30   11.80
   2  18   1   31.90    7.70
   3 -18   1  108.79   12.30
   3 -18   1   86.89   13.30
  -3 -18  -1  106.99   11.60
  -3 -18  -1  111.99   12.40
  -3  18  -1   81.49   16.00
   3  18   1  137.69   18.50
  -3  18  -1   89.09   12.00
  -3  18  -1  131.19   14.00
   3  18   1   96.39   12.20
  -4 -18  -1  113.39   12.10
  -4 -18  -1   94.69   11.10
   4 -18   1   82.99   13.30
   4 -18   1   81.39   11.60
   4  18   1  108.99   18.50
   4  18   1   85.29   11.90
  -4  18  -1   72.79   16.50
  -4  18  -1   83.49   12.80
   5 -18   1   42.70   12.60
  -5 -18  -1   35.70   10.10
   5 -18   1   24.30    7.90
  -5 -18  -1   30.20   10.70
  -5  18  -1   38.80    8.20
   5  18   1   44.00    8.40
  -5  18  -1   28.60   15.80
   5  18   1   58.69   14.10
  -6 -18  -1   41.80    8.90
  -6 -18  -1   29.40    7.50
   6 -18   1   28.90   12.50
  -6  18  -1   18.50   17.80
   6  18   1   50.99   14.10
  -6  18  -1   38.50    7.70
   6  18   1   40.60    6.60
   6  18   1   39.30    8.00
   7 -18   1   51.99    8.50
  -7 -18  -1   65.59   10.00
  -7 -18  -1   57.39   14.20
   7 -18   1   57.19   14.30
   7  18   1   35.00   13.20
   7  18   1   64.79    8.30
  -7  18  -1   48.70   15.90
   7  18   1   57.09    8.70
  -7  18  -1   61.69   10.00
  -8 -18  -1   21.60    8.10
   8 -18   1   -5.70   12.60
  -8 -18  -1    6.70    6.20
   8  18   1    8.70    6.10
  -8  18  -1    3.10   13.90
   8  18   1   19.00   12.70
   8  18   1   18.80    5.80
  -8  18  -1    3.80    7.70
   9 -18   1   15.90   14.10
  -9 -18  -1   39.50    7.80
  -9  18  -1   42.80   14.80
  -9  18  -1   30.10    8.90
 -10 -18  -1   31.30    7.30
 -10  18  -1   16.10    8.80
 -10  18  -1   49.20   14.80
 -11 -18  -1  117.59   13.00
 -11 -18  -1  147.49   15.10
  11 -18   1   68.89   18.30
 -11  18  -1   83.89   12.30
  10 -19  -1   -3.90   14.30
 -10 -19   1    8.40    6.50
 -10  19   1   15.70    8.30
 -10  19   1   17.70   15.30
  -9 -19   1  115.59   12.10
  -9 -19   1  121.09   13.20
  -9  19   1  101.69   14.10
   9  19  -1  119.19   10.70
  -9  19   1   72.59   19.60
  -8 -19   1   59.99    9.80
   8  19  -1   56.79    8.90
  -8  19   1    2.00   17.10
   8  19  -1   35.40    7.30
  -8  19   1   13.50    7.80
   7 -19  -1  137.49   13.50
  -7 -19   1  111.09   12.20
  -7 -19   1  115.69   12.00
   7 -19  -1   94.69   17.40
   7  19  -1  133.69   14.20
  -7  19   1  123.29   13.40
   7  19  -1  131.79   11.10
   7  19  -1  133.39   22.70
   6 -19  -1   -6.10   10.90
  -6 -19   1    4.40    6.70
   6 -19  -1  -12.30    8.10
   6  19  -1    6.60    7.20
  -6  19   1   12.80    7.40
   6  19  -1    1.70    5.90
   6  19  -1    8.70   12.70
  -5 -19   1   -1.20    6.20
   5 -19  -1  -11.70    7.10
   5 -19  -1  -12.80   10.60
  -5 -19   1    9.10    6.40
   5  19  -1   18.60   11.00
   5  19  -1    9.10    7.30
  -5  19   1    4.00    7.30
   4 -19  -1   -4.60    7.40
  -4 -19   1   -2.30    6.20
   4 -19  -1  -14.20   10.40
   4  19  -1  -10.00    7.20
   4  19  -1   23.50   12.00
  -4  19   1    1.10    7.10
  -3 -19   1   -5.70    8.20
  -3 -19   1    5.80    6.50
   3 -19  -1   -3.80    7.20
   3  19  -1    2.80    7.40
  -3  19   1   11.80    7.10
   3  19  -1   17.50   11.70
   3  19  -1   12.80   11.30
  -2 -19   1   -0.50    8.60
   2 -19  -1  -18.50   10.80
  -2 -19   1   11.70    6.60
   2 -19  -1    8.60    7.10
   2  19  -1  -13.40   11.50
  -2  19   1   29.00    9.40
   2  19  -1   15.00   11.20
   2  19  -1    1.30    7.00
  -2  19   1    8.50    7.10
   1 -19  -1  132.79   12.60
   1 -19  -1   98.49   15.10
  -1 -19   1  122.79   11.80
  -1 -19   1  104.69   13.70
  -1  19   1   75.79   17.20
   1  19  -1  116.99   13.20
  -1  19   1  102.09   12.40
  -1  19   1  135.39   16.20
   1  19  -1  128.49   16.80
   1  19  -1   89.89   18.10
   0 -19  -1    0.00    8.60
   0 -19   1    7.00    9.70
   0 -19  -1    7.90    6.60
   0 -19   1   12.50    7.00
   0  19  -1   21.50   10.30
   0  19  -1    6.00    6.70
   0  19   1  -15.00   12.70
   0  19   1   23.30   10.40
   0  19   1   10.10    6.90
  -1 -19  -1   87.79   13.10
  -1 -19  -1  114.89   12.00
   1 -19   1  121.79   12.20
   1  19   1   86.99   16.20
   1  19   1  117.29   12.60
  -1  19  -1   96.39   12.50
   1  19   1  144.99   18.50
  -2 -19  -1    1.50    6.10
   2 -19   1   -9.40    9.60
   2 -19   1   13.00    7.00
  -2 -19  -1   -5.20    7.80
   2  19   1   -8.60   12.20
  -2  19  -1   -2.50    7.80
   2  19   1   23.40   11.50
   2  19   1    6.20    7.20
  -3 -19  -1   -0.30    7.40
   3 -19   1    3.40    6.90
  -3 -19  -1    6.80    6.40
  -3  19  -1    6.20    7.00
   3  19   1   -2.30    7.10
   3  19   1   24.20   11.70
   3  19   1    5.30   11.80
  -4 -19  -1    6.80    7.00
   4 -19   1  -14.40   10.60
   4 -19   1   -9.10    6.50
   4  19   1   -7.10    6.90
  -4  19  -1   -4.90    6.50
   4  19   1   15.40   12.00
  -5 -19  -1   -6.80    6.20
   5 -19   1  -15.60    7.00
  -5 -19  -1   17.00    6.70
   5 -19   1  -16.70   11.00
   5  19   1   19.10   12.80
   5  19   1   -3.00    7.00
  -5  19  -1  -19.50   14.70
  -5  19  -1    1.30    6.40
   6 -19   1   40.20   13.20
  -6 -19  -1   67.69   10.30
  -6 -19  -1   49.00   10.90
  -6  19  -1   54.99    9.20
   6  19   1   86.89   12.10
  -6  19  -1   24.80   17.70
   6  19   1   60.69   14.70
  -7 -19  -1   30.00    6.60
  -7 -19  -1   35.20    8.10
   7 -19   1   18.00   12.80
  -7  19  -1   25.30    8.00
  -7  19  -1    9.50   15.20
   7  19   1   38.30    7.00
   7  19   1   47.60   14.80
   7  19   1   25.70    5.90
  -8 -19  -1   31.60    8.70
   8 -19   1    4.40   13.60
  -8  19  -1   21.00    8.10
  -8  19  -1   31.80   15.70
  -9 -19  -1   35.50    7.70
  -9 -19  -1   59.09   10.90
   9 -19   1   -4.70   14.20
  -9  19  -1   38.90   15.40
  -9  19  -1   31.00    8.90
 -10 -19  -1  218.18   16.40
 -10 -19  -1  184.28   15.50
 -10  19  -1  245.98   24.00
  -9  20   1   40.50   16.50
  -9  20   1   26.20    8.80
  -8 -20   1   30.00    7.00
   8 -20  -1   -8.90   12.60
  -8  20   1  -12.60   16.40
  -8  20   1    9.30    7.80
  -7 -20   1   59.89   10.80
  -7 -20   1   62.89    9.90
   7 -20  -1   18.30   13.00
   7  20  -1   37.50    6.90
  -7  20   1   49.90    9.70
  -7  20   1   -4.10   18.00
   7  20  -1   34.30    7.70
  -6 -20   1  142.49   12.40
   6 -20  -1   94.09   13.50
   6 -20  -1   97.29   17.40
  -6 -20   1  122.19   12.50
   6  20  -1  145.79   13.80
   6  20  -1  131.39   22.10
  -6  20   1  123.59   14.00
  -6  20   1   84.09   20.30
   5 -20  -1   23.70   12.50
  -5 -20   1   50.89   11.50
  -5  20   1   24.70    8.00
   5  20  -1   47.40   12.90
   4 -20  -1   -2.00    7.20
   4 -20  -1  -12.40   10.60
  -4 -20   1   17.00    6.80
  -4 -20   1   16.30    8.80
  -4  20   1   17.50    7.60
   4  20  -1   29.00   11.80
   4  20  -1    6.80    7.60
   4  20  -1   31.00   12.60
  -3 -20   1    6.90    8.20
  -3 -20   1   25.70    7.00
   3 -20  -1   12.30    7.30
   3  20  -1   10.50   12.30
   3  20  -1   24.10   12.10
   3  20  -1    8.30    7.90
  -3  20   1    7.10    8.00
  -2 -20   1    8.80    9.10
   2 -20  -1   23.10    7.40
  -2 -20   1   27.30    6.70
  -2  20   1    8.00    7.00
   2  20  -1    5.00    7.50
   2  20  -1   23.40   11.30
   1 -20  -1    9.30    7.00
  -1 -20   1   29.10    7.20
  -1 -20   1   -3.40    9.50
   1  20  -1    7.30    6.90
  -1  20   1   15.40    7.40
  -1  20   1   34.60   10.90
   1  20  -1   24.10   11.50
   1  20  -1  -14.30   12.50
   0 -20   1   67.49   10.60
   0 -20  -1   35.80   10.50
   0  20   1   16.50   15.30
   0  20  -1   46.70    9.20
   0  20   1   78.99   11.30
  -1 -20  -1   17.60    6.60
  -1 -20  -1   -3.40    8.30
   1 -20   1   -0.90    9.80
   1 -20   1   16.40    6.70
   1  20   1   34.70   12.40
  -1  20  -1   32.90   11.70
   1  20   1    3.60    7.30
   1  20   1   -0.60   13.80
  -1  20  -1   31.10   10.10
  -2 -20  -1   40.20    9.20
  -2 -20  -1   42.90    7.90
   2 -20   1   31.00    7.80
   2 -20   1   22.20   11.70
   2  20   1   26.50    7.80
  -2  20  -1   -3.20   14.90
  -2  20  -1   25.90    7.70
   2  20   1   30.50   14.30
  -3 -20  -1    5.10    8.40
   3 -20   1    6.20    7.00
   3 -20   1   -1.90   11.20
   3  20   1   17.00   16.20
   3  20   1   -2.30    6.60
  -3  20  -1    6.40    7.20
  -4 -20  -1   31.90    8.80
  -4 -20  -1   26.70    7.20
   4 -20   1   12.30    7.30
   4  20   1   44.80   12.90
   4  20   1   13.10    7.40
   4  20   1   29.60   12.70
  -4  20  -1   23.00   10.10
  -5 -20  -1   36.50    7.30
   5 -20   1   19.00   12.10
  -5 -20  -1   41.10    8.40
   5  20   1   32.60    8.00
  -5  20  -1   31.50    8.30
   5  20   1   49.00   12.50
   6 -20   1  -11.30   11.80
  -6 -20  -1   14.10    6.50
  -6 -20  -1    6.50    7.00
   6  20   1   34.50   14.20
  -6  20  -1  -23.60   15.10
   6  20   1   22.10    6.60
  -6  20  -1    7.30    7.50
  -7 -20  -1  102.19   11.30
   7 -20   1   67.89   15.20
  -7 -20  -1   93.09   12.00
  -7  20  -1  103.29   13.20
  -7  20  -1   66.99   17.00
   8 -20   1   62.19   17.90
  -8 -20  -1  116.09   12.80
  -8  20  -1   71.29   11.20
  -8  20  -1   87.29   18.00
   9 -20   1   24.80   15.70
  -9  20  -1   50.89   15.10
  -9  20  -1   36.40    9.40
  -8 -21   1  170.38   13.90
  -8 -21   1  194.58   13.60
  -8  21   1  124.29   15.30
   7 -21  -1   12.10   14.30
  -7 -21   1   59.49   10.00
  -7  21   1   36.80    8.80
  -6 -21   1   24.50    6.80
   6 -21  -1  -19.00   12.50
  -6  21   1    3.80    7.60
   5 -21  -1  -21.10   10.90
  -5 -21   1   10.60    8.60
   5  21  -1    8.40    7.30
   5  21  -1   19.20   12.70
  -5  21   1    5.30    7.50
  -4 -21   1   77.69   13.80
  -4 -21   1  102.69   16.20
   4  21  -1  101.69   17.70
  -4  21   1   92.29   12.60
   4  21  -1   98.59   19.50
  -3 -21   1   29.20    9.50
   3 -21  -1   13.40   11.60
   3 -21  -1   31.50    8.20
   3  21  -1   25.10    8.30
   3  21  -1   14.40   13.30
  -3  21   1   40.40    8.20
   2 -21  -1   28.00    8.00
   2  21  -1   24.90    8.90
  -2  21   1   31.50   11.60
   2  21  -1   32.50   12.40
   1 -21  -1   81.79   11.50
  -1 -21   1  100.29   11.40
  -1  21   1   79.69   12.10
   0 -21  -1   95.59   11.90
   0 -21   1   95.69   11.80
   0  21  -1   78.69   12.20
   0  21   1   87.39   12.00
  -1 -21  -1   33.60    7.40
   1 -21   1   22.00    7.00
  -1  21  -1   16.80    7.90
   1  21   1   11.80    7.10
   1  21   1   40.20   12.60
  -2 -21  -1   34.60   10.00
   2 -21   1   26.10   11.90
   2 -21   1   48.60    8.10
   2  21   1   40.50    8.00
  -3 -21  -1   48.00   10.10
   3 -21   1   70.89   10.30
   3 -21   1   37.10   12.80
   3  21   1   42.50   14.90
  -3  21  -1   47.40    8.90
  -4 -21  -1   23.70    6.80
   4  21   1   35.70   13.10
   4  21   1   14.10    7.00
  -4  21  -1   29.70    8.40
   4  21   1   50.69   13.80
  -5 -21  -1   91.09   11.20
  -5  21  -1   75.09   12.30
   5  21   1   89.79   12.00
   5  21   1  109.89   20.60
   6 -21   1   46.20   14.30
  -6  21  -1   33.40   16.70
  -6  21  -1   54.79    9.40
  -7 -21  -1   48.80   10.70
  -7  21  -1   39.20    9.00
  -7  21  -1   33.10   16.40
  -8  21  -1   32.10   16.60
  -6  22   1  117.29   14.20
   5 -22  -1   31.00   13.80
  -5  22   1   37.90    8.50
   4  22  -1   42.00   14.50
   3 -22  -1   81.79   10.60
  -3 -22   1   54.79   11.60
   3 -22  -1   41.40   13.60
   3  22  -1   50.29   18.80
   2 -22  -1   42.00    8.80
   2 -22  -1   23.20   11.80
  -2  22   1   43.40    9.10
   2  22  -1   50.59    8.90
  -1 -22   1   41.90   12.20
   1 -22  -1   48.10   12.40
  -1  22   1   55.59   11.10
   1  22  -1   57.79    9.30
   0 -22   1  153.58   13.00
   0 -22   1  102.09   16.10
   0 -22  -1  145.09   16.90
   0  22   1  157.08   15.20
   0  22  -1  140.49   14.10
   1 -22   1  114.99   10.50
  -1 -22  -1   86.89   12.90
  -1  22  -1   87.69   12.70
   1  22   1  128.49   17.50
   1  22   1   69.29   11.70
   2 -22   1   13.80   12.50
  -2 -22  -1   69.79   10.80
  -2  22  -1   44.60    8.70
   2  22   1   49.40    8.30
   3  22   1   84.99   11.50
  -3  22  -1   91.99   13.10
  -4 -22  -1  109.79   12.10
   4  22   1  140.29   21.70
  -4  22  -1  100.69   13.30
   4  22   1  123.69   20.70
  -5 -22  -1   34.70    7.30
  -5  22  -1   13.30    7.50
   6 -22   1   -7.10   13.50
  -6  22  -1   20.80    8.70
   4 -23  -1   84.19   16.60
  -4  23   1  109.49   12.70
  -3  23   1   27.20    7.50
   3  23  -1   36.40   13.30
   3  23  -1   13.70    8.00
  -2  23   1  108.89   12.80
   2  23  -1  115.29   18.70
   1 -23  -1  142.79   19.90
  -1 -23   1  162.38   18.30
   1  23  -1  234.08   20.40
  -1  23   1  184.18   14.90
   1  23  -1  233.28   17.00
   0 -23  -1   62.29    9.70
   0  23   1   37.90    7.50
   0  23  -1   83.19   13.30
  -1 -23  -1   31.90    7.00
  -1  23  -1   16.10    7.50
  -2 -23  -1  125.89   12.20
  -2  23  -1  178.78   19.60
  -2  23  -1  116.09   14.30
   2  23   1  170.68   20.90
  -3 -23  -1  180.78   14.00
  -3  23  -1  165.28   15.50
   3  23   1  247.88   29.50
  17   0  -2   -2.60   12.00
 -17   0   2   43.20   12.70
  16   0  -2  -13.30    9.60
 -16   0   2   -7.30    7.10
  15   0  -2   36.70   15.80
  15   0  -2   61.79   13.20
  15   0  -2   51.39    9.70
 -15   0   2   48.20    8.60
 -15   0   2   58.19   14.00
  14   0  -2   60.19    9.90
 -14   0   2   45.20    8.30
  14   0  -2   74.79   13.30
 -14   0   2   46.10   13.90
  14   0  -2   59.69   15.90
  13   0  -2  157.68   15.80
  13   0  -2  160.78   22.30
  13   0  -2  126.59   14.40
 -13   0   2  143.29   18.40
 -13   0   2  128.99   18.40
 -12   0   2 1045.40   47.30
  12   0  -2 1069.49   48.00
  12   0  -2 1127.49   53.29
 -12   0   2 1015.90   51.69
  12   0  -2 1064.99   49.70
  11   0  -2   -5.80    9.20
 -11   0   2  -17.20   10.20
  11   0  -2    3.40   11.80
  11   0  -2  -13.50    6.10
 -11   0   2   -3.70    4.80
  10   0  -2  171.68   14.20
  10   0  -2  188.58   17.40
  10   0  -2  170.28   13.10
 -10   0   2  149.39   20.60
 -10   0   2  199.58   12.10
  -9   0   2   91.59    8.40
  -9   0   2   70.79   11.80
   9   0  -2   85.19   10.50
   9   0  -2   85.29    9.70
   9   0  -2   77.49   15.60
   8   0  -2  266.67   16.50
   8   0  -2  270.87   15.50
  -8   0   2  273.97   14.60
  -8   0   2  228.38   20.90
   8   0  -2  300.07   21.80
   7   0  -2  353.16   19.30
   7   0  -2  348.87   18.30
  -7   0   2  287.87   22.40
  -7   0   2  373.36   17.30
   6   0  -2  700.83   32.10
   6   0  -2  804.32   35.30
  -6   0   2  716.73   31.70
   6   0  -2  744.33   33.20
  -6   0   2  713.93   35.20
  -5   0   2 1638.94   68.59
  -5   0   2 1566.74   66.39
   5   0  -2 1605.54   67.99
   5   0  -2 1618.34   67.29
   5   0  -2 1606.44   66.69
   4   0  -2  874.91   37.30
  -4   0   2  880.21   37.10
   4   0  -2  878.21   38.70
  -4   0   2  906.71   39.20
   4   0  -2  901.41   38.10
   3   0  -2   69.89    5.60
   3   0  -2   93.89    8.40
   3   0  -2   78.79    6.70
  -3   0   2   81.99   10.00
  -3   0   2   77.19    5.00
  -2   0   2    6.20    2.40
   2   0  -2   10.60    2.80
   2   0  -2   13.20    3.50
   2   0  -2    7.50    2.00
  -2   0  -2 1027.50   43.20
   2   0   2 1058.49   43.70
   2   0   2 1053.59   43.60
  -2   0  -2 1072.29   44.20
   3   0   2  645.64   27.00
  -3   0  -2  625.34   26.20
  -3   0  -2  602.84   27.60
   3   0   2  624.44   27.30
  -4   0  -2 6627.64  266.77
   4   0   2 6886.01  266.07
  -4   0  -2 6287.97  265.27
   4   0   2 6334.27  265.87
  -5   0  -2 1105.99   48.00
  -5   0  -2 1203.98   50.19
   5   0   2 1165.88   49.50
   5   0   2 1133.49   48.90
  -6   0  -2  929.21   40.70
   6   0   2  954.20   42.20
   6   0   2 1002.20   43.30
  -6   0  -2  945.71   43.80
   7   0   2   21.40    9.80
   7   0   2    7.40    7.90
   7   0   2   -2.30    6.80
  -7   0  -2   -2.50    4.40
   8   0   2 2069.19   82.79
   8   0   2 1897.51   83.59
  -8   0  -2 1951.60   82.49
   8   0   2 2043.00   84.89
  -8   0  -2 1942.61   85.49
  -9   0  -2  443.96   25.50
   9   0   2  441.16   23.70
   9   0   2  478.45   26.40
  -9   0  -2  447.56   21.70
   9   0   2  457.75   22.30
 -10   0  -2   18.30    5.70
 -10   0  -2   12.60   10.10
  10   0   2   17.70    6.00
  10   0   2   21.30    8.80
  10   0   2   25.60   10.20
 -11   0  -2  690.73   32.20
  11   0   2  721.93   37.30
 -11   0  -2  669.73   37.60
  11   0   2  731.93   32.60
  11   0   2  648.94   33.70
  12   0   2  430.96   28.30
  12   0   2  394.56   21.80
 -12   0  -2  379.26   26.30
  12   0   2  398.76   23.60
 -12   0  -2  384.36   21.40
  13   0   2   41.60   14.70
  13   0   2   23.30    8.00
 -13   0  -2   54.59    8.60
 -13   0  -2   40.50   13.50
  13   0   2   40.30   11.00
  14   0   2   92.49   16.90
 -14   0  -2  144.59   20.60
 -14   0  -2   97.99   12.50
  14   0   2  111.89   17.20
 -15   0  -2  129.39   13.80
 -15   0  -2  158.78   18.60
  15   0   2  121.09   17.90
  15   0   2  110.09   17.80
 -16   0  -2   -9.00    7.30
  16   0   2   10.10   11.60
 -16   0  -2   36.90   13.70
 -17   0  -2   88.19   11.50
  17   0   2  107.49   18.70
  17  -1  -2    8.70   12.80
  17   1  -2   -0.80   11.40
 -16  -1   2   -0.80    6.80
  16  -1  -2   -7.60   10.10
  16   1  -2    1.50    9.80
 -16   1   2   23.50   12.00
 -16   1   2   -8.10    7.20
 -15  -1   2   27.80    7.70
  15  -1  -2   13.70    8.70
  15  -1  -2    6.70   15.10
 -15  -1   2   55.19   13.80
  15  -1  -2   32.00   11.20
  15   1  -2   12.00    8.00
 -15   1   2   43.40   13.40
 -15   1   2   38.20    8.40
  15   1  -2   46.30   12.60
  14  -1  -2  442.06   34.00
 -14  -1   2  478.25   29.60
  14  -1  -2  447.36   26.00
  14  -1  -2  422.36   27.60
 -14  -1   2  446.56   24.10
 -14   1   2  472.65   29.70
 -14   1   2  450.45   24.30
  14   1  -2  393.96   25.90
  14   1  -2  435.76   24.90
  14   1  -2  477.65   33.50
 -13  -1   2   25.00   10.90
  13  -1  -2   30.60   13.70
  13  -1  -2   16.00    8.50
  13  -1  -2   32.60   10.90
 -13  -1   2   14.40   12.50
  13   1  -2   19.90   14.70
  13   1  -2   24.30    8.50
 -13   1   2   25.50   12.90
  13   1  -2   27.40   10.20
 -12  -1   2  200.88   14.20
  12  -1  -2  175.78   16.60
 -12  -1   2  172.08   21.30
  12  -1  -2  188.88   15.40
  12  -1  -2  203.98   21.60
 -12   1   2  208.48   14.20
 -12   1   2  183.18   19.90
  12   1  -2  193.98   17.90
  12   1  -2  202.08   23.60
  12   1  -2  198.78   16.20
 -11  -1   2  180.08   12.90
  11  -1  -2  177.98   16.70
  11  -1  -2  170.48   14.10
 -11  -1   2  160.38   19.60
  11  -1  -2  193.18   19.90
  11   1  -2  190.08   19.60
  11   1  -2  172.08   16.20
  11   1  -2  168.08   13.70
 -11   1   2  145.49   20.30
 -11   1   2  186.28   12.90
  10  -1  -2    0.20    9.80
  10  -1  -2    4.80    6.00
 -10  -1   2    8.00    5.20
 -10  -1   2  -10.10   16.80
  10   1  -2    6.40    6.00
  10   1  -2   17.30    8.40
 -10   1   2   14.60    5.40
 -10   1   2    1.50   12.30
  10   1  -2    3.70   10.80
   9  -1  -2   23.70    9.60
  -9  -1   2   18.20    5.10
   9  -1  -2   16.30    5.70
   9  -1  -2   21.90    8.40
  -9  -1   2    2.40    9.00
   9   1  -2   20.80   10.90
   9   1  -2   24.30    8.00
  -9   1   2   24.30    5.30
  -9   1   2    5.50    9.40
   9   1  -2   21.20    6.20
   8  -1  -2  206.18   13.40
  -8  -1   2  211.28   12.30
   8  -1  -2  193.68   15.50
   8  -1  -2  237.28   18.00
   8   1  -2  194.78   13.30
   8   1  -2  197.98   14.10
  -8   1   2  206.78   12.30
   8   1  -2  242.68   21.30
  -8   1   2  168.38   17.80
  -7  -1   2  135.19   10.10
   7  -1  -2  147.99   12.00
   7  -1  -2  132.49   12.80
  -7   1   2  145.99   10.30
   7   1  -2  150.98   11.90
   7   1  -2  141.19   12.60
   6  -1  -2   18.70    6.60
  -6  -1   2   27.40    4.50
   6  -1  -2   25.40    5.20
   6  -1  -2   35.90    8.70
   6   1  -2   17.20    5.30
   6   1  -2   17.70    6.50
  -6   1   2   17.80    4.10
   6   1  -2   33.20    9.00
  -6   1   2    3.20   10.90
   5  -1  -2  388.06   18.10
   5  -1  -2  381.66   18.70
   5  -1  -2  385.96   19.70
  -5  -1   2  385.36   20.20
  -5  -1   2  397.56   17.70
   5   1  -2  417.26   20.30
  -5   1   2  412.96   21.90
   5   1  -2  386.06   18.60
  -5   1   2  387.06   17.70
   5   1  -2  405.66   18.20
  -4  -1   2  829.52   36.90
   4  -1  -2  805.02   36.10
   4  -1  -2  848.82   35.50
  -4  -1   2  832.62   35.20
   4  -1  -2  826.72   36.50
   4   1  -2  871.81   37.30
   4   1  -2  854.51   35.60
  -4   1   2  864.11   35.30
  -4   1   2  843.52   37.60
   4   1  -2  829.12   36.10
   3  -1  -2 2853.01  124.09
  -3  -1   2 2961.20  123.49
  -3  -1   2 3086.39  124.69
   3  -1  -2 3016.80  123.99
   3  -1  -2 3034.70  123.59
   3   1  -2 3068.69  124.69
  -3   1   2 3265.67  125.39
  -3   1   2 2933.81  123.49
   3   1  -2 3089.19  123.99
   3   1  -2 3009.70  123.69
   2  -1  -2  380.06   16.40
   2  -1  -2  382.16   16.90
   2  -1  -2  372.66   17.10
  -2  -1   2  359.96   16.40
  -2  -1   2  389.06   17.90
   2   1  -2  390.36   18.00
  -2   1   2  418.86   18.40
  -2   1   2  361.56   16.30
   2   1  -2  381.36   16.40
   2   1  -2  374.96   16.60
   1  -1   2  778.12   31.70
  -2  -1  -2 2360.56   96.39
   2  -1   2 2377.86   96.99
  -2  -1  -2 2385.16   97.29
   2  -1   2 2360.06   96.49
   2   1   2 2382.66   96.59
  -2   1  -2 2303.27   96.39
  -2   1  -2 2466.65   97.39
   2   1   2 2329.37   96.99
   3  -1   2 2916.71  115.79
  -3  -1  -2 2728.73  115.29
   3  -1   2 2789.62  115.99
  -3  -1  -2 2846.82  116.49
  -3   1  -2 2685.73  115.29
  -3   1  -2 2969.60  116.69
   3   1   2 2800.02  115.69
   3   1   2 2912.61  116.19
  -4  -1  -2  105.99    8.30
  -4  -1  -2  110.99    6.20
   4  -1   2  105.09    8.20
   4  -1   2  118.89    7.90
  -4   1  -2  106.39    8.70
   4   1   2  104.39    7.80
   4   1   2  113.99    7.40
  -4   1  -2  105.89    6.10
  -5  -1  -2   77.09    5.80
   5  -1   2   73.89    7.50
   5  -1   2   76.89    9.10
  -5  -1  -2   61.29    8.70
  -5   1  -2   73.19    5.70
   5   1   2   76.29    6.90
  -5   1  -2   58.39    9.20
   5   1   2   71.89    9.30
   6  -1   2 1969.30   80.29
  -6  -1  -2 1929.11   78.79
   6  -1   2 1852.61   79.79
  -6  -1  -2 1884.81   81.19
  -6   1  -2 1860.91   81.69
   6   1   2 1888.21   79.79
  -6   1  -2 1830.72   78.69
   6   1   2 1999.40   81.09
   7  -1   2  291.07   18.90
   7  -1   2  271.67   17.30
  -7  -1  -2  243.18   14.10
   7  -1   2  284.87   17.60
  -7   1  -2  250.17   14.20
   7   1   2  251.07   15.20
   7   1   2  262.47   16.60
   7   1   2  268.87   20.40
   8  -1   2   -5.20    5.10
   8  -1   2   -0.40    7.40
   8  -1   2   11.00    8.50
  -8  -1  -2   -1.80    4.40
   8   1   2    4.90   11.00
   8   1   2   -2.70    5.00
  -8   1  -2   -0.30    4.40
   8   1   2    4.20    6.20
   9  -1   2   11.60    9.50
  -9  -1  -2    7.50    4.30
   9  -1   2   10.80    7.00
   9  -1   2    5.60    5.30
  -9  -1  -2    1.70    8.40
  -9   1  -2   -7.70    8.50
   9   1   2   11.20    6.50
   9   1   2    1.20    5.10
  -9   1  -2    9.20    4.80
   9   1   2   18.50    9.70
 -10  -1  -2  696.63   35.50
  10  -1   2  697.13   31.70
 -10  -1  -2  677.33   31.50
  10  -1   2  705.53   35.20
 -10   1  -2  672.43   31.50
 -10   1  -2  687.33   36.60
  10   1   2  729.13   36.30
  10   1   2  668.43   32.90
  10   1   2  684.23   31.80
  11  -1   2   16.10    8.70
 -11  -1  -2    8.20   11.10
 -11  -1  -2   14.70    6.00
  11  -1   2   11.40   11.30
  11  -1   2    2.00    6.40
  11   1   2    3.10   11.90
 -11   1  -2   13.20    6.10
 -11   1  -2    6.40   11.10
  11   1   2    8.40    8.20
  11   1   2    3.70    6.50
 -12  -1  -2  158.28   13.00
  12  -1   2  175.18   20.10
  12  -1   2  161.38   17.20
  12  -1   2  141.99   14.30
 -12  -1  -2  139.49   18.10
  12   1   2  152.28   14.90
  12   1   2  161.28   21.80
 -12   1  -2  132.59   20.60
  12   1   2  139.79   13.30
 -12   1  -2  148.19   13.10
  13  -1   2  606.34   34.80
  13  -1   2  566.14   32.40
 -13  -1  -2  566.34   33.90
  13  -1   2  594.34   29.40
 -13  -1  -2  576.14   29.10
  13   1   2  569.24   31.80
 -13   1  -2  589.84   34.40
  13   1   2  605.74   29.50
 -13   1  -2  573.64   28.90
  13   1   2  591.54   35.90
 -14  -1  -2  103.69   12.50
  14  -1   2  113.59   15.50
 -14  -1  -2  134.09   19.50
  14  -1   2   87.69   16.30
  14   1   2   97.39   17.30
  14   1   2   67.39    8.70
 -14   1  -2  101.89   13.20
 -14   1  -2  122.39   20.50
  14   1   2  102.29   16.80
 -15  -1  -2   -1.30    6.70
 -15  -1  -2   27.10   11.60
  15  -1   2    6.20   10.50
  15   1   2    8.80   11.00
 -15   1  -2   12.40   12.10
 -15   1  -2   -3.30    6.80
  15   1   2  -23.90   13.60
  16  -1   2   89.59   15.30
 -16  -1  -2   56.59    9.80
  16  -1   2   31.40   15.90
  16   1   2   73.69   14.20
 -16   1  -2   64.39   10.20
  17  -1   2   75.09   15.50
 -17  -1  -2   77.69   12.50
  17   1   2   50.49   17.50
  17   1   2   81.99   15.10
 -17   1  -2   98.49   13.40
 -16  -2   2   29.90    7.80
  16  -2  -2   24.80   11.60
  16   2  -2   48.60   12.60
  16   2  -2   -3.80   16.80
 -16   2   2   28.10    8.60
  15  -2  -2   22.90   10.90
  15  -2  -2    6.80   13.40
 -15  -2   2   13.60    7.50
  15  -2  -2    4.20    7.80
  15   2  -2   13.60    9.90
 -15   2   2   40.90   15.10
 -15   2   2   15.80    7.60
  15   2  -2  -12.00   14.60
  15   2  -2    6.60    7.30
  14  -2  -2   15.50    8.60
  14  -2  -2    1.70   13.50
 -14  -2   2   18.60   12.30
  14  -2  -2   14.50   11.70
 -14  -2   2   26.40    7.60
  14   2  -2    8.70   10.60
 -14   2   2   22.80   12.90
  14   2  -2   12.00    7.90
  14   2  -2   -4.30   13.40
 -14   2   2   21.10    7.40
  13  -2  -2   44.40   13.70
 -13  -2   2   49.60   15.40
  13  -2  -2   27.30    9.00
  13  -2  -2   49.20   12.80
 -13   2   2   42.90   13.80
  13   2  -2   36.00    9.20
  13   2  -2   57.99   12.20
  13   2  -2   32.30   15.20
 -13   2   2   31.30   11.10
  12  -2  -2  200.98   17.60
 -12  -2   2  195.38   19.90
  12  -2  -2  190.88   16.90
 -12  -2   2  227.68   15.00
  12  -2  -2  230.68   23.20
  12   2  -2  223.38   18.50
 -12   2   2  231.78   15.20
  12   2  -2  227.18   16.90
 -12   2   2  212.38   21.10
  12   2  -2  257.67   26.40
  11  -2  -2   22.60    9.20
 -11  -2   2    4.60   11.90
  11  -2  -2   21.40   11.10
 -11  -2   2   17.50    6.00
  11  -2  -2   14.80    6.70
 -11   2   2    2.90   11.50
  11   2  -2   20.50    9.50
  11   2  -2   14.60    7.30
  11   2  -2   16.90   12.70
 -11   2   2   24.90    6.30
 -10  -2   2    5.70    5.10
  10  -2  -2    2.60   10.30
  10  -2  -2   -0.50    5.50
 -10  -2   2  -19.50   15.80
  10  -2  -2    0.60    8.80
  10   2  -2   -0.90    6.90
  10   2  -2   -0.80    5.60
 -10   2   2  -11.40    9.90
  10   2  -2   11.80   11.50
 -10   2   2    3.40    4.80
  -9  -2   2   88.79    7.90
  -9  -2   2   74.69   14.40
   9  -2  -2   84.69   12.30
   9  -2  -2   94.69   10.00
  -9   2   2   93.19    8.70
   9   2  -2   85.09   11.60
  -9   2   2   68.59   14.30
   9   2  -2   80.09    9.50
   9   2  -2  102.29   15.30
   8  -2  -2  296.27   17.80
  -8  -2   2  278.57   19.70
   8  -2  -2  295.77   16.70
  -8  -2   2  301.07   15.70
   8  -2  -2  322.27   19.80
  -8   2   2  286.87   21.30
   8   2  -2  293.57   16.70
   8   2  -2  340.37   21.50
  -8   2   2  305.17   16.10
   8   2  -2  314.47   18.30
   7  -2  -2    5.10    5.80
  -7  -2   2    0.40    4.70
   7  -2  -2   10.50    7.80
   7  -2  -2   23.30    8.80
  -7   2   2   11.10    5.10
   7   2  -2   36.00   10.80
   7   2  -2    8.10    5.90
   7   2  -2    0.50    7.20
   6  -2  -2   27.50    8.20
  -6  -2   2    9.80    4.40
   6  -2  -2   22.40    5.90
   6  -2  -2   10.20    7.70
  -6   2   2    5.00   12.40
  -6   2   2   11.50    4.60
   6   2  -2    7.60    6.50
   6   2  -2   14.50    5.60
   6   2  -2   29.30   10.90
  -5  -2   2   21.40    6.40
  -5  -2   2   31.30    5.00
   5  -2  -2   41.50    5.40
   5  -2  -2   26.80    5.40
   5  -2  -2   38.40    7.70
  -5   2   2   37.80    5.00
  -5   2   2   37.20    9.40
   5   2  -2   32.30    5.20
   5   2  -2   36.70    7.90
   5   2  -2   43.20    5.90
   4  -2  -2  805.32   34.20
  -4  -2   2  801.72   33.90
   4  -2  -2  768.12   34.80
   4  -2  -2  797.22   34.90
  -4  -2   2  811.92   35.40
  -4   2   2  847.32   36.70
  -4   2   2  788.62   33.90
   4   2  -2  853.11   34.60
   4   2  -2  805.12   35.80
   4   2  -2  803.22   34.20
   3  -2  -2 1415.26   60.39
   3  -2  -2 1418.56   60.49
  -3  -2   2 1433.06   59.79
  -3  -2   2 1449.06   60.89
   3  -2  -2 1472.45   60.09
  -3   2   2 1490.55   62.19
   3   2  -2 1492.35   60.09
  -3   2   2 1428.26   59.79
   3   2  -2 1457.05   61.29
   3   2  -2 1504.35   60.29
  -2  -2   2  857.41   35.70
   2  -2  -2  852.11   36.20
  -2  -2   2  833.12   36.40
   2  -2  -2  870.31   36.40
   2  -2  -2  884.11   35.90
   2   2  -2  881.31   35.90
  -2   2   2  883.51   37.60
  -2   2   2  828.52   35.60
   2   2  -2  833.82   37.00
   2   2  -2  907.41   36.00
   1  -2  -2  988.10   39.40
  -1  -2   2  853.61   40.50
   1   2  -2  970.20   39.50
   1   2  -2 1011.00   39.70
   0  -2  -2   -1.50    0.90
   0  -2  -2   -2.30    0.50
   0  -2   2    0.50    1.20
   0   2  -2   -1.90    0.90
   0   2  -2   -1.20    0.70
  -1  -2  -2  901.21   38.70
   1  -2   2  990.20   39.30
   2  -2   2 3076.79  134.49
   2  -2   2 3357.76  135.39
  -2  -2  -2 3278.17  135.59
  -2  -2  -2 3237.18  134.79
  -2   2  -2 3603.24  135.69
   2   2   2 3295.87  135.49
  -2   2  -2 3245.78  134.69
   2   2   2 3441.56  134.79
   3  -2   2  138.89    8.40
  -3  -2  -2  151.88    7.00
  -3  -2  -2  120.19    9.20
   3  -2   2  156.38    8.00
   3   2   2  115.29    9.50
  -3   2  -2  141.49    7.00
  -3   2  -2  113.49   10.20
   3   2   2  147.49    7.70
  -3   2  -2  115.09    7.30
  -4  -2  -2  147.59    9.70
   4  -2   2  159.58    9.10
   4  -2   2  156.18    9.60
  -4  -2  -2  163.08    8.00
  -4   2  -2  151.88    8.00
  -4   2  -2  145.79   11.00
   4   2   2  158.98    8.90
   4   2   2  147.59    9.70
   5  -2   2 1001.30   43.20
  -5  -2  -2 1008.90   42.00
  -5  -2  -2 1014.50   44.10
   5  -2   2 1001.20   42.80
   5   2   2 1019.60   43.70
  -5   2  -2 1002.30   44.30
   5   2   2  956.90   42.50
  -5   2  -2  984.40   41.90
   6  -2   2   12.30    7.40
  -6  -2  -2    7.80    4.30
   6   2   2   10.80    8.70
  -6   2  -2    1.70    4.40
   6   2   2    3.00    6.90
   7  -2   2  330.27   18.70
  -7  -2  -2  323.47   16.50
   7  -2   2  322.07   18.20
   7  -2   2  369.76   19.90
  -7  -2  -2  288.27   20.10
   7   2   2  326.17   18.40
   7   2   2  322.07   17.20
  -7   2  -2  325.87   16.40
   7   2   2  316.77   20.80
   8  -2   2  346.87   19.70
   8  -2   2  373.56   18.40
   8  -2   2  376.06   20.90
  -8  -2  -2  317.77   21.30
  -8  -2  -2  367.36   17.90
   8   2   2  392.56   23.40
  -8   2  -2  336.07   22.10
  -8   2  -2  365.26   17.90
   8   2   2  370.26   18.20
   8   2   2  357.06   19.70
  -9  -2  -2  204.88   12.40
  -9  -2  -2  201.28   16.40
   9  -2   2  198.98   16.00
   9  -2   2  187.98   12.70
   9  -2   2  213.68   14.70
  -9   2  -2  202.88   12.50
   9   2   2  208.28   13.80
   9   2   2  230.58   18.80
  -9   2  -2  197.08   18.50
   9   2   2  193.28   13.00
  10  -2   2    6.50    9.30
  10  -2   2    4.40    8.00
 -10  -2  -2   11.60    5.30
 -10  -2  -2    0.60    9.20
  10  -2   2   -4.60    5.60
 -10   2  -2    3.30    9.90
 -10   2  -2   15.80    5.70
  10   2   2    5.90    7.90
  10   2   2    6.90   11.00
  10   2   2    3.40    5.50
  11  -2   2  702.43   35.20
  11  -2   2  711.03   35.80
 -11  -2  -2  691.63   32.30
  11  -2   2  675.73   32.50
 -11  -2  -2  684.63   37.40
  11   2   2  693.83   34.30
 -11   2  -2  678.73   36.80
  11   2   2  695.23   32.50
 -11   2  -2  668.83   32.60
  11   2   2  720.23   38.40
  12  -2   2  278.37   22.50
  12  -2   2  261.57   19.70
 -12  -2  -2  285.57   17.40
 -12  -2  -2  266.07   24.00
  12  -2   2  293.57   18.40
  12   2   2  288.17   25.90
 -12   2  -2  286.47   17.40
  12   2   2  286.47   17.70
 -12   2  -2  278.67   24.80
  12   2   2  276.87   19.00
 -13  -2  -2    5.20    6.80
  13  -2   2   -4.30   12.20
  13  -2   2   13.70   11.40
 -13  -2  -2    8.30   13.10
  13  -2   2   -0.70    7.30
 -13   2  -2   14.30    6.80
  13   2   2   -2.10    6.80
  13   2   2   10.90   13.90
 -13   2  -2    8.80   12.50
  13   2   2   12.90   10.30
  14  -2   2   -6.70   12.60
  14  -2   2   17.00   10.50
 -14  -2  -2   12.20    7.40
 -14  -2  -2   33.90   14.20
 -14   2  -2   18.10    7.80
  14   2   2   18.80   11.00
  14   2   2   12.00   14.00
 -14   2  -2   28.70   12.70
  15  -2   2  100.19   15.90
 -15  -2  -2   84.99   12.10
  15  -2   2   66.69   15.60
 -15   2  -2  101.19   12.40
  15   2   2   94.09   16.10
  15   2   2   62.49   17.00
  16  -2   2   -9.30   11.80
 -16  -2  -2   -8.80    6.60
  16   2   2    4.00    9.60
 -16   2  -2   -8.90    7.60
  17  -2   2   98.29   16.60
 -17  -2  -2   58.79   10.00
 -17   2  -2   86.49   12.90
  17   2   2   78.39   14.00
  17   2   2   34.70   18.20
 -17  -3   2   75.19   10.90
  17  -3  -2   54.79   16.00
  17  -3  -2   69.69   14.10
  17   3  -2   97.99   16.40
 -17   3   2   81.99   12.90
 -16   3   2   32.60   12.70
 -15  -3   2   48.60   12.90
  15  -3  -2    3.20   12.60
  15  -3  -2    4.40    7.30
 -15  -3   2   21.50    7.40
  15  -3  -2   41.20   13.20
 -15   3   2   24.30    8.10
  15   3  -2   33.00   11.50
  15   3  -2   10.80    7.30
  15   3  -2    8.70   16.60
 -14  -3   2   18.60   14.00
 -14  -3   2   11.90    6.70
  14  -3  -2   14.40   12.20
  14  -3  -2  -14.90    7.90
  14  -3  -2   -0.30   12.50
  14   3  -2   14.20    7.70
  14   3  -2    5.60   10.30
  14   3  -2   -5.10   15.80
 -14   3   2    6.80    6.40
 -14   3   2   14.70   14.60
  13  -3  -2   53.39   13.60
 -13  -3   2   49.00   12.80
  13  -3  -2   42.00    9.50
  13  -3  -2   73.69   13.70
 -13  -3   2   44.00   13.50
 -13   3   2   46.50   14.20
  13   3  -2   50.69   16.90
  13   3  -2   37.30    8.90
 -13   3   2   49.30   10.60
  13   3  -2   62.69   12.00
  12  -3  -2  162.48   17.60
  12  -3  -2  123.59   13.90
  12  -3  -2  155.98   20.10
 -12  -3   2  132.89   12.30
 -12  -3   2  121.19   17.20
 -12   3   2  137.09   12.50
  12   3  -2  152.28   24.30
  12   3  -2  142.59   15.80
 -12   3   2  121.09   18.50
  12   3  -2  113.89   13.10
  11  -3  -2   -5.10    6.60
  11  -3  -2   -1.80    9.80
  11  -3  -2   -5.30    8.60
 -11  -3   2   -5.10    5.20
  11   3  -2   -9.10    6.00
 -11   3   2    5.20    5.60
  11   3  -2    4.30   12.00
 -11   3   2  -10.50   11.10
  11   3  -2   -1.60    8.40
  10  -3  -2   90.49   11.80
  10  -3  -2   92.19   10.80
 -10  -3   2   86.49    9.10
  10  -3  -2   90.89   13.80
 -10  -3   2   62.49   14.80
 -10   3   2   80.29    9.30
 -10   3   2   68.09   15.00
  10   3  -2   67.09   12.00
  10   3  -2   89.29   17.10
  10   3  -2   86.29   10.30
   9  -3  -2   74.19   10.60
   9  -3  -2   91.09   12.50
  -9  -3   2   81.59    8.30
  -9  -3   2   67.09   12.10
   9  -3  -2   87.49    9.90
   9   3  -2   90.69   15.40
  -9   3   2   67.09   14.20
   9   3  -2   79.89   11.20
  -9   3   2   84.19    8.70
   9   3  -2   58.59    9.30
   8  -3  -2   15.90    7.90
  -8  -3   2   17.40    6.10
   8  -3  -2   10.10    7.10
   8  -3  -2   16.80    6.00
   8   3  -2    9.50    6.60
  -8   3   2    0.00   10.40
   8   3  -2   15.60    5.90
  -8   3   2   21.10    5.70
   8   3  -2   33.50   11.50
  -7  -3   2   47.60    7.60
   7  -3  -2   34.90    6.40
   7  -3  -2   37.50    8.60
  -7   3   2   28.40   12.50
   7   3  -2   38.00    6.90
   7   3  -2   73.49   21.00
   7   3  -2   33.30    7.70
   6  -3  -2   19.20    7.70
  -6  -3   2   17.30    4.80
   6  -3  -2   20.10    6.60
   6  -3  -2   10.40    7.60
   6   3  -2   31.20   11.70
  -6   3   2   15.70   12.20
   6   3  -2    7.20    6.60
  -6   3   2   16.00    5.10
   6   3  -2   21.30    6.00
   5  -3  -2    8.90    3.90
   5  -3  -2   12.20    5.30
  -5  -3   2    9.40    3.40
   5  -3  -2   12.70    6.00
   5   3  -2    7.70    5.00
   5   3  -2    7.70    7.10
  -5   3   2   21.70    9.20
   5   3  -2   11.80    4.20
  -5   3   2   11.50    3.50
   4  -3  -2  670.73   28.30
  -4  -3   2  660.63   29.20
   4  -3  -2  656.73   28.70
  -4  -3   2  658.53   28.00
   4  -3  -2  619.14   28.70
  -4   3   2  638.74   27.90
   4   3  -2  703.43   28.60
   4   3  -2  662.03   30.10
   4   3  -2  643.74   28.20
  -4   3   2  659.63   30.80
   3  -3  -2  114.89    7.90
   3  -3  -2   98.69    7.30
  -3  -3   2   99.09    6.00
   3  -3  -2  116.59    7.10
  -3  -3   2   87.39    7.10
   3   3  -2  104.29    7.10
  -3   3   2  101.99    5.90
   3   3  -2  112.39    7.20
   3   3  -2   96.69    9.60
  -3   3   2  113.19   11.50
   2  -3  -2   24.20    3.30
   2  -3  -2   26.40    4.20
   2  -3  -2   29.80    5.30
  -2  -3   2   20.50    2.80
   2   3  -2   22.20    3.50
  -2   3   2   22.70    2.90
   2   3  -2   14.10    5.30
   2   3  -2   14.10    3.70
   1  -3  -2 1232.98   49.70
   1  -3  -2 1158.98   49.10
  -1  -3   2 1185.78   49.00
   1  -3  -2 1252.07   49.20
   1   3  -2 1199.68   49.20
   1   3  -2 1198.68   49.90
  -1   3   2 1102.79   49.20
  -1   3   2 1173.08   49.99
   1   3  -2 1242.98   49.30
   0  -3  -2   49.00    4.50
   0  -3  -2   41.00    3.40
   0   3  -2   40.80    4.10
   0   3  -2   40.60    3.80
   0   3   2   32.70    4.30
  -1  -3  -2  640.74   26.30
   1  -3   2  583.04   25.90
  -1  -3  -2  609.14   26.90
   1  -3   2  666.63   27.10
  -1   3  -2  724.03   27.20
  -1   3  -2  601.84   26.40
  -1   3  -2  615.04   26.30
   1   3   2  608.44   27.00
  -2  -3  -2 1955.60   83.79
   2  -3   2 2005.10   83.59
  -2  -3  -2 1993.50   82.99
   2   3   2 2207.38   82.89
   2   3   2 1953.60   83.79
  -2   3  -2 2182.38   84.09
  -2   3  -2 1929.91   82.99
  -3  -3  -2 1638.44   69.49
   3  -3   2 1610.44   68.09
   3  -3   2 1667.73   69.19
  -3  -3  -2 1615.44   68.39
   3   3   2 1800.02   68.59
  -3   3  -2 1614.54   68.39
  -3   3  -2 1781.92   69.89
   3   3   2 1645.24   69.49
  -3   3  -2 1631.44   68.09
   4  -3   2  782.12   33.50
   4  -3   2  808.22   34.40
  -4  -3  -2  764.42   34.90
  -4  -3  -2  767.72   33.40
  -4   3  -2  781.62   34.80
  -4   3  -2  839.92   35.60
  -4   3  -2  769.12   33.30
   4   3   2  826.52   33.70
   4   3   2  801.02   35.00
   5  -3   2   50.29    7.80
  -5  -3  -2   47.00    5.60
  -5  -3  -2   30.60    7.10
   5  -3   2   53.29    8.10
  -5   3  -2   27.60    9.20
   5   3   2   39.40    5.70
   5   3   2   25.40    7.00
  -5   3  -2   44.10    5.70
   6  -3   2  267.37   17.30
   6  -3   2  297.67   17.00
  -6  -3  -2  267.87   13.80
   6  -3   2  263.17   18.70
   6   3   2  267.67   14.60
  -6   3  -2  264.87   13.90
   6   3   2  254.67   16.10
   6   3   2  213.38   18.20
  -7  -3  -2  561.74   30.70
  -7  -3  -2  642.54   28.00
   7  -3   2  617.44   29.90
   7  -3   2  628.54   29.90
   7  -3   2  657.43   28.50
  -7   3  -2  573.44   32.00
   7   3   2  617.24   29.30
  -7   3  -2  635.84   28.00
   7   3   2  671.83   28.50
   8  -3   2   20.10    7.70
   8  -3   2   20.90    8.40
  -8  -3  -2   18.90    9.70
  -8  -3  -2   22.40    5.10
   8  -3   2   16.70    5.60
   8   3   2   24.00    7.20
  -8   3  -2    1.60    9.30
  -8   3  -2   26.00    5.20
   8   3   2   12.60    5.40
   8   3   2   11.10    8.70
   9  -3   2   46.20    9.00
   9  -3   2   71.79   12.20
   9  -3   2   54.99    9.20
  -9  -3  -2   61.79   11.20
   9   3   2   68.59   10.50
   9   3   2   54.79   11.40
   9   3   2   44.70    6.40
  -9   3  -2   75.69    8.30
  -9   3  -2   39.60   10.60
 -10  -3  -2    3.80    5.00
  10  -3   2   -3.90    5.40
 -10  -3  -2    0.90   10.10
  10  -3   2    0.70    9.00
  10  -3   2    7.30    9.10
  10   3   2   -2.90    5.40
 -10   3  -2    3.50    5.20
 -10   3  -2   -7.00    9.60
  10   3   2    2.80   11.00
  10   3   2    4.10    7.80
  11  -3   2   37.20    7.70
 -11  -3  -2   29.00   11.40
  11  -3   2   33.70   10.80
  11  -3   2   40.50   11.20
 -11  -3  -2   46.60    7.50
 -11   3  -2   32.90    8.50
  11   3   2   36.60    9.70
  11   3   2   30.00    7.20
  11   3   2   44.00   13.30
 -11   3  -2   42.10   12.60
  12  -3   2   41.60   12.00
  12  -3   2   49.10   11.00
  12  -3   2   33.10    8.10
 -12  -3  -2   48.10   12.80
 -12  -3  -2   53.19    8.10
  12   3   2   36.50   14.40
  12   3   2   33.50    8.20
 -12   3  -2   68.09   10.80
 -12   3  -2   50.79   15.10
 -13  -3  -2   74.29   11.10
  13  -3   2   88.39   14.30
  13  -3   2   66.59   13.30
 -13  -3  -2   80.89   16.00
 -13   3  -2   68.99   11.40
  13   3   2   67.89    9.50
 -13   3  -2   76.59   16.50
  13   3   2   59.09   16.10
  13   3   2   65.49   12.20
  14  -3   2   73.29   14.50
  14  -3   2   91.99   15.40
 -14  -3  -2   74.99   11.80
 -14  -3  -2   98.99   18.60
  14   3   2   85.39   13.20
 -14   3  -2  103.09   20.10
 -14   3  -2   77.09   12.20
  14   3   2   87.69   17.90
 -15  -3  -2   42.10   14.20
  15  -3   2   21.90   12.70
  15   3   2   -5.30   15.30
  15   3   2    5.70    9.90
 -15   3  -2   27.00   12.50
  16  -3   2   52.79   15.30
  16  -3   2   94.99   16.10
 -16  -3  -2  100.89   12.80
  16   3   2   47.00   17.40
  16   3   2   82.49   13.90
 -16   3  -2   92.49   13.30
 -17  -3  -2   16.00    7.80
  17  -3   2    7.50   11.80
 -17   3  -2   -4.60    7.30
  17   3   2  -11.40   16.30
  17   3   2    8.80   11.10
  17  -4  -2   16.60   13.50
  17   4  -2    0.30   10.40
 -17   4   2   -6.60    7.60
  16  -4  -2  -15.00   12.60
 -16  -4   2   12.00    7.90
  16  -4  -2    9.00   12.90
  16   4  -2   23.30   11.20
 -16   4   2    7.50    6.90
  16   4  -2  -23.10   14.50
  15  -4  -2   -9.20    6.60
 -15  -4   2    4.80    6.90
  15  -4  -2    6.90   12.40
  15   4  -2   15.10   10.50
 -15   4   2   10.70   14.00
  15   4  -2  -17.80   16.50
  15   4  -2  -10.00    6.60
 -15   4   2    9.70    7.50
  14  -4  -2  -18.90   10.40
  14  -4  -2   -6.10   11.50
 -14  -4   2    2.60   11.00
 -14  -4   2   -2.40    6.60
  14  -4  -2  -13.50    7.70
 -14   4   2   -3.70    6.90
  14   4  -2  -15.90    7.20
  14   4  -2    0.40    9.90
 -14   4   2    4.10   12.40
 -13  -4   2   34.30    9.30
  13  -4  -2   32.10    8.90
  13  -4  -2   29.20   11.50
 -13  -4   2   32.20   12.70
  13  -4  -2   45.50   13.10
  13   4  -2   19.80   16.00
  13   4  -2   19.00    7.90
 -13   4   2   32.50    7.40
  13   4  -2   33.70   10.70
 -13   4   2   43.10   15.60
  12  -4  -2   81.49   13.60
 -12  -4   2   81.29   15.90
 -12  -4   2   74.29   10.90
  12  -4  -2   83.69   12.80
  12  -4  -2  102.79   17.40
  12   4  -2   64.29   15.60
 -12   4   2   70.19   14.90
  12   4  -2   87.69   13.80
  12   4  -2   59.69    9.10
 -12   4   2   87.69   11.50
  11  -4  -2   41.00   11.10
 -11  -4   2   39.20    7.00
 -11  -4   2   26.10   12.70
  11  -4  -2   39.30   10.20
  11  -4  -2   28.10    7.40
  11   4  -2   46.80   15.00
 -11   4   2   20.80   12.40
  11   4  -2   29.80    9.30
 -11   4   2   28.40    6.90
  11   4  -2   24.00    7.20
  10  -4  -2   20.20    9.10
 -10  -4   2   16.10    5.60
 -10  -4   2    7.80   11.00
  10  -4  -2   21.50    6.70
  10  -4  -2   25.50    9.50
 -10   4   2    6.20   11.00
  10   4  -2   18.20    8.00
 -10   4   2   22.40    5.80
  10   4  -2   10.90   12.80
  10   4  -2    7.20    6.50
   9  -4  -2   99.79   12.80
   9  -4  -2  115.99   10.60
  -9  -4   2  100.29    9.00
   9  -4  -2   98.79   12.10
  -9  -4   2   83.39   14.10
  -9   4   2  111.99    9.40
  -9   4   2   93.09   15.10
   9   4  -2  104.39   16.40
   9   4  -2   90.99   10.10
   9   4  -2   95.19   11.30
   8  -4  -2  162.78   14.10
   8  -4  -2  143.49   13.00
   8  -4  -2  154.98   11.90
  -8  -4   2  162.18   10.60
  -8   4   2  139.59   17.10
   8   4  -2  138.19   11.50
  -8   4   2  167.98   10.70
   8   4  -2  154.98   17.10
   8   4  -2  143.09   11.60
   7  -4  -2  708.83   32.60
  -7  -4   2  652.13   33.40
   7  -4  -2  683.43   32.70
  -7  -4   2  668.63   30.60
   7  -4  -2  735.33   31.90
  -7   4   2  690.03   30.70
   7   4  -2  677.43   31.10
   7   4  -2  749.82   36.80
  -7   4   2  683.13   36.20
   7   4  -2  698.93   32.20
   6  -4  -2  179.18   14.30
   6  -4  -2  187.98   13.00
  -6  -4   2  179.78   11.20
   6  -4  -2  180.48   15.20
   6   4  -2  163.28   13.10
  -6   4   2  194.68   22.50
   6   4  -2  197.68   18.30
  -6   4   2  176.38   11.60
   6   4  -2  194.68   12.70
   5  -4  -2  164.08   12.60
  -5  -4   2  161.28    9.80
   5  -4  -2  185.78   12.10
   5  -4  -2  182.48   10.60
   5   4  -2  165.48   11.20
  -5   4   2  197.98   18.90
   5   4  -2  181.68   11.20
  -5   4   2  160.28   10.00
   5   4  -2  171.58   15.00
  -4  -4   2    3.30    2.40
   4  -4  -2    1.70    3.10
   4  -4  -2   -1.50    4.50
   4  -4  -2    3.30    3.80
   4   4  -2    2.60    3.60
  -4   4   2    2.00    2.40
   4   4  -2    4.20    3.00
  -4   4   2    6.20    7.00
   4   4  -2    0.30    5.50
   3  -4  -2    9.10    4.10
  -3  -4   2    4.00    3.60
  -3  -4   2   10.70    2.40
  -3   4   2    8.50    5.80
  -3   4   2   15.20    2.70
   3   4  -2    1.80    4.90
   3   4  -2    9.30    3.30
   2  -4  -2 1329.57   54.29
   2  -4  -2 1303.47   54.59
   2  -4  -2 1341.67   54.79
  -2  -4   2 1335.57   54.29
  -2  -4   2 1291.57   54.39
   2   4  -2 1289.77   55.39
  -2   4   2 1272.67   54.19
   2   4  -2 1326.17   54.49
  -2   4   2 1324.27   55.79
   2   4  -2 1339.87   54.49
   1  -4  -2 2383.86  101.99
  -1  -4   2 2399.66  101.79
   1  -4  -2 2595.74  101.99
  -1  -4   2 2539.75  101.99
   1   4  -2 2517.95  102.69
  -1   4   2 2476.85  101.99
  -1   4   2 2511.15  103.09
   1   4  -2 2554.64  102.19
  -1   4   2 2442.56  102.19
   1   4  -2 2583.14  102.19
   0  -4  -2   77.89    4.30
   0  -4  -2   69.09    4.70
   0   4  -2   61.29    5.10
   0   4   2   50.09    5.60
   0   4  -2   69.99    5.70
   0   4  -2   57.49    5.10
   0   4   2   58.79    4.90
  -1  -4  -2 1825.72   75.79
  -1  -4  -2 1841.32   75.19
   1  -4   2 1942.01   75.79
   1  -4   2 1798.82   74.79
  -1   4  -2 1720.93   74.89
  -1   4  -2 1791.92   75.19
   1   4   2 1776.12   75.79
  -1   4  -2 1994.50   75.59
   2  -4   2  319.47   15.30
  -2  -4  -2  314.87   14.10
  -2  -4  -2  306.87   14.90
   2   4   2  342.97   13.70
  -2   4  -2  303.77   13.50
  -2   4  -2  302.37   13.30
  -2   4  -2  363.16   16.40
  -2   4  -2  322.57   14.20
   2   4   2  293.97   15.60
  -3  -4  -2  122.69    6.90
   3  -4   2  138.79    6.30
   3  -4   2  133.49    8.30
  -3  -4  -2  120.19    8.60
   3   4   2  119.59    8.70
   3   4   2  143.39    7.00
  -3   4  -2  142.69   10.30
  -3   4  -2  134.49    7.00
  -3   4  -2  111.89    6.50
   4  -4   2  613.34   25.80
  -4  -4  -2  585.94   27.70
  -4  -4  -2  586.64   26.00
   4  -4   2  599.04   27.20
   4   4   2  647.74   26.30
  -4   4  -2  625.74   28.70
  -4   4  -2  591.64   26.00
  -4   4  -2  566.64   25.70
   4   4   2  585.74   28.00
   4   4   2  651.73   27.30
  -5  -4  -2 1074.69   46.40
   5  -4   2 1091.89   47.80
  -5  -4  -2 1041.10   48.20
   5  -4   2 1091.39   46.50
  -5   4  -2 1104.39   49.70
   5   4   2 1156.28   47.00
   5   4   2 1088.79   48.70
   5   4   2 1180.18   46.80
  -5   4  -2 1093.29   46.50
  -6  -4  -2  120.29   13.70
  -6  -4  -2  165.68   10.50
   6  -4   2  174.58   12.30
   6  -4   2  172.68   13.40
   6  -4   2  167.58   11.90
   6   4   2  143.89   12.00
   6   4   2  168.68   11.70
  -6   4  -2  146.39   10.50
   7  -4   2  297.57   15.60
  -7  -4  -2  231.58   17.60
   7  -4   2  265.67   16.30
   7  -4   2  270.57   17.00
  -7  -4  -2  285.27   14.60
   7   4   2  259.87   15.00
  -7   4  -2  300.67   14.70
   7   4   2  264.27   15.80
   7   4   2  242.98   18.90
  -8  -4  -2  188.08   15.40
   8  -4   2  204.48   14.60
   8  -4   2  207.68   14.80
  -8  -4  -2  214.28   12.10
   8  -4   2  198.88   12.60
   8   4   2  211.08   18.60
   8   4   2  215.78   13.00
  -8   4  -2  171.18   18.40
   8   4   2  190.78   13.60
  -8   4  -2  210.68   12.30
  -9  -4  -2   35.80    9.30
   9  -4   2   23.80    5.90
   9  -4   2   27.90    7.70
  -9  -4  -2   34.00    5.80
   9  -4   2   39.90    9.80
   9   4   2   30.60   10.70
   9   4   2   33.60    7.30
  -9   4  -2   37.00    5.90
   9   4   2   34.10    6.10
  -9   4  -2   29.60   11.30
 -10  -4  -2   81.99    9.50
 -10  -4  -2   72.59   13.00
  10  -4   2   56.99    9.90
  10  -4   2   73.19   10.10
  10  -4   2  101.79   14.20
  10   4   2   96.39   18.70
  10   4   2   64.19   10.20
  10   4   2   82.09   11.70
 -10   4  -2   69.49   13.00
 -10   4  -2   84.99    9.70
  11  -4   2   59.99   12.10
 -11  -4  -2   39.30    8.70
  11  -4   2   39.20    7.70
  11  -4   2   28.30   10.30
 -11  -4  -2   45.70   11.90
 -11   4  -2   30.00   12.50
  11   4   2   31.40    7.30
  11   4   2   47.50   14.10
  12  -4   2    0.20    7.30
  12  -4   2   11.80   10.50
 -12  -4  -2   19.00    6.40
 -12  -4  -2   30.50   13.40
  12  -4   2   23.20   10.70
 -12   4  -2   16.10    7.00
 -12   4  -2    5.30   12.00
  12   4   2   10.20    7.30
  12   4   2   24.80    9.40
  12   4   2    9.60   14.50
  13  -4   2   82.79   12.70
 -13  -4  -2  115.59   16.70
 -13  -4  -2   98.09   12.00
  13  -4   2  125.69   17.70
  13  -4   2   84.49   17.10
 -13   4  -2  110.39   13.20
  13   4   2  117.69   23.70
 -13   4  -2  114.79   18.10
  13   4   2   82.89   11.90
  13   4   2  105.39   14.80
  14  -4   2   -3.00   11.40
 -14  -4  -2    3.20   11.40
 -14  -4  -2   -8.00    7.00
  14   4   2  -21.80   14.60
 -14   4  -2   15.60   12.20
  14   4   2    2.70    9.70
 -14   4  -2   -5.30    6.70
 -15  -4  -2   42.60    9.00
 -15  -4  -2   70.59   14.90
  15  -4   2   66.89   14.90
  15  -4   2   31.60   12.90
  15   4   2   53.79   11.50
  15   4   2   36.20   17.20
 -15   4  -2   37.50    8.60
 -16  -4  -2   53.99   13.30
  16  -4   2   20.10   12.20
 -16  -4  -2   20.40    8.00
  16   4   2   32.80   11.20
 -16   4  -2   33.40    9.00
  16   4   2    1.70   16.00
  17  -4   2    6.30   13.90
 -17  -4  -2   35.20   12.30
  17   5  -2   13.20   10.30
 -16  -5   2   -7.00    6.70
  16  -5  -2   -0.90   11.30
 -16   5   2   28.20   14.30
  16   5  -2    5.00    9.80
 -16   5   2   10.80    7.80
  16   5  -2  -30.60   16.90
  15  -5  -2    7.00   11.40
 -15  -5   2    3.70    6.50
 -15  -5   2   25.50   12.50
  15  -5  -2  -19.10   10.80
  15   5  -2    0.60    9.40
  15   5  -2  -29.40   16.30
 -15   5   2   -0.70    7.10
 -15   5   2   21.50   12.90
  15   5  -2    6.30    7.00
  14  -5  -2   41.00   12.10
  14  -5  -2   35.70    9.10
 -14  -5   2   48.50   14.20
  14  -5  -2   19.10   11.80
 -14  -5   2   47.20    8.70
  14   5  -2    7.40   17.50
 -14   5   2   54.19   16.00
  14   5  -2   31.50    8.60
  14   5  -2   34.60   10.80
 -14   5   2   27.90    7.90
  13  -5  -2   28.60   11.30
  13  -5  -2   21.40   11.30
 -13  -5   2   31.00   13.30
 -13  -5   2   23.40    7.50
  13  -5  -2   34.30    9.00
 -13   5   2   22.40    7.20
  13   5  -2   26.90   18.60
  13   5  -2   17.60    8.70
 -13   5   2   29.90   13.50
  13   5  -2   16.90    9.80
 -12  -5   2  215.78   21.20
  12  -5  -2  223.98   16.80
  12  -5  -2  222.68   18.60
 -12  -5   2  208.78   15.30
  12  -5  -2  236.38   20.00
  12   5  -2  214.68   16.40
 -12   5   2  237.08   22.00
 -12   5   2  236.58   16.00
  12   5  -2  212.28   17.70
  12   5  -2  243.18   25.00
 -11  -5   2   13.20    5.80
  11  -5  -2    9.40    7.30
  11  -5  -2   11.60    9.40
 -11  -5   2   11.30   11.80
  11  -5  -2    1.60    9.00
  11   5  -2    6.60    6.80
 -11   5   2   18.30    6.70
 -11   5   2   -5.30   13.30
  11   5  -2    8.50    8.70
  11   5  -2    4.80   14.30
  10  -5  -2   36.10   10.50
  10  -5  -2   20.40    6.90
 -10  -5   2   37.20   10.30
 -10  -5   2   29.50    6.30
 -10   5   2   34.00    6.60
  10   5  -2   34.50   13.70
  10   5  -2   22.00    6.80
 -10   5   2   30.10   12.10
  10   5  -2   23.60    8.00
   9  -5  -2   11.50    9.10
  -9  -5   2   -2.30    8.70
   9  -5  -2    3.60    5.80
  -9  -5   2   10.80    4.90
   9  -5  -2   10.80    7.10
   9   5  -2    0.90    6.40
   9   5  -2    1.30   10.20
  -9   5   2    7.00    5.00
   9   5  -2    0.00    5.50
  -9   5   2   -1.10   10.10
   8  -5  -2    4.10    7.10
  -8  -5   2    3.70    4.00
  -8  -5   2    0.10    8.60
   8  -5  -2    8.40    6.70
   8  -5  -2    5.80    5.70
   8   5  -2    3.30    6.40
   8   5  -2   12.80   11.10
  -8   5   2    2.40   10.50
   8   5  -2    4.80    5.40
  -8   5   2   10.80    5.00
   7  -5  -2   26.20    7.20
  -7  -5   2    1.70    8.90
   7  -5  -2   19.90    6.10
   7   5  -2   11.60    7.00
  -7   5   2   18.00   13.30
   7   5  -2   21.20   10.40
   7   5  -2   15.10    5.80
   6  -5  -2   42.40    9.50
   6  -5  -2   40.10    7.70
  -6  -5   2   49.99    7.60
   6  -5  -2   43.50    7.20
  -6   5   2   52.69   15.20
   6   5  -2   44.20    7.00
   6   5  -2   35.20   16.60
  -6   5   2   49.10    7.10
   5  -5  -2   10.20    7.90
   5  -5  -2   15.20    6.00
   5  -5  -2    6.10    5.40
  -5  -5   2    2.10    5.80
  -5   5   2    0.90    4.10
   5   5  -2    2.70    9.30
  -5   5   2   34.40   13.30
   5   5  -2    9.80    5.70
   5   5  -2   -3.00    5.80
   4  -5  -2   29.00    5.60
  -4  -5   2   30.90    4.60
   4  -5  -2   47.60    6.60
  -4  -5   2   20.00    5.60
   4  -5  -2   46.50    6.80
   4   5  -2   27.40    4.90
   4   5  -2   35.10    5.00
   4   5  -2   27.30    7.20
  -4   5   2   46.70   10.00
  -4   5   2   32.90    4.80
  -3  -5   2  805.82   34.00
   3  -5  -2  807.32   34.00
  -3  -5   2  787.32   33.30
   3  -5  -2  781.22   34.00
   3  -5  -2  792.22   33.60
  -3   5   2  784.62   33.40
   3   5  -2  808.32   33.60
   3   5  -2  784.42   33.70
   3   5  -2  772.32   35.00
  -3   5   2  775.82   35.30
   2  -5  -2  149.99    8.80
   2  -5  -2  164.48    8.50
  -2  -5   2  157.58    8.50
  -2  -5   2  170.88    8.30
  -2   5   2  162.48   11.00
   2   5  -2  139.59   10.60
   2   5  -2  188.18    8.60
   2   5  -2  156.18    8.70
  -2   5   2  155.58    8.30
  -1  -5   2  119.19    6.60
  -1  -5   2  125.69    6.40
   1  -5  -2  115.89    6.50
   1  -5  -2  135.59    7.10
   1   5  -2  124.89    7.30
  -1   5   2  119.79    6.60
  -1   5   2  139.29    9.20
   1   5  -2  121.89    7.20
  -1   5   2  122.19    7.10
   1   5  -2  102.49    8.40
   0  -5  -2  814.42   31.00
   0  -5   2  717.83   31.10
   0  -5  -2  709.83   31.10
   0  -5  -2  750.72   31.80
   0   5   2  748.33   31.90
   0   5  -2  719.73   31.60
   0   5  -2  767.42   31.30
   0   5  -2  739.23   31.40
   0   5   2  740.73   31.30
   0   5  -2  718.33   31.30
   1  -5   2  337.97   14.80
  -1  -5  -2  336.37   15.60
   1  -5   2  346.77   15.60
  -1  -5  -2  335.97   14.90
   1  -5   2  330.37   14.70
  -1   5  -2  327.77   14.90
  -1   5  -2  312.97   14.70
   1   5   2  331.37   15.00
  -1   5  -2  368.16   15.70
   1   5   2  315.27   15.70
   1   5   2  333.67   14.20
  -2  -5  -2    4.90    2.40
  -2  -5  -2    4.40    3.20
   2  -5   2    6.40    3.10
   2  -5   2    3.50    3.40
   2   5   2    7.70    2.60
  -2   5  -2    2.10    1.50
   2   5   2    0.10    3.40
  -2   5  -2    7.00    5.00
   2   5   2    6.10    2.00
  -2   5  -2    8.30    2.50
   3  -5   2  392.36   18.70
  -3  -5  -2  404.96   17.80
  -3  -5  -2  388.86   18.80
   3  -5   2  381.56   18.70
   3   5   2  442.26   17.40
   3   5   2  425.56   18.00
  -3   5  -2  386.96   17.70
   3   5   2  378.46   19.20
  -3   5  -2  371.36   17.00
  -3   5  -2  420.26   20.20
   4  -5   2  444.96   20.40
   4  -5   2  438.66   21.60
  -4  -5  -2  438.26   19.70
  -4  -5  -2  421.96   21.60
   4  -5   2  462.05   19.10
  -4   5  -2  428.86   19.70
   4   5   2  461.05   20.00
  -4   5  -2  436.06   23.30
  -4   5  -2  403.16   19.10
   4   5   2  416.76   21.90
   4   5   2  470.45   19.70
  -5  -5  -2   13.60    4.30
   5  -5   2   13.60    5.70
   5  -5   2   19.50    8.50
   5   5   2    3.10    5.70
  -5   5  -2   14.10    4.80
   5   5   2   12.10    5.20
  -5   5  -2  -11.10   10.90
  -6  -5  -2   76.09   11.40
   6  -5   2  104.09   10.10
   6  -5   2   89.49    9.40
   6   5   2   64.69   10.20
   6   5   2   95.79   10.00
   7  -5   2   58.59   10.60
  -7  -5  -2   50.89   10.40
   7  -5   2   64.49    8.90
  -7  -5  -2   65.29    7.60
   7  -5   2   74.79    9.00
  -7   5  -2   39.30   11.50
  -7   5  -2   73.29    8.00
   7   5   2   71.89    8.40
   7   5   2   57.39    9.10
   7   5   2   40.40   10.00
  -8  -5  -2   -2.20    7.20
   8  -5   2    7.00    7.20
   8  -5   2    0.80    5.20
  -8  -5  -2    8.20    4.50
   8  -5   2    0.30    5.50
   8   5   2   -0.20    6.10
  -8   5  -2    5.80    4.70
   8   5   2   -1.30    4.70
  -8   5  -2   -8.80    8.50
   8   5   2   -2.70    8.30
   9  -5   2   94.79   10.40
  -9  -5  -2   99.29    9.20
   9  -5   2   99.79   11.50
  -9  -5  -2  100.39   13.10
   9   5   2   89.69    9.80
  -9   5  -2  106.79    9.70
  -9   5  -2   93.69   16.30
   9   5   2   88.99   17.20
   9   5   2  102.89   10.80
 -10  -5  -2    5.50    9.20
  10  -5   2   21.00    8.10
  10  -5   2   22.00   10.30
  10  -5   2   15.50    6.70
 -10  -5  -2   20.90    6.20
  10   5   2   23.40    6.40
  10   5   2    7.40    7.90
 -10   5  -2    7.30   10.50
  10   5   2   14.20   12.20
 -10   5  -2   16.20    6.00
  11  -5   2    0.60    6.60
  11  -5   2    3.50    8.90
 -11  -5  -2    6.80    9.90
  11  -5   2   11.10   11.00
  11   5   2   -6.50    6.10
 -11   5  -2   12.80    7.90
  11   5   2    4.50   11.90
 -11   5  -2    0.80   11.60
  12  -5   2   33.10   10.50
 -12  -5  -2   49.80    8.10
  12  -5   2   58.69   13.10
 -12  -5  -2   36.70   12.10
  12  -5   2   37.20    8.30
  12   5   2   32.20    7.60
  12   5   2   17.80   13.40
 -12   5  -2   38.50   13.50
 -12   5  -2   42.80    8.50
  12   5   2   46.50   10.40
  13  -5   2   -6.20    7.10
  13  -5   2   11.00   10.80
 -13  -5  -2    6.80   12.50
  13  -5   2    5.50   10.10
 -13  -5  -2    9.60    6.80
  13   5   2    9.50    9.50
 -13   5  -2   31.00   14.20
  13   5   2    4.00   14.80
 -13   5  -2   11.50    7.10
  13   5   2   -1.20    6.90
  14  -5   2   -0.80   10.40
  14  -5   2   16.70   12.70
 -14  -5  -2    5.70    7.30
 -14  -5  -2   20.00   11.80
  14   5   2   35.90   10.40
 -14   5  -2   26.50    7.50
 -14   5  -2   48.70   15.00
  14   5   2  -12.90   15.00
 -15  -5  -2   20.70   11.70
 -15  -5  -2   -7.70    7.00
  15  -5   2    8.60   11.50
 -15   5  -2    8.60    7.10
  15   5   2  -12.20   15.80
 -15   5  -2   36.20   14.50
  15   5   2    9.90    9.20
 -16  -5  -2   27.40   11.80
  16  -5   2   -6.40   13.00
  16   5   2   20.40   10.20
 -17  -5  -2   32.60   12.10
  17   5   2    8.80   10.20
  17   6  -2    9.90    9.80
 -16  -6   2   -6.90    7.00
 -16  -6   2   32.80   12.30
  16  -6  -2   -7.70   11.20
  16   6  -2   -2.90    8.90
 -16   6   2   43.00   14.70
 -16   6   2    1.30    7.40
 -15  -6   2   25.70   11.80
 -15  -6   2    0.60    7.10
  15  -6  -2    0.30   12.40
  15   6  -2  -31.40   17.40
 -15   6   2   10.90    6.80
 -15   6   2   18.90   12.90
  15   6  -2    2.90    9.10
  14  -6  -2   32.50    8.90
 -14  -6   2   40.40   12.50
  14  -6  -2   21.10   11.50
 -14  -6   2   28.10    7.60
  14  -6  -2   22.10   13.30
 -14   6   2   32.40    8.10
 -14   6   2   52.79   15.80
  14   6  -2   22.50    8.90
  14   6  -2   17.70    8.30
  14   6  -2    5.10   15.80
  13  -6  -2   38.60   13.20
 -13  -6   2   38.50    7.80
  13  -6  -2   49.20    9.70
 -13  -6   2   62.29   13.30
  13  -6  -2   46.70   11.80
 -13   6   2   54.49   16.50
  13   6  -2   48.50   10.90
  13   6  -2   30.10   17.60
  13   6  -2   37.40   11.00
 -13   6   2   49.40    8.10
 -12  -6   2    6.50    6.60
 -12  -6   2   12.40   12.20
  12  -6  -2   11.90   11.10
  12  -6  -2   21.20   10.30
  12  -6  -2    6.60    7.80
  12   6  -2   18.20    9.40
  12   6  -2   21.60   14.50
 -12   6   2   19.70    7.50
  12   6  -2    2.80    7.50
 -12   6   2   11.90   15.00
 -11  -6   2   10.70   10.00
  11  -6  -2   17.70    7.60
  11  -6  -2   14.60    9.00
 -11  -6   2   11.10    6.40
  11  -6  -2   23.50    9.90
 -11   6   2   10.70   14.00
 -11   6   2   13.80    7.00
  11   6  -2   10.40    8.30
  11   6  -2    1.10    6.80
  11   6  -2   27.00   13.70
  10  -6  -2   -1.10    6.80
 -10  -6   2   -3.60    5.30
  10  -6  -2    0.70    8.50
 -10  -6   2   -5.90    9.80
  10  -6  -2   -3.30    7.60
  10   6  -2    7.30   13.50
 -10   6   2    1.90   13.00
  10   6  -2   -7.30    7.30
  10   6  -2   -9.30    6.00
 -10   6   2    5.10    5.90
   9  -6  -2    6.30    6.40
  -9  -6   2   10.00    5.10
   9  -6  -2    0.50   14.30
  -9  -6   2   -1.90    8.80
   9  -6  -2   12.30    7.00
   9   6  -2    7.60   10.60
  -9   6   2    9.10    5.20
  -9   6   2    9.20   11.00
   9   6  -2    1.80    6.40
   9   6  -2    4.80    5.50
  -8  -6   2   13.00    4.80
   8  -6  -2   11.30    6.30
  -8  -6   2    5.00    7.20
   8  -6  -2   10.20    7.20
   8  -6  -2    8.00    6.00
   8   6  -2    9.20    5.00
   8   6  -2    9.90   10.80
  -8   6   2    7.40   10.60
  -8   6   2    9.40    5.00
   8   6  -2    3.70    6.10
   7  -6  -2    1.10    6.00
   7  -6  -2   -6.50    6.90
   7  -6  -2    7.90    6.10
  -7  -6   2    3.70    4.40
  -7   6   2   -1.50    4.70
  -7   6   2   -1.50   12.20
   7   6  -2    2.10    5.50
   7   6  -2    8.70    9.80
   7   6  -2   -1.60    5.90
   6  -6  -2    8.80    6.10
  -6  -6   2    9.60    4.20
   6  -6  -2    5.30    7.50
   6  -6  -2   21.50    6.50
   6   6  -2    5.00    6.30
  -6   6   2   24.50   12.30
  -6   6   2    9.20    5.10
   6   6  -2    2.90   11.30
   6   6  -2   12.00    6.00
  -5  -6   2  221.98   12.30
   5  -6  -2  251.07   14.60
   5  -6  -2  232.38   15.00
   5  -6  -2  226.08   13.50
  -5   6   2  230.68   13.10
   5   6  -2  186.18   18.50
   5   6  -2  228.58   13.90
   5   6  -2  230.88   13.50
   4  -6  -2   29.70    6.60
  -4  -6   2   25.10    4.60
   4  -6  -2   29.50    5.70
   4   6  -2   22.80    5.30
   4   6  -2    9.60    8.30
  -4   6   2   25.90    4.60
   4   6  -2   33.70    5.50
   3  -6  -2 1036.40   44.00
   3  -6  -2 1030.10   43.50
  -3  -6   2 1053.39   44.00
  -3  -6   2 1040.00   43.50
   3  -6  -2 1010.90   44.10
   3   6  -2 1069.99   43.70
   3   6  -2 1006.80   43.70
  -3   6   2 1036.30   45.90
   3   6  -2 1029.10   45.30
  -3   6   2 1029.20   43.40
  -2  -6   2   76.99    5.60
  -2  -6   2   86.49    5.70
   2  -6  -2   79.79    6.00
   2  -6  -2   81.79    6.50
  -2   6   2   88.79    9.20
   2   6  -2   61.99    8.50
   2   6  -2   86.29    5.80
   2   6  -2   81.89    6.30
  -2   6   2   79.79    5.80
  -2   6   2   80.59    5.90
  -1  -6   2  444.36   19.00
   1  -6  -2  461.15   19.30
   1  -6  -2  411.66   19.10
  -1  -6   2  442.76   19.20
   1   6  -2  431.96   19.40
  -1   6   2  443.46   20.90
   1   6  -2  439.46   20.30
  -1   6   2  448.16   19.30
  -1   6   2  426.96   19.60
   1   6  -2  436.56   19.30
   0  -6  -2   80.79    5.40
   0  -6  -2   93.99    5.30
   0  -6   2   83.79    5.40
   0   6  -2   78.29    5.60
   0   6  -2   91.89    6.10
   0   6  -2   84.99    5.50
   0   6  -2   71.99    6.40
   0   6   2   83.49    5.60
   0   6   2   81.09    6.30
   1  -6   2  131.19    8.40
   1  -6   2  137.09    7.30
  -1  -6  -2  135.59    7.40
  -1  -6  -2  129.29    7.90
  -1   6  -2  121.99    7.30
   1   6   2  123.49    8.60
   1   6   2  143.49    7.50
   1   6   2  138.79    6.40
  -1   6  -2  137.89    8.50
  -1   6  -2  129.89    7.50
   2  -6   2  418.06   18.30
  -2  -6  -2  410.66   19.20
   2  -6   2  420.66   19.40
  -2  -6  -2  416.66   18.30
  -2   6  -2  395.46   17.60
   2   6   2  422.06   17.60
   2   6   2  419.26   18.40
  -2   6  -2  441.76   20.10
  -2   6  -2  399.36   18.30
   2   6   2  373.06   19.70
  -3  -6  -2   -0.50    4.50
   3  -6   2    9.50    5.60
   3  -6   2    9.30    3.90
  -3  -6  -2    4.00    3.30
  -3   6  -2    3.70    7.60
   3   6   2   -1.20    2.90
   3   6   2   -8.20    5.00
   3   6   2   -2.20    3.50
  -3   6  -2   -0.80    3.20
  -3   6  -2    6.70    2.90
  -4  -6  -2   24.50    4.70
   4  -6   2   24.10    7.30
   4  -6   2   20.50    5.60
  -4  -6  -2   13.80    7.00
   4   6   2   20.80    4.80
  -4   6  -2   18.20    4.60
  -4   6  -2   23.70   10.80
   4   6   2   15.50    4.70
   5  -6   2   22.20    8.00
  -5  -6  -2    9.70    4.90
   5  -6   2    9.50    6.00
   5  -6   2    7.80    4.10
  -5   6  -2    4.30    5.00
  -5   6  -2  -15.50   10.60
   5   6   2    6.30    5.40
   5   6   2   -0.40    5.30
  -6  -6  -2   19.70    4.90
   6  -6   2   20.80    8.00
  -6  -6  -2   -1.90    8.20
   6  -6   2   18.30    5.90
  -6   6  -2  -10.70   10.60
  -6   6  -2   17.00    5.10
   6   6   2    9.50    5.60
   6   6   2   19.80    5.50
   6   6   2    2.50    8.70
   7  -6   2   36.00    8.30
  -7  -6  -2   47.00    7.10
   7  -6   2   34.30    5.70
   7  -6   2   30.60    6.10
  -7  -6  -2   29.50    9.40
  -7   6  -2   46.90    7.40
   7   6   2   24.40    9.10
  -7   6  -2   21.80   10.80
   7   6   2   43.40    5.90
   7   6   2   35.80    6.40
   8  -6   2  130.09   12.60
  -8  -6  -2  125.69    9.50
  -8  -6  -2  104.99   12.30
   8  -6   2  114.49   10.30
   8  -6   2  122.29   10.40
   8   6   2  116.09   10.20
   8   6   2  115.89   16.60
  -8   6  -2  111.89   15.90
   8   6   2  111.99    9.60
  -8   6  -2  128.79    9.80
   9  -6   2   70.69   12.00
   9  -6   2   64.19    9.70
   9  -6   2   60.39   10.40
  -9  -6  -2   74.09    8.80
   9   6   2   74.89    9.90
  -9   6  -2   69.99    9.30
   9   6   2   60.99   11.60
  -9   6  -2   76.69   16.40
   9   6   2   66.79    8.80
  10  -6   2   13.20    6.80
  10  -6   2   19.20    7.60
 -10  -6  -2   34.10    6.70
  10  -6   2   22.40    9.60
 -10  -6  -2   22.80   10.00
  10   6   2    8.20    5.90
 -10   6  -2   24.10    6.70
 -10   6  -2   13.40   11.30
  10   6   2   18.90    7.70
  10   6   2   16.70   11.40
  11  -6   2  558.24   26.80
 -11  -6  -2  478.15   26.40
 -11  -6  -2  510.65   29.60
  11  -6   2  536.35   28.10
  11  -6   2  548.55   29.40
  11   6   2  552.94   34.60
  11   6   2  537.75   26.30
 -11   6  -2  505.85   32.70
 -11   6  -2  518.15   26.50
  11   6   2  501.45   29.20
  12  -6   2   64.99   13.10
  12  -6   2   91.89   11.90
 -12  -6  -2   83.59   11.30
  12  -6   2   94.39   15.50
 -12  -6  -2   78.49   15.10
  12   6   2   75.69   10.80
 -12   6  -2   71.29   16.10
 -12   6  -2   92.59   12.00
  12   6   2   86.79   17.40
  12   6   2   81.49   13.00
  13  -6   2  140.49   19.40
 -13  -6  -2  123.19   13.10
 -13  -6  -2  139.19   17.20
  13  -6   2  111.99   16.90
 -13   6  -2  149.59   19.30
  13   6   2  131.19   14.70
 -13   6  -2  161.28   14.10
  13   6   2  135.09   25.30
  13   6   2  129.99   12.40
  14  -6   2    5.30   12.30
 -14  -6  -2    2.00    7.00
  14  -6   2  -12.40    9.60
 -14  -6  -2   28.00   13.30
  14   6   2  -11.30   15.50
 -14   6  -2   25.90   12.20
  14   6   2   18.40    9.50
 -14   6  -2    4.10    7.30
  15  -6   2   46.00   13.10
  15  -6   2   18.20   11.50
 -15  -6  -2   36.90    8.60
 -15   6  -2   46.50    9.50
  15   6   2   41.60   10.80
  15   6   2   23.20   15.30
 -16  -6  -2   28.70   11.60
  16   6   2   20.30   10.20
  16  -7  -2  -16.90   12.60
 -16  -7   2   31.00   12.50
 -16  -7   2   -8.10    7.30
  16   7  -2   -6.20    9.00
 -16   7   2   -6.40    7.50
 -16   7   2   28.40   14.20
  15  -7  -2   30.90   11.70
 -15  -7   2   53.69    8.80
  15  -7  -2   56.39   15.30
  15   7  -2   51.59   10.70
  15   7  -2   23.60   19.10
 -15   7   2   63.99   10.10
  14  -7  -2   57.89   14.90
  14  -7  -2   67.59   12.80
  14  -7  -2   65.89   10.20
 -14  -7   2   78.39   11.40
 -14  -7   2   75.59   14.50
  14   7  -2   60.49    9.90
  14   7  -2   40.60   19.60
 -14   7   2   86.19   12.70
  14   7  -2   84.79   13.30
 -14   7   2   85.39   17.90
 -13  -7   2   -8.00    6.00
  13  -7  -2   -8.70    7.40
 -13  -7   2    1.70   10.30
  13  -7  -2   -2.50   10.50
  13   7  -2   -8.00    8.50
  13   7  -2  -10.20    6.80
  13   7  -2   -9.80   14.50
 -13   7   2    5.30    7.40
 -13   7   2   17.20   14.60
  12  -7  -2  -11.60    8.80
 -12  -7   2   -7.10    6.30
 -12  -7   2    3.40   11.80
  12  -7  -2   -4.50    9.90
  12  -7  -2   -5.70    7.50
 -12   7   2   -5.10   14.10
  12   7  -2   10.70   15.90
  12   7  -2  -13.30    6.80
  12   7  -2   -6.80    8.40
  11  -7  -2   25.20    8.30
 -11  -7   2   15.10    5.90
  11  -7  -2   31.10   11.80
 -11  -7   2   20.30   11.50
  11  -7  -2   17.00    9.20
 -11   7   2   14.90    7.10
  11   7  -2   14.80    7.40
  11   7  -2   18.00   15.60
 -11   7   2   15.10   12.90
  11   7  -2    5.30    8.10
 -10  -7   2  122.29   15.70
  10  -7  -2  128.19   12.80
  10  -7  -2  136.79   14.20
 -10  -7   2  110.89   10.00
  10  -7  -2  121.79   14.40
 -10   7   2  117.39   18.20
  10   7  -2  114.59   12.40
  10   7  -2  129.79   12.70
 -10   7   2  116.29   11.70
  10   7  -2  120.79   19.70
   9  -7  -2    6.40    9.10
   9  -7  -2    4.80    6.80
  -9  -7   2   -6.00    8.90
  -9  -7   2    7.90    5.10
   9  -7  -2    4.30    6.20
   9   7  -2    2.70    5.80
   9   7  -2   -1.70    6.20
  -9   7   2    5.10   13.40
  -9   7   2    2.90    5.40
   9   7  -2   12.40   12.40
   8  -7  -2  111.99   10.90
   8  -7  -2  102.49   10.60
   8  -7  -2  105.99   11.80
  -8  -7   2   98.79    8.80
  -8  -7   2   90.19   12.20
  -8   7   2   98.29   16.00
   8   7  -2   87.39   15.80
  -8   7   2   96.09    9.30
   8   7  -2   85.79    9.80
   8   7  -2  103.89    9.90
   7  -7  -2  818.82   35.60
  -7  -7   2  794.92   34.70
   7  -7  -2  778.22   35.30
  -7  -7   2  775.62   36.80
   7  -7  -2  758.42   36.30
  -7   7   2  785.12   40.50
   7   7  -2  781.42   35.30
   7   7  -2  789.62   39.70
  -7   7   2  777.12   34.60
   7   7  -2  795.82   35.30
  -6  -7   2  118.99    9.10
   6  -7  -2  114.19   11.60
   6  -7  -2  121.49   10.90
   6  -7  -2  121.79   10.70
   6   7  -2  103.39   15.40
  -6   7   2  134.09   19.40
  -6   7   2  119.49    9.70
   6   7  -2  120.19    9.60
   6   7  -2   94.39    9.70
  -5  -7   2   66.79    7.10
   5  -7  -2   77.29    8.70
  -5  -7   2   56.19    8.70
   5  -7  -2   71.29    9.70
   5   7  -2   52.69   11.10
  -5   7   2   72.09    8.50
   5   7  -2   80.49    9.70
   5   7  -2   59.79    7.70
  -4  -7   2   30.30    6.90
   4  -7  -2   50.39    8.50
  -4  -7   2   35.90    5.40
   4  -7  -2   31.90    6.20
  -4   7   2   39.30    5.80
   4   7  -2   23.30    6.10
   4   7  -2   25.40    5.90
   3  -7  -2   30.40    5.20
  -3  -7   2   27.40    4.50
  -3  -7   2   25.10    5.40
   3  -7  -2   39.00    7.00
   3   7  -2   28.80    5.40
   3   7  -2   31.80    5.90
  -3   7   2   37.40    5.10
   2  -7  -2   10.60    4.60
   2  -7  -2   -2.40    3.60
  -2  -7   2   -1.00    3.30
  -2  -7   2   -3.00    3.20
   2   7  -2   -5.10    3.70
  -2   7   2   -0.80    3.10
  -2   7   2    5.30    6.90
  -2   7   2   -2.50    3.50
   2   7  -2    0.40    3.80
   1  -7  -2  856.71   34.30
   1  -7  -2  772.92   34.10
  -1  -7   2  805.52   34.10
  -1  -7   2  829.22   34.00
  -1   7   2  788.82   34.20
   1   7  -2  795.52   34.40
  -1   7   2  760.82   34.50
   1   7  -2  798.42   34.20
   1   7  -2  790.12   35.20
  -1   7   2  834.32   36.30
   0  -7  -2 2476.95  106.09
   0  -7  -2 2814.72  105.99
   0  -7   2 2595.54  106.09
   0   7   2 2581.44  106.19
   0   7  -2 2503.75  106.49
   0   7  -2 2540.35  106.19
   0   7  -2 2498.05  106.19
   0   7   2 2537.15  106.69
   0   7  -2 2746.13  106.39
  -1  -7  -2   56.49    5.20
   1  -7   2   53.79    5.70
   1  -7   2   70.99    7.50
  -1  -7  -2   65.39    6.30
  -1   7  -2   58.79    5.50
   1   7   2   50.19    7.70
  -1   7  -2   78.79    7.80
   1   7   2   65.49    4.50
   1   7   2   60.89    6.00
  -1   7  -2   54.29    5.80
   2  -7   2    3.70    3.80
   2  -7   2    0.20    5.00
  -2  -7  -2   -4.20    4.20
  -2  -7  -2    2.80    3.50
   2   7   2    0.40    2.70
  -2   7  -2   12.90    6.90
  -2   7  -2   -2.40    2.90
   2   7   2    3.30    3.70
  -2   7  -2   -0.20    3.70
  -3  -7  -2  728.03   33.70
  -3  -7  -2  751.82   32.60
   3  -7   2  772.52   34.20
   3  -7   2  770.82   32.70
   3   7   2  797.72   31.80
  -3   7  -2  770.42   32.90
  -3   7  -2  728.43   32.60
   3   7   2  672.03   34.30
   3   7   2  772.72   32.70
  -3   7  -2  709.93   31.40
  -3   7  -2  797.02   35.90
  -4  -7  -2   -9.90    5.80
   4  -7   2    1.00    5.60
  -4  -7  -2    4.20    4.10
   4  -7   2    8.60    8.30
  -4   7  -2   -5.90    4.60
   4   7   2   -2.90    4.40
   4   7   2    1.40    5.00
  -4   7  -2   15.10   10.90
  -4   7  -2   -2.60    2.40
   5  -7   2  895.91   39.40
  -5  -7  -2  919.81   42.20
   5  -7   2  978.90   41.00
   5  -7   2  950.50   42.60
  -5  -7  -2  937.01   40.60
   5   7   2  972.10   40.20
   5   7   2  872.91   43.30
   5   7   2 1010.00   40.90
  -5   7  -2  948.41   44.40
  -5   7  -2  934.41   40.50
   6  -7   2 2020.70   85.99
   6  -7   2 2000.80   83.39
  -6  -7  -2 1973.40   85.99
   6  -7   2 2101.49   84.49
  -6  -7  -2 1969.00   84.19
   6   7   2 1925.91   86.59
   6   7   2 2082.69   84.39
  -6   7  -2 2063.89   87.19
   6   7   2 2067.29   83.99
  -6   7  -2 2014.50   84.29
  -7  -7  -2  455.05   25.30
   7  -7   2  524.05   23.90
   7  -7   2  495.95   25.60
  -7  -7  -2  493.15   23.40
   7  -7   2  514.25   22.80
  -7   7  -2  489.65   27.90
   7   7   2  506.05   23.40
   7   7   2  493.55   27.20
   7   7   2  503.15   23.70
  -7   7  -2  508.25   23.50
   8  -7   2   40.20    6.70
   8  -7   2   35.40    5.80
  -8  -7  -2   38.00    5.90
   8  -7   2   43.60   10.40
  -8  -7  -2   35.50    9.70
   8   7   2   32.70    6.60
  -8   7  -2   35.30   11.00
   8   7   2   34.70    6.00
  -8   7  -2   43.80    6.30
   8   7   2   30.20   10.80
   9  -7   2   35.00    6.60
  -9  -7  -2   37.10   11.90
   9  -7   2   41.10   10.70
   9  -7   2   27.30    6.60
   9   7   2   30.00   10.90
   9   7   2   29.10    7.10
   9   7   2   21.00    5.70
  -9   7  -2   45.60   12.40
  10  -7   2  397.86   21.70
  10  -7   2  418.46   25.60
 -10  -7  -2  390.86   21.20
  10  -7   2  430.96   22.00
 -10  -7  -2  394.36   26.10
 -10   7  -2  391.46   22.00
  10   7   2  404.76   21.60
  10   7   2  424.36   27.60
 -10   7  -2  404.86   27.60
  10   7   2  390.66   21.00
 -11  -7  -2   49.70    8.20
  11  -7   2   59.89   11.90
  11  -7   2   44.30    8.90
 -11  -7  -2   42.40   11.90
  11  -7   2   35.50    8.40
  11   7   2   33.60    7.40
 -11   7  -2   40.20   13.00
 -11   7  -2   47.90    8.60
  11   7   2   47.70    9.60
  11   7   2   52.79   14.00
  12  -7   2   -5.60    8.20
 -12  -7  -2    5.50   12.10
  12  -7   2  -11.90    6.90
  12  -7   2   10.70   12.10
 -12  -7  -2   -2.90    6.10
  12   7   2    1.40    8.50
  12   7   2    2.50   13.20
 -12   7  -2   -1.30    7.00
 -12   7  -2   -2.70   13.80
  12   7   2   -8.70    6.00
 -13  -7  -2  101.69   12.50
  13  -7   2   98.29   16.10
 -13  -7  -2  120.39   16.40
  13  -7   2   87.29   14.90
 -13   7  -2  138.99   21.50
  13   7   2   87.59   16.90
  13   7   2  107.19   13.60
 -13   7  -2  106.29   13.30
  14  -7   2  117.79   17.60
  14  -7   2  101.09   17.20
 -14  -7  -2  115.89   13.80
 -14  -7  -2  129.39   16.80
  14   7   2   88.79   18.90
  14   7   2  103.39   15.00
 -14   7  -2  110.99   14.00
 -14   7  -2  150.68   18.20
 -15  -7  -2    7.20    7.60
  15  -7   2   -5.00   12.90
  15   7   2    1.40    8.80
 -15   7  -2   -2.20    7.20
  15   7   2  -21.00   16.50
  16  -7   2   73.49   16.90
 -16  -7  -2  103.59   13.00
  16  -7   2   71.59   12.60
 -16   7  -2   86.59   13.40
  16   7   2   87.79   13.90
  16  -8  -2   21.50   15.00
 -16  -8   2   43.10    8.70
 -16   8   2   19.30    8.80
  16   8  -2   45.00   10.60
  15  -8  -2   18.10   14.30
 -15  -8   2   44.80    8.60
  15  -8  -2   22.10   10.60
 -15   8   2   60.39   14.50
 -15   8   2   36.80    9.10
  15   8  -2   36.30    9.90
  14  -8  -2  -10.00    9.00
 -14  -8   2   24.50   12.50
 -14  -8   2    6.90    7.40
  14  -8  -2  -15.50   12.00
 -14   8   2    7.80   12.60
  14   8  -2    6.50    8.30
 -14   8   2    0.80    7.00
  14   8  -2   -6.90    6.80
  14   8  -2  -12.50   15.60
  13  -8  -2   25.10   11.90
  13  -8  -2   46.10   10.80
 -13  -8   2   36.30    8.00
  13  -8  -2   25.20    8.60
 -13   8   2   47.20    9.20
  13   8  -2   43.90    8.90
  13   8  -2   31.10   16.40
 -13   8   2   55.49   14.80
  13   8  -2   38.80    9.90
  12  -8  -2  147.99   18.70
  12  -8  -2  151.28   15.80
 -12  -8   2  143.09   17.70
 -12  -8   2  137.89   15.20
  12  -8  -2  156.68   16.40
  12   8  -2  143.89   14.20
 -12   8   2  113.29   19.30
  12   8  -2  145.79   26.80
  12   8  -2  129.09   14.10
 -12   8   2  126.59   16.50
  11  -8  -2   12.10    8.20
 -11  -8   2   27.50   11.60
 -11  -8   2   22.00    6.80
  11  -8  -2    8.20   11.60
  11   8  -2   11.40    7.50
  11   8  -2   12.30    8.40
 -11   8   2   22.30    7.60
 -11   8   2   14.70   13.00
  11   8  -2   21.00   14.20
  10  -8  -2   24.30    8.00
 -10  -8   2   28.60    9.70
 -10  -8   2   22.60    6.70
  10  -8  -2   23.10   10.00
  10  -8  -2   18.20    7.50
  10   8  -2   27.40   14.50
 -10   8   2   31.50    7.40
  10   8  -2   18.40    6.70
 -10   8   2   28.90   15.00
  10   8  -2   32.80    8.40
   9  -8  -2   24.80   10.00
  -9  -8   2   25.60    9.70
   9  -8  -2   18.50    6.90
  -9  -8   2   19.70    6.00
   9  -8  -2   25.00    7.00
   9   8  -2   14.70    5.90
   9   8  -2   28.40   12.10
  -9   8   2   36.50   22.60
  -9   8   2   27.70    6.60
   9   8  -2   22.50    7.40
   8  -8  -2   39.80    7.30
  -8  -8   2   36.10    5.90
  -8  -8   2   45.40    9.40
   8  -8  -2   44.90    9.90
   8  -8  -2   52.89    9.20
  -8   8   2   42.00    6.40
  -8   8   2   43.20   13.70
   8   8  -2   40.50    7.30
   8   8  -2   39.40   11.20
   8   8  -2   39.90    6.90
  -7  -8   2    9.00    4.50
  -7  -8   2   11.20    7.40
   7  -8  -2   16.20    5.60
   7  -8  -2   20.00    6.10
   7  -8  -2   19.00    8.30
  -7   8   2   14.90    5.00
   7   8  -2    9.60   10.50
  -7   8   2   21.00   12.70
   7   8  -2   13.80    5.80
   7   8  -2   20.30    5.80
  -6  -8   2    5.90    6.80
  -6  -8   2   12.20    4.60
   6  -8  -2   15.70    5.20
   6  -8  -2   11.60    5.80
   6  -8  -2   24.20    8.10
  -6   8   2   14.00   10.90
  -6   8   2   14.50    5.00
   6   8  -2    7.80    4.90
   6   8  -2    8.30    5.40
   6   8  -2    8.50    9.10
  -5  -8   2  403.26   21.00
  -5  -8   2  408.76   19.80
   5  -8  -2  410.16   20.30
   5  -8  -2  440.06   22.00
   5   8  -2  373.06   23.80
   5   8  -2  424.36   20.70
   5   8  -2  407.56   19.90
  -5   8   2  448.36   26.70
  -5   8   2  417.36   20.10
   4  -8  -2 1896.11   76.89
   4  -8  -2 1826.82   75.99
  -4  -8   2 1781.72   75.69
  -4  -8   2 1802.42   76.59
  -4   8   2 1794.12   75.89
  -4   8   2 1823.92   79.09
   4   8  -2 1823.82   75.89
   4   8  -2 1807.32   76.19
   3  -8  -2  595.24   26.40
   3  -8  -2  617.34   27.20
  -3  -8   2  570.64   26.00
  -3  -8   2  570.64   26.30
   3   8  -2  576.54   26.00
  -3   8   2  570.14   25.80
   3   8  -2  527.35   28.60
  -3   8   2  631.54   30.30
  -3   8   2  552.24   25.80
   3   8  -2  577.94   26.70
  -2  -8   2 1353.26   56.79
  -2  -8   2 1363.36   56.79
   2  -8  -2 1331.07   56.89
   2  -8  -2 1468.95   57.29
   2   8  -2 1317.27   56.89
  -2   8   2 1322.67   56.69
   2   8  -2 1312.27   58.59
  -2   8   2 1302.17   56.79
   2   8  -2 1359.26   56.79
  -2   8   2 1417.06   59.29
   1  -8  -2  871.31   38.10
   1  -8  -2  952.10   38.20
  -1  -8   2  881.71   37.90
  -1  -8   2  914.71   37.80
   1   8  -2  880.91   38.00
  -1   8   2  856.91   38.50
  -1   8   2  886.01   38.10
   1   8  -2  852.01   38.20
  -1   8   2  942.01   40.50
   1   8  -2  858.51   39.40
   0  -8  -2  303.57   13.60
   0  -8   2  270.07   13.60
   0  -8  -2  256.07   13.60
   0   8  -2  281.97   15.00
   0   8  -2  270.67   13.60
   0   8   2  245.48   14.80
   0   8  -2  253.37   13.90
   0   8  -2  235.08   14.90
   0   8   2  268.37   13.70
   1  -8   2 1099.39   46.90
   1  -8   2 1195.08   48.00
  -1  -8  -2 1097.99   47.00
  -1  -8  -2 1115.09   47.80
  -1   8  -2 1040.90   47.00
   1   8   2 1117.09   47.00
  -1   8  -2 1183.38   47.90
   1   8   2 1066.69   48.00
  -1   8  -2 1099.29   47.10
   2  -8   2 1445.06   59.89
  -2  -8  -2 1417.66   60.89
  -2  -8  -2 1389.56   59.79
   2  -8   2 1473.75   60.99
   2   8   2 1472.85   59.09
   2   8   2 1441.66   59.89
  -2   8  -2 1350.76   59.39
   2   8   2 1355.86   61.19
  -2   8  -2 1421.86   59.99
  -2   8  -2 1548.84   61.59
  -3  -8  -2  275.77   16.20
   3  -8   2  305.07   16.50
   3  -8   2  316.87   15.10
  -3  -8  -2  287.87   14.90
   3   8   2  231.18   18.60
  -3   8  -2  260.57   13.60
  -3   8  -2  274.27   15.10
   3   8   2  295.97   13.80
  -3   8  -2  341.67   20.40
   3   8   2  285.47   15.20
   4  -8   2 1098.59   46.20
  -4  -8  -2  977.60   44.20
  -4  -8  -2 1019.40   45.80
  -4   8  -2 1097.09   47.50
   4   8   2  972.70   46.60
  -4   8  -2 1011.70   44.40
   4   8   2 1073.29   44.60
  -4   8  -2 1017.20   42.90
   4   8   2 1061.09   43.60
   5  -8   2 1045.90   45.80
  -5  -8  -2  980.10   45.30
  -5  -8  -2  981.20   43.80
   5  -8   2 1085.59   44.20
  -5   8  -2  987.20   47.00
   5   8   2 1048.10   43.30
  -5   8  -2 1010.80   44.00
   5   8   2  988.90   47.00
   5   8   2 1074.39   44.10
  -5   8  -2 1002.30   42.20
   6  -8   2   -0.60    5.20
  -6  -8  -2  -10.90    6.60
   6  -8   2    7.80    7.80
  -6  -8  -2    1.80    4.40
   6   8   2   -1.30    4.60
  -6   8  -2   -1.90    4.50
  -6   8  -2   -1.80    9.80
   6   8   2   -7.80    8.60
   6   8   2    2.10    4.40
   7  -8   2   79.59    9.20
  -7  -8  -2   72.19   10.10
   7  -8   2   73.29    6.70
   7  -8   2   74.19   12.30
  -7  -8  -2   73.19    8.10
   7   8   2   75.99   13.10
  -7   8  -2   72.89   12.10
  -7   8  -2   76.89    8.60
   7   8   2   76.39    8.40
   7   8   2   72.99    8.60
   8  -8   2   16.00   11.30
  -8  -8  -2   17.00    5.40
   8  -8   2   17.70    6.20
  -8  -8  -2   22.90    9.30
   8  -8   2   15.40    4.70
  -8   8  -2   11.00    9.50
   8   8   2   19.50    5.30
  -8   8  -2   17.30    5.70
   8   8   2   13.10   10.50
   8   8   2   15.70    5.90
   9  -8   2   19.70    9.50
   9  -8   2   19.80    5.60
   9  -8   2   17.00    6.80
  -9  -8  -2   11.30    8.70
  -9  -8  -2   20.90    6.20
   9   8   2   14.00   10.80
   9   8   2   15.70    5.90
  -9   8  -2   15.40   11.90
   9   8   2   25.10    6.80
  -9   8  -2   18.20    6.50
  10  -8   2  133.59   13.70
 -10  -8  -2  142.19   17.10
  10  -8   2  176.88   18.10
 -10  -8  -2  123.39   13.40
  10  -8   2  147.09   12.30
 -10   8  -2  121.69   19.00
  10   8   2  135.39   13.10
  10   8   2  144.39   19.90
 -10   8  -2  148.29   17.90
  10   8   2  138.19   12.10
  11  -8   2   22.40   12.20
 -11  -8  -2   14.80    6.70
 -11  -8  -2   15.30   10.50
  11  -8   2    7.40    7.40
  11  -8   2   15.30    7.30
  11   8   2   14.50    8.30
  11   8   2   14.30    6.70
 -11   8  -2   14.90   13.80
  11   8   2   20.00   13.30
 -11   8  -2   15.60    7.50
 -12  -8  -2  181.98   14.50
  12  -8   2  179.28   15.30
 -12  -8  -2  182.78   19.90
  12  -8   2  177.48   15.90
  12  -8   2  200.38   20.60
 -12   8  -2  188.08   15.50
  12   8   2  178.98   15.00
  12   8   2  195.18   23.20
 -12   8  -2  207.58   22.80
  12   8   2  171.58   14.30
 -13  -8  -2    9.50   12.00
  13  -8   2    2.00   12.60
 -13  -8  -2   -1.40    6.80
 -13   8  -2   23.70   14.40
 -13   8  -2   11.30    8.10
  13   8   2    0.20    5.20
  13   8   2    5.80    8.10
  13   8   2    1.30   14.10
 -14  -8  -2  192.48   19.90
  14  -8   2  138.99   16.00
 -14  -8  -2  143.79   14.40
  14  -8   2  159.38   18.70
  14   8   2  155.18   15.80
 -14   8  -2  161.38   15.60
  14   8   2  113.79   21.30
 -14   8  -2  199.18   20.10
 -15  -8  -2  209.58   18.60
  15  -8   2  157.98   16.70
 -15  -8  -2  170.88   15.30
  15  -8   2  178.98   22.30
 -15   8  -2  171.78   16.50
  15   8   2  188.08   16.10
  16  -9  -2   -9.60   13.50
 -16  -9   2    7.20    6.90
  16   9  -2   14.60    9.20
 -16   9   2    2.30    8.10
  15  -9  -2   29.00    9.80
  15  -9  -2   32.60   14.80
 -15  -9   2   20.60    7.70
 -15   9   2   17.40    8.20
  15   9  -2   46.60   10.40
  14  -9  -2   73.49   11.60
  14  -9  -2   58.99   15.00
 -14  -9   2   96.29   16.80
 -14  -9   2   68.69   11.30
  14  -9  -2   67.69   11.40
  14   9  -2   44.10    8.20
  14   9  -2   53.59   17.90
  14   9  -2   72.59   11.40
 -14   9   2   58.09    9.80
 -13  -9   2   37.20    8.20
  13  -9  -2   13.70   11.40
  13  -9  -2   25.60    9.10
 -13  -9   2   42.90   12.50
  13  -9  -2   29.40    9.40
 -13   9   2   39.70   15.40
  13   9  -2   25.80    9.10
  13   9  -2   21.10    7.90
 -13   9   2   37.30    8.90
  13   9  -2   27.90   16.60
 -12  -9   2   39.70   11.00
  12  -9  -2   28.00    8.90
  12  -9  -2   16.80    9.40
 -12  -9   2   24.10    9.30
  12  -9  -2   23.90   12.70
  12   9  -2   21.70   17.40
 -12   9   2   15.90    7.80
  12   9  -2   26.20    9.30
 -12   9   2   30.80   13.60
  12   9  -2   15.30    7.50
 -11  -9   2  281.87   17.10
  11  -9  -2  260.87   20.60
  11  -9  -2  263.57   19.10
 -11  -9   2  254.07   20.80
  11  -9  -2  245.48   20.10
  11   9  -2  286.27   26.30
 -11   9   2  255.27   16.60
 -11   9   2  242.78   23.20
  11   9  -2  272.07   17.70
  11   9  -2  241.48   17.30
  10  -9  -2   18.30    7.80
  10  -9  -2   21.00   11.40
  10  -9  -2   25.40    7.60
 -10  -9   2   15.20    6.30
 -10  -9   2   27.10   11.20
 -10   9   2   33.30   15.20
 -10   9   2   14.00    6.50
  10   9  -2   25.20   14.90
  10   9  -2   19.20    8.20
  10   9  -2    7.60    6.60
  -9  -9   2  158.68   12.10
   9  -9  -2  159.78   13.30
   9  -9  -2  146.69   15.20
  -9  -9   2  159.68   16.30
   9  -9  -2  162.88   14.30
   9   9  -2  138.39   12.70
   9   9  -2  154.58   12.50
  -9   9   2  160.88   22.30
   9   9  -2  162.78   20.20
  -9   9   2  147.59   12.60
   8  -9  -2   53.69    9.30
   8  -9  -2   58.29    8.20
   8  -9  -2   50.99   17.10
  -8  -9   2   51.69   10.00
  -8  -9   2   46.40    6.80
   8   9  -2   47.40    7.50
  -8   9   2   65.89    9.00
   8   9  -2   45.90   11.80
  -8   9   2   49.99   13.10
   8   9  -2   42.50    7.40
  -7  -9   2   79.89   10.80
  -7  -9   2   93.29    8.60
   7  -9  -2   96.39    9.30
   7  -9  -2   90.99   12.60
   7  -9  -2   87.79   10.30
   7   9  -2   95.99    9.40
   7   9  -2   91.49   17.00
   7   9  -2   93.99    9.90
  -7   9   2   95.39   16.00
  -7   9   2   99.29    8.60
   6  -9  -2  330.17   16.90
   6  -9  -2  312.97   18.30
  -6  -9   2  282.47   17.30
   6  -9  -2  296.27   15.90
  -6  -9   2  303.07   15.80
  -6   9   2  299.27   23.10
   6   9  -2  291.77   20.30
   6   9  -2  315.77   16.10
   6   9  -2  294.07   16.50
  -6   9   2  303.87   16.10
  -5  -9   2   86.89    8.10
   5  -9  -2  108.39   11.40
  -5  -9   2   75.39    9.20
   5   9  -2   81.09    8.60
   5   9  -2   82.69    8.50
   5   9  -2   83.29   13.20
  -5   9   2   93.99    8.70
  -5   9   2  101.49   14.60
   4  -9  -2  235.48   14.60
   4  -9  -2  214.48   13.00
  -4  -9   2  210.38   12.40
  -4  -9   2  213.98   12.80
   4   9  -2  220.68   12.60
   4   9  -2  203.48   13.30
  -4   9   2  244.48   19.00
   4   9  -2  183.38   17.80
  -4   9   2  222.18   12.80
  -4   9   2  211.78   11.90
   3  -9  -2  503.85   23.30
  -3  -9   2  493.05   22.90
  -3  -9   2  493.15   23.10
   3  -9  -2  528.25   24.20
   3   9  -2  495.55   23.70
  -3   9   2  499.65   23.20
  -3   9   2  520.05   27.20
  -3   9   2  464.95   22.70
   3   9  -2  512.55   23.10
   3   9  -2  465.15   26.60
  -2  -9   2  181.48   10.50
  -2  -9   2  161.88   10.70
   2  -9  -2  180.78   11.80
   2  -9  -2  177.78   11.20
  -2   9   2  205.08   17.40
   2   9  -2  166.88   10.70
   2   9  -2  165.08   11.70
  -2   9   2  166.08   11.10
   2   9  -2  124.99   15.10
  -2   9   2  136.69   10.60
  -1  -9   2  656.73   29.50
  -1  -9   2  697.83   29.60
   1  -9  -2  766.22   30.20
   1  -9  -2  663.93   29.90
  -1   9   2  646.14   30.60
   1   9  -2  658.53   29.70
   1   9  -2  639.44   30.10
   1   9  -2  630.44   32.00
  -1   9   2  658.43   29.90
  -1   9   2  721.73   33.00
   0  -9   2 1390.66   58.59
   0  -9  -2 1329.87   58.39
   0  -9  -2 1524.95   58.49
   0   9   2 1477.35   61.19
   0   9  -2 1366.66   58.79
   0   9  -2 1494.95   59.39
   0   9   2 1382.86   58.59
   0   9   2 1276.97   59.29
   0   9  -2 1304.67   59.29
   1  -9   2  106.89    9.20
  -1  -9  -2  107.39    8.50
   1  -9   2  116.29   11.10
  -1  -9  -2  122.69    9.80
   1   9   2  122.29    9.80
  -1   9  -2  144.59   12.50
  -1   9  -2  100.29    9.70
   2  -9   2  263.67   13.80
  -2  -9  -2  267.57   14.70
  -2  -9  -2  255.67   13.80
   2  -9   2  281.07   15.90
   2   9   2  215.38   15.80
  -2   9  -2  229.08   13.40
  -2   9  -2  257.97   14.20
   2   9   2  255.77   14.20
   2   9   2  266.97   12.40
  -3  -9  -2 1108.89   47.20
   3  -9   2 1120.49   46.00
   3  -9   2 1126.59   47.50
  -3  -9  -2 1053.99   45.90
   3   9   2 1082.79   45.00
  -3   9  -2 1050.49   46.00
   3   9   2  978.00   47.70
  -3   9  -2 1010.50   45.00
  -3   9  -2 1142.49   48.50
   3   9   2 1087.69   46.10
   4  -9   2  877.11   38.60
  -4  -9  -2  834.02   36.80
  -4  -9  -2  836.72   38.20
   4  -9   2  887.41   36.90
   4   9   2  887.81   37.00
  -4   9  -2  838.22   39.70
   4   9   2  861.71   35.90
  -4   9  -2  787.52   35.30
  -4   9  -2  825.62   36.90
   4   9   2  798.22   39.50
   5  -9   2   38.80    8.60
  -5  -9  -2   30.70    7.60
  -5  -9  -2   33.10    5.40
   5  -9   2   31.10    5.70
   5   9   2   35.90    5.80
  -5   9  -2   30.00    4.10
   5   9   2   17.30    9.10
  -5   9  -2   27.20    5.50
  -5   9  -2   38.90   10.60
   5   9   2   35.70    5.00
  -6  -9  -2  705.53   31.90
   6  -9   2  737.03   32.10
  -6  -9  -2  690.33   33.90
   6  -9   2  734.53   34.30
  -6   9  -2  688.73   29.90
   6   9   2  717.63   31.20
   6   9   2  709.13   32.00
  -6   9  -2  734.63   35.70
  -6   9  -2  703.13   31.70
   6   9   2  695.43   35.00
  -7  -9  -2  242.28   16.30
   7  -9   2  256.37   14.90
   7  -9   2  256.07   16.90
  -7  -9  -2  224.98   14.10
  -7   9  -2  258.77   14.70
   7   9   2  242.38   14.40
  -7   9  -2  252.87   19.80
   7   9   2  244.98   18.60
   7   9   2  266.67   14.00
  -8  -9  -2  113.09   14.00
  -8  -9  -2  123.49   10.70
   8  -9   2  125.09   11.60
   8  -9   2  124.89    8.60
   8  -9   2  134.29   15.40
  -8   9  -2  131.19   11.20
   8   9   2  129.99   10.40
   8   9   2  122.59   10.50
  -8   9  -2  102.49   17.30
   8   9   2  117.89   16.30
   9  -9   2  185.78   15.40
   9  -9   2  216.68   17.80
  -9  -9  -2  215.38   18.00
  -9  -9  -2  206.28   14.20
   9  -9   2  221.98   12.60
   9   9   2  205.78   20.30
   9   9   2  217.18   14.10
  -9   9  -2  223.18   14.70
   9   9   2  202.78   14.50
  -9   9  -2  198.78   32.30
 -10  -9  -2  420.06   29.50
  10  -9   2  481.95   28.90
 -10  -9  -2  468.45   27.30
  10  -9   2  473.55   23.10
  10  -9   2  468.95   25.30
 -10   9  -2  484.45   30.50
  10   9   2  475.15   24.30
  10   9   2  449.06   23.80
 -10   9  -2  486.05   24.80
  10   9   2  505.65   32.60
  11  -9   2   18.00    6.50
  11  -9   2   30.10   13.00
 -11  -9  -2   20.40    6.80
 -11  -9  -2   21.50   10.30
  11  -9   2   19.60    7.80
  11   9   2   24.70   15.10
 -11   9  -2    9.80   13.70
 -11   9  -2   22.50    7.80
  11   9   2   15.20    7.90
  11   9   2   19.00    7.20
  12  -9   2  199.18   15.40
 -12  -9  -2  240.58   20.90
 -12  -9  -2  213.88   15.80
  12  -9   2  234.38   22.00
  12  -9   2  181.68   16.00
 -12   9  -2  227.78   16.80
 -12   9  -2  246.78   23.40
  12   9   2  205.98   24.50
  12   9   2  201.18   15.70
  12   9   2  201.48   15.40
 -13  -9  -2  574.04   34.20
  13  -9   2  550.64   34.60
  13  -9   2  614.04   29.10
 -13  -9  -2  566.14   29.40
  13   9   2  528.65   36.90
 -13   9  -2  604.74   30.30
 -13   9  -2  609.74   36.00
  13   9   2  519.55   29.70
 -14  -9  -2  194.18   20.10
 -14  -9  -2  133.79   14.60
  14  -9   2  151.28   19.10
 -14   9  -2  172.48   15.80
  14   9   2  130.09   25.10
 -14   9  -2  192.48   19.60
  14   9   2  177.38   15.80
  15  -9   2   30.30   13.10
 -15  -9  -2    9.40    7.50
 -15   9  -2   11.90    8.90
  15   9   2   19.30    8.40
  16  -9   2   74.49   17.40
 -16  -9  -2   76.49   10.80
  16   9   2  111.29   13.80
 -16   9  -2   44.10    9.90
 -16 -10   2   30.60    8.90
  16 -10  -2   24.70   13.60
  16  10  -2   42.60    9.50
 -16  10   2   25.90    9.10
 -15 -10   2    2.90    7.40
  15 -10  -2    8.30   13.80
 -15 -10   2   39.00   12.10
  15  10  -2   21.40    8.60
 -15  10   2   51.39   15.30
 -15  10   2   -0.60    7.80
 -14 -10   2   24.10   11.30
 -14 -10   2   -1.30    6.80
  14 -10  -2  -12.70   12.80
  14  10  -2    9.50    8.60
 -14  10   2   36.60   15.20
 -14  10   2    0.50    7.80
  13 -10  -2   39.00   12.90
  13 -10  -2   44.80    9.40
 -13 -10   2   49.80    8.50
  13 -10  -2   33.80    9.30
 -13 -10   2   59.89   13.10
  13  10  -2   36.50    9.70
 -13  10   2   54.49   16.40
  13  10  -2   25.20   16.60
 -13  10   2   42.60    9.00
  13  10  -2   57.89    9.10
 -12 -10   2  284.97   18.20
  12 -10  -2  288.57   23.80
 -12 -10   2  297.47   22.20
  12 -10  -2  287.47   21.00
  12 -10  -2  264.57   20.10
  12  10  -2  297.27   19.10
 -12  10   2  288.67   19.10
  12  10  -2  302.17   18.90
 -12  10   2  271.17   26.50
  12  10  -2  276.57   31.20
  11 -10  -2  188.08   16.10
  11 -10  -2  149.88   14.00
 -11 -10   2  151.68   15.70
 -11 -10   2  161.28   13.80
  11 -10  -2  156.48   19.30
 -11  10   2  162.48   17.20
  11  10  -2  153.28   23.10
  11  10  -2  160.98   15.00
  11  10  -2  166.58   15.60
 -11  10   2  154.68   20.50
  10 -10  -2  215.78   18.60
  10 -10  -2  229.98   16.70
 -10 -10   2  198.68   14.10
  10 -10  -2  226.28   15.50
 -10 -10   2  204.58   18.40
 -10  10   2  212.88   25.20
  10  10  -2  224.68   15.90
  10  10  -2  202.78   23.60
  10  10  -2  200.48   15.90
 -10  10   2  251.87   16.10
   9 -10  -2   34.70    7.00
   9 -10  -2   37.60   10.40
   9 -10  -2   43.40    8.60
  -9 -10   2   37.70    6.90
  -9  10   2   35.00    7.60
   9  10  -2   41.70    8.20
  -9  10   2   34.80   15.40
   9  10  -2   35.20    7.10
   9  10  -2   33.80   14.40
  -8 -10   2    2.60    4.80
   8 -10  -2    2.60    6.80
   8 -10  -2    6.90    5.40
   8 -10  -2   14.10    9.70
  -8 -10   2    4.90    7.80
   8  10  -2    5.20    6.00
  -8  10   2   18.20   12.60
   8  10  -2   -4.40    6.20
   8  10  -2    1.30   10.80
  -8  10   2    3.70    5.80
   7 -10  -2   40.90    7.40
   7 -10  -2   42.40    7.70
   7 -10  -2   47.70   10.10
  -7 -10   2   42.90    8.70
  -7 -10   2   44.80    6.40
   7  10  -2   43.10    7.00
  -7  10   2   41.50    6.50
  -7  10   2   32.60   12.20
   7  10  -2   29.80    6.70
   7  10  -2   35.70   11.70
  -6 -10   2  277.87   15.70
   6 -10  -2  298.67   16.70
  -6 -10   2  290.97   17.20
   6 -10  -2  309.27   18.50
   6  10  -2  308.07   16.00
   6  10  -2  297.87   16.70
  -6  10   2  312.47   16.30
   6  10  -2  280.97   20.40
  -6  10   2  314.97   23.40
  -5 -10   2  420.96   21.50
   5 -10  -2  436.06   22.40
  -5 -10   2  416.86   20.40
   5 -10  -2  426.16   20.90
  -5  10   2  425.06   25.90
  -5  10   2  425.56   20.60
   5  10  -2  409.46   20.60
  -5  10   2  413.06   19.60
   5  10  -2  415.26   20.30
   5  10  -2  436.16   25.10
   4 -10  -2   15.90    4.90
  -4 -10   2   17.80    4.80
  -4 -10   2   16.90    5.30
   4 -10  -2   15.70    7.10
  -4  10   2   15.60    5.00
   4  10  -2   13.50    7.90
  -4  10   2   24.80   10.50
   4  10  -2   16.70    5.10
  -4  10   2   12.10    4.00
   4  10  -2   12.80    5.50
  -3 -10   2   31.20    5.40
   3 -10  -2   38.80    5.90
  -3 -10   2   31.00    6.40
   3 -10  -2   39.90    7.30
  -3  10   2   27.80    5.10
  -3  10   2   32.50    5.20
   3  10  -2   40.50    5.80
   3  10  -2   31.00    6.00
   3  10  -2   23.30    8.60
  -3  10   2   60.99   13.20
   2 -10  -2 1508.55   64.49
   2 -10  -2 1631.54   64.99
  -2 -10   2 1519.85   64.49
  -2 -10   2 1543.95   64.39
   2  10  -2 1458.65   66.09
  -2  10   2 1465.35   64.69
   2  10  -2 1523.55   64.69
   2  10  -2 1528.25   64.39
  -2  10   2 1622.04   67.49
  -2  10   2 1551.14   64.49
   1 -10  -2  424.46   20.40
  -1 -10   2  403.16   19.90
   1 -10  -2  479.35   20.90
  -1  10   2  400.66   21.00
   1  10  -2  423.96   20.80
  -1  10   2  452.45   23.90
  -1  10   2  431.06   20.50
   1  10  -2  406.66   22.40
   1  10  -2  432.76   20.30
   0 -10  -2  137.59   10.00
   0 -10   2  128.69    9.80
   0 -10  -2  154.78   10.10
   0  10  -2  104.89   12.10
   0  10   2  125.99   15.20
   0  10  -2  162.28   12.10
   0  10   2  105.49   11.60
   0  10   2  144.39   10.10
   0  10  -2  136.49   10.50
   1 -10   2 2761.62  107.79
  -1 -10  -2 2478.35  106.89
   1 -10   2 2555.34  106.79
  -1 -10  -2 2934.91  106.69
  -1 -10  -2 2527.75  107.69
  -1  10  -2 2537.25  106.99
  -1  10  -2 2656.63  107.69
  -1  10  -2 2455.25  106.89
   1  10   2 2529.85  106.89
   1  10   2 2441.56  107.99
   2 -10   2  732.53   32.30
  -2 -10  -2  677.23   30.90
   2 -10   2  694.43   30.80
  -2 -10  -2  697.03   31.80
  -2  10  -2  687.33   31.10
  -2  10  -2  668.53   30.60
   2  10   2  702.73   31.10
  -2  10  -2  739.03   32.80
   2  10   2  647.74   33.40
   2  10   2  720.33   29.80
   3 -10   2   17.50    6.60
  -3 -10  -2   18.60    5.90
   3 -10   2   17.00    4.90
  -3 -10  -2   18.80    4.80
   3  10   2   25.70    4.00
  -3  10  -2   28.80    9.30
  -3  10  -2   12.90    5.20
  -3  10  -2   18.90    4.10
   3  10   2   15.50    5.00
   3  10   2   11.70    7.70
   4 -10   2  733.53   32.00
   4 -10   2  738.43   33.50
  -4 -10  -2  727.93   33.60
  -4 -10  -2  699.63   31.80
  -4  10  -2  716.53   30.70
   4  10   2  727.53   32.20
  -4  10  -2  721.23   34.90
  -4  10  -2  730.23   32.00
   4  10   2  677.13   34.20
   4  10   2  734.63   31.00
   5 -10   2  528.65   26.30
  -5 -10  -2  515.15   25.80
  -5 -10  -2  496.45   23.90
   5 -10   2  518.25   24.20
  -5  10  -2  510.95   24.10
   5  10   2  518.15   23.10
   5  10   2  525.95   24.30
  -5  10  -2  505.75   28.40
  -5  10  -2  502.85   22.10
   5  10   2  514.55   28.00
  -6 -10  -2    3.80    4.70
   6 -10   2   -1.90    5.20
   6 -10   2   -1.00    7.20
  -6 -10  -2    3.40    5.90
   6  10   2    0.50    4.20
  -6  10  -2    3.70    2.40
  -6  10  -2   -0.80    4.80
   6  10   2   -2.90    7.90
  -6  10  -2   -2.10   10.00
   6  10   2    4.00    4.80
  -7 -10  -2   80.69   12.10
   7 -10   2   82.29   10.10
  -7 -10  -2   82.29    9.10
   7 -10   2   65.49   13.00
   7  10   2   84.89    8.40
   7  10   2  104.59    9.40
  -7  10  -2   84.89   16.10
   7  10   2   83.49   16.30
  -7  10  -2   79.49    5.60
  -7  10  -2   86.99    9.80
   8 -10   2  448.16   25.70
   8 -10   2  470.45   23.50
  -8 -10  -2  394.66   32.80
  -8 -10  -2  452.55   22.90
   8  10   2  458.05   23.00
   8  10   2  442.96   27.70
  -8  10  -2  466.85   28.20
   8  10   2  486.15   22.40
  -8  10  -2  462.85   23.30
   9 -10   2  404.76   25.50
  -9 -10  -2  382.46   23.20
   9 -10   2  395.96   21.80
  -9 -10  -2  376.26   20.80
   9 -10   2  370.26   18.30
   9  10   2  414.96   20.50
  -9  10  -2  349.47   27.20
   9  10   2  395.76   26.80
  -9  10  -2  364.46   30.90
   9  10   2  396.26   21.00
 -10 -10  -2   11.30   10.70
  10 -10   2   -0.60    7.30
  10 -10   2    6.20   10.90
 -10 -10  -2    1.10    6.50
  10 -10   2    5.10    4.60
  10  10   2    3.00    7.10
 -10  10  -2    2.70    7.20
 -10  10  -2    6.60   12.80
  10  10   2   -6.70    6.30
  10  10   2    7.40   12.50
 -11 -10  -2  554.74   28.50
  11 -10   2  550.14   26.40
  11 -10   2  534.95   31.70
  11 -10   2  558.04   29.00
 -11 -10  -2  558.04   32.80
 -11  10  -2  580.54   28.80
  11  10   2  594.54   28.50
  11  10   2  544.05   28.20
 -11  10  -2  564.34   34.20
  11  10   2  575.04   37.20
 -12 -10  -2  297.87   23.70
  12 -10   2  316.27   17.70
 -12 -10  -2  303.47   19.30
  12 -10   2  299.77   23.20
 -12  10  -2  325.97   26.10
  12  10   2  302.17   18.70
  12  10   2  296.77   18.20
 -12  10  -2  326.87   20.30
  12  10   2  299.77   30.20
  13 -10   2    8.10   13.80
 -13 -10  -2   11.50    7.40
  13 -10   2    6.70    6.30
 -13 -10  -2   24.20   10.60
 -13  10  -2   30.80   12.40
  13  10   2   -1.20   17.10
  13  10   2   21.50    8.30
 -13  10  -2    1.10    7.60
  14 -10   2  151.68   15.90
 -14 -10  -2  193.78   18.10
 -14 -10  -2  177.18   15.20
  14 -10   2  143.49   21.80
 -14  10  -2  182.78   16.30
  14  10   2  173.58   14.60
 -15 -10  -2  159.68   15.20
 -15 -10  -2  207.58   18.10
  15 -10   2  164.98   20.30
  15  10   2  175.18   14.90
 -15  10  -2  165.18   16.80
  15 -11  -2    6.20   12.20
  15  11  -2   26.60    8.70
 -15  11   2   12.80    8.80
  14 -11  -2   64.39   11.70
 -14 -11   2   49.70    8.80
  14 -11  -2   63.09   15.80
 -14  11   2   59.49    9.80
  14  11  -2   93.99   13.20
  13 -11  -2   79.59   12.40
 -13 -11   2  133.19   15.90
  13 -11  -2  102.69   13.30
  13 -11  -2  108.39   17.10
 -13 -11   2  105.49   12.60
  13  11  -2   74.59   10.10
 -13  11   2  102.49   13.90
  13  11  -2   72.09   19.10
 -13  11   2  110.39   21.30
  13  11  -2  110.69   13.70
 -12 -11   2   79.09   11.50
  12 -11  -2   91.09   16.40
  12 -11  -2   96.89   15.00
 -12  11   2   92.49   13.00
  12  11  -2   97.69   13.20
  12  11  -2   75.79   17.70
  12  11  -2  100.89   13.40
 -12  11   2   88.69   17.70
  11 -11  -2  161.08   16.20
  11 -11  -2  201.78   20.40
  11 -11  -2  202.78   14.80
 -11 -11   2  192.48   15.30
 -11 -11   2  201.68   18.00
 -11  11   2  168.28   21.50
  11  11  -2  194.08   27.10
  11  11  -2  179.68   15.60
  11  11  -2  188.38   15.50
 -11  11   2  194.98   16.40
 -10 -11   2  319.97   18.70
  10 -11  -2  336.07   22.90
  10 -11  -2  324.47   20.80
  10 -11  -2  348.47   19.10
 -10 -11   2  334.47   22.80
 -10  11   2  357.36   20.30
 -10  11   2  331.47   28.90
  10  11  -2  326.27   20.20
  10  11  -2  339.77   20.10
  10  11  -2  340.67   29.90
   9 -11  -2   91.49   12.00
  -9 -11   2   68.19   10.20
   9 -11  -2   92.19   13.70
   9 -11  -2   79.39   12.40
  -9 -11   2   78.69   13.60
   9  11  -2   76.89   10.10
   9  11  -2   62.89   14.60
  -9  11   2   75.09   11.50
  -9  11   2   92.79   17.80
   9  11  -2   68.39   11.20
   8 -11  -2  169.18   17.10
   8 -11  -2  187.08   14.40
  -8 -11   2  149.69   12.20
  -8 -11   2  154.08   14.50
  -8  11   2  161.58   13.10
   8  11  -2  164.48   13.60
   8  11  -2  173.98   22.10
  -8  11   2  162.08   32.90
   8  11  -2  180.18   12.90
  -7 -11   2   37.40    8.70
  -7 -11   2   31.10    6.30
   7 -11  -2   62.09   18.10
   7 -11  -2   47.50    8.00
   7  11  -2   34.60    7.20
  -7  11   2   31.10   13.80
   7  11  -2   53.89    8.70
   7  11  -2   36.30   11.30
  -6 -11   2    9.30    4.90
   6 -11  -2    8.60    5.70
   6 -11  -2   10.50    8.30
  -6 -11   2    8.40    6.50
   6  11  -2    2.40    5.10
   6  11  -2    1.30    5.90
  -6  11   2    4.00    3.80
  -6  11   2    8.10    5.20
   6  11  -2    7.90    9.00
  -6  11   2    4.80   12.30
   5 -11  -2   15.10    7.50
  -5 -11   2   10.90    5.60
  -5 -11   2   17.00    4.90
   5 -11  -2   15.40    5.70
  -5  11   2   14.90    5.10
   5  11  -2   11.90    9.30
  -5  11   2   17.10   11.10
   5  11  -2   12.60    5.40
   5  11  -2   13.50    5.10
  -5  11   2   11.80    4.10
  -4 -11   2  471.95   22.60
   4 -11  -2  494.35   23.60
  -4 -11   2  458.35   22.00
   4 -11  -2  475.65   22.40
  -4  11   2  457.45   22.10
   4  11  -2  441.36   24.90
  -4  11   2  456.95   21.70
   4  11  -2  472.25   22.00
  -4  11   2  465.25   26.60
   4  11  -2  454.65   22.50
  -3 -11   2  601.84   27.40
   3 -11  -2  644.54   28.40
   3 -11  -2  589.54   27.30
  -3 -11   2  579.14   27.20
  -3  11   2  596.54   27.30
  -3  11   2  602.34   27.50
   3  11  -2  597.04   30.10
   3  11  -2  593.04   27.80
  -3  11   2  603.84   30.90
   3  11  -2  614.14   27.20
  -2 -11   2  192.28   11.20
  -2 -11   2  188.18   11.40
   2 -11  -2  199.88   12.80
   2 -11  -2  194.08   11.90
  -2  11   2  195.68   11.80
   2  11  -2  180.78   12.10
  -2  11   2  189.18   12.30
   2  11  -2  158.58   17.20
  -2  11   2  203.48   16.00
   2  11  -2  196.38   11.40
   1 -11  -2  599.84   25.00
  -1 -11   2  514.35   24.20
   1 -11  -2  529.55   24.70
   1  11  -2  522.05   26.40
   1  11  -2  505.35   24.90
  -1  11   2  533.55   25.30
   1  11  -2  530.25   24.40
  -1  11   2  564.04   27.90
  -1  11   2  523.75   24.70
   0 -11  -2  850.21   34.20
   0 -11  -2  755.52   34.10
   0 -11   2  761.32   34.20
   0  11  -2  821.12   35.50
   0  11   2  831.82   37.50
   0  11  -2  764.22   34.60
   0  11   2  755.82   34.10
   0  11   2  737.13   35.30
   0  11  -2  727.53   34.90
  -1 -11  -2  397.26   17.00
   1 -11   2  345.67   18.30
  -1 -11  -2  344.17   17.80
  -1 -11  -2  333.47   17.10
   1 -11   2  331.17   16.70
  -1  11  -2  342.07   17.50
  -1  11  -2  330.57   17.70
  -1  11  -2  352.46   19.10
   1  11   2  343.67   17.40
   1  11   2  291.77   19.30
  -2 -11  -2 1137.29   49.10
   2 -11   2 1224.88   49.40
   2 -11   2 1127.49   47.90
  -2 -11  -2 1076.79   47.90
   2  11   2 1062.29   49.70
   2  11   2 1119.49   48.10
  -2  11  -2 1122.09   48.20
  -2  11  -2 1147.39   49.60
  -2  11  -2 1071.99   47.70
  -3 -11  -2  778.42   34.80
   3 -11   2  791.32   34.70
  -3 -11  -2  787.42   35.80
   3 -11   2  816.72   36.30
   3  11   2  745.63   37.00
  -3  11  -2  779.72   36.20
  -3  11  -2  773.42   34.00
   3  11   2  801.42   33.70
   3  11   2  788.82   34.80
  -3  11  -2  812.32   37.20
   4 -11   2   -2.20    4.40
  -4 -11  -2    2.70    4.10
   4 -11   2    5.20    6.50
  -4 -11  -2   -1.70    5.30
   4  11   2   -4.10    4.60
  -4  11  -2    1.70    4.90
   4  11   2   -1.70    7.60
   4  11   2   -1.00    3.60
  -4  11  -2    5.80    3.40
  -4  11  -2   -1.90    9.40
  -5 -11  -2  152.28   10.70
   5 -11   2  144.49   12.70
  -5 -11  -2  151.88   12.40
  -5  11  -2  158.58   11.10
  -5  11  -2  140.29   16.10
   5  11   2  146.59   10.70
   5  11   2  146.39    9.20
   5  11   2  133.49   14.40
  -5  11  -2  154.78    8.40
  -6 -11  -2  127.89   10.50
   6 -11   2  136.19   11.40
  -6 -11  -2  128.99   12.90
   6 -11   2  151.58   14.60
   6  11   2  134.89   15.30
  -6  11  -2  142.49   18.20
  -6  11  -2  147.59    7.80
  -6  11  -2  126.09   11.10
   6  11   2  140.79    9.60
   6  11   2  131.19   10.80
   7 -11   2  434.56   25.20
   7 -11   2  434.46   22.40
  -7 -11  -2  399.76   21.30
  -7 -11  -2  415.96   24.20
   7  11   2  418.26   27.20
   7  11   2  416.96   21.50
  -7  11  -2  433.86   21.90
  -7  11  -2  417.46   26.60
  -7  11  -2  407.26   18.50
   7  11   2  441.86   20.50
  -8 -11  -2    4.50    8.20
  -8 -11  -2    7.00    6.10
   8 -11   2   -5.30   10.40
   8 -11   2   -1.40    6.40
  -8  11  -2    3.30    2.70
   8  11   2    3.20    5.70
  -8  11  -2    3.70   11.50
  -8  11  -2    1.60    6.10
   8  11   2    1.50    5.80
   8  11   2    6.60   12.00
   9 -11   2    4.90    7.50
  -9 -11  -2   14.60   10.00
   9 -11   2   12.40   10.70
  -9 -11  -2   14.90   10.50
  -9  11  -2   15.20    7.00
   9  11   2   22.20    6.70
   9  11   2   15.80    6.50
   9  11   2   10.80   13.30
  -9  11  -2   20.80   12.80
 -10 -11  -2  329.17   23.50
 -10 -11  -2  321.47   19.30
  10 -11   2  316.57   19.70
  10 -11   2  306.87   23.00
 -10  11  -2  331.27   19.90
 -10  11  -2  330.57   25.20
  10  11   2  303.37   28.00
  10  11   2  321.97   19.10
  10  11   2  337.67   18.90
  11 -11   2   42.70    9.00
 -11 -11  -2   81.19   15.40
 -11 -11  -2   59.49    8.90
  11 -11   2   59.69   14.40
  11  11   2   50.19    8.40
  11  11   2   74.69   10.90
  11  11   2   61.29   16.80
 -11  11  -2   47.40    8.60
  12 -11   2   62.39    8.10
  12 -11   2   58.09   15.00
 -12 -11  -2   71.29   11.50
 -12 -11  -2   96.49   16.30
  12  11   2   71.29    9.40
 -12  11  -2   59.09   10.00
  12  11   2   51.99   15.90
  12  11   2   71.89   11.40
 -13 -11  -2  369.46   22.40
 -13 -11  -2  359.76   25.10
  13 -11   2  354.66   19.60
  13 -11   2  359.86   26.40
  13  11   2  392.46   22.00
 -13  11  -2  429.06   29.20
  13  11   2  337.07   30.80
 -13  11  -2  385.96   23.40
 -14 -11  -2   73.69   10.40
  14 -11   2   66.09   16.20
 -14  11  -2   64.89   10.30
 -15 -11  -2   31.00   12.00
 -15 -11  -2   -8.10    7.00
  15 -11   2  -12.30   14.20
  15  11   2    4.40    7.80
 -15  11  -2   -8.80    8.00
 -15 -12   2   94.89   13.20
  15 -12  -2   85.79   18.30
 -15  12   2   90.59   14.90
  15  12  -2  119.49   13.00
  14 -12  -2    5.50   13.60
 -14 -12   2   29.00    8.10
  14  12  -2   44.30    9.70
 -14  12   2   49.20   15.40
 -14  12   2   30.80    9.00
 -13 -12   2   23.60    7.60
  13 -12  -2   18.80   12.40
 -13  12   2   49.99   15.40
  13  12  -2   29.70    7.30
 -13  12   2   21.00    8.90
  13  12  -2   35.30    8.80
 -12 -12   2   27.00   10.50
 -12 -12   2   12.90    7.20
  12 -12  -2   14.80   13.10
  12 -12  -2   18.60    7.30
 -12  12   2    9.00    7.40
  12  12  -2   -5.50   17.10
 -12  12   2   18.70   13.10
  12  12  -2   12.20    8.00
  12  12  -2   -0.90    7.20
  11 -12  -2    1.40    5.70
  11 -12  -2  -15.80    7.80
 -11 -12   2   -3.70    9.20
 -11 -12   2   -9.20    7.10
  11 -12  -2   -3.10   10.60
 -11  12   2  -11.00   14.80
  11  12  -2  -16.30   13.70
  11  12  -2   -3.20    7.20
 -11  12   2   -5.70    6.80
  11  12  -2   -6.80    6.80
 -10 -12   2    4.60    6.50
 -10 -12   2   31.50   11.00
  10 -12  -2    6.70    8.80
  10 -12  -2   26.80   12.70
 -10  12   2   13.00    7.00
  10  12  -2   24.40    8.10
  10  12  -2   13.70    7.30
 -10  12   2   20.30   15.60
  10  12  -2   15.10   14.00
  -9 -12   2   99.29   14.00
  -9 -12   2  113.99   11.50
   9 -12  -2  108.49   15.10
   9 -12  -2  109.69   13.50
  -9  12   2  109.29   12.50
   9  12  -2  116.09   23.10
  -9  12   2  115.89   22.80
   9  12  -2   98.59   12.40
   9  12  -2  109.79   11.70
   8 -12  -2    2.70    9.10
   8 -12  -2   -2.60    7.30
  -8 -12   2    8.60    7.80
  -8 -12   2    6.20    5.30
  -8  12   2    1.70    6.40
  -8  12   2    8.00    4.50
   8  12  -2   10.40   13.10
  -8  12   2   14.00   15.70
   8  12  -2    0.40    6.10
   8  12  -2   -2.10    6.50
  -7 -12   2   -3.40    6.70
   7 -12  -2   -6.20    9.00
   7 -12  -2   -0.10    6.60
  -7 -12   2    0.90    5.60
  -7  12   2   -8.60   14.10
  -7  12   2   -2.60    5.90
   7  12  -2   -6.80   10.30
   7  12  -2   -6.40    5.90
   7  12  -2   -5.50    6.10
  -7  12   2    0.30    4.20
  -6 -12   2   11.00    5.40
  -6 -12   2   15.20    6.40
   6 -12  -2   19.00    8.80
   6  12  -2   14.30    5.80
   6  12  -2    4.90    5.50
  -6  12   2   11.90    4.40
  -6  12   2   11.80   12.80
   6  12  -2   11.60   11.00
  -6  12   2   11.70    5.70
   5 -12  -2   13.40    8.10
   5 -12  -2   11.60    5.50
  -5 -12   2   12.10    4.90
  -5 -12   2   15.30    5.50
   5  12  -2    8.60    9.70
  -5  12   2   12.20    4.50
   5  12  -2    9.00    5.80
  -5  12   2    8.80    5.00
   5  12  -2   14.70    5.50
  -5  12   2   10.50   11.90
   4 -12  -2    7.90    7.10
  -4 -12   2    2.70    4.50
   4 -12  -2    9.20    4.80
  -4 -12   2    8.30    4.80
  -4  12   2    7.10   10.40
   4  12  -2    5.50    4.70
   4  12  -2    5.50    5.20
   4  12  -2    5.60    7.60
  -4  12   2    2.80    4.20
  -4  12   2    4.80    4.80
   3 -12  -2    0.50    4.90
   3 -12  -2   -6.30    6.30
  -3 -12   2   -3.10    4.10
  -3 -12   2    2.80    4.10
   3  12  -2   -2.50    7.60
  -3  12   2   -1.80    9.00
   3  12  -2   -5.60    4.90
  -3  12   2   -1.30    4.40
  -3  12   2    4.90    4.80
   3  12  -2   -1.90    4.40
  -2 -12   2  646.44   28.70
   2 -12  -2  680.13   29.60
   2 -12  -2  622.64   28.80
  -2 -12   2  628.84   28.80
   2  12  -2  626.34   28.60
   2  12  -2  607.04   31.00
   2  12  -2  628.14   29.30
  -2  12   2  606.44   29.10
  -2  12   2  657.33   29.00
  -2  12   2  674.43   33.00
  -1 -12   2   15.00    4.60
   1 -12  -2   19.80    4.80
   1 -12  -2   23.00    5.90
  -1  12   2   18.40    4.90
   1  12  -2   22.10    5.20
  -1  12   2   12.90    9.00
  -1  12   2   14.40    5.70
   1  12  -2   26.20    7.10
   1  12  -2   10.80    4.90
   0 -12  -2   17.30    5.30
   0 -12   2    3.20    6.00
   0 -12   2   10.50    4.70
   0 -12  -2   20.20    5.20
   0  12  -2   21.30    7.10
   0  12   2   15.10    4.80
   0  12  -2   12.20    6.00
   0  12   2   16.50    8.30
   0  12  -2   10.90    5.20
   0  12   2    8.10    6.00
  -1 -12  -2  377.56   18.90
   1 -12   2  394.96   19.20
  -1 -12  -2  434.86   18.90
   1 -12   2  421.86   20.40
  -1  12  -2  368.16   19.10
  -1  12  -2  401.26   21.10
  -1  12  -2  378.76   19.80
   1  12   2  388.36   19.30
   1  12   2  356.86   20.40
   2 -12   2   99.29    8.60
  -2 -12  -2   93.39    7.80
   2 -12   2   93.59   11.10
  -2 -12  -2   91.19    9.00
  -2  12  -2  104.99    9.10
  -2  12  -2   89.69   11.90
   2  12   2   89.69   10.60
   2  12   2   95.19    8.90
  -2  12  -2   84.49    9.00
   3 -12   2    0.70    4.50
  -3 -12  -2   -1.20    5.00
  -3 -12  -2    0.10    4.50
   3 -12   2   -1.80    7.00
   3  12   2   -5.40    7.20
  -3  12  -2    5.00    4.10
  -3  12  -2    1.30    4.80
  -3  12  -2   -2.90    8.60
   3  12   2   -4.90    4.50
   3  12   2    2.00    3.40
   4 -12   2  232.28   13.40
  -4 -12  -2  218.38   13.10
   4 -12   2  228.88   15.90
  -4 -12  -2  215.58   14.70
   4  12   2  225.28   13.30
  -4  12  -2  227.48   11.90
  -4  12  -2  214.98   13.50
   4  12   2  206.98   16.10
  -4  12  -2  209.68   18.30
   4  12   2  212.58   11.50
  -5 -12  -2  270.77   17.00
   5 -12   2  281.57   18.40
  -5 -12  -2  255.37   15.10
  -5  12  -2  269.47   15.60
  -5  12  -2  276.17   21.20
   5  12   2  273.67   13.80
   5  12   2  247.28   20.40
  -5  12  -2  278.77   13.40
   5  12   2  274.57   15.40
   6 -12   2    4.60    6.00
  -6 -12  -2    2.90    5.40
   6 -12   2   13.60   11.90
  -6 -12  -2   -0.10    7.00
  -6  12  -2   -0.70   11.50
   6  12   2    3.40    5.40
   6  12   2    0.70    4.50
   6  12   2    5.10   10.60
  -6  12  -2    5.80    6.00
  -6  12  -2   10.80    3.30
   7 -12   2  119.99   16.30
  -7 -12  -2  116.99   11.10
  -7 -12  -2  134.99   14.10
   7 -12   2  112.29   12.80
   7  12   2  122.19   10.20
  -7  12  -2  119.69   18.10
   7  12   2  140.39   11.60
   7  12   2  136.49   19.10
  -7  12  -2  128.29   12.00
  -7  12  -2  136.29    7.70
   8 -12   2   62.19   12.00
  -8 -12  -2   62.09    9.80
  -8 -12  -2   64.99   13.20
   8 -12   2   42.50    8.40
   8  12   2   59.49    9.90
   8  12   2   58.19   14.20
  -8  12  -2   69.99    5.40
  -8  12  -2   82.29   17.70
   8  12   2   64.69    8.80
   9 -12   2  386.56   26.10
  -9 -12  -2  360.56   24.20
  -9 -12  -2  351.06   20.70
   9 -12   2  377.16   21.50
   9  12   2  390.66   21.00
   9  12   2  374.36   28.80
   9  12   2  389.96   20.00
  -9  12  -2  365.96   27.80
  -9  12  -2  379.06   16.70
  -9  12  -2  378.66   21.50
 -10 -12  -2   -3.40    6.60
  10 -12   2    8.30    7.70
 -10 -12  -2    9.40   10.20
  10 -12   2   15.60   11.60
  10  12   2   15.70    6.70
  10  12   2   -7.00    6.10
 -10  12  -2    1.00    7.00
  10  12   2    7.00   14.00
 -10  12  -2   16.00    3.10
 -10  12  -2   28.80   12.70
 -11 -12  -2    5.90    6.40
 -11 -12  -2   13.10   10.50
  11 -12   2   -8.80    6.20
  11 -12   2   -0.80   11.30
  11  12   2    6.60    7.10
 -11  12  -2   13.00    7.90
  11  12   2    3.40    6.40
 -11  12  -2   29.40   13.00
  11  12   2   27.80   14.00
 -12 -12  -2   91.19   15.60
  12 -12   2   56.29   15.30
 -12 -12  -2   60.79    9.50
  12  12   2   61.39   10.80
  12  12   2   68.69   18.20
 -12  12  -2   65.69   10.80
  13 -12   2   17.30   14.40
 -13 -12  -2   32.80   10.60
  13  12   2   13.50    7.40
 -13  12  -2   -2.50    8.10
 -14 -12  -2   61.69    9.50
  14 -12   2   60.49   17.00
 -14  12  -2   63.79   11.10
 -15 -12  -2  125.89   14.70
  15 -12   2   97.69   17.80
 -15  12  -2  145.49   16.10
  15  12   2  175.48   14.60
  14  13  -2   75.79   11.80
 -14  13   2   95.39   21.00
  13 -13  -2   27.10   14.70
 -13 -13   2   33.30    8.30
 -13  13   2   52.59   15.80
  13  13  -2   44.80    8.90
 -13  13   2   31.50    9.00
 -12 -13   2   97.99   11.90
  12 -13  -2   96.59   16.90
 -12 -13   2  127.29   16.30
  12 -13  -2   76.39   13.00
 -12  13   2  132.89   22.30
  12  13  -2  109.89   13.20
  12  13  -2  125.79   13.90
 -12  13   2  105.69   14.40
  11 -13  -2  -14.30    8.00
 -11 -13   2   -5.60    9.00
 -11 -13   2   -6.50    6.10
  11 -13  -2    1.80   12.50
  11  13  -2    3.50    7.30
 -11  13   2   -7.00    7.20
  11  13  -2   -6.80   14.10
 -11  13   2   -3.60   13.10
 -10 -13   2   80.39   13.80
  10 -13  -2   71.29   13.20
 -10 -13   2   66.29   10.50
  10 -13  -2   69.49   10.50
  10  13  -2   73.59   12.00
 -10  13   2   80.09   17.70
 -10  13   2   68.39   12.50
  10  13  -2   62.89   17.40
   9 -13  -2  154.68   18.40
  -9 -13   2  122.29   14.80
   9 -13  -2  135.79   14.50
  -9 -13   2  124.79   12.10
   9  13  -2  136.99   12.50
  -9  13   2  125.69   23.30
   9  13  -2  109.59   13.00
  -9  13   2  137.29   10.40
   9  13  -2  136.79   24.10
  -9  13   2  130.19   13.50
  -8 -13   2   -9.40    5.70
   8 -13  -2  -10.30    7.10
   8 -13  -2   -8.80   10.50
  -8 -13   2   -0.60    8.10
  -8  13   2    5.90    4.60
  -8  13   2   -4.10    6.60
   8  13  -2   -2.70   11.70
   8  13  -2   -0.40    6.90
   8  13  -2   -6.10    6.40
  -8  13   2    8.40   14.90
   7 -13  -2   28.00   10.60
   7 -13  -2   30.00    7.90
  -7 -13   2   24.10    8.10
  -7 -13   2   13.70    6.00
   7  13  -2   15.90    7.30
  -7  13   2   17.30    6.70
   7  13  -2   28.40    6.80
  -7  13   2   25.20    5.20
   7  13  -2   23.50   11.80
  -7  13   2   27.20   16.00
   6 -13  -2    6.00   10.80
  -6 -13   2    8.50    6.50
  -6 -13   2    5.90    5.20
   6  13  -2    7.80   11.30
  -6  13   2   11.00   13.90
   6  13  -2   -1.30    6.30
   6  13  -2    5.30    5.90
  -6  13   2    6.10    4.70
  -6  13   2    5.30    6.00
  -5 -13   2  254.67   15.70
   5 -13  -2  274.97   18.00
  -5 -13   2  244.78   14.90
   5 -13  -2  254.27   15.10
   5  13  -2  248.88   16.00
  -5  13   2  265.57   15.60
   5  13  -2  242.58   21.10
  -5  13   2  242.38   14.40
   5  13  -2  252.97   14.90
  -5  13   2  257.57   22.50
  -4 -13   2  744.73   33.40
   4 -13  -2  747.83   33.60
  -4 -13   2  748.53   33.10
   4 -13  -2  766.32   34.60
   4  13  -2  716.53   33.60
   4  13  -2  698.63   32.60
   4  13  -2  715.43   36.80
  -4  13   2  733.53   37.80
  -4  13   2  734.33   33.30
  -4  13   2  697.73   32.70
  -3 -13   2    8.90    4.70
  -3 -13   2    7.90    4.80
   3 -13  -2    7.90    6.80
   3 -13  -2    6.20    5.50
   3  13  -2   15.10    8.30
   3  13  -2   13.40    5.20
  -3  13   2   12.50   10.60
  -3  13   2   11.00    5.40
   3  13  -2    6.90    5.60
  -3  13   2   18.20    5.30
  -2 -13   2   18.40    5.00
   2 -13  -2   16.70    5.40
   2 -13  -2   22.40    6.70
  -2  13   2   14.40    7.10
   2  13  -2   18.20    5.10
  -2  13   2   14.50    4.80
   2  13  -2   19.60    5.20
  -2  13   2   11.40   10.20
   2  13  -2   18.60    8.00
   1 -13  -2   -5.50    5.60
   1 -13  -2   10.40    4.60
  -1 -13   2    9.80    4.60
   1  13  -2    0.40    4.60
  -1  13   2   -1.80    5.80
   1  13  -2    1.50    6.70
  -1  13   2    6.60    4.90
   1  13  -2    9.80    7.10
  -1  13   2    0.50    8.70
   0 -13  -2   19.40    5.90
   0 -13  -2   22.50    5.00
   0 -13   2   14.40    4.90
   0 -13   2   23.60    6.90
   0  13  -2   12.10    5.50
   0  13   2   18.50    4.90
   0  13  -2   16.20    8.40
   0  13   2   16.50    6.60
   0  13   2   23.10    9.00
   0  13  -2   18.20    7.50
   1 -13   2   20.80    7.20
  -1 -13  -2   17.30    4.70
   1 -13   2   19.50    5.10
  -1 -13  -2   22.80    5.50
  -1  13  -2   17.60    6.10
   1  13   2   18.10    7.10
  -1  13  -2   24.00    8.10
   1  13   2   14.70    5.30
  -1  13  -2   11.10    5.20
   2 -13   2   90.69   10.70
   2 -13   2   79.39    8.80
  -2 -13  -2   87.19    9.60
  -2 -13  -2   91.69    8.90
   2  13   2   91.89    9.20
   2  13   2   92.29   12.40
  -2  13  -2   96.79    9.40
  -2  13  -2   89.79   13.20
  -2  13  -2   89.49    8.70
  -3 -13  -2  501.45   25.00
  -3 -13  -2  497.95   24.10
   3 -13   2  544.35   26.20
   3 -13   2  511.05   24.20
   3  13   2  480.15   27.10
   3  13   2  498.95   22.60
   3  13   2  508.65   24.30
  -3  13  -2  484.65   23.50
  -3  13  -2  502.75   24.40
  -3  13  -2  517.45   27.80
   4 -13   2  129.39   13.70
  -4 -13  -2  119.09   10.30
  -4 -13  -2  117.99   11.90
   4 -13   2  130.59   10.60
   4  13   2  132.09   10.70
  -4  13  -2  113.39   11.00
   4  13   2  121.79    8.50
  -4  13  -2  120.79   16.80
  -4  13  -2  140.29    9.70
   4  13   2  125.29   14.10
  -5 -13  -2    0.60    4.90
   5 -13   2   -7.70    5.90
  -5 -13  -2   -3.70    6.40
   5 -13   2    0.30   10.80
   5  13   2   -3.80    5.00
  -5  13  -2   -3.80    5.70
  -5  13  -2    0.20   11.40
   5  13   2   -4.70    8.80
  -5  13  -2    0.80    4.00
   5  13   2   -3.30    4.10
   6 -13   2  132.79   12.30
  -6 -13  -2  145.69   13.70
   6 -13   2  158.88   16.40
  -6 -13  -2  145.89   11.70
   6  13   2  136.69   12.00
  -6  13  -2  154.98   12.70
  -6  13  -2  134.69   19.80
   6  13   2  139.99   10.00
   6  13   2  129.49   16.90
  -6  13  -2  155.08    9.10
  -7 -13  -2   37.50    7.30
   7 -13   2   60.29   12.50
   7 -13   2   33.10    8.00
  -7  13  -2   38.00    7.50
   7  13   2   48.40    7.60
   7  13   2   33.40   11.40
  -7  13  -2   35.50   13.60
   7  13   2   47.60    7.30
   8 -13   2   -1.20    7.40
  -8 -13  -2   15.10    9.70
   8 -13   2    4.80   10.40
  -8  13  -2    7.10    7.00
   8  13   2   15.80    6.80
   8  13   2    5.90    6.20
   8  13   2    2.50   11.50
  -8  13  -2    6.50   18.60
   9 -13   2  108.19   18.20
  -9 -13  -2  122.99   15.70
  -9 -13  -2  101.49   11.80
   9 -13   2   88.49   12.60
   9  13   2  146.49   22.10
   9  13   2   95.39   11.70
  -9  13  -2  115.69   11.90
   9  13   2  118.39   10.80
  -9  13  -2  118.19   18.90
 -10 -13  -2   -1.40    6.50
  10 -13   2    3.40   12.90
 -10 -13  -2    7.60   10.20
 -10  13  -2    5.40   12.30
  10  13   2    5.20    6.40
  10  13   2    7.60   14.20
 -10  13  -2    1.30    7.50
  10  13   2    8.30    6.40
 -11 -13  -2   41.00    8.30
 -11 -13  -2   57.89   12.50
  11 -13   2   38.50   14.40
 -11  13  -2   53.29   14.20
 -11  13  -2   34.10    8.40
  11  13   2   58.49   10.00
  11  13   2   38.80   14.80
 -12 -13  -2   92.79   16.10
  12 -13   2   44.10   15.50
 -12 -13  -2   75.89   11.90
  12  13   2   86.19   10.70
 -12  13  -2  112.49   18.90
  13 -13   2   -1.40   13.90
  13  13   2   27.30    7.80
  14 -13   2    8.00   13.10
  14  14  -2   68.39   11.80
 -14  14   2  101.19   21.10
 -13 -14   2   32.50   10.40
  13 -14  -2   14.10   13.60
  13  14  -2   32.40    8.00
 -13  14   2   12.60    8.40
 -13  14   2   36.30   15.50
 -12 -14   2    8.70    6.70
  12 -14  -2    2.40   13.20
  12  14  -2   24.00    7.60
  12  14  -2    4.10    6.70
 -12  14   2    6.80    7.90
 -12  14   2   20.60   14.60
 -11 -14   2   41.10    7.70
  11 -14  -2   13.80    8.60
 -11 -14   2   58.89   12.00
  11 -14  -2   38.20   14.10
 -11  14   2   40.00    8.90
  11  14  -2   39.20    8.70
 -11  14   2   39.10   16.90
  11  14  -2   35.60   17.60
  11  14  -2   61.49   10.50
  10 -14  -2   -3.70    7.70
 -10 -14   2   -6.00    8.40
  10 -14  -2   -2.00   11.60
 -10  14   2    5.60    4.90
 -10  14   2    0.60    7.00
  10  14  -2    1.10   15.30
 -10  14   2    2.80   14.70
  10  14  -2  -11.50    7.30
   9 -14  -2   -4.90   11.30
   9 -14  -2   -8.90    8.00
  -9 -14   2    0.50    6.20
  -9 -14   2    8.40    9.20
   9  14  -2   13.80    7.20
  -9  14   2    6.00    8.10
  -9  14   2    6.90   14.70
   9  14  -2    3.50    6.70
   9  14  -2   -4.60   14.60
  -9  14   2   14.80    5.00
   8 -14  -2  136.99   17.80
   8 -14  -2  136.99   14.40
  -8 -14   2  141.89   12.40
   8  14  -2  137.19   13.60
  -8  14   2  163.28   11.10
   8  14  -2  147.49   12.40
  -8  14   2  150.68   13.70
   8  14  -2  134.79   20.30
  -8  14   2  131.99   23.70
  -7 -14   2   -1.90    7.20
   7 -14  -2    3.20    7.20
  -7 -14   2   -3.60    5.90
   7 -14  -2   -1.80   10.20
   7  14  -2   -3.20    6.50
  -7  14   2   -2.60    6.40
   7  14  -2   -9.20   10.80
  -7  14   2    2.50    4.80
   7  14  -2   -8.00    5.80
  -6 -14   2   55.29    9.30
  -6 -14   2   65.49   10.60
   6 -14  -2   65.89   11.80
  -6  14   2   63.59    8.60
   6  14  -2   60.89    9.10
  -6  14   2   67.69   10.60
   6  14  -2   66.49    8.80
   6  14  -2   53.59   12.30
  -6  14   2   71.49   16.50
  -5 -14   2    8.10    5.60
   5 -14  -2    3.70    9.00
   5 -14  -2   -0.80    6.40
  -5 -14   2    9.80    6.00
  -5  14   2    7.50   13.40
   5  14  -2    7.60   10.90
  -5  14   2    1.60    6.10
  -5  14   2   11.00    5.40
   5  14  -2    6.70    6.80
   5  14  -2    9.10    5.90
   4 -14  -2  114.99   13.00
   4 -14  -2  100.99   10.20
  -4 -14   2  107.09    9.90
  -4 -14   2  104.19   10.20
  -4  14   2  122.59   20.00
  -4  14   2  118.09   11.00
   4  14  -2  106.89   16.80
   4  14  -2  103.19    9.60
  -4  14   2  109.79   10.80
   4  14  -2  105.99   10.40
   3 -14  -2  300.97   18.20
   3 -14  -2  271.87   16.60
  -3 -14   2  283.47   15.80
  -3 -14   2  281.87   15.90
  -3  14   2  286.27   21.60
   3  14  -2  264.27   20.30
   3  14  -2  285.37   15.80
  -3  14   2  287.57   16.60
   3  14  -2  281.17   16.70
  -2 -14   2   15.30    5.30
   2 -14  -2   16.80    6.00
   2 -14  -2   34.50    7.70
  -2  14   2   24.80    6.10
   2  14  -2   23.80    6.50
  -2  14   2   17.00   11.30
   2  14  -2   14.40    5.70
   2  14  -2   15.20    8.60
  -2  14   2   25.90    6.80
   1 -14  -2  374.26   19.50
   1 -14  -2  411.36   20.30
  -1 -14   2  403.76   20.00
  -1  14   2  376.76   19.90
   1  14  -2  431.36   22.60
   1  14  -2  358.26   19.80
   1  14  -2  367.96   22.00
  -1  14   2  353.16   20.60
  -1  14   2  437.76   25.30
   0 -14  -2    8.00    5.60
   0 -14  -2   12.20    6.10
   0 -14   2   11.20    7.20
   0 -14   2    5.40    4.50
   0  14  -2    5.70    7.20
   0  14   2   17.50   10.10
   0  14   2    8.00    5.10
   0  14  -2    6.10    8.20
   0  14  -2    6.20    5.40
   0  14   2   10.70    6.90
  -1 -14  -2   65.59    8.80
  -1 -14  -2   49.60    7.40
   1 -14   2   56.59   10.00
   1 -14   2   56.29    8.30
   1  14   2   56.09    9.30
  -1  14  -2   50.69    9.90
  -1  14  -2   44.30    7.20
   1  14   2   43.80    6.50
   1  14   2   64.69   12.70
  -1  14  -2   56.59   11.00
  -2 -14  -2   22.80    5.60
   2 -14   2   17.30    8.10
  -2 -14  -2   19.20    6.20
  -2 -14  -2   18.50    5.90
   2 -14   2   14.80    5.70
  -2  14  -2   19.20    6.30
  -2  14  -2   23.80    9.90
  -2  14  -2   14.10    6.10
   2  14   2   14.20    8.40
   2  14   2   15.40    6.10
   3 -14   2   22.90    6.20
  -3 -14  -2   22.00    6.60
  -3 -14  -2   17.30    5.60
   3 -14   2   26.30    9.00
   3  14   2   22.90    5.80
   3  14   2   19.20    9.20
  -3  14  -2   17.90   10.60
  -3  14  -2   15.60    6.20
  -3  14  -2   28.50    6.20
  -4 -14  -2   17.10    5.60
   4 -14   2   20.90    9.50
   4 -14   2   15.00    6.00
  -4 -14  -2   16.30    7.00
   4  14   2    6.40    9.10
  -4  14  -2   17.00    6.60
   4  14   2   11.90    5.80
  -4  14  -2   12.70   11.80
   4  14   2   17.70    4.60
  -5 -14  -2    3.10    5.60
   5 -14   2    8.20    6.40
   5 -14   2   17.50    9.90
  -5 -14  -2   10.10    6.90
   5  14   2    0.20    5.80
   5  14   2    1.40   10.40
   5  14   2   -0.80    4.50
  -5  14  -2    8.30    6.00
  -5  14  -2    1.60   11.80
   6 -14   2    7.10    6.50
  -6 -14  -2   14.40    7.90
   6 -14   2   11.70   10.40
  -6 -14  -2    2.60    5.30
   6  14   2   11.10   11.80
  -6  14  -2    9.10    6.80
  -6  14  -2    3.00   12.60
   6  14   2    7.30    6.40
   6  14   2   10.20    4.90
  -7 -14  -2   17.70    6.60
  -7 -14  -2   24.00    8.60
   7 -14   2   23.10   11.90
   7 -14   2   26.20    7.80
  -7  14  -2   33.50    8.40
   7  14   2   25.80    7.20
   7  14   2   24.90    6.00
   7  14   2   14.20   12.80
  -7  14  -2   24.30   13.00
   8 -14   2  161.18   14.40
   8 -14   2  153.48   17.30
  -8 -14  -2  146.89   13.20
  -8 -14  -2  151.28   16.10
   8  14   2  142.89   13.30
  -8  14  -2  170.28   14.60
   8  14   2  162.88   11.50
   8  14   2  161.98   20.20
   9 -14   2   41.10   13.90
  -9 -14  -2   42.90    8.20
  -9 -14  -2   44.80   11.00
  -9  14  -2   38.40    8.10
  -9  14  -2   46.70   14.30
   9  14   2   42.90    7.40
   9  14   2   37.30   13.40
   9  14   2   39.70    7.90
 -10 -14  -2    0.20    8.90
 -10 -14  -2   -2.00    6.10
  10 -14   2   -6.00   12.80
 -10  14  -2   -3.20    7.40
  10  14   2   -5.30   14.00
  10  14   2   -7.00    5.80
 -10  14  -2    6.20   11.90
  10  14   2   12.60    6.40
 -11 -14  -2   23.50    7.30
  11 -14   2   17.00   14.10
 -11 -14  -2   31.60   11.00
  11  14   2   36.00    7.50
 -11  14  -2   16.00    8.30
  11  14   2    5.70   13.80
 -11  14  -2   38.40   13.30
 -12 -14  -2   26.00    9.70
  12 -14   2   -5.30   13.40
  12  14   2   29.60    7.40
  13 -14   2   20.60   13.50
 -13 -14  -2   42.30    9.00
 -13 -14  -2   68.99   12.30
  13 -15  -2   14.50   12.70
 -13 -15   2   37.20    8.40
 -13  15   2   29.20    9.60
 -13  15   2   60.19   16.60
  12 -15  -2   39.30   15.20
 -12 -15   2   42.80    8.60
 -12  15   2   52.09   15.90
 -12  15   2   21.90    8.20
  11 -15  -2   -8.20   12.30
 -11 -15   2    9.90    8.80
 -11 -15   2    2.50    6.50
 -11  15   2   -4.10    7.00
  11  15  -2   11.30    7.10
 -11  15   2  -10.80   15.00
  10 -15  -2   11.50   12.20
 -10 -15   2   13.00    8.80
 -10  15   2   -9.10   15.20
 -10  15   2    0.70    7.30
  10  15  -2  -14.30   15.30
  10  15  -2    8.50    7.40
  10  15  -2    1.10    7.30
  -9 -15   2   13.40    6.50
   9 -15  -2    9.80   11.90
  -9 -15   2   13.20    8.40
   9 -15  -2    8.40    8.50
  -9  15   2   -0.20   16.50
   9  15  -2   10.50   15.30
   9  15  -2    2.10    7.00
  -9  15   2    8.10    6.80
   9  15  -2   16.50    6.90
  -8 -15   2    2.50    6.30
  -8 -15   2    8.40    8.10
   8 -15  -2    9.90   11.40
   8 -15  -2   14.80    8.20
  -8  15   2    6.60    7.00
   8  15  -2    8.70   14.10
   8  15  -2    9.40    7.30
  -8  15   2   -6.40   15.80
   8  15  -2   12.80    6.80
  -8  15   2   23.80    5.80
   7 -15  -2    3.90    7.50
   7 -15  -2    7.90   11.00
  -7 -15   2    8.90    5.90
  -7 -15   2   10.70    7.70
  -7  15   2   -2.60   16.40
  -7  15   2   15.10    5.60
   7  15  -2   -9.20    6.40
   7  15  -2    8.10   13.20
   7  15  -2    0.30    6.20
  -7  15   2    5.60    7.00
  -6 -15   2   77.79   10.40
  -6 -15   2   90.59   11.20
   6 -15  -2   77.69   10.30
   6 -15  -2   77.99   12.60
   6  15  -2   69.69   11.60
  -6  15   2   98.69   10.20
   6  15  -2   68.69   14.40
  -6  15   2   97.79   11.50
  -6  15   2   84.39   17.70
   6  15  -2   91.29   10.10
   5 -15  -2    2.70    6.70
   5 -15  -2    1.30   11.10
  -5 -15   2   14.10    6.00
  -5 -15   2    2.80    5.70
  -5  15   2   14.40    6.70
   5  15  -2   15.50    6.30
   5  15  -2   -2.60    6.70
   5  15  -2    2.00   11.10
  -5  15   2    3.00   14.70
  -5  15   2   14.30    6.30
   4 -15  -2   33.20   10.00
  -4 -15   2   46.40    8.60
  -4 -15   2   34.40    6.90
   4 -15  -2   36.40    7.40
  -4  15   2   32.90    9.00
  -4  15   2   38.70   14.00
  -4  15   2   34.20    7.20
   4  15  -2   30.50    7.40
   4  15  -2   30.90   11.10
   4  15  -2   39.90    7.10
  -3 -15   2   27.80    6.40
  -3 -15   2   24.50    6.00
   3 -15  -2   19.60    6.90
   3 -15  -2   19.10    8.40
   3  15  -2   29.80    7.20
  -3  15   2   30.60    7.10
  -3  15   2   20.90   13.10
   3  15  -2   20.60    6.10
  -3  15   2   32.40    7.30
   3  15  -2   12.10    9.90
  -2 -15   2  100.29   10.00
   2 -15  -2   95.29   10.80
   2 -15  -2  106.29   12.30
  -2  15   2  113.59   18.10
  -2  15   2  104.79   12.10
   2  15  -2  131.49   14.40
   2  15  -2   90.29   11.40
  -2  15   2  103.39   10.70
   2  15  -2   99.19   14.80
  -1 -15   2   16.80    7.90
  -1 -15   2   21.50    6.00
   1 -15  -2   27.20    6.20
   1 -15  -2   18.30    7.50
   1  15  -2   27.80    6.50
  -1  15   2   24.80    6.30
   1  15  -2   24.70    9.40
   1  15  -2   25.10    8.90
  -1  15   2   21.90    7.50
  -1  15   2   10.10   11.70
   0 -15  -2  361.06   18.30
   0 -15  -2  324.37   18.40
   0 -15   2  320.17   18.10
   0 -15   2  356.36   19.30
   0  15   2  318.17   20.20
   0  15  -2  314.87   18.80
   0  15   2  328.27   18.50
   0  15  -2  329.37   20.10
   0  15  -2  354.06   21.70
   0  15   2  358.06   24.10
  -1 -15  -2  133.79   10.90
  -1 -15  -2  139.29   11.30
   1 -15   2  125.19   11.10
   1 -15   2  135.99   12.90
   1  15   2  114.99   11.30
   1  15   2  117.89   14.30
  -1  15  -2  126.29   15.90
   1  15   2  136.79   15.70
  -1  15  -2  138.09   13.60
  -1  15  -2  107.59   11.90
  -2 -15  -2   31.90    6.70
   2 -15   2   27.60    6.30
   2 -15   2   40.80    9.60
  -2 -15  -2   49.50    8.40
   2  15   2   32.70    6.80
  -2  15  -2   33.40    7.60
  -2  15  -2   36.40    7.60
  -2  15  -2   33.30   11.00
   2  15   2   40.40   10.00
  -3 -15  -2    4.80    6.40
   3 -15   2    0.30    8.90
  -3 -15  -2   16.20    5.90
   3 -15   2   -0.60    6.00
   3  15   2    1.30    8.40
  -3  15  -2   10.70    6.20
   3  15   2   -3.40    5.70
  -3  15  -2   -4.30   11.00
  -3  15  -2   11.20    6.50
   4 -15   2   18.20    6.60
  -4 -15  -2   18.30    7.30
  -4 -15  -2   20.60    6.20
   4 -15   2   30.90   12.80
   4  15   2   26.00    7.10
   4  15   2   15.10    9.90
  -4  15  -2    2.70   12.50
   4  15   2   16.00    4.90
  -4  15  -2   17.70    6.80
   5 -15   2  105.09   15.20
  -5 -15  -2   91.99   11.30
   5 -15   2   66.99    9.00
  -5 -15  -2   90.29   10.60
   5  15   2   92.79   18.10
   5  15   2   86.49   11.60
   5  15   2   89.69    7.90
  -5  15  -2   85.89   18.90
  -5  15  -2   95.19   10.40
  -6 -15  -2   47.20    7.60
   6 -15   2   45.50   12.10
   6  15   2   33.70    7.40
  -6  15  -2   32.50   13.90
   6  15   2   47.20   13.10
   6  15   2   51.29    7.30
   7 -15   2  -12.50    7.00
   7 -15   2    9.40   11.70
  -7 -15  -2    6.60    7.90
  -7 -15  -2    6.50    8.70
  -7  15  -2    0.40    6.90
   7  15   2    4.50    6.60
   7  15   2   10.70   11.40
  -7  15  -2    1.30   13.20
   7  15   2    6.40    5.10
[truncated: 3,617,850 more chars]
